# Supplementary material for: Identification and Validation of a Novel Ferroptotic Prognostic Genes-Based Signature of Clear Cell Renal Cell Carcinoma
Source: MDPI journal article supplement (doi:10.3390/cancers14194690), 2022-09-27
Supplement: s1 [file s1]

**Table S4** List of DEGs from three TCGA database

| gene_name | gene_id         | gene_biotype   | baseMean   | log2FoldChange | lfcSE      | stat       | pvalue     | padj       |
|-----------|-----------------|----------------|------------|----------------|------------|------------|------------|------------|
| TSPAN6    | ENSG00000000003 | protein_coding | 3475.62172 | -1.2610769     | 0.07506917 | -16.798864 | 2.4876E-63 | 9.4088E-62 |
| CYP51A1   | ENSG00000001630 | protein_coding | 218.048511 | -1.1549351     | 0.12013032 | -9.6140188 | 6.9771E-22 | 4.5162E-21 |
| HECW1     | ENSG00000002746 | protein_coding | 240.483871 | -3.7260308     | 0.22427325 | -16.613799 | 5.5372E-62 | 1.9893E-60 |
| KLHL13    | ENSG00000003096 | protein_coding | 963.861954 | -2.1759814     | 0.11826271 | -18.399556 | 1.3245E-75 | 7.8748E-74 |
| CYP26B1   | ENSG00000003137 | protein_coding | 557.075127 | -1.6510987     | 0.14803281 | -11.153599 | 6.8767E-29 | 6.4704E-28 |
| HSPB6     | ENSG00000004776 | protein_coding | 776.118121 | -1.0334148     | 0.20962379 | -4.9298543 | 8.2291E-07 | 1.8986E-06 |
| SLC4A1    | ENSG00000004939 | protein_coding | 3212.85211 | -3.203467      | 0.40223074 | -7.9642521 | 1.6623E-15 | 7.388E-15  |
| PRSS22    | ENSG00000005001 | protein_coding | 71.0558965 | -3.2079894     | 0.3457506  | -9.2783336 | 1.7215E-20 | 1.0327E-19 |
| SLC25A5   | ENSG00000005022 | protein_coding | 14443.0941 | -1.1376125     | 0.12108368 | -9.3952593 | 5.7077E-21 | 3.5092E-20 |
| HOXA11    | ENSG00000005073 | protein_coding | 132.757838 | -1.43904       | 0.15954162 | -9.0198409 | 1.8836E-19 | 1.0656E-18 |
| THSD7A    | ENSG00000005108 | protein_coding | 2576.47978 | -1.6259675     | 0.16340926 | -9.9502773 | 2.5148E-23 | 1.7525E-22 |
| ACSM3     | ENSG00000005187 | protein_coding | 1991.53973 | -1.4444049     | 0.11783616 | -12.257738 | 1.527E-34  | 1.8792E-33 |
| PRKAR2B   | ENSG00000005249 | protein_coding | 557.834414 | -2.2400543     | 0.10544823 | -21.243167 | 3.813E-100 | 5.6751E-98 |
| PON1      | ENSG00000005421 | protein_coding | 9.02408227 | -1.5785287     | 0.24477575 | -6.448877  | 1.1268E-10 | 3.573E-10  |
| CROT      | ENSG00000005469 | protein_coding | 1197.89884 | -1.2617788     | 0.06911751 | -18.25556  | 1.8688E-74 | 1.0655E-72 |
| TAC1      | ENSG00000006128 | protein_coding | 22.7757793 | -2.913045      | 0.41974404 | -6.9400508 | 3.9196E-12 | 1.382E-11  |
| MAP3K9    | ENSG00000006432 | protein_coding | 366.595079 | -1.6688068     | 0.1402381  | -11.89981  | 1.1862E-32 | 1.3324E-31 |
| SCIN      | ENSG00000006747 | protein_coding | 5241.54162 | -1.9995735     | 0.21734398 | -9.2000409 | 3.5781E-20 | 2.105E-19  |
| UPP2      | ENSG00000007001 | protein_coding | 273.254849 | -4.3285609     | 0.21193124 | -20.424364 | 1.0157E-92 | 1.1554E-90 |
| PROM1     | ENSG00000007062 | protein_coding | 5085.1008  | -1.2032131     | 0.28887136 | -4.1652212 | 3.1105E-05 | 6.1724E-05 |
| SLC13A2   | ENSG00000007216 | protein_coding | 561.57762  | -4.7243168     | 0.36234218 | -13.038275 | 7.4115E-39 | 1.1006E-37 |
| CEACAM7   | ENSG00000007306 | protein_coding | 4.1317355  | -2.4948436     | 0.44968092 | -5.5480308 | 2.889E-08  | 7.548E-08  |
| CACNA2D2  | ENSG00000007402 | protein_coding | 179.326796 | -2.3019838     | 0.10766792 | -21.380407 | 2.033E-101 | 3.237E-99  |

|         |                 |                |            |            |            |            |            |            |
|---------|-----------------|----------------|------------|------------|------------|------------|------------|------------|
| BAIAP3  | ENSG00000007516 | protein_coding | 614.650464 | -1.1287943 | 0.11746198 | -9.6098701 | 7.2641E-22 | 4.6966E-21 |
| SELE    | ENSG00000007908 | protein_coding | 383.072739 | -1.8406391 | 0.18607554 | -9.8918917 | 4.5142E-23 | 3.1071E-22 |
| DNAJC11 | ENSG00000007923 | protein_coding | 2195.96748 | -1.3323372 | 0.0628019  | -21.214917 | 6.955E-100 | 1.0285E-97 |
| TFAP2B  | ENSG00000008196 | protein_coding | 310.852804 | -5.757358  | 0.34772344 | -16.557291 | 1.4184E-61 | 5.0248E-60 |
| IYD     | ENSG00000009765 | protein_coding | 463.059091 | -4.2889404 | 0.23828251 | -17.999393 | 1.9697E-72 | 1.0343E-70 |
| UQCRC1  | ENSG00000010256 | protein_coding | 8763.14891 | -1.0334484 | 0.10204214 | -10.127663 | 4.1648E-24 | 3.029E-23  |
| SEMA3G  | ENSG00000010319 | protein_coding | 2118.95287 | -1.6345071 | 0.14856854 | -11.001704 | 3.7498E-28 | 3.3931E-27 |
| PRSS3   | ENSG00000010438 | protein_coding | 39.8658314 | -1.7152315 | 0.32163268 | -5.3328896 | 9.6662E-08 | 2.4196E-07 |
| SYT7    | ENSG00000011347 | protein_coding | 471.433638 | -3.3362493 | 0.24643669 | -13.537957 | 9.3349E-42 | 1.5612E-40 |
| LARS2   | ENSG00000011376 | protein_coding | 1214.17319 | -1.397772  | 0.0929577  | -15.036646 | 4.2242E-51 | 1.0428E-49 |
| DCN     | ENSG00000011465 | protein_coding | 7575.80191 | -2.5451807 | 0.24289403 | -10.478564 | 1.0838E-25 | 8.6372E-25 |
| SEMA3B  | ENSG00000012171 | protein_coding | 1887.1814  | -1.3304514 | 0.16822955 | -7.9085471 | 2.6041E-15 | 1.1418E-14 |
| EHD3    | ENSG00000013016 | protein_coding | 2321.58928 | -1.2868147 | 0.10646099 | -12.087194 | 1.2343E-33 | 1.4579E-32 |
| SLC7A14 | ENSG00000013293 | protein_coding | 11.0057888 | -2.9722083 | 0.30364305 | -9.7884944 | 1.2616E-22 | 8.4874E-22 |
| CLDN11  | ENSG00000013297 | protein_coding | 215.786353 | -2.4718164 | 0.17802415 | -13.884725 | 7.84E-44   | 1.4399E-42 |
| POLR3B  | ENSG00000013503 | protein_coding | 644.356928 | -1.2228111 | 0.06863321 | -17.816611 | 5.2524E-71 | 2.6401E-69 |
| GPRC5A  | ENSG00000013588 | protein_coding | 1567.07351 | -1.4640125 | 0.25137716 | -5.8239677 | 5.7467E-09 | 1.5916E-08 |
| ACP3    | ENSG00000014257 | protein_coding | 431.306283 | -5.5897135 | 0.16850153 | -33.173072 | 2.633E-241 | 1.509E-237 |
| DPEP1   | ENSG00000015413 | protein_coding | 2295.18951 | -4.3941969 | 0.26494619 | -16.585243 | 8.9105E-62 | 3.1812E-60 |
| CHDH    | ENSG00000016391 | protein_coding | 3552.98452 | -1.3238573 | 0.12608515 | -10.499709 | 8.6647E-26 | 6.938E-25  |
| IL20RA  | ENSG00000016402 | protein_coding | 33.3155005 | -1.0110084 | 0.29629117 | -3.4122125 | 0.00064438 | 0.00111074 |
| RALBP1  | ENSG00000017797 | protein_coding | 4927.4964  | -1.474413  | 0.05955992 | -24.755119 | 2.731E-135 | 1.204E-132 |
| CNTN1   | ENSG00000018236 | protein_coding | 432.817949 | -3.6791906 | 0.28698202 | -12.820283 | 1.2624E-37 | 1.7911E-36 |
| CYP24A1 | ENSG00000019186 | protein_coding | 791.143313 | -1.3559382 | 0.32466698 | -4.176397  | 2.9616E-05 | 5.89E-05   |
| PLEKHB1 | ENSG00000021300 | protein_coding | 564.351303 | -2.3112898 | 0.177082   | -13.052088 | 6.183E-39  | 9.2349E-38 |

|         |                 |                |            |            |            |            |            |            |
|---------|-----------------|----------------|------------|------------|------------|------------|------------|------------|
| SLC7A9  | ENSG00000021488 | protein_coding | 1175.11292 | -1.4100475 | 0.19290362 | -7.309596  | 2.6795E-13 | 1.0247E-12 |
| NLRP2   | ENSG00000022556 | protein_coding | 183.234044 | -1.6397576 | 0.22340341 | -7.3398952 | 2.1376E-13 | 8.2317E-13 |
| GRAMD1B | ENSG00000023171 | protein_coding | 915.380974 | -1.2777829 | 0.14090247 | -9.0685629 | 1.206E-19  | 6.8957E-19 |
| NDUFS1  | ENSG00000023228 | protein_coding | 7366.49872 | -1.1976215 | 0.07723309 | -15.506585 | 3.131E-54  | 8.6514E-53 |
| ALAS1   | ENSG00000023330 | protein_coding | 2346.55881 | -1.0089044 | 0.08880562 | -11.360817 | 6.5529E-30 | 6.4656E-29 |
| INSRR   | ENSG00000027644 | protein_coding | 61.5782316 | -3.6139611 | 0.28210227 | -12.810819 | 1.4262E-37 | 2.0216E-36 |
| USP2    | ENSG00000036672 | protein_coding | 2051.29596 | -1.8596071 | 0.17336589 | -10.726488 | 7.6447E-27 | 6.4764E-26 |
| CASR    | ENSG00000036828 | protein_coding | 1057.67192 | -5.5201586 | 0.28766208 | -19.189733 | 4.5095E-82 | 3.3558E-80 |
| CDH1    | ENSG00000039068 | protein_coding | 8243.88498 | -1.45857   | 0.14015635 | -10.406735 | 2.3101E-25 | 1.8062E-24 |
| SOX30   | ENSG00000039600 | protein_coding | 20.417228  | -1.9767144 | 0.14886064 | -13.278959 | 3.0663E-40 | 4.8319E-39 |
| CDH10   | ENSG00000040731 | protein_coding | 7.29801474 | -1.7643037 | 0.30266553 | -5.8292193 | 5.5687E-09 | 1.5446E-08 |
| TNC     | ENSG00000041982 | protein_coding | 9331.37169 | -1.054191  | 0.16959861 | -6.2157998 | 5.1064E-10 | 1.5439E-09 |
| ZBPB    | ENSG00000042813 | protein_coding | 2.74446781 | -2.910986  | 0.27400168 | -10.623972 | 2.3054E-26 | 1.9025E-25 |
| ADRB1   | ENSG00000043591 | protein_coding | 56.4387347 | -1.4778245 | 0.25656812 | -5.7599692 | 8.4129E-09 | 2.2979E-08 |
| GPM6B   | ENSG00000046653 | protein_coding | 391.084925 | -2.1019957 | 0.1503728  | -13.978563 | 2.107E-44  | 3.9552E-43 |
| ATP6V1H | ENSG00000047249 | protein_coding | 3319.89908 | -1.1584321 | 0.08462436 | -13.689109 | 1.1795E-42 | 2.0605E-41 |
| XK      | ENSG00000047597 | protein_coding | 105.054948 | -1.8660872 | 0.21876774 | -8.5299927 | 1.4636E-17 | 7.402E-17  |
| FAM184B | ENSG00000047662 | protein_coding | 57.0514966 | -1.3592357 | 0.19856577 | -6.845267  | 7.6333E-12 | 2.6365E-11 |
| ROS1    | ENSG00000047936 | protein_coding | 53.7489479 | -2.4301939 | 0.44956549 | -5.4056505 | 6.4574E-08 | 1.641E-07  |
| LMO3    | ENSG00000048540 | protein_coding | 177.097736 | -3.3590158 | 0.18441761 | -18.214181 | 3.9833E-74 | 2.2405E-72 |
| VPS13D  | ENSG00000048707 | protein_coding | 4410.1452  | -1.0184574 | 0.07959438 | -12.795595 | 1.7352E-37 | 2.4505E-36 |
| COL9A2  | ENSG00000049089 | protein_coding | 506.697012 | -2.2014223 | 0.16745759 | -13.146148 | 1.7907E-39 | 2.7398E-38 |
| KITLG   | ENSG00000049130 | protein_coding | 3020.35382 | -1.6259503 | 0.13153438 | -12.361409 | 4.2268E-35 | 5.3348E-34 |
| EPN3    | ENSG00000049283 | protein_coding | 253.637545 | -3.7433633 | 0.29999228 | -12.478199 | 9.8183E-36 | 1.279E-34  |
| NEDD4L  | ENSG00000049759 | protein_coding | 6888.02128 | -1.0218871 | 0.13049725 | -7.8307177 | 4.8509E-15 | 2.0888E-14 |

|        |                 |                |            |            |            |            |            |            |
|--------|-----------------|----------------|------------|------------|------------|------------|------------|------------|
| NEXMIF | ENSG00000050030 | protein_coding | 130.649391 | -2.9441894 | 0.25561431 | -11.518093 | 1.0695E-30 | 1.0924E-29 |
| SLC4A8 | ENSG00000050438 | protein_coding | 213.874439 | -2.7129605 | 0.11252076 | -24.110755 | 1.928E-128 | 6.905E-126 |
| PTGER3 | ENSG00000050628 | protein_coding | 6564.27589 | -2.1109418 | 0.2139579  | -9.8661551 | 5.8359E-23 | 3.9863E-22 |
| PRSS8  | ENSG00000052344 | protein_coding | 3041.87372 | -1.6923839 | 0.16021766 | -10.56303  | 4.4216E-26 | 3.5944E-25 |
| FSTL4  | ENSG00000053108 | protein_coding | 119.447683 | -2.5506239 | 0.21604508 | -11.80598  | 3.6353E-32 | 4.003E-31  |
| AP5M1  | ENSG00000053770 | protein_coding | 2688.59979 | -1.0589677 | 0.08151139 | -12.991653 | 1.3645E-38 | 2.0054E-37 |
| KCNQ1  | ENSG00000053918 | protein_coding | 1904.0066  | -1.8520696 | 0.12877123 | -14.382635 | 6.6513E-47 | 1.3834E-45 |
| FOXC1  | ENSG00000054598 | protein_coding | 1480.36499 | -2.1812896 | 0.10745587 | -20.299399 | 1.3017E-91 | 1.3877E-89 |
| SYNE2  | ENSG00000054654 | protein_coding | 13452.054  | -1.183013  | 0.08825327 | -13.40475  | 5.6714E-41 | 9.216E-40  |
| CYFIP2 | ENSG00000055163 | protein_coding | 16179.0113 | -2.2680604 | 0.1065759  | -21.281175 | 1.696E-100 | 2.575E-98  |
| MCOLN3 | ENSG00000055732 | protein_coding | 217.214448 | -1.4202454 | 0.25002882 | -5.6803265 | 1.3444E-08 | 3.6145E-08 |
| NPFFR2 | ENSG00000056291 | protein_coding | 6.84088807 | -1.0644403 | 0.31181976 | -3.4136399 | 0.00064101 | 0.0011051  |
| PHF21B | ENSG00000056487 | protein_coding | 24.4833326 | -2.2629931 | 0.27975245 | -8.08927   | 6.0023E-16 | 2.7388E-15 |
| GYG2   | ENSG00000056998 | protein_coding | 134.152128 | -1.2392531 | 0.26641554 | -4.6515796 | 3.294E-06  | 7.1827E-06 |
| LAMC2  | ENSG00000058085 | protein_coding | 1471.33584 | -1.5575323 | 0.22564355 | -6.9026227 | 5.1051E-12 | 1.7844E-11 |
| STYK1  | ENSG00000060140 | protein_coding | 39.1124913 | -1.7365369 | 0.16497036 | -10.526357 | 6.5313E-26 | 5.2573E-25 |
| WNK1   | ENSG00000060237 | protein_coding | 12306.2743 | -1.5377315 | 0.07226572 | -21.27885  | 1.783E-100 | 2.6969E-98 |
| RIMBP2 | ENSG00000060709 | protein_coding | 74.658845  | -3.4538417 | 0.21024983 | -16.427322 | 1.2193E-60 | 4.2246E-59 |
| MPC1   | ENSG00000060762 | protein_coding | 3229.08967 | -1.53763   | 0.1200302  | -12.810359 | 1.4347E-37 | 2.033E-36  |
| ACAA1  | ENSG00000060971 | protein_coding | 3513.19563 | -1.6309236 | 0.07768298 | -20.994606 | 7.3469E-98 | 1.0144E-95 |
| CDH3   | ENSG00000062038 | protein_coding | 472.289149 | -2.2391142 | 0.25127892 | -8.9108714 | 5.0633E-19 | 2.7951E-18 |
| SPHK2  | ENSG00000063176 | protein_coding | 788.698907 | -1.2079869 | 0.06847813 | -17.640476 | 1.2044E-69 | 5.7333E-68 |
| DLX3   | ENSG00000064195 | protein_coding | 21.1914308 | -2.2393729 | 0.18110234 | -12.365235 | 4.0303E-35 | 5.0897E-34 |
| ATP2C2 | ENSG00000064270 | protein_coding | 90.9803457 | -1.9224666 | 0.21830693 | -8.8062556 | 1.294E-18  | 6.9776E-18 |
| EYA2   | ENSG00000064655 | protein_coding | 255.808376 | -1.304156  | 0.16809854 | -7.7582831 | 8.6087E-15 | 3.6455E-14 |

|            |                 |                |            |            |            |            |            |            |
|------------|-----------------|----------------|------------|------------|------------|------------|------------|------------|
| BCAS1      | ENSG00000064787 | protein_coding | 178.201318 | -1.9768697 | 0.28497497 | -6.9369942 | 4.0053E-12 | 1.4113E-11 |
| OAT        | ENSG00000065154 | protein_coding | 3378.17757 | -1.2080854 | 0.07875536 | -15.339724 | 4.1496E-53 | 1.1066E-51 |
| GSTO2      | ENSG00000065621 | protein_coding | 622.993695 | -1.7853638 | 0.17656849 | -10.111452 | 4.915E-24  | 3.5611E-23 |
| PRKCQ      | ENSG00000065675 | protein_coding | 622.532373 | -1.6834531 | 0.12374964 | -13.603701 | 3.8067E-42 | 6.4847E-41 |
| ZMYND12    | ENSG00000066185 | protein_coding | 253.309343 | -1.3408039 | 0.11106302 | -12.07246  | 1.4765E-33 | 1.736E-32  |
| SLC9A3     | ENSG00000066230 | protein_coding | 1810.49962 | -3.5022155 | 0.23631797 | -14.819929 | 1.089E-49  | 2.5483E-48 |
| MPPED2     | ENSG00000066382 | protein_coding | 436.034868 | -2.449614  | 0.17833756 | -13.735828 | 6.1944E-43 | 1.0981E-41 |
| FGFR2      | ENSG00000066468 | protein_coding | 2450.89037 | -1.2785616 | 0.12184329 | -10.493492 | 9.2544E-26 | 7.4011E-25 |
| FECH       | ENSG00000066926 | protein_coding | 2261.15922 | -1.9770529 | 0.06895303 | -28.672457 | 8.415E-181 | 1.378E-177 |
| IDI1       | ENSG00000067064 | protein_coding | 1987.99389 | -1.025856  | 0.06361284 | -16.126556 | 1.6602E-58 | 5.3521E-57 |
| SYT1       | ENSG00000067715 | protein_coding | 119.139022 | -2.2378004 | 0.22583205 | -9.9091358 | 3.7992E-23 | 2.6233E-22 |
| ATP2B3     | ENSG00000067842 | protein_coding | 22.5730608 | -2.4556099 | 0.34207892 | -7.1784893 | 7.0486E-13 | 2.6214E-12 |
| ACSL4      | ENSG00000068366 | protein_coding | 5970.79071 | -1.5137833 | 0.0851055  | -17.787137 | 8.8908E-71 | 4.4109E-69 |
| TRPC7      | ENSG00000069018 | protein_coding | 30.2534144 | -1.6671622 | 0.24430661 | -6.8240568 | 8.8505E-12 | 3.0441E-11 |
| GAL        | ENSG00000069482 | protein_coding | 6.89975607 | -1.5096474 | 0.30846823 | -4.8940126 | 9.8801E-07 | 2.2607E-06 |
| TGFBR3     | ENSG00000069702 | protein_coding | 3304.76421 | -1.628549  | 0.09286167 | -17.537366 | 7.4292E-69 | 3.4227E-67 |
| PFN2       | ENSG00000070087 | protein_coding | 5411.43022 | -1.0861233 | 0.14348885 | -7.5693916 | 3.7498E-14 | 1.5196E-13 |
| PTPN3      | ENSG00000070159 | protein_coding | 3787.40573 | -1.2607155 | 0.11135912 | -11.32117  | 1.0309E-29 | 1.008E-28  |
| SPTB       | ENSG00000070182 | protein_coding | 200.574884 | -2.6604368 | 0.14799995 | -17.975931 | 3.0077E-72 | 1.5704E-70 |
| FGF10      | ENSG00000070193 | protein_coding | 11.8346712 | -3.4444352 | 0.31648638 | -10.88336  | 1.3837E-27 | 1.2142E-26 |
| ST6GALNAC2 | ENSG00000070731 | protein_coding | 478.669045 | -1.4739616 | 0.16741082 | -8.8044582 | 1.3149E-18 | 7.0886E-18 |
| CAMK2A     | ENSG00000070808 | protein_coding | 35.3928092 | -2.7682334 | 0.22135014 | -12.506129 | 6.9111E-36 | 9.0621E-35 |
| SLC12A3    | ENSG00000070915 | protein_coding | 4149.7429  | -4.7545935 | 0.38374672 | -12.389926 | 2.9632E-35 | 3.7721E-34 |
| TRPM5      | ENSG00000070985 | protein_coding | 7.12240017 | -2.1124266 | 0.22512236 | -9.3834596 | 6.3843E-21 | 3.9126E-20 |
| MYO3B      | ENSG00000071909 | protein_coding | 438.489393 | -3.7521074 | 0.26023026 | -14.418413 | 3.9635E-47 | 8.3306E-46 |

|         |                 |                |            |            |            |            |            |            |
|---------|-----------------|----------------|------------|------------|------------|------------|------------|------------|
| CDH19   | ENSG00000071991 | protein_coding | 24.2136567 | -2.082272  | 0.39401085 | -5.2848089 | 1.2584E-07 | 3.1186E-07 |
| ADGRL1  | ENSG00000072071 | protein_coding | 1308.19991 | -1.0038358 | 0.11043679 | -9.0896867 | 9.9325E-20 | 5.7043E-19 |
| RPS6KA6 | ENSG00000072133 | protein_coding | 564.725766 | -2.9768291 | 0.21587497 | -13.789598 | 2.9439E-43 | 5.2778E-42 |
| LNX1    | ENSG00000072201 | protein_coding | 987.500289 | -1.5100079 | 0.11634474 | -12.978738 | 1.6152E-38 | 2.3678E-37 |
| TRPC5   | ENSG00000072315 | protein_coding | 5.29596249 | -1.53462   | 0.24750476 | -6.2003655 | 5.6332E-10 | 1.6972E-09 |
| MPP5    | ENSG00000072415 | protein_coding | 2837.30336 | -1.3864279 | 0.08149974 | -17.011441 | 6.7556E-65 | 2.707E-63  |
| EVC     | ENSG00000072840 | protein_coding | 4609.71214 | -1.2110279 | 0.11696273 | -10.353964 | 4.0151E-25 | 3.0913E-24 |
| LLGL2   | ENSG00000073350 | protein_coding | 3021.25157 | -1.2519491 | 0.0942174  | -13.287876 | 2.722E-40  | 4.2982E-39 |
| PTGS2   | ENSG00000073756 | protein_coding | 891.166668 | -1.1144468 | 0.22383923 | -4.9787822 | 6.3986E-07 | 1.492E-06  |
| IGF2BP2 | ENSG00000073792 | protein_coding | 448.791571 | -1.0062424 | 0.23218919 | -4.3337175 | 1.4661E-05 | 3.0032E-05 |
| ST6GAL1 | ENSG00000073849 | protein_coding | 10235.5658 | -2.1721399 | 0.12712112 | -17.087168 | 1.8494E-65 | 7.5359E-64 |
| FRY     | ENSG00000073910 | protein_coding | 2879.19716 | -1.1720143 | 0.09751606 | -12.018681 | 2.8346E-33 | 3.288E-32  |
| NTN4    | ENSG00000074527 | protein_coding | 8511.13119 | -1.6623052 | 0.12304776 | -13.509431 | 1.3758E-41 | 2.2926E-40 |
| HACD3   | ENSG00000074696 | protein_coding | 6270.38885 | -1.3846317 | 0.10500275 | -13.186623 | 1.0477E-39 | 1.615E-38  |
| IPCEF1  | ENSG00000074706 | protein_coding | 451.492389 | -1.0189304 | 0.11479494 | -8.8760919 | 6.9251E-19 | 3.7964E-18 |
| SLC12A1 | ENSG00000074803 | protein_coding | 22201.1143 | -8.2764291 | 0.33238901 | -24.899828 | 7.472E-137 | 3.495E-134 |
| WSCD2   | ENSG00000075035 | protein_coding | 91.5201442 | -2.2353638 | 0.25873053 | -8.6397372 | 5.6342E-18 | 2.9247E-17 |
| KCNQ2   | ENSG00000075043 | protein_coding | 5.48824434 | -2.5979027 | 0.30065075 | -8.6409321 | 5.5756E-18 | 2.8946E-17 |
| ACAT1   | ENSG00000075239 | protein_coding | 10957.459  | -1.2117407 | 0.13662721 | -8.8689555 | 7.3835E-19 | 4.0404E-18 |
| WNT8B   | ENSG00000075290 | protein_coding | 14.3596141 | -3.9453601 | 0.17286362 | -22.823542 | 2.677E-115 | 6.392E-113 |
| FGF4    | ENSG00000075388 | protein_coding | 0.64665998 | -2.0230848 | 0.59683246 | -3.389703  | 0.00069968 | 0.00120088 |
| ATP12A  | ENSG00000075673 | protein_coding | 138.350225 | -7.2362811 | 0.32976195 | -21.943954 | 9.892E-107 | 1.897E-104 |
| FMO4    | ENSG00000076258 | protein_coding | 899.939802 | -1.3966283 | 0.09511526 | -14.683535 | 8.2191E-49 | 1.8569E-47 |
| RAP1GAP | ENSG00000076864 | protein_coding | 4782.45904 | -2.5650022 | 0.17474116 | -14.678867 | 8.805E-49  | 1.9873E-47 |
| CAPN6   | ENSG00000077274 | protein_coding | 1347.70036 | -1.2890442 | 0.27835341 | -4.6309626 | 3.6397E-06 | 7.9022E-06 |



|         |                 |                |            |            |            |            |            |            |
|---------|-----------------|----------------|------------|------------|------------|------------|------------|------------|
| FBLN1   | ENSG00000077942 | protein_coding | 2833.71881 | -1.548122  | 0.1831219  | -8.4540515 | 2.8137E-17 | 1.3991E-16 |
| AMPH    | ENSG00000078053 | protein_coding | 123.482612 | -3.1571289 | 0.18502776 | -17.063002 | 2.798E-65  | 1.1341E-63 |
| MCCC1   | ENSG00000078070 | protein_coding | 2254.74828 | -1.0819938 | 0.07830506 | -13.817674 | 1.9941E-43 | 3.6046E-42 |
| NEBL    | ENSG00000078114 | protein_coding | 4522.5276  | -1.5045562 | 0.13168224 | -11.425658 | 3.1129E-30 | 3.115E-29  |
| RBFOX1  | ENSG00000078328 | protein_coding | 13.817469  | -2.3613465 | 0.29769286 | -7.9321568 | 2.1537E-15 | 9.4995E-15 |
| CLUL1   | ENSG00000079101 | protein_coding | 86.5461277 | -3.4591118 | 0.14623909 | -23.653811 | 1.078E-123 | 3.363E-121 |
| OSBPL6  | ENSG00000079156 | protein_coding | 125.960406 | -1.3975382 | 0.16596242 | -8.4208117 | 3.7388E-17 | 1.8433E-16 |
| RAPGEF3 | ENSG00000079337 | protein_coding | 2001.30188 | -1.7453769 | 0.11333821 | -15.399722 | 1.6437E-53 | 4.4507E-52 |
| CEACAM1 | ENSG00000079385 | protein_coding | 1548.50107 | -1.180805  | 0.12034198 | -9.8120786 | 9.9889E-23 | 6.7527E-22 |
| FDFT1   | ENSG00000079459 | protein_coding | 3882.37744 | -1.0097738 | 0.07045025 | -14.333147 | 1.3582E-46 | 2.7908E-45 |
| OPHN1   | ENSG00000079482 | protein_coding | 631.890103 | -1.6819626 | 0.08512926 | -19.757749 | 6.8805E-87 | 6.1364E-85 |
| AFM     | ENSG00000079557 | protein_coding | 288.591623 | -4.6944688 | 0.29967684 | -15.665104 | 2.62E-55   | 7.53E-54   |
| CARMIL1 | ENSG00000079691 | protein_coding | 1587.56166 | -1.4794801 | 0.06864481 | -21.552687 | 4.996E-103 | 8.546E-101 |
| MOXD1   | ENSG00000079931 | protein_coding | 1260.26076 | -2.2851855 | 0.20958163 | -10.903558 | 1.1084E-27 | 9.7972E-27 |
| SCTR    | ENSG00000080293 | protein_coding | 412.759487 | -1.425034  | 0.15062441 | -9.4608438 | 3.0547E-21 | 1.9088E-20 |
| RDH8    | ENSG00000080511 | protein_coding | 16.5071131 | -3.8384738 | 0.44487328 | -8.6282408 | 6.2303E-18 | 3.221E-17  |
| DNAAF6  | ENSG00000080572 | protein_coding | 1.13918795 | -1.1511879 | 0.21433965 | -5.3708583 | 7.8363E-08 | 1.9786E-07 |
| MAGI3   | ENSG00000081026 | protein_coding | 936.305944 | -1.7882034 | 0.11882069 | -15.049596 | 3.4735E-51 | 8.6162E-50 |
| AFP     | ENSG00000081051 | protein_coding | 42.816704  | -2.3377555 | 0.25733168 | -9.0846006 | 1.0408E-19 | 5.9744E-19 |
| COL4A4  | ENSG00000081052 | protein_coding | 2062.27453 | -2.1289719 | 0.13415969 | -15.868938 | 1.0399E-56 | 3.1278E-55 |
| IMPG2   | ENSG00000081148 | protein_coding | 46.6334157 | -1.3830046 | 0.11485349 | -12.041467 | 2.151E-33  | 2.5058E-32 |
| ARG2    | ENSG00000081181 | protein_coding | 1819.05733 | -1.9078068 | 0.22339008 | -8.5402483 | 1.3393E-17 | 6.7861E-17 |
| CACNA1S | ENSG00000081248 | protein_coding | 19.3336973 | -2.0838233 | 0.21240948 | -9.8104059 | 1.0156E-22 | 6.8636E-22 |
| SLC13A1 | ENSG00000081800 | protein_coding | 2492.86583 | -1.3140513 | 0.28877352 | -4.5504563 | 5.353E-06  | 1.1436E-05 |
| CADPS2  | ENSG00000081803 | protein_coding | 2697.11662 | -1.5952717 | 0.0776612  | -20.541424 | 9.1831E-94 | 1.0906E-91 |

|         |                 |                |            |            |            |            |            |            |
|---------|-----------------|----------------|------------|------------|------------|------------|------------|------------|
| ATP8B1  | ENSG00000081923 | protein_coding | 1910.60758 | -1.2399427 | 0.10292449 | -12.04711  | 2.0087E-33 | 2.3454E-32 |
| COL19A1 | ENSG00000082293 | protein_coding | 66.0709288 | -1.280356  | 0.22313062 | -5.7381455 | 9.5719E-09 | 2.6038E-08 |
| COBLL1  | ENSG00000082438 | protein_coding | 6085.35642 | -2.3893878 | 0.10908499 | -21.903909 | 2.384E-106 | 4.516E-104 |
| TRPM3   | ENSG00000083067 | protein_coding | 1259.47585 | -1.1629265 | 0.18797009 | -6.1867635 | 6.1412E-10 | 1.8443E-09 |
| BCKDHB  | ENSG00000083123 | protein_coding | 1234.57254 | -1.2714983 | 0.09991566 | -12.725716 | 4.2556E-37 | 5.9115E-36 |
| GRHL2   | ENSG00000083307 | protein_coding | 297.506631 | -3.6914079 | 0.34766721 | -10.617647 | 2.467E-26  | 2.0314E-25 |
| OXCT1   | ENSG00000083720 | protein_coding | 3763.04619 | -1.2094524 | 0.2017999  | -5.9933251 | 2.0559E-09 | 5.9181E-09 |
| SLCO1A2 | ENSG00000084453 | protein_coding | 71.383344  | -2.2332386 | 0.35667391 | -6.2612895 | 3.8181E-10 | 1.1652E-09 |
| CD82    | ENSG00000085117 | protein_coding | 2727.65258 | -1.3627238 | 0.14508216 | -9.3927731 | 5.8441E-21 | 3.5916E-20 |
| MECOM   | ENSG00000085276 | protein_coding | 3666.9104  | -2.5507379 | 0.1309242  | -19.482555 | 1.5438E-84 | 1.2615E-82 |
| IGSF9   | ENSG00000085552 | protein_coding | 55.2077374 | -1.5641245 | 0.21975272 | -7.1176567 | 1.0978E-12 | 4.0291E-12 |
| ABCB1   | ENSG00000085563 | protein_coding | 2943.62683 | -1.709443  | 0.1639841  | -10.424444 | 1.9178E-25 | 1.5067E-24 |
| WNT11   | ENSG00000085741 | protein_coding | 81.5065361 | -1.4182032 | 0.23507809 | -6.0329026 | 1.6104E-09 | 4.6738E-09 |
| AQP6    | ENSG00000086159 | protein_coding | 1308.58088 | -2.7119194 | 0.43544681 | -6.2279006 | 4.7273E-10 | 1.4339E-09 |
| FAT2    | ENSG00000086570 | protein_coding | 117.715868 | -1.807043  | 0.17609839 | -10.261553 | 1.05E-24   | 7.9104E-24 |
| NOX4    | ENSG00000086991 | protein_coding | 2483.64325 | -1.3236347 | 0.15292479 | -8.6554623 | 4.9092E-18 | 2.5553E-17 |
| L2HGDH  | ENSG00000087299 | protein_coding | 844.810301 | -1.4292557 | 0.10437176 | -13.693893 | 1.1043E-42 | 1.9314E-41 |
| TFAP2C  | ENSG00000087510 | protein_coding | 97.8716461 | -2.0712557 | 0.30857281 | -6.7123728 | 1.9148E-11 | 6.4292E-11 |
| SULT2B1 | ENSG00000088002 | protein_coding | 106.363417 | -3.1505056 | 0.22994339 | -13.701223 | 9.9828E-43 | 1.752E-41  |
| PTPN4   | ENSG00000088179 | protein_coding | 1528.27899 | -1.2607981 | 0.07097481 | -17.764024 | 1.3426E-70 | 6.6248E-69 |
| ASAP3   | ENSG00000088280 | protein_coding | 1125.10543 | -1.1199274 | 0.10877668 | -10.295657 | 7.3715E-25 | 5.5817E-24 |
| DOCK3   | ENSG00000088538 | protein_coding | 87.2274905 | -1.098658  | 0.21105075 | -5.205658  | 1.9331E-07 | 4.7179E-07 |
| TMEM40  | ENSG00000088726 | protein_coding | 5.334068   | -1.0789117 | 0.21452818 | -5.0292309 | 4.9245E-07 | 1.1598E-06 |
| DEFB127 | ENSG00000088782 | protein_coding | 0.32157247 | -2.6794357 | 0.57981513 | -4.6211896 | 3.8155E-06 | 8.2658E-06 |
| SLC4A11 | ENSG00000088836 | protein_coding | 485.928166 | -4.4300408 | 0.18236575 | -24.292066 | 2.378E-130 | 9.083E-128 |



|          |                 |                |            |            |            |            |            |            |
|----------|-----------------|----------------|------------|------------|------------|------------|------------|------------|
| LZTS3    | ENSG00000088899 | protein_coding | 1362.09927 | -2.3076424 | 0.13093849 | -17.623866 | 1.6158E-69 | 7.6517E-68 |
| F11      | ENSG00000088926 | protein_coding | 297.826621 | -4.2354473 | 0.27632014 | -15.328044 | 4.9672E-53 | 1.3215E-51 |
| CFAP61   | ENSG00000089101 | protein_coding | 29.1640153 | -1.796884  | 0.14322835 | -12.545589 | 4.2028E-36 | 5.565E-35  |
| CHGB     | ENSG00000089199 | protein_coding | 369.678027 | -3.6243799 | 0.27340605 | -13.2564   | 4.1431E-40 | 6.4843E-39 |
| PEBP1    | ENSG00000089220 | protein_coding | 34442.7092 | -1.2064988 | 0.07913115 | -15.246825 | 1.7284E-52 | 4.5248E-51 |
| NOS1     | ENSG00000089250 | protein_coding | 197.970195 | -4.4347885 | 0.20777685 | -21.343997 | 4.434E-101 | 6.961E-99  |
| FETUB    | ENSG00000090512 | protein_coding | 8.24292519 | -1.6972878 | 0.43852484 | -3.8704486 | 0.00010864 | 0.0002038  |
| LAMB4    | ENSG00000091128 | protein_coding | 112.519542 | -1.3611739 | 0.22345128 | -6.0915913 | 1.1179E-09 | 3.2878E-09 |
| SLC26A4  | ENSG00000091137 | protein_coding | 230.458697 | -3.2698735 | 0.19693294 | -16.603995 | 6.5203E-62 | 2.3333E-60 |
| IL5RA    | ENSG00000091181 | protein_coding | 21.6650551 | -1.6529831 | 0.18412436 | -8.9775361 | 2.769E-19  | 1.5514E-18 |
| APOH     | ENSG00000091583 | protein_coding | 164.793109 | -2.5156108 | 0.30437258 | -8.264906  | 1.398E-16  | 6.6474E-16 |
| PITPNM3  | ENSG00000091622 | protein_coding | 222.872411 | -1.5106115 | 0.12369323 | -12.212565 | 2.6636E-34 | 3.2405E-33 |
| CPA1     | ENSG00000091704 | protein_coding | 8.91773981 | -2.8993539 | 0.24073852 | -12.043581 | 2.0965E-33 | 2.4455E-32 |
| JPH4     | ENSG00000092051 | protein_coding | 140.657938 | -1.6311528 | 0.11399818 | -14.308586 | 1.9341E-46 | 3.958E-45  |
| MYH7     | ENSG00000092054 | protein_coding | 5.83401426 | -3.128871  | 0.23379947 | -13.382712 | 7.6311E-41 | 1.2313E-39 |
| SLC7A8   | ENSG00000092068 | protein_coding | 3968.04798 | -3.5985589 | 0.18350689 | -19.609939 | 1.2718E-85 | 1.0857E-83 |
| DAZL     | ENSG00000092345 | protein_coding | 2.60542481 | -1.9798956 | 0.31837524 | -6.2187486 | 5.0114E-10 | 1.5161E-09 |
| TBL1Y    | ENSG00000092377 | protein_coding | 21.1858944 | -3.3659261 | 0.33229165 | -10.129433 | 4.0901E-24 | 2.9756E-23 |
| TYRO3    | ENSG00000092445 | protein_coding | 712.612066 | -2.2579763 | 0.12242151 | -18.444278 | 5.7968E-76 | 3.5196E-74 |
| PHGDH    | ENSG00000092621 | protein_coding | 2315.90498 | -1.4176971 | 0.16855936 | -8.41067   | 4.0768E-17 | 2.005E-16  |
| COL9A3   | ENSG00000092758 | protein_coding | 68.5434556 | -1.3426645 | 0.19220388 | -6.9856265 | 2.8359E-12 | 1.0104E-11 |
| XYLB     | ENSG00000093217 | protein_coding | 491.097647 | -1.0935237 | 0.1222922  | -8.9418927 | 3.8256E-19 | 2.1252E-18 |
| GABRP    | ENSG00000094755 | protein_coding | 180.309455 | -2.2095873 | 0.24817056 | -8.9035026 | 5.4111E-19 | 2.9828E-18 |
| EPB41L4B | ENSG00000095203 | protein_coding | 345.681355 | -3.3527502 | 0.2735819  | -12.255015 | 1.5792E-34 | 1.9424E-33 |
| BLNK     | ENSG00000095585 | protein_coding | 1052.0774  | -1.1183076 | 0.11312038 | -9.8859958 | 4.788E-23  | 3.2901E-22 |

|           |                 |                |            |            |            |            |            |            |
|-----------|-----------------|----------------|------------|------------|------------|------------|------------|------------|
| TDRD1     | ENSG00000095627 | protein_coding | 53.1522703 | -1.9346724 | 0.3131618  | -6.1778684 | 6.4973E-10 | 1.9472E-09 |
| IL11      | ENSG00000095752 | protein_coding | 43.9764985 | -3.350727  | 0.29455545 | -11.375539 | 5.536E-30  | 5.4752E-29 |
| SMIM24    | ENSG00000095932 | protein_coding | 7530.65699 | -1.3023612 | 0.18252394 | -7.1352899 | 9.6583E-13 | 3.5571E-12 |
| PGC       | ENSG00000096088 | protein_coding | 6.03553239 | -1.131026  | 0.29862038 | -3.7875044 | 0.00015217 | 0.00028092 |
| DSP       | ENSG00000096696 | protein_coding | 7240.88911 | -1.4462097 | 0.1658693  | -8.7189718 | 2.8074E-18 | 1.483E-17  |
| ABLIM1    | ENSG00000099204 | protein_coding | 10373.8305 | -1.0180056 | 0.0760995  | -13.377297 | 8.2078E-41 | 1.3216E-39 |
| ERMP1     | ENSG00000099219 | protein_coding | 4705.21953 | -2.4618815 | 0.10364805 | -23.752317 | 1.04E-124  | 3.357E-122 |
| MACROH2A2 | ENSG00000099284 | protein_coding | 669.121453 | -1.2231571 | 0.10818593 | -11.306065 | 1.2246E-29 | 1.1952E-28 |
| CBARP     | ENSG00000099625 | protein_coding | 48.2117071 | -1.4443567 | 0.1562173  | -9.2458176 | 2.3345E-20 | 1.3882E-19 |
| PCDH11Y   | ENSG00000099715 | protein_coding | 13.01595   | -1.7670157 | 0.2999114  | -5.8917925 | 3.8203E-09 | 1.0746E-08 |
| AMELY     | ENSG00000099721 | protein_coding | 0.70856686 | -3.7639745 | 0.43211176 | -8.7106504 | 3.0214E-18 | 1.5936E-17 |
| IGFALS    | ENSG00000099769 | protein_coding | 31.6073239 | -1.7276484 | 0.16515468 | -10.46079  | 1.3076E-25 | 1.0365E-24 |
| MISP      | ENSG00000099812 | protein_coding | 400.094941 | -1.6429746 | 0.2638233  | -6.2275569 | 4.7376E-10 | 1.4369E-09 |
| PALM      | ENSG00000099864 | protein_coding | 1794.29392 | -1.6159313 | 0.11343347 | -14.245631 | 4.7722E-46 | 9.5738E-45 |
| CECR2     | ENSG00000099954 | protein_coding | 88.3475816 | -1.4808055 | 0.21720074 | -6.8176817 | 9.2521E-12 | 3.1767E-11 |
| SLC7A4    | ENSG00000099960 | protein_coding | 15.1794054 | -2.025946  | 0.2673476  | -7.5779475 | 3.5106E-14 | 1.4259E-13 |
| SUSD2     | ENSG00000099994 | protein_coding | 2056.28661 | -1.5268115 | 0.15334641 | -9.956617  | 2.3596E-23 | 1.6463E-22 |
| PLA2G3    | ENSG00000100078 | protein_coding | 4.93555156 | -2.5938531 | 0.42775031 | -6.0639421 | 1.3283E-09 | 3.8787E-09 |
| GCAT      | ENSG00000100116 | protein_coding | 587.025865 | -1.0783456 | 0.13448089 | -8.0185788 | 1.0698E-15 | 4.8077E-15 |
| MIOX      | ENSG00000100253 | protein_coding | 6709.80334 | -2.3357673 | 0.23880602 | -9.7810235 | 1.3583E-22 | 9.1232E-22 |
| NEFH      | ENSG00000100285 | protein_coding | 65.3846396 | -1.2860185 | 0.12741777 | -10.092929 | 5.9371E-24 | 4.2793E-23 |
| BIK       | ENSG00000100290 | protein_coding | 48.9246298 | -1.2957791 | 0.18932943 | -6.844045  | 7.6988E-12 | 2.6585E-11 |
| SYNGR1    | ENSG00000100321 | protein_coding | 1332.12123 | -1.349738  | 0.12805146 | -10.54059  | 5.6145E-26 | 4.5425E-25 |
| PNPLA3    | ENSG00000100344 | protein_coding | 87.5147016 | -1.6285312 | 0.18619285 | -8.7464754 | 2.2012E-18 | 1.1698E-17 |
| KCNK10    | ENSG00000100433 | protein_coding | 72.162314  | -3.3544193 | 0.18264304 | -18.365985 | 2.4594E-75 | 1.4529E-73 |

|          |                 |                |            |            |            |            |            |            |
|----------|-----------------|----------------|------------|------------|------------|------------|------------|------------|
| COCH     | ENSG00000100473 | protein_coding | 91.2030022 | -1.177827  | 0.24727165 | -4.7632916 | 1.9046E-06 | 4.2453E-06 |
| CDKL1    | ENSG00000100490 | protein_coding | 451.723205 | -1.5680569 | 0.10509978 | -14.919698 | 2.4538E-50 | 5.8986E-49 |
| ISM2     | ENSG00000100593 | protein_coding | 69.0242678 | -1.4868485 | 0.28909695 | -5.1430792 | 2.7027E-07 | 6.5158E-07 |
| CHGA     | ENSG00000100604 | protein_coding | 20.9556754 | -2.6863609 | 0.27662447 | -9.7112194 | 2.7009E-22 | 1.783E-21  |
| SIX4     | ENSG00000100625 | protein_coding | 108.441624 | -2.2055322 | 0.26944514 | -8.1854594 | 2.7127E-16 | 1.2649E-15 |
| GALNT16  | ENSG00000100626 | protein_coding | 617.495898 | -1.0271492 | 0.15778131 | -6.509955  | 7.5173E-11 | 2.4178E-10 |
| HIF1A    | ENSG00000100644 | protein_coding | 11524.6176 | -1.1844885 | 0.09189348 | -12.889798 | 5.1378E-38 | 7.397E-37  |
| SERPINA4 | ENSG00000100665 | protein_coding | 124.602392 | -2.7977516 | 0.3269821  | -8.5562837 | 1.1656E-17 | 5.924E-17  |
| CPNE6    | ENSG00000100884 | protein_coding | 89.8949945 | -6.5806623 | 0.30536658 | -21.550041 | 5.29E-103  | 9.015E-101 |
| PCK2     | ENSG00000100889 | protein_coding | 3920.77711 | -2.3152718 | 0.11873565 | -19.499382 | 1.1112E-84 | 9.1779E-83 |
| DCAF11   | ENSG00000100897 | protein_coding | 4463.70568 | -1.1489834 | 0.05468221 | -21.012013 | 5.0929E-98 | 7.0962E-96 |
| REC8     | ENSG00000100918 | protein_coding | 502.137411 | -1.0319562 | 0.1376429  | -7.4973443 | 6.5124E-14 | 2.6027E-13 |
| NINL     | ENSG00000101004 | protein_coding | 1166.35778 | -1.2254987 | 0.08919895 | -13.738936 | 5.9341E-43 | 1.0527E-41 |
| SGK2     | ENSG00000101049 | protein_coding | 1498.10087 | -1.5287757 | 0.14741118 | -10.370826 | 3.366E-25  | 2.606E-24  |
| R3HDML   | ENSG00000101074 | protein_coding | 1.7700135  | -1.6789895 | 0.47020274 | -3.5707778 | 0.00035592 | 0.00063091 |
| RIMS4    | ENSG00000101098 | protein_coding | 10.5903286 | -1.593905  | 0.31368413 | -5.0812422 | 3.7497E-07 | 8.9244E-07 |
| BMP7     | ENSG00000101144 | protein_coding | 234.59468  | -3.1199417 | 0.35703806 | -8.7384008 | 2.3643E-18 | 1.2543E-17 |
| AVP      | ENSG00000101200 | protein_coding | 2.43063412 | -1.1686967 | 0.35326261 | -3.3082943 | 0.00093866 | 0.00158914 |
| CHRNA4   | ENSG00000101204 | protein_coding | 48.7910887 | -3.2252456 | 0.38084165 | -8.4687313 | 2.4808E-17 | 1.2369E-16 |
| SLC52A3  | ENSG00000101276 | protein_coding | 358.799025 | -2.9675249 | 0.18679976 | -15.886128 | 7.9063E-57 | 2.3891E-55 |
| PROKR2   | ENSG00000101292 | protein_coding | 3.89517465 | -1.1061895 | 0.34774382 | -3.1810471 | 0.00146744 | 0.00243111 |
| FERMT1   | ENSG00000101311 | protein_coding | 244.563683 | -1.3498304 | 0.20785166 | -6.494201  | 8.3475E-11 | 2.6752E-10 |
| HAO1     | ENSG00000101323 | protein_coding | 9.42677306 | -3.2733287 | 0.46673943 | -7.0131823 | 2.3296E-12 | 8.3495E-12 |
| PAK5     | ENSG00000101349 | protein_coding | 25.6670799 | -1.2353394 | 0.52877975 | -2.3362078 | 0.01948041 | 0.02798589 |
| BPI      | ENSG00000101425 | protein_coding | 42.2163604 | -2.4294456 | 0.18384953 | -13.214315 | 7.2544E-40 | 1.1227E-38 |

|          |                 |                |            |            |            |            |            |            |
|----------|-----------------|----------------|------------|------------|------------|------------|------------|------------|
| WFDC2    | ENSG00000101443 | protein_coding | 4826.52881 | -1.0920147 | 0.23527754 | -4.6413894 | 3.4607E-06 | 7.529E-06  |
| LPIN2    | ENSG00000101577 | protein_coding | 4466.15276 | -1.042995  | 0.06554022 | -15.913817 | 5.0819E-57 | 1.5448E-55 |
| LIPG     | ENSG00000101670 | protein_coding | 770.074579 | -1.5333906 | 0.17912872 | -8.5602722 | 1.126E-17  | 5.7283E-17 |
| CHRD1    | ENSG00000101938 | protein_coding | 649.375258 | -1.8087485 | 0.33353817 | -5.4229131 | 5.8636E-08 | 1.4959E-07 |
| PAGE4    | ENSG00000101951 | protein_coding | 2.08226189 | -3.5584689 | 0.44579634 | -7.9822748 | 1.4366E-15 | 6.4143E-15 |
| MCF2     | ENSG00000101977 | protein_coding | 44.6177194 | -1.2944336 | 0.165373   | -7.8273576 | 4.9823E-15 | 2.1439E-14 |
| SYP      | ENSG00000102003 | protein_coding | 184.797805 | -1.5628546 | 0.11406375 | -13.701589 | 9.9327E-43 | 1.7439E-41 |
| ASB9     | ENSG00000102048 | protein_coding | 378.127589 | -1.0924914 | 0.1055675  | -10.348748 | 4.24E-25   | 3.259E-24  |
| RS1      | ENSG00000102104 | protein_coding | 13.1596588 | -1.3015308 | 0.14779489 | -8.8063314 | 1.2931E-18 | 6.9742E-18 |
| PCSK1N   | ENSG00000102109 | protein_coding | 753.68564  | -1.5598932 | 0.2660926  | -5.8622192 | 4.5672E-09 | 1.2769E-08 |
| GPR50    | ENSG00000102195 | protein_coding | 0.80342322 | -2.4454956 | 0.43414826 | -5.6328583 | 1.7725E-08 | 4.7174E-08 |
| VGLL1    | ENSG00000102243 | protein_coding | 64.7477269 | -6.1655599 | 0.48694072 | -12.661829 | 9.6232E-37 | 1.3156E-35 |
| PCDH11X  | ENSG00000102290 | protein_coding | 3.91643133 | -1.8873051 | 0.31837615 | -5.9279096 | 3.0682E-09 | 8.7007E-09 |
| SYTL4    | ENSG00000102362 | protein_coding | 819.410512 | -1.1622262 | 0.11763587 | -9.8798623 | 5.0903E-23 | 3.489E-22  |
| ZDHHC15  | ENSG00000102383 | protein_coding | 229.289441 | -1.3021571 | 0.15111718 | -8.6168695 | 6.8809E-18 | 3.5477E-17 |
| CAB39L   | ENSG00000102547 | protein_coding | 1101.58064 | -1.6212112 | 0.09984968 | -16.236518 | 2.7828E-59 | 9.2171E-58 |
| KLF5     | ENSG00000102554 | protein_coding | 998.344351 | -1.4790941 | 0.15155499 | -9.759455  | 1.6806E-22 | 1.121E-21  |
| FGF9     | ENSG00000102678 | protein_coding | 577.982615 | -2.886451  | 0.42156815 | -6.8469381 | 7.5447E-12 | 2.6073E-11 |
| SGCG     | ENSG00000102683 | protein_coding | 16.6829829 | -1.3739459 | 0.17216768 | -7.9802779 | 1.46E-15   | 6.5151E-15 |
| SLC25A15 | ENSG00000102743 | protein_coding | 254.710302 | -1.094039  | 0.11009688 | -9.9370572 | 2.8719E-23 | 1.9968E-22 |
| VWA8     | ENSG00000102763 | protein_coding | 2094.73173 | -1.1460754 | 0.07909041 | -14.4907   | 1.3872E-47 | 2.9674E-46 |
| OLFM4    | ENSG00000102837 | protein_coding | 174.977575 | -4.8860359 | 0.36032971 | -13.559903 | 6.9228E-42 | 1.165E-40  |
| PARD6A   | ENSG00000102981 | protein_coding | 276.723536 | -1.2279987 | 0.1175229  | -10.449016 | 1.4805E-25 | 1.1694E-24 |
| CCDC113  | ENSG00000103021 | protein_coding | 293.718848 | -1.1921818 | 0.14634727 | -8.1462519 | 3.7538E-16 | 1.7348E-15 |
| ESRP2    | ENSG00000103067 | protein_coding | 888.360017 | -1.5249189 | 0.11342982 | -13.443721 | 3.3515E-41 | 5.4899E-40 |

|         |                 |                |            |            |            |            |            |            |
|---------|-----------------|----------------|------------|------------|------------|------------|------------|------------|
| FA2H    | ENSG00000103089 | protein_coding | 236.992128 | -1.6850821 | 0.25338488 | -6.6502866 | 2.9252E-11 | 9.6995E-11 |
| ZP2     | ENSG00000103310 | protein_coding | 3.15183606 | -2.7974966 | 0.26174555 | -10.687848 | 1.1603E-26 | 9.7329E-26 |
| CRYM    | ENSG00000103316 | protein_coding | 998.404063 | -1.2224091 | 0.16718143 | -7.3118712 | 2.6345E-13 | 1.008E-12  |
| TOX3    | ENSG00000103460 | protein_coding | 594.558603 | -2.1886867 | 0.24994968 | -8.756509  | 2.0139E-18 | 1.0737E-17 |
| QPRT    | ENSG00000103485 | protein_coding | 4398.40494 | -1.1768533 | 0.16238457 | -7.2473218 | 4.2509E-13 | 1.6017E-12 |
| SLC6A2  | ENSG00000103546 | protein_coding | 13.4994285 | -1.9838991 | 0.42893148 | -4.6252122 | 3.7422E-06 | 8.115E-06  |
| IQCH    | ENSG00000103599 | protein_coding | 161.856992 | -1.1712711 | 0.09822276 | -11.92464  | 8.8064E-33 | 9.9554E-32 |
| CORO2B  | ENSG00000103647 | protein_coding | 411.801903 | -2.0060383 | 0.16911727 | -11.861818 | 1.8687E-32 | 2.0813E-31 |
| CTSH    | ENSG00000103811 | protein_coding | 10132.0558 | -1.2868493 | 0.09122902 | -14.105702 | 3.5029E-45 | 6.7868E-44 |
| ZDHHC2  | ENSG00000104219 | protein_coding | 2664.92936 | -1.8023343 | 0.12737252 | -14.150103 | 1.8648E-45 | 3.6532E-44 |
| RP1     | ENSG00000104237 | protein_coding | 20.1915962 | -1.5944338 | 0.18144497 | -8.7874236 | 1.5303E-18 | 8.2191E-18 |
| CA2     | ENSG00000104267 | protein_coding | 8190.51851 | -1.4838441 | 0.12868925 | -11.530443 | 9.2666E-31 | 9.4861E-30 |
| CALB1   | ENSG00000104327 | protein_coding | 2845.95924 | -7.5296097 | 0.28594438 | -26.332428 | 8.159E-153 | 6.562E-150 |
| SFRP1   | ENSG00000104332 | protein_coding | 3899.29558 | -5.2834968 | 0.24603185 | -21.474849 | 2.676E-102 | 4.397E-100 |
| LAPTM4B | ENSG00000104341 | protein_coding | 5993.82142 | -1.0453553 | 0.09592792 | -10.897299 | 1.1873E-27 | 1.0481E-26 |
| PLAT    | ENSG00000104368 | protein_coding | 3754.86931 | -1.7852886 | 0.11333831 | -15.751854 | 6.6696E-56 | 1.9524E-54 |
| ESRP1   | ENSG00000104413 | protein_coding | 474.815369 | -3.0772215 | 0.34798944 | -8.8428587 | 9.33E-19   | 5.0735E-18 |
| SH2D4A  | ENSG00000104611 | protein_coding | 1095.30565 | -1.1437084 | 0.11083591 | -10.318934 | 5.7862E-25 | 4.4075E-24 |
| DHDH    | ENSG00000104808 | protein_coding | 319.478944 | -1.2396489 | 0.2175458  | -5.6983353 | 1.2098E-08 | 3.2637E-08 |
| CKM     | ENSG00000104879 | protein_coding | 20.7905669 | -2.8874913 | 0.19880781 | -14.524034 | 8.5337E-48 | 1.8392E-46 |
| KLC3    | ENSG00000104892 | protein_coding | 78.068297  | -1.9763122 | 0.2498682  | -7.9094184 | 2.5859E-15 | 1.1343E-14 |
| CLEC4M  | ENSG00000104938 | protein_coding | 2.77592744 | -2.1343073 | 0.27298281 | -7.8184677 | 5.347E-15  | 2.2968E-14 |
| CCNP    | ENSG00000105219 | protein_coding | 65.8883527 | -4.7924943 | 0.22352989 | -21.440061 | 5.654E-102 | 9.094E-100 |
| TJP3    | ENSG00000105289 | protein_coding | 288.994501 | -2.7559448 | 0.22728187 | -12.125669 | 7.7227E-34 | 9.212E-33  |
| MYH14   | ENSG00000105357 | protein_coding | 2027.39945 | -1.7647582 | 0.20971342 | -8.4150942 | 3.9258E-17 | 1.9328E-16 |

|          |                 |                |            |            |            |            |            |            |
|----------|-----------------|----------------|------------|------------|------------|------------|------------|------------|
| CAPS     | ENSG00000105519 | protein_coding | 776.756281 | -1.7517345 | 0.15322171 | -11.432678 | 2.8712E-30 | 2.8794E-29 |
| FAM83E   | ENSG00000105523 | protein_coding | 21.9909665 | -2.3722628 | 0.30226629 | -7.8482546 | 4.2187E-15 | 1.8232E-14 |
| GCDH     | ENSG00000105607 | protein_coding | 1099.35936 | -1.0639827 | 0.07228905 | -14.718448 | 4.9079E-49 | 1.1165E-47 |
| UPK1A    | ENSG00000105668 | protein_coding | 8.55095912 | -1.5682536 | 0.23099291 | -6.7891851 | 1.1277E-11 | 3.8457E-11 |
| GRIK5    | ENSG00000105737 | protein_coding | 260.985641 | -3.0070237 | 0.25119426 | -11.970909 | 5.0472E-33 | 5.7857E-32 |
| CADM4    | ENSG00000105767 | protein_coding | 916.330466 | -1.6638118 | 0.17849074 | -9.3215581 | 1.1464E-20 | 6.9442E-20 |
| PON3     | ENSG00000105852 | protein_coding | 74.8027846 | -1.4328033 | 0.19903419 | -7.1987797 | 6.0754E-13 | 2.2674E-12 |
| ATP6V0A4 | ENSG00000105929 | protein_coding | 4278.70094 | -2.0166612 | 0.45518566 | -4.4304146 | 9.4052E-06 | 1.9635E-05 |
| HIBADH   | ENSG00000106049 | protein_coding | 6450.48559 | -1.079856  | 0.08354543 | -12.925376 | 3.2371E-38 | 4.696E-37  |
| CPVL     | ENSG00000106066 | protein_coding | 5325.86329 | -1.3924351 | 0.12869711 | -10.819474 | 2.7837E-27 | 2.4123E-26 |
| CHN2     | ENSG00000106069 | protein_coding | 520.771864 | -1.5796985 | 0.11663359 | -13.544113 | 8.5844E-42 | 1.4388E-40 |
| COBL     | ENSG00000106078 | protein_coding | 1822.15512 | -1.2097448 | 0.1303397  | -9.2814759 | 1.6715E-20 | 1.0036E-19 |
| GHRHR    | ENSG00000106128 | protein_coding | 5.9148812  | -1.6215233 | 0.19067783 | -8.5039948 | 1.8318E-17 | 9.2062E-17 |
| PTPRZ1   | ENSG00000106278 | protein_coding | 24.5014345 | -1.0998508 | 0.2768434  | -3.9728267 | 7.1025E-05 | 0.00013568 |
| AGFG2    | ENSG00000106351 | protein_coding | 1619.39783 | -1.1743412 | 0.08877321 | -13.228555 | 6.0031E-40 | 9.3157E-39 |
| MEST     | ENSG00000106484 | protein_coding | 1096.91745 | -1.1715361 | 0.17593787 | -6.6588059 | 2.7606E-11 | 9.1696E-11 |
| AGR2     | ENSG00000106541 | protein_coding | 189.196326 | -2.6522036 | 0.41351829 | -6.4137517 | 1.4198E-10 | 4.4671E-10 |
| TMEM245  | ENSG00000106771 | protein_coding | 8127.08544 | -1.0869943 | 0.08165054 | -13.312764 | 1.9513E-40 | 3.1005E-39 |
| C5       | ENSG00000106804 | protein_coding | 370.108098 | -1.266576  | 0.1084851  | -11.675115 | 1.7084E-31 | 1.8195E-30 |
| OGN      | ENSG00000106809 | protein_coding | 358.397282 | -1.1557454 | 0.28822065 | -4.0099328 | 6.0736E-05 | 0.00011689 |
| PTGR1    | ENSG00000106853 | protein_coding | 5265.54158 | -1.320858  | 0.09760312 | -13.532948 | 9.9934E-42 | 1.6701E-40 |
| SUSD1    | ENSG00000106868 | protein_coding | 1122.30609 | -1.4105274 | 0.11775368 | -11.978627 | 4.5988E-33 | 5.2835E-32 |
| AMBP     | ENSG00000106927 | protein_coding | 195.165809 | -1.8570136 | 0.20717604 | -8.9634573 | 3.1465E-19 | 1.7573E-18 |
| RLN1     | ENSG00000107018 | protein_coding | 8.35254971 | -1.1366017 | 0.1347222  | -8.4366327 | 3.2661E-17 | 1.6162E-16 |
| NCS1     | ENSG00000107130 | protein_coding | 1643.52799 | -1.2216741 | 0.11689492 | -10.451046 | 1.4492E-25 | 1.1456E-24 |



|         |                 |                |            |            |            |            |            |            |
|---------|-----------------|----------------|------------|------------|------------|------------|------------|------------|
| TYRP1   | ENSG00000107165 | protein_coding | 163.938667 | -5.2555799 | 0.35949216 | -14.619456 | 2.1108E-48 | 4.6971E-47 |
| PIP5K1B | ENSG00000107242 | protein_coding | 375.383307 | -1.6867749 | 0.14886185 | -11.331143 | 9.1996E-30 | 9.0227E-29 |
| BAG1    | ENSG00000107262 | protein_coding | 4116.60361 | -1.2150021 | 0.09992567 | -12.159058 | 5.1347E-34 | 6.1699E-33 |
| SH3GL2  | ENSG00000107295 | protein_coding | 280.302563 | -2.7097507 | 0.33404939 | -8.1118264 | 4.9864E-16 | 2.2879E-15 |
| PTGDS   | ENSG00000107317 | protein_coding | 1899.07484 | -1.866294  | 0.24486728 | -7.6216554 | 2.5044E-14 | 1.0271E-13 |
| GATA3   | ENSG00000107485 | protein_coding | 1052.85365 | -3.0897464 | 0.19760006 | -15.636364 | 4.1157E-55 | 1.1762E-53 |
| ATRNL1  | ENSG00000107518 | protein_coding | 280.195819 | -1.9127466 | 0.24719783 | -7.737716  | 1.0122E-14 | 4.2666E-14 |
| PHYH    | ENSG00000107537 | protein_coding | 3958.1191  | -1.1362961 | 0.11602565 | -9.7934909 | 1.2008E-22 | 8.0904E-22 |
| DNMBP   | ENSG00000107554 | protein_coding | 1808.85721 | -1.0100813 | 0.05973712 | -16.908772 | 3.8771E-64 | 1.5049E-62 |
| CXCL12  | ENSG00000107562 | protein_coding | 6454.7589  | -1.2572376 | 0.14059019 | -8.94257   | 3.8022E-19 | 2.113E-18  |
| SPOCK2  | ENSG00000107742 | protein_coding | 8513.2019  | -1.0799939 | 0.10510536 | -10.275346 | 9.1017E-25 | 6.8714E-24 |
| PITX3   | ENSG00000107859 | protein_coding | 2.14166441 | -1.7551329 | 0.28641165 | -6.1280079 | 8.8986E-10 | 2.6384E-09 |
| CPEB3   | ENSG00000107864 | protein_coding | 693.497344 | -1.3527601 | 0.08322885 | -16.2535   | 2.1097E-59 | 7.0283E-58 |
| SORCS1  | ENSG00000108018 | protein_coding | 107.117056 | -2.2699082 | 0.28302432 | -8.0201877 | 1.0558E-15 | 4.7475E-15 |
| DNAJC12 | ENSG00000108176 | protein_coding | 282.624998 | -1.3557872 | 0.18006452 | -7.5294522 | 5.0954E-14 | 2.05E-13   |
| PBLD    | ENSG00000108187 | protein_coding | 5795.47016 | -1.2543403 | 0.13333971 | -9.4071018 | 5.1001E-21 | 3.1449E-20 |
| CYP2C18 | ENSG00000108242 | protein_coding | 10.8095285 | -1.1422468 | 0.28815852 | -3.9639529 | 7.3719E-05 | 0.00014061 |
| KRT23   | ENSG00000108244 | protein_coding | 38.6712375 | -1.3260734 | 0.28470919 | -4.6576415 | 3.1985E-06 | 6.9817E-06 |
| RNF43   | ENSG00000108375 | protein_coding | 425.324702 | -2.5515081 | 0.14971309 | -17.042652 | 3.9634E-65 | 1.6008E-63 |
| HOXB6   | ENSG00000108511 | protein_coding | 814.766476 | -2.0839228 | 0.13575554 | -15.350554 | 3.5118E-53 | 9.3977E-52 |
| RASD1   | ENSG00000108551 | protein_coding | 3315.12733 | -2.5412539 | 0.16601663 | -15.307225 | 6.8422E-53 | 1.8151E-51 |
| SLC6A4  | ENSG00000108576 | protein_coding | 34.3892817 | -2.1461698 | 0.1591468  | -13.485473 | 1.9044E-41 | 3.1619E-40 |
| ASIC2   | ENSG00000108684 | protein_coding | 54.6045014 | -1.7545767 | 0.23638561 | -7.4225191 | 1.1491E-13 | 4.5155E-13 |
| MPP2    | ENSG00000108852 | protein_coding | 130.504013 | -1.9450346 | 0.17913515 | -10.857917 | 1.8287E-27 | 1.5953E-26 |
| VTN     | ENSG00000109072 | protein_coding | 117.878645 | -1.0258632 | 0.24473631 | -4.1917084 | 2.7686E-05 | 5.5243E-05 |

|           |                 |                |            |            |            |            |            |            |
|-----------|-----------------|----------------|------------|------------|------------|------------|------------|------------|
| FOXN1     | ENSG00000109101 | protein_coding | 9.74473049 | -2.5366628 | 0.2392127  | -10.604215 | 2.8485E-26 | 2.338E-25  |
| GABRA4    | ENSG00000109158 | protein_coding | 9.59480696 | -2.9287758 | 0.33988684 | -8.6169144 | 6.8783E-18 | 3.5467E-17 |
| CWH43     | ENSG00000109182 | protein_coding | 251.486406 | -2.735829  | 0.35448911 | -7.7176671 | 1.1848E-14 | 4.9709E-14 |
| USP46     | ENSG00000109189 | protein_coding | 1042.94356 | -1.3236798 | 0.06404113 | -20.669213 | 6.5577E-95 | 8.1027E-93 |
| ODAM      | ENSG00000109205 | protein_coding | 20.6878632 | -2.8662087 | 0.6429582  | -4.4578461 | 8.2787E-06 | 1.7354E-05 |
| CRACD     | ENSG00000109265 | protein_coding | 103.496016 | -1.2769691 | 0.18936161 | -6.7435483 | 1.5456E-11 | 5.2256E-11 |
| MAPK10    | ENSG00000109339 | protein_coding | 1076.65646 | -1.1011689 | 0.0794358  | -13.862376 | 1.0707E-43 | 1.957E-42  |
| TBC1D9    | ENSG00000109436 | protein_coding | 3410.82524 | -1.1459042 | 0.09333414 | -12.277439 | 1.1973E-34 | 1.4822E-33 |
| SOD3      | ENSG00000109610 | protein_coding | 2599.66687 | -1.5461394 | 0.12890901 | -11.994036 | 3.8184E-33 | 4.4046E-32 |
| TRIM2     | ENSG00000109654 | protein_coding | 5498.69923 | -1.7300306 | 0.15295845 | -11.310461 | 1.1648E-29 | 1.1377E-28 |
| GLRB      | ENSG00000109738 | protein_coding | 263.924821 | -1.2247069 | 0.22984574 | -5.3283866 | 9.9089E-08 | 2.4781E-07 |
| PPARGC1A  | ENSG00000109819 | protein_coding | 3573.74093 | -1.6818131 | 0.18115155 | -9.2840117 | 1.6321E-20 | 9.8072E-20 |
| DDX25     | ENSG00000109832 | protein_coding | 46.675472  | -2.4778958 | 0.20288473 | -12.213318 | 2.639E-34  | 3.2115E-33 |
| JHY       | ENSG00000109944 | protein_coding | 402.18899  | -1.0531768 | 0.08972019 | -11.73846  | 8.0947E-32 | 8.7599E-31 |
| VWA5A     | ENSG00000110002 | protein_coding | 1706.17301 | -1.1714446 | 0.09112209 | -12.85577  | 7.9827E-38 | 1.1396E-36 |
| ST3GAL4   | ENSG00000110080 | protein_coding | 2012.97433 | -1.1804274 | 0.14561317 | -8.1065978 | 5.2057E-16 | 2.3847E-15 |
| FOLR3     | ENSG00000110203 | protein_coding | 68.5730933 | -3.1907656 | 0.30423009 | -10.488001 | 9.8081E-26 | 7.8303E-25 |
| APOC3     | ENSG00000110245 | protein_coding | 73.4631354 | -1.5813762 | 0.43918399 | -3.6007147 | 0.00031734 | 0.00056542 |
| KIAA1549L | ENSG00000110427 | protein_coding | 141.856475 | -2.0676446 | 0.2028197  | -10.194496 | 2.0983E-24 | 1.5564E-23 |
| CALCA     | ENSG00000110680 | protein_coding | 233.847552 | -3.04546   | 0.51321096 | -5.934129  | 2.9541E-09 | 8.3913E-09 |
| DAO       | ENSG00000110887 | protein_coding | 638.754354 | -3.2551759 | 0.25209538 | -12.912478 | 3.8278E-38 | 5.5406E-37 |
| SYT10     | ENSG00000110975 | protein_coding | 69.3572888 | -1.7498458 | 0.43517839 | -4.020985  | 5.7955E-05 | 0.00011179 |
| BCL7A     | ENSG00000110987 | protein_coding | 1606.70614 | -1.0336983 | 0.07794862 | -13.261278 | 3.8822E-40 | 6.0885E-39 |
| CYP27B1   | ENSG00000111012 | protein_coding | 237.938448 | -3.6154528 | 0.19390172 | -18.6458   | 1.3659E-77 | 8.8192E-76 |
| MYF6      | ENSG00000111046 | protein_coding | 1.87278519 | -2.1788095 | 0.33830811 | -6.4403111 | 1.1923E-10 | 3.7738E-10 |

|         |                 |                |            |            |            |            |            |            |
|---------|-----------------|----------------|------------|------------|------------|------------|------------|------------|
| MYF5    | ENSG00000111049 | protein_coding | 0.407156   | -2.3029507 | 0.59892789 | -3.8451218 | 0.00012049 | 0.00022497 |
| PPM1H   | ENSG00000111110 | protein_coding | 1403.54731 | -1.8760748 | 0.15266923 | -12.288493 | 1.0443E-34 | 1.2967E-33 |
| SLC6A12 | ENSG00000111181 | protein_coding | 3790.11627 | -1.1524597 | 0.15037721 | -7.6637924 | 1.8052E-14 | 7.4707E-14 |
| PRMT8   | ENSG00000111218 | protein_coding | 12.5887027 | -1.6523516 | 0.26588122 | -6.2146231 | 5.1448E-10 | 1.555E-09  |
| AKAP3   | ENSG00000111254 | protein_coding | 96.8268173 | -2.3432995 | 0.10068502 | -23.273566 | 8.214E-120 | 2.255E-117 |
| KCNA1   | ENSG00000111262 | protein_coding | 3.93743108 | -1.9282157 | 0.28137428 | -6.8528499 | 7.2393E-12 | 2.5069E-11 |
| SCNN1A  | ENSG00000111319 | protein_coding | 5659.34359 | -2.8668824 | 0.25899973 | -11.069055 | 1.7726E-28 | 1.6271E-27 |
| RASAL1  | ENSG00000111344 | protein_coding | 1434.64835 | -1.0556856 | 0.15465543 | -6.8260494 | 8.7285E-12 | 3.0041E-11 |
| RERGL   | ENSG00000111404 | protein_coding | 216.393926 | -1.5682828 | 0.19011227 | -8.2492455 | 1.594E-16  | 7.554E-16  |
| VDR     | ENSG00000111424 | protein_coding | 1430.76853 | -1.7298928 | 0.1373285  | -12.59675  | 2.2002E-36 | 2.9543E-35 |
| ADGRD1  | ENSG00000111452 | protein_coding | 160.47105  | -1.3104673 | 0.15773982 | -8.3077775 | 9.7511E-17 | 4.6846E-16 |
| TBC1D30 | ENSG00000111490 | protein_coding | 337.375521 | -1.1001942 | 0.08080673 | -13.615131 | 3.2556E-42 | 5.5625E-41 |
| LDHB    | ENSG00000111716 | protein_coding | 31456.5295 | -1.5515552 | 0.0832814  | -18.630273 | 1.8259E-77 | 1.169E-75  |
| FRK     | ENSG00000111816 | protein_coding | 2620.08878 | -1.2863561 | 0.0960701  | -13.389765 | 6.94E-41   | 1.1222E-39 |
| RSPH4A  | ENSG00000111834 | protein_coding | 44.0666391 | -1.0382268 | 0.12413789 | -8.3634969 | 6.0886E-17 | 2.961E-16  |
| ADTRP   | ENSG00000111863 | protein_coding | 292.203307 | -1.9651298 | 0.20214126 | -9.7215665 | 2.44E-22   | 1.614E-21  |
| FAM184A | ENSG00000111879 | protein_coding | 230.065366 | -1.5664554 | 0.12379643 | -12.653478 | 1.0703E-36 | 1.4607E-35 |
| MAN1A1  | ENSG00000111885 | protein_coding | 7667.39904 | -1.4042631 | 0.10566706 | -13.289508 | 2.6633E-40 | 4.2084E-39 |
| TPD52L1 | ENSG00000111907 | protein_coding | 1248.91513 | -1.7147853 | 0.15745935 | -10.890337 | 1.2817E-27 | 1.1292E-26 |
| NCOA7   | ENSG00000111912 | protein_coding | 5022.4477  | -1.1537502 | 0.10891422 | -10.593201 | 3.2044E-26 | 2.6222E-25 |
| UST     | ENSG00000111962 | protein_coding | 429.218825 | -1.2028332 | 0.1970656  | -6.1037196 | 1.0363E-09 | 3.0579E-09 |
| TULP1   | ENSG00000112041 | protein_coding | 2.2935326  | -1.0111432 | 0.20056655 | -5.041435  | 4.6205E-07 | 1.0911E-06 |
| PHACTR1 | ENSG00000112137 | protein_coding | 1079.02234 | -1.0932873 | 0.10406948 | -10.50536  | 8.1611E-26 | 6.5404E-25 |
| BMP5    | ENSG00000112175 | protein_coding | 90.378906  | -1.4165256 | 0.31027025 | -4.5654575 | 4.9841E-06 | 1.0683E-05 |
| BACH2   | ENSG00000112182 | protein_coding | 147.320372 | -1.0997223 | 0.12561288 | -8.754853  | 2.0437E-18 | 1.0889E-17 |

|          |                 |                |            |            |            |            |            |            |
|----------|-----------------|----------------|------------|------------|------------|------------|------------|------------|
| GPR63    | ENSG00000112218 | protein_coding | 54.8734018 | -1.0231792 | 0.12411144 | -8.244036  | 1.665E-16  | 7.8749E-16 |
| KHDRBS2  | ENSG00000112232 | protein_coding | 11.7095378 | -2.2810703 | 0.20856342 | -10.937058 | 7.6647E-28 | 6.8291E-27 |
| SIM1     | ENSG00000112246 | protein_coding | 1226.98868 | -2.9955211 | 0.28604318 | -10.472269 | 1.1583E-25 | 9.2154E-25 |
| BVES     | ENSG00000112276 | protein_coding | 245.237855 | -1.2707072 | 0.12287212 | -10.341704 | 4.5635E-25 | 3.5012E-24 |
| ALDH5A1  | ENSG00000112294 | protein_coding | 2274.03942 | -1.0891206 | 0.09691641 | -11.237731 | 2.6614E-29 | 2.5619E-28 |
| EYA4     | ENSG00000112319 | protein_coding | 273.288106 | -3.4993637 | 0.17905315 | -19.543715 | 4.666E-85  | 3.9103E-83 |
| SLC16A10 | ENSG00000112394 | protein_coding | 529.494433 | -1.5127166 | 0.17382666 | -8.7024429 | 3.2482E-18 | 1.7093E-17 |
| EPM2A    | ENSG00000112425 | protein_coding | 521.324026 | -1.396607  | 0.06689144 | -20.87871  | 8.3618E-97 | 1.1307E-94 |
| UNC93A   | ENSG00000112494 | protein_coding | 71.5217255 | -1.0732    | 0.39341717 | -2.7278932 | 0.00637402 | 0.00980052 |
| PACRG    | ENSG00000112530 | protein_coding | 269.310528 | -1.3354758 | 0.25437277 | -5.2500738 | 1.5204E-07 | 3.7411E-07 |
| C6orf118 | ENSG00000112539 | protein_coding | 3.92279973 | -1.165135  | 0.2748159  | -4.2396926 | 2.2383E-05 | 4.5051E-05 |
| PRPH2    | ENSG00000112619 | protein_coding | 55.7434549 | -1.2619901 | 0.15128447 | -8.3418348 | 7.3147E-17 | 3.5441E-16 |
| GMDS     | ENSG00000112699 | protein_coding | 879.864835 | -1.0059753 | 0.06993348 | -14.384746 | 6.4515E-47 | 1.3425E-45 |
| CLIC5    | ENSG00000112782 | protein_coding | 2215.05942 | -3.8274958 | 0.18075139 | -21.17547  | 1.608E-99  | 2.3471E-97 |
| SEMA5A   | ENSG00000112902 | protein_coding | 4249.45925 | -1.0246807 | 0.11074373 | -9.2527198 | 2.1885E-20 | 1.3034E-19 |
| C7       | ENSG00000112936 | protein_coding | 12503.0128 | -3.310292  | 0.24597557 | -13.457808 | 2.7701E-41 | 4.5645E-40 |
| NNT      | ENSG00000112992 | protein_coding | 6961.92103 | -1.2375328 | 0.12285126 | -10.073424 | 7.2413E-24 | 5.1956E-23 |
| SLC4A9   | ENSG00000113073 | protein_coding | 249.925492 | -3.1170311 | 0.362009   | -8.6103691 | 7.2826E-18 | 3.7502E-17 |
| CDH9     | ENSG00000113100 | protein_coding | 57.8027833 | -2.2491823 | 0.34036548 | -6.6081387 | 3.8918E-11 | 1.2779E-10 |
| HMGCR    | ENSG00000113161 | protein_coding | 2211.01129 | -1.0268944 | 0.07543421 | -13.613113 | 3.3468E-42 | 5.7139E-41 |
| PDE8B    | ENSG00000113231 | protein_coding | 733.722961 | -1.0432809 | 0.11309017 | -9.2252126 | 2.83E-20   | 1.6737E-19 |
| SLC27A6  | ENSG00000113396 | protein_coding | 1.61142044 | -1.4574781 | 0.34293977 | -4.2499534 | 2.1381E-05 | 4.3112E-05 |
| AGXT2    | ENSG00000113492 | protein_coding | 3899.59666 | -1.242371  | 0.21222753 | -5.8539577 | 4.8001E-09 | 1.3395E-08 |
| PRLR     | ENSG00000113494 | protein_coding | 1517.67404 | -1.8104275 | 0.21804377 | -8.303046  | 1.0148E-16 | 4.8694E-16 |
| FGF1     | ENSG00000113578 | protein_coding | 1379.72097 | -4.2361482 | 0.17366564 | -24.392552 | 2.052E-131 | 8.178E-129 |

|              |                 |                |            |            |            |            |            |            |
|--------------|-----------------|----------------|------------|------------|------------|------------|------------|------------|
| CPEB4        | ENSG00000113742 | protein_coding | 5732.63975 | -1.0093469 | 0.1013764  | -9.9564293 | 2.364E-23  | 1.6492E-22 |
| CNTN3        | ENSG00000113805 | protein_coding | 218.286708 | -1.7033875 | 0.32672365 | -5.2135421 | 1.8527E-07 | 4.53E-07   |
| KNG1         | ENSG00000113889 | protein_coding | 7700.98515 | -7.5316943 | 0.38756913 | -19.433163 | 4.0464E-84 | 3.2485E-82 |
| HRG          | ENSG00000113905 | protein_coding | 403.66418  | -7.0539069 | 0.34534058 | -20.425942 | 9.8343E-93 | 1.1214E-90 |
| CLDN16       | ENSG00000113946 | protein_coding | 846.57717  | -5.8696521 | 0.25072073 | -23.411116 | 3.293E-121 | 9.494E-119 |
| PCCB         | ENSG00000114054 | protein_coding | 2247.70958 | -1.659324  | 0.10870747 | -15.26412  | 1.326E-52  | 3.4895E-51 |
| RBP2         | ENSG00000114113 | protein_coding | 17.2626871 | -3.9940526 | 0.17608711 | -22.682255 | 6.706E-114 | 1.585E-111 |
| BCHE         | ENSG00000114200 | protein_coding | 155.790067 | -1.013751  | 0.26506195 | -3.8245813 | 0.00013099 | 0.0002435  |
| WNT5A        | ENSG00000114251 | protein_coding | 545.29264  | -1.2862429 | 0.15641275 | -8.223389  | 1.9783E-16 | 9.3004E-16 |
| HYAL1        | ENSG00000114378 | protein_coding | 2473.71514 | -1.0733086 | 0.1057506  | -10.149433 | 3.333E-24  | 2.4377E-23 |
| C3orf52      | ENSG00000114529 | protein_coding | 284.089459 | -1.9258195 | 0.17523692 | -10.989805 | 4.2785E-28 | 3.8611E-27 |
| ROPN1B       | ENSG00000114547 | protein_coding | 5.47853539 | -1.318455  | 0.17859132 | -7.3825252 | 1.5532E-13 | 6.0455E-13 |
| ATP6V1A      | ENSG00000114573 | protein_coding | 11400.9214 | -1.140808  | 0.132898   | -8.5840868 | 9.1561E-18 | 4.6829E-17 |
| ABHD14A-ACY1 | ENSG00000114786 | protein_coding | 21.4333441 | -1.1126398 | 0.14020855 | -7.9356059 | 2.0947E-15 | 9.2472E-15 |
| ARHGEF26     | ENSG00000114790 | protein_coding | 207.340193 | -1.4153365 | 0.146271   | -9.6761248 | 3.8088E-22 | 2.4971E-21 |
| TNNC1        | ENSG00000114854 | protein_coding | 79.5148975 | -3.3460179 | 0.2172604  | -15.400956 | 1.6127E-53 | 4.3717E-52 |
| EPB41L5      | ENSG00000115109 | protein_coding | 2329.55552 | -1.7729105 | 0.08545978 | -20.745554 | 1.3447E-95 | 1.7028E-93 |
| TFCP2L1      | ENSG00000115112 | protein_coding | 4647.77103 | -3.0989203 | 0.30071245 | -10.305261 | 6.671E-25  | 5.0647E-24 |
| ITGB6        | ENSG00000115221 | protein_coding | 2184.92629 | -2.5974038 | 0.19968386 | -13.007581 | 1.1079E-38 | 1.6347E-37 |
| PDE1A        | ENSG00000115252 | protein_coding | 2273.55375 | -2.8073746 | 0.16810316 | -16.700308 | 1.3039E-62 | 4.7894E-61 |
| REEP6        | ENSG00000115255 | protein_coding | 318.917364 | -2.9791844 | 0.16876954 | -17.652382 | 9.7553E-70 | 4.6631E-68 |
| GRB14        | ENSG00000115290 | protein_coding | 887.103001 | -1.293015  | 0.18533431 | -6.9766629 | 3.0227E-12 | 1.0746E-11 |
| GALNT3       | ENSG00000115339 | protein_coding | 599.841225 | -2.5640536 | 0.17264881 | -14.851267 | 6.8266E-50 | 1.6089E-48 |
| TACR1        | ENSG00000115353 | protein_coding | 112.547023 | -1.4334072 | 0.17566058 | -8.1600957 | 3.3476E-16 | 1.5512E-15 |
| IGFBP2       | ENSG00000115457 | protein_coding | 2568.07567 | -1.7902585 | 0.19243766 | -9.3030571 | 1.3646E-20 | 8.2322E-20 |

|          |                 |                |            |            |            |            |            |            |
|----------|-----------------|----------------|------------|------------|------------|------------|------------|------------|
| EFHD1    | ENSG00000115468 | protein_coding | 4517.23586 | -2.633102  | 0.12861939 | -20.472045 | 3.8224E-93 | 4.3915E-91 |
| KCNJ13   | ENSG00000115474 | protein_coding | 165.510478 | -2.3071583 | 0.33069467 | -6.9767024 | 3.0219E-12 | 1.0743E-11 |
| IL1RL1   | ENSG00000115602 | protein_coding | 928.358425 | -2.0960554 | 0.24281182 | -8.632427  | 6.0064E-18 | 3.1101E-17 |
| SLC9A2   | ENSG00000115616 | protein_coding | 334.753632 | -2.9896506 | 0.3383291  | -8.8365163 | 9.875E-19  | 5.3622E-18 |
| UXS1     | ENSG00000115652 | protein_coding | 3533.57242 | -1.4532853 | 0.06040396 | -24.059436 | 6.65E-128  | 2.309E-125 |
| SLC5A7   | ENSG00000115665 | protein_coding | 11.3257857 | -4.3604429 | 0.23224262 | -18.775378 | 1.2009E-78 | 8.0249E-77 |
| PROC     | ENSG00000115718 | protein_coding | 277.614336 | -1.9666388 | 0.24011085 | -8.1905454 | 2.6005E-16 | 1.214E-15  |
| PLCL1    | ENSG00000115896 | protein_coding | 1957.9949  | -2.6597293 | 0.13256704 | -20.063278 | 1.5455E-89 | 1.5302E-87 |
| ATP6V1B1 | ENSG00000116039 | protein_coding | 2203.81043 | -2.6769786 | 0.35833398 | -7.4706247 | 7.9815E-14 | 3.1697E-13 |
| PARD3B   | ENSG00000116117 | protein_coding | 1316.70911 | -1.4306295 | 0.07758192 | -18.440242 | 6.2461E-76 | 3.7874E-74 |
| BCL9     | ENSG00000116128 | protein_coding | 1341.61778 | -1.0700545 | 0.06016461 | -17.785448 | 9.1627E-71 | 4.5409E-69 |
| PAPPA2   | ENSG00000116183 | protein_coding | 918.380594 | -3.4099482 | 0.30552188 | -11.161061 | 6.3233E-29 | 5.9618E-28 |
| ANGPTL1  | ENSG00000116194 | protein_coding | 401.762749 | -2.4942167 | 0.22931073 | -10.877017 | 1.4834E-27 | 1.3002E-26 |
| NPHS2    | ENSG00000116218 | protein_coding | 985.567934 | -7.1043532 | 0.49738767 | -14.283332 | 2.7799E-46 | 5.6361E-45 |
| CHD5     | ENSG00000116254 | protein_coding | 46.9932781 | -1.5705305 | 0.2758887  | -5.6926237 | 1.251E-08  | 3.3698E-08 |
| DLGAP3   | ENSG00000116544 | protein_coding | 41.7069325 | -1.5979162 | 0.11177953 | -14.295249 | 2.3427E-46 | 4.7708E-45 |
| FBXO2    | ENSG00000116661 | protein_coding | 471.551911 | -2.4735951 | 0.20853898 | -11.861548 | 1.8748E-32 | 2.0875E-31 |
| DNAJC6   | ENSG00000116675 | protein_coding | 663.562236 | -1.4435502 | 0.13082398 | -11.034293 | 2.611E-28  | 2.379E-27  |
| PLA2G4A  | ENSG00000116711 | protein_coding | 445.13434  | -1.543902  | 0.13808895 | -11.180489 | 5.0809E-29 | 4.8143E-28 |
| WLS      | ENSG00000116729 | protein_coding | 4983.9794  | -1.4682908 | 0.10296226 | -14.260476 | 3.8581E-46 | 7.7741E-45 |
| CTH      | ENSG00000116761 | protein_coding | 286.572016 | -1.8779782 | 0.10514213 | -17.861329 | 2.3595E-71 | 1.2005E-69 |
| AGMAT    | ENSG00000116771 | protein_coding | 2946.53625 | -2.4773941 | 0.1837133  | -13.48511  | 1.9138E-41 | 3.1763E-40 |
| HAO2     | ENSG00000116882 | protein_coding | 2056.57945 | -2.5074333 | 0.24330238 | -10.305831 | 6.6316E-25 | 5.0356E-24 |
| NT5C1A   | ENSG00000116981 | protein_coding | 5.68672855 | -4.2343761 | 0.19970029 | -21.203655 | 8.836E-100 | 1.3024E-97 |
| HPCAL4   | ENSG00000116983 | protein_coding | 140.851529 | -3.9945921 | 0.26340097 | -15.165442 | 5.9894E-52 | 1.5416E-50 |



|          |                 |                |            |            |            |            |            |            |
|----------|-----------------|----------------|------------|------------|------------|------------|------------|------------|
| ACADM    | ENSG00000117054 | protein_coding | 5695.90082 | -1.5380933 | 0.09880764 | -15.566542 | 1.2287E-54 | 3.4598E-53 |
| PADI2    | ENSG00000117115 | protein_coding | 1342.62993 | -2.4819989 | 0.16467266 | -15.072319 | 2.4631E-51 | 6.1432E-50 |
| RAB29    | ENSG00000117280 | protein_coding | 3171.26727 | -1.1624089 | 0.09742079 | -11.931837 | 8.0771E-33 | 9.1536E-32 |
| CR2      | ENSG00000117322 | protein_coding | 136.447181 | -3.8758103 | 0.31649626 | -12.245991 | 1.7651E-34 | 2.164E-33  |
| IPO13    | ENSG00000117408 | protein_coding | 2474.86236 | -1.0580482 | 0.06745994 | -15.684097 | 1.9431E-55 | 5.6056E-54 |
| TSPAN1   | ENSG00000117472 | protein_coding | 10679.0248 | -1.1288662 | 0.19651185 | -5.7445198 | 9.2182E-09 | 2.5107E-08 |
| CCDC181  | ENSG00000117477 | protein_coding | 108.050101 | -3.062558  | 0.16261511 | -18.83317  | 4.0385E-79 | 2.7225E-77 |
| SLC19A2  | ENSG00000117479 | protein_coding | 1037.22836 | -1.1035733 | 0.15148715 | -7.2849303 | 3.2184E-13 | 1.2236E-12 |
| ABCD3    | ENSG00000117528 | protein_coding | 4482.81065 | -1.0050852 | 0.07037111 | -14.282639 | 2.8077E-46 | 5.6899E-45 |
| IRF6     | ENSG00000117595 | protein_coding | 1947.32075 | -1.5686559 | 0.18137588 | -8.6486463 | 5.2114E-18 | 2.7095E-17 |
| SERPINC1 | ENSG00000117601 | protein_coding | 35.1165076 | -1.1596959 | 0.26390551 | -4.3943604 | 1.111E-05  | 2.3026E-05 |
| MAN1C1   | ENSG00000117643 | protein_coding | 1285.8867  | -2.1988089 | 0.16415789 | -13.394476 | 6.5134E-41 | 1.0554E-39 |
| PROX1    | ENSG00000117707 | protein_coding | 542.844089 | -4.3231644 | 0.21040174 | -20.547189 | 8.155E-94  | 9.71E-92   |
| TREH     | ENSG00000118094 | protein_coding | 265.157851 | -2.3397791 | 0.22680885 | -10.316084 | 5.9605E-25 | 4.5335E-24 |
| TNNT2    | ENSG00000118194 | protein_coding | 147.659248 | -4.8667364 | 0.26803907 | -18.156817 | 1.1341E-73 | 6.2789E-72 |
| ATP10B   | ENSG00000118322 | protein_coding | 30.4079575 | -2.0765417 | 0.22998882 | -9.0288813 | 1.7344E-19 | 9.8312E-19 |
| CCN2     | ENSG00000118523 | protein_coding | 13062.4301 | -1.2077492 | 0.14260013 | -8.4694819 | 2.4649E-17 | 1.2294E-16 |
| TCF21    | ENSG00000118526 | protein_coding | 531.767858 | -3.5395248 | 0.16613957 | -21.304526 | 1.031E-100 | 1.5854E-98 |
| SLC16A7  | ENSG00000118596 | protein_coding | 2779.78757 | -1.9089374 | 0.22036534 | -8.6626026 | 4.6111E-18 | 2.4059E-17 |
| OLFM3    | ENSG00000118733 | protein_coding | 9.03708115 | -5.4412361 | 0.37236549 | -14.612622 | 2.3336E-48 | 5.1729E-47 |
| PPL      | ENSG00000118898 | protein_coding | 2750.80572 | -1.524746  | 0.13084746 | -11.652852 | 2.2191E-31 | 2.3515E-30 |
| TRPM6    | ENSG00000119121 | protein_coding | 142.624835 | -3.0064505 | 0.16658231 | -18.047837 | 8.2041E-73 | 4.3782E-71 |
| ECRG4    | ENSG00000119147 | protein_coding | 328.023605 | -2.0591668 | 0.20143738 | -10.222367 | 1.5745E-24 | 1.174E-23  |
| CTNNAL1  | ENSG00000119326 | protein_coding | 1711.69858 | -1.4036625 | 0.09810981 | -14.307055 | 1.9771E-46 | 4.0443E-45 |
| BSPRY    | ENSG00000119411 | protein_coding | 523.690149 | -2.0683022 | 0.1996709  | -10.358556 | 3.827E-25  | 2.9519E-24 |

|          |                 |                |            |            |            |            |            |            |
|----------|-----------------|----------------|------------|------------|------------|------------|------------|------------|
| NR4A3    | ENSG00000119508 | protein_coding | 1372.91552 | -1.2811024 | 0.18556676 | -6.9037277 | 5.0655E-12 | 1.7711E-11 |
| IRF2BPL  | ENSG00000119669 | protein_coding | 2419.82111 | -1.4740724 | 0.07620189 | -19.344302 | 2.2766E-83 | 1.7771E-81 |
| AREL1    | ENSG00000119682 | protein_coding | 2121.47016 | -1.1934116 | 0.06322571 | -18.875417 | 1.8168E-79 | 1.2375E-77 |
| PPP4R4   | ENSG00000119698 | protein_coding | 22.5252457 | -1.764757  | 0.24077081 | -7.3296133 | 2.3082E-13 | 8.8662E-13 |
| ALDH6A1  | ENSG00000119711 | protein_coding | 6834.63126 | -3.0617224 | 0.1359546  | -22.520183 | 2.633E-112 | 5.916E-110 |
| ESRRB    | ENSG00000119715 | protein_coding | 461.127043 | -5.9282099 | 0.21303321 | -27.827633 | 2.009E-170 | 2.489E-167 |
| EPCAM    | ENSG00000119888 | protein_coding | 5117.19482 | -2.8565563 | 0.15986313 | -17.868762 | 2.0653E-71 | 1.0519E-69 |
| ELOVL3   | ENSG00000119915 | protein_coding | 13.4555913 | -1.4511634 | 0.15232432 | -9.5268003 | 1.6221E-21 | 1.0287E-20 |
| GOT1     | ENSG00000120053 | protein_coding | 6667.47212 | -1.021342  | 0.11232897 | -9.0924185 | 9.686E-20  | 5.5697E-19 |
| C10orf95 | ENSG00000120055 | protein_coding | 21.6089595 | -1.3759054 | 0.11504815 | -11.959387 | 5.7988E-33 | 6.6224E-32 |
| HOXB8    | ENSG00000120068 | protein_coding | 630.43353  | -2.2292387 | 0.18603205 | -11.98309  | 4.3577E-33 | 5.0129E-32 |
| HOXB5    | ENSG00000120075 | protein_coding | 297.807283 | -1.9375957 | 0.13991984 | -13.847898 | 1.3099E-43 | 2.3904E-42 |
| HOXB1    | ENSG00000120094 | protein_coding | 4.80370722 | -2.2288207 | 0.38666427 | -5.7642272 | 8.2033E-09 | 2.2426E-08 |
| TEK      | ENSG00000120156 | protein_coding | 2786.3223  | -1.437027  | 0.12584681 | -11.418859 | 3.3662E-30 | 3.3612E-29 |
| INSL4    | ENSG00000120211 | protein_coding | 1.10397561 | -1.8477042 | 0.31039481 | -5.9527549 | 2.6367E-09 | 7.5199E-09 |
| GRIA2    | ENSG00000120251 | protein_coding | 15.0093138 | -1.4545475 | 0.33903569 | -4.290249  | 1.7847E-05 | 3.6247E-05 |
| KCNJ5    | ENSG00000120457 | protein_coding | 937.269678 | -1.3887054 | 0.16188117 | -8.5785479 | 9.6078E-18 | 4.9095E-17 |
| TP53AIP1 | ENSG00000120471 | protein_coding | 17.5955399 | -1.4143835 | 0.24212545 | -5.8415315 | 5.1723E-09 | 1.4399E-08 |
| ENOX1    | ENSG00000120658 | protein_coding | 139.842483 | -1.9335258 | 0.11921993 | -16.218142 | 3.7538E-59 | 1.2389E-57 |
| EPHX2    | ENSG00000120915 | protein_coding | 4545.14573 | -1.3902216 | 0.11413815 | -12.180165 | 3.9648E-34 | 4.7866E-33 |
| RDH10    | ENSG00000121039 | protein_coding | 3111.972   | -1.6422577 | 0.11144252 | -14.736366 | 3.7651E-49 | 8.6168E-48 |
| EPX      | ENSG00000121053 | protein_coding | 17.3859804 | -1.4760354 | 0.12260781 | -12.038673 | 2.2251E-33 | 2.5901E-32 |
| SCPEP1   | ENSG00000121064 | protein_coding | 4186.6956  | -1.1882057 | 0.08512722 | -13.958    | 2.8122E-44 | 5.2574E-43 |
| PDZRN3   | ENSG00000121440 | protein_coding | 693.757422 | -1.1930691 | 0.15104522 | -7.8987544 | 2.817E-15  | 1.232E-14  |
| GJA8     | ENSG00000121634 | protein_coding | 3.34333975 | -3.1527445 | 0.29027611 | -10.861192 | 1.7643E-27 | 1.5405E-26 |

|         |                 |                |            |            |            |            |            |            |
|---------|-----------------|----------------|------------|------------|------------|------------|------------|------------|
| CAT     | ENSG00000121691 | protein_coding | 11745.5161 | -1.2718672 | 0.0975464  | -13.038587 | 7.3812E-39 | 1.0964E-37 |
| GJA3    | ENSG00000121743 | protein_coding | 48.6956962 | -2.9975782 | 0.22041968 | -13.599413 | 4.0366E-42 | 6.8611E-41 |
| SLITRK3 | ENSG00000121871 | protein_coding | 2.76338451 | -2.6614852 | 0.32714287 | -8.1355442 | 4.1009E-16 | 1.8909E-15 |
| RASL11A | ENSG00000122035 | protein_coding | 1146.19889 | -1.0575828 | 0.10797658 | -9.7945572 | 1.1882E-22 | 8.0086E-22 |
| XPNPEP2 | ENSG00000122121 | protein_coding | 1803.64912 | -5.4050311 | 0.27951463 | -19.337203 | 2.6127E-83 | 2.03E-81   |
| TBX22   | ENSG00000122145 | protein_coding | 0.8685127  | -1.3006585 | 0.39838848 | -3.2647996 | 0.00109542 | 0.00184133 |
| PLG     | ENSG00000122194 | protein_coding | 2457.99425 | -3.2271526 | 0.38058452 | -8.4794637 | 2.2623E-17 | 1.1319E-16 |
| PTGFR   | ENSG00000122420 | protein_coding | 309.678038 | -1.6753937 | 0.20988695 | -7.9823624 | 1.4356E-15 | 6.4104E-15 |
| HOXA7   | ENSG00000122592 | protein_coding | 201.934912 | -1.4975557 | 0.14540793 | -10.298996 | 7.12E-25   | 5.3993E-24 |
| SPINK4  | ENSG00000122711 | protein_coding | 3.04338244 | -1.7829443 | 0.35796141 | -4.9808281 | 6.3313E-07 | 1.4769E-06 |
| ACO1    | ENSG00000122729 | protein_coding | 6035.69883 | -1.1081963 | 0.08903894 | -12.446199 | 1.4667E-35 | 1.8982E-34 |
| CNTFR   | ENSG00000122756 | protein_coding | 67.976784  | -1.3403974 | 0.27404072 | -4.8912345 | 1.0021E-06 | 2.2919E-06 |
| NUDT10  | ENSG00000122824 | protein_coding | 48.8481769 | -2.6870378 | 0.18067928 | -14.871864 | 5.0196E-50 | 1.1904E-48 |
| PLAU    | ENSG00000122861 | protein_coding | 3828.18064 | -2.1660428 | 0.14697371 | -14.737621 | 3.6958E-49 | 8.4625E-48 |
| EGR2    | ENSG00000122877 | protein_coding | 1039.39003 | -1.183477  | 0.18279389 | -6.4743795 | 9.5202E-11 | 3.0377E-10 |
| RASSF8  | ENSG00000123094 | protein_coding | 2171.69026 | -1.51842   | 0.08207568 | -18.500243 | 2.0554E-76 | 1.2733E-74 |
| ITPR2   | ENSG00000123104 | protein_coding | 3680.68064 | -1.2057118 | 0.12816373 | -9.4075897 | 5.0764E-21 | 3.1308E-20 |
| SARDH   | ENSG00000123453 | protein_coding | 766.786017 | -1.25313   | 0.14010428 | -8.9442669 | 3.7443E-19 | 2.0813E-18 |
| IL13RA2 | ENSG00000123496 | protein_coding | 146.033816 | -1.1485184 | 0.21272087 | -5.3991807 | 6.6946E-08 | 1.6995E-07 |
| PLP1    | ENSG00000123560 | protein_coding | 30.6473958 | -2.1127528 | 0.25856012 | -8.1712246 | 3.0527E-16 | 1.4188E-15 |
| NRK     | ENSG00000123572 | protein_coding | 458.37268  | -4.8094109 | 0.29192496 | -16.474819 | 5.5655E-61 | 1.9446E-59 |
| PFKFB2  | ENSG00000123836 | protein_coding | 1889.53094 | -1.7233482 | 0.17457713 | -9.8715575 | 5.5299E-23 | 3.7824E-22 |
| SLPI    | ENSG00000124107 | protein_coding | 2263.40034 | -1.5972995 | 0.34830042 | -4.5859823 | 4.5186E-06 | 9.7297E-06 |
| SEMG2   | ENSG00000124157 | protein_coding | 12.6718343 | -7.5971649 | 0.46480947 | -16.344686 | 4.7461E-60 | 1.6128E-58 |
| EDN3    | ENSG00000124205 | protein_coding | 16.5549153 | -1.3543439 | 0.38089619 | -3.5556773 | 0.00037701 | 0.00066658 |

|          |                 |                |            |            |            |            |            |            |
|----------|-----------------|----------------|------------|------------|------------|------------|------------|------------|
| SEMG1    | ENSG00000124233 | protein_coding | 1.47014858 | -5.036829  | 0.39485826 | -12.756043 | 2.8849E-37 | 4.0343E-36 |
| C20orf85 | ENSG00000124237 | protein_coding | 0.77520639 | -2.6483176 | 0.62172705 | -4.2596146 | 2.0478E-05 | 4.1367E-05 |
| PCK1     | ENSG00000124253 | protein_coding | 15226.0775 | -2.8654675 | 0.25900535 | -11.063353 | 1.889E-28  | 1.7322E-27 |
| PEPD     | ENSG00000124299 | protein_coding | 7689.67654 | -1.8870736 | 0.10441174 | -18.073385 | 5.1646E-73 | 2.7853E-71 |
| LYPD3    | ENSG00000124466 | protein_coding | 82.7598493 | -1.3121731 | 0.15777571 | -8.3166989 | 9.0447E-17 | 4.352E-16  |
| CRISP2   | ENSG00000124490 | protein_coding | 6.10406285 | -4.678214  | 0.44767317 | -10.450065 | 1.4642E-25 | 1.1573E-24 |
| SLC17A1  | ENSG00000124568 | protein_coding | 2176.82492 | -1.1877739 | 0.21935826 | -5.4147672 | 6.1368E-08 | 1.5626E-07 |
| TCP11    | ENSG00000124678 | protein_coding | 14.1170173 | -1.3110809 | 0.16649752 | -7.8744773 | 3.4217E-15 | 1.4875E-14 |
| CRISP1   | ENSG00000124812 | protein_coding | 0.51781216 | -1.6426072 | 0.44736411 | -3.6717457 | 0.0002409  | 0.00043521 |
| SCGB1D2  | ENSG00000124935 | protein_coding | 86.3006904 | -1.4842717 | 0.22220631 | -6.679701  | 2.3943E-11 | 7.9887E-11 |
| SCGB2A1  | ENSG00000124939 | protein_coding | 22.765887  | -2.1781898 | 0.28882201 | -7.5416337 | 4.6412E-14 | 1.872E-13  |
| SSUH2    | ENSG00000125046 | protein_coding | 33.1775186 | -1.2363661 | 0.1568612  | -7.8819116 | 3.2241E-15 | 1.4034E-14 |
| MT1G     | ENSG00000125144 | protein_coding | 3897.27361 | -4.4587237 | 0.28743657 | -15.512026 | 2.8766E-54 | 7.958E-53  |
| GOT2     | ENSG00000125166 | protein_coding | 6532.94338 | -1.0789576 | 0.08068267 | -13.372853 | 8.7133E-41 | 1.399E-39  |
| DMAC2L   | ENSG00000125375 | protein_coding | 2066.60657 | -1.0270967 | 0.0748465  | -13.722708 | 7.424E-43  | 1.3104E-41 |
| HS3ST3B1 | ENSG00000125430 | protein_coding | 300.355559 | -1.2946864 | 0.10828439 | -11.956353 | 6.0146E-33 | 6.8654E-32 |
| SLC25A35 | ENSG00000125434 | protein_coding | 320.646107 | -1.5828531 | 0.09597033 | -16.49315  | 4.1095E-61 | 1.4436E-59 |
| FNDC11   | ENSG00000125531 | protein_coding | 24.4399814 | -2.0125009 | 0.17962098 | -11.204153 | 3.8906E-29 | 3.7094E-28 |
| CST11    | ENSG00000125831 | protein_coding | 0.36184714 | -2.3600329 | 0.50728155 | -4.6523137 | 3.2823E-06 | 7.1575E-06 |
| FLRT3    | ENSG00000125848 | protein_coding | 2462.73744 | -1.1767932 | 0.19625263 | -5.996318  | 2.0184E-09 | 5.8156E-09 |
| OVOL2    | ENSG00000125850 | protein_coding | 31.0077117 | -3.4667891 | 0.33148311 | -10.458419 | 1.3407E-25 | 1.0619E-24 |
| PCSK2    | ENSG00000125851 | protein_coding | 10.4397272 | -2.3698493 | 0.29108692 | -8.1413801 | 3.908E-16  | 1.8037E-15 |
| FAM83C   | ENSG00000125998 | protein_coding | 1.63777735 | -1.2703884 | 0.28881489 | -4.398625  | 1.0894E-05 | 2.2602E-05 |
| PROZ     | ENSG00000126231 | protein_coding | 74.0325683 | -4.1809053 | 0.27231859 | -15.352993 | 3.3822E-53 | 9.0668E-52 |
| KIRREL2  | ENSG00000126259 | protein_coding | 21.7428913 | -2.4504627 | 0.26527081 | -9.2375889 | 2.5211E-20 | 1.4959E-19 |

|         |                 |                |            |            |            |            |            |            |
|---------|-----------------|----------------|------------|------------|------------|------------|------------|------------|
| PRRG2   | ENSG00000126460 | protein_coding | 176.73384  | -2.80461   | 0.18165477 | -15.439231 | 8.9157E-54 | 2.4357E-52 |
| FLRT1   | ENSG00000126500 | protein_coding | 86.2967675 | -4.1110914 | 0.21832375 | -18.830253 | 4.2672E-79 | 2.8724E-77 |
| WNK4    | ENSG00000126562 | protein_coding | 977.085529 | -4.0894162 | 0.17731821 | -23.062584 | 1.1E-117   | 2.786E-115 |
| DACH2   | ENSG00000126733 | protein_coding | 21.1078558 | -3.1997616 | 0.23558278 | -13.582324 | 5.0983E-42 | 8.6272E-41 |
| HSPA2   | ENSG00000126803 | protein_coding | 3024.51117 | -3.891516  | 0.14717147 | -26.442054 | 4.503E-154 | 3.753E-151 |
| SGPP1   | ENSG00000126821 | protein_coding | 2220.67044 | -1.2788588 | 0.08159639 | -15.672981 | 2.3146E-55 | 6.6565E-54 |
| PLEKHG3 | ENSG00000126822 | protein_coding | 2784.08829 | -1.0296021 | 0.08142587 | -12.644657 | 1.1975E-36 | 1.6308E-35 |
| PRDM7   | ENSG00000126856 | protein_coding | 3.06493086 | -2.2527039 | 0.2552929  | -8.8239975 | 1.1044E-18 | 5.9796E-18 |
| AIF1L   | ENSG00000126878 | protein_coding | 15169.963  | -3.2205474 | 0.1649717  | -19.521818 | 7.1644E-85 | 5.9497E-83 |
| AVPR2   | ENSG00000126895 | protein_coding | 200.941079 | -3.4188787 | 0.19023603 | -17.971772 | 3.2419E-72 | 1.6888E-70 |
| OMD     | ENSG00000127083 | protein_coding | 107.086611 | -1.0251923 | 0.2307467  | -4.4429336 | 8.8741E-06 | 1.8557E-05 |
| TSPAN8  | ENSG00000127324 | protein_coding | 641.1903   | -3.9080059 | 0.28797298 | -13.570738 | 5.9718E-42 | 1.0083E-40 |
| TRPV5   | ENSG00000127412 | protein_coding | 35.4462873 | -5.1317809 | 0.28152882 | -18.228262 | 3.0796E-74 | 1.7385E-72 |
| ECHS1   | ENSG00000127884 | protein_coding | 10458.0231 | -1.332123  | 0.08913093 | -14.945687 | 1.6617E-50 | 4.0197E-49 |
| FGL2    | ENSG00000127951 | protein_coding | 6497.18074 | -1.0078015 | 0.11576828 | -8.7053338 | 3.1664E-18 | 1.6686E-17 |
| GNAI1   | ENSG00000127955 | protein_coding | 3046.16516 | -1.2198298 | 0.08442284 | -14.44905  | 2.5417E-47 | 5.3816E-46 |
| RASL11B | ENSG00000128045 | protein_coding | 373.191232 | -4.2679261 | 0.23117692 | -18.461731 | 4.1968E-76 | 2.5685E-74 |
| TST     | ENSG00000128311 | protein_coding | 2533.29632 | -1.0654206 | 0.12950105 | -8.2271194 | 1.9177E-16 | 9.0265E-16 |
| PODXL   | ENSG00000128567 | protein_coding | 22163.3314 | -1.3731886 | 0.12144922 | -11.306689 | 1.2159E-29 | 1.1869E-28 |
| HOXD1   | ENSG00000128645 | protein_coding | 53.3634825 | -1.2247414 | 0.15541481 | -7.8804674 | 3.2616E-15 | 1.4194E-14 |
| HOXD3   | ENSG00000128652 | protein_coding | 165.228881 | -1.100523  | 0.10163329 | -10.828371 | 2.5261E-27 | 2.194E-26  |
| HOXD10  | ENSG00000128710 | protein_coding | 769.008837 | -1.3346909 | 0.14235581 | -9.3757389 | 6.8693E-21 | 4.2053E-20 |
| SNRPN   | ENSG00000128739 | protein_coding | 4147.89542 | -1.2151393 | 0.07327171 | -16.584016 | 9.0943E-62 | 3.2443E-60 |
| TWSG1   | ENSG00000128791 | protein_coding | 3984.76698 | -1.1649251 | 0.08649953 | -13.467416 | 2.4323E-41 | 4.0166E-40 |
| MYO5C   | ENSG00000128833 | protein_coding | 1155.01252 | -1.2860015 | 0.08939517 | -14.385582 | 6.374E-47  | 1.3275E-45 |

|         |                 |                |            |            |            |            |            |            |
|---------|-----------------|----------------|------------|------------|------------|------------|------------|------------|
| CGNL1   | ENSG00000128849 | protein_coding | 8390.86402 | -2.1204967 | 0.14667522 | -14.457089 | 2.2616E-47 | 4.7998E-46 |
| ALDH1A2 | ENSG00000128918 | protein_coding | 1227.83963 | -1.6720636 | 0.23935411 | -6.9857319 | 2.8337E-12 | 1.0097E-11 |
| CHAC1   | ENSG00000128965 | protein_coding | 183.394458 | -1.9178302 | 0.18067115 | -10.615032 | 2.5371E-26 | 2.0865E-25 |
| SHBG    | ENSG00000129214 | protein_coding | 34.9379316 | -2.3349877 | 0.13996323 | -16.682866 | 1.7464E-62 | 6.3789E-61 |
| AP1M2   | ENSG00000129354 | protein_coding | 1306.85326 | -2.461664  | 0.17701872 | -13.906235 | 5.8056E-44 | 1.0731E-42 |
| NRL     | ENSG00000129535 | protein_coding | 104.364779 | -1.166125  | 0.08871438 | -13.144712 | 1.825E-39  | 2.7914E-38 |
| CDO1    | ENSG00000129596 | protein_coding | 78.1419481 | -1.9283162 | 0.18909677 | -10.19751  | 2.0342E-24 | 1.5101E-23 |
| FOXJ1   | ENSG00000129654 | protein_coding | 83.3164348 | -3.1738768 | 0.27936273 | -11.361132 | 6.5293E-30 | 6.4451E-29 |
| CDKN1C  | ENSG00000129757 | protein_coding | 1673.95101 | -1.52731   | 0.12737379 | -11.990772 | 3.9719E-33 | 4.5771E-32 |
| LDLR    | ENSG00000130164 | protein_coding | 1402.96952 | -1.2592565 | 0.16885394 | -7.4576675 | 8.8068E-14 | 3.4854E-13 |
| DPP6    | ENSG00000130226 | protein_coding | 214.089038 | -3.3780445 | 0.28943178 | -11.671298 | 1.7868E-31 | 1.9004E-30 |
| ACSBG2  | ENSG00000130377 | protein_coding | 23.6950203 | -1.8370078 | 0.14886061 | -12.340456 | 5.4844E-35 | 6.8918E-34 |
| STK33   | ENSG00000130413 | protein_coding | 285.436885 | -1.6275753 | 0.23118318 | -7.0401978 | 1.9197E-12 | 6.9264E-12 |
| GDF15   | ENSG00000130513 | protein_coding | 4929.84451 | -1.1608018 | 0.15978341 | -7.2648454 | 3.7347E-13 | 1.413E-12  |
| GATA5   | ENSG00000130700 | protein_coding | 41.7329478 | -2.170178  | 0.22226177 | -9.7640633 | 1.6059E-22 | 1.0728E-21 |
| RBBP8NL | ENSG00000130701 | protein_coding | 16.802553  | -3.2175924 | 0.48233311 | -6.6708926 | 2.5425E-11 | 8.4685E-11 |
| ASS1    | ENSG00000130707 | protein_coding | 13863.6369 | -2.7380034 | 0.14187808 | -19.298284 | 5.5523E-83 | 4.2491E-81 |
| DUSP9   | ENSG00000130829 | protein_coding | 946.701601 | -6.8150304 | 0.29477183 | -23.11968  | 2.936E-118 | 7.646E-116 |
| ZNF331  | ENSG00000130844 | protein_coding | 1629.19099 | -1.2068748 | 0.09687364 | -12.458237 | 1.2613E-35 | 1.6375E-34 |
| SLC7A10 | ENSG00000130876 | protein_coding | 19.279325  | -1.4924477 | 0.28809194 | -5.1804563 | 2.2134E-07 | 5.3711E-07 |
| CASZ1   | ENSG00000130940 | protein_coding | 397.209011 | -2.0335507 | 0.10822656 | -18.789757 | 9.1599E-79 | 6.1299E-77 |
| FBP2    | ENSG00000130957 | protein_coding | 3.91083987 | -1.517302  | 0.22506022 | -6.7417601 | 1.5648E-11 | 5.2872E-11 |
| PRRG1   | ENSG00000130962 | protein_coding | 1329.37194 | -1.2708636 | 0.08968355 | -14.170533 | 1.3944E-45 | 2.7469E-44 |
| RGN     | ENSG00000130988 | protein_coding | 1092.10953 | -1.4450503 | 0.12253816 | -11.792656 | 4.259E-32  | 4.6673E-31 |
| SYNE1   | ENSG00000131018 | protein_coding | 8640.69568 | -1.0047737 | 0.0897372  | -11.196848 | 4.225E-29  | 4.0182E-28 |



|           |                 |                |            |            |            |            |            |            |
|-----------|-----------------|----------------|------------|------------|------------|------------|------------|------------|
| EPS8L1    | ENSG00000131037 | protein_coding | 589.854963 | -1.5442073 | 0.21728028 | -7.1069831 | 1.1861E-12 | 4.3434E-12 |
| SLC34A1   | ENSG00000131183 | protein_coding | 1729.18183 | -4.4414015 | 0.33015016 | -13.452671 | 2.9695E-41 | 4.8825E-40 |
| RAB11FIP4 | ENSG00000131242 | protein_coding | 1201.29765 | -1.9599831 | 0.10273093 | -19.078802 | 3.7884E-81 | 2.7566E-79 |
| NAPSA     | ENSG00000131400 | protein_coding | 1785.95713 | -1.1663371 | 0.22822373 | -5.1104987 | 3.2131E-07 | 7.6903E-07 |
| G6PC      | ENSG00000131482 | protein_coding | 1207.46849 | -3.530568  | 0.30038583 | -11.753444 | 6.7798E-32 | 7.3561E-31 |
| TNS4      | ENSG00000131746 | protein_coding | 90.7910616 | -2.2646445 | 0.22959316 | -9.8637284 | 5.9787E-23 | 4.0796E-22 |
| PPP1R1B   | ENSG00000131771 | protein_coding | 77.2977049 | -3.7519361 | 0.30025933 | -12.495652 | 7.8847E-36 | 1.0309E-34 |
| FMO5      | ENSG00000131781 | protein_coding | 719.742766 | -2.4523606 | 0.14646075 | -16.744149 | 6.2477E-63 | 2.3134E-61 |
| FSHB      | ENSG00000131808 | protein_coding | 0.5280803  | -3.6417029 | 0.48244374 | -7.5484508 | 4.4047E-14 | 1.7784E-13 |
| PDHA1     | ENSG00000131828 | protein_coding | 5167.12317 | -1.1545986 | 0.07770034 | -14.859634 | 6.0254E-50 | 1.4274E-48 |
| ZNF132    | ENSG00000131849 | protein_coding | 309.593692 | -1.011112  | 0.08652942 | -11.685182 | 1.5175E-31 | 1.622E-30  |
| NR0B2     | ENSG00000131910 | protein_coding | 219.688016 | -2.7096644 | 0.5199838  | -5.2110553 | 1.8777E-07 | 4.5885E-07 |
| GCH1      | ENSG00000131979 | protein_coding | 754.593904 | -1.1287509 | 0.09448711 | -11.946083 | 6.8058E-33 | 7.7434E-32 |
| RAP1GAP2  | ENSG00000132359 | protein_coding | 1249.71109 | -1.2501969 | 0.11922242 | -10.486257 | 9.9908E-26 | 7.9733E-25 |
| DDC       | ENSG00000132437 | protein_coding | 4749.3436  | -1.7394757 | 0.21732117 | -8.0041705 | 1.2027E-15 | 5.3943E-15 |
| ENAM      | ENSG00000132464 | protein_coding | 592.465158 | -1.7377671 | 0.1999264  | -8.6920339 | 3.5601E-18 | 1.869E-17  |
| MATN2     | ENSG00000132561 | protein_coding | 3027.39975 | -1.1393811 | 0.12186796 | -9.3493079 | 8.8223E-21 | 5.3694E-20 |
| RHBG      | ENSG00000132677 | protein_coding | 365.697123 | -2.0231139 | 0.44835708 | -4.5122826 | 6.4134E-06 | 1.3601E-05 |
| RAB25     | ENSG00000132698 | protein_coding | 477.6576   | -3.4284688 | 0.34794411 | -9.8535044 | 6.6195E-23 | 4.5108E-22 |
| ALDH3B2   | ENSG00000132746 | protein_coding | 25.9482612 | -3.883524  | 0.31340317 | -12.391463 | 2.9069E-35 | 3.7067E-34 |
| ANGPTL3   | ENSG00000132855 | protein_coding | 831.638175 | -1.7695498 | 0.28199682 | -6.2750699 | 3.4948E-10 | 1.0693E-09 |
| SYT4      | ENSG00000132872 | protein_coding | 4.21923782 | -1.6015809 | 0.33114699 | -4.836465  | 1.3217E-06 | 2.9892E-06 |
| SLC14A2   | ENSG00000132874 | protein_coding | 468.4272   | -6.3910899 | 0.29730549 | -21.49671  | 1.671E-102 | 2.806E-100 |
| NMUR2     | ENSG00000132911 | protein_coding | 9.0257992  | -3.4260127 | 0.29332096 | -11.680081 | 1.6114E-31 | 1.7187E-30 |
| WASF3     | ENSG00000132970 | protein_coding | 649.506761 | -1.5564452 | 0.10647256 | -14.618275 | 2.1477E-48 | 4.7747E-47 |

|        |                 |                |            |            |            |            |            |            |
|--------|-----------------|----------------|------------|------------|------------|------------|------------|------------|
| GPR12  | ENSG00000132975 | protein_coding | 1.92282427 | -3.5648433 | 0.30759469 | -11.589418 | 4.6629E-31 | 4.858E-30  |
| MYH10  | ENSG00000133026 | protein_coding | 6205.69067 | -1.7454643 | 0.11771812 | -14.82749  | 9.7303E-50 | 2.2804E-48 |
| MYBPH  | ENSG00000133055 | protein_coding | 17.1818695 | -3.2175776 | 0.21247621 | -15.143237 | 8.3977E-52 | 2.141E-50  |
| LGR6   | ENSG00000133067 | protein_coding | 67.5250758 | -1.5999587 | 0.13553899 | -11.804417 | 3.7035E-32 | 4.0737E-31 |
| TMCC2  | ENSG00000133069 | protein_coding | 227.683121 | -1.0550444 | 0.1004986  | -10.498101 | 8.8136E-26 | 7.0547E-25 |
| KL     | ENSG00000133116 | protein_coding | 6612.77296 | -1.6375505 | 0.16024958 | -10.218751 | 1.6343E-24 | 1.2174E-23 |
| IRS4   | ENSG00000133124 | protein_coding | 1.02250291 | -2.9329833 | 0.37322376 | -7.8585118 | 3.8872E-15 | 1.6843E-14 |
| BEX2   | ENSG00000133134 | protein_coding | 1058.05877 | -1.0383699 | 0.15468234 | -6.7129182 | 1.9077E-11 | 6.4076E-11 |
| EPHB2  | ENSG00000133216 | protein_coding | 529.935712 | -1.0190007 | 0.15772657 | -6.460552  | 1.0432E-10 | 3.3182E-10 |
| PLAAT2 | ENSG00000133328 | protein_coding | 79.2238408 | -2.0743122 | 0.17387673 | -11.929786 | 8.2786E-33 | 9.3726E-32 |
| FAM83F | ENSG00000133477 | protein_coding | 575.569249 | -1.0311016 | 0.29287685 | -3.5205978 | 0.00043058 | 0.00075658 |
| NTS    | ENSG00000133636 | protein_coding | 85.4461022 | -1.0935475 | 0.23827988 | -4.5893403 | 4.4465E-06 | 9.5808E-06 |
| DUSP26 | ENSG00000133878 | protein_coding | 46.0195011 | -2.6854975 | 0.22593345 | -11.886232 | 1.3956E-32 | 1.5635E-31 |
| MRO    | ENSG00000134042 | protein_coding | 524.218943 | -2.9999783 | 0.15802635 | -18.984039 | 2.3113E-80 | 1.6351E-78 |
| CHL1   | ENSG00000134121 | protein_coding | 895.766488 | -3.3330059 | 0.23496741 | -14.184971 | 1.1351E-45 | 2.2526E-44 |
| REG4   | ENSG00000134193 | protein_coding | 3.82396934 | -1.0142558 | 0.28721446 | -3.5313535 | 0.00041344 | 0.00072785 |
| GSTM5  | ENSG00000134201 | protein_coding | 145.864379 | -1.2489315 | 0.18440112 | -6.7729065 | 1.2622E-11 | 4.2917E-11 |
| GSTM3  | ENSG00000134202 | protein_coding | 3365.74282 | -3.3152713 | 0.13300016 | -24.926822 | 3.81E-137  | 1.838E-134 |
| VAV3   | ENSG00000134215 | protein_coding | 5215.8249  | -1.3948216 | 0.0985534  | -14.152953 | 1.7908E-45 | 3.5112E-44 |
| CHIA   | ENSG00000134216 | protein_coding | 6.73120493 | -1.3316943 | 0.30870399 | -4.3138227 | 1.6046E-05 | 3.2724E-05 |
| HMGCS2 | ENSG00000134240 | protein_coding | 4242.48383 | -2.6455028 | 0.29408819 | -8.9956104 | 2.3492E-19 | 1.3219E-18 |
| SORT1  | ENSG00000134243 | protein_coding | 8112.01482 | -1.5291031 | 0.0873603  | -17.503409 | 1.3494E-68 | 6.1798E-67 |
| VTCN1  | ENSG00000134258 | protein_coding | 589.77853  | -3.4294537 | 0.3239037  | -10.587881 | 3.3918E-26 | 2.7731E-25 |
| GRHL1  | ENSG00000134317 | protein_coding | 221.124367 | -1.3378907 | 0.12669491 | -10.559941 | 4.5695E-26 | 3.712E-25  |
| MYCN   | ENSG00000134323 | protein_coding | 72.7463387 | -1.9274712 | 0.15413597 | -12.505006 | 7.0094E-36 | 9.1884E-35 |

|         |                 |                |            |            |            |            |            |            |
|---------|-----------------|----------------|------------|------------|------------|------------|------------|------------|
| CFHR4   | ENSG00000134365 | protein_coding | 3.10385917 | -1.9112115 | 0.39313052 | -4.8615189 | 1.1649E-06 | 2.6481E-06 |
| KCTD1   | ENSG00000134504 | protein_coding | 936.743918 | -1.9509781 | 0.1311549  | -14.875373 | 4.7632E-50 | 1.1308E-48 |
| FHOD3   | ENSG00000134775 | protein_coding | 1869.19216 | -1.243738  | 0.11388743 | -10.920766 | 9.1719E-28 | 8.1388E-27 |
| PDGFRA  | ENSG00000134853 | protein_coding | 1216.07925 | -2.3715799 | 0.2296494  | -10.326959 | 5.3221E-25 | 4.0648E-24 |
| GGACT   | ENSG00000134864 | protein_coding | 697.486506 | -2.3909007 | 0.15463617 | -15.461459 | 6.3152E-54 | 1.7294E-52 |
| CLDN10  | ENSG00000134873 | protein_coding | 2212.99602 | -2.308263  | 0.14126239 | -16.340251 | 5.1042E-60 | 1.7281E-58 |
| ADAMTS8 | ENSG00000134917 | protein_coding | 90.6933715 | -1.4144351 | 0.148196   | -9.5443539 | 1.3696E-21 | 8.7211E-21 |
| PSAT1   | ENSG00000135069 | protein_coding | 1664.55201 | -2.5102466 | 0.2348146  | -10.690334 | 1.1296E-26 | 9.4789E-26 |
| FBXO21  | ENSG00000135108 | protein_coding | 4820.1848  | -1.064441  | 0.07995325 | -13.313292 | 1.9375E-40 | 3.0797E-39 |
| TBX3    | ENSG00000135111 | protein_coding | 785.189122 | -1.8412317 | 0.12984037 | -14.180734 | 1.2058E-45 | 2.3856E-44 |
| BICDL1  | ENSG00000135127 | protein_coding | 3135.6182  | -2.0285535 | 0.14655612 | -13.841479 | 1.4323E-43 | 2.6096E-42 |
| DTX1    | ENSG00000135144 | protein_coding | 414.067135 | -2.4539773 | 0.14016011 | -17.508386 | 1.2365E-68 | 5.6683E-67 |
| ADGRB3  | ENSG00000135298 | protein_coding | 57.9861674 | -1.7135159 | 0.18894643 | -9.068792  | 1.2034E-19 | 6.8821E-19 |
| MRAP2   | ENSG00000135324 | protein_coding | 75.461521  | -3.3518971 | 0.22624165 | -14.815562 | 1.1621E-49 | 2.7139E-48 |
| CGA     | ENSG00000135346 | protein_coding | 18.9306809 | -1.5229337 | 0.4688726  | -3.2480756 | 0.00116188 | 0.00194778 |
| EHF     | ENSG00000135373 | protein_coding | 694.715729 | -5.2194413 | 0.28627324 | -18.232376 | 2.8564E-74 | 1.6145E-72 |
| ELF5    | ENSG00000135374 | protein_coding | 355.50719  | -7.8309376 | 0.29962349 | -26.135927 | 1.425E-150 | 1.053E-147 |
| GLS2    | ENSG00000135423 | protein_coding | 31.8315388 | -1.0749091 | 0.12083819 | -8.8954419 | 5.8187E-19 | 3.2033E-18 |
| KRT85   | ENSG00000135443 | protein_coding | 3.37870017 | -1.9986081 | 0.22873057 | -8.7378267 | 2.3764E-18 | 1.2602E-17 |
| PPP1R1A | ENSG00000135447 | protein_coding | 2937.53656 | -2.6616181 | 0.32150952 | -8.278505  | 1.2473E-16 | 5.9536E-16 |
| FAIM2   | ENSG00000135472 | protein_coding | 89.2621244 | -1.5795272 | 0.17959195 | -8.795089  | 1.4293E-18 | 7.6905E-18 |
| KRT7    | ENSG00000135480 | protein_coding | 3363.1253  | -1.6020721 | 0.2844993  | -5.6311988 | 1.7896E-08 | 4.7613E-08 |
| KCNH3   | ENSG00000135519 | protein_coding | 60.6733074 | -1.9732112 | 0.19771114 | -9.9802735 | 1.8595E-23 | 1.3054E-22 |
| NHSL1   | ENSG00000135540 | protein_coding | 1391.10943 | -1.2567697 | 0.08668294 | -14.498467 | 1.2389E-47 | 2.6525E-46 |
| EGR4    | ENSG00000135625 | protein_coding | 7.44566028 | -1.7379007 | 0.29137943 | -5.9643903 | 2.4555E-09 | 7.0228E-09 |

|         |                 |                |            |            |            |            |            |            |
|---------|-----------------|----------------|------------|------------|------------|------------|------------|------------|
| EMX1    | ENSG00000135638 | protein_coding | 1176.71955 | -2.6281525 | 0.13213399 | -19.890056 | 4.962E-88  | 4.6326E-86 |
| RGS8    | ENSG00000135824 | protein_coding | 6.1094758  | -1.217886  | 0.27232981 | -4.4720996 | 7.7455E-06 | 1.629E-05  |
| ITM2C   | ENSG00000135916 | protein_coding | 9594.0095  | -1.402421  | 0.11103179 | -12.630806 | 1.4281E-36 | 1.9357E-35 |
| WNT10A  | ENSG00000135925 | protein_coding | 119.133909 | -1.2438267 | 0.19819303 | -6.275835  | 3.4776E-10 | 1.0643E-09 |
| TSGA10  | ENSG00000135951 | protein_coding | 250.783466 | -1.0568682 | 0.08486769 | -12.453128 | 1.3447E-35 | 1.7443E-34 |
| EDAR    | ENSG00000135960 | protein_coding | 71.3309366 | -1.199044  | 0.23513546 | -5.0993754 | 3.4078E-07 | 8.1371E-07 |
| USP44   | ENSG00000136014 | protein_coding | 48.3762565 | -3.0303094 | 0.13409779 | -22.597758 | 4.559E-113 | 1.05E-110  |
| TBC1D4  | ENSG00000136111 | protein_coding | 3964.63624 | -1.4548099 | 0.1039701  | -13.992579 | 1.7302E-44 | 3.26E-43   |
| SUCLA2  | ENSG00000136143 | protein_coding | 2781.46303 | -1.0418523 | 0.07438207 | -14.006766 | 1.4171E-44 | 2.6789E-43 |
| LMO7    | ENSG00000136153 | protein_coding | 4489.74452 | -1.2203647 | 0.0989809  | -12.329295 | 6.2995E-35 | 7.8944E-34 |
| SCRN1   | ENSG00000136193 | protein_coding | 5571.50293 | -1.0355311 | 0.12689151 | -8.1607602 | 3.3292E-16 | 1.543E-15  |
| DGKB    | ENSG00000136267 | protein_coding | 53.3861469 | -1.4756039 | 0.16159857 | -9.1312933 | 6.7686E-20 | 3.9326E-19 |
| ZFHX2   | ENSG00000136367 | protein_coding | 202.46893  | -1.7544537 | 0.09444183 | -18.577084 | 4.9256E-77 | 3.123E-75  |
| ABHD17C | ENSG00000136379 | protein_coding | 664.893902 | -2.0426868 | 0.10288888 | -19.85333  | 1.0313E-87 | 9.4936E-86 |
| SCN2A   | ENSG00000136531 | protein_coding | 161.478274 | -3.0293574 | 0.24532213 | -12.348488 | 4.9635E-35 | 6.2475E-34 |
| SCN7A   | ENSG00000136546 | protein_coding | 55.0382379 | -4.0011095 | 0.28884671 | -13.852017 | 1.2369E-43 | 2.2581E-42 |
| IL36RN  | ENSG00000136695 | protein_coding | 0.74121594 | -1.0051616 | 0.3618652  | -2.7777238 | 0.00547411 | 0.00848368 |
| HS6ST1  | ENSG00000136720 | protein_coding | 2761.27788 | -2.1644344 | 0.08515051 | -25.418925 | 1.558E-142 | 8.025E-140 |
| RALGPS1 | ENSG00000136828 | protein_coding | 572.924183 | -1.913656  | 0.14025795 | -13.643832 | 2.1971E-42 | 3.7906E-41 |
| ALDOB   | ENSG00000136872 | protein_coding | 37884.0885 | -4.7373217 | 0.3200416  | -14.802206 | 1.4176E-49 | 3.2936E-48 |
| CTSV    | ENSG00000136943 | protein_coding | 177.710715 | -2.8762108 | 0.19128317 | -15.036402 | 4.2397E-51 | 1.046E-49  |
| LMX1B   | ENSG00000136944 | protein_coding | 105.704585 | -4.0981833 | 0.35430683 | -11.566763 | 6.0731E-31 | 6.2829E-30 |
| ALDH1B1 | ENSG00000137124 | protein_coding | 3007.03524 | -1.2849414 | 0.13341185 | -9.6313893 | 5.8927E-22 | 3.8289E-21 |
| GMPR    | ENSG00000137198 | protein_coding | 725.259147 | -2.288946  | 0.16832683 | -13.598225 | 4.1027E-42 | 6.9708E-41 |
| TFAP2A  | ENSG00000137203 | protein_coding | 431.38464  | -2.0376618 | 0.24656804 | -8.2640953 | 1.4076E-16 | 6.6907E-16 |

|          |                 |                |            |            |            |            |            |            |
|----------|-----------------|----------------|------------|------------|------------|------------|------------|------------|
| SLC22A7  | ENSG00000137204 | protein_coding | 527.859504 | -3.1567429 | 0.3045245  | -10.366138 | 3.5353E-25 | 2.731E-24  |
| HCRTR2   | ENSG00000137252 | protein_coding | 4.72412404 | -5.867876  | 0.30155246 | -19.45889  | 2.4504E-84 | 1.9916E-82 |
| GCM1     | ENSG00000137270 | protein_coding | 36.5785802 | -2.0194032 | 0.2502594  | -8.0692404 | 7.0737E-16 | 3.2144E-15 |
| BPHL     | ENSG00000137274 | protein_coding | 1495.02746 | -1.6097503 | 0.09038479 | -17.809968 | 5.9144E-71 | 2.9696E-69 |
| TUBB2B   | ENSG00000137285 | protein_coding | 226.639917 | -2.6009967 | 0.18990172 | -13.69654  | 1.0648E-42 | 1.8644E-41 |
| C6orf52  | ENSG00000137434 | protein_coding | 24.9053507 | -1.8710185 | 0.10227855 | -18.293363 | 9.3467E-75 | 5.3827E-73 |
| FGFBP1   | ENSG00000137440 | protein_coding | 14.4122801 | -3.0015763 | 0.41600959 | -7.2151613 | 5.387E-13  | 2.0162E-12 |
| TTC29    | ENSG00000137473 | protein_coding | 6.42587823 | -2.4094049 | 0.22571763 | -10.674421 | 1.3409E-26 | 1.1219E-25 |
| TTPA     | ENSG00000137561 | protein_coding | 17.7956268 | -3.3120629 | 0.28933691 | -11.447081 | 2.432E-30  | 2.4475E-29 |
| GGH      | ENSG00000137563 | protein_coding | 1208.03023 | -1.447417  | 0.1258183  | -11.504026 | 1.259E-30  | 1.2834E-29 |
| SORL1    | ENSG00000137642 | protein_coding | 11004.7508 | -1.0710021 | 0.12572579 | -8.5185551 | 1.6156E-17 | 8.1437E-17 |
| TMPRSS4  | ENSG00000137648 | protein_coding | 337.941068 | -3.7205263 | 0.31377804 | -11.857191 | 1.9749E-32 | 2.1979E-31 |
| TRIM29   | ENSG00000137699 | protein_coding | 231.075796 | -1.0613536 | 0.26119253 | -4.0634917 | 4.8344E-05 | 9.4112E-05 |
| POU2F3   | ENSG00000137709 | protein_coding | 47.2129404 | -2.098006  | 0.20095062 | -10.440406 | 1.6212E-25 | 1.2782E-24 |
| FDX1     | ENSG00000137714 | protein_coding | 1656.142   | -1.1257899 | 0.07067577 | -15.928936 | 3.9909E-57 | 1.2229E-55 |
| TMPRSS13 | ENSG00000137747 | protein_coding | 67.8199067 | -1.7061053 | 0.17839984 | -9.5633794 | 1.1397E-21 | 7.2909E-21 |
| UNC13C   | ENSG00000137766 | protein_coding | 68.7306997 | -2.0233926 | 0.30515186 | -6.6307724 | 3.3393E-11 | 1.1036E-10 |
| PAQR5    | ENSG00000137819 | protein_coding | 3352.33798 | -1.7853243 | 0.1136483  | -15.709204 | 1.3081E-55 | 3.8025E-54 |
| PAK6     | ENSG00000137843 | protein_coding | 13.6249633 | -3.3567659 | 0.27505357 | -12.204044 | 2.9576E-34 | 3.5906E-33 |
| SLC28A2  | ENSG00000137860 | protein_coding | 47.9616764 | -3.5507179 | 0.18275514 | -19.428826 | 4.4032E-84 | 3.5226E-82 |
| STRA6    | ENSG00000137868 | protein_coding | 197.092754 | -4.0451813 | 0.24107114 | -16.780032 | 3.4165E-63 | 1.2827E-61 |
| SEMA6D   | ENSG00000137872 | protein_coding | 1096.2359  | -2.94466   | 0.1455861  | -20.226245 | 5.752E-91  | 5.9791E-89 |
| BCL2L10  | ENSG00000137875 | protein_coding | 78.5319367 | -1.6551183 | 0.22403421 | -7.3877925 | 1.4929E-13 | 5.8207E-13 |
| GCOM1    | ENSG00000137878 | protein_coding | 32.5380339 | -1.3815357 | 0.3151006  | -4.3844272 | 1.1629E-05 | 2.405E-05  |
| BCAR3    | ENSG00000137936 | protein_coding | 1401.03517 | -1.0168199 | 0.07122296 | -14.276574 | 3.0629E-46 | 6.199E-45  |

|           |                 |                |            |            |            |            |            |            |
|-----------|-----------------|----------------|------------|------------|------------|------------|------------|------------|
| DBT       | ENSG00000137992 | protein_coding | 2281.5359  | -1.5566167 | 0.06383862 | -24.383622 | 2.552E-131 | 9.998E-129 |
| CYP1B1    | ENSG00000138061 | protein_coding | 3776.01006 | -1.3057353 | 0.18486587 | -7.0631494 | 1.6277E-12 | 5.9083E-12 |
| SIX3      | ENSG00000138083 | protein_coding | 5.05560665 | -1.4374255 | 0.30309604 | -4.7424752 | 2.1112E-06 | 4.6849E-06 |
| LOXL4     | ENSG00000138131 | protein_coding | 873.090806 | -1.1514861 | 0.13445841 | -8.5638836 | 1.0913E-17 | 5.5565E-17 |
| CH25H     | ENSG00000138135 | protein_coding | 125.703725 | -1.3079654 | 0.16058143 | -8.1451845 | 3.787E-16  | 1.7497E-15 |
| AOX1      | ENSG00000138356 | protein_coding | 5450.76363 | -1.4951552 | 0.20477667 | -7.3013939 | 2.848E-13  | 1.0865E-12 |
| GUCA1C    | ENSG00000138472 | protein_coding | 5.7990187  | -3.1820425 | 0.41231997 | -7.7174107 | 1.1872E-14 | 4.98E-14   |
| MNS1      | ENSG00000138587 | protein_coding | 464.933667 | -1.054806  | 0.11214664 | -9.4055969 | 5.1736E-21 | 3.1881E-20 |
| CILP      | ENSG00000138615 | protein_coding | 112.634056 | -1.6569475 | 0.2009897  | -8.2439424 | 1.6663E-16 | 7.8803E-16 |
| HCN4      | ENSG00000138622 | protein_coding | 24.4777706 | -1.329012  | 0.21742436 | -6.1125258 | 9.8066E-10 | 2.8981E-09 |
| ARHGAP24  | ENSG00000138639 | protein_coding | 4656.85153 | -1.643397  | 0.08640599 | -19.019479 | 1.1765E-80 | 8.4003E-79 |
| GPAT3     | ENSG00000138678 | protein_coding | 1847.26144 | -2.4754976 | 0.19349208 | -12.793793 | 1.7759E-37 | 2.5041E-36 |
| BMPR1B    | ENSG00000138696 | protein_coding | 829.317611 | -2.0194475 | 0.34683731 | -5.8224633 | 5.7987E-09 | 1.6057E-08 |
| FRAS1     | ENSG00000138759 | protein_coding | 3385.24931 | -1.2853678 | 0.15546278 | -8.2680098 | 1.3621E-16 | 6.48E-16   |
| CDKL2     | ENSG00000138769 | protein_coding | 397.855784 | -1.5959732 | 0.11895975 | -13.416078 | 4.8681E-41 | 7.933E-40  |
| SHROOM3   | ENSG00000138771 | protein_coding | 2031.15716 | -1.8638719 | 0.1581928  | -11.78228  | 4.8172E-32 | 5.269E-31  |
| ANXA3     | ENSG00000138772 | protein_coding | 839.803386 | -2.0017527 | 0.20856635 | -9.5976779 | 8.1766E-22 | 5.2725E-21 |
| HADH      | ENSG00000138796 | protein_coding | 3600.26402 | -1.7855534 | 0.08410435 | -21.230216 | 5.023E-100 | 7.452E-98  |
| EGF       | ENSG00000138798 | protein_coding | 3672.88485 | -5.4207386 | 0.24386561 | -22.228385 | 1.826E-109 | 3.839E-107 |
| MTTP      | ENSG00000138823 | protein_coding | 286.841241 | -1.7305217 | 0.31452218 | -5.5020658 | 3.7537E-08 | 9.7117E-08 |
| B4GALNT3  | ENSG00000139044 | protein_coding | 602.295681 | -2.2089698 | 0.20846712 | -10.59625  | 3.1017E-26 | 2.5386E-25 |
| ERP27     | ENSG00000139055 | protein_coding | 1047.57582 | -1.4493425 | 0.28058959 | -5.1653467 | 2.3999E-07 | 5.8062E-07 |
| GABARAPL1 | ENSG00000139112 | protein_coding | 8613.96909 | -1.5184604 | 0.11998903 | -12.654994 | 1.0498E-36 | 1.4332E-35 |
| PIK3C2G   | ENSG00000139144 | protein_coding | 176.612559 | -4.3583729 | 0.41027007 | -10.62318  | 2.325E-26  | 1.9176E-25 |
| PLCZ1     | ENSG00000139151 | protein_coding | 4.83908066 | -2.3787918 | 0.23574544 | -10.09051  | 6.0852E-24 | 4.3833E-23 |



|          |                 |                |            |            |            |            |            |            |
|----------|-----------------|----------------|------------|------------|------------|------------|------------|------------|
| SLC38A4  | ENSG00000139209 | protein_coding | 360.734449 | -1.7033422 | 0.28254293 | -6.0286138 | 1.6537E-09 | 4.7965E-09 |
| LGR5     | ENSG00000139292 | protein_coding | 58.1402511 | -2.5838014 | 0.31320833 | -8.2494658 | 1.591E-16  | 7.5416E-16 |
| PTPRQ    | ENSG00000139304 | protein_coding | 24.0004621 | -3.972558  | 0.31597904 | -12.57222  | 3.0017E-36 | 4.0071E-35 |
| LUM      | ENSG00000139329 | protein_coding | 5926.86624 | -1.2818972 | 0.24484556 | -5.235534  | 1.6451E-07 | 4.0377E-07 |
| FAM222A  | ENSG00000139438 | protein_coding | 291.313373 | -2.7436106 | 0.15957555 | -17.193176 | 2.9871E-66 | 1.2505E-64 |
| FOXN4    | ENSG00000139445 | protein_coding | 9.57144878 | -1.4908572 | 0.25973827 | -5.739844  | 9.4764E-09 | 2.5781E-08 |
| PDX1     | ENSG00000139515 | protein_coding | 0.77496361 | -2.7045729 | 0.4027603  | -6.7150932 | 1.8795E-11 | 6.3146E-11 |
| SUOX     | ENSG00000139531 | protein_coding | 2446.4936  | -1.076022  | 0.06293734 | -17.096718 | 1.57E-65   | 6.4088E-64 |
| GALNT6   | ENSG00000139629 | protein_coding | 532.936122 | -1.1713759 | 0.10164867 | -11.52377  | 1.0013E-30 | 1.0241E-29 |
| PELI2    | ENSG00000139946 | protein_coding | 922.251565 | -1.2440036 | 0.09482997 | -13.118253 | 2.5883E-39 | 3.9341E-38 |
| ARMH4    | ENSG00000139971 | protein_coding | 635.878954 | -3.5620502 | 0.15125045 | -23.550675 | 1.236E-122 | 3.726E-120 |
| RDH12    | ENSG00000139988 | protein_coding | 192.72738  | -2.0835135 | 0.22791275 | -9.1417153 | 6.1469E-20 | 3.5786E-19 |
| RAB15    | ENSG00000139998 | protein_coding | 800.688722 | -1.0261183 | 0.10933169 | -9.3853698 | 6.2696E-21 | 3.8439E-20 |
| KCNH5    | ENSG00000140015 | protein_coding | 3.75728118 | -1.1825882 | 0.37287862 | -3.1715097 | 0.00151649 | 0.00250829 |
| AK7      | ENSG00000140057 | protein_coding | 311.438667 | -1.5222204 | 0.11382129 | -13.373776 | 8.6059E-41 | 1.3832E-39 |
| FBLN5    | ENSG00000140092 | protein_coding | 4556.05152 | -1.7358089 | 0.16300759 | -10.648639 | 1.7693E-26 | 1.472E-25  |
| SLC25A47 | ENSG00000140107 | protein_coding | 9.5280712  | -2.4241106 | 0.19635362 | -12.345638 | 5.1425E-35 | 6.4657E-34 |
| SORD     | ENSG00000140263 | protein_coding | 1610.21566 | -2.195791  | 0.12217571 | -17.972402 | 3.2053E-72 | 1.6716E-70 |
| DUOXA2   | ENSG00000140274 | protein_coding | 3.3897434  | -1.062197  | 0.30241158 | -3.5124217 | 0.00044404 | 0.00077921 |
| SLC27A2  | ENSG00000140284 | protein_coding | 2796.98705 | -1.1074698 | 0.18651829 | -5.9375936 | 2.8924E-09 | 8.2215E-09 |
| FGF7     | ENSG00000140285 | protein_coding | 371.102165 | -1.0315278 | 0.26409247 | -3.9059343 | 9.3862E-05 | 0.00017723 |
| GCNT3    | ENSG00000140297 | protein_coding | 1159.45055 | -1.755613  | 0.18183939 | -9.6547452 | 4.6932E-22 | 3.063E-21  |
| CYP1A1   | ENSG00000140465 | protein_coding | 42.2472724 | -2.9117923 | 0.43229171 | -6.7357117 | 1.6313E-11 | 5.5034E-11 |
| CYP1A2   | ENSG00000140505 | protein_coding | 9.36664694 | -1.0545566 | 0.40201621 | -2.6231694 | 0.00871159 | 0.01314683 |
| RHCG     | ENSG00000140519 | protein_coding | 3785.44675 | -1.6810621 | 0.4701806  | -3.575354  | 0.00034975 | 0.00062057 |

|          |                 |                |            |            |            |            |            |            |
|----------|-----------------|----------------|------------|------------|------------|------------|------------|------------|
| SH3GL3   | ENSG00000140600 | protein_coding | 50.9245545 | -5.6356635 | 0.27696979 | -20.347575 | 4.8782E-92 | 5.3498E-90 |
| SLC5A2   | ENSG00000140675 | protein_coding | 337.626521 | -4.7308373 | 0.25620204 | -18.46526  | 3.9313E-76 | 2.4093E-74 |
| MYLK3    | ENSG00000140795 | protein_coding | 94.0909361 | -4.0672487 | 0.14821349 | -27.441826 | 8.697E-166 | 9.493E-163 |
| NKD1     | ENSG00000140807 | protein_coding | 115.613861 | -2.9217347 | 0.17488583 | -16.706526 | 1.1748E-62 | 4.3188E-61 |
| MARVELD3 | ENSG00000140832 | protein_coding | 577.437545 | -1.4501305 | 0.14772655 | -9.8163158 | 9.578E-23  | 6.4797E-22 |
| ADAD2    | ENSG00000140955 | protein_coding | 6.34509739 | -1.3730935 | 0.21424472 | -6.4089955 | 1.4648E-10 | 4.6049E-10 |
| ABCA8    | ENSG00000141338 | protein_coding | 571.388589 | -1.9873291 | 0.17332872 | -11.465665 | 1.9625E-30 | 1.9841E-29 |
| SLC14A1  | ENSG00000141469 | protein_coding | 1075.23753 | -2.9897925 | 0.17341943 | -17.240239 | 1.3249E-66 | 5.6079E-65 |
| SLC13A5  | ENSG00000141485 | protein_coding | 20.1703036 | -1.7201262 | 0.26616206 | -6.4627023 | 1.0285E-10 | 3.2743E-10 |
| SAT2     | ENSG00000141504 | protein_coding | 3095.05523 | -1.1578435 | 0.07692448 | -15.05169  | 3.3652E-51 | 8.3613E-50 |
| ZNF750   | ENSG00000141579 | protein_coding | 33.5761756 | -1.2339422 | 0.17943956 | -6.8766452 | 6.1278E-12 | 2.1316E-11 |
| MAPK4    | ENSG00000141639 | protein_coding | 205.370372 | -4.0768585 | 0.34843051 | -11.700636 | 1.265E-31  | 1.3568E-30 |
| CBLN2    | ENSG00000141668 | protein_coding | 38.7709572 | -3.0873377 | 0.26600568 | -11.606285 | 3.8289E-31 | 4.0028E-30 |
| ERBB2    | ENSG00000141736 | protein_coding | 9244.12095 | -1.4750265 | 0.08704371 | -16.945812 | 2.0666E-64 | 8.1108E-63 |
| GRB7     | ENSG00000141738 | protein_coding | 1205.15532 | -1.2254268 | 0.10712646 | -11.439068 | 2.6673E-30 | 2.6773E-29 |
| PNMT     | ENSG00000141744 | protein_coding | 16.3977477 | -2.4606231 | 0.27376269 | -8.9881609 | 2.514E-19  | 1.4123E-18 |
| MISP3    | ENSG00000141854 | protein_coding | 457.127729 | -1.6817742 | 0.13077562 | -12.859998 | 7.5579E-38 | 1.0807E-36 |
| HUNK     | ENSG00000142149 | protein_coding | 854.856923 | -1.7287091 | 0.13612823 | -12.699123 | 5.9796E-37 | 8.2415E-36 |
| DNMT3L   | ENSG00000142182 | protein_coding | 4.82016404 | -3.0220212 | 0.28621302 | -10.558643 | 4.6331E-26 | 3.7617E-25 |
| IL19     | ENSG00000142224 | protein_coding | 2.00095031 | -2.9577755 | 0.249724   | -11.844178 | 2.3067E-32 | 2.5622E-31 |
| LMTK3    | ENSG00000142235 | protein_coding | 183.35953  | -1.4725977 | 0.20060895 | -7.340638  | 2.1258E-13 | 8.1882E-13 |
| CBLC     | ENSG00000142273 | protein_coding | 130.311808 | -1.9419956 | 0.22051654 | -8.8065759 | 1.2903E-18 | 6.9609E-18 |
| MMEL1    | ENSG00000142606 | protein_coding | 32.2171642 | -1.4119148 | 0.19616095 | -7.1977362 | 6.122E-13  | 2.2844E-12 |
| PRDM16   | ENSG00000142611 | protein_coding | 485.363708 | -3.6878225 | 0.18738571 | -19.680383 | 3.1759E-86 | 2.789E-84  |
| CNKSR1   | ENSG00000142675 | protein_coding | 175.794915 | -2.5637583 | 0.22129654 | -11.585171 | 4.8999E-31 | 5.0979E-30 |

|          |                 |                |            |            |            |            |            |            |
|----------|-----------------|----------------|------------|------------|------------|------------|------------|------------|
| CYP4B1   | ENSG00000142973 | protein_coding | 72.5853964 | -1.5981116 | 0.18944565 | -8.4357262 | 3.2915E-17 | 1.6286E-16 |
| TMEM61   | ENSG00000143001 | protein_coding | 124.741706 | -2.8067781 | 0.38962615 | -7.2037723 | 5.8569E-13 | 2.1878E-12 |
| SYPL2    | ENSG00000143028 | protein_coding | 632.708275 | -1.3373612 | 0.12807828 | -10.441749 | 1.5984E-25 | 1.2607E-24 |
| IGSF3    | ENSG00000143061 | protein_coding | 2985.9825  | -1.1549621 | 0.09843972 | -11.732683 | 8.6667E-32 | 9.3568E-31 |
| ATP1B1   | ENSG00000143153 | protein_coding | 65622.4213 | -1.3667496 | 0.09016361 | -15.158551 | 6.6521E-52 | 1.7055E-50 |
| DPT      | ENSG00000143196 | protein_coding | 316.748219 | -2.1774185 | 0.2361891  | -9.2189624 | 2.9999E-20 | 1.771E-19  |
| NECTIN4  | ENSG00000143217 | protein_coding | 150.033086 | -1.9102983 | 0.25244121 | -7.5672995 | 3.8106E-14 | 1.5437E-13 |
| NR1I3    | ENSG00000143257 | protein_coding | 67.7549966 | -2.4647703 | 0.16588232 | -14.858547 | 6.1239E-50 | 1.4493E-48 |
| TUFT1    | ENSG00000143367 | protein_coding | 1624.72426 | -1.0313266 | 0.09862587 | -10.456958 | 1.3616E-25 | 1.0778E-24 |
| CGN      | ENSG00000143375 | protein_coding | 1468.31526 | -2.4379884 | 0.16459327 | -14.8122   | 1.2217E-49 | 2.8516E-48 |
| ANXA9    | ENSG00000143412 | protein_coding | 800.419703 | -1.9258921 | 0.09697427 | -19.859826 | 9.0623E-88 | 8.3924E-86 |
| SELENBP1 | ENSG00000143416 | protein_coding | 2713.99432 | -1.7249632 | 0.10161457 | -16.97555  | 1.2458E-64 | 4.9317E-63 |
| KCNH1    | ENSG00000143473 | protein_coding | 14.8889954 | -1.8402012 | 0.19940039 | -9.2286743 | 2.74E-20   | 1.6224E-19 |
| SUSD4    | ENSG00000143502 | protein_coding | 518.460137 | -3.6500118 | 0.21923399 | -16.648932 | 3.0805E-62 | 1.1199E-60 |
| SCCPDH   | ENSG00000143653 | protein_coding | 3585.50902 | -1.3337287 | 0.07975759 | -16.72228  | 9.0201E-63 | 3.3319E-61 |
| LEFTY2   | ENSG00000143768 | protein_coding | 20.3908172 | -1.2106232 | 0.25346655 | -4.7762642 | 1.7858E-06 | 3.9893E-06 |
| MBOAT2   | ENSG00000143797 | protein_coding | 1388.52065 | -1.5690146 | 0.09894795 | -15.856968 | 1.2582E-56 | 3.7723E-55 |
| ETNK2    | ENSG00000143845 | protein_coding | 2166.40134 | -1.730725  | 0.14561369 | -11.885729 | 1.404E-32  | 1.5717E-31 |
| GDF7     | ENSG00000143869 | protein_coding | 544.400929 | -1.5002116 | 0.14418854 | -10.404513 | 2.3646E-25 | 1.8476E-24 |
| ATP6V1C2 | ENSG00000143882 | protein_coding | 453.511202 | -2.1606503 | 0.2282824  | -9.4648132 | 2.9409E-21 | 1.8402E-20 |
| GALM     | ENSG00000143891 | protein_coding | 3444.44735 | -1.1935954 | 0.0828326  | -14.40973  | 4.4946E-47 | 9.4167E-46 |
| ABCG8    | ENSG00000143921 | protein_coding | 12.3746145 | -2.0780993 | 0.31637814 | -6.5684036 | 5.0858E-11 | 1.6558E-10 |
| SFXN5    | ENSG00000144040 | protein_coding | 1108.79481 | -1.263536  | 0.08725555 | -14.480867 | 1.6007E-47 | 3.4144E-46 |
| CNGA3    | ENSG00000144191 | protein_coding | 4.07426094 | -1.9441885 | 0.34746361 | -5.595373  | 2.2015E-08 | 5.8086E-08 |
| FAHD2B   | ENSG00000144199 | protein_coding | 227.702608 | -1.0545486 | 0.13362067 | -7.8921067 | 2.9713E-15 | 1.2966E-14 |

|         |                 |                |            |            |            |            |            |            |
|---------|-----------------|----------------|------------|------------|------------|------------|------------|------------|
| NXPH2   | ENSG00000144227 | protein_coding | 33.1198811 | -3.5297633 | 0.63551532 | -5.554175  | 2.7893E-08 | 7.2968E-08 |
| GRIP2   | ENSG00000144596 | protein_coding | 154.083943 | -1.0213627 | 0.16044939 | -6.3656374 | 1.9448E-10 | 6.0553E-10 |
| GADL1   | ENSG00000144644 | protein_coding | 32.0460705 | -4.4112407 | 0.25402298 | -17.365518 | 1.5053E-67 | 6.5972E-66 |
| POMGNT2 | ENSG00000144647 | protein_coding | 1002.07877 | -1.1306502 | 0.06730978 | -16.79771  | 2.5365E-63 | 9.5857E-62 |
| ACKR2   | ENSG00000144648 | protein_coding | 86.5838845 | -2.2680821 | 0.15608682 | -14.530901 | 7.7199E-48 | 1.666E-46  |
| GASK1A  | ENSG00000144649 | protein_coding | 67.5456566 | -1.490135  | 0.14570151 | -10.227314 | 1.4961E-24 | 1.117E-23  |
| CTDSPL  | ENSG00000144677 | protein_coding | 4156.19372 | -1.2040068 | 0.08395952 | -14.340325 | 1.2248E-46 | 2.5234E-45 |
| CAND2   | ENSG00000144712 | protein_coding | 214.470374 | -1.8266474 | 0.11865472 | -15.394645 | 1.778E-53  | 4.8113E-52 |
| TAGLN3  | ENSG00000144834 | protein_coding | 53.0780638 | -3.1765165 | 0.30931778 | -10.269428 | 9.6777E-25 | 7.2978E-24 |
| IGSF11  | ENSG00000144847 | protein_coding | 108.873358 | -2.9059508 | 0.23907396 | -12.155029 | 5.3943E-34 | 6.4767E-33 |
| ALDH1L1 | ENSG00000144908 | protein_coding | 6632.07847 | -1.1991411 | 0.18446777 | -6.5005455 | 8.0029E-11 | 2.5687E-10 |
| SPATA16 | ENSG00000144962 | protein_coding | 1.38098615 | -3.5367312 | 0.30253925 | -11.690156 | 1.4312E-31 | 1.5315E-30 |
| AMT     | ENSG00000145020 | protein_coding | 1141.84882 | -1.105466  | 0.10335065 | -10.696266 | 1.0596E-26 | 8.9078E-26 |
| NICN1   | ENSG00000145029 | protein_coding | 972.241798 | -1.0833387 | 0.06342169 | -17.081517 | 2.0375E-65 | 8.2803E-64 |
| EAF2    | ENSG00000145088 | protein_coding | 294.375069 | -1.1082364 | 0.11885463 | -9.3243011 | 1.1172E-20 | 6.7688E-20 |
| ILDR1   | ENSG00000145103 | protein_coding | 624.639448 | -2.0018381 | 0.14964784 | -13.376993 | 8.2415E-41 | 1.3261E-39 |
| SLIT2   | ENSG00000145147 | protein_coding | 1289.99727 | -1.1515158 | 0.2163636  | -5.3221325 | 1.0256E-07 | 2.5613E-07 |
| EPHA5   | ENSG00000145242 | protein_coding | 5.42103603 | -2.0942128 | 0.39774643 | -5.2651957 | 1.4004E-07 | 3.4551E-07 |
| CORIN   | ENSG00000145244 | protein_coding | 92.7836899 | -1.5293538 | 0.12629622 | -12.10926  | 9.4342E-34 | 1.1189E-32 |
| SCD5    | ENSG00000145284 | protein_coding | 2889.59364 | -1.7436174 | 0.19308192 | -9.0304542 | 1.7096E-19 | 9.6969E-19 |
| ANK2    | ENSG00000145362 | protein_coding | 5885.70057 | -2.1479921 | 0.17833555 | -12.044666 | 2.0691E-33 | 2.4141E-32 |
| FABP2   | ENSG00000145384 | protein_coding | 5.19213633 | -1.9013715 | 0.26203964 | -7.256045  | 3.9857E-13 | 1.5049E-12 |
| USP53   | ENSG00000145390 | protein_coding | 2376.66675 | -1.385822  | 0.09139753 | -15.162575 | 6.2567E-52 | 1.6077E-50 |
| GLRA3   | ENSG00000145451 | protein_coding | 6.08305157 | -1.8509016 | 0.30759295 | -6.0173734 | 1.7727E-09 | 5.1295E-09 |
| CDH18   | ENSG00000145526 | protein_coding | 12.0505489 | -2.1204383 | 0.43803932 | -4.8407488 | 1.2935E-06 | 2.9279E-06 |

|          |                 |                |            |            |            |            |            |            |
|----------|-----------------|----------------|------------|------------|------------|------------|------------|------------|
| ADAMTS16 | ENSG00000145536 | protein_coding | 293.444945 | -2.6780165 | 0.19462221 | -13.760077 | 4.4306E-43 | 7.8844E-42 |
| MYO10    | ENSG00000145555 | protein_coding | 4502.56433 | -1.1015648 | 0.11733986 | -9.3878139 | 6.1258E-21 | 3.7567E-20 |
| UGT3A1   | ENSG00000145626 | protein_coding | 2847.06891 | -1.3364779 | 0.27982145 | -4.7761811 | 1.7866E-06 | 3.9907E-06 |
| BHMT     | ENSG00000145692 | protein_coding | 16819.9631 | -1.3168494 | 0.18754583 | -7.0214805 | 2.1953E-12 | 7.8836E-12 |
| IQGAP2   | ENSG00000145703 | protein_coding | 3433.90142 | -1.1025935 | 0.12253009 | -8.9985527 | 2.2871E-19 | 1.2879E-18 |
| CRHBP    | ENSG00000145708 | protein_coding | 396.391297 | -4.0887634 | 0.20634337 | -19.815337 | 2.1953E-87 | 2.0007E-85 |
| LIX1     | ENSG00000145721 | protein_coding | 475.199106 | -1.7351378 | 0.30550279 | -5.6796138 | 1.35E-08   | 3.629E-08  |
| TSLP     | ENSG00000145777 | protein_coding | 41.0687863 | -1.1233186 | 0.18008201 | -6.2378169 | 4.4372E-10 | 1.3488E-09 |
| ADAMTS19 | ENSG00000145808 | protein_coding | 15.1466897 | -4.3253886 | 0.39850858 | -10.853941 | 1.9101E-27 | 1.6656E-26 |
| SLC25A48 | ENSG00000145832 | protein_coding | 266.400977 | -1.1066212 | 0.2128509  | -5.199044  | 2.0032E-07 | 4.881E-07  |
| GABRB2   | ENSG00000145864 | protein_coding | 81.8516894 | -1.8837329 | 0.22969296 | -8.2010912 | 2.3821E-16 | 1.1145E-15 |
| FAM217A  | ENSG00000145975 | protein_coding | 9.26144091 | -2.3750851 | 0.15860375 | -14.974962 | 1.0703E-50 | 2.6097E-49 |
| GFRA3    | ENSG00000146013 | protein_coding | 14.0088553 | -1.6265203 | 0.25630666 | -6.3459933 | 2.2099E-10 | 6.8487E-10 |
| KLHL3    | ENSG00000146021 | protein_coding | 755.139746 | -1.632161  | 0.18974024 | -8.6020815 | 7.8283E-18 | 4.0217E-17 |
| DCDC2    | ENSG00000146038 | protein_coding | 2718.89806 | -1.6610455 | 0.16354595 | -10.156445 | 3.1018E-24 | 2.2725E-23 |
| KAAG1    | ENSG00000146049 | protein_coding | 33.3897646 | -1.0872291 | 0.15466364 | -7.0296362 | 2.0707E-12 | 7.4515E-12 |
| MMUT     | ENSG00000146085 | protein_coding | 3257.78896 | -1.0813393 | 0.07851448 | -13.772482 | 3.7317E-43 | 6.6588E-42 |
| LGSN     | ENSG00000146166 | protein_coding | 45.4400955 | -2.0824855 | 0.21869277 | -9.5224253 | 1.6918E-21 | 1.0725E-20 |
| SCUBE3   | ENSG00000146197 | protein_coding | 387.016918 | -1.1374745 | 0.16971951 | -6.7020848 | 2.0547E-11 | 6.8841E-11 |
| CYP39A1  | ENSG00000146233 | protein_coding | 281.941071 | -1.671815  | 0.16786928 | -9.9590291 | 2.303E-23  | 1.6086E-22 |
| PRSS35   | ENSG00000146250 | protein_coding | 193.921232 | -2.1799492 | 0.19066234 | -11.43356  | 2.8421E-30 | 2.8515E-29 |
| FAXC     | ENSG00000146267 | protein_coding | 103.073633 | -1.625285  | 0.28429356 | -5.7169251 | 1.0847E-08 | 2.9361E-08 |
| RSPO3    | ENSG00000146374 | protein_coding | 198.518608 | -1.2689157 | 0.19696238 | -6.4424267 | 1.1758E-10 | 3.7228E-10 |
| SLC2A12  | ENSG00000146411 | protein_coding | 193.326107 | -3.3108551 | 0.22181312 | -14.926327 | 2.2217E-50 | 5.3518E-49 |
| SSC4D    | ENSG00000146700 | protein_coding | 153.126869 | -2.2403638 | 0.14581062 | -15.364888 | 2.8153E-53 | 7.5692E-52 |

|          |                 |                |            |            |            |            |            |            |
|----------|-----------------|----------------|------------|------------|------------|------------|------------|------------|
| ASB15    | ENSG00000146809 | protein_coding | 66.3201599 | -5.2459359 | 0.33360293 | -15.725089 | 1.0181E-55 | 2.9669E-54 |
| EPHA1    | ENSG00000146904 | protein_coding | 318.867043 | -1.5422556 | 0.11825617 | -13.04165  | 7.0906E-39 | 1.0539E-37 |
| ASB10    | ENSG00000146926 | protein_coding | 0.68787452 | -3.3711711 | 0.33614985 | -10.028775 | 1.1392E-23 | 8.0928E-23 |
| SYTL5    | ENSG00000147041 | protein_coding | 102.6645   | -1.5556639 | 0.24470169 | -6.3573893 | 2.0521E-10 | 6.378E-10  |
| AKAP4    | ENSG00000147081 | protein_coding | 1.82174506 | -2.3404062 | 0.19436203 | -12.041478 | 2.1507E-33 | 2.5058E-32 |
| ZNF157   | ENSG00000147117 | protein_coding | 14.9279763 | -1.2688684 | 0.12770368 | -9.9360359 | 2.9014E-23 | 2.0168E-22 |
| NXF3     | ENSG00000147206 | protein_coding | 15.0792592 | -1.1932582 | 0.17068948 | -6.9908124 | 2.733E-12  | 9.7481E-12 |
| RIPPLY1  | ENSG00000147223 | protein_coding | 26.4443788 | -2.8623878 | 0.1860852  | -15.382136 | 2.1571E-53 | 5.8168E-52 |
| GPC3     | ENSG00000147257 | protein_coding | 1431.72317 | -3.6417277 | 0.21733684 | -16.756145 | 5.1068E-63 | 1.9002E-61 |
| MFHAS1   | ENSG00000147324 | protein_coding | 1830.43284 | -1.1307454 | 0.09569786 | -11.815786 | 3.2351E-32 | 3.5692E-31 |
| SNTG1    | ENSG00000147481 | protein_coding | 11.5065996 | -1.9487834 | 0.41924783 | -4.648285  | 3.3471E-06 | 7.2942E-06 |
| CRH      | ENSG00000147571 | protein_coding | 3.14365218 | -1.2823656 | 0.47148245 | -2.7198586 | 0.00653098 | 0.01002904 |
| ADHFE1   | ENSG00000147576 | protein_coding | 502.789701 | -1.1784428 | 0.11013392 | -10.70009  | 1.0168E-26 | 8.5588E-26 |
| PMP2     | ENSG00000147588 | protein_coding | 8.57023494 | -2.4433579 | 0.44592464 | -5.4793068 | 4.27E-08   | 1.0996E-07 |
| SLC26A7  | ENSG00000147606 | protein_coding | 2146.48467 | -1.8347962 | 0.37991055 | -4.8295478 | 1.3684E-06 | 3.0905E-06 |
| PSKH2    | ENSG00000147613 | protein_coding | 2.89224346 | -4.1062492 | 0.48280998 | -8.5048971 | 1.8176E-17 | 9.1379E-17 |
| ATP6V0D2 | ENSG00000147614 | protein_coding | 3756.91729 | -1.1971317 | 0.43113784 | -2.7766797 | 0.00549173 | 0.00850839 |
| DPYS     | ENSG00000147647 | protein_coding | 3823.56489 | -1.4809334 | 0.1947214  | -7.605396  | 2.8403E-14 | 1.1603E-13 |
| MAL2     | ENSG00000147676 | protein_coding | 4637.10838 | -2.7246176 | 0.19196433 | -14.193353 | 1.0073E-45 | 2.0023E-44 |
| SLC39A4  | ENSG00000147804 | protein_coding | 929.699847 | -1.544389  | 0.14517326 | -10.638247 | 1.9782E-26 | 1.6401E-25 |
| AK3      | ENSG00000147853 | protein_coding | 4746.42384 | -1.4684541 | 0.07080736 | -20.738722 | 1.5499E-95 | 1.9519E-93 |
| CER1     | ENSG00000147869 | protein_coding | 1.56520638 | -2.7660863 | 0.30762282 | -8.9918112 | 2.4319E-19 | 1.367E-18  |
| NTRK2    | ENSG00000148053 | protein_coding | 2933.44687 | -2.0850844 | 0.1900381  | -10.971928 | 5.2148E-28 | 4.6836E-27 |
| IDNK     | ENSG00000148057 | protein_coding | 526.501837 | -1.1949093 | 0.09547233 | -12.515766 | 6.1215E-36 | 8.0521E-35 |
| SHC3     | ENSG00000148082 | protein_coding | 145.944186 | -1.5562872 | 0.146826   | -10.599534 | 2.9947E-26 | 2.4536E-25 |



|          |                 |                |            |            |            |            |            |            |
|----------|-----------------|----------------|------------|------------|------------|------------|------------|------------|
| AUH      | ENSG00000148090 | protein_coding | 1640.95155 | -1.1230409 | 0.09958272 | -11.277468 | 1.6956E-29 | 1.6461E-28 |
| PLPPR1   | ENSG00000148123 | protein_coding | 297.401216 | -4.20854   | 0.3444633  | -12.217673 | 2.5014E-34 | 3.048E-33  |
| CRB2     | ENSG00000148204 | protein_coding | 309.499052 | -2.9029746 | 0.23703561 | -12.246998 | 1.7433E-34 | 2.1396E-33 |
| ALAD     | ENSG00000148218 | protein_coding | 3749.4771  | -1.2968084 | 0.06699993 | -19.35537  | 1.8367E-83 | 1.4417E-81 |
| SLC25A25 | ENSG00000148339 | protein_coding | 1265.0576  | -1.8902299 | 0.1097235  | -17.227211 | 1.6596E-66 | 7.0054E-65 |
| LCN2     | ENSG00000148346 | protein_coding | 320.675058 | -1.5542867 | 0.35724162 | -4.3507997 | 1.3564E-05 | 2.7874E-05 |
| PROSER2  | ENSG00000148426 | protein_coding | 657.076629 | -1.128498  | 0.12490055 | -9.0351726 | 1.6374E-19 | 9.306E-19  |
| FAM171A1 | ENSG00000148468 | protein_coding | 2436.80936 | -2.1814236 | 0.09855633 | -22.133775 | 1.495E-108 | 3.019E-106 |
| PLEKHS1  | ENSG00000148735 | protein_coding | 74.6652338 | -1.0515039 | 0.30281745 | -3.4724018 | 0.00051582 | 0.00089867 |
| CYP17A1  | ENSG00000148795 | protein_coding | 990.507574 | -1.9631541 | 0.34441424 | -5.6999796 | 1.1982E-08 | 3.2335E-08 |
| NKX6-2   | ENSG00000148826 | protein_coding | 1.20960039 | -3.0489347 | 0.24289329 | -12.552568 | 3.8482E-36 | 5.1073E-35 |
| CNNM2    | ENSG00000148842 | protein_coding | 1412.88853 | -1.0560859 | 0.07221576 | -14.624036 | 1.9735E-48 | 4.398E-47  |
| SLC5A12  | ENSG00000148942 | protein_coding | 7210.06765 | -1.5819406 | 0.25945134 | -6.0972534 | 1.0791E-09 | 3.1782E-09 |
| GLYAT    | ENSG00000149124 | protein_coding | 4393.8156  | -1.5300453 | 0.19761533 | -7.7425436 | 9.7447E-15 | 4.1126E-14 |
| SLC43A1  | ENSG00000149150 | protein_coding | 505.559595 | -1.295697  | 0.14036129 | -9.2311566 | 2.6773E-20 | 1.586E-19  |
| CAPN5    | ENSG00000149260 | protein_coding | 1949.94045 | -1.0828252 | 0.09422464 | -11.491954 | 1.448E-30  | 1.4751E-29 |
| HTR3B    | ENSG00000149305 | protein_coding | 6.20237205 | -2.6909351 | 0.51909775 | -5.1838697 | 2.1733E-07 | 5.2765E-07 |
| ST14     | ENSG00000149418 | protein_coding | 4575.40375 | -1.2243685 | 0.17765498 | -6.8918334 | 5.5078E-12 | 1.9213E-11 |
| SLC22A8  | ENSG00000149452 | protein_coding | 2524.68245 | -6.1500703 | 0.35274353 | -17.434963 | 4.4785E-68 | 2.0029E-66 |
| TKFC     | ENSG00000149476 | protein_coding | 2872.26134 | -1.2491826 | 0.07321572 | -17.061671 | 2.8625E-65 | 1.1592E-63 |
| SCN2B    | ENSG00000149575 | protein_coding | 53.3200017 | -2.2758101 | 0.29355712 | -7.752529  | 9.008E-15  | 3.8094E-14 |
| TMEM25   | ENSG00000149582 | protein_coding | 1198.38277 | -1.2337031 | 0.10740327 | -11.486644 | 1.5398E-30 | 1.5661E-29 |
| DUSP15   | ENSG00000149599 | protein_coding | 526.429286 | -1.1867024 | 0.25338164 | -4.6834584 | 2.8207E-06 | 6.189E-06  |
| CNTN5    | ENSG00000149972 | protein_coding | 26.6335943 | -2.5237542 | 0.28693527 | -8.7955524 | 1.4235E-18 | 7.6615E-18 |
| MPP7     | ENSG00000150054 | protein_coding | 897.756857 | -2.7834337 | 0.15998034 | -17.398599 | 8.4546E-68 | 3.7374E-66 |

|          |                 |                |            |            |            |            |            |            |
|----------|-----------------|----------------|------------|------------|------------|------------|------------|------------|
| FXVD4    | ENSG00000150201 | protein_coding | 1746.79366 | -6.1644654 | 0.47249132 | -13.046727 | 6.6336E-39 | 9.8795E-38 |
| PCDH15   | ENSG00000150275 | protein_coding | 18.6337558 | -3.9615092 | 0.40360229 | -9.8153783 | 9.6675E-23 | 6.5393E-22 |
| CTF1     | ENSG00000150281 | protein_coding | 374.200623 | -1.1767569 | 0.12475898 | -9.4322425 | 4.0141E-21 | 2.4917E-20 |
| KLHL1    | ENSG00000150361 | protein_coding | 2.97719307 | -3.170298  | 0.42677793 | -7.4284488 | 1.0988E-13 | 4.3232E-13 |
| FAM124A  | ENSG00000150510 | protein_coding | 465.690432 | -1.1407547 | 0.14071643 | -8.1067628 | 5.1986E-16 | 2.3817E-15 |
| LYPD6B   | ENSG00000150556 | protein_coding | 190.453184 | -2.7243119 | 0.34926718 | -7.80008   | 6.1868E-15 | 2.6444E-14 |
| CNDP1    | ENSG00000150656 | protein_coding | 113.207081 | -1.2318853 | 0.19650908 | -6.2688467 | 3.6373E-10 | 1.1117E-09 |
| DLG2     | ENSG00000150672 | protein_coding | 253.23181  | -1.1817672 | 0.1689994  | -6.9927302 | 2.6959E-12 | 9.621E-12  |
| PPP1R1C  | ENSG00000150722 | protein_coding | 31.2222284 | -1.643252  | 0.26062716 | -6.3049915 | 2.8821E-10 | 8.8676E-10 |
| C11orf53 | ENSG00000150750 | protein_coding | 12.8116975 | -1.2642691 | 0.57731286 | -2.1899201 | 0.02853003 | 0.03999282 |
| FREM2    | ENSG00000150893 | protein_coding | 1874.35169 | -1.6944039 | 0.17919549 | -9.4556168 | 3.2112E-21 | 2.0044E-20 |
| THRB     | ENSG00000151090 | protein_coding | 1111.10791 | -1.8944085 | 0.13673795 | -13.8543   | 1.1982E-43 | 2.1883E-42 |
| TMEM86A  | ENSG00000151117 | protein_coding | 965.82389  | -1.4099183 | 0.10110269 | -13.945409 | 3.3552E-44 | 6.2523E-43 |
| BTBD11   | ENSG00000151136 | protein_coding | 453.12038  | -1.4540502 | 0.21879516 | -6.6457145 | 3.0175E-11 | 1E-10      |
| ANK3     | ENSG00000151150 | protein_coding | 5078.11782 | -1.3396036 | 0.1363339  | -9.825902  | 8.7091E-23 | 5.9041E-22 |
| ALLC     | ENSG00000151360 | protein_coding | 6.18150562 | -1.3616337 | 0.2828927  | -4.8132514 | 1.4849E-06 | 3.3437E-06 |
| ATP6V1G3 | ENSG00000151418 | protein_coding | 308.554904 | -1.7210764 | 0.73342972 | -2.3466139 | 0.01894487 | 0.0272541  |
| PTPRO    | ENSG00000151490 | protein_coding | 1144.97842 | -3.2056759 | 0.16023242 | -20.006413 | 4.8427E-89 | 4.7032E-87 |
| ACAD8    | ENSG00000151498 | protein_coding | 1637.66739 | -1.1006642 | 0.06249375 | -17.612387 | 1.9792E-69 | 9.2864E-68 |
| NR3C2    | ENSG00000151623 | protein_coding | 1444.71691 | -1.9982644 | 0.14476287 | -13.803708 | 2.4207E-43 | 4.3559E-42 |
| AKR1C2   | ENSG00000151632 | protein_coding | 575.552144 | -1.1543974 | 0.20014435 | -5.7678243 | 8.0301E-09 | 2.1969E-08 |
| ITIH2    | ENSG00000151655 | protein_coding | 51.7213295 | -1.2635356 | 0.19769812 | -6.3912374 | 1.6455E-10 | 5.1538E-10 |
| ASAP2    | ENSG00000151693 | protein_coding | 1876.837   | -1.1771484 | 0.10208066 | -11.531552 | 9.148E-31  | 9.3689E-30 |
| KCNJ1    | ENSG00000151704 | protein_coding | 3601.47828 | -6.2763965 | 0.30641619 | -20.48324  | 3.0376E-93 | 3.5342E-91 |
| TMEM45B  | ENSG00000151715 | protein_coding | 567.307883 | -3.9092541 | 0.18469654 | -21.165822 | 1.973E-99  | 2.8445E-97 |

|          |                 |                |            |            |            |            |            |            |
|----------|-----------------|----------------|------------|------------|------------|------------|------------|------------|
| SLC25A4  | ENSG00000151729 | protein_coding | 4054.85525 | -1.1188385 | 0.10544766 | -10.610368 | 2.667E-26  | 2.1918E-25 |
| ZNF385D  | ENSG00000151789 | protein_coding | 260.113977 | -1.3010028 | 0.15414511 | -8.4401174 | 3.1702E-17 | 1.5697E-16 |
| GABRA2   | ENSG00000151834 | protein_coding | 233.589808 | -4.8179792 | 0.44830155 | -10.747184 | 6.1099E-27 | 5.2021E-26 |
| TLCD4    | ENSG00000152078 | protein_coding | 908.594979 | -1.132645  | 0.12290398 | -9.21569   | 3.0928E-20 | 1.824E-19  |
| TMEM178A | ENSG00000152154 | protein_coding | 335.90666  | -3.2234834 | 0.16433983 | -19.614742 | 1.1572E-85 | 9.9156E-84 |
| ATP5F1A  | ENSG00000152234 | protein_coding | 30139.2157 | -1.2323378 | 0.09315232 | -13.229277 | 5.9457E-40 | 9.2298E-39 |
| SH2D6    | ENSG00000152292 | protein_coding | 20.9518983 | -1.5015772 | 0.20222896 | -7.4251343 | 1.1267E-13 | 4.4298E-13 |
| KCNK13   | ENSG00000152315 | protein_coding | 193.737745 | -2.6379262 | 0.12925575 | -20.408579 | 1.4031E-92 | 1.5881E-90 |
| JMY      | ENSG00000152409 | protein_coding | 1315.46905 | -1.191317  | 0.09335036 | -12.761783 | 2.68E-37   | 3.7524E-36 |
| HOMER1   | ENSG00000152413 | protein_coding | 504.688476 | -2.198657  | 0.12827298 | -17.140453 | 7.4071E-66 | 3.0507E-64 |
| OLAH     | ENSG00000152463 | protein_coding | 13.0429012 | -1.2345184 | 0.14986371 | -8.2376071 | 1.7569E-16 | 8.296E-16  |
| IGSF10   | ENSG00000152580 | protein_coding | 57.2211039 | -2.7429601 | 0.18410663 | -14.898758 | 3.3576E-50 | 8.0165E-49 |
| CAPSL    | ENSG00000152611 | protein_coding | 9.47213992 | -2.8471708 | 0.24369859 | -11.683165 | 1.554E-31  | 1.659E-30  |
| GPD1L    | ENSG00000152642 | protein_coding | 2313.86204 | -1.4788249 | 0.1389419  | -10.643477 | 1.8702E-26 | 1.5542E-25 |
| CCNO     | ENSG00000152669 | protein_coding | 71.5517435 | -1.1597101 | 0.26673158 | -4.3478546 | 1.3748E-05 | 2.8232E-05 |
| SLC16A12 | ENSG00000152779 | protein_coding | 6731.58147 | -1.1643223 | 0.18989406 | -6.1314307 | 8.7092E-10 | 2.5851E-09 |
| PANK1    | ENSG00000152782 | protein_coding | 1575.09796 | -1.4779606 | 0.13438221 | -10.998186 | 3.899E-28  | 3.526E-27  |
| BMP3     | ENSG00000152785 | protein_coding | 22.8025632 | -1.9561304 | 0.21181679 | -9.2350112 | 2.5826E-20 | 1.5312E-19 |
| GRM1     | ENSG00000152822 | protein_coding | 88.1293725 | -3.36794   | 0.25783746 | -13.06226  | 5.4097E-39 | 8.1042E-38 |
| CNTNAP4  | ENSG00000152910 | protein_coding | 3.36265927 | -2.1496592 | 0.34678539 | -6.1988172 | 5.6889E-10 | 1.7131E-09 |
| LMNTD1   | ENSG00000152936 | protein_coding | 1.43243826 | -1.5622214 | 0.34865381 | -4.4807236 | 7.439E-06  | 1.5678E-05 |
| MARVELD2 | ENSG00000152939 | protein_coding | 949.202164 | -2.3792019 | 0.14260783 | -16.68353  | 1.7271E-62 | 6.3134E-61 |
| LGI2     | ENSG00000153012 | protein_coding | 492.521567 | -3.2773683 | 0.15258513 | -21.478949 | 2.45E-102  | 4.069E-100 |
| BMP6     | ENSG00000153162 | protein_coding | 724.682199 | -2.1244151 | 0.13651641 | -15.56161  | 1.3272E-54 | 3.7302E-53 |
| RGPD3    | ENSG00000153165 | protein_coding | 13.4863681 | -1.5796751 | 0.17643795 | -8.953148  | 3.4549E-19 | 1.9263E-18 |

|          |                 |                |            |            |            |            |            |            |
|----------|-----------------|----------------|------------|------------|------------|------------|------------|------------|
| NR4A2    | ENSG00000153234 | protein_coding | 1429.41615 | -1.1810141 | 0.17520806 | -6.740638  | 1.5769E-11 | 5.3259E-11 |
| PLA2R1   | ENSG00000153246 | protein_coding | 1379.16391 | -3.1192461 | 0.13487104 | -23.12762  | 2.442E-118 | 6.398E-116 |
| SCN3A    | ENSG00000153253 | protein_coding | 99.3540759 | -1.5282992 | 0.27721709 | -5.5130051 | 3.5276E-08 | 9.1464E-08 |
| ADGRF1   | ENSG00000153292 | protein_coding | 1325.03369 | -3.9888372 | 0.37381872 | -10.670512 | 1.3985E-26 | 1.1697E-25 |
| FRMD1    | ENSG00000153303 | protein_coding | 152.162744 | -2.0192309 | 0.27752343 | -7.2758934 | 3.4414E-13 | 1.3058E-12 |
| PLEKHG4B | ENSG00000153404 | protein_coding | 185.772807 | -2.1304491 | 0.2270453  | -9.3833659 | 6.39E-21   | 3.9155E-20 |
| C16orf89 | ENSG00000153446 | protein_coding | 490.968108 | -2.8477377 | 0.26870087 | -10.598171 | 3.0387E-26 | 2.4879E-25 |
| ADPRHL1  | ENSG00000153531 | protein_coding | 50.1246733 | -1.0762876 | 0.13068273 | -8.2358821 | 1.7824E-16 | 8.4078E-16 |
| PTPRD    | ENSG00000153707 | protein_coding | 1748.20006 | -1.1724213 | 0.20125684 | -5.8254978 | 5.6943E-09 | 1.5777E-08 |
| SPHKAP   | ENSG00000153820 | protein_coding | 5.1933654  | -1.8188738 | 0.38808021 | -4.6868501 | 2.7744E-06 | 6.0911E-06 |
| KCNJ16   | ENSG00000153822 | protein_coding | 12771.7879 | -1.5804177 | 0.1301113  | -12.14666  | 5.9757E-34 | 7.1579E-33 |
| MSI2     | ENSG00000153944 | protein_coding | 6006.24654 | -1.02261   | 0.09855558 | -10.375972 | 3.1895E-25 | 2.4739E-24 |
| AK5      | ENSG00000154027 | protein_coding | 72.4824933 | -1.2601535 | 0.17421313 | -7.2334014 | 4.7104E-13 | 1.7711E-12 |
| PRKCA    | ENSG00000154229 | protein_coding | 2721.38628 | -1.2217445 | 0.10358973 | -11.79407  | 4.188E-32  | 4.5918E-31 |
| GAL3ST2  | ENSG00000154252 | protein_coding | 6.64938607 | -1.3105987 | 0.20812234 | -6.2972517 | 3.0297E-10 | 9.3098E-10 |
| UCHL1    | ENSG00000154277 | protein_coding | 1601.2348  | -1.8959188 | 0.24579974 | -7.7132661 | 1.2264E-14 | 5.135E-14  |
| FAM167A  | ENSG00000154319 | protein_coding | 400.113315 | -3.5131304 | 0.19108006 | -18.385646 | 1.7119E-75 | 1.0139E-73 |
| PGM5     | ENSG00000154330 | protein_coding | 1473.62413 | -1.2387498 | 0.12745461 | -9.7191443 | 2.4987E-22 | 1.6522E-21 |
| TMSB4Y   | ENSG00000154620 | protein_coding | 70.6776046 | -1.5952198 | 0.29366037 | -5.432193  | 5.5666E-08 | 1.4224E-07 |
| CHODL    | ENSG00000154645 | protein_coding | 115.455355 | -1.6749903 | 0.23892272 | -7.0105942 | 2.3731E-12 | 8.5001E-12 |
| NCAM2    | ENSG00000154654 | protein_coding | 39.4924507 | -1.3917851 | 0.22990445 | -6.0537547 | 1.4151E-09 | 4.1268E-09 |
| WNT7A    | ENSG00000154764 | protein_coding | 24.30334   | -2.9955273 | 0.27943986 | -10.719757 | 8.2219E-27 | 6.9513E-26 |
| OXNAD1   | ENSG00000154814 | protein_coding | 623.107783 | -1.1143274 | 0.10373533 | -10.742023 | 6.4612E-27 | 5.4931E-26 |
| CA10     | ENSG00000154975 | protein_coding | 144.040088 | -4.8332042 | 0.42311601 | -11.422882 | 3.214E-30  | 3.214E-29  |
| PROM2    | ENSG00000155066 | protein_coding | 1991.7022  | -3.5000359 | 0.28780769 | -12.161023 | 5.0127E-34 | 6.0264E-33 |

|          |                 |                |            |            |            |            |            |            |
|----------|-----------------|----------------|------------|------------|------------|------------|------------|------------|
| PPM1J    | ENSG00000155367 | protein_coding | 59.0442648 | -1.1589918 | 0.12930587 | -8.9631797 | 3.1545E-19 | 1.7615E-18 |
| SLC7A7   | ENSG00000155465 | protein_coding | 5326.49645 | -1.1862743 | 0.18069899 | -6.5649196 | 5.2061E-11 | 1.6929E-10 |
| XAGE2    | ENSG00000155622 | protein_coding | 1.87658748 | -3.1410227 | 0.40334412 | -7.7874513 | 6.8374E-15 | 2.9149E-14 |
| DEPTOR   | ENSG00000155792 | protein_coding | 1999.14561 | -1.5696128 | 0.08678949 | -18.085287 | 4.162E-73  | 2.2499E-71 |
| FMN2     | ENSG00000155816 | protein_coding | 68.4661881 | -3.7632725 | 0.28738555 | -13.094856 | 3.5234E-39 | 5.3323E-38 |
| SLC24A2  | ENSG00000155886 | protein_coding | 41.4650194 | -1.653565  | 0.39377402 | -4.199274  | 2.6777E-05 | 5.3486E-05 |
| RAET1L   | ENSG00000155918 | protein_coding | 5.46174532 | -2.2901599 | 0.26236399 | -8.7289415 | 2.5707E-18 | 1.3608E-17 |
| GRIP1    | ENSG00000155974 | protein_coding | 236.953079 | -1.2964591 | 0.13941512 | -9.2992714 | 1.4141E-20 | 8.5273E-20 |
| KIF5A    | ENSG00000155980 | protein_coding | 51.1649541 | -2.138896  | 0.19518943 | -10.958053 | 6.0793E-28 | 5.443E-27  |
| NAT2     | ENSG00000156006 | protein_coding | 26.8082192 | -1.7130476 | 0.2217295  | -7.7258445 | 1.1111E-14 | 4.6704E-14 |
| WIF1     | ENSG00000156076 | protein_coding | 8.47248418 | -1.9985818 | 0.28209777 | -7.084713  | 1.3933E-12 | 5.0792E-12 |
| ADK      | ENSG00000156110 | protein_coding | 1129.62267 | -1.157158  | 0.0675301  | -17.135439 | 8.0741E-66 | 3.3225E-64 |
| CLDN8    | ENSG00000156284 | protein_coding | 1561.75058 | -3.7208083 | 0.59562808 | -6.2468651 | 4.1877E-10 | 1.2748E-09 |
| ANKRD9   | ENSG00000156381 | protein_coding | 995.338655 | -1.1783628 | 0.12200464 | -9.6583443 | 4.5313E-22 | 2.9611E-21 |
| SFXN2    | ENSG00000156398 | protein_coding | 1273.74676 | -2.3847978 | 0.11036299 | -21.608674 | 1.489E-103 | 2.575E-101 |
| FUT6     | ENSG00000156413 | protein_coding | 1355.50534 | -1.3181618 | 0.21181163 | -6.223274  | 4.8689E-10 | 1.475E-09  |
| TDRD9    | ENSG00000156414 | protein_coding | 232.697316 | -1.1035427 | 0.24037223 | -4.5909744 | 4.4118E-06 | 9.5074E-06 |
| PCDH1    | ENSG00000156453 | protein_coding | 3757.57773 | -1.0050664 | 0.10424533 | -9.6413563 | 5.3477E-22 | 3.4811E-21 |
| PPP2R2B  | ENSG00000156475 | protein_coding | 215.061616 | -2.2931329 | 0.12104166 | -18.944989 | 4.8569E-80 | 3.3992E-78 |
| KCNS2    | ENSG00000156486 | protein_coding | 17.817474  | -1.3586393 | 0.22912503 | -5.9296854 | 3.0352E-09 | 8.613E-09  |
| ZIC3     | ENSG00000156925 | protein_coding | 1.12595917 | -2.231853  | 0.3701604  | -6.0294211 | 1.6455E-09 | 4.7729E-09 |
| SYN2     | ENSG00000157152 | protein_coding | 68.020038  | -2.3214832 | 0.18900034 | -12.282958 | 1.1183E-34 | 1.3874E-33 |
| DHRS4    | ENSG00000157326 | protein_coding | 1057.40159 | -1.0529263 | 0.09806174 | -10.73738  | 6.7945E-27 | 5.7722E-26 |
| CACNA2D3 | ENSG00000157445 | protein_coding | 163.632884 | -2.1037514 | 0.12194663 | -17.25141  | 1.092E-66  | 4.6437E-65 |
| FAM81A   | ENSG00000157470 | protein_coding | 313.399769 | -2.5561359 | 0.12916734 | -19.789336 | 3.6786E-87 | 3.3195E-85 |

|         |                 |                |            |            |            |            |            |            |
|---------|-----------------|----------------|------------|------------|------------|------------|------------|------------|
| KCNJ15  | ENSG00000157551 | protein_coding | 9532.70091 | -1.3760221 | 0.16125987 | -8.5329478 | 1.4267E-17 | 7.2208E-17 |
| TMEM164 | ENSG00000157600 | protein_coding | 1855.25157 | -1.5029859 | 0.06781909 | -22.161694 | 8.047E-109 | 1.662E-106 |
| SVOPL   | ENSG00000157703 | protein_coding | 63.2273723 | -2.0916227 | 0.32505982 | -6.434578  | 1.2382E-10 | 3.9141E-10 |
| DRC1    | ENSG00000157856 | protein_coding | 12.1064217 | -1.1594248 | 0.20912157 | -5.5442621 | 2.952E-08  | 7.7053E-08 |
| PAFAH2  | ENSG00000158006 | protein_coding | 1660.33872 | -1.0625172 | 0.0563099  | -18.869102 | 2.0475E-79 | 1.3884E-77 |
| EXTL1   | ENSG00000158008 | protein_coding | 22.3749776 | -1.3525612 | 0.15770545 | -8.5765029 | 9.7801E-18 | 4.9948E-17 |
| SLC30A2 | ENSG00000158014 | protein_coding | 360.509171 | -3.3956026 | 0.28302289 | -11.997625 | 3.6564E-33 | 4.2209E-32 |
| NLRP14  | ENSG00000158077 | protein_coding | 25.6793264 | -1.0276556 | 0.14543665 | -7.0660017 | 1.5946E-12 | 5.7914E-12 |
| HPD     | ENSG00000158104 | protein_coding | 2366.13541 | -4.8800358 | 0.28164653 | -17.326809 | 2.9526E-67 | 1.2842E-65 |
| LRRC43  | ENSG00000158113 | protein_coding | 90.6236938 | -1.4853824 | 0.18193525 | -8.1643464 | 3.2318E-16 | 1.4996E-15 |
| ESYT3   | ENSG00000158220 | protein_coding | 102.026956 | -1.0248402 | 0.18178425 | -5.6376732 | 1.7236E-08 | 4.5927E-08 |
| TENT5B  | ENSG00000158246 | protein_coding | 216.87624  | -2.5751627 | 0.1804326  | -14.272159 | 3.2632E-46 | 6.6014E-45 |
| CLSTN2  | ENSG00000158258 | protein_coding | 961.034125 | -2.7142844 | 0.20400634 | -13.304902 | 2.1678E-40 | 3.4397E-39 |
| SLC13A3 | ENSG00000158296 | protein_coding | 4136.43168 | -4.7025669 | 0.31407222 | -14.972884 | 1.1043E-50 | 2.6912E-49 |
| TSPAN33 | ENSG00000158457 | protein_coding | 5215.69617 | -1.5640106 | 0.12291645 | -12.724176 | 4.3403E-37 | 6.0237E-36 |
| PFKFB1  | ENSG00000158571 | protein_coding | 17.0487997 | -1.3571473 | 0.11252967 | -12.06035  | 1.7105E-33 | 2.0034E-32 |
| ITLN2   | ENSG00000158764 | protein_coding | 2.77022004 | -2.9177127 | 0.28718963 | -10.159533 | 3.0051E-24 | 2.2045E-23 |
| NPM2    | ENSG00000158806 | protein_coding | 112.670407 | -1.0196466 | 0.17438269 | -5.847178  | 4.9998E-09 | 1.3937E-08 |
| VWA5B1  | ENSG00000158816 | protein_coding | 85.6686445 | -2.0998915 | 0.35358148 | -5.9389182 | 2.8691E-09 | 8.1569E-09 |
| SLC5A11 | ENSG00000158865 | protein_coding | 73.0597085 | -3.0977839 | 0.21287604 | -14.552055 | 5.6675E-48 | 1.2336E-46 |
| WNT9B   | ENSG00000158955 | protein_coding | 95.5260663 | -4.1171559 | 0.19671504 | -20.929543 | 2.8825E-97 | 3.9326E-95 |
| LAD1    | ENSG00000159166 | protein_coding | 1210.39756 | -2.6727136 | 0.22575252 | -11.839131 | 2.4498E-32 | 2.7165E-31 |
| TNNI1   | ENSG00000159173 | protein_coding | 144.184384 | -4.0527498 | 0.24004247 | -16.88347  | 5.954E-64  | 2.2917E-62 |
| GJD2    | ENSG00000159248 | protein_coding | 9.36288284 | -1.963973  | 0.51227    | -3.833863  | 0.00012615 | 0.00023498 |
| CLDN14  | ENSG00000159261 | protein_coding | 137.03435  | -2.950988  | 0.17382032 | -16.977233 | 1.2106E-64 | 4.7965E-63 |



|         |                 |                |            |            |            |            |            |            |
|---------|-----------------|----------------|------------|------------|------------|------------|------------|------------|
| SIM2    | ENSG00000159263 | protein_coding | 371.190018 | -4.5057163 | 0.14657803 | -30.739369 | 1.696E-207 | 5.554E-204 |
| SCUBE1  | ENSG00000159307 | protein_coding | 305.706519 | -1.295436  | 0.18679833 | -6.9349441 | 4.0638E-12 | 1.4313E-11 |
| M1AP    | ENSG00000159374 | protein_coding | 59.7047336 | -1.7403157 | 0.12621021 | -13.789025 | 2.9674E-43 | 5.3179E-42 |
| BTG2    | ENSG00000159388 | protein_coding | 9883.15934 | -2.1160182 | 0.10805135 | -19.583451 | 2.1402E-85 | 1.8068E-83 |
| CELF3   | ENSG00000159409 | protein_coding | 5.2256076  | -1.8468558 | 0.20214431 | -9.1363232 | 6.4612E-20 | 3.7568E-19 |
| ALDH4A1 | ENSG00000159423 | protein_coding | 5053.20536 | -2.0822858 | 0.1652977  | -12.597185 | 2.1881E-36 | 2.939E-35  |
| AMFR    | ENSG00000159461 | protein_coding | 9207.78077 | -1.3978354 | 0.08260443 | -16.922039 | 3.0953E-64 | 1.2076E-62 |
| TGM7    | ENSG00000159495 | protein_coding | 3.24210789 | -1.4686589 | 0.48081388 | -3.0545269 | 0.00225416 | 0.00365431 |
| AGRP    | ENSG00000159723 | protein_coding | 8.87339511 | -1.8466071 | 0.16395978 | -11.262561 | 2.0083E-29 | 1.9415E-28 |
| FNDC5   | ENSG00000160097 | protein_coding | 69.1059655 | -1.2806272 | 0.19486418 | -6.5718966 | 4.9678E-11 | 1.619E-10  |
| CPAMD8  | ENSG00000160111 | protein_coding | 839.944912 | -2.7933157 | 0.13779276 | -20.271862 | 2.2787E-91 | 2.3958E-89 |
| CBS     | ENSG00000160200 | protein_coding | 11.4873711 | -1.1494016 | 0.23577341 | -4.8750264 | 1.0879E-06 | 2.4808E-06 |
| CRYAA   | ENSG00000160202 | protein_coding | 3.52717431 | -4.5851156 | 0.48378914 | -9.4775082 | 2.6043E-21 | 1.6343E-20 |
| PDXK    | ENSG00000160209 | protein_coding | 8095.03607 | -1.0650718 | 0.08610131 | -12.369983 | 3.799E-35  | 4.8055E-34 |
| FTCD    | ENSG00000160282 | protein_coding | 1987.40066 | -1.2752541 | 0.26500584 | -4.8121735 | 1.493E-06  | 3.361E-06  |
| TLCD1   | ENSG00000160606 | protein_coding | 242.123048 | -1.2511093 | 0.14146507 | -8.8439449 | 9.2397E-19 | 5.0273E-18 |
| PTH1R   | ENSG00000160801 | protein_coding | 2598.89384 | -3.265412  | 0.18147289 | -17.993939 | 2.1735E-72 | 1.14E-70   |
| MYL3    | ENSG00000160808 | protein_coding | 355.809424 | -1.2925835 | 0.20460686 | -6.3174008 | 2.66E-10   | 8.2024E-10 |
| AZGP1   | ENSG00000160862 | protein_coding | 2645.31444 | -1.7842572 | 0.2300335  | -7.75651   | 8.7298E-15 | 3.6945E-14 |
| CYP3A4  | ENSG00000160868 | protein_coding | 44.6818469 | -2.0913785 | 0.20657898 | -10.123869 | 4.3296E-24 | 3.1469E-23 |
| CYP3A7  | ENSG00000160870 | protein_coding | 163.802792 | -1.0556246 | 0.18281768 | -5.774193  | 7.7323E-09 | 2.1175E-08 |
| LY6K    | ENSG00000160886 | protein_coding | 45.2673233 | -1.9642155 | 0.21743575 | -9.0335443 | 1.662E-19  | 9.4385E-19 |
| PTGER1  | ENSG00000160951 | protein_coding | 109.29899  | -4.8529773 | 0.30362843 | -15.983277 | 1.6712E-57 | 5.1975E-56 |
| COL26A1 | ENSG00000160963 | protein_coding | 114.210717 | -4.6516148 | 0.28204593 | -16.492402 | 4.1607E-61 | 1.4604E-59 |
| NAPEPLD | ENSG00000161048 | protein_coding | 1840.27879 | -1.1909657 | 0.07257075 | -16.411099 | 1.593E-60  | 5.4946E-59 |

|          |                 |                |            |            |            |            |            |            |
|----------|-----------------|----------------|------------|------------|------------|------------|------------|------------|
| BDH1     | ENSG00000161267 | protein_coding | 703.180082 | -1.798194  | 0.19746002 | -9.1066234 | 8.4986E-20 | 4.9047E-19 |
| NPHS1    | ENSG00000161270 | protein_coding | 604.597184 | -5.9631731 | 0.29984162 | -19.887743 | 5.1962E-88 | 4.8414E-86 |
| FAM171A2 | ENSG00000161682 | protein_coding | 108.415211 | -1.0573692 | 0.14116453 | -7.490332  | 6.87E-14   | 2.7418E-13 |
| AQP5     | ENSG00000161798 | protein_coding | 32.9615997 | -2.5038009 | 0.34565084 | -7.2437288 | 4.3651E-13 | 1.6438E-12 |
| PRR35    | ENSG00000161992 | protein_coding | 92.7091266 | -6.9489294 | 0.43648628 | -15.920155 | 4.5923E-57 | 1.4016E-55 |
| SSTR5    | ENSG00000162009 | protein_coding | 22.7073939 | -3.7652308 | 0.31068664 | -12.119062 | 8.3711E-34 | 9.9673E-33 |
| HS3ST6   | ENSG00000162040 | protein_coding | 5.817144   | -3.9751246 | 0.37801191 | -10.515871 | 7.3003E-26 | 5.8649E-25 |
| TBC1D24  | ENSG00000162065 | protein_coding | 1217.63208 | -1.3583696 | 0.09657085 | -14.066042 | 6.1412E-45 | 1.1754E-43 |
| CYP4A22  | ENSG00000162365 | protein_coding | 707.775482 | -1.8774298 | 0.31059233 | -6.0446755 | 1.4971E-09 | 4.3563E-09 |
| ACOT11   | ENSG00000162390 | protein_coding | 802.307167 | -1.9838528 | 0.13871977 | -14.301154 | 2.1521E-46 | 4.3905E-45 |
| FAM151A  | ENSG00000162391 | protein_coding | 1250.50969 | -3.9802774 | 0.24971375 | -15.93936  | 3.3779E-57 | 1.0399E-55 |
| BSND     | ENSG00000162399 | protein_coding | 644.556382 | -3.2767894 | 0.58273198 | -5.6231501 | 1.8751E-08 | 4.9809E-08 |
| KLHL21   | ENSG00000162413 | protein_coding | 3293.34273 | -1.1740989 | 0.09000566 | -13.044723 | 6.8104E-39 | 1.0136E-37 |
| TMEM82   | ENSG00000162460 | protein_coding | 305.668238 | -1.1807169 | 0.25118436 | -4.7005988 | 2.594E-06  | 5.7084E-06 |
| AKR7A3   | ENSG00000162482 | protein_coding | 1232.03599 | -1.5520439 | 0.1805061  | -8.5982905 | 8.0912E-18 | 4.1531E-17 |
| LRRC38   | ENSG00000162494 | protein_coding | 2.58289931 | -1.5774028 | 0.37079396 | -4.2541222 | 2.0987E-05 | 4.2352E-05 |
| KIAA1522 | ENSG00000162522 | protein_coding | 4268.83733 | -1.4075188 | 0.08485268 | -16.587794 | 8.54E-62   | 3.0513E-60 |
| WNT4     | ENSG00000162552 | protein_coding | 74.3344512 | -1.8459908 | 0.22042706 | -8.3746108 | 5.5407E-17 | 2.702E-16  |
| DIRAS3   | ENSG00000162595 | protein_coding | 185.901628 | -1.837642  | 0.17246284 | -10.655293 | 1.6473E-26 | 1.3717E-25 |
| C1orf87  | ENSG00000162598 | protein_coding | 5.68107586 | -2.7702823 | 0.33239561 | -8.3342928 | 7.7963E-17 | 3.7671E-16 |
| LRRIQ3   | ENSG00000162620 | protein_coding | 81.2629499 | -1.2968791 | 0.11852676 | -10.941657 | 7.2856E-28 | 6.5002E-27 |
| B3GALT2  | ENSG00000162630 | protein_coding | 54.6013687 | -1.6128095 | 0.16320881 | -9.8818774 | 4.9889E-23 | 3.4231E-22 |
| NTNG1    | ENSG00000162631 | protein_coding | 168.59463  | -4.4796892 | 0.31469405 | -14.235061 | 5.5514E-46 | 1.1113E-44 |
| WDR63    | ENSG00000162643 | protein_coding | 45.1536544 | -1.3507157 | 0.14717962 | -9.1773283 | 4.4192E-20 | 2.5892E-19 |
| BRINP3   | ENSG00000162670 | protein_coding | 31.9584671 | -4.3210571 | 0.4639993  | -9.312637  | 1.247E-20  | 7.5372E-20 |

|          |                 |                |            |            |            |            |            |            |
|----------|-----------------|----------------|------------|------------|------------|------------|------------|------------|
| KCNJ9    | ENSG00000162728 | protein_coding | 10.0800553 | -1.7443443 | 0.15197081 | -11.478153 | 1.6987E-30 | 1.7239E-29 |
| LRRC52   | ENSG00000162763 | protein_coding | 11.5060758 | -2.6613226 | 0.60773284 | -4.3790995 | 1.1917E-05 | 2.4618E-05 |
| ATF3     | ENSG00000162772 | protein_coding | 5478.23204 | -1.2223501 | 0.1790958  | -6.825119  | 8.7852E-12 | 3.023E-11  |
| AXDND1   | ENSG00000162779 | protein_coding | 21.5912173 | -2.1164582 | 0.16799843 | -12.598083 | 2.1634E-36 | 2.9066E-35 |
| TDRD5    | ENSG00000162782 | protein_coding | 40.7252041 | -2.8214447 | 0.28556405 | -9.8802517 | 5.0705E-23 | 3.477E-22  |
| SPATA17  | ENSG00000162814 | protein_coding | 154.9337   | -1.1767879 | 0.10904627 | -10.791638 | 3.7701E-27 | 3.2455E-26 |
| KIF26B   | ENSG00000162849 | protein_coding | 553.35166  | -1.2789424 | 0.16178285 | -7.9053028 | 2.6728E-15 | 1.171E-14  |
| PM20D1   | ENSG00000162877 | protein_coding | 76.5586371 | -2.871965  | 0.21092165 | -13.616265 | 3.2055E-42 | 5.4829E-41 |
| IL20     | ENSG00000162891 | protein_coding | 2.24494594 | -1.3258139 | 0.35657829 | -3.7181566 | 0.00020068 | 0.00036583 |
| PIGR     | ENSG00000162896 | protein_coding | 13977.2097 | -1.4703636 | 0.30303137 | -4.8521828 | 1.2211E-06 | 2.7711E-06 |
| FCAMR    | ENSG00000162897 | protein_coding | 908.576717 | -1.5483672 | 0.2507435  | -6.1751038 | 6.612E-10  | 1.9808E-09 |
| LRRTM1   | ENSG00000162951 | protein_coding | 9.09650294 | -1.2265726 | 0.47341222 | -2.5909188 | 0.00957201 | 0.01436537 |
| NEUROD1  | ENSG00000162992 | protein_coding | 1.97701383 | -1.2101683 | 0.37556793 | -3.2222353 | 0.00127195 | 0.00212252 |
| VSNL1    | ENSG00000163032 | protein_coding | 43.9693342 | -1.8382607 | 0.30602857 | -6.0068271 | 1.8919E-09 | 5.4641E-09 |
| CFAP221  | ENSG00000163075 | protein_coding | 605.60936  | -1.4084008 | 0.12521193 | -11.248136 | 2.3654E-29 | 2.2799E-28 |
| STPG2    | ENSG00000163116 | protein_coding | 35.5451596 | -1.0962434 | 0.14762158 | -7.4260371 | 1.119E-13  | 4.4008E-13 |
| NEURL3   | ENSG00000163121 | protein_coding | 231.786978 | -1.0084356 | 0.14427827 | -6.9895181 | 2.7583E-12 | 9.8339E-12 |
| BNIP1    | ENSG00000163141 | protein_coding | 58.0992103 | -1.6032221 | 0.15419672 | -10.397252 | 2.5519E-25 | 1.9905E-24 |
| C1QTNF7  | ENSG00000163145 | protein_coding | 247.951292 | -1.6170768 | 0.17037891 | -9.491062  | 2.2869E-21 | 1.44E-20   |
| SPRR2D   | ENSG00000163216 | protein_coding | 1.39018473 | -1.5910737 | 0.5680278  | -2.801049  | 0.00509368 | 0.00791926 |
| GABRB1   | ENSG00000163288 | protein_coding | 17.5511907 | -1.1850837 | 0.25623753 | -4.6249419 | 3.747E-06  | 8.1249E-06 |
| NIPAL1   | ENSG00000163293 | protein_coding | 346.721476 | -3.2091586 | 0.18100409 | -17.729757 | 2.471E-70  | 1.2025E-68 |
| GPR155   | ENSG00000163328 | protein_coding | 1539.36929 | -1.1287163 | 0.12188462 | -9.2605314 | 2.0342E-20 | 1.2135E-19 |
| TAF4     | ENSG00000163377 | protein_coding | 4.11538556 | -4.4622009 | 0.25330404 | -17.615988 | 1.8572E-69 | 8.7588E-68 |
| SLC22A15 | ENSG00000163393 | protein_coding | 325.205217 | -1.3007025 | 0.14333153 | -9.0747827 | 1.139E-19  | 6.5244E-19 |

|          |                 |                |            |            |            |            |            |            |
|----------|-----------------|----------------|------------|------------|------------|------------|------------|------------|
| ATP1A1   | ENSG00000163399 | protein_coding | 71053.5275 | -2.7720038 | 0.09701323 | -28.573463 | 1.436E-179 | 2.194E-176 |
| SLC15A2  | ENSG00000163406 | protein_coding | 493.506827 | -3.073409  | 0.16160023 | -19.018594 | 1.1965E-80 | 8.5302E-79 |
| TEX55    | ENSG00000163424 | protein_coding | 4.15494286 | -1.1441168 | 0.50368992 | -2.2714705 | 0.02311851 | 0.03286424 |
| ELF3     | ENSG00000163435 | protein_coding | 4688.66776 | -1.1127462 | 0.14048831 | -7.9205608 | 2.3644E-15 | 1.0398E-14 |
| ADORA1   | ENSG00000163485 | protein_coding | 448.379758 | -1.1334803 | 0.19773531 | -5.7323112 | 9.9071E-09 | 2.69E-08   |
| HDAC11   | ENSG00000163517 | protein_coding | 1512.87168 | -1.0455042 | 0.09430838 | -11.086016 | 1.4668E-28 | 1.3526E-27 |
| DPPA2    | ENSG00000163530 | protein_coding | 3.60325025 | -1.880201  | 0.399999   | -4.7005142 | 2.5951E-06 | 5.7105E-06 |
| NFASC    | ENSG00000163531 | protein_coding | 2835.38279 | -1.7245553 | 0.14678331 | -11.748988 | 7.147E-32  | 7.7416E-31 |
| SUCLG1   | ENSG00000163541 | protein_coding | 6295.90756 | -1.7617537 | 0.08972737 | -19.634519 | 7.842E-86  | 6.7572E-84 |
| NUAK2    | ENSG00000163545 | protein_coding | 1843.58568 | -2.1239765 | 0.12925612 | -16.432309 | 1.123E-60  | 3.8941E-59 |
| FABP1    | ENSG00000163586 | protein_coding | 651.608048 | -4.4161359 | 0.3339867  | -13.22249  | 6.5073E-40 | 1.0088E-38 |
| CDS1     | ENSG00000163624 | protein_coding | 1748.14058 | -1.3916233 | 0.12288061 | -11.325003 | 9.8675E-30 | 9.6591E-29 |
| PTPN13   | ENSG00000163629 | protein_coding | 3353.43775 | -1.8551012 | 0.091185   | -20.344367 | 5.208E-92  | 5.6842E-90 |
| SYNPR    | ENSG00000163630 | protein_coding | 1.24697421 | -3.2015614 | 0.4361717  | -7.3401403 | 2.1337E-13 | 8.2173E-13 |
| ALB      | ENSG00000163631 | protein_coding | 1687.51982 | -5.0971487 | 0.27346789 | -18.63893  | 1.5532E-77 | 9.9579E-76 |
| PPM1K    | ENSG00000163644 | protein_coding | 1538.65053 | -1.5333259 | 0.08660688 | -17.704436 | 3.8754E-70 | 1.878E-68  |
| PTX3     | ENSG00000163661 | protein_coding | 125.359395 | -1.0001406 | 0.20301715 | -4.9263849 | 8.3765E-07 | 1.9317E-06 |
| DNASE1L3 | ENSG00000163687 | protein_coding | 595.688725 | -2.1852365 | 0.1641314  | -13.313945 | 1.9207E-40 | 3.0539E-39 |
| RBM47    | ENSG00000163694 | protein_coding | 8602.71281 | -1.0950282 | 0.08368031 | -13.085853 | 3.9668E-39 | 5.9915E-38 |
| IL17RE   | ENSG00000163701 | protein_coding | 309.827365 | -1.4439351 | 0.13448483 | -10.736788 | 6.8382E-27 | 5.8061E-26 |
| PRRT3    | ENSG00000163704 | protein_coding | 150.191869 | -1.2650644 | 0.10122557 | -12.497479 | 7.7056E-36 | 1.0084E-34 |
| LRRC2    | ENSG00000163827 | protein_coding | 233.021741 | -3.424578  | 0.23075346 | -14.840852 | 7.9736E-50 | 1.8725E-48 |
| LIPH     | ENSG00000163898 | protein_coding | 443.655802 | -3.5719978 | 0.2538625  | -14.0706   | 5.7578E-45 | 1.1039E-43 |
| ARHGEF3  | ENSG00000163947 | protein_coding | 2300.55239 | -1.0861035 | 0.0689476  | -15.752594 | 6.5921E-56 | 1.9309E-54 |
| MELTF    | ENSG00000163975 | protein_coding | 925.409047 | -2.4944337 | 0.24373119 | -10.234364 | 1.3911E-24 | 1.0408E-23 |

|         |                 |                |            |            |            |            |            |            |
|---------|-----------------|----------------|------------|------------|------------|------------|------------|------------|
| CLDN19  | ENSG00000164007 | protein_coding | 885.389427 | -5.6948846 | 0.27806761 | -20.480215 | 3.2323E-93 | 3.7323E-91 |
| EMCN    | ENSG00000164035 | protein_coding | 4937.13342 | -1.1210508 | 0.13851391 | -8.0934163 | 5.8014E-16 | 2.6499E-15 |
| PLXNB1  | ENSG00000164050 | protein_coding | 4850.20943 | -1.4254212 | 0.08879542 | -16.052868 | 5.4582E-58 | 1.7328E-56 |
| APEH    | ENSG00000164062 | protein_coding | 4584.38068 | -1.225512  | 0.08556487 | -14.322608 | 1.5808E-46 | 3.2423E-45 |
| ETNPPL  | ENSG00000164089 | protein_coding | 63.7176154 | -2.4462788 | 0.33842811 | -7.2283559 | 4.8888E-13 | 1.8359E-12 |
| NDST3   | ENSG00000164100 | protein_coding | 25.4765934 | -3.0645254 | 0.21427814 | -14.301624 | 2.1376E-46 | 4.3648E-45 |
| MAP9    | ENSG00000164114 | protein_coding | 1021.21017 | -1.2785772 | 0.1228662  | -10.406257 | 2.3217E-25 | 1.8147E-24 |
| HPGD    | ENSG00000164120 | protein_coding | 1291.94672 | -1.9060381 | 0.22619852 | -8.4263949 | 3.5648E-17 | 1.7598E-16 |
| NPY1R   | ENSG00000164128 | protein_coding | 1821.0973  | -1.1962495 | 0.14223179 | -8.4105636 | 4.0805E-17 | 2.0064E-16 |
| NPY5R   | ENSG00000164129 | protein_coding | 79.7464763 | -2.4265756 | 0.17228873 | -14.084354 | 4.7397E-45 | 9.1176E-44 |
| RANBP3L | ENSG00000164188 | protein_coding | 522.438003 | -5.2040735 | 0.23965821 | -21.714564 | 1.495E-104 | 2.697E-102 |
| ADGRV1  | ENSG00000164199 | protein_coding | 284.816832 | -2.7343284 | 0.17539543 | -15.589507 | 8.5793E-55 | 2.4247E-53 |
| CDC20B  | ENSG00000164287 | protein_coding | 36.0034853 | -1.2393818 | 0.2436282  | -5.0871854 | 3.6342E-07 | 8.6605E-07 |
| RHOBTB3 | ENSG00000164292 | protein_coding | 3067.29855 | -1.5621102 | 0.15268393 | -10.231006 | 1.4402E-24 | 1.0764E-23 |
| ENPP6   | ENSG00000164303 | protein_coding | 283.319145 | -5.0634414 | 0.19643986 | -25.776039 | 1.646E-146 | 1.048E-143 |
| TMEM174 | ENSG00000164325 | protein_coding | 1384.94981 | -2.2761793 | 0.28465082 | -7.9963911 | 1.2812E-15 | 5.736E-15  |
| FOXQ1   | ENSG00000164379 | protein_coding | 460.399827 | -1.2115878 | 0.15662563 | -7.7355649 | 1.0295E-14 | 4.337E-14  |
| ACSL6   | ENSG00000164398 | protein_coding | 214.633541 | -2.1592247 | 0.1776368  | -12.155278 | 5.3779E-34 | 6.4586E-33 |
| GRIK2   | ENSG00000164418 | protein_coding | 37.8996888 | -2.8177453 | 0.18614091 | -15.1377   | 9.1353E-52 | 2.3213E-50 |
| CALHM4  | ENSG00000164451 | protein_coding | 4.49641562 | -1.2631491 | 0.19322686 | -6.5371301 | 6.271E-11  | 2.0273E-10 |
| DACT2   | ENSG00000164488 | protein_coding | 169.199377 | -1.3078286 | 0.28780255 | -4.5441868 | 5.5148E-06 | 1.1768E-05 |
| RAET1E  | ENSG00000164520 | protein_coding | 57.2820181 | -1.8953085 | 0.11754324 | -16.124351 | 1.7206E-58 | 5.5427E-57 |
| PI16    | ENSG00000164530 | protein_coding | 108.586625 | -2.2914672 | 0.29842078 | -7.6786451 | 1.6078E-14 | 6.6784E-14 |
| KIF6    | ENSG00000164627 | protein_coding | 89.2950272 | -1.5428719 | 0.12958997 | -11.905798 | 1.104E-32  | 1.2416E-31 |
| SLC30A8 | ENSG00000164756 | protein_coding | 57.4044738 | -3.3382376 | 0.31392963 | -10.633713 | 2.0768E-26 | 1.7187E-25 |

|           |                 |                |            |            |            |            |            |            |
|-----------|-----------------|----------------|------------|------------|------------|------------|------------|------------|
| TNFRSF11B | ENSG00000164761 | protein_coding | 2549.74077 | -1.1449585 | 0.14997277 | -7.6344428 | 2.268E-14  | 9.3269E-14 |
| DEFB1     | ENSG00000164825 | protein_coding | 9328.19491 | -1.7000491 | 0.26336417 | -6.4551268 | 1.0813E-10 | 3.4331E-10 |
| UNCX      | ENSG00000164853 | protein_coding | 10.7647437 | -7.3183028 | 0.32967123 | -22.198791 | 3.528E-109 | 7.318E-107 |
| SLC7A13   | ENSG00000164893 | protein_coding | 155.751759 | -5.0054533 | 0.46390766 | -10.789762 | 3.8478E-27 | 3.31E-26   |
| FREM1     | ENSG00000164946 | protein_coding | 616.926906 | -3.3165178 | 0.24664991 | -13.446256 | 3.2386E-41 | 5.3097E-40 |
| C9orf24   | ENSG00000164972 | protein_coding | 60.4297839 | -1.0338506 | 0.19112829 | -5.4091973 | 6.3308E-08 | 1.6101E-07 |
| MYORG     | ENSG00000164976 | protein_coding | 1463.79219 | -1.5357356 | 0.10197132 | -15.060466 | 2.947E-51  | 7.3262E-50 |
| MAMDC2    | ENSG00000165072 | protein_coding | 204.152426 | -1.9785964 | 0.16460212 | -12.02048  | 2.7736E-33 | 3.2196E-32 |
| TMC1      | ENSG00000165091 | protein_coding | 26.960656  | -2.1333083 | 0.15170646 | -14.06208  | 6.4949E-45 | 1.2426E-43 |
| SVEP1     | ENSG00000165124 | protein_coding | 1244.66375 | -1.5752199 | 0.17244833 | -9.1344454 | 6.5743E-20 | 3.8216E-19 |
| TRPV6     | ENSG00000165125 | protein_coding | 133.368423 | -4.8469477 | 0.20568434 | -23.564982 | 8.815E-123 | 2.676E-120 |
| LLCFC1    | ENSG00000165131 | protein_coding | 1.69675579 | -1.0319865 | 0.1906379  | -5.4133333 | 6.1862E-08 | 1.5746E-07 |
| FBP1      | ENSG00000165140 | protein_coding | 3649.18269 | -2.361061  | 0.15494231 | -15.238323 | 1.9686E-52 | 5.1332E-51 |
| SHOC1     | ENSG00000165181 | protein_coding | 111.217537 | -1.0710773 | 0.27282213 | -3.9259179 | 8.64E-05   | 0.00016374 |
| CXorf58   | ENSG00000165182 | protein_coding | 5.84182239 | -1.9042431 | 0.11440311 | -16.64503  | 3.288E-62  | 1.1943E-60 |
| PTCHD1    | ENSG00000165186 | protein_coding | 26.1243571 | -1.1915686 | 0.28771305 | -4.1415175 | 3.4502E-05 | 6.8195E-05 |
| VEGFD     | ENSG00000165197 | protein_coding | 61.4935513 | -1.0210442 | 0.18371404 | -5.5577905 | 2.7321E-08 | 7.1522E-08 |
| AQP7      | ENSG00000165269 | protein_coding | 734.81892  | -1.0621512 | 0.17073061 | -6.2212109 | 4.9333E-10 | 1.4937E-09 |
| AQP3      | ENSG00000165272 | protein_coding | 9395.65241 | -2.2091725 | 0.14339627 | -15.406067 | 1.4901E-53 | 4.0419E-52 |
| SLC7A3    | ENSG00000165349 | protein_coding | 2.9912876  | -2.463206  | 0.34195656 | -7.2032718 | 5.8785E-13 | 2.1957E-12 |
| SLC16A9   | ENSG00000165449 | protein_coding | 5817.97669 | -1.0990075 | 0.20997939 | -5.2338827 | 1.6599E-07 | 4.0727E-07 |
| CRYL1     | ENSG00000165475 | protein_coding | 9455.54073 | -1.084869  | 0.10443476 | -10.388007 | 2.8117E-25 | 2.1872E-24 |
| HEPACAM   | ENSG00000165478 | protein_coding | 5.28347647 | -1.1538846 | 0.25392558 | -4.5441842 | 5.5148E-06 | 1.1768E-05 |
| PKNOX2    | ENSG00000165495 | protein_coding | 123.327261 | -1.580086  | 0.16312272 | -9.6864863 | 3.4417E-22 | 2.2609E-21 |
| EML5      | ENSG00000165521 | protein_coding | 45.9066975 | -1.351056  | 0.17521877 | -7.7106808 | 1.2515E-14 | 5.2373E-14 |



|          |                 |                |            |            |            |            |            |            |
|----------|-----------------|----------------|------------|------------|------------|------------|------------|------------|
| AMER2    | ENSG00000165566 | protein_coding | 5.27884394 | -2.4760934 | 0.32279542 | -7.6707822 | 1.7095E-14 | 7.0881E-14 |
| OXGR1    | ENSG00000165621 | protein_coding | 110.80715  | -2.5983449 | 0.34028776 | -7.6357282 | 2.2455E-14 | 9.2401E-14 |
| ZNF503   | ENSG00000165655 | protein_coding | 1280.85352 | -1.9294889 | 0.09895972 | -19.497719 | 1.1479E-84 | 9.4641E-83 |
| TMEM52B  | ENSG00000165685 | protein_coding | 1984.80823 | -5.0317032 | 0.26612273 | -18.907454 | 9.9024E-80 | 6.8674E-78 |
| FRMD7    | ENSG00000165694 | protein_coding | 51.4523885 | -3.656101  | 0.48951133 | -7.4688792 | 8.0881E-14 | 3.2109E-13 |
| SPACA9   | ENSG00000165698 | protein_coding | 497.177679 | -1.1442736 | 0.07939658 | -14.412127 | 4.3413E-47 | 9.108E-46  |
| STOX1    | ENSG00000165730 | protein_coding | 151.32675  | -1.705222  | 0.18410407 | -9.2622718 | 2.0013E-20 | 1.1945E-19 |
| NDRG2    | ENSG00000165795 | protein_coding | 6957.72955 | -1.323083  | 0.11211784 | -11.800825 | 3.8651E-32 | 4.2428E-31 |
| PPP1R36  | ENSG00000165807 | protein_coding | 73.3241899 | -2.411102  | 0.20272679 | -11.893357 | 1.2815E-32 | 1.4379E-31 |
| CCDC186  | ENSG00000165813 | protein_coding | 1855.19932 | -1.2950968 | 0.07449916 | -17.384045 | 1.0899E-67 | 4.7901E-66 |
| VWA2     | ENSG00000165816 | protein_coding | 49.3101469 | -2.9085363 | 0.21819908 | -13.329737 | 1.5544E-40 | 2.482E-39  |
| PRAP1    | ENSG00000165828 | protein_coding | 1901.33037 | -1.1877564 | 0.26043377 | -4.5606853 | 5.0987E-06 | 1.0914E-05 |
| C10orf82 | ENSG00000165863 | protein_coding | 19.9535937 | -2.7993428 | 0.22519939 | -12.430508 | 1.785E-35  | 2.303E-34  |
| ANKRD2   | ENSG00000165887 | protein_coding | 186.898741 | -3.2128354 | 0.27570286 | -11.653254 | 2.2086E-31 | 2.3415E-30 |
| OTOGL    | ENSG00000165899 | protein_coding | 181.99538  | -2.5153414 | 0.18004608 | -13.970543 | 2.3582E-44 | 4.4196E-43 |
| LARGE2   | ENSG00000165905 | protein_coding | 697.892597 | -1.4110855 | 0.17379823 | -8.119102  | 4.6965E-16 | 2.1583E-15 |
| CLMN     | ENSG00000165959 | protein_coding | 4029.63539 | -1.3939122 | 0.10203291 | -13.661399 | 1.7264E-42 | 2.9931E-41 |
| PDZRN4   | ENSG00000165966 | protein_coding | 74.9001625 | -1.330136  | 0.25975589 | -5.1207156 | 3.0438E-07 | 7.3014E-07 |
| NELL1    | ENSG00000165973 | protein_coding | 364.974666 | -5.7951581 | 0.41126932 | -14.090908 | 4.3197E-45 | 8.3272E-44 |
| HACD1    | ENSG00000165996 | protein_coding | 119.370041 | -1.0724625 | 0.15578665 | -6.884175  | 5.8123E-12 | 2.0248E-11 |
| ABTB2    | ENSG00000166016 | protein_coding | 1085.83984 | -1.6147679 | 0.14538436 | -11.106889 | 1.1614E-28 | 1.0778E-27 |
| ADAMTS15 | ENSG00000166106 | protein_coding | 696.727417 | -1.9579693 | 0.15150206 | -12.923714 | 3.3078E-38 | 4.797E-37  |
| GPT2     | ENSG00000166123 | protein_coding | 1503.49699 | -1.1225155 | 0.13995633 | -8.0204697 | 1.0534E-15 | 4.7375E-15 |
| MOGAT2   | ENSG00000166391 | protein_coding | 23.7117366 | -4.2618781 | 0.32095332 | -13.27881  | 3.0724E-40 | 4.8399E-39 |
| SERPINB7 | ENSG00000166396 | protein_coding | 15.0852999 | -1.3419094 | 0.287235   | -4.6718171 | 2.9855E-06 | 6.5357E-06 |

|          |                 |                |            |            |            |            |            |            |
|----------|-----------------|----------------|------------|------------|------------|------------|------------|------------|
| RIC3     | ENSG00000166405 | protein_coding | 296.673807 | -1.069484  | 0.24658205 | -4.3372338 | 1.4429E-05 | 2.9581E-05 |
| WDR72    | ENSG00000166415 | protein_coding | 4774.11235 | -1.8892481 | 0.16813736 | -11.236337 | 2.7037E-29 | 2.6016E-28 |
| CRABP1   | ENSG00000166426 | protein_coding | 80.2790031 | -2.0255646 | 0.50482534 | -4.0124067 | 6.0103E-05 | 0.00011572 |
| PRTG     | ENSG00000166450 | protein_coding | 168.843544 | -2.0014313 | 0.16055054 | -12.466051 | 1.1435E-35 | 1.4867E-34 |
| CLEC3A   | ENSG00000166509 | protein_coding | 3.72057711 | -2.4811368 | 0.37653812 | -6.5893377 | 4.4179E-11 | 1.4451E-10 |
| CDH16    | ENSG00000166589 | protein_coding | 21125.2389 | -2.3690328 | 0.14371922 | -16.483757 | 4.8006E-61 | 1.6825E-59 |
| BMERB1   | ENSG00000166780 | protein_coding | 883.593395 | -1.0709582 | 0.08754216 | -12.233627 | 2.0555E-34 | 2.5107E-33 |
| LDHC     | ENSG00000166796 | protein_coding | 31.3921776 | -1.4814675 | 0.250078   | -5.9240218 | 3.1416E-09 | 8.9035E-09 |
| LDHD     | ENSG00000166816 | protein_coding | 1187.6047  | -2.268937  | 0.18202658 | -12.464866 | 1.1607E-35 | 1.5081E-34 |
| SCNN1G   | ENSG00000166828 | protein_coding | 1930.31872 | -4.7349233 | 0.38794729 | -12.205068 | 2.9206E-34 | 3.5466E-33 |
| NAV2     | ENSG00000166833 | protein_coding | 2123.72068 | -1.6208687 | 0.08827002 | -18.36262  | 2.6167E-75 | 1.5418E-73 |
| GLYATL1  | ENSG00000166840 | protein_coding | 4232.4788  | -1.4515498 | 0.19428965 | -7.4710608 | 7.9551E-14 | 3.1598E-13 |
| GPR182   | ENSG00000166856 | protein_coding | 45.9720754 | -2.4393996 | 0.16910135 | -14.425666 | 3.5681E-47 | 7.5134E-46 |
| CHP2     | ENSG00000166869 | protein_coding | 19.505395  | -5.3097327 | 0.2709754  | -19.594888 | 1.7096E-85 | 1.4513E-83 |
| PIP4K2C  | ENSG00000166908 | protein_coding | 2834.18321 | -1.4163859 | 0.06483616 | -21.845617 | 8.556E-106 | 1.594E-103 |
| MTMR10   | ENSG00000166912 | protein_coding | 3928.40514 | -1.1584126 | 0.06468241 | -17.909236 | 9.9897E-72 | 5.1166E-70 |
| GREM1    | ENSG00000166923 | protein_coding | 464.831544 | -2.423351  | 0.28952345 | -8.3701369 | 5.7551E-17 | 2.8033E-16 |
| NYAP1    | ENSG00000166924 | protein_coding | 30.9988735 | -2.614785  | 0.15250293 | -17.145803 | 6.756E-66  | 2.7901E-64 |
| CCDC178  | ENSG00000166960 | protein_coding | 129.529909 | -1.4906594 | 0.15223001 | -9.7921519 | 1.2168E-22 | 8.1931E-22 |
| TCP10L2  | ENSG00000166984 | protein_coding | 3.47279414 | -1.6517034 | 0.26362411 | -6.2653729 | 3.7193E-10 | 1.1358E-09 |
| B4GALNT2 | ENSG00000167080 | protein_coding | 573.825061 | -3.6076997 | 0.29162751 | -12.370917 | 3.7551E-35 | 4.7512E-34 |
| FAM102A  | ENSG00000167106 | protein_coding | 3971.86286 | -1.0673279 | 0.13076913 | -8.1619257 | 3.2973E-16 | 1.5289E-15 |
| ACSF2    | ENSG00000167107 | protein_coding | 1908.02673 | -3.2985896 | 0.14067447 | -23.448388 | 1.373E-121 | 4.034E-119 |
| SLC27A4  | ENSG00000167114 | protein_coding | 1594.16377 | -1.004449  | 0.08970109 | -11.197735 | 4.1829E-29 | 3.979E-28  |
| PRR15L   | ENSG00000167183 | protein_coding | 617.783871 | -2.0888963 | 0.2780531  | -7.5125806 | 5.7973E-14 | 2.3236E-13 |

|         |                 |                |            |            |            |            |            |            |
|---------|-----------------|----------------|------------|------------|------------|------------|------------|------------|
| GPRC5B  | ENSG00000167191 | protein_coding | 4634.22258 | -1.2095462 | 0.10622104 | -11.387068 | 4.8504E-30 | 4.8085E-29 |
| RBFOX3  | ENSG00000167281 | protein_coding | 13.7273266 | -1.1981083 | 0.21630429 | -5.5389947 | 3.0421E-08 | 7.933E-08  |
| CA4     | ENSG00000167434 | protein_coding | 666.552977 | -1.4900749 | 0.21714031 | -6.8622674 | 6.7776E-12 | 2.3509E-11 |
| AQP2    | ENSG00000167580 | protein_coding | 23239.9844 | -8.9127805 | 0.49104155 | -18.150767 | 1.2662E-73 | 6.9849E-72 |
| GPD1    | ENSG00000167588 | protein_coding | 4154.34525 | -1.6825087 | 0.21358049 | -7.8776328 | 3.3364E-15 | 1.4511E-14 |
| CYP2S1  | ENSG00000167600 | protein_coding | 218.665599 | -1.0532191 | 0.13936042 | -7.5575198 | 4.1083E-14 | 1.6616E-13 |
| TMC4    | ENSG00000167608 | protein_coding | 1562.6543  | -2.0689725 | 0.20318288 | -10.182809 | 2.3663E-24 | 1.7487E-23 |
| PSCA    | ENSG00000167653 | protein_coding | 60.3515374 | -2.955279  | 0.31159487 | -9.4843636 | 2.4387E-21 | 1.5326E-20 |
| MFSD3   | ENSG00000167700 | protein_coding | 702.93198  | -1.0620844 | 0.12168229 | -8.7283405 | 2.5844E-18 | 1.3677E-17 |
| SLC43A2 | ENSG00000167703 | protein_coding | 6203.70456 | -1.0842496 | 0.09899126 | -10.952983 | 6.4295E-28 | 5.7498E-27 |
| GGT6    | ENSG00000167741 | protein_coding | 827.611618 | -4.7096393 | 0.32947771 | -14.294258 | 2.3762E-46 | 4.8349E-45 |
| KLK1    | ENSG00000167748 | protein_coding | 1077.96216 | -1.2758971 | 0.47121988 | -2.7076469 | 0.00677621 | 0.0103823  |
| KLK5    | ENSG00000167754 | protein_coding | 10.8611448 | -3.536942  | 0.41795464 | -8.4625021 | 2.617E-17  | 1.3034E-16 |
| KLK6    | ENSG00000167755 | protein_coding | 114.478811 | -5.4261187 | 0.418582   | -12.963096 | 1.9809E-38 | 2.8919E-37 |
| KLK11   | ENSG00000167757 | protein_coding | 6.66558452 | -1.3706133 | 0.43409746 | -3.1573862 | 0.0015919  | 0.00262668 |
| EVPL    | ENSG00000167880 | protein_coding | 1125.67704 | -1.5563114 | 0.11539728 | -13.486552 | 1.8767E-41 | 3.1171E-40 |
| KRT24   | ENSG00000167916 | protein_coding | 2.53320958 | -2.2403038 | 0.30941844 | -7.2403693 | 4.4746E-13 | 1.6844E-12 |
| SOST    | ENSG00000167941 | protein_coding | 146.232612 | -6.8430868 | 0.33541293 | -20.401977 | 1.6059E-92 | 1.8088E-90 |
| ENTPD3  | ENSG00000168032 | protein_coding | 43.1819469 | -3.2400043 | 0.20697725 | -15.653915 | 3.1239E-55 | 8.9503E-54 |
| SCARA3  | ENSG00000168077 | protein_coding | 1625.1653  | -1.1820853 | 0.18424571 | -6.4158091 | 1.4008E-10 | 4.4093E-10 |
| SCARA5  | ENSG00000168079 | protein_coding | 79.7544649 | -1.9289158 | 0.29715678 | -6.4912396 | 8.5133E-11 | 2.7258E-10 |
| FAM83B  | ENSG00000168143 | protein_coding | 110.621169 | -3.4344925 | 0.40140273 | -8.556226  | 1.1662E-17 | 5.9263E-17 |
| GLYCTK  | ENSG00000168237 | protein_coding | 788.006837 | -1.0750268 | 0.11418844 | -9.4144975 | 4.7535E-21 | 2.9373E-20 |
| PDHB    | ENSG00000168291 | protein_coding | 3089.66759 | -1.1617235 | 0.06585699 | -17.640093 | 1.2126E-69 | 5.7663E-68 |
| ACOX2   | ENSG00000168306 | protein_coding | 936.649276 | -1.9143946 | 0.12791222 | -14.966472 | 1.216E-50  | 2.9588E-49 |

|         |                 |                |            |            |            |            |            |            |
|---------|-----------------|----------------|------------|------------|------------|------------|------------|------------|
| FAM107A | ENSG00000168309 | protein_coding | 2293.90666 | -1.5439686 | 0.12735889 | -12.122975 | 7.9809E-34 | 9.5101E-33 |
| DEGS2   | ENSG00000168350 | protein_coding | 387.922347 | -2.9854587 | 0.17247597 | -17.309419 | 3.9943E-67 | 1.7306E-65 |
| BDKRB2  | ENSG00000168398 | protein_coding | 1666.82545 | -1.1587115 | 0.19944802 | -5.8095916 | 6.2625E-09 | 1.7304E-08 |
| MTNR1A  | ENSG00000168412 | protein_coding | 12.029794  | -3.0176277 | 0.29202906 | -10.333313 | 4.981E-25  | 3.8138E-24 |
| SCNN1B  | ENSG00000168447 | protein_coding | 1110.04733 | -3.9727714 | 0.30342588 | -13.093054 | 3.6081E-39 | 5.4586E-38 |
| TNXB    | ENSG00000168477 | protein_coding | 1055.42659 | -1.1358166 | 0.15491204 | -7.3320101 | 2.2673E-13 | 8.7141E-13 |
| PHYHIP  | ENSG00000168490 | protein_coding | 101.884006 | -1.8393384 | 0.15180976 | -12.116075 | 8.6819E-34 | 1.0316E-32 |
| CHRM1   | ENSG00000168539 | protein_coding | 10.8616125 | -1.8240075 | 0.2705706  | -6.7413367 | 1.5694E-11 | 5.3019E-11 |
| SLC20A2 | ENSG00000168575 | protein_coding | 2115.49455 | -1.392815  | 0.06200526 | -22.462853 | 9.583E-112 | 2.133E-109 |
| GDNF    | ENSG00000168621 | protein_coding | 42.4353704 | -1.8544523 | 0.2859547  | -6.485126  | 8.8658E-11 | 2.8353E-10 |
| AXIN2   | ENSG00000168646 | protein_coding | 166.961639 | -1.1255883 | 0.10999803 | -10.232804 | 1.4137E-24 | 1.057E-23  |
| VWA3B   | ENSG00000168658 | protein_coding | 12.7839984 | -2.2599544 | 0.1838261  | -12.29398  | 9.7581E-35 | 1.2136E-33 |
| UGT3A2  | ENSG00000168671 | protein_coding | 65.3392996 | -1.8044821 | 0.29578268 | -6.1007026 | 1.056E-09  | 3.1138E-09 |
| LRP1B   | ENSG00000168702 | protein_coding | 61.4291548 | -2.5595026 | 0.26164645 | -9.7822943 | 1.3413E-22 | 9.012E-22  |
| WFDC12  | ENSG00000168703 | protein_coding | 7.54705838 | -1.174899  | 0.41652143 | -2.8207407 | 0.00479129 | 0.00747575 |
| NPNT    | ENSG00000168743 | protein_coding | 4437.67211 | -2.0218277 | 0.14923587 | -13.547867 | 8.1566E-42 | 1.3696E-40 |
| NSG1    | ENSG00000168824 | protein_coding | 128.358372 | -1.2542864 | 0.23547273 | -5.3266737 | 1.0003E-07 | 2.4999E-07 |
| PLA2G4F | ENSG00000168907 | protein_coding | 665.358904 | -2.2385013 | 0.47883645 | -4.6748766 | 2.9413E-06 | 6.4421E-06 |
| ENHO    | ENSG00000168913 | protein_coding | 18.5145041 | -1.5456893 | 0.14908938 | -10.367535 | 3.484E-25  | 2.6919E-24 |
| UQCRFS1 | ENSG00000169021 | protein_coding | 3758.92691 | -1.2242964 | 0.09856309 | -12.421449 | 1.9991E-35 | 2.572E-34  |
| COL4A3  | ENSG00000169031 | protein_coding | 1699.40218 | -1.9798595 | 0.14918098 | -13.271528 | 3.386E-40  | 5.3249E-39 |
| KLK7    | ENSG00000169035 | protein_coding | 78.4848935 | -5.8163653 | 0.41106132 | -14.149629 | 1.8774E-45 | 3.6748E-44 |
| IRS1    | ENSG00000169047 | protein_coding | 1608.90031 | -1.0383114 | 0.13707075 | -7.5750033 | 3.5912E-14 | 1.4579E-13 |
| PARM1   | ENSG00000169116 | protein_coding | 4906.27145 | -1.1437457 | 0.1144084  | -9.997043  | 1.5702E-23 | 1.1068E-22 |
| AFAP1L2 | ENSG00000169129 | protein_coding | 2052.33931 | -1.8670803 | 0.09998499 | -18.673606 | 8.1182E-78 | 5.2787E-76 |

|         |                 |                |            |            |            |            |            |            |
|---------|-----------------|----------------|------------|------------|------------|------------|------------|------------|
| PCSK9   | ENSG00000169174 | protein_coding | 16.2477701 | -1.3297118 | 0.31807666 | -4.1804759 | 2.909E-05  | 5.7903E-05 |
| GSG1L   | ENSG00000169181 | protein_coding | 5.03133103 | -1.7490245 | 0.27943612 | -6.259121  | 3.8715E-10 | 1.181E-09  |
| RAB3B   | ENSG00000169213 | protein_coding | 151.943098 | -2.1115852 | 0.27806735 | -7.5937904 | 3.1068E-14 | 1.2661E-13 |
| RSPO1   | ENSG00000169218 | protein_coding | 9.31597373 | -2.9943625 | 0.33445463 | -8.9529706 | 3.4604E-19 | 1.9291E-18 |
| HSPB3   | ENSG00000169271 | protein_coding | 5.52065092 | -1.1007246 | 0.35579767 | -3.0936812 | 0.0019769  | 0.00322513 |
| STK32A  | ENSG00000169302 | protein_coding | 321.760319 | -1.3364237 | 0.24937401 | -5.3591138 | 8.3631E-08 | 2.1062E-07 |
| PDILT   | ENSG00000169340 | protein_coding | 4.69494658 | -3.0827238 | 0.19369477 | -15.915369 | 4.9574E-57 | 1.51E-55   |
| UMOD    | ENSG00000169344 | protein_coding | 65470.7177 | -8.4940238 | 0.47727911 | -17.796764 | 7.4872E-71 | 3.7226E-69 |
| GP2     | ENSG00000169347 | protein_coding | 88.9504375 | -6.8794391 | 0.35903795 | -19.160758 | 7.8719E-82 | 5.8109E-80 |
| SPRR1A  | ENSG00000169474 | protein_coding | 1.76505541 | -1.1996785 | 0.5386307  | -2.2272747 | 0.02592892 | 0.03659507 |
| CCDC8   | ENSG00000169515 | protein_coding | 1151.5641  | -1.312739  | 0.1899433  | -6.9112151 | 4.8052E-12 | 1.6834E-11 |
| MUC15   | ENSG00000169550 | protein_coding | 661.594303 | -7.2307325 | 0.42100228 | -17.175044 | 4.0835E-66 | 1.7017E-64 |
| GJB1    | ENSG00000169562 | protein_coding | 1188.84104 | -1.4893003 | 0.16588102 | -8.9781238 | 2.7542E-19 | 1.5433E-18 |
| DCXR    | ENSG00000169738 | protein_coding | 2439.39349 | -2.0826292 | 0.13689271 | -15.213587 | 2.8736E-52 | 7.4717E-51 |
| TACR3   | ENSG00000169836 | protein_coding | 9.19463573 | -3.9670396 | 0.35799008 | -11.081423 | 1.544E-28  | 1.4215E-27 |
| PCDH7   | ENSG00000169851 | protein_coding | 405.88961  | -1.387154  | 0.18981749 | -7.3078305 | 2.7149E-13 | 1.0376E-12 |
| CHD3    | ENSG00000170004 | protein_coding | 6354.21798 | -1.0223367 | 0.08293153 | -12.327479 | 6.4431E-35 | 8.0699E-34 |
| RNF150  | ENSG00000170153 | protein_coding | 1197.12167 | -3.1037394 | 0.16415952 | -18.90685  | 1.0016E-79 | 6.936E-78  |
| GYPA    | ENSG00000170180 | protein_coding | 39.9822952 | -1.2218029 | 0.26339593 | -4.6386553 | 3.5068E-06 | 7.626E-06  |
| SLC16A5 | ENSG00000170190 | protein_coding | 870.23758  | -3.0210841 | 0.15017563 | -20.117006 | 5.2377E-90 | 5.2556E-88 |
| CST5    | ENSG00000170367 | protein_coding | 10.1468346 | -1.4166803 | 0.39237413 | -3.6105343 | 0.00030557 | 0.00054548 |
| LRRN2   | ENSG00000170382 | protein_coding | 623.805521 | -2.3104993 | 0.23006096 | -10.042987 | 9.8641E-24 | 7.0301E-23 |
| ZNF804A | ENSG00000170396 | protein_coding | 48.0606039 | -1.2549441 | 0.15790345 | -7.9475404 | 1.9025E-15 | 8.4264E-15 |
| SLC23A1 | ENSG00000170482 | protein_coding | 939.959575 | -1.6100208 | 0.19626733 | -8.2032031 | 2.3407E-16 | 1.0959E-15 |
| LONRF2  | ENSG00000170500 | protein_coding | 419.027802 | -1.8684446 | 0.21941567 | -8.5155476 | 1.658E-17  | 8.3542E-17 |

|          |                 |                |            |            |            |            |            |            |
|----------|-----------------|----------------|------------|------------|------------|------------|------------|------------|
| PFKFB3   | ENSG00000170525 | protein_coding | 15146.888  | -1.261146  | 0.11403593 | -11.059199 | 1.9786E-28 | 1.8133E-27 |
| IRX1     | ENSG00000170549 | protein_coding | 154.180749 | -4.5755294 | 0.2423514  | -18.879732 | 1.6743E-79 | 1.1456E-77 |
| IRX2     | ENSG00000170561 | protein_coding | 241.714034 | -5.0276362 | 0.19483245 | -25.804922 | 7.808E-147 | 5.041E-144 |
| SIX2     | ENSG00000170577 | protein_coding | 49.1348877 | -1.0311617 | 0.21806524 | -4.7286846 | 2.2598E-06 | 5.001E-06  |
| DLGAP1   | ENSG00000170579 | protein_coding | 118.41854  | -1.7400605 | 0.22212769 | -7.8336048 | 4.7408E-15 | 2.0433E-14 |
| FOXA3    | ENSG00000170608 | protein_coding | 52.3740228 | -2.8215942 | 0.29694382 | -9.5021148 | 2.0567E-21 | 1.2977E-20 |
| OR10A3   | ENSG00000170683 | protein_coding | 0.26950593 | -1.7702888 | 0.51849922 | -3.4142556 | 0.00063957 | 0.0011029  |
| HOXB9    | ENSG00000170689 | protein_coding | 742.990607 | -3.2719674 | 0.23279342 | -14.05524  | 7.1539E-45 | 1.3659E-43 |
| CEL      | ENSG00000170835 | protein_coding | 117.807    | -3.7332615 | 0.22254667 | -16.775185 | 3.707E-63  | 1.3861E-61 |
| GPR27    | ENSG00000170837 | protein_coding | 185.916153 | -1.8389836 | 0.18143143 | -10.13597  | 3.8256E-24 | 2.7889E-23 |
| RIOX2    | ENSG00000170854 | protein_coding | 799.932388 | -1.2156792 | 0.09675109 | -12.565018 | 3.288E-36  | 4.3777E-35 |
| PAQR8    | ENSG00000170915 | protein_coding | 1040.02691 | -1.3397745 | 0.09196515 | -14.568285 | 4.4697E-48 | 9.7942E-47 |
| PKHD1    | ENSG00000170927 | protein_coding | 4489.61478 | -1.2621636 | 0.17379533 | -7.2623559 | 3.8041E-13 | 1.4386E-12 |
| HAS2     | ENSG00000170961 | protein_coding | 108.569313 | -1.0301854 | 0.20172406 | -5.1069043 | 3.2748E-07 | 7.833E-07  |
| HS6ST2   | ENSG00000171004 | protein_coding | 397.519403 | -6.2620559 | 0.26817939 | -23.350251 | 1.37E-120  | 3.83E-118  |
| PYGO1    | ENSG00000171016 | protein_coding | 206.625329 | -1.6250497 | 0.17009292 | -9.5538938 | 1.2491E-21 | 7.9717E-21 |
| PATE1    | ENSG00000171053 | protein_coding | 0.83165028 | -2.9287362 | 0.46894685 | -6.2453478 | 4.2286E-10 | 1.2871E-09 |
| FUT3     | ENSG00000171124 | protein_coding | 163.333726 | -2.3221591 | 0.22208346 | -10.456245 | 1.3718E-25 | 1.0856E-24 |
| KCNG3    | ENSG00000171126 | protein_coding | 11.2989055 | -1.6222746 | 0.39731524 | -4.0830917 | 4.444E-05  | 8.6874E-05 |
| ATP6V0E2 | ENSG00000171130 | protein_coding | 2010.5506  | -1.2892761 | 0.11974699 | -10.766668 | 4.9458E-27 | 4.2314E-26 |
| UGT2B7   | ENSG00000171234 | protein_coding | 15711.7727 | -1.3226943 | 0.16250438 | -8.1394377 | 3.9712E-16 | 1.8323E-15 |
| SOSTDC1  | ENSG00000171243 | protein_coding | 531.867659 | -2.9162394 | 0.28855899 | -10.106216 | 5.1849E-24 | 3.753E-23  |
| NPTX1    | ENSG00000171246 | protein_coding | 42.6304392 | -1.0757611 | 0.2317477  | -4.6419492 | 3.4514E-06 | 7.5101E-06 |
| LURAP1   | ENSG00000171357 | protein_coding | 149.353502 | -1.7775097 | 0.12812689 | -13.873042 | 9.2279E-44 | 1.6921E-42 |
| CLCN5    | ENSG00000171365 | protein_coding | 5827.49943 | -1.4334185 | 0.1200511  | -11.94007  | 7.3162E-33 | 8.3159E-32 |



|          |                 |                |            |            |            |            |            |            |
|----------|-----------------|----------------|------------|------------|------------|------------|------------|------------|
| XAGE3    | ENSG00000171402 | protein_coding | 1.88083744 | -1.1164308 | 0.23712112 | -4.7082723 | 2.4983E-06 | 5.5056E-06 |
| GLOD5    | ENSG00000171433 | protein_coding | 59.7205395 | -2.4118635 | 0.19529154 | -12.350066 | 4.8671E-35 | 6.1295E-34 |
| KSR2     | ENSG00000171435 | protein_coding | 201.447714 | -3.230189  | 0.21174072 | -15.255399 | 1.5157E-52 | 3.9794E-51 |
| PTGER4   | ENSG00000171522 | protein_coding | 772.566346 | -1.0179497 | 0.10225067 | -9.9554332 | 2.3878E-23 | 1.665E-22  |
| MAP6     | ENSG00000171533 | protein_coding | 354.818098 | -2.4045776 | 0.13611449 | -17.665845 | 7.6853E-70 | 3.6775E-68 |
| SLC25A33 | ENSG00000171612 | protein_coding | 386.638094 | -1.7345975 | 0.09370438 | -18.511381 | 1.6716E-76 | 1.0369E-74 |
| ANO5     | ENSG00000171714 | protein_coding | 398.162356 | -1.9596226 | 0.26604333 | -7.3658026 | 1.7608E-13 | 6.8325E-13 |
| SPATA46  | ENSG00000171722 | protein_coding | 4.88379409 | -1.6371639 | 0.2046362  | -8.000363  | 1.2405E-15 | 5.5583E-15 |
| GPHN     | ENSG00000171723 | protein_coding | 1403.92679 | -1.1566808 | 0.11908658 | -9.7129402 | 2.6556E-22 | 1.7536E-21 |
| VAT1L    | ENSG00000171724 | protein_coding | 426.926846 | -2.4050914 | 0.27420149 | -8.7712558 | 1.7668E-18 | 9.452E-18  |
| PAH      | ENSG00000171759 | protein_coding | 3935.1818  | -2.9020716 | 0.3233492  | -8.9750388 | 2.8325E-19 | 1.5862E-18 |
| GATM     | ENSG00000171766 | protein_coding | 26660.6938 | -2.2086006 | 0.16075057 | -13.739302 | 5.9042E-43 | 1.0478E-41 |
| CFAP46   | ENSG00000171811 | protein_coding | 136.580569 | -1.0670786 | 0.1715414  | -6.2205311 | 4.9547E-10 | 1.4998E-09 |
| PCDHB1   | ENSG00000171815 | protein_coding | 29.3667973 | -2.8530575 | 0.2597144  | -10.985365 | 4.4942E-28 | 4.0499E-27 |
| ANGPTL7  | ENSG00000171819 | protein_coding | 30.1613362 | -1.1464004 | 0.34164604 | -3.3555208 | 0.00079216 | 0.0013519  |
| ADRA1D   | ENSG00000171873 | protein_coding | 14.5341112 | -1.0594755 | 0.19870064 | -5.3320185 | 9.7127E-08 | 2.431E-07  |
| AQP4     | ENSG00000171885 | protein_coding | 277.613536 | -1.3430536 | 0.20515354 | -6.5465779 | 5.887E-11  | 1.9067E-10 |
| TLN2     | ENSG00000171914 | protein_coding | 5850.95945 | -1.1530854 | 0.1028779  | -11.208291 | 3.7129E-29 | 3.5452E-28 |
| ZNF556   | ENSG00000172000 | protein_coding | 41.537763  | -1.1867927 | 0.19177924 | -6.1883272 | 6.0806E-10 | 1.8273E-09 |
| MAL      | ENSG00000172005 | protein_coding | 5765.92541 | -3.2746424 | 0.25813427 | -12.685811 | 7.0877E-37 | 9.7335E-36 |
| CCL11    | ENSG00000172156 | protein_coding | 40.1022345 | -2.4240026 | 0.28839233 | -8.4052257 | 4.2704E-17 | 2.0982E-16 |
| PRL      | ENSG00000172179 | protein_coding | 1.88985091 | -2.1386228 | 0.25324464 | -8.4448888 | 3.0434E-17 | 1.5094E-16 |
| GPR22    | ENSG00000172209 | protein_coding | 15.1427593 | -1.8398991 | 0.34421448 | -5.3452111 | 9.0312E-08 | 2.2662E-07 |
| SUCLG2   | ENSG00000172340 | protein_coding | 4671.25878 | -1.2854121 | 0.08072856 | -15.922644 | 4.4133E-57 | 1.3487E-55 |
| CSDC2    | ENSG00000172346 | protein_coding | 819.221594 | -1.3896603 | 0.27079286 | -5.1318202 | 2.8695E-07 | 6.8993E-07 |

|          |                 |                |            |            |            |            |            |            |
|----------|-----------------|----------------|------------|------------|------------|------------|------------|------------|
| ARNT2    | ENSG00000172379 | protein_coding | 2721.85301 | -1.7745108 | 0.14837347 | -11.959758 | 5.773E-33  | 6.5978E-32 |
| MYOZ2    | ENSG00000172399 | protein_coding | 14.577639  | -3.1386038 | 0.16759181 | -18.727669 | 2.9453E-78 | 1.9427E-76 |
| TTC36    | ENSG00000172425 | protein_coding | 47.7907913 | -2.7737131 | 0.19079949 | -14.53732  | 7.0291E-48 | 1.5214E-46 |
| FUT9     | ENSG00000172461 | protein_coding | 49.4810752 | -1.3269476 | 0.40352229 | -3.2884121 | 0.00100754 | 0.00170023 |
| MAB21L4  | ENSG00000172478 | protein_coding | 161.020415 | -3.8297517 | 0.32723293 | -11.703442 | 1.2239E-31 | 1.3142E-30 |
| AGXT     | ENSG00000172482 | protein_coding | 191.653616 | -3.6381937 | 0.20903664 | -17.404574 | 7.617E-68  | 3.3802E-66 |
| ACOT12   | ENSG00000172497 | protein_coding | 24.1074794 | -4.2927547 | 0.2970077  | -14.453345 | 2.388E-47  | 5.0633E-46 |
| MS4A10   | ENSG00000172689 | protein_coding | 12.3709234 | -1.3334876 | 0.40520515 | -3.290895  | 0.00099869 | 0.00168629 |
| COL6A5   | ENSG00000172752 | protein_coding | 6.17090727 | -1.6967666 | 0.31122171 | -5.4519544 | 4.9819E-08 | 1.2771E-07 |
| FADS6    | ENSG00000172782 | protein_coding | 30.3876494 | -1.0879025 | 0.35536807 | -3.0613399 | 0.00220349 | 0.00357608 |
| OVOL1    | ENSG00000172818 | protein_coding | 232.587416 | -2.3319198 | 0.19127552 | -12.191418 | 3.4536E-34 | 4.1827E-33 |
| PDP2     | ENSG00000172840 | protein_coding | 893.899017 | -1.5122346 | 0.09498855 | -15.920178 | 4.5907E-57 | 1.4016E-55 |
| MRGPRF   | ENSG00000172935 | protein_coding | 279.965171 | -2.2137793 | 0.18917375 | -11.70236  | 1.2396E-31 | 1.3304E-30 |
| SLC22A13 | ENSG00000172940 | protein_coding | 160.255322 | -2.9186751 | 0.26599244 | -10.972775 | 5.1662E-28 | 4.6427E-27 |
| ADH6     | ENSG00000172955 | protein_coding | 675.527368 | -2.6355682 | 0.20302099 | -12.981752 | 1.5529E-38 | 2.2794E-37 |
| FRG2C    | ENSG00000172969 | protein_coding | 40.6857244 | -4.09976   | 0.33637083 | -12.188215 | 3.592E-34  | 4.3458E-33 |
| HPSE2    | ENSG00000172987 | protein_coding | 64.351201  | -2.3844299 | 0.21818206 | -10.928625 | 8.4113E-28 | 7.4783E-27 |
| RXFP4    | ENSG00000173080 | protein_coding | 4.1697381  | -2.4192301 | 0.18455889 | -13.108175 | 2.9563E-39 | 4.4844E-38 |
| DMRT2    | ENSG00000173253 | protein_coding | 803.811672 | -1.6398925 | 0.49359865 | -3.3223197 | 0.00089272 | 0.00151523 |
| TRIB1    | ENSG00000173334 | protein_coding | 3373.04981 | -1.0018126 | 0.11744263 | -8.5302296 | 1.4606E-17 | 7.3876E-17 |
| CST9     | ENSG00000173335 | protein_coding | 2.82099792 | -5.4990693 | 0.33038261 | -16.644549 | 3.3146E-62 | 1.203E-60  |
| NDNF     | ENSG00000173376 | protein_coding | 1390.34297 | -2.4405751 | 0.33802229 | -7.2201602 | 5.1926E-13 | 1.9454E-12 |
| DAG1     | ENSG00000173402 | protein_coding | 6919.04807 | -1.1535924 | 0.06617567 | -17.432272 | 4.6943E-68 | 2.0953E-66 |
| AGR3     | ENSG00000173467 | protein_coding | 30.3515974 | -1.9981377 | 0.44220095 | -4.5186192 | 6.2244E-06 | 1.322E-05  |
| MOB1B    | ENSG00000173542 | protein_coding | 3895.59557 | -1.0277807 | 0.14071143 | -7.3041732 | 2.7898E-13 | 1.0649E-12 |

|          |                 |                |            |            |            |            |            |            |
|----------|-----------------|----------------|------------|------------|------------|------------|------------|------------|
| ADGRF3   | ENSG00000173567 | protein_coding | 97.5885024 | -3.5465226 | 0.12603776 | -28.138572 | 3.307E-174 | 4.458E-171 |
| CCR9     | ENSG00000173585 | protein_coding | 13.2093518 | -1.4970169 | 0.18961246 | -7.8951396 | 2.8999E-15 | 1.267E-14  |
| NUDT4    | ENSG00000173598 | protein_coding | 3134.85771 | -1.8025859 | 0.08718879 | -20.674514 | 5.8756E-95 | 7.2795E-93 |
| PC       | ENSG00000173599 | protein_coding | 2125.96084 | -1.4307721 | 0.13676236 | -10.461739 | 1.2946E-25 | 1.0266E-24 |
| UGT2A1   | ENSG00000173610 | protein_coding | 51.7636279 | -4.6970073 | 0.49816138 | -9.4286861 | 4.1526E-21 | 2.5759E-20 |
| HSPB7    | ENSG00000173641 | protein_coding | 680.916418 | -3.2424904 | 0.23037504 | -14.074834 | 5.4232E-45 | 1.0415E-43 |
| TAS1R1   | ENSG00000173662 | protein_coding | 9.25513759 | -1.0911884 | 0.17677236 | -6.1728452 | 6.7072E-10 | 2.0083E-09 |
| MUC13    | ENSG00000173702 | protein_coding | 436.718663 | -2.5354112 | 0.28681625 | -8.8398452 | 9.5851E-19 | 5.2073E-18 |
| WFIKKN2  | ENSG00000173714 | protein_coding | 10.0616087 | -1.9045843 | 0.30296015 | -6.2865837 | 3.2453E-10 | 9.951E-10  |
| CNP      | ENSG00000173786 | protein_coding | 5613.13412 | -1.3129979 | 0.06046096 | -21.71646  | 1.434E-104 | 2.609E-102 |
| JUP      | ENSG00000173801 | protein_coding | 14715.1681 | -1.0378473 | 0.08425217 | -12.318345 | 7.216E-35  | 9.0182E-34 |
| HAP1     | ENSG00000173805 | protein_coding | 37.1521016 | -1.5953636 | 0.23352228 | -6.8317406 | 8.389E-12  | 2.8908E-11 |
| KCNH6    | ENSG00000173826 | protein_coding | 203.55301  | -2.0169313 | 0.22937925 | -8.7929979 | 1.4562E-18 | 7.8322E-18 |
| MARCHF10 | ENSG00000173838 | protein_coding | 56.0558267 | -1.8721898 | 0.30589125 | -6.1204426 | 9.3316E-10 | 2.7623E-09 |
| SPTBN2   | ENSG00000173898 | protein_coding | 2777.53013 | -4.3120272 | 0.27076298 | -15.925468 | 4.2185E-57 | 1.2918E-55 |
| CBY2     | ENSG00000174015 | protein_coding | 5.42733258 | -1.9459956 | 0.31856204 | -6.1086864 | 1.0045E-09 | 2.966E-09  |
| TENT5D   | ENSG00000174016 | protein_coding | 1.6019662  | -3.1309952 | 0.28247737 | -11.084056 | 1.4992E-28 | 1.3823E-27 |
| SLC25A30 | ENSG00000174032 | protein_coding | 3114.63145 | -1.0219878 | 0.08251917 | -12.384853 | 3.1566E-35 | 4.0118E-34 |
| SELP     | ENSG00000174175 | protein_coding | 754.363106 | -1.1240707 | 0.13700182 | -8.2047871 | 2.31E-16   | 1.0819E-15 |
| ZHX3     | ENSG00000174306 | protein_coding | 4577.31916 | -1.3059205 | 0.07241131 | -18.034758 | 1.0395E-72 | 5.5152E-71 |
| SLC6A19  | ENSG00000174358 | protein_coding | 4411.85815 | -2.2141235 | 0.33454634 | -6.6182863 | 3.6339E-11 | 1.1958E-10 |
| LINGO2   | ENSG00000174482 | protein_coding | 18.5101861 | -2.4416096 | 0.2869458  | -8.5089576 | 1.755E-17  | 8.8332E-17 |
| IGDCC3   | ENSG00000174498 | protein_coding | 22.6536989 | -1.7211603 | 0.2182256  | -7.8870687 | 3.0937E-15 | 1.3487E-14 |
| MFSD4A   | ENSG00000174514 | protein_coding | 3784.53336 | -5.2474125 | 0.12572422 | -41.737485 | 0          | 0          |
| AKIRIN1  | ENSG00000174574 | protein_coding | 2774.00288 | -1.0981817 | 0.06743047 | -16.286134 | 1.2381E-59 | 4.1459E-58 |

|         |                 |                |            |            |            |            |            |            |
|---------|-----------------|----------------|------------|------------|------------|------------|------------|------------|
| TRAM1L1 | ENSG00000174599 | protein_coding | 346.250649 | -1.5100703 | 0.10013533 | -15.080294 | 2.1829E-51 | 5.4533E-50 |
| UGT8    | ENSG00000174607 | protein_coding | 2593.5182  | -1.7084058 | 0.15077861 | -11.330558 | 9.2612E-30 | 9.0792E-29 |
| SLC29A2 | ENSG00000174669 | protein_coding | 392.714737 | -1.8793701 | 0.17193214 | -10.930883 | 8.2046E-28 | 7.3016E-27 |
| WDR49   | ENSG00000174776 | protein_coding | 7.93174359 | -2.0572701 | 0.20297492 | -10.135588 | 3.8406E-24 | 2.799E-23  |
| BTC     | ENSG00000174808 | protein_coding | 247.262695 | -1.7931647 | 0.14263281 | -12.571895 | 3.0141E-36 | 4.0201E-35 |
| ZG16    | ENSG00000174992 | protein_coding | 1.89232957 | -2.423815  | 0.32867145 | -7.3745832 | 1.6486E-13 | 6.4056E-13 |
| SLC22A1 | ENSG00000175003 | protein_coding | 37.1265841 | -1.0769735 | 0.14538901 | -7.4075305 | 1.2867E-13 | 5.038E-13  |
| DES     | ENSG00000175084 | protein_coding | 1150.82575 | -1.7050587 | 0.29826108 | -5.7166651 | 1.0863E-08 | 2.9403E-08 |
| RAG2    | ENSG00000175097 | protein_coding | 4.44535327 | -3.8780006 | 0.23826966 | -16.275679 | 1.4688E-59 | 4.9111E-58 |
| CADM2   | ENSG00000175161 | protein_coding | 14.2438129 | -2.0623415 | 0.29709733 | -6.941636  | 3.8758E-12 | 1.367E-11  |
| PPM1E   | ENSG00000175175 | protein_coding | 160.832176 | -1.4160899 | 0.25166719 | -5.6268357 | 1.8355E-08 | 4.8799E-08 |
| PCCA    | ENSG00000175198 | protein_coding | 3144.27314 | -1.4788622 | 0.09883714 | -14.962616 | 1.2886E-50 | 3.132E-49  |
| GAL3ST3 | ENSG00000175229 | protein_coding | 72.9655802 | -4.3526804 | 0.30853969 | -14.10736  | 3.4215E-45 | 6.6347E-44 |
| PHYHD1  | ENSG00000175287 | protein_coding | 699.790075 | -2.2371269 | 0.18946425 | -11.807646 | 3.564E-32  | 3.9264E-31 |
| CST6    | ENSG00000175315 | protein_coding | 29.9734347 | -1.8214073 | 0.23687939 | -7.6891758 | 1.4809E-14 | 6.1645E-14 |
| ISX     | ENSG00000175329 | protein_coding | 3.16204511 | -2.6315112 | 0.4594768  | -5.7271906 | 1.0211E-08 | 2.7696E-08 |
| APOF    | ENSG00000175336 | protein_coding | 2.02989054 | -1.5358909 | 0.2308566  | -6.6530085 | 2.8716E-11 | 9.5279E-11 |
| LPL     | ENSG00000175445 | protein_coding | 2278.427   | -1.2337327 | 0.13874889 | -8.8918382 | 6.0106E-19 | 3.3069E-18 |
| DPP10   | ENSG00000175497 | protein_coding | 35.0084814 | -1.4320998 | 0.43687893 | -3.2780244 | 0.00104536 | 0.00176133 |
| P2RY2   | ENSG00000175591 | protein_coding | 83.4834935 | -1.4162003 | 0.13515878 | -10.47805  | 1.0897E-25 | 8.6828E-25 |
| TOM1L2  | ENSG00000175662 | protein_coding | 4135.4469  | -1.067858  | 0.06331433 | -16.865975 | 8.0069E-64 | 3.0638E-62 |
| KDF1    | ENSG00000175707 | protein_coding | 296.159085 | -2.0371676 | 0.16574219 | -12.291183 | 1.0102E-34 | 1.256E-33  |
| MSRA    | ENSG00000175806 | protein_coding | 2336.63179 | -1.2995441 | 0.12069226 | -10.767418 | 4.9056E-27 | 4.1979E-26 |
| ETV4    | ENSG00000175832 | protein_coding | 105.121871 | -1.3021142 | 0.22230127 | -5.8574305 | 4.7008E-09 | 1.3127E-08 |
| CALCB   | ENSG00000175868 | protein_coding | 12.0953045 | -1.3681673 | 0.21354079 | -6.4070535 | 1.4836E-10 | 4.662E-10  |

|          |                 |                |            |            |            |            |            |            |
|----------|-----------------|----------------|------------|------------|------------|------------|------------|------------|
| HOXD8    | ENSG00000175879 | protein_coding | 2307.00115 | -1.7771414 | 0.09048475 | -19.640231 | 7.0078E-86 | 6.0498E-84 |
| ARL4D    | ENSG00000175906 | protein_coding | 783.097008 | -2.687385  | 0.18630558 | -14.424608 | 3.6232E-47 | 7.6259E-46 |
| DOK7     | ENSG00000175920 | protein_coding | 84.2638934 | -2.3663212 | 0.207349   | -11.412263 | 3.6316E-30 | 3.6198E-29 |
| LRRN1    | ENSG00000175928 | protein_coding | 60.229631  | -1.7544299 | 0.25090333 | -6.9924538 | 2.7012E-12 | 9.6392E-12 |
| PLEKHD1  | ENSG00000175985 | protein_coding | 63.3289588 | -2.4743407 | 0.23771748 | -10.408745 | 2.2618E-25 | 1.7691E-24 |
| ASCL3    | ENSG00000176009 | protein_coding | 1.87157974 | -1.4486654 | 0.24697143 | -5.8657204 | 4.4719E-09 | 1.2513E-08 |
| C11orf16 | ENSG00000176029 | protein_coding | 12.0460849 | -2.0392274 | 0.1669124  | -12.217351 | 2.5113E-34 | 3.0593E-33 |
| GPX2     | ENSG00000176153 | protein_coding | 75.5683015 | -1.4543986 | 0.23680627 | -6.1417234 | 8.1631E-10 | 2.428E-09  |
| ACBD7    | ENSG00000176244 | protein_coding | 12.3263293 | -1.6523763 | 0.13720981 | -12.042698 | 2.1191E-33 | 2.4699E-32 |
| PRR18    | ENSG00000176381 | protein_coding | 8.1340583  | -1.6788103 | 0.29045255 | -5.7799813 | 7.4709E-09 | 2.0482E-08 |
| HSD11B2  | ENSG00000176387 | protein_coding | 7979.53855 | -2.7792375 | 0.22124752 | -12.561666 | 3.4303E-36 | 4.5619E-35 |
| DIRAS1   | ENSG00000176490 | protein_coding | 171.183786 | -2.2071521 | 0.28545901 | -7.7319408 | 1.0592E-14 | 4.4594E-14 |
| PRR15    | ENSG00000176532 | protein_coding | 289.317042 | -3.9267427 | 0.19734073 | -19.898288 | 4.2106E-88 | 3.9472E-86 |
| GNG7     | ENSG00000176533 | protein_coding | 971.721607 | -1.4078687 | 0.09941963 | -14.160873 | 1.6E-45    | 3.1451E-44 |
| RNF152   | ENSG00000176641 | protein_coding | 6790.06875 | -1.1956293 | 0.15317824 | -7.8054774 | 5.9277E-15 | 2.5386E-14 |
| TCIM     | ENSG00000176907 | protein_coding | 4001.13985 | -2.1765326 | 0.1510098  | -14.413188 | 4.2751E-47 | 8.9733E-46 |
| FUT2     | ENSG00000176920 | protein_coding | 64.3016082 | -1.8721642 | 0.15886033 | -11.78497  | 4.6659E-32 | 5.1047E-31 |
| GCNT4    | ENSG00000176928 | protein_coding | 449.376358 | -1.6119253 | 0.15758636 | -10.228838 | 1.4728E-24 | 1.1005E-23 |
| SHMT1    | ENSG00000176974 | protein_coding | 10161.1514 | -1.0607017 | 0.1016547  | -10.43436  | 1.7277E-25 | 1.3611E-24 |
| B3GNT8   | ENSG00000177191 | protein_coding | 185.576329 | -1.2591719 | 0.15745837 | -7.9968559 | 1.2764E-15 | 5.715E-15  |
| C10orf71 | ENSG00000177354 | protein_coding | 16.5544734 | -1.4462622 | 0.59447927 | -2.432822  | 0.01498166 | 0.02186901 |
| UMODL1   | ENSG00000177398 | protein_coding | 16.8095431 | -2.1962383 | 0.3139619  | -6.9952381 | 2.6481E-12 | 9.4585E-12 |
| UBE2U    | ENSG00000177414 | protein_coding | 4.03707173 | -1.6518983 | 0.3178377  | -5.1973015 | 2.022E-07  | 4.9246E-07 |
| RPRM     | ENSG00000177519 | protein_coding | 24.9395151 | -3.2928942 | 0.34830591 | -9.4540291 | 3.2603E-21 | 2.034E-20  |
| SAMD12   | ENSG00000177570 | protein_coding | 720.705408 | -1.8332588 | 0.15512053 | -11.818286 | 3.1402E-32 | 3.4671E-31 |

|          |                 |                |            |            |            |            |            |            |
|----------|-----------------|----------------|------------|------------|------------|------------|------------|------------|
| DNAJC28  | ENSG00000177692 | protein_coding | 116.669888 | -1.1544595 | 0.08879334 | -13.001646 | 1.1974E-38 | 1.7627E-37 |
| NAALADL2 | ENSG00000177694 | protein_coding | 525.310171 | -1.8801889 | 0.11094829 | -16.946533 | 2.0414E-64 | 8.0189E-63 |
| MYOZ1    | ENSG00000177791 | protein_coding | 99.9409174 | -1.4496969 | 0.13459526 | -10.770787 | 4.7294E-27 | 4.0501E-26 |
| KCNJ10   | ENSG00000177807 | protein_coding | 1060.25566 | -6.1859803 | 0.23137748 | -26.735447 | 1.823E-157 | 1.577E-154 |
| CAPZA3   | ENSG00000177938 | protein_coding | 1.92938909 | -2.5094175 | 0.49250636 | -5.0951982 | 3.4838E-07 | 8.3133E-07 |
| ALS2CL   | ENSG00000178038 | protein_coding | 986.793894 | -1.7156792 | 0.17062055 | -10.055525 | 8.6857E-24 | 6.2135E-23 |
| GRAMD1C  | ENSG00000178075 | protein_coding | 1307.99847 | -1.3947812 | 0.11607214 | -12.016502 | 2.9103E-33 | 3.3715E-32 |
| HTR3C    | ENSG00000178084 | protein_coding | 1.29372846 | -1.1941767 | 0.34796367 | -3.4319005 | 0.00059937 | 0.00103646 |
| PPP1R42  | ENSG00000178125 | protein_coding | 12.3359508 | -1.6734078 | 0.20663595 | -8.0983383 | 5.5715E-16 | 2.5477E-15 |
| SLITRK1  | ENSG00000178235 | protein_coding | 2.92474113 | -1.0889016 | 0.33515864 | -3.2489141 | 0.00115846 | 0.00194233 |
| KCNG2    | ENSG00000178342 | protein_coding | 5.49525519 | -1.5106011 | 0.15813218 | -9.5527748 | 1.2627E-21 | 8.056E-21  |
| SHISA3   | ENSG00000178343 | protein_coding | 1034.57105 | -2.1066615 | 0.24209842 | -8.7016737 | 3.2702E-18 | 1.7207E-17 |
| CALML3   | ENSG00000178363 | protein_coding | 79.7630627 | -5.6789816 | 0.32358855 | -17.550008 | 5.9472E-69 | 2.7482E-67 |
| HTR1A    | ENSG00000178394 | protein_coding | 0.50927789 | -1.5181624 | 0.41716736 | -3.6392166 | 0.00027347 | 0.00049098 |
| CCDC185  | ENSG00000178395 | protein_coding | 3.28430615 | -2.7863979 | 0.41460583 | -6.7205952 | 1.8098E-11 | 6.0856E-11 |
| GLDC     | ENSG00000178445 | protein_coding | 1358.39243 | -2.3596344 | 0.17753802 | -13.290868 | 2.6153E-40 | 4.1354E-39 |
| TUBAL3   | ENSG00000178462 | protein_coding | 47.6075896 | -3.8198945 | 0.40250648 | -9.4902683 | 2.3044E-21 | 1.45E-20   |
| CA8      | ENSG00000178538 | protein_coding | 345.493987 | -3.2546649 | 0.20409526 | -15.946793 | 2.9991E-57 | 9.2579E-56 |
| ERBB4    | ENSG00000178568 | protein_coding | 691.363168 | -3.861119  | 0.28740972 | -13.434198 | 3.8118E-41 | 6.2294E-40 |
| DEFB125  | ENSG00000178591 | protein_coding | 0.84460498 | -3.0695288 | 0.60594379 | -5.065699  | 4.069E-07  | 9.6552E-07 |
| CSRNP3   | ENSG00000178662 | protein_coding | 379.356462 | -1.6131679 | 0.11521048 | -14.00192  | 1.5172E-44 | 2.8609E-43 |
| STX19    | ENSG00000178750 | protein_coding | 9.91580302 | -1.6905721 | 0.18882226 | -8.9532458 | 3.4518E-19 | 1.925E-18  |
| ERFE     | ENSG00000178752 | protein_coding | 98.3689936 | -1.1404045 | 0.20958277 | -5.4413085 | 5.2891E-08 | 1.3536E-07 |
| CPN2     | ENSG00000178772 | protein_coding | 614.585697 | -1.1900027 | 0.40738584 | -2.9210704 | 0.00348831 | 0.00554138 |
| FOXE1    | ENSG00000178919 | protein_coding | 15.3329232 | -1.0868179 | 0.39203116 | -2.7722744 | 0.00556661 | 0.00861887 |



|         |                 |                |            |            |            |            |            |            |
|---------|-----------------|----------------|------------|------------|------------|------------|------------|------------|
| KLHDC7A | ENSG00000179023 | protein_coding | 3269.38925 | -1.0072537 | 0.13401551 | -7.5159488 | 5.65E-14   | 2.2668E-13 |
| ZFP42   | ENSG00000179059 | protein_coding | 3.03357355 | -1.4854972 | 0.37939559 | -3.9154307 | 9.0243E-05 | 0.00017069 |
| TCAIM   | ENSG00000179152 | protein_coding | 1816.95651 | -1.0648236 | 0.06085948 | -17.496429 | 1.5254E-68 | 6.9577E-67 |
| SMCO3   | ENSG00000179256 | protein_coding | 97.5613519 | -1.1760496 | 0.2241951  | -5.2456528 | 1.5573E-07 | 3.8292E-07 |
| PCARE   | ENSG00000179270 | protein_coding | 13.4757557 | -5.8134452 | 0.34955936 | -16.630781 | 4.1712E-62 | 1.5056E-60 |
| GATA2   | ENSG00000179348 | protein_coding | 1003.24099 | -1.5230913 | 0.1289287  | -11.813438 | 3.3267E-32 | 3.6694E-31 |
| EGR3    | ENSG00000179388 | protein_coding | 928.187149 | -1.1468704 | 0.197433   | -5.8089092 | 6.2881E-09 | 1.7371E-08 |
| GPC5    | ENSG00000179399 | protein_coding | 115.415694 | -5.8462631 | 0.21536209 | -27.146203 | 2.807E-162 | 2.681E-159 |
| LSMEM2  | ENSG00000179564 | protein_coding | 5.9540648  | -1.3129976 | 0.16246086 | -8.0819318 | 6.3749E-16 | 2.9031E-15 |
| TPPP2   | ENSG00000179636 | protein_coding | 12.0009942 | -4.1265235 | 0.21178212 | -19.484759 | 1.4787E-84 | 1.2105E-82 |
| PIPOX   | ENSG00000179761 | protein_coding | 1555.19255 | -2.9888691 | 0.20253947 | -14.756971 | 2.7747E-49 | 6.3852E-48 |
| FAM216B | ENSG00000179813 | protein_coding | 1.36070046 | -2.1385981 | 0.42238081 | -5.063199  | 4.1228E-07 | 9.7772E-07 |
| AKAP5   | ENSG00000179841 | protein_coding | 280.315994 | -1.3277021 | 0.12960829 | -10.24396  | 1.2597E-24 | 9.4543E-24 |
| ABCA13  | ENSG00000179869 | protein_coding | 48.7609571 | -3.4736999 | 0.26737799 | -12.99172  | 1.3633E-38 | 2.0043E-37 |
| ITLN1   | ENSG00000179914 | protein_coding | 40.2292251 | -3.6595671 | 0.24110272 | -15.178457 | 4.912E-52  | 1.2693E-50 |
| NRXN1   | ENSG00000179915 | protein_coding | 27.8636521 | -2.0140921 | 0.28815023 | -6.9897294 | 2.7542E-12 | 9.8199E-12 |
| GPBAR1  | ENSG00000179921 | protein_coding | 112.47298  | -1.6915292 | 0.13272387 | -12.744725 | 3.3357E-37 | 4.6491E-36 |
| LYNX1   | ENSG00000180155 | protein_coding | 831.602029 | -1.1849525 | 0.13117669 | -9.0332554 | 1.6664E-19 | 9.4623E-19 |
| TH      | ENSG00000180176 | protein_coding | 3.34460327 | -2.0426195 | 0.35068687 | -5.8246251 | 5.7241E-09 | 1.5859E-08 |
| SLC9A4  | ENSG00000180251 | protein_coding | 431.013813 | -6.1086497 | 0.41953296 | -14.560595 | 5.002E-48  | 1.0919E-46 |
| PLD5    | ENSG00000180287 | protein_coding | 34.2607505 | -1.7328721 | 0.24019897 | -7.2143192 | 5.4204E-13 | 2.0281E-12 |
| PNPLA1  | ENSG00000180316 | protein_coding | 75.68883   | -2.4846293 | 0.19883563 | -12.495896 | 7.8606E-36 | 1.0281E-34 |
| ALX1    | ENSG00000180318 | protein_coding | 29.6577886 | -3.0819709 | 0.27348936 | -11.26907  | 1.8653E-29 | 1.8062E-28 |
| MEIOC   | ENSG00000180336 | protein_coding | 38.6512681 | -1.6789955 | 0.11447818 | -14.666512 | 1.0564E-48 | 2.375E-47  |
| MTURN   | ENSG00000180354 | protein_coding | 3712.62392 | -3.0530952 | 0.1158558  | -26.352546 | 4.799E-153 | 3.928E-150 |

|          |                 |                |            |            |            |            |            |            |
|----------|-----------------|----------------|------------|------------|------------|------------|------------|------------|
| CYP8B1   | ENSG00000180432 | protein_coding | 661.126873 | -1.4760698 | 0.23769809 | -6.2098515 | 5.3035E-10 | 1.6012E-09 |
| SERTM1   | ENSG00000180440 | protein_coding | 9.28491833 | -1.2444255 | 0.32669789 | -3.8091016 | 0.00013947 | 0.00025855 |
| GAS1     | ENSG00000180447 | protein_coding | 347.697432 | -2.1022985 | 0.16919124 | -12.425576 | 1.8985E-35 | 2.4481E-34 |
| KCNE1    | ENSG00000180509 | protein_coding | 28.0007979 | -1.8231221 | 0.1751085  | -10.411385 | 2.2E-25    | 1.7227E-24 |
| RNF182   | ENSG00000180537 | protein_coding | 150.404155 | -1.2707078 | 0.20101613 | -6.321422  | 2.5917E-10 | 7.9982E-10 |
| TSPYL5   | ENSG00000180543 | protein_coding | 1313.55283 | -1.6164891 | 0.11776682 | -13.726184 | 7.0764E-43 | 1.251E-41  |
| SKIDA1   | ENSG00000180592 | protein_coding | 119.937823 | -1.2728303 | 0.14333923 | -8.879846  | 6.6953E-19 | 3.6748E-18 |
| SLC47A2  | ENSG00000180638 | protein_coding | 563.116117 | -3.9368432 | 0.22417459 | -17.561505 | 4.857E-69  | 2.2513E-67 |
| SHISA2   | ENSG00000180730 | protein_coding | 172.899105 | -2.6414194 | 0.21073444 | -12.53435  | 4.8431E-36 | 6.3981E-35 |
| AGTR2    | ENSG00000180772 | protein_coding | 7.43161741 | -2.6304632 | 0.4988334  | -5.27323   | 1.3404E-07 | 3.3127E-07 |
| MAP3K15  | ENSG00000180815 | protein_coding | 113.157004 | -2.8573892 | 0.22952005 | -12.44941  | 1.4088E-35 | 1.8249E-34 |
| GREM2    | ENSG00000180875 | protein_coding | 52.4092195 | -1.9716695 | 0.31065384 | -6.3468376 | 2.1979E-10 | 6.8122E-10 |
| GPR62    | ENSG00000180929 | protein_coding | 13.287408  | -1.5860224 | 0.18150026 | -8.7384028 | 2.3643E-18 | 1.2543E-17 |
| HIGD1A   | ENSG00000181061 | protein_coding | 2556.58045 | -1.3324083 | 0.12989085 | -10.257907 | 1.0904E-24 | 8.2053E-24 |
| TMEM132C | ENSG00000181234 | protein_coding | 31.7642749 | -2.0383791 | 0.28028978 | -7.2723991 | 3.5316E-13 | 1.3387E-12 |
| SYNE4    | ENSG00000181392 | protein_coding | 111.493726 | -2.1899691 | 0.21944574 | -9.9795469 | 1.8732E-23 | 1.3144E-22 |
| UTS2R    | ENSG00000181408 | protein_coding | 6.93164654 | -4.0886708 | 0.3900251  | -10.483097 | 1.033E-25  | 8.2387E-25 |
| DDN      | ENSG00000181418 | protein_coding | 250.052901 | -6.3697633 | 0.24364211 | -26.143934 | 1.155E-150 | 8.681E-148 |
| EDDM3A   | ENSG00000181562 | protein_coding | 6.75536942 | -4.9282837 | 0.27502859 | -17.919169 | 8.3567E-72 | 4.285E-70  |
| TNFSF15  | ENSG00000181634 | protein_coding | 394.455097 | -1.2535588 | 0.12551558 | -9.9872762 | 1.7328E-23 | 1.2183E-22 |
| PLAG1    | ENSG00000181690 | protein_coding | 142.937158 | -1.6154437 | 0.18576692 | -8.6960785 | 3.4355E-18 | 1.8056E-17 |
| CLDN7    | ENSG00000181885 | protein_coding | 2555.81388 | -1.1565444 | 0.17071648 | -6.7746502 | 1.2471E-11 | 4.2425E-11 |
| PNMA8A   | ENSG00000182013 | protein_coding | 1016.47345 | -1.8678003 | 0.1709027  | -10.929027 | 8.3741E-28 | 7.4467E-27 |
| ADIG     | ENSG00000182035 | protein_coding | 1.5118407  | -1.6187739 | 0.33175107 | -4.8794835 | 1.0636E-06 | 2.4266E-06 |
| MGAT4C   | ENSG00000182050 | protein_coding | 16.9086318 | -2.0007463 | 0.25105103 | -7.9694806 | 1.5934E-15 | 7.0944E-15 |

|          |                 |                |            |            |            |            |            |            |
|----------|-----------------|----------------|------------|------------|------------|------------|------------|------------|
| IDH2     | ENSG00000182054 | protein_coding | 11648.0095 | -1.0892262 | 0.09513689 | -11.449042 | 2.3776E-30 | 2.3946E-29 |
| FAM181B  | ENSG00000182103 | protein_coding | 31.8568121 | -2.2332505 | 0.18038322 | -12.380589 | 3.3289E-35 | 4.2213E-34 |
| TMEM30B  | ENSG00000182107 | protein_coding | 1054.73221 | -2.8217386 | 0.23466607 | -12.024485 | 2.6423E-33 | 3.0696E-32 |
| KCNIP1   | ENSG00000182132 | protein_coding | 95.863953  | -1.3505663 | 0.28621075 | -4.7187825 | 2.3726E-06 | 5.2378E-06 |
| KCNA4    | ENSG00000182255 | protein_coding | 7.58324785 | -2.4922274 | 0.34553564 | -7.2126493 | 5.4874E-13 | 2.0524E-12 |
| GABRG3   | ENSG00000182256 | protein_coding | 11.4294039 | -2.6746991 | 0.27801698 | -9.6206323 | 6.5428E-22 | 4.2429E-21 |
| NLRP10   | ENSG00000182261 | protein_coding | 1.18684671 | -1.7283187 | 0.34987863 | -4.9397665 | 7.8216E-07 | 1.8085E-06 |
| TMIGD1   | ENSG00000182271 | protein_coding | 34.331398  | -1.3930478 | 0.20273344 | -6.8713271 | 6.3607E-12 | 2.2109E-11 |
| GLTPD2   | ENSG00000182327 | protein_coding | 224.097997 | -1.1173674 | 0.17014472 | -6.5671588 | 5.1284E-11 | 1.6691E-10 |
| ZNF804B  | ENSG00000182348 | protein_coding | 21.876423  | -2.864943  | 0.40943262 | -6.997349  | 2.6085E-12 | 9.3244E-12 |
| CACNB4   | ENSG00000182389 | protein_coding | 156.173274 | -1.6056275 | 0.18847206 | -8.5191804 | 1.6069E-17 | 8.1017E-17 |
| GLRX5    | ENSG00000182512 | protein_coding | 1943.38364 | -1.0912144 | 0.08179671 | -13.340567 | 1.3443E-40 | 2.1495E-39 |
| CAV3     | ENSG00000182533 | protein_coding | 1.87693986 | -1.9719703 | 0.28664692 | -6.8794402 | 6.0088E-12 | 2.0915E-11 |
| EPHB3    | ENSG00000182580 | protein_coding | 392.088712 | -1.1054934 | 0.14436686 | -7.6575292 | 1.8954E-14 | 7.837E-14  |
| EPGN     | ENSG00000182585 | protein_coding | 6.73652237 | -4.0283873 | 0.22885668 | -17.602227 | 2.3682E-69 | 1.1089E-67 |
| KCNB2    | ENSG00000182674 | protein_coding | 2.73970497 | -2.5395093 | 0.32353557 | -7.849243  | 4.1856E-15 | 1.8094E-14 |
| RGS6     | ENSG00000182732 | protein_coding | 54.3446911 | -2.3114974 | 0.16777162 | -13.777642 | 3.4744E-43 | 6.2068E-42 |
| PAQR7    | ENSG00000182749 | protein_coding | 1904.04901 | -1.6133284 | 0.07639341 | -21.118687 | 5.356E-99  | 7.6491E-97 |
| PAPPA    | ENSG00000182752 | protein_coding | 667.652841 | -3.1396507 | 0.17907529 | -17.532574 | 8.0827E-69 | 3.7163E-67 |
| MAFA     | ENSG00000182759 | protein_coding | 10.2313111 | -1.8559916 | 0.29100544 | -6.3778589 | 1.7958E-10 | 5.607E-10  |
| C1orf116 | ENSG00000182795 | protein_coding | 495.408359 | -2.8690766 | 0.26658369 | -10.762386 | 5.1811E-27 | 4.4278E-26 |
| PLCXD3   | ENSG00000182836 | protein_coding | 455.89549  | -1.84512   | 0.22018272 | -8.3799492 | 5.2951E-17 | 2.5861E-16 |
| C11orf54 | ENSG00000182919 | protein_coding | 11356.4623 | -1.0951187 | 0.12056431 | -9.0832744 | 1.0536E-19 | 6.0446E-19 |
| CADM1    | ENSG00000182985 | protein_coding | 3000.32888 | -1.3565805 | 0.12171451 | -11.145594 | 7.524E-29  | 7.0649E-28 |
| SLC8A1   | ENSG00000183023 | protein_coding | 2550.33189 | -1.3681822 | 0.12858917 | -10.639949 | 1.9424E-26 | 1.6119E-25 |

|          |                 |                |            |            |            |            |            |            |
|----------|-----------------|----------------|------------|------------|------------|------------|------------|------------|
| PCP4     | ENSG00000183036 | protein_coding | 334.638778 | -2.3593108 | 0.41034536 | -5.7495735 | 8.9469E-09 | 2.4394E-08 |
| ABAT     | ENSG00000183044 | protein_coding | 2705.74196 | -3.0671661 | 0.14775562 | -20.758372 | 1.03E-95   | 1.3152E-93 |
| SLC25A10 | ENSG00000183048 | protein_coding | 823.480735 | -1.0488048 | 0.13356228 | -7.8525528 | 4.0765E-15 | 1.7636E-14 |
| IGSF5    | ENSG00000183067 | protein_coding | 13.3274708 | -2.251036  | 0.22536971 | -9.9881921 | 1.7168E-23 | 1.2075E-22 |
| AFMID    | ENSG00000183077 | protein_coding | 2020.09505 | -1.0917405 | 0.08914895 | -12.246252 | 1.7594E-34 | 2.1582E-33 |
| FREM3    | ENSG00000183090 | protein_coding | 11.2766493 | -1.5016929 | 0.21394224 | -7.0191512 | 2.2322E-12 | 8.0086E-12 |
| FAM43B   | ENSG00000183114 | protein_coding | 69.5655249 | -1.5991219 | 0.18277963 | -8.7489065 | 2.1543E-18 | 1.1458E-17 |
| CSMD1    | ENSG00000183117 | protein_coding | 149.630326 | -1.3293926 | 0.21636204 | -6.1442967 | 8.0319E-10 | 2.3905E-09 |
| RIPPLY3  | ENSG00000183145 | protein_coding | 18.1522685 | -1.339994  | 0.18748379 | -7.1472528 | 8.8532E-13 | 3.2705E-12 |
| CHST6    | ENSG00000183196 | protein_coding | 45.2954969 | -2.6688817 | 0.24025194 | -11.108679 | 1.1383E-28 | 1.0572E-27 |
| PRR36    | ENSG00000183248 | protein_coding | 132.030595 | -1.3965942 | 0.22195868 | -6.292136  | 3.1313E-10 | 9.6129E-10 |
| CCBE1    | ENSG00000183287 | protein_coding | 260.895235 | -1.7165525 | 0.3007942  | -5.7067342 | 1.1516E-08 | 3.1109E-08 |
| OVCH2    | ENSG00000183378 | protein_coding | 77.9478926 | -4.4193822 | 0.30616658 | -14.434567 | 3.1361E-47 | 6.6158E-46 |
| LRIT3    | ENSG00000183423 | protein_coding | 44.510616  | -2.0926973 | 0.16992418 | -12.315477 | 7.4772E-35 | 9.337E-34  |
| URAD     | ENSG00000183463 | protein_coding | 0.54309184 | -1.1525793 | 0.35487189 | -3.2478743 | 0.00116271 | 0.00194901 |
| IZUMO1R  | ENSG00000183560 | protein_coding | 2.64667628 | -1.0815473 | 0.19017126 | -5.6872278 | 1.2912E-08 | 3.4746E-08 |
| PGPEP1L  | ENSG00000183571 | protein_coding | 10.7769884 | -1.1163424 | 0.27709299 | -4.0287645 | 5.6071E-05 | 0.00010833 |
| ZNRF3    | ENSG00000183579 | protein_coding | 24.6845307 | -1.3009847 | 0.13348659 | -9.7461827 | 1.9154E-22 | 1.2725E-21 |
| TAF41    | ENSG00000183662 | protein_coding | 10.9148558 | -1.3614174 | 0.1288531  | -10.565655 | 4.2996E-26 | 3.4959E-25 |
| CMTM4    | ENSG00000183723 | protein_coding | 4721.02388 | -1.8695445 | 0.12542962 | -14.905127 | 3.0523E-50 | 7.3028E-49 |
| KCTD8    | ENSG00000183783 | protein_coding | 14.0804821 | -4.079302  | 0.25633113 | -15.914189 | 5.0518E-57 | 1.5367E-55 |
| EMILIN3  | ENSG00000183798 | protein_coding | 17.4338704 | -1.2473512 | 0.15369519 | -8.1157459 | 4.8281E-16 | 2.2168E-15 |
| ANKRD45  | ENSG00000183831 | protein_coding | 94.5200096 | -1.2912911 | 0.16090625 | -8.0251148 | 1.0143E-15 | 4.5666E-15 |
| FAM3B    | ENSG00000183844 | protein_coding | 254.506146 | -3.8745542 | 0.26440141 | -14.65406  | 1.269E-48  | 2.8418E-47 |
| SRARP    | ENSG00000183888 | protein_coding | 26.8604471 | -2.9518909 | 0.36566132 | -8.0727458 | 6.8735E-16 | 3.1252E-15 |

|            |                 |                |            |            |            |            |            |            |
|------------|-----------------|----------------|------------|------------|------------|------------|------------|------------|
| LRRC55     | ENSG00000183908 | protein_coding | 52.5199997 | -1.2577988 | 0.16132653 | -7.7966023 | 6.3596E-15 | 2.7162E-14 |
| PRKX       | ENSG00000183943 | protein_coding | 2363.99426 | -1.00632   | 0.09406811 | -10.697781 | 1.0425E-26 | 8.7666E-26 |
| ST6GALNAC3 | ENSG00000184005 | protein_coding | 765.201533 | -1.2239374 | 0.12223231 | -10.013207 | 1.3336E-23 | 9.4398E-23 |
| TMPRSS2    | ENSG00000184012 | protein_coding | 1474.20088 | -3.4843064 | 0.34674426 | -10.048635 | 9.3149E-24 | 6.6491E-23 |
| ADRA2C     | ENSG00000184160 | protein_coding | 455.868029 | -1.4393223 | 0.16445988 | -8.7518145 | 2.0995E-18 | 1.117E-17  |
| KCNJ12     | ENSG00000184185 | protein_coding | 186.22632  | -2.3330499 | 0.1487475  | -15.684633 | 1.9267E-55 | 5.5619E-54 |
| PCDH9      | ENSG00000184226 | protein_coding | 321.530759 | -3.2604207 | 0.18955183 | -17.200682 | 2.6242E-66 | 1.0996E-64 |
| ALDH1A3    | ENSG00000184254 | protein_coding | 1022.09609 | -1.3987567 | 0.18246887 | -7.6657278 | 1.7782E-14 | 7.3635E-14 |
| TACSTD2    | ENSG00000184292 | protein_coding | 4646.35693 | -3.4790618 | 0.25480733 | -13.653696 | 1.9189E-42 | 3.317E-41  |
| PRKD1      | ENSG00000184304 | protein_coding | 1381.53063 | -1.0750808 | 0.08266327 | -13.005544 | 1.1379E-38 | 1.6772E-37 |
| CCSER1     | ENSG00000184305 | protein_coding | 195.163416 | -2.4846755 | 0.15626929 | -15.89996  | 6.3405E-57 | 1.9211E-55 |
| GDF3       | ENSG00000184344 | protein_coding | 47.6513605 | -2.1493739 | 0.16558197 | -12.980724 | 1.5739E-38 | 2.3094E-37 |
| ACTRT3     | ENSG00000184378 | protein_coding | 98.9807394 | -1.7752282 | 0.11473155 | -15.472886 | 5.2882E-54 | 1.4533E-52 |
| LRRC19     | ENSG00000184434 | protein_coding | 1271.29421 | -2.0135578 | 0.19386783 | -10.38624  | 2.8642E-25 | 2.2265E-24 |
| NCMAP      | ENSG00000184454 | protein_coding | 100.613363 | -1.995881  | 0.23124302 | -8.6310972 | 6.0766E-18 | 3.1451E-17 |
| KCNH7      | ENSG00000184611 | protein_coding | 6.809466   | -1.239542  | 0.16912902 | -7.3289728 | 2.3192E-13 | 8.9057E-13 |
| RALYL      | ENSG00000184672 | protein_coding | 133.611025 | -5.7437468 | 0.41314501 | -13.902496 | 6.117E-44  | 1.128E-42  |
| H2BC21     | ENSG00000184678 | protein_coding | 953.415136 | -1.199952  | 0.12760999 | -9.4032761 | 5.289E-21  | 3.2562E-20 |
| CLDN6      | ENSG00000184697 | protein_coding | 7.86425415 | -1.7230103 | 0.20252856 | -8.5074926 | 1.7774E-17 | 8.9416E-17 |
| SATL1      | ENSG00000184788 | protein_coding | 1.97258341 | -1.9339257 | 0.22136966 | -8.7361825 | 2.4112E-18 | 1.2781E-17 |
| APOO       | ENSG00000184831 | protein_coding | 755.676796 | -1.1685711 | 0.10721527 | -10.899297 | 1.1615E-27 | 1.0259E-26 |
| DRD1       | ENSG00000184845 | protein_coding | 40.8668454 | -1.0346616 | 0.1988762  | -5.2025409 | 1.9658E-07 | 4.7944E-07 |
| SDR42E1    | ENSG00000184860 | protein_coding | 464.366897 | -1.2761598 | 0.15242543 | -8.3723547 | 5.6478E-17 | 2.7531E-16 |
| SRY        | ENSG00000184895 | protein_coding | 0.39895365 | -1.6238684 | 0.42168249 | -3.8509267 | 0.00011767 | 0.00021992 |
| TCEAL2     | ENSG00000184905 | protein_coding | 142.741027 | -3.1345311 | 0.33173811 | -9.4488121 | 3.427E-21  | 2.1345E-20 |

|         |                 |                |            |            |            |            |            |            |
|---------|-----------------|----------------|------------|------------|------------|------------|------------|------------|
| CLCNKB  | ENSG00000184908 | protein_coding | 3852.23261 | -3.1543177 | 0.39095297 | -8.0682791 | 7.1296E-16 | 3.2391E-15 |
| DMRTC1B | ENSG00000184911 | protein_coding | 0.54025912 | -1.7896657 | 0.25854806 | -6.9219846 | 4.4536E-12 | 1.5639E-11 |
| WT1     | ENSG00000184937 | protein_coding | 381.426392 | -2.5077002 | 0.28017253 | -8.9505569 | 3.5369E-19 | 1.9703E-18 |
| MUC6    | ENSG00000184956 | protein_coding | 79.3853601 | -2.6644675 | 0.2263745  | -11.770176 | 5.5609E-32 | 6.0665E-31 |
| SORCS2  | ENSG00000184985 | protein_coding | 1220.11648 | -1.314815  | 0.23461222 | -5.604205  | 2.0921E-08 | 5.5321E-08 |
| ROBO2   | ENSG00000185008 | protein_coding | 220.791185 | -1.046942  | 0.17663526 | -5.9271404 | 3.0826E-09 | 8.7394E-09 |
| SGCZ    | ENSG00000185053 | protein_coding | 5.0043331  | -4.4624647 | 0.4450212  | -10.027533 | 1.1536E-23 | 8.1939E-23 |
| C5orf47 | ENSG00000185056 | protein_coding | 7.50762047 | -1.8397979 | 0.1833075  | -10.036675 | 1.0516E-23 | 7.4842E-23 |
| FLRT2   | ENSG00000185070 | protein_coding | 407.427953 | -1.1463653 | 0.16829416 | -6.8116763 | 9.6468E-12 | 3.3058E-11 |
| INPP5J  | ENSG00000185133 | protein_coding | 1367.54875 | -1.7148037 | 0.32559785 | -5.266631  | 1.3895E-07 | 3.4297E-07 |
| NPY2R   | ENSG00000185149 | protein_coding | 1.03663773 | -3.7254071 | 0.37381111 | -9.9660147 | 2.1467E-23 | 1.5029E-22 |
| MFSD6L  | ENSG00000185156 | protein_coding | 65.2589288 | -3.3898524 | 0.27058604 | -12.527817 | 5.2591E-36 | 6.9376E-35 |
| MC2R    | ENSG00000185231 | protein_coding | 0.60648139 | -2.9757295 | 0.59089032 | -5.0360098 | 4.7534E-07 | 1.121E-06  |
| PPIL6   | ENSG00000185250 | protein_coding | 274.549275 | -1.0342939 | 0.08661512 | -11.941262 | 7.212E-33  | 8.1996E-32 |
| NOTUM   | ENSG00000185269 | protein_coding | 16.019272  | -2.2069018 | 0.28715359 | -7.6854404 | 1.5247E-14 | 6.3408E-14 |
| KLHL33  | ENSG00000185271 | protein_coding | 10.6118488 | -1.532298  | 0.1555707  | -9.8495279 | 6.8867E-23 | 4.6908E-22 |
| RBM11   | ENSG00000185272 | protein_coding | 38.4949663 | -2.5089277 | 0.24863095 | -10.090971 | 6.0567E-24 | 4.3635E-23 |
| NUPR2   | ENSG00000185290 | protein_coding | 60.9261244 | -2.9317446 | 0.45224053 | -6.482711  | 9.0089E-11 | 2.8795E-10 |
| HS6ST3  | ENSG00000185352 | protein_coding | 140.226556 | -1.4221294 | 0.29056427 | -4.8943712 | 9.8621E-07 | 2.2568E-06 |
| SH3BGR  | ENSG00000185437 | protein_coding | 276.030548 | -1.1620524 | 0.08092968 | -14.358793 | 9.3848E-47 | 1.944E-45  |
| MUC1    | ENSG00000185499 | protein_coding | 7196.5414  | -1.5069772 | 0.1802817  | -8.359014  | 6.3245E-17 | 3.0726E-16 |
| BRCC3   | ENSG00000185515 | protein_coding | 922.733108 | -1.0734555 | 0.0693832  | -15.471404 | 5.4114E-54 | 1.4863E-52 |
| PDE6G   | ENSG00000185527 | protein_coding | 88.1720907 | -1.0698879 | 0.14566672 | -7.3447654 | 2.0612E-13 | 7.9475E-13 |
| DLK1    | ENSG00000185559 | protein_coding | 19.9139195 | -3.0251514 | 0.38679722 | -7.8210267 | 5.2394E-15 | 2.2525E-14 |
| LSAMP   | ENSG00000185565 | protein_coding | 236.559148 | -2.1021891 | 0.33800805 | -6.2193463 | 4.9923E-10 | 1.5107E-09 |



|          |                 |                |            |            |            |            |            |            |
|----------|-----------------|----------------|------------|------------|------------|------------|------------|------------|
| DBX2     | ENSG00000185610 | protein_coding | 1.87873657 | -2.5543559 | 0.25151023 | -10.156072 | 3.1137E-24 | 2.2808E-23 |
| PBX1     | ENSG00000185630 | protein_coding | 3910.96293 | -1.4195054 | 0.12222022 | -11.614325 | 3.4853E-31 | 3.6536E-30 |
| SYN3     | ENSG00000185666 | protein_coding | 45.7969459 | -1.110741  | 0.12559355 | -8.8439337 | 9.2406E-19 | 5.0273E-18 |
| MORN5    | ENSG00000185681 | protein_coding | 22.7247726 | -1.0266904 | 0.19710663 | -5.2088071 | 1.9006E-07 | 4.6427E-07 |
| SRL      | ENSG00000185739 | protein_coding | 167.259057 | -1.8979668 | 0.1204543  | -15.756738 | 6.1739E-56 | 1.8096E-54 |
| PCYT2    | ENSG00000185813 | protein_coding | 1798.41631 | -1.3070374 | 0.11077919 | -11.798583 | 3.9694E-32 | 4.3532E-31 |
| NAT8L    | ENSG00000185818 | protein_coding | 573.401152 | -4.5772284 | 0.27802259 | -16.463513 | 6.7092E-61 | 2.3353E-59 |
| NPAP1    | ENSG00000185823 | protein_coding | 10.2300817 | -2.6121043 | 0.28180239 | -9.2692768 | 1.8741E-20 | 1.1211E-19 |
| NKAIN3   | ENSG00000185942 | protein_coding | 2.50079055 | -1.4471028 | 0.43166316 | -3.3523891 | 0.00080117 | 0.00136642 |
| GRK1     | ENSG00000185974 | protein_coding | 3.01013745 | -1.4801937 | 0.22871785 | -6.4717015 | 9.6905E-11 | 3.0898E-10 |
| ATP4B    | ENSG00000186009 | protein_coding | 10.2042587 | -2.7569232 | 0.27124242 | -10.164056 | 2.8689E-24 | 2.1069E-23 |
| HTR3D    | ENSG00000186090 | protein_coding | 1.0803902  | -2.6808862 | 0.32970416 | -8.131187  | 4.2511E-16 | 1.9585E-15 |
| AGBL4    | ENSG00000186094 | protein_coding | 59.3583724 | -2.4781614 | 0.12614926 | -19.644676 | 6.4205E-86 | 5.5638E-84 |
| CYP4F2   | ENSG00000186115 | protein_coding | 363.502427 | -4.9255293 | 0.35717457 | -13.790258 | 2.9172E-43 | 5.2318E-42 |
| SLC51B   | ENSG00000186198 | protein_coding | 196.95456  | -1.5456344 | 0.1751708  | -8.8235847 | 1.1085E-18 | 5.9995E-18 |
| SOWAHB   | ENSG00000186212 | protein_coding | 609.363328 | -1.3239525 | 0.14854165 | -8.913005  | 4.9668E-19 | 2.7435E-18 |
| NAP1L3   | ENSG00000186310 | protein_coding | 197.235806 | -1.3122481 | 0.14720134 | -8.9146473 | 4.8937E-19 | 2.7054E-18 |
| RGS9BP   | ENSG00000186326 | protein_coding | 14.0877605 | -1.1345077 | 0.17693302 | -6.4120741 | 1.4355E-10 | 4.5159E-10 |
| SLC36A2  | ENSG00000186335 | protein_coding | 688.385837 | -4.6917538 | 0.36669049 | -12.794861 | 1.7517E-37 | 2.4715E-36 |
| TRDN     | ENSG00000186439 | protein_coding | 10.3645676 | -1.9161888 | 0.31646613 | -6.0549571 | 1.4046E-09 | 4.0968E-09 |
| TMPRSS12 | ENSG00000186452 | protein_coding | 3.56848102 | -1.9913362 | 0.26151162 | -7.6147142 | 2.6428E-14 | 1.082E-13  |
| DEFB132  | ENSG00000186458 | protein_coding | 4.70558818 | -3.7653803 | 0.66835156 | -5.6338319 | 1.7625E-08 | 4.693E-08  |
| NAP1L2   | ENSG00000186462 | protein_coding | 351.918934 | -2.2408251 | 0.189685   | -11.813402 | 3.3282E-32 | 3.6701E-31 |
| C5orf38  | ENSG00000186493 | protein_coding | 90.0730659 | -2.5635396 | 0.26008697 | -9.8564706 | 6.4269E-23 | 4.3809E-22 |
| CLCNKA   | ENSG00000186510 | protein_coding | 2070.37279 | -4.9303223 | 0.33485216 | -14.723878 | 4.5292E-49 | 1.0324E-47 |

|           |                 |                |            |            |            |            |            |            |
|-----------|-----------------|----------------|------------|------------|------------|------------|------------|------------|
| CYP4F3    | ENSG00000186529 | protein_coding | 647.479727 | -2.1745359 | 0.28178229 | -7.7170778 | 1.1903E-14 | 4.9902E-14 |
| HPDL      | ENSG00000186603 | protein_coding | 20.1308939 | -1.0045544 | 0.13002444 | -7.7258888 | 1.1108E-14 | 4.6692E-14 |
| MAGEE2    | ENSG00000186675 | protein_coding | 5.22961729 | -2.7390926 | 0.19544035 | -14.01498  | 1.2623E-44 | 2.3912E-43 |
| CFAP73    | ENSG00000186710 | protein_coding | 20.4833685 | -1.4578449 | 0.15220737 | -9.5780176 | 9.8925E-22 | 6.3522E-21 |
| FOXE3     | ENSG00000186790 | protein_coding | 2.36031568 | -2.105352  | 0.21100384 | -9.9777902 | 1.9067E-23 | 1.3373E-22 |
| KRTAP17-1 | ENSG00000186860 | protein_coding | 1.16270897 | -2.1922273 | 0.31380975 | -6.9858483 | 2.8314E-12 | 1.009E-11  |
| PPARA     | ENSG00000186951 | protein_coding | 3654.75288 | -1.0664247 | 0.07669817 | -13.904174 | 5.9753E-44 | 1.1032E-42 |
| CYP4A11   | ENSG00000187048 | protein_coding | 5798.68362 | -1.6739943 | 0.3024391  | -5.5349796 | 3.1126E-08 | 8.1119E-08 |
| CCK       | ENSG00000187094 | protein_coding | 1.57327514 | -2.7184624 | 0.2930072  | -9.2778006 | 1.7301E-20 | 1.0377E-19 |
| LYPD6     | ENSG00000187123 | protein_coding | 88.9675804 | -2.654599  | 0.23305251 | -11.390562 | 4.6598E-30 | 4.6216E-29 |
| AKR1C1    | ENSG00000187134 | protein_coding | 2295.55053 | -1.0433275 | 0.18384524 | -5.6750312 | 1.3866E-08 | 3.7233E-08 |
| FOXD3     | ENSG00000187140 | protein_coding | 1.43815887 | -2.2291537 | 0.39231013 | -5.6821211 | 1.3303E-08 | 3.5774E-08 |
| TSPYL4    | ENSG00000187189 | protein_coding | 2123.11044 | -1.0661039 | 0.06714008 | -15.8788   | 8.8862E-57 | 2.6817E-55 |
| LCE2D     | ENSG00000187223 | protein_coding | 0.37783789 | -3.5512945 | 0.62851269 | -5.6503146 | 1.6015E-08 | 4.2793E-08 |
| BCAM      | ENSG00000187244 | protein_coding | 17145.7138 | -1.6860502 | 0.1090171  | -15.465924 | 5.8921E-54 | 1.6174E-52 |
| MAGI2     | ENSG00000187391 | protein_coding | 700.325405 | -1.6081911 | 0.09130865 | -17.612691 | 1.9686E-69 | 9.2461E-68 |
| LHFPL3    | ENSG00000187416 | protein_coding | 36.3854386 | -1.4469421 | 0.19379927 | -7.46619   | 8.255E-14  | 3.2744E-13 |
| PLEKHG7   | ENSG00000187510 | protein_coding | 20.140485  | -1.4626693 | 0.15680948 | -9.3276841 | 1.0821E-20 | 6.5588E-20 |
| ATP13A5   | ENSG00000187527 | protein_coding | 10.5764244 | -1.4675252 | 0.2600643  | -5.6429321 | 1.6718E-08 | 4.4616E-08 |
| TLR5      | ENSG00000187554 | protein_coding | 577.560666 | -1.1832024 | 0.10063137 | -11.757789 | 6.4399E-32 | 6.9972E-31 |
| MYMK      | ENSG00000187616 | protein_coding | 5.73576197 | -3.2333568 | 0.28044583 | -11.529345 | 9.3855E-31 | 9.6057E-30 |
| C5orf52   | ENSG00000187658 | protein_coding | 0.49448144 | -1.2800155 | 0.27988345 | -4.5733875 | 4.799E-06  | 1.0304E-05 |
| ERC2      | ENSG00000187672 | protein_coding | 36.6952694 | -1.6346659 | 0.19710959 | -8.2931829 | 1.1026E-16 | 5.2809E-16 |
| THSD4     | ENSG00000187720 | protein_coding | 1665.13657 | -1.9320129 | 0.15194984 | -12.714807 | 4.8932E-37 | 6.7667E-36 |
| ADH1A     | ENSG00000187758 | protein_coding | 4.12112061 | -1.7680131 | 0.22285425 | -7.9334951 | 2.1306E-15 | 9.4004E-15 |

|          |                 |                |            |            |            |            |            |            |
|----------|-----------------|----------------|------------|------------|------------|------------|------------|------------|
| TMEM72   | ENSG00000187783 | protein_coding | 2572.60481 | -3.0253744 | 0.20302347 | -14.9016   | 3.2178E-50 | 7.6867E-49 |
| HELT     | ENSG00000187821 | protein_coding | 4.70327779 | -5.5370022 | 0.34608318 | -15.99905  | 1.2974E-57 | 4.0513E-56 |
| RTL4     | ENSG00000187823 | protein_coding | 16.481771  | -2.4801163 | 0.22773922 | -10.890159 | 1.2842E-27 | 1.1312E-26 |
| P2RX2    | ENSG00000187848 | protein_coding | 3.36668805 | -3.5825501 | 0.25858423 | -13.85448  | 1.1952E-43 | 2.1837E-42 |
| PALM3    | ENSG00000187867 | protein_coding | 817.254975 | -1.853272  | 0.16918146 | -10.954345 | 6.3335E-28 | 5.6662E-27 |
| FYB2     | ENSG00000187889 | protein_coding | 211.272165 | -2.0843251 | 0.26011263 | -8.0131637 | 1.1179E-15 | 5.0189E-15 |
| COL14A1  | ENSG00000187955 | protein_coding | 3929.55616 | -1.2222634 | 0.17177645 | -7.1154307 | 1.1156E-12 | 4.093E-12  |
| DNER     | ENSG00000187957 | protein_coding | 597.773596 | -2.513503  | 0.31018581 | -8.1032174 | 5.3524E-16 | 2.4499E-15 |
| CLCN1    | ENSG00000188037 | protein_coding | 11.1286025 | -1.8273962 | 0.16298985 | -11.211718 | 3.5719E-29 | 3.4155E-28 |
| WNT7B    | ENSG00000188064 | protein_coding | 198.689538 | -3.8363704 | 0.32453409 | -11.821163 | 3.0345E-32 | 3.3544E-31 |
| SCGB1C1  | ENSG00000188076 | protein_coding | 0.72793619 | -1.7942151 | 0.37942976 | -4.7287146 | 2.2595E-06 | 5.0005E-06 |
| C6orf132 | ENSG00000188112 | protein_coding | 518.009888 | -1.4498026 | 0.1526426  | -9.4980213 | 2.1392E-21 | 1.3487E-20 |
| COL4A5   | ENSG00000188153 | protein_coding | 924.691774 | -2.3153828 | 0.15955218 | -14.511759 | 1.0207E-47 | 2.1946E-46 |
| TMPPE    | ENSG00000188167 | protein_coding | 128.268905 | -1.0028691 | 0.12062421 | -8.3139951 | 9.2533E-17 | 4.4501E-16 |
| HEPACAM2 | ENSG00000188175 | protein_coding | 823.590907 | -1.166621  | 0.51221019 | -2.2776216 | 0.02274913 | 0.03237738 |
| SMTNL2   | ENSG00000188176 | protein_coding | 1140.3486  | -1.2302302 | 0.15736626 | -7.8176235 | 5.383E-15  | 2.3116E-14 |
| HYKK     | ENSG00000188266 | protein_coding | 208.587217 | -2.0223661 | 0.08035391 | -25.168235 | 8.926E-140 | 4.353E-137 |
| SBK1     | ENSG00000188322 | protein_coding | 182.00888  | -1.4543861 | 0.13145486 | -11.063768 | 1.8803E-28 | 1.7246E-27 |
| SLC38A3  | ENSG00000188338 | protein_coding | 81.3472161 | -2.9480437 | 0.29046407 | -10.149426 | 3.3332E-24 | 2.4377E-23 |
| INSC     | ENSG00000188487 | protein_coding | 15.1738855 | -1.8060931 | 0.18576957 | -9.7222228 | 2.4243E-22 | 1.6041E-21 |
| SERPINA5 | ENSG00000188488 | protein_coding | 3070.931   | -4.8851226 | 0.27857802 | -17.535922 | 7.6203E-69 | 3.5073E-67 |
| NCCRP1   | ENSG00000188505 | protein_coding | 47.4308575 | -2.956962  | 0.20235843 | -14.612498 | 2.3379E-48 | 5.1798E-47 |
| CFAP77   | ENSG00000188523 | protein_coding | 4.40064676 | -1.7003093 | 0.18625464 | -9.1289501 | 6.9167E-20 | 4.0171E-19 |
| NKAIN2   | ENSG00000188580 | protein_coding | 13.2685723 | -1.9539697 | 0.22888304 | -8.5369791 | 1.3778E-17 | 6.9773E-17 |
| NANOS1   | ENSG00000188613 | protein_coding | 133.051595 | -1.6042026 | 0.12383239 | -12.954628 | 2.212E-38  | 3.2201E-37 |

|          |                 |                |            |            |            |            |            |            |
|----------|-----------------|----------------|------------|------------|------------|------------|------------|------------|
| HMX3     | ENSG00000188620 | protein_coding | 0.85634669 | -2.5323676 | 0.39167275 | -6.4655191 | 1.0095E-10 | 3.2159E-10 |
| SAXO2    | ENSG00000188659 | protein_coding | 54.8091533 | -1.0381167 | 0.11850449 | -8.7601469 | 1.95E-18   | 1.0407E-17 |
| BCL2L15  | ENSG00000188761 | protein_coding | 86.1521192 | -1.9148849 | 0.19326751 | -9.9079505 | 3.8445E-23 | 2.6534E-22 |
| PRELP    | ENSG00000188783 | protein_coding | 3068.85517 | -1.0030933 | 0.20495348 | -4.8942487 | 9.8682E-07 | 2.2581E-06 |
| SHISA6   | ENSG00000188803 | protein_coding | 159.939543 | -1.6766984 | 0.20045215 | -8.3645819 | 6.0328E-17 | 2.9345E-16 |
| HMX2     | ENSG00000188816 | protein_coding | 9.58876226 | -5.4378559 | 0.59864996 | -9.0835317 | 1.0511E-19 | 6.0311E-19 |
| SNTN     | ENSG00000188817 | protein_coding | 0.76916675 | -1.920302  | 0.44373863 | -4.327552  | 1.5078E-05 | 3.0845E-05 |
| ENTPD8   | ENSG00000188833 | protein_coding | 91.0299872 | -1.7294475 | 0.18555814 | -9.3202456 | 1.1607E-20 | 7.026E-20  |
| KLRG2    | ENSG00000188883 | protein_coding | 101.682293 | -5.0658912 | 0.30459885 | -16.631354 | 4.1315E-62 | 1.4925E-60 |
| GJB3     | ENSG00000188910 | protein_coding | 38.2002502 | -1.0394835 | 0.28854738 | -3.6024709 | 0.00031521 | 0.00056182 |
| C9orf152 | ENSG00000188959 | protein_coding | 12.1431347 | -1.7903884 | 0.21268503 | -8.4180275 | 3.8288E-17 | 1.8866E-16 |
| NDUFA4   | ENSG00000189043 | protein_coding | 7657.23727 | -1.0117454 | 0.10652679 | -9.4975681 | 2.1485E-21 | 1.3544E-20 |
| RELN     | ENSG00000189056 | protein_coding | 430.579011 | -1.0949359 | 0.25856181 | -4.2347162 | 2.2884E-05 | 4.6024E-05 |
| APOD     | ENSG00000189058 | protein_coding | 608.781128 | -1.446765  | 0.1939772  | -7.458428  | 8.7561E-14 | 3.4659E-13 |
| H1-0     | ENSG00000189060 | protein_coding | 8612.20238 | -1.9029603 | 0.10928897 | -17.412191 | 6.6683E-68 | 2.9678E-66 |
| ANKRD34B | ENSG00000189127 | protein_coding | 19.6098171 | -3.9297781 | 0.2800471  | -14.032561 | 9.8528E-45 | 1.871E-43  |
| NKAPL    | ENSG00000189134 | protein_coding | 48.9580727 | -1.0842032 | 0.11352558 | -9.5502988 | 1.2932E-21 | 8.2429E-21 |
| CLDN4    | ENSG00000189143 | protein_coding | 6828.31206 | -1.1968122 | 0.13670697 | -8.7545804 | 2.0486E-18 | 1.0911E-17 |
| NUGGC    | ENSG00000189233 | protein_coding | 231.794589 | -1.3368001 | 0.20950726 | -6.3806862 | 1.763E-10  | 5.5092E-10 |
| TSPYL1   | ENSG00000189241 | protein_coding | 7981.10319 | -1.021979  | 0.07681443 | -13.304519 | 2.1789E-40 | 3.4562E-39 |
| FAM180A  | ENSG00000189320 | protein_coding | 84.8234654 | -2.3251165 | 0.21860251 | -10.636275 | 2.0205E-26 | 1.6736E-25 |
| S100A14  | ENSG00000189334 | protein_coding | 307.164881 | -2.0814193 | 0.18686751 | -11.138476 | 8.1502E-29 | 7.645E-28  |
| KAZN     | ENSG00000189337 | protein_coding | 1904.9294  | -1.0987138 | 0.08120934 | -13.529403 | 1.0487E-41 | 1.752E-40  |
| ALG1L    | ENSG00000189366 | protein_coding | 21.55608   | -1.0189337 | 0.18243967 | -5.5850445 | 2.3364E-08 | 6.1511E-08 |
| RASSF10  | ENSG00000189431 | protein_coding | 115.558228 | -3.1028722 | 0.21331166 | -14.546191 | 6.1747E-48 | 1.3421E-46 |

|        |                 |                |            |            |            |            |            |            |
|--------|-----------------|----------------|------------|------------|------------|------------|------------|------------|
| PTPRT  | ENSG00000196090 | protein_coding | 28.0889587 | -1.5752921 | 0.24943305 | -6.3154907 | 2.6931E-10 | 8.301E-10  |
| SPOCK3 | ENSG00000196104 | protein_coding | 8.67933643 | -1.8740834 | 0.28515772 | -6.5720943 | 4.9612E-11 | 1.6171E-10 |
| ZNF676 | ENSG00000196109 | protein_coding | 68.5198288 | -1.1407216 | 0.28457714 | -4.0084793 | 6.1111E-05 | 0.00011757 |
| VN1R2  | ENSG00000196131 | protein_coding | 0.5008242  | -1.3046341 | 0.26502743 | -4.9226381 | 8.5385E-07 | 1.9673E-06 |
| ACADSB | ENSG00000196177 | protein_coding | 3967.64123 | -2.0274276 | 0.10234591 | -19.809562 | 2.4622E-87 | 2.235E-85  |
| SEMA4A | ENSG00000196189 | protein_coding | 1431.4674  | -1.5700236 | 0.12577062 | -12.483229 | 9.2171E-36 | 1.2021E-34 |
| SRGAP3 | ENSG00000196220 | protein_coding | 487.975104 | -2.4579039 | 0.11613303 | -21.164554 | 2.027E-99  | 2.9124E-97 |
| OR2C3  | ENSG00000196242 | protein_coding | 1.33504107 | -1.7347177 | 0.28168958 | -6.1582602 | 7.3548E-10 | 2.1966E-09 |
| SFTA2  | ENSG00000196260 | protein_coding | 31.3689817 | -2.4544472 | 0.3259324  | -7.5305406 | 5.0531E-14 | 2.0333E-13 |
| NLGN3  | ENSG00000196338 | protein_coding | 70.1639979 | -1.2862808 | 0.11648887 | -11.042091 | 2.394E-28  | 2.1865E-27 |
| ZNF729 | ENSG00000196350 | protein_coding | 2.3382863  | -1.4966581 | 0.30973375 | -4.8320796 | 1.3511E-06 | 3.0532E-06 |
| CPNE4  | ENSG00000196353 | protein_coding | 30.8003454 | -2.6211039 | 0.27512216 | -9.527055  | 1.6181E-21 | 1.0264E-20 |
| S100A5 | ENSG00000196420 | protein_coding | 16.4392691 | -1.7533173 | 0.18504466 | -9.4751036 | 2.665E-21  | 1.6714E-20 |
| ESRRG  | ENSG00000196482 | protein_coding | 1417.0584  | -3.0698674 | 0.20046377 | -15.313826 | 6.1818E-53 | 1.6409E-51 |
| SPTSSB | ENSG00000196542 | protein_coding | 34.9409106 | -3.496117  | 0.23692503 | -14.756216 | 2.8059E-49 | 6.4538E-48 |
| MME    | ENSG00000196549 | protein_coding | 9813.98951 | -1.7848158 | 0.18195807 | -9.80894   | 1.0305E-22 | 6.962E-22  |
| LAMA2  | ENSG00000196569 | protein_coding | 727.613405 | -1.5260406 | 0.17709575 | -8.6170372 | 6.8709E-18 | 3.5433E-17 |
| PFN3   | ENSG00000196570 | protein_coding | 1.60944501 | -2.3182303 | 0.47004763 | -4.931905  | 8.1432E-07 | 1.8797E-06 |
| AJAP1  | ENSG00000196581 | protein_coding | 734.498989 | -1.188137  | 0.16993788 | -6.991596  | 2.7178E-12 | 9.6953E-12 |
| MYO6   | ENSG00000196586 | protein_coding | 6840.46682 | -1.2472857 | 0.07496156 | -16.639004 | 3.6362E-62 | 1.3177E-60 |
| ADH1B  | ENSG00000196616 | protein_coding | 2002.58699 | -2.5969406 | 0.26293335 | -9.8768019 | 5.2481E-23 | 3.5939E-22 |
| WNK3   | ENSG00000196632 | protein_coding | 212.690366 | -1.536934  | 0.17891949 | -8.5900872 | 8.6903E-18 | 4.4521E-17 |
| S100A2 | ENSG00000196754 | protein_coding | 809.053185 | -3.4670836 | 0.21153353 | -16.390232 | 2.2459E-60 | 7.7176E-59 |
| POU3F4 | ENSG00000196767 | protein_coding | 54.3449723 | -2.2741714 | 0.65654961 | -3.4638227 | 0.00053256 | 0.00092631 |
| HCAR1  | ENSG00000196917 | protein_coding | 154.652118 | -1.5225823 | 0.23246265 | -6.5497931 | 5.7617E-11 | 1.8671E-10 |

|           |                 |                |            |            |            |            |            |            |
|-----------|-----------------|----------------|------------|------------|------------|------------|------------|------------|
| SMIM10L2B | ENSG00000196972 | protein_coding | 208.025763 | -1.4770983 | 0.14774532 | -9.997598  | 1.5614E-23 | 1.1012E-22 |
| LCE1C     | ENSG00000197084 | protein_coding | 2.07090759 | -1.9644268 | 0.47155986 | -4.1658058 | 3.1025E-05 | 6.1579E-05 |
| SLC6A17   | ENSG00000197106 | protein_coding | 129.18909  | -2.7525238 | 0.19820248 | -13.887434 | 7.5492E-44 | 1.3876E-42 |
| ADGRA1    | ENSG00000197177 | protein_coding | 12.3349069 | -2.4497449 | 0.41541999 | -5.8970318 | 3.701E-09  | 1.0424E-08 |
| ZNF165    | ENSG00000197279 | protein_coding | 151.271012 | -1.0155391 | 0.10268942 | -9.8894221 | 4.6269E-23 | 3.1819E-22 |
| ZNF98     | ENSG00000197360 | protein_coding | 28.4624397 | -2.1228127 | 0.24325382 | -8.7267395 | 2.6212E-18 | 1.3869E-17 |
| CYP2B6    | ENSG00000197408 | protein_coding | 160.193073 | -4.4968571 | 0.35337095 | -12.725599 | 4.2619E-37 | 5.9167E-36 |
| VEPH1     | ENSG00000197415 | protein_coding | 1831.23614 | -1.4836708 | 0.11922376 | -12.444422 | 1.4997E-35 | 1.9403E-34 |
| OGDHL     | ENSG00000197444 | protein_coding | 7714.48586 | -1.9204782 | 0.21057699 | -9.1200765 | 7.5071E-20 | 4.3512E-19 |
| COL4A6    | ENSG00000197565 | protein_coding | 218.537308 | -4.3747594 | 0.24231122 | -18.0543   | 7.2982E-73 | 3.9084E-71 |
| KCNMB2    | ENSG00000197584 | protein_coding | 77.0719683 | -2.0849597 | 0.23766968 | -8.7725104 | 1.7473E-18 | 9.3527E-18 |
| ENPP1     | ENSG00000197594 | protein_coding | 744.216081 | -1.0828839 | 0.14767512 | -7.3328801 | 2.2526E-13 | 8.6599E-13 |
| MYH6      | ENSG00000197616 | protein_coding | 1.55915804 | -1.3028423 | 0.28710452 | -4.5378675 | 5.6826E-06 | 1.2112E-05 |
| DNAH10    | ENSG00000197653 | protein_coding | 105.021491 | -1.0379209 | 0.11060937 | -9.383662  | 6.372E-21  | 3.9056E-20 |
| KLHL14    | ENSG00000197705 | protein_coding | 260.625962 | -3.8339317 | 0.17327572 | -22.126191 | 1.769E-108 | 3.541E-106 |
| OCLN      | ENSG00000197822 | protein_coding | 645.01613  | -2.0682075 | 0.17360595 | -11.913229 | 1.0099E-32 | 1.1386E-31 |
| ZNF44     | ENSG00000197857 | protein_coding | 1114.07808 | -1.3298115 | 0.07414735 | -17.934713 | 6.3189E-72 | 3.2657E-70 |
| ADAMTSL2  | ENSG00000197859 | protein_coding | 1253.11973 | -1.3215822 | 0.13148583 | -10.051138 | 9.0812E-24 | 6.4914E-23 |
| MEIG1     | ENSG00000197889 | protein_coding | 5.90369653 | -1.2771691 | 0.12092164 | -10.561957 | 4.4724E-26 | 3.6345E-25 |
| SLC22A12  | ENSG00000197891 | protein_coding | 4223.52156 | -2.0573421 | 0.30046128 | -6.8472786 | 7.5268E-12 | 2.6015E-11 |
| KIF13B    | ENSG00000197892 | protein_coding | 4638.35727 | -1.3194365 | 0.11410477 | -11.563377 | 6.3174E-31 | 6.5231E-30 |
| SLC22A6   | ENSG00000197901 | protein_coding | 3170.63286 | -2.9242387 | 0.32700273 | -8.9425514 | 3.8029E-19 | 2.1131E-18 |
| DNM3      | ENSG00000197959 | protein_coding | 468.664495 | -1.212682  | 0.09745506 | -12.4435   | 1.5171E-35 | 1.9623E-34 |
| DLGAP2    | ENSG00000198010 | protein_coding | 34.9778022 | -2.6546303 | 0.21882895 | -12.131074 | 7.2295E-34 | 8.6349E-33 |
| HIBCH     | ENSG00000198130 | protein_coding | 2659.88369 | -1.2748679 | 0.0932092  | -13.677489 | 1.3839E-42 | 2.4112E-41 |



|         |                 |                |            |            |            |            |            |            |
|---------|-----------------|----------------|------------|------------|------------|------------|------------|------------|
| HMGN5   | ENSG00000198157 | protein_coding | 433.890721 | -1.0979037 | 0.07937658 | -13.831583 | 1.6436E-43 | 2.9864E-42 |
| TMEM116 | ENSG00000198270 | protein_coding | 1060.74957 | -1.1290474 | 0.13188923 | -8.5605733 | 1.1231E-17 | 5.7146E-17 |
| PEG3    | ENSG00000198300 | protein_coding | 446.552869 | -2.3604833 | 0.13643864 | -17.300696 | 4.6474E-67 | 2.0061E-65 |
| TMEM207 | ENSG00000198398 | protein_coding | 108.653007 | -8.2058902 | 0.55377627 | -14.81806  | 1.1197E-49 | 2.6175E-48 |
| NTRK1   | ENSG00000198400 | protein_coding | 34.168945  | -1.2989724 | 0.17147892 | -7.5751141 | 3.5881E-14 | 1.4568E-13 |
| MT1F    | ENSG00000198417 | protein_coding | 1732.75739 | -2.1674474 | 0.18685306 | -11.599743 | 4.1332E-31 | 4.314E-30  |
| CNGA1   | ENSG00000198515 | protein_coding | 174.694923 | -2.496254  | 0.18610191 | -13.413371 | 5.0491E-41 | 8.2222E-40 |
| SLC34A3 | ENSG00000198569 | protein_coding | 217.543616 | -3.4278474 | 0.24157888 | -14.18935  | 1.0664E-45 | 2.1181E-44 |
| ARC     | ENSG00000198576 | protein_coding | 222.096565 | -2.1044482 | 0.17985572 | -11.700757 | 1.2632E-31 | 1.3552E-30 |
| LRBA    | ENSG00000198589 | protein_coding | 5849.01258 | -1.1924697 | 0.081657   | -14.603399 | 2.6719E-48 | 5.9027E-47 |
| LPA     | ENSG00000198670 | protein_coding | 20.5313903 | -2.1835753 | 0.28751485 | -7.5946522 | 3.0862E-14 | 1.258E-13  |
| ABCA4   | ENSG00000198691 | protein_coding | 398.148889 | -4.6274351 | 0.23603862 | -19.604568 | 1.4135E-85 | 1.2021E-83 |
| ECI2    | ENSG00000198721 | protein_coding | 4413.34881 | -1.0757327 | 0.07204919 | -14.930532 | 2.086E-50  | 5.0301E-49 |
| SLC5A3  | ENSG00000198743 | protein_coding | 8889.96886 | -1.9073782 | 0.15000157 | -12.715722 | 4.8362E-37 | 6.6917E-36 |
| RASSF9  | ENSG00000198774 | protein_coding | 339.648177 | -1.440068  | 0.14724866 | -9.7798371 | 1.3743E-22 | 9.2267E-22 |
| FAM169A | ENSG00000198780 | protein_coding | 225.825163 | -3.0829865 | 0.2342025  | -13.163764 | 1.4184E-39 | 2.1812E-38 |
| MTOR    | ENSG00000198793 | protein_coding | 3354.89795 | -1.1799852 | 0.05348672 | -22.061272 | 7.446E-108 | 1.465E-105 |
| PNP     | ENSG00000198805 | protein_coding | 4583.49358 | -1.4841508 | 0.07474523 | -19.856127 | 9.755E-88  | 9.0157E-86 |
| GK      | ENSG00000198814 | protein_coding | 1393.40224 | -1.5132601 | 0.12357156 | -12.246022 | 1.7644E-34 | 2.1638E-33 |
| SUCNR1  | ENSG00000198829 | protein_coding | 1351.34994 | -2.1600483 | 0.17593751 | -12.277361 | 1.1984E-34 | 1.4832E-33 |
| TOX     | ENSG00000198846 | protein_coding | 536.285973 | -1.23684   | 0.16705344 | -7.4038582 | 1.3228E-13 | 5.1736E-13 |
| PRMT6   | ENSG00000198890 | protein_coding | 1035.4483  | -1.2942837 | 0.06244314 | -20.727395 | 1.9612E-95 | 2.4564E-93 |
| BHLHB9  | ENSG00000198908 | protein_coding | 410.313367 | -1.0826844 | 0.07385303 | -14.659987 | 1.1629E-48 | 2.6133E-47 |
| L1CAM   | ENSG00000198910 | protein_coding | 1995.3107  | -3.1520122 | 0.29733169 | -10.600996 | 2.9482E-26 | 2.4168E-25 |
| SREBF2  | ENSG00000198911 | protein_coding | 6083.49937 | -1.2565977 | 0.07145112 | -17.586816 | 3.1086E-69 | 1.4497E-67 |

|          |                 |                |            |            |            |            |            |            |
|----------|-----------------|----------------|------------|------------|------------|------------|------------|------------|
| NOS1AP   | ENSG00000198929 | protein_coding | 84.2036283 | -2.7880034 | 0.15496286 | -17.991429 | 2.2742E-72 | 1.1901E-70 |
| SOWAHA   | ENSG00000198944 | protein_coding | 222.620543 | -3.0746431 | 0.24609334 | -12.493809 | 8.0696E-36 | 1.0542E-34 |
| MFAP3L   | ENSG00000198948 | protein_coding | 3308.25975 | -1.7111578 | 0.12110652 | -14.129361 | 2.5041E-45 | 4.8805E-44 |
| RORB     | ENSG00000198963 | protein_coding | 46.4164495 | -2.2060821 | 0.27146105 | -8.1266984 | 4.4114E-16 | 2.031E-15  |
| STUM     | ENSG00000203685 | protein_coding | 777.57709  | -1.1079721 | 0.22775175 | -4.8648237 | 1.1456E-06 | 2.6056E-06 |
| CAPN8    | ENSG00000203697 | protein_coding | 69.3390817 | -1.810255  | 0.29022464 | -6.2374272 | 4.4483E-10 | 1.3519E-09 |
| CR1      | ENSG00000203710 | protein_coding | 257.809415 | -2.0005431 | 0.1913415  | -10.455354 | 1.3848E-25 | 1.0954E-24 |
| OR6K3    | ENSG00000203757 | protein_coding | 0.2561116  | -1.2851054 | 0.50671323 | -2.5361592 | 0.01120758 | 0.0166564  |
| PLPP4    | ENSG00000203805 | protein_coding | 112.842532 | -2.4801265 | 0.25338498 | -9.7879775 | 1.2681E-22 | 8.5284E-22 |
| SAMD13   | ENSG00000203943 | protein_coding | 49.352886  | -1.4790336 | 0.11949369 | -12.377504 | 3.4594E-35 | 4.3831E-34 |
| CCDC160  | ENSG00000203952 | protein_coding | 143.891732 | -2.3891231 | 0.15937847 | -14.99025  | 8.5032E-51 | 2.08E-49   |
| C1orf141 | ENSG00000203963 | protein_coding | 1.22011314 | -1.8786153 | 0.26178741 | -7.1761101 | 7.1723E-13 | 2.6657E-12 |
| LDLRAD1  | ENSG00000203985 | protein_coding | 1.69821791 | -1.8139206 | 0.38598285 | -4.6994849 | 2.6082E-06 | 5.7385E-06 |
| ZYG11A   | ENSG00000203995 | protein_coding | 83.0259098 | -1.3106741 | 0.21311316 | -6.150132  | 7.7418E-10 | 2.3077E-09 |
| TRPC5OS  | ENSG00000204025 | protein_coding | 11.8683772 | -1.3228705 | 0.19065357 | -6.9386088 | 3.9598E-12 | 1.3961E-11 |
| TCEAL5   | ENSG00000204065 | protein_coding | 6.17495258 | -1.1751257 | 0.37758148 | -3.112244  | 0.00185671 | 0.00303987 |
| TCEAL6   | ENSG00000204071 | protein_coding | 3.99100155 | -3.1974713 | 0.28982698 | -11.032345 | 2.6681E-28 | 2.4307E-27 |
| NEU4     | ENSG00000204099 | protein_coding | 61.8208666 | -1.7627842 | 0.2468856  | -7.140085  | 9.3273E-13 | 3.4404E-12 |
| SMIM5    | ENSG00000204323 | protein_coding | 509.956647 | -3.1309933 | 0.24978486 | -12.53476  | 4.8182E-36 | 6.3688E-35 |
| SLC44A4  | ENSG00000204385 | protein_coding | 2048.23882 | -1.9261337 | 0.20193573 | -9.5383502 | 1.4512E-21 | 9.232E-21  |
| VWA7     | ENSG00000204396 | protein_coding | 419.678132 | -1.5919477 | 0.11613254 | -13.708025 | 9.0899E-43 | 1.599E-41  |
| APOM     | ENSG00000204444 | protein_coding | 1914.05389 | -1.2900879 | 0.18479933 | -6.9810206 | 2.9304E-12 | 1.0429E-11 |
| MCCD1    | ENSG00000204511 | protein_coding | 204.567184 | -4.2662644 | 0.37656164 | -11.329525 | 9.3712E-30 | 9.185E-29  |
| AADACL4  | ENSG00000204518 | protein_coding | 2.1744302  | -2.7119426 | 0.27395585 | -9.8991955 | 4.1964E-23 | 2.891E-22  |
| TRIM40   | ENSG00000204614 | protein_coding | 2.1382346  | -2.0414642 | 0.27819395 | -7.3382769 | 2.1636E-13 | 8.329E-13  |

|          |                 |                |            |            |            |            |            |            |
|----------|-----------------|----------------|------------|------------|------------|------------|------------|------------|
| ASPDH    | ENSG00000204653 | protein_coding | 319.736703 | -2.7555694 | 0.21181824 | -13.009122 | 1.0858E-38 | 1.6025E-37 |
| SPDYC    | ENSG00000204710 | protein_coding | 2.26715866 | -2.1077054 | 0.26462786 | -7.9647903 | 1.655E-15  | 7.3573E-15 |
| C9orf135 | ENSG00000204711 | protein_coding | 14.5760115 | -3.4947523 | 0.26739043 | -13.069848 | 4.8963E-39 | 7.3591E-38 |
| MALRD1   | ENSG00000204740 | protein_coding | 39.1683061 | -1.8799914 | 0.23050113 | -8.1561048 | 3.46E-16   | 1.6023E-15 |
| KRT40    | ENSG00000204889 | protein_coding | 4.0910011  | -3.2913537 | 0.30831225 | -10.675391 | 1.327E-26  | 1.1108E-25 |
| ZNF425   | ENSG00000204947 | protein_coding | 165.476142 | -1.2318592 | 0.06266076 | -19.65918  | 4.8246E-86 | 4.2127E-84 |
| ERICH4   | ENSG00000204978 | protein_coding | 58.2296104 | -3.6290895 | 0.19583201 | -18.531647 | 1.1472E-76 | 7.1648E-75 |
| PKHD1L1  | ENSG00000205038 | protein_coding | 30.7760284 | -2.4705416 | 0.22088506 | -11.184738 | 4.8433E-29 | 4.5929E-28 |
| CCNI2    | ENSG00000205089 | protein_coding | 67.7135319 | -2.9393716 | 0.14454241 | -20.335704 | 6.2142E-92 | 6.7664E-90 |
| FRG2     | ENSG00000205097 | protein_coding | 1.6507654  | -4.0107521 | 0.53385024 | -7.5128787 | 5.7841E-14 | 2.3188E-13 |
| TMEM88B  | ENSG00000205116 | protein_coding | 1.06579863 | -1.3655742 | 0.2671154  | -5.1123003 | 3.1826E-07 | 7.6204E-07 |
| VIT      | ENSG00000205221 | protein_coding | 9.85736963 | -1.2513795 | 0.26915115 | -4.6493561 | 3.3297E-06 | 7.2578E-06 |
| CTXN3    | ENSG00000205279 | protein_coding | 322.454353 | -3.4102038 | 0.39374495 | -8.6609462 | 4.6786E-18 | 2.4397E-17 |
| MT1H     | ENSG00000205358 | protein_coding | 671.429458 | -4.3660752 | 0.34371074 | -12.702761 | 5.708E-37  | 7.8719E-36 |
| INSYN1   | ENSG00000205363 | protein_coding | 428.907744 | -1.0717824 | 0.27675505 | -3.8726751 | 0.00010765 | 0.00020205 |
| LIN52    | ENSG00000205659 | protein_coding | 627.217237 | -1.1183448 | 0.06225115 | -17.965047 | 3.6597E-72 | 1.9042E-70 |
| ARSH     | ENSG00000205667 | protein_coding | 1.00803603 | -2.9854297 | 0.33691159 | -8.8611667 | 7.9181E-19 | 4.3263E-18 |
| ACOT6    | ENSG00000205669 | protein_coding | 12.4122881 | -2.2298554 | 0.18585237 | -11.997993 | 3.6402E-33 | 4.2033E-32 |
| CYS1     | ENSG00000205795 | protein_coding | 6863.75055 | -2.097973  | 0.1559669  | -13.451399 | 3.021E-41  | 4.9654E-40 |
| GMNC     | ENSG00000205835 | protein_coding | 67.7300912 | -3.5591986 | 0.32071517 | -11.097693 | 1.2872E-28 | 1.1916E-27 |
| C21orf62 | ENSG00000205929 | protein_coding | 413.874195 | -2.2341456 | 0.21330674 | -10.473863 | 1.139E-25  | 9.0662E-25 |
| SMIM21   | ENSG00000206026 | protein_coding | 1.00962436 | -1.2275201 | 0.33406454 | -3.6745    | 0.00023832 | 0.00043068 |
| VGLL3    | ENSG00000206538 | protein_coding | 531.42628  | -1.3169708 | 0.1903565  | -6.9184443 | 4.5663E-12 | 1.6014E-11 |
| XKR4     | ENSG00000206579 | protein_coding | 41.0893938 | -1.5849515 | 0.27321679 | -5.8010766 | 6.589E-09  | 1.8166E-08 |
| GPX3     | ENSG00000211445 | protein_coding | 182621.631 | -1.6257425 | 0.16178904 | -10.048533 | 9.3245E-24 | 6.6539E-23 |

|          |                 |                |            |            |            |            |            |            |
|----------|-----------------|----------------|------------|------------|------------|------------|------------|------------|
| DIO1     | ENSG00000211452 | protein_coding | 572.4254   | -4.8069653 | 0.27939758 | -17.204749 | 2.4463E-66 | 1.0269E-64 |
| SLC48A1  | ENSG00000211584 | protein_coding | 2322.20195 | -1.4374866 | 0.07460891 | -19.266958 | 1.0174E-82 | 7.7605E-81 |
| SYT3     | ENSG00000213023 | protein_coding | 29.1258905 | -1.2713551 | 0.21957822 | -5.7899874 | 7.0392E-09 | 1.9344E-08 |
| DENND1B  | ENSG00000213047 | protein_coding | 1229.00778 | -1.0565664 | 0.09580619 | -11.028164 | 2.7951E-28 | 2.5433E-27 |
| TCL1B    | ENSG00000213231 | protein_coding | 0.60512855 | -1.273493  | 0.36356914 | -3.5027532 | 0.00046048 | 0.00080669 |
| SYNJ2BP  | ENSG00000213463 | protein_coding | 3348.63556 | -1.2368678 | 0.08188024 | -15.105815 | 1.4826E-51 | 3.7261E-50 |
| ATP6V1G2 | ENSG00000213760 | protein_coding | 64.2607957 | -1.1387831 | 0.10803967 | -10.540416 | 5.6249E-26 | 4.5501E-25 |
| DNASE1   | ENSG00000213918 | protein_coding | 1720.62169 | -2.163509  | 0.19556296 | -11.062979 | 1.8969E-28 | 1.7391E-27 |
| CLDN9    | ENSG00000213937 | protein_coding | 39.9330316 | -1.471622  | 0.19430566 | -7.5737473 | 3.6261E-14 | 1.4711E-13 |
| ZNF726   | ENSG00000213967 | protein_coding | 78.5412205 | -1.4445355 | 0.13275628 | -10.881109 | 1.4183E-27 | 1.2441E-26 |
| ZNF99    | ENSG00000213973 | protein_coding | 21.1450761 | -1.2507847 | 0.21446809 | -5.8320319 | 5.4756E-09 | 1.5201E-08 |
| WEE2     | ENSG00000214102 | protein_coding | 11.4629597 | -1.7685558 | 0.13922206 | -12.703129 | 5.6812E-37 | 7.8396E-36 |
| TMEM213  | ENSG00000214128 | protein_coding | 4673.62955 | -2.8479796 | 0.45715761 | -6.2297542 | 4.6717E-10 | 1.4175E-09 |
| PLIN5    | ENSG00000214456 | protein_coding | 177.590311 | -1.4477019 | 0.20351685 | -7.1134254 | 1.132E-12  | 4.1513E-12 |
| B3GNT10  | ENSG00000214654 | protein_coding | 92.8140734 | -1.2828889 | 0.10417979 | -12.314183 | 7.5981E-35 | 9.4854E-34 |
| IQCF6    | ENSG00000214686 | protein_coding | 1.98038441 | -1.8482367 | 0.2952432  | -6.2600483 | 3.8486E-10 | 1.1742E-09 |
| FER1L6   | ENSG00000214814 | protein_coding | 84.8859283 | -3.3589199 | 0.28106029 | -11.950888 | 6.4236E-33 | 7.3195E-32 |
| PNMA6E   | ENSG00000214897 | protein_coding | 0.45736174 | -1.2726441 | 0.49038683 | -2.595184  | 0.00945403 | 0.0142018  |
| RNF212B  | ENSG00000215277 | protein_coding | 49.5987246 | -4.1372982 | 0.201741   | -20.50797  | 1.8277E-93 | 2.1428E-91 |
| SIAH3    | ENSG00000215475 | protein_coding | 70.7990596 | -5.204702  | 0.2475327  | -21.026321 | 3.7676E-98 | 5.2979E-96 |
| GCGR     | ENSG00000215644 | protein_coding | 310.305118 | -2.247988  | 0.48634207 | -4.6222362 | 3.7963E-06 | 8.2265E-06 |
| PLXNA4   | ENSG00000221866 | protein_coding | 266.825413 | -2.4296537 | 0.21932531 | -11.077854 | 1.6068E-28 | 1.4784E-27 |
| ZNF844   | ENSG00000223547 | protein_coding | 1343.03557 | -1.0088061 | 0.1056594  | -9.5477175 | 1.3259E-21 | 8.4473E-21 |
| TINCR    | ENSG00000223573 | protein_coding | 37.2374422 | -2.334591  | 0.17101673 | -13.651243 | 1.9846E-42 | 3.4279E-41 |
| MKRN2OS  | ENSG00000225526 | protein_coding | 21.5263409 | -1.1430886 | 0.16985859 | -6.7296485 | 1.7007E-11 | 5.728E-11  |

|            |                 |                |            |            |            |            |            |            |
|------------|-----------------|----------------|------------|------------|------------|------------|------------|------------|
| FRG2B      | ENSG00000225899 | protein_coding | 4.45851758 | -4.1495838 | 0.55783404 | -7.4387424 | 1.0165E-13 | 4.0087E-13 |
| ELFN1      | ENSG00000225968 | protein_coding | 433.583323 | -1.0154416 | 0.12721946 | -7.9818101 | 1.442E-15  | 6.4372E-15 |
| C13orf42   | ENSG00000226792 | protein_coding | 4.5278247  | -5.393785  | 0.25477204 | -21.171024 | 1.767E-99  | 2.563E-97  |
| ERVMER34-1 | ENSG00000226887 | protein_coding | 161.27407  | -4.6819289 | 0.23406034 | -20.003085 | 5.1769E-89 | 5.0172E-87 |
| C14orf132  | ENSG00000227051 | protein_coding | 783.439734 | -1.4263285 | 0.18746826 | -7.6083731 | 2.7757E-14 | 1.1342E-13 |
| MRLN       | ENSG00000227877 | protein_coding | 18.4325462 | -4.4998609 | 0.28896502 | -15.572338 | 1.1223E-54 | 3.164E-53  |
| IFNA14     | ENSG00000228083 | protein_coding | 0.66648599 | -4.4233199 | 0.5062114  | -8.7380882 | 2.3709E-18 | 1.2575E-17 |
| ANKRD63    | ENSG00000230778 | protein_coding | 1.22502308 | -2.3514343 | 0.27803616 | -8.4572965 | 2.7365E-17 | 1.3614E-16 |
| TMEM229A   | ENSG00000234224 | protein_coding | 1.15834932 | -1.9945069 | 0.35529799 | -5.6136171 | 1.9814E-08 | 5.25E-08   |
| PINLYP     | ENSG00000234465 | protein_coding | 192.133573 | -1.0174543 | 0.15365144 | -6.6218342 | 3.5477E-11 | 1.1687E-10 |
| MCIDAS     | ENSG00000234602 | protein_coding | 6.46908159 | -1.7491753 | 0.34905297 | -5.0112031 | 5.4091E-07 | 1.2698E-06 |
| SHISA8     | ENSG00000234965 | protein_coding | 2.88348794 | -1.5763311 | 0.28607788 | -5.5101468 | 3.5853E-08 | 9.2904E-08 |
| ANKRD34C   | ENSG00000235711 | protein_coding | 4.11893599 | -1.0367127 | 0.28194177 | -3.6770455 | 0.00023595 | 0.00042664 |
| ARHGEF38   | ENSG00000236699 | protein_coding | 219.778057 | -1.4269465 | 0.19889368 | -7.1744183 | 7.2615E-13 | 2.698E-12  |
| CKMT1B     | ENSG00000237289 | protein_coding | 59.2532928 | -1.0578111 | 0.37708946 | -2.8051995 | 0.00502854 | 0.00782171 |
| RNF223     | ENSG00000237330 | protein_coding | 10.2848314 | -2.7754583 | 0.31761441 | -8.7384523 | 2.3633E-18 | 1.254E-17  |
| C1orf226   | ENSG00000239887 | protein_coding | 362.961938 | -2.7751911 | 0.15271293 | -18.1726   | 8.5069E-74 | 4.7326E-72 |
| STRIT1     | ENSG00000240045 | protein_coding | 18.3590862 | -2.2141005 | 0.29459366 | -7.5157779 | 5.6574E-14 | 2.2695E-13 |
| KRBOX1     | ENSG00000240747 | protein_coding | 23.1066356 | -1.2076762 | 0.19595306 | -6.1630893 | 7.1339E-10 | 2.1323E-09 |
| PLCXD2     | ENSG00000240891 | protein_coding | 208.678171 | -1.5696277 | 0.17955723 | -8.741657  | 2.2972E-18 | 1.2196E-17 |
| TDGF1      | ENSG00000241186 | protein_coding | 296.326211 | -3.217344  | 0.36414867 | -8.8352487 | 9.9876E-19 | 5.4227E-18 |
| C3orf85    | ENSG00000241224 | protein_coding | 54.8879444 | -3.3361489 | 0.30490013 | -10.941776 | 7.2761E-28 | 6.4929E-27 |
| SPRR2A     | ENSG00000241794 | protein_coding | 3.59626573 | -2.1518537 | 0.46827629 | -4.5952651 | 4.322E-06  | 9.3213E-06 |
| HOGA1      | ENSG00000241935 | protein_coding | 1849.16739 | -1.919885  | 0.1603416  | -11.973718 | 4.8792E-33 | 5.5973E-32 |
| MRPL33     | ENSG00000243147 | protein_coding | 1655.22262 | -1.0816346 | 0.05951908 | -18.172905 | 8.4598E-74 | 4.7121E-72 |

|                |                 |                |            |            |            |            |            |            |
|----------------|-----------------|----------------|------------|------------|------------|------------|------------|------------|
| VSIG8          | ENSG00000243284 | protein_coding | 27.441939  | -2.8762172 | 0.16738035 | -17.18372  | 3.5162E-66 | 1.4693E-64 |
| MRPS6          | ENSG00000243927 | protein_coding | 3439.15803 | -1.5861902 | 0.11870964 | -13.361932 | 1.0091E-40 | 1.6186E-39 |
| ACY1           | ENSG00000243989 | protein_coding | 540.089187 | -2.2037769 | 0.11577121 | -19.035621 | 8.6462E-81 | 6.193E-79  |
| MT1HL1         | ENSG00000244020 | protein_coding | 1.38006523 | -2.6055064 | 0.24293772 | -10.724997 | 7.7689E-27 | 6.5805E-26 |
| CFHR1          | ENSG00000244414 | protein_coding | 23.0292924 | -1.3671065 | 0.38713755 | -3.5313198 | 0.00041349 | 0.00072791 |
| ERVFRD-1       | ENSG00000244476 | protein_coding | 29.8086626 | -1.9299696 | 0.18275071 | -10.560668 | 4.5342E-26 | 3.684E-25  |
| CCDC13         | ENSG00000244607 | protein_coding | 72.5397313 | -1.4129253 | 0.139149   | -10.154045 | 3.1791E-24 | 2.3276E-23 |
| ADH1C          | ENSG00000248144 | protein_coding | 265.920545 | -4.3513578 | 0.29298956 | -14.85158  | 6.7948E-50 | 1.6023E-48 |
| APELA          | ENSG00000248329 | protein_coding | 28.6569514 | -3.2414876 | 0.37624273 | -8.6154159 | 6.9688E-18 | 3.5918E-17 |
| PCP4L1         | ENSG00000248485 | protein_coding | 12.8956819 | -1.1875348 | 0.15123726 | -7.8521311 | 4.0903E-15 | 1.7691E-14 |
| ABHD14A        | ENSG00000248487 | protein_coding | 747.448987 | -1.0118787 | 0.09476879 | -10.677341 | 1.2994E-26 | 1.0884E-25 |
| C4orf54        | ENSG00000248713 | protein_coding | 72.3306057 | -6.7607351 | 0.39567543 | -17.086568 | 1.8685E-65 | 7.607E-64  |
| SMIM31         | ENSG00000248771 | protein_coding | 3.53839005 | -3.3211938 | 0.42613281 | -7.7937999 | 6.5024E-15 | 2.7748E-14 |
| PCDHA11        | ENSG00000249158 | protein_coding | 68.9355884 | -1.0988175 | 0.24038061 | -4.5711569 | 4.8504E-06 | 1.0406E-05 |
| AP000311.1     | ENSG00000249209 | protein_coding | 0.3373482  | -1.0923471 | 0.33661322 | -3.2451103 | 0.00117405 | 0.00196717 |
| CLRN2          | ENSG00000249581 | protein_coding | 0.6134255  | -1.665452  | 0.31222273 | -5.3341792 | 9.5978E-08 | 2.4041E-07 |
| HS3ST5         | ENSG00000249853 | protein_coding | 10.7264972 | -3.2106097 | 0.32073316 | -10.010221 | 1.3745E-23 | 9.7262E-23 |
| KIAA1210       | ENSG00000250423 | protein_coding | 15.0752078 | -2.1650815 | 0.20912783 | -10.352909 | 4.0596E-25 | 3.124E-24  |
| CCDC169-SOHLH2 | ENSG00000250709 | protein_coding | 2.48827033 | -1.1487446 | 0.2804302  | -4.0963655 | 4.1969E-05 | 8.2246E-05 |
| PRODH2         | ENSG00000250799 | protein_coding | 1792.80906 | -2.2834993 | 0.22703305 | -10.058004 | 8.4698E-24 | 6.0619E-23 |
| PCDHA12        | ENSG00000251664 | protein_coding | 48.6983733 | -2.0476374 | 0.24433975 | -8.3802875 | 5.2799E-17 | 2.5792E-16 |
| C1orf210       | ENSG00000253313 | protein_coding | 711.743118 | -1.4309104 | 0.18068866 | -7.9192041 | 2.3904E-15 | 1.051E-14  |
| TRNP1          | ENSG00000253368 | protein_coding | 418.004132 | -1.8869401 | 0.22272623 | -8.4720154 | 2.4118E-17 | 1.204E-16  |
| SMIM18         | ENSG00000253457 | protein_coding | 4.23170839 | -1.3134932 | 0.24473382 | -5.3670275 | 8.0045E-08 | 2.0189E-07 |



|                    |                 |                |            |            |            |            |            |            |
|--------------------|-----------------|----------------|------------|------------|------------|------------|------------|------------|
| AL512785.2         | ENSG00000254706 | protein_coding | 2.81102773 | -2.8701553 | 0.20882025 | -13.744622 | 5.4859E-43 | 9.7511E-42 |
| SMIM35             | ENSG00000255274 | protein_coding | 1.06820103 | -1.4249918 | 0.21544238 | -6.6142598 | 3.7342E-11 | 1.2277E-10 |
| AL590560.2         | ENSG00000256029 | protein_coding | 3.69863598 | -3.9741754 | 0.25311454 | -15.701095 | 1.4865E-55 | 4.3102E-54 |
| ASIC5              | ENSG00000256394 | protein_coding | 1.56461909 | -1.7486294 | 0.4571505  | -3.8250629 | 0.00013074 | 0.00024305 |
| SALL3              | ENSG00000256463 | protein_coding | 84.8495616 | -2.3324142 | 0.53161246 | -4.3874332 | 1.147E-05  | 2.3737E-05 |
| NHLRC4             | ENSG00000257108 | protein_coding | 170.007518 | -3.2095059 | 0.14780913 | -21.713854 | 1.518E-104 | 2.729E-102 |
| AC004080.3         | ENSG00000257184 | protein_coding | 0.43878029 | -1.6144392 | 0.31653579 | -5.100337  | 3.3905E-07 | 8.0979E-07 |
| AC008770.1         | ENSG00000257355 | protein_coding | 0.96140549 | -1.4184485 | 0.20600801 | -6.8854048 | 5.7623E-12 | 2.008E-11  |
| ZNF878             | ENSG00000257446 | protein_coding | 15.9729413 | -1.2400332 | 0.1204196  | -10.297603 | 7.2239E-25 | 5.4744E-24 |
| AL355102.2         | ENSG00000258691 | protein_coding | 4.01885635 | -1.1358345 | 0.30380482 | -3.738698  | 0.00018498 | 0.00033856 |
| BLOC1S5-<br>TXNDC5 | ENSG00000259040 | protein_coding | 50.1398485 | -1.8226131 | 0.14723986 | -12.378531 | 3.4154E-35 | 4.3286E-34 |
| BUB1B-PAK6         | ENSG00000259288 | protein_coding | 0.42032702 | -1.8877946 | 0.47291399 | -3.991835  | 6.5564E-05 | 0.00012571 |
| CTXND1             | ENSG00000259417 | protein_coding | 245.425164 | -2.1324791 | 0.23191524 | -9.1950797 | 3.7472E-20 | 2.2019E-19 |
| LYPD8              | ENSG00000259823 | protein_coding | 69.0471083 | -1.4333191 | 0.26121708 | -5.4870805 | 4.0863E-08 | 1.0541E-07 |
| AL845331.1         | ENSG00000259916 | protein_coding | 10.6022137 | -1.8167049 | 0.17160757 | -10.586391 | 3.4462E-26 | 2.8155E-25 |
| TGFBR3L            | ENSG00000260001 | protein_coding | 17.7103395 | -1.9516277 | 0.17894992 | -10.906    | 1.079E-27  | 9.5488E-27 |
| CCDC187            | ENSG00000260220 | protein_coding | 8.33544724 | -1.6936102 | 0.37570715 | -4.5077933 | 6.5505E-06 | 1.3879E-05 |
| FRRS1L             | ENSG00000260230 | protein_coding | 8.31797062 | -1.7363052 | 0.27664134 | -6.2763766 | 3.4655E-10 | 1.0607E-09 |
| LY6L               | ENSG00000261667 | protein_coding | 4.08248361 | -4.1708561 | 0.61477565 | -6.7843547 | 1.1661E-11 | 3.9725E-11 |
| TCF24              | ENSG00000261787 | protein_coding | 10.7520514 | -5.0734983 | 0.27749193 | -18.283408 | 1.1219E-74 | 6.4529E-73 |
| MYMX               | ENSG00000262179 | protein_coding | 9.53144426 | -1.4936513 | 0.21791329 | -6.8543378 | 7.1644E-12 | 2.4822E-11 |
| MYZAP              | ENSG00000263155 | protein_coding | 159.30423  | -1.1884284 | 0.27217239 | -4.3664549 | 1.2628E-05 | 2.6017E-05 |
| TMEM238L           | ENSG00000263429 | protein_coding | 74.616564  | -7.1332945 | 0.20055506 | -35.567762 | 4.416E-277 | 6.748E-273 |
| AC135178.3         | ENSG00000263809 | protein_coding | 8.3110833  | -1.2500843 | 0.14035731 | -8.9064424 | 5.2696E-19 | 2.9069E-18 |

|              |                 |                |            |            |            |            |            |            |
|--------------|-----------------|----------------|------------|------------|------------|------------|------------|------------|
| DYNLL2       | ENSG00000264364 | protein_coding | 8025.04598 | -1.0149705 | 0.06446319 | -15.744963 | 7.4374E-56 | 2.1757E-54 |
| AC113554.1   | ENSG00000264813 | protein_coding | 1.6685241  | -1.8797732 | 0.24760839 | -7.5917186 | 3.1569E-14 | 1.2857E-13 |
| RBP3         | ENSG00000265203 | protein_coding | 1.03675418 | -2.6622515 | 0.31292106 | -8.5077418 | 1.7735E-17 | 8.9234E-17 |
| ZNF488       | ENSG00000265763 | protein_coding | 33.5165401 | -3.5317077 | 0.21630704 | -16.32729  | 6.3127E-60 | 2.1341E-58 |
| KLF14        | ENSG00000266265 | protein_coding | 1.94130765 | -1.0802882 | 0.31502172 | -3.4292499 | 0.00060525 | 0.00104601 |
| AC011195.2   | ENSG00000266826 | protein_coding | 0.90380305 | -1.0338815 | 0.28301664 | -3.6530768 | 0.00025912 | 0.00046647 |
| AC091551.1   | ENSG00000267699 | protein_coding | 4.20071698 | -1.0963004 | 0.13361678 | -8.204811  | 2.3095E-16 | 1.0818E-15 |
| AC011479.1   | ENSG00000267748 | protein_coding | 9.53524259 | -1.0213525 | 0.19006643 | -5.3736606 | 7.7154E-08 | 1.9497E-07 |
| SMIM22       | ENSG00000267795 | protein_coding | 110.727039 | -2.1674289 | 0.29277443 | -7.4030677 | 1.3307E-13 | 5.2041E-13 |
| ARL14EPL     | ENSG00000268223 | protein_coding | 2.51826891 | -2.5002021 | 0.37325319 | -6.6984077 | 2.107E-11  | 7.0554E-11 |
| SCGB1C2      | ENSG00000268320 | protein_coding | 0.90667844 | -2.2108467 | 0.51878112 | -4.2616176 | 2.0295E-05 | 4.1008E-05 |
| ZNF728       | ENSG00000269067 | protein_coding | 18.3909942 | -2.4197194 | 0.30600167 | -7.9075368 | 2.6253E-15 | 1.1505E-14 |
| ZIM2         | ENSG00000269699 | protein_coding | 3.46295995 | -1.6301361 | 0.19998829 | -8.1511579 | 3.6046E-16 | 1.668E-15  |
| RNF225       | ENSG00000269855 | protein_coding | 0.6661046  | -1.6652478 | 0.2771105  | -6.0093276 | 1.8629E-09 | 5.3825E-09 |
| C17orf50     | ENSG00000270806 | protein_coding | 2.95365098 | -1.0369105 | 0.21967937 | -4.7201089 | 2.3572E-06 | 5.2057E-06 |
| SMIM32       | ENSG00000271824 | protein_coding | 728.657734 | -1.2895428 | 0.26852086 | -4.8023934 | 1.5678E-06 | 3.522E-06  |
| FAM47E-STBD1 | ENSG00000272414 | protein_coding | 5.24767132 | -1.0457043 | 0.15364882 | -6.8058075 | 1.0048E-11 | 3.4378E-11 |
| DOC2B        | ENSG00000272636 | protein_coding | 928.817798 | -1.2957108 | 0.12356018 | -10.486475 | 9.9678E-26 | 7.9564E-25 |
| C2orf15      | ENSG00000273045 | protein_coding | 130.556814 | -1.8561129 | 0.10538297 | -17.613025 | 1.957E-69  | 9.2011E-68 |
| AL359736.1   | ENSG00000273167 | protein_coding | 1.51444358 | -3.0382908 | 0.17166778 | -17.698666 | 4.2935E-70 | 2.074E-68  |
| AL049839.2   | ENSG00000273259 | protein_coding | 12.1881517 | -1.947991  | 0.30288921 | -6.4313647 | 1.2646E-10 | 3.9942E-10 |
| ZBTB8B       | ENSG00000273274 | protein_coding | 6.91738499 | -1.620617  | 0.18712276 | -8.6607158 | 4.6881E-18 | 2.4441E-17 |
| LHX1         | ENSG00000273706 | protein_coding | 173.506137 | -3.4063842 | 0.38169169 | -8.924439  | 4.4796E-19 | 2.4792E-18 |
| CBSL         | ENSG00000274276 | protein_coding | 4.51240009 | -1.3814224 | 0.30344988 | -4.5523907 | 5.304E-06  | 1.1334E-05 |
| CCL23        | ENSG00000274736 | protein_coding | 21.8674582 | -1.4910024 | 0.13013129 | -11.457677 | 2.1521E-30 | 2.1711E-29 |

|            |                 |                |            |            |            |            |            |            |
|------------|-----------------|----------------|------------|------------|------------|------------|------------|------------|
| AC117457.1 | ENSG00000275163 | protein_coding | 1.76875621 | -2.3958193 | 0.39814308 | -6.0174832 | 1.7715E-09 | 5.1267E-09 |
| FCGBP      | ENSG00000275395 | protein_coding | 2386.78779 | -1.1383288 | 0.20143066 | -5.651219  | 1.5931E-08 | 4.2576E-08 |
| AL627230.1 | ENSG00000275493 | protein_coding | 2.65311406 | -1.3872927 | 0.21698337 | -6.3935436 | 1.6208E-10 | 5.0804E-10 |
| CRYAA2     | ENSG00000276076 | protein_coding | 6.05971249 | -3.9054677 | 0.70974602 | -5.5026272 | 3.7417E-08 | 9.6841E-08 |
| KCNE1B     | ENSG00000276289 | protein_coding | 9.78325103 | -5.1687588 | 0.27283196 | -18.944844 | 4.8703E-80 | 3.4034E-78 |
| DACH1      | ENSG00000276644 | protein_coding | 596.437405 | -2.3835038 | 0.14907668 | -15.988442 | 1.5383E-57 | 4.7971E-56 |
| PNMA8C     | ENSG00000277531 | protein_coding | 1.99836396 | -1.0848617 | 0.22101745 | -4.9084888 | 9.1781E-07 | 2.108E-06  |
| OR13C5     | ENSG00000277556 | protein_coding | 0.36591739 | -1.5058325 | 0.30502514 | -4.9367489 | 7.9436E-07 | 1.8358E-06 |
| AC007906.2 | ENSG00000277639 | protein_coding | 285.48434  | -3.9931773 | 0.19016348 | -20.998655 | 6.7468E-98 | 9.3439E-96 |
| SRD5A2     | ENSG00000277893 | protein_coding | 12.5027885 | -2.2498825 | 0.22113536 | -10.174232 | 2.5843E-24 | 1.9043E-23 |
| SSTR3      | ENSG00000278195 | protein_coding | 9.72753176 | -1.0351789 | 0.21871974 | -4.7329012 | 2.2133E-06 | 4.9015E-06 |
| DHRS11     | ENSG00000278535 | protein_coding | 502.502479 | -1.4389093 | 0.09186105 | -15.663975 | 2.6669E-55 | 7.6553E-54 |
| PCDH20     | ENSG00000280165 | protein_coding | 4.17638379 | -1.3460831 | 0.29377632 | -4.5820002 | 4.6055E-06 | 9.9067E-06 |
| AC006059.2 | ENSG00000280571 | protein_coding | 1.07156003 | -1.0625097 | 0.20368444 | -5.2164503 | 1.8238E-07 | 4.4612E-07 |
| BLACAT1    | ENSG00000281406 | protein_coding | 27.4059526 | -1.4705494 | 0.22885999 | -6.4255418 | 1.314E-10  | 4.1457E-10 |
| FGR        | ENSG00000000938 | protein_coding | 1056.34837 | 1.50711095 | 0.09995442 | 15.0779817 | 2.2607E-51 | 5.6446E-50 |
| SEMA3F     | ENSG00000001617 | protein_coding | 6403.27312 | 1.13742379 | 0.08976549 | 12.671059  | 8.5552E-37 | 1.1721E-35 |
| CD99       | ENSG00000002586 | protein_coding | 9710.44075 | 1.26431236 | 0.08537479 | 14.8089662 | 1.282E-49  | 2.9891E-48 |
| TMEM176A   | ENSG00000002933 | protein_coding | 29342.985  | 1.27274993 | 0.12599214 | 10.1018203 | 5.4226E-24 | 3.9208E-23 |
| TFPI       | ENSG00000003436 | protein_coding | 12877.7018 | 1.06102541 | 0.14387908 | 7.37442431 | 1.6506E-13 | 6.4127E-13 |
| PLXND1     | ENSG00000004399 | protein_coding | 14457.9086 | 1.59208185 | 0.09135616 | 17.4271982 | 5.1299E-68 | 2.2853E-66 |
| CD38       | ENSG00000004468 | protein_coding | 489.708311 | 1.85108593 | 0.16191888 | 11.432181  | 2.8876E-30 | 2.8946E-29 |
| CAMKK1     | ENSG00000004660 | protein_coding | 890.25019  | 1.45535411 | 0.08297678 | 17.5392946 | 7.1813E-69 | 3.3119E-67 |
| ARHGAP33   | ENSG00000004777 | protein_coding | 638.301678 | 2.09301764 | 0.14362768 | 14.5725231 | 4.2008E-48 | 9.2095E-47 |
| SLC22A16   | ENSG00000004809 | protein_coding | 16.4815187 | 2.10049003 | 0.218326   | 9.62088815 | 6.5265E-22 | 4.2329E-21 |

|          |                 |                |            |            |            |            |            |            |
|----------|-----------------|----------------|------------|------------|------------|------------|------------|------------|
| ABCB5    | ENSG00000004846 | protein_coding | 21.1718343 | 2.04426612 | 0.30653706 | 6.66890374 | 2.5772E-11 | 8.5809E-11 |
| ARX      | ENSG00000004848 | protein_coding | 48.9530364 | 3.54513545 | 0.40306681 | 8.79540394 | 1.4253E-18 | 7.6707E-18 |
| CALCR    | ENSG00000004948 | protein_coding | 382.254578 | 1.17517084 | 0.23274558 | 5.04916503 | 4.4375E-07 | 1.0495E-06 |
| MCUB     | ENSG00000005059 | protein_coding | 638.822374 | 1.63366744 | 0.11125226 | 14.6843526 | 8.1206E-49 | 1.8356E-47 |
| WDR54    | ENSG00000005448 | protein_coding | 1728.1218  | 1.14841891 | 0.09522678 | 12.0598319 | 1.7213E-33 | 2.0145E-32 |
| ABCB4    | ENSG00000005471 | protein_coding | 337.57066  | 2.1030136  | 0.16736505 | 12.5654284 | 3.271E-36  | 4.3589E-35 |
| ITGAL    | ENSG00000005844 | protein_coding | 2376.72049 | 2.50740986 | 0.13231635 | 18.950114  | 4.4063E-80 | 3.098E-78  |
| YBX2     | ENSG00000006047 | protein_coding | 179.918131 | 1.34553515 | 0.19979025 | 6.73473871 | 1.6422E-11 | 5.5383E-11 |
| KRT33A   | ENSG00000006059 | protein_coding | 2.37247729 | 2.89853668 | 0.42625055 | 6.80007723 | 1.0456E-11 | 3.5733E-11 |
| MAP3K14  | ENSG00000006062 | protein_coding | 2430.2516  | 1.36323192 | 0.09850039 | 13.8398635 | 1.4648E-43 | 2.6679E-42 |
| TMEM132A | ENSG00000006118 | protein_coding | 2039.13719 | 1.20605431 | 0.13196581 | 9.13914194 | 6.295E-20  | 3.6625E-19 |
| DLX6     | ENSG00000006377 | protein_coding | 26.5359064 | 2.58675268 | 0.16813814 | 15.3846869 | 2.0738E-53 | 5.5953E-52 |
| LGALS14  | ENSG00000006659 | protein_coding | 0.86981621 | 2.08314255 | 0.48154881 | 4.32592188 | 1.519E-05  | 3.1054E-05 |
| MYH13    | ENSG00000006788 | protein_coding | 25.5107963 | 4.70486741 | 0.40499197 | 11.6171869 | 3.3705E-31 | 3.5373E-30 |
| PRSS21   | ENSG00000007038 | protein_coding | 12.6793997 | 2.26818711 | 0.25083763 | 9.04245137 | 1.532E-19  | 8.7206E-19 |
| CEACAM21 | ENSG00000007129 | protein_coding | 122.882104 | 1.85253404 | 0.12109209 | 15.2985556 | 7.8172E-53 | 2.0714E-51 |
| MATK     | ENSG00000007264 | protein_coding | 316.79853  | 2.24558281 | 0.12791547 | 17.5552089 | 5.4267E-69 | 2.5102E-67 |
| SCN4A    | ENSG00000007314 | protein_coding | 398.009715 | 1.63478412 | 0.17759552 | 9.20509773 | 3.4136E-20 | 2.0095E-19 |
| LUC7L    | ENSG00000007392 | protein_coding | 1852.29869 | 1.03069197 | 0.10693286 | 9.63868361 | 5.4887E-22 | 3.5715E-21 |
| E2F2     | ENSG00000007968 | protein_coding | 115.513363 | 2.34677931 | 0.13012353 | 18.0350106 | 1.0348E-72 | 5.4964E-71 |
| SYN1     | ENSG00000008056 | protein_coding | 134.059637 | 1.1862748  | 0.16924318 | 7.00929141 | 2.3953E-12 | 8.5756E-12 |
| TFAP2D   | ENSG00000008197 | protein_coding | 0.94298707 | 2.51030852 | 0.5232717  | 4.79733284 | 1.6079E-06 | 3.6073E-06 |
| CELSR3   | ENSG00000008300 | protein_coding | 149.725924 | 1.47578007 | 0.1542499  | 9.56746187 | 1.0956E-21 | 7.0195E-21 |
| PGLYRP1  | ENSG00000008438 | protein_coding | 7.0970313  | 1.23502626 | 0.21067066 | 5.86235535 | 4.5635E-09 | 1.276E-08  |
| MMP25    | ENSG00000008516 | protein_coding | 149.876536 | 2.08303087 | 0.11685698 | 17.8254731 | 4.4828E-71 | 2.2582E-69 |

|           |                 |                |            |            |            |            |            |            |
|-----------|-----------------|----------------|------------|------------|------------|------------|------------|------------|
| IL32      | ENSG00000008517 | protein_coding | 14531.8976 | 1.96517301 | 0.13419565 | 14.6440893 | 1.4696E-48 | 3.2862E-47 |
| RPS20     | ENSG00000008988 | protein_coding | 45728.5265 | 1.0599054  | 0.09312425 | 11.3816259 | 5.1628E-30 | 5.1116E-29 |
| TENM1     | ENSG00000009694 | protein_coding | 1366.07542 | 2.4452697  | 0.15717553 | 15.5575722 | 1.4136E-54 | 3.9609E-53 |
| PAX7      | ENSG00000009709 | protein_coding | 1.05982318 | 1.34788077 | 0.46447668 | 2.90193422 | 0.00370866 | 0.00587088 |
| TRAF3IP3  | ENSG00000009790 | protein_coding | 537.720628 | 1.84218407 | 0.13041247 | 14.1258271 | 2.6329E-45 | 5.1251E-44 |
| ETV7      | ENSG00000010030 | protein_coding | 519.660096 | 2.68774046 | 0.13257256 | 20.2737319 | 2.1937E-91 | 2.3118E-89 |
| HHATL     | ENSG00000010282 | protein_coding | 142.592129 | 4.60448965 | 0.46385003 | 9.92667746 | 3.187E-23  | 2.2105E-22 |
| IFFO1     | ENSG00000010295 | protein_coding | 1377.12627 | 1.75919374 | 0.09382041 | 18.7506501 | 1.9124E-78 | 1.2742E-76 |
| STAB1     | ENSG00000010327 | protein_coding | 8251.63299 | 1.68569066 | 0.10754397 | 15.6744315 | 2.2624E-55 | 6.5145E-54 |
| SLC6A13   | ENSG00000010379 | protein_coding | 9143.43665 | 1.03338784 | 0.19802986 | 5.21834344 | 1.8053E-07 | 4.4177E-07 |
| CD4       | ENSG00000010610 | protein_coding | 5580.93079 | 1.77837053 | 0.106207   | 16.7443813 | 6.2234E-63 | 2.3063E-61 |
| BTK       | ENSG00000010671 | protein_coding | 596.104184 | 2.17328735 | 0.11311321 | 19.2133823 | 2.8601E-82 | 2.1458E-80 |
| NME1-NME2 | ENSG00000011052 | protein_coding | 27.9745446 | 1.04430831 | 0.11888318 | 8.78432315 | 1.5731E-18 | 8.445E-18  |
| SLC6A7    | ENSG00000011083 | protein_coding | 4.91642474 | 1.98080189 | 0.24523807 | 8.07705718 | 6.6348E-16 | 3.0182E-15 |
| ANOS1     | ENSG00000011201 | protein_coding | 549.507213 | 1.00145457 | 0.12266548 | 8.16411066 | 3.2381E-16 | 1.5024E-15 |
| DPF1      | ENSG00000011332 | protein_coding | 17.6495131 | 1.1676141  | 0.17482238 | 6.67885924 | 2.4081E-11 | 8.0342E-11 |
| PLAUR     | ENSG00000011422 | protein_coding | 1310.11121 | 1.54510985 | 0.14414096 | 10.7194366 | 8.2504E-27 | 6.9742E-26 |
| ANLN      | ENSG00000011426 | protein_coding | 664.554173 | 2.3051503  | 0.15898184 | 14.4994564 | 1.2211E-47 | 2.6159E-46 |
| ZBTB32    | ENSG00000011590 | protein_coding | 38.5568458 | 1.79698842 | 0.14044714 | 12.794767  | 1.7538E-37 | 2.4737E-36 |
| TYROBP    | ENSG00000011600 | protein_coding | 4611.63749 | 2.65058809 | 0.12228064 | 21.6762697 | 3.436E-104 | 6.106E-102 |
| CD22      | ENSG00000012124 | protein_coding | 270.976467 | 1.24313338 | 0.15392825 | 8.07605744 | 6.6894E-16 | 3.0428E-15 |
| ALOX5     | ENSG00000012779 | protein_coding | 2466.55232 | 2.0804627  | 0.1504414  | 13.829057  | 1.7024E-43 | 3.0906E-42 |
| CLK1      | ENSG00000013441 | protein_coding | 5184.56302 | 1.14931445 | 0.1005843  | 11.4263803 | 3.0871E-30 | 3.0899E-29 |
| DDX11     | ENSG00000013573 | protein_coding | 979.988919 | 1.26295417 | 0.10727813 | 11.7727084 | 5.3964E-32 | 5.8941E-31 |
| CD6       | ENSG00000013725 | protein_coding | 613.103314 | 2.3539462  | 0.13500259 | 17.4363038 | 4.3747E-68 | 1.9584E-66 |

|                    |                 |                |            |            |            |            |            |            |
|--------------------|-----------------|----------------|------------|------------|------------|------------|------------|------------|
| TACC3              | ENSG00000013810 | protein_coding | 1010.20016 | 1.45543656 | 0.09803557 | 14.8460043 | 7.3841E-50 | 1.7394E-48 |
| MTMR11             | ENSG00000014914 | protein_coding | 3111.5826  | 1.58564994 | 0.11211    | 14.1436983 | 2.0426E-45 | 3.9896E-44 |
| WAS                | ENSG00000015285 | protein_coding | 1007.18579 | 2.16625347 | 0.11824933 | 18.3193717 | 5.7978E-75 | 3.3643E-73 |
| BID                | ENSG00000015475 | protein_coding | 1438.04388 | 1.09680589 | 0.0656298  | 16.7120091 | 1.0716E-62 | 3.9521E-61 |
| CLCA1              | ENSG00000016490 | protein_coding | 0.60503899 | 1.16107388 | 0.52386408 | 2.21636473 | 0.02666653 | 0.0375667  |
| SLC38A5            | ENSG00000017483 | protein_coding | 732.717521 | 1.71952225 | 0.26427416 | 6.50658493 | 7.6878E-11 | 2.4707E-10 |
| SLC11A1            | ENSG00000018280 | protein_coding | 726.17681  | 2.37978064 | 0.14196463 | 16.7631942 | 4.5359E-63 | 1.6905E-61 |
| MARCO              | ENSG00000019169 | protein_coding | 287.420255 | 2.37453526 | 0.23683454 | 10.0261359 | 1.1701E-23 | 8.3081E-23 |
| CD74               | ENSG00000019582 | protein_coding | 239481.823 | 1.74305166 | 0.11148168 | 15.6353194 | 4.1837E-55 | 1.1949E-53 |
| ADGRA2             | ENSG00000020181 | protein_coding | 3973.87366 | 1.32745771 | 0.11504973 | 11.5381208 | 8.4757E-31 | 8.6959E-30 |
| RUNX3              | ENSG00000020633 | protein_coding | 1378.11567 | 2.66924409 | 0.13152381 | 20.2947588 | 1.4305E-91 | 1.5215E-89 |
| CYP3A43            | ENSG00000021461 | protein_coding | 9.66779966 | 1.78570979 | 0.20367571 | 8.76741658 | 1.8281E-18 | 9.7718E-18 |
| NRXN3              | ENSG00000021645 | protein_coding | 702.781609 | 1.37754327 | 0.16849136 | 8.17575041 | 2.9403E-16 | 1.368E-15  |
| FHL1               | ENSG00000022267 | protein_coding | 18572.2211 | 1.70179169 | 0.16099697 | 10.5703335 | 4.0904E-26 | 3.3287E-25 |
| BIRC3              | ENSG00000023445 | protein_coding | 10071.2487 | 2.31413611 | 0.14189471 | 16.3088253 | 8.542E-60  | 2.8792E-58 |
| DEF6               | ENSG00000023892 | protein_coding | 767.6802   | 2.26194384 | 0.12063636 | 18.7501006 | 1.9323E-78 | 1.2856E-76 |
| PLEKHO1            | ENSG00000023902 | protein_coding | 2913.83642 | 1.77819381 | 0.10362981 | 17.1590955 | 5.3744E-66 | 2.2316E-64 |
| EHD2               | ENSG00000024422 | protein_coding | 18657.3155 | 2.23520712 | 0.10456664 | 21.3759098 | 2.239E-101 | 3.552E-99  |
| DEPDC1             | ENSG00000024526 | protein_coding | 150.180293 | 2.38028215 | 0.15682867 | 15.1775954 | 4.977E-52  | 1.2853E-50 |
| NR1H3              | ENSG00000025434 | protein_coding | 2169.35124 | 1.0227372  | 0.0761032  | 13.4388205 | 3.581E-41  | 5.8606E-40 |
| TYMP               | ENSG00000025708 | protein_coding | 5774.87734 | 2.93744104 | 0.12401461 | 23.6862508 | 4.997E-124 | 1.58E-121  |
| VIM                | ENSG00000026025 | protein_coding | 166640.828 | 2.5599207  | 0.09459181 | 27.0628147 | 2.699E-161 | 2.475E-158 |
| RTEL1-<br>TNFRSF6B | ENSG00000026036 | protein_coding | 197.760279 | 2.46614551 | 0.14768406 | 16.6987925 | 1.3374E-62 | 4.9087E-61 |
| FAS                | ENSG00000026103 | protein_coding | 1985.33023 | 1.19284739 | 0.08335751 | 14.3100166 | 1.8947E-46 | 3.8791E-45 |



|          |                 |                |            |            |            |            |            |            |
|----------|-----------------|----------------|------------|------------|------------|------------|------------|------------|
| RNASET2  | ENSG00000026297 | protein_coding | 13576.2515 | 3.34853997 | 0.15719255 | 21.3021538 | 1.084E-100 | 1.6622E-98 |
| CD44     | ENSG00000026508 | protein_coding | 10520.496  | 1.40020237 | 0.14319926 | 9.77799996 | 1.3995E-22 | 9.3902E-22 |
| SLAMF7   | ENSG00000026751 | protein_coding | 1168.21018 | 2.80827451 | 0.1716285  | 16.3625189 | 3.5417E-60 | 1.2089E-58 |
| BTN3A1   | ENSG00000026950 | protein_coding | 4511.41836 | 1.86557106 | 0.08979652 | 20.7755389 | 7.2051E-96 | 9.2778E-94 |
| SH2D2A   | ENSG00000027869 | protein_coding | 340.112355 | 2.72531249 | 0.15952088 | 17.0843623 | 1.9405E-65 | 7.8932E-64 |
| TNFRSF1B | ENSG00000028137 | protein_coding | 4455.96589 | 1.41505369 | 0.0889372  | 15.9107062 | 5.3408E-57 | 1.6224E-55 |
| POU2F2   | ENSG00000028277 | protein_coding | 668.023035 | 1.9407829  | 0.13575941 | 14.2957522 | 2.3258E-46 | 4.7385E-45 |
| ANK1     | ENSG00000029534 | protein_coding | 649.292698 | 2.21122609 | 0.19149129 | 11.5473975 | 7.609E-31  | 7.8277E-30 |
| IBSP     | ENSG00000029559 | protein_coding | 60.5087507 | 5.13101889 | 0.32845371 | 15.6217412 | 5.1772E-55 | 1.475E-53  |
| LRRC7    | ENSG00000033122 | protein_coding | 190.234881 | 1.46899756 | 0.17061424 | 8.61005239 | 7.3027E-18 | 3.7597E-17 |
| APBA2    | ENSG00000034053 | protein_coding | 208.224017 | 1.24993379 | 0.17613816 | 7.09632596 | 1.2812E-12 | 4.6816E-12 |
| TMSB10   | ENSG00000034510 | protein_coding | 68952.6592 | 2.12835549 | 0.10822741 | 19.6655858 | 4.2523E-86 | 3.72E-84   |
| SLC18A1  | ENSG00000036565 | protein_coding | 6.21915507 | 1.15840664 | 0.19720398 | 5.87415437 | 4.2501E-09 | 1.1912E-08 |
| FLT4     | ENSG00000037280 | protein_coding | 4613.87226 | 1.12311768 | 0.11334593 | 9.90876033 | 3.8135E-23 | 2.6327E-22 |
| TLL1     | ENSG00000038295 | protein_coding | 974.297083 | 1.52909179 | 0.14777738 | 10.3472654 | 4.3061E-25 | 3.3065E-24 |
| VCAN     | ENSG00000038427 | protein_coding | 19810.9706 | 1.87844208 | 0.17311975 | 10.8505357 | 1.9826E-27 | 1.7282E-26 |
| MSR1     | ENSG00000038945 | protein_coding | 3436.17122 | 2.06575296 | 0.13645649 | 15.1385468 | 9.0185E-52 | 2.2929E-50 |
| C6       | ENSG00000039537 | protein_coding | 714.964318 | 1.53266997 | 0.24988061 | 6.13360904 | 8.5907E-10 | 2.5506E-09 |
| BEST2    | ENSG00000039987 | protein_coding | 2.2204805  | 2.18866744 | 0.34438459 | 6.35530012 | 2.0802E-10 | 6.4615E-10 |
| RTN4R    | ENSG00000040608 | protein_coding | 181.39355  | 1.09671736 | 0.13100562 | 8.37152934 | 5.6875E-17 | 2.7713E-16 |
| C2orf83  | ENSG00000042304 | protein_coding | 1.45711397 | 2.82433639 | 0.47291707 | 5.97215996 | 2.3413E-09 | 6.7122E-09 |
| ADAM28   | ENSG00000042980 | protein_coding | 1183.51761 | 1.28087754 | 0.11541071 | 11.0984286 | 1.2767E-28 | 1.1821E-27 |
| BARX2    | ENSG00000043039 | protein_coding | 2554.49532 | 2.6288891  | 0.13677335 | 19.2207699 | 2.4806E-82 | 1.8695E-80 |
| ZIC2     | ENSG00000043355 | protein_coding | 14.2841749 | 3.04613688 | 0.39456094 | 7.72032041 | 1.1604E-14 | 4.872E-14  |
| LCP2     | ENSG00000043462 | protein_coding | 2848.49075 | 2.20569397 | 0.09774272 | 22.5663259 | 9.285E-113 | 2.118E-110 |

|          |                 |                |            |            |            |            |            |            |
|----------|-----------------|----------------|------------|------------|------------|------------|------------|------------|
| GUCA2B   | ENSG00000044012 | protein_coding | 99.0836812 | 5.77097026 | 0.33577956 | 17.1867827 | 3.3353E-66 | 1.395E-64  |
| PHKA2    | ENSG00000044446 | protein_coding | 7807.53033 | 2.17015142 | 0.09119493 | 23.7968429 | 3.601E-125 | 1.171E-122 |
| EPHA3    | ENSG00000044524 | protein_coding | 1015.34529 | 1.74767726 | 0.14269944 | 12.2472607 | 1.7377E-34 | 2.1333E-33 |
| MAGEC2   | ENSG00000046774 | protein_coding | 3.04132358 | 2.78826852 | 0.85445872 | 3.26319861 | 0.00110162 | 0.00185115 |
| PREX2    | ENSG00000046889 | protein_coding | 3308.77373 | 2.05495677 | 0.16323815 | 12.5887044 | 2.4364E-36 | 3.2686E-35 |
| CP       | ENSG00000047457 | protein_coding | 25699.9141 | 4.5845425  | 0.23686879 | 19.3547766 | 1.858E-83  | 1.4559E-81 |
| NOP16    | ENSG00000048162 | protein_coding | 992.790096 | 1.11543142 | 0.07700185 | 14.4857734 | 1.4904E-47 | 3.1836E-46 |
| TNFRSF17 | ENSG00000048462 | protein_coding | 40.9928792 | 1.57605484 | 0.25532491 | 6.17274222 | 6.7116E-10 | 2.0094E-09 |
| GUCA1A   | ENSG00000048545 | protein_coding | 1.65688014 | 1.08472891 | 0.36713578 | 2.9545715  | 0.00313104 | 0.00500086 |
| UTS2     | ENSG00000049247 | protein_coding | 19.3246657 | 2.76201253 | 0.24594856 | 11.2300416 | 2.9034E-29 | 2.7908E-28 |
| TNFRSF9  | ENSG00000049249 | protein_coding | 514.184837 | 4.06039562 | 0.20894705 | 19.4326532 | 4.0868E-84 | 3.2752E-82 |
| RFC2     | ENSG00000049541 | protein_coding | 1537.69566 | 1.09869271 | 0.05683532 | 19.331162  | 2.9373E-83 | 2.2745E-81 |
| FOXP3    | ENSG00000049768 | protein_coding | 165.949276 | 1.6826817  | 0.16564273 | 10.1585004 | 3.0371E-24 | 2.2273E-23 |
| NFE2L3   | ENSG00000050344 | protein_coding | 2189.23601 | 1.36892376 | 0.11324473 | 12.0881895 | 1.2194E-33 | 1.4407E-32 |
| TNIP3    | ENSG00000050730 | protein_coding | 86.2313594 | 3.75376113 | 0.22325714 | 16.8136222 | 1.9395E-63 | 7.3661E-62 |
| COL23A1  | ENSG00000050767 | protein_coding | 11256.1869 | 5.17685488 | 0.17038312 | 30.3836137 | 9.043E-203 | 2.591E-199 |
| RAD51    | ENSG00000051180 | protein_coding | 134.413033 | 1.5927322  | 0.10594766 | 15.0331988 | 4.4499E-51 | 1.0961E-49 |
| POLQ     | ENSG00000051341 | protein_coding | 104.545882 | 2.14251467 | 0.14326372 | 14.9550397 | 1.444E-50  | 3.506E-49  |
| CYBA     | ENSG00000051523 | protein_coding | 7571.56089 | 1.22368575 | 0.11240072 | 10.8868145 | 1.3322E-27 | 1.1706E-26 |
| ENTPD2   | ENSG00000054179 | protein_coding | 741.346631 | 1.22596845 | 0.15514027 | 7.90232276 | 2.7375E-15 | 1.1988E-14 |
| PTPRN    | ENSG00000054356 | protein_coding | 340.374773 | 5.33740294 | 0.25829898 | 20.6636623 | 7.3567E-95 | 9.0656E-93 |
| CBLN4    | ENSG00000054803 | protein_coding | 259.369755 | 2.06515321 | 0.20796956 | 9.93007436 | 3.0803E-23 | 2.1381E-22 |
| RELT     | ENSG00000054967 | protein_coding | 465.914658 | 2.0776956  | 0.09376155 | 22.1593574 | 8.475E-109 | 1.742E-106 |
| ITIH4    | ENSG00000055955 | protein_coding | 51.7411034 | 2.38044796 | 0.22405815 | 10.624242  | 2.2987E-26 | 1.8973E-25 |
| ITIH1    | ENSG00000055957 | protein_coding | 63.387947  | 4.66034761 | 0.34268388 | 13.599553  | 4.0289E-42 | 6.8504E-41 |

|          |                 |                |            |            |            |            |            |            |
|----------|-----------------|----------------|------------|------------|------------|------------|------------|------------|
| TRAF3IP2 | ENSG00000056972 | protein_coding | 2451.25366 | 1.05434442 | 0.07156687 | 14.7322985 | 3.9987E-49 | 9.1333E-48 |
| MSH4     | ENSG00000057468 | protein_coding | 28.0416861 | 2.93231123 | 0.20321585 | 14.4295402 | 3.3732E-47 | 7.1095E-46 |
| PRDM1    | ENSG00000057657 | protein_coding | 2038.78026 | 2.26236893 | 0.09688079 | 23.352091  | 1.312E-120 | 3.691E-118 |
| TBXAS1   | ENSG00000059377 | protein_coding | 1669.54521 | 1.79176609 | 0.08737138 | 20.5074727 | 1.8464E-93 | 2.1592E-91 |
| SLC2A3   | ENSG00000059804 | protein_coding | 7391.57933 | 2.01500605 | 0.13906468 | 14.4897035 | 1.4075E-47 | 3.0094E-46 |
| YBX3     | ENSG00000060138 | protein_coding | 16304.4278 | 1.50740828 | 0.07802395 | 19.319815  | 3.6596E-83 | 2.8148E-81 |
| OGFR     | ENSG00000060491 | protein_coding | 3206.04062 | 1.04444165 | 0.06900722 | 15.1352514 | 9.4818E-52 | 2.4041E-50 |
| GNA15    | ENSG00000060558 | protein_coding | 403.823228 | 1.73557852 | 0.11494575 | 15.0991098 | 1.6413E-51 | 4.116E-50  |
| CREB3L3  | ENSG00000060566 | protein_coding | 1166.08457 | 2.66797304 | 0.25289861 | 10.5495757 | 5.1027E-26 | 4.1349E-25 |
| COL11A1  | ENSG00000060718 | protein_coding | 307.552106 | 2.70374024 | 0.27948921 | 9.67386262 | 3.894E-22  | 2.5511E-21 |
| BCAT1    | ENSG00000060982 | protein_coding | 1510.75111 | 1.42557216 | 0.14348312 | 9.93546947 | 2.918E-23  | 2.0273E-22 |
| LZTS1    | ENSG00000061337 | protein_coding | 2441.48694 | 2.37662985 | 0.1188446  | 19.997794  | 5.7563E-89 | 5.567E-87  |
| WNT8A    | ENSG00000061492 | protein_coding | 1.11465874 | 2.13920796 | 0.37320436 | 5.73200155 | 9.9252E-09 | 2.6948E-08 |
| SPAG4    | ENSG00000061656 | protein_coding | 2538.8419  | 4.09652261 | 0.11860413 | 34.5394589 | 2.052E-261 | 1.881E-257 |
| GUCY1B1  | ENSG00000061918 | protein_coding | 3898.01995 | 1.18162428 | 0.08283698 | 14.2644547 | 3.6443E-46 | 7.3594E-45 |
| TNK2     | ENSG00000061938 | protein_coding | 2150.86486 | 1.37559893 | 0.0912035  | 15.0827429 | 2.1035E-51 | 5.2662E-50 |
| VMP1     | ENSG00000062716 | protein_coding | 11882.6207 | 1.27696302 | 0.10441417 | 12.2297868 | 2.155E-34  | 2.6288E-33 |
| SEZ6     | ENSG00000063015 | protein_coding | 8.99021137 | 1.0027053  | 0.20880697 | 4.8020682  | 1.5704E-06 | 3.5274E-06 |
| RPL18    | ENSG00000063177 | protein_coding | 34909.9704 | 1.15104939 | 0.09307814 | 12.3664842 | 3.9681E-35 | 5.0125E-34 |
| AHRR     | ENSG00000063438 | protein_coding | 232.474231 | 1.46970864 | 0.16252675 | 9.04287243 | 1.5261E-19 | 8.6892E-19 |
| TSPAN32  | ENSG00000064201 | protein_coding | 123.839567 | 2.00550995 | 0.12383526 | 16.1949834 | 5.4713E-59 | 1.7966E-57 |
| CCN5     | ENSG00000064205 | protein_coding | 362.998324 | 3.33482262 | 0.28426303 | 11.7314681 | 8.792E-32  | 9.4877E-31 |
| DMRT3    | ENSG00000064218 | protein_coding | 8.34497022 | 4.30815822 | 0.48125317 | 8.95195802 | 3.4923E-19 | 1.9464E-18 |
| NGFR     | ENSG00000064300 | protein_coding | 1847.40023 | 1.84317615 | 0.15799698 | 11.6658949 | 1.9039E-31 | 2.0231E-30 |
| CDON     | ENSG00000064309 | protein_coding | 1630.50344 | 2.22656344 | 0.12989429 | 17.1413495 | 7.2938E-66 | 3.0068E-64 |

|         |                 |                |            |            |            |            |            |            |
|---------|-----------------|----------------|------------|------------|------------|------------|------------|------------|
| CHI3L2  | ENSG00000064886 | protein_coding | 377.703286 | 2.30361892 | 0.216092   | 10.6603618 | 1.5599E-26 | 1.3008E-25 |
| MCM10   | ENSG00000065328 | protein_coding | 113.020178 | 2.50640912 | 0.13351317 | 18.7727479 | 1.2619E-78 | 8.42E-77   |
| DGKA    | ENSG00000065357 | protein_coding | 973.288706 | 1.12060171 | 0.10030638 | 11.1717887 | 5.6041E-29 | 5.2968E-28 |
| PDIA5   | ENSG00000065485 | protein_coding | 4019.85485 | 1.74326515 | 0.10526436 | 16.56083   | 1.3374E-61 | 4.7451E-60 |
| COL17A1 | ENSG00000065618 | protein_coding | 97.692522  | 1.08291128 | 0.23533774 | 4.60151982 | 4.1942E-06 | 9.0585E-06 |
| ASPM    | ENSG00000066279 | protein_coding | 366.889263 | 2.62854867 | 0.15542832 | 16.911646  | 3.6925E-64 | 1.4369E-62 |
| CD84    | ENSG00000066294 | protein_coding | 1799.12987 | 2.7723769  | 0.1490797  | 18.5966093 | 3.4228E-77 | 2.1762E-75 |
| SPI1    | ENSG00000066336 | protein_coding | 1807.87913 | 2.34882363 | 0.11468502 | 20.4806494 | 3.2036E-93 | 3.7085E-91 |
| STAG3   | ENSG00000066923 | protein_coding | 288.595678 | 1.28119333 | 0.11383447 | 11.2548805 | 2.1912E-29 | 2.1143E-28 |
| PFKP    | ENSG00000067057 | protein_coding | 27918.2438 | 1.95940735 | 0.09409146 | 20.8244964 | 2.5964E-96 | 3.4399E-94 |
| CACNB1  | ENSG00000067191 | protein_coding | 263.3341   | 1.30038294 | 0.12035399 | 10.8046513 | 3.272E-27  | 2.8252E-26 |
| PRR11   | ENSG00000068489 | protein_coding | 344.727992 | 1.88608038 | 0.13195689 | 14.2931555 | 2.4142E-46 | 4.9099E-45 |
| ATP11A  | ENSG00000068650 | protein_coding | 16463.0183 | 1.47662854 | 0.11382424 | 12.972883  | 1.7435E-38 | 2.551E-37  |
| RASGRP2 | ENSG00000068831 | protein_coding | 621.920181 | 1.05205731 | 0.10651247 | 9.87731608 | 5.2213E-23 | 3.5761E-22 |
| PAGE1   | ENSG00000068985 | protein_coding | 0.94644784 | 1.50790701 | 0.6885023  | 2.19012633 | 0.02851508 | 0.03997552 |
| PITX1   | ENSG00000069011 | protein_coding | 83.1800861 | 3.64993537 | 0.36501073 | 9.9995289  | 1.5312E-23 | 1.0802E-22 |
| CLEC2D  | ENSG00000069493 | protein_coding | 864.811759 | 2.55023099 | 0.12172516 | 20.9507301 | 1.8478E-97 | 2.5285E-95 |
| DRD4    | ENSG00000069696 | protein_coding | 50.5756172 | 1.97842589 | 0.1514936  | 13.059468  | 5.6119E-39 | 8.3987E-38 |
| PLA2G10 | ENSG00000069764 | protein_coding | 7.41950392 | 1.14362075 | 0.15192212 | 7.5276778  | 5.1651E-14 | 2.0771E-13 |
| FSTL3   | ENSG00000070404 | protein_coding | 5924.68359 | 1.74829479 | 0.15035214 | 11.6280005 | 2.9697E-31 | 3.1267E-30 |
| CHAT    | ENSG00000070748 | protein_coding | 7.48540539 | 5.20587829 | 0.61069689 | 8.52448799 | 1.5349E-17 | 7.7489E-17 |
| MAP4K4  | ENSG00000071054 | protein_coding | 8594.14362 | 1.19394204 | 0.07030011 | 16.9835016 | 1.088E-64  | 4.3218E-63 |
| MS4A12  | ENSG00000071203 | protein_coding | 0.72096237 | 1.77517902 | 0.55406779 | 3.20390222 | 0.00135579 | 0.00225551 |
| VASH1   | ENSG00000071246 | protein_coding | 3057.58712 | 2.16271092 | 0.09770914 | 22.1341715 | 1.482E-108 | 3.006E-106 |
| TRIP13  | ENSG00000071539 | protein_coding | 297.730262 | 1.76847931 | 0.11662301 | 15.1640681 | 6.1161E-52 | 1.5733E-50 |

|         |                 |                |            |            |            |            |            |            |
|---------|-----------------|----------------|------------|------------|------------|------------|------------|------------|
| SPP2    | ENSG00000072080 | protein_coding | 0.44382352 | 1.29942662 | 0.47593314 | 2.73027134 | 0.00632822 | 0.00973332 |
| ASIC4   | ENSG00000072182 | protein_coding | 8.45623853 | 2.16924972 | 0.23957723 | 9.05449054 | 1.3721E-19 | 7.8298E-19 |
| HMMR    | ENSG00000072571 | protein_coding | 225.339629 | 1.36104934 | 0.1425015  | 9.55112269 | 1.283E-21  | 8.181E-21  |
| CHFR    | ENSG00000072609 | protein_coding | 1320.43756 | 1.11223766 | 0.06348578 | 17.5194764 | 1.0176E-68 | 4.6693E-67 |
| P4HA2   | ENSG00000072682 | protein_coding | 6535.09149 | 1.26236149 | 0.10186606 | 12.3923654 | 2.8744E-35 | 3.6662E-34 |
| FCGR2B  | ENSG00000072694 | protein_coding | 579.433609 | 1.97988601 | 0.15351962 | 12.8966318 | 4.702E-38  | 6.7867E-37 |
| STK10   | ENSG00000072786 | protein_coding | 3197.08277 | 1.18016187 | 0.06481195 | 18.2090172 | 4.3773E-74 | 2.4531E-72 |
| ACAP1   | ENSG00000072818 | protein_coding | 916.462084 | 1.84074704 | 0.11566344 | 15.9146841 | 5.0119E-57 | 1.5256E-55 |
| SCARB1  | ENSG00000073060 | protein_coding | 13776.3526 | 4.06829782 | 0.13288483 | 30.615216  | 7.679E-206 | 2.347E-202 |
| MOV10L1 | ENSG00000073146 | protein_coding | 43.3773939 | 1.4206652  | 0.15457553 | 9.19075073 | 3.9011E-20 | 2.29E-19   |
| GSDMB   | ENSG00000073605 | protein_coding | 410.154027 | 1.87212816 | 0.16170996 | 11.5770739 | 5.3853E-31 | 5.5916E-30 |
| ADAM11  | ENSG00000073670 | protein_coding | 58.7221708 | 2.08352999 | 0.1509622  | 13.8016668 | 2.4903E-43 | 4.475E-42  |
| ABCB11  | ENSG00000073734 | protein_coding | 2.14901647 | 1.32124526 | 0.30396204 | 4.34674422 | 1.3817E-05 | 2.8369E-05 |
| DHRS9   | ENSG00000073737 | protein_coding | 107.570406 | 2.398538   | 0.16767535 | 14.3046546 | 2.0465E-46 | 4.1807E-45 |
| CD5L    | ENSG00000073754 | protein_coding | 146.881437 | 4.88517012 | 0.32408671 | 15.0736516 | 2.4139E-51 | 6.0238E-50 |
| TBX21   | ENSG00000073861 | protein_coding | 137.399553 | 2.45642947 | 0.1253748  | 19.5926897 | 1.7851E-85 | 1.5126E-83 |
| NOTCH3  | ENSG00000074181 | protein_coding | 18488.1816 | 1.32108671 | 0.11907651 | 11.0944355 | 1.335E-28  | 1.2348E-27 |
| PPP2R2C | ENSG00000074211 | protein_coding | 178.387724 | 2.22418972 | 0.2879318  | 7.72471013 | 1.1211E-14 | 4.7118E-14 |
| SNCB    | ENSG00000074317 | protein_coding | 6.28114746 | 3.26437572 | 0.38279505 | 8.5277375  | 1.4924E-17 | 7.5435E-17 |
| SCARF1  | ENSG00000074660 | protein_coding | 1817.18053 | 1.5216515  | 0.09155021 | 16.6209509 | 4.9147E-62 | 1.7684E-60 |
| MYDGF   | ENSG00000074842 | protein_coding | 4940.40802 | 1.23959581 | 0.07776107 | 15.9410843 | 3.286E-57  | 1.0123E-55 |
| GTSE1   | ENSG00000075218 | protein_coding | 197.21647  | 2.32876106 | 0.13927129 | 16.7210414 | 9.2096E-63 | 3.3992E-61 |
| GRAMD4  | ENSG00000075240 | protein_coding | 4863.89424 | 1.75627301 | 0.1152685  | 15.2363653 | 2.0285E-52 | 5.2863E-51 |
| ADD2    | ENSG00000075340 | protein_coding | 229.751652 | 2.70511274 | 0.20767732 | 13.0255567 | 8.756E-39  | 1.2965E-37 |
| FSCN1   | ENSG00000075618 | protein_coding | 5363.61505 | 1.54864127 | 0.10964088 | 14.1246707 | 2.6765E-45 | 5.2055E-44 |

|           |                 |                |            |            |            |            |            |            |
|-----------|-----------------|----------------|------------|------------|------------|------------|------------|------------|
| WDR62     | ENSG00000075702 | protein_coding | 162.281208 | 1.50400965 | 0.12325421 | 12.2025008 | 3.0142E-34 | 3.6583E-33 |
| SEC31B    | ENSG00000075826 | protein_coding | 439.226853 | 1.63170361 | 0.15972199 | 10.2158985 | 1.6831E-24 | 1.2531E-23 |
| ARHGAP15  | ENSG00000075884 | protein_coding | 867.777489 | 1.60840921 | 0.09843123 | 16.3404353 | 5.0888E-60 | 1.7241E-58 |
| TUBA3D    | ENSG00000075886 | protein_coding | 665.385234 | 6.49483248 | 0.31505881 | 20.6146669 | 2.0271E-94 | 2.4649E-92 |
| PAG1      | ENSG00000076641 | protein_coding | 2800.77901 | 1.723139   | 0.08869984 | 19.4266311 | 4.5955E-84 | 3.6701E-82 |
| ICAM3     | ENSG00000076662 | protein_coding | 155.413263 | 1.96569747 | 0.12974692 | 15.1502435 | 7.5486E-52 | 1.9299E-50 |
| MCAM      | ENSG00000076706 | protein_coding | 24428.636  | 2.0580988  | 0.10845235 | 18.9769862 | 2.6433E-80 | 1.8642E-78 |
| ARHGEF1   | ENSG00000076928 | protein_coding | 4881.34731 | 1.16633215 | 0.07755992 | 15.0378206 | 4.1499E-51 | 1.025E-49  |
| NMRK2     | ENSG00000077009 | protein_coding | 86.0917318 | 1.64320621 | 0.45901966 | 3.57981664 | 0.00034384 | 0.00061045 |
| DGKD      | ENSG00000077044 | protein_coding | 2703.85083 | 2.0977915  | 0.09124259 | 22.9913636 | 5.687E-117 | 1.417E-114 |
| ACTL6B    | ENSG00000077080 | protein_coding | 2.33158063 | 3.14204295 | 0.42186926 | 7.44790694 | 9.4833E-14 | 3.7463E-13 |
| NFKB2     | ENSG00000077150 | protein_coding | 4295.38599 | 1.21016561 | 0.08965437 | 13.4981212 | 1.6042E-41 | 2.6692E-40 |
| IL4R      | ENSG00000077238 | protein_coding | 4244.60925 | 1.45577389 | 0.0714913  | 20.3629523 | 3.5644E-92 | 3.9564E-90 |
| EXOSC5    | ENSG00000077348 | protein_coding | 1166.63432 | 1.31165911 | 0.09011193 | 14.5558881 | 5.3585E-48 | 1.1675E-46 |
| APBB1IP   | ENSG00000077420 | protein_coding | 3178.2392  | 2.41073486 | 0.13137433 | 18.3501216 | 3.2937E-75 | 1.9259E-73 |
| TYR       | ENSG00000077498 | protein_coding | 5.42674507 | 1.90404119 | 0.25955573 | 7.33577012 | 2.2045E-13 | 8.48E-13   |
| ACTN2     | ENSG00000077522 | protein_coding | 137.251349 | 1.51242779 | 0.2354432  | 6.42374809 | 1.3296E-10 | 4.1927E-10 |
| FKBP6     | ENSG00000077800 | protein_coding | 2.18290502 | 1.68479325 | 0.30669078 | 5.49345904 | 3.9414E-08 | 1.0184E-07 |
| SMC1B     | ENSG00000077935 | protein_coding | 20.4410083 | 2.29880826 | 0.18913706 | 12.1541928 | 5.4497E-34 | 6.5398E-33 |
| CST7      | ENSG00000077984 | protein_coding | 897.787572 | 3.11106799 | 0.16367026 | 19.008145  | 1.4603E-80 | 1.0378E-78 |
| LAMP3     | ENSG00000078081 | protein_coding | 347.462586 | 1.17091407 | 0.12372322 | 9.46398026 | 2.9644E-21 | 1.8544E-20 |
| FAP       | ENSG00000078098 | protein_coding | 377.038657 | 1.18472426 | 0.17845361 | 6.63883597 | 3.1617E-11 | 1.0461E-10 |
| ADCY2     | ENSG00000078295 | protein_coding | 313.013745 | 2.56789818 | 0.2405653  | 10.6744328 | 1.3407E-26 | 1.1219E-25 |
| EDN1      | ENSG00000078401 | protein_coding | 3577.02694 | 1.75901874 | 0.14705793 | 11.9614004 | 5.6599E-33 | 6.4767E-32 |
| ADCYAP1R1 | ENSG00000078549 | protein_coding | 30.9959891 | 1.80119109 | 0.22376624 | 8.04943189 | 8.3179E-16 | 3.7619E-15 |



|         |                 |                |            |            |            |            |            |            |
|---------|-----------------|----------------|------------|------------|------------|------------|------------|------------|
| FGF20   | ENSG00000078579 | protein_coding | 12.067395  | 2.10064684 | 0.19414878 | 10.8197788 | 2.7745E-27 | 2.4051E-26 |
| P2RY10  | ENSG00000078589 | protein_coding | 151.333325 | 1.92958462 | 0.17198346 | 11.2195938 | 3.2677E-29 | 3.1318E-28 |
| MYH7B   | ENSG00000078814 | protein_coding | 166.041432 | 1.1582057  | 0.14583819 | 7.94171739 | 1.994E-15  | 8.8171E-15 |
| BPIFB2  | ENSG00000078898 | protein_coding | 1.02914008 | 2.42274894 | 0.62630359 | 3.86832997 | 0.00010958 | 0.00020548 |
| TP73    | ENSG00000078900 | protein_coding | 85.7009171 | 3.05124552 | 0.17807733 | 17.1343847 | 8.2218E-66 | 3.3802E-64 |
| SLC1A3  | ENSG00000079215 | protein_coding | 1259.23793 | 2.71718809 | 0.1457736  | 18.6397823 | 1.5286E-77 | 9.8142E-76 |
| SP140   | ENSG00000079263 | protein_coding | 251.54574  | 1.78535462 | 0.14527056 | 12.2898582 | 1.0269E-34 | 1.2757E-33 |
| DUSP13  | ENSG00000079393 | protein_coding | 3.29432322 | 1.0175409  | 0.36671568 | 2.77474065 | 0.00552457 | 0.00855781 |
| SCGN    | ENSG00000079689 | protein_coding | 2194.83973 | 4.6572675  | 0.25938829 | 17.95481   | 4.4008E-72 | 2.2795E-70 |
| PTPRH   | ENSG00000080031 | protein_coding | 173.435452 | 2.5422016  | 0.29534726 | 8.60750028 | 7.4671E-18 | 3.8422E-17 |
| EPHA6   | ENSG00000080224 | protein_coding | 117.954101 | 1.38168064 | 0.23266183 | 5.93857883 | 2.875E-09  | 8.1728E-09 |
| COL5A3  | ENSG00000080573 | protein_coding | 2175.61239 | 3.53285032 | 0.13053133 | 27.0651516 | 2.533E-161 | 2.37E-158  |
| CPB2    | ENSG00000080618 | protein_coding | 5.92328159 | 1.41543517 | 0.26857195 | 5.27022704 | 1.3626E-07 | 3.3653E-07 |
| NDC80   | ENSG00000080986 | protein_coding | 244.823977 | 2.03474554 | 0.11468361 | 17.7422523 | 1.9784E-70 | 9.6381E-69 |
| CXCL2   | ENSG00000081041 | protein_coding | 623.401515 | 1.62521337 | 0.20381096 | 7.9741217  | 1.5347E-15 | 6.8395E-15 |
| CDH7    | ENSG00000081138 | protein_coding | 13.1646785 | 1.46658648 | 0.380557   | 3.85378928 | 0.0001163  | 0.0002175  |
| MEF2C   | ENSG00000081189 | protein_coding | 5230.59968 | 1.28101498 | 0.09381368 | 13.6548848 | 1.8879E-42 | 3.2657E-41 |
| PTPRC   | ENSG00000081237 | protein_coding | 4718.4012  | 1.82679983 | 0.13293882 | 13.7416584 | 5.7152E-43 | 1.0151E-41 |
| PKP1    | ENSG00000081277 | protein_coding | 562.830313 | 2.09642037 | 0.26461526 | 7.92252272 | 2.3274E-15 | 1.0242E-14 |
| IL12RB2 | ENSG00000081985 | protein_coding | 245.382046 | 2.61056215 | 0.26368621 | 9.90026044 | 4.1519E-23 | 2.8612E-22 |
| FYB1    | ENSG00000082074 | protein_coding | 2743.44354 | 1.67795292 | 0.13356095 | 12.5631997 | 3.3645E-36 | 4.4769E-35 |
| MPP4    | ENSG00000082126 | protein_coding | 11.3418393 | 1.16471866 | 0.18482647 | 6.30168763 | 2.9442E-10 | 9.0545E-10 |
| SEMA5B  | ENSG00000082684 | protein_coding | 8738.45466 | 3.88108476 | 0.13774937 | 28.1749727 | 1.185E-174 | 1.646E-171 |
| PLOD1   | ENSG00000083444 | protein_coding | 16363.0827 | 1.32109516 | 0.10006142 | 13.2028426 | 8.4486E-40 | 1.3031E-38 |
| P2RX5   | ENSG00000083454 | protein_coding | 43.5454069 | 1.89618471 | 0.19307648 | 9.82089953 | 9.1523E-23 | 6.1954E-22 |

|         |                 |                |            |            |            |            |            |            |
|---------|-----------------|----------------|------------|------------|------------|------------|------------|------------|
| EPYC    | ENSG00000083782 | protein_coding | 7.97990857 | 3.65750846 | 0.34811082 | 10.506736  | 8.0429E-26 | 6.4491E-25 |
| HAL     | ENSG00000084110 | protein_coding | 32.6691983 | 1.51614535 | 0.15456831 | 9.80890144 | 1.0308E-22 | 6.9636E-22 |
| NKAIN1  | ENSG00000084628 | protein_coding | 142.499759 | 4.01190582 | 0.21764253 | 18.4334646 | 7.08E-76   | 4.2593E-74 |
| APOB    | ENSG00000084674 | protein_coding | 1521.67247 | 4.18798297 | 0.2903834  | 14.4222534 | 3.749E-47  | 7.887E-46  |
| GCKR    | ENSG00000084734 | protein_coding | 21.6096042 | 1.69011548 | 0.29878678 | 5.65659386 | 1.5441E-08 | 4.1323E-08 |
| FCN1    | ENSG00000085265 | protein_coding | 681.337066 | 1.05678832 | 0.14158219 | 7.46413324 | 8.385E-14  | 3.3239E-13 |
| PILRA   | ENSG00000085514 | protein_coding | 676.962884 | 1.63615391 | 0.10343322 | 15.8184564 | 2.3211E-56 | 6.8914E-55 |
| TTC39A  | ENSG00000085831 | protein_coding | 2705.0351  | 1.1816565  | 0.1263615  | 9.35139671 | 8.6498E-21 | 5.2665E-20 |
| RAD54L  | ENSG00000085999 | protein_coding | 163.235887 | 2.48943647 | 0.15451242 | 16.1115618 | 2.1161E-58 | 6.7978E-57 |
| NME8    | ENSG00000086288 | protein_coding | 36.8618986 | 2.79591905 | 0.15038562 | 18.5916648 | 3.7534E-77 | 2.3831E-75 |
| SNX10   | ENSG00000086300 | protein_coding | 6376.34407 | 1.24278861 | 0.11008546 | 11.2893076 | 1.482E-29  | 1.4421E-28 |
| PPEF1   | ENSG00000086717 | protein_coding | 48.5734846 | 2.52399049 | 0.17833507 | 14.1530798 | 1.7875E-45 | 3.5063E-44 |
| LAT2    | ENSG00000086730 | protein_coding | 927.060849 | 2.14632695 | 0.10304624 | 20.8287748 | 2.3746E-96 | 3.1643E-94 |
| ACHE    | ENSG00000087085 | protein_coding | 317.604674 | 1.36620268 | 0.19327502 | 7.06869786 | 1.5639E-12 | 5.6831E-12 |
| BAX     | ENSG00000087088 | protein_coding | 2830.80104 | 1.22620226 | 0.06699574 | 18.3026899 | 7.8762E-75 | 4.5473E-73 |
| ADAMTS2 | ENSG00000087116 | protein_coding | 1705.52804 | 1.91079285 | 0.13665528 | 13.9825758 | 1.9915E-44 | 3.7461E-43 |
| CETP    | ENSG00000087237 | protein_coding | 618.891435 | 1.23429534 | 0.12388689 | 9.9630826  | 2.211E-23  | 1.5457E-22 |
| MT3     | ENSG00000087250 | protein_coding | 898.511365 | 3.33572355 | 0.29300885 | 11.3843781 | 5.0024E-30 | 4.9539E-29 |
| SH3BP2  | ENSG00000087266 | protein_coding | 9739.31224 | 1.66548101 | 0.08369187 | 19.9001533 | 4.0569E-88 | 3.8109E-86 |
| PTHLH   | ENSG00000087494 | protein_coding | 2540.06488 | 6.38818352 | 0.27720906 | 23.0446423 | 1.665E-117 | 4.193E-115 |
| CASS4   | ENSG00000087589 | protein_coding | 329.071571 | 1.22398216 | 0.1255257  | 9.75084947 | 1.8293E-22 | 1.2173E-21 |
| RFX2    | ENSG00000087903 | protein_coding | 789.88242  | 1.47358887 | 0.10613946 | 13.8835164 | 7.9734E-44 | 1.4638E-42 |
| GP6     | ENSG00000088053 | protein_coding | 44.8214816 | 2.24798778 | 0.18180418 | 12.3648847 | 4.0479E-35 | 5.1105E-34 |
| TPX2    | ENSG00000088325 | protein_coding | 820.722175 | 2.49348231 | 0.14510833 | 17.1835915 | 3.524E-66  | 1.4713E-64 |
| SMOX    | ENSG00000088826 | protein_coding | 1143.69561 | 1.11253356 | 0.10529268 | 10.5661056 | 4.279E-26  | 3.4797E-25 |

|         |                 |                |            |            |            |            |            |            |
|---------|-----------------|----------------|------------|------------|------------|------------|------------|------------|
| SIGLEC1 | ENSG00000088827 | protein_coding | 1336.77929 | 2.52900831 | 0.14641241 | 17.2731825 | 7.4896E-67 | 3.2057E-65 |
| SIRPG   | ENSG00000089012 | protein_coding | 249.965253 | 3.36337185 | 0.19320524 | 17.4082852 | 7.139E-68  | 3.1711E-66 |
| P2RX7   | ENSG00000089041 | protein_coding | 1052.17821 | 2.65953784 | 0.10456261 | 25.4348829 | 1.038E-142 | 5.406E-140 |
| OAS1    | ENSG00000089127 | protein_coding | 3545.52492 | 1.42908451 | 0.09449464 | 15.1234457 | 1.1345E-51 | 2.8685E-50 |
| RPLP0   | ENSG00000089157 | protein_coding | 73993.0042 | 1.04957549 | 0.08534922 | 12.2974233 | 9.351E-35  | 1.1633E-33 |
| RPH3A   | ENSG00000089169 | protein_coding | 22.9171079 | 1.39737577 | 0.17997453 | 7.76429738 | 8.2099E-15 | 3.4802E-14 |
| TBX5    | ENSG00000089225 | protein_coding | 22.3759449 | 6.18824303 | 0.44965    | 13.7623551 | 4.2931E-43 | 7.6457E-42 |
| FXYD5   | ENSG00000089327 | protein_coding | 4752.89619 | 1.76379692 | 0.10655671 | 16.5526593 | 1.5318E-61 | 5.4225E-60 |
| GRAMD1A | ENSG00000089351 | protein_coding | 3931.2165  | 1.30247015 | 0.06929521 | 18.7959623 | 8.1489E-79 | 5.4693E-77 |
| KCNH4   | ENSG00000089558 | protein_coding | 25.9342393 | 1.57371934 | 0.14606437 | 10.7741495 | 4.5598E-27 | 3.9099E-26 |
| GMIP    | ENSG00000089639 | protein_coding | 1126.42986 | 1.59386633 | 0.08788101 | 18.1366418 | 1.6374E-73 | 8.9998E-72 |
| BIRC5   | ENSG00000089685 | protein_coding | 438.479813 | 2.47046358 | 0.1575633  | 15.6791818 | 2.0994E-55 | 6.0528E-54 |
| LAG3    | ENSG00000089692 | protein_coding | 587.934556 | 3.55128614 | 0.20705776 | 17.1511856 | 6.1583E-66 | 2.5525E-64 |
| ARHGAP4 | ENSG00000089820 | protein_coding | 2357.71321 | 1.10250928 | 0.10075305 | 10.9426888 | 7.2031E-28 | 6.4304E-27 |
| RGS1    | ENSG00000090104 | protein_coding | 6840.23492 | 3.09383414 | 0.15230647 | 20.3132158 | 9.8256E-92 | 1.0573E-89 |
| ICAM1   | ENSG00000090339 | protein_coding | 5922.16112 | 1.3961255  | 0.11102538 | 12.5748316 | 2.9042E-36 | 3.8802E-35 |
| LYZ     | ENSG00000090382 | protein_coding | 10375.6396 | 2.43047554 | 0.16759444 | 14.5021253 | 1.1746E-47 | 2.5219E-46 |
| SI      | ENSG00000090402 | protein_coding | 0.90620832 | 2.24416057 | 0.48334303 | 4.64299767 | 3.4339E-06 | 7.4724E-06 |
| KIF4A   | ENSG00000090889 | protein_coding | 289.730145 | 2.2091063  | 0.13387812 | 16.5008762 | 3.6161E-61 | 1.2712E-59 |
| PLEKHG2 | ENSG00000090924 | protein_coding | 2991.83343 | 1.73699969 | 0.096033   | 18.0875299 | 3.996E-73  | 2.1627E-71 |
| DLL3    | ENSG00000090932 | protein_coding | 5.41750528 | 1.6259284  | 0.30280111 | 5.36962505 | 7.8901E-08 | 1.9918E-07 |
| DTX2    | ENSG00000091073 | protein_coding | 780.069475 | 1.30269095 | 0.07461376 | 17.4591238 | 2.934E-68  | 1.3225E-66 |
| NLRC4   | ENSG00000091106 | protein_coding | 254.118927 | 1.77716966 | 0.10460841 | 16.9887833 | 9.943E-65  | 3.96E-63   |
| SEL1L3  | ENSG00000091490 | protein_coding | 8784.60812 | 1.65574074 | 0.10708695 | 15.4616488 | 6.2966E-54 | 1.7253E-52 |
| TF      | ENSG00000091513 | protein_coding | 721.891184 | 3.98495218 | 0.3138594  | 12.6966156 | 6.1743E-37 | 8.5021E-36 |

|         |                 |                |            |            |            |            |            |            |
|---------|-----------------|----------------|------------|------------|------------|------------|------------|------------|
| NLRP1   | ENSG00000091592 | protein_coding | 1793.29236 | 1.18183939 | 0.10144068 | 11.6505473 | 2.2799E-31 | 2.4137E-30 |
| ORC6    | ENSG00000091651 | protein_coding | 120.866795 | 1.34511638 | 0.12453659 | 10.8009732 | 3.4057E-27 | 2.9368E-26 |
| RGS17   | ENSG00000091844 | protein_coding | 105.180787 | 1.53498942 | 0.17713638 | 8.66557978 | 4.4922E-18 | 2.3451E-17 |
| ANGPT2  | ENSG00000091879 | protein_coding | 6720.30508 | 3.10452268 | 0.13972383 | 22.2189922 | 2.251E-109 | 4.69E-107  |
| CD200   | ENSG00000091972 | protein_coding | 2276.02657 | 1.65916714 | 0.09641175 | 17.2091789 | 2.2662E-66 | 9.5308E-65 |
| CEBPE   | ENSG00000092067 | protein_coding | 7.07986216 | 1.51003252 | 0.15212981 | 9.92594734 | 3.2104E-23 | 2.2255E-22 |
| RPGRIP1 | ENSG00000092200 | protein_coding | 49.1629187 | 1.02841505 | 0.09283654 | 11.0776971 | 1.6096E-28 | 1.4807E-27 |
| SEMA6A  | ENSG00000092421 | protein_coding | 6218.36419 | 1.897041   | 0.11564431 | 16.4041016 | 1.7875E-60 | 6.1564E-59 |
| TBX15   | ENSG00000092607 | protein_coding | 360.694589 | 3.11618489 | 0.19016746 | 16.3865304 | 2.3869E-60 | 8.1898E-59 |
| CLSPN   | ENSG00000092853 | protein_coding | 125.423988 | 1.61503791 | 0.12282655 | 13.1489316 | 1.726E-39  | 2.6426E-38 |
| UNC13D  | ENSG00000092929 | protein_coding | 827.840359 | 2.16472628 | 0.11940365 | 18.1294823 | 1.8651E-73 | 1.0215E-71 |
| CDC45   | ENSG00000093009 | protein_coding | 144.951435 | 2.71458257 | 0.1323068  | 20.5173322 | 1.5076E-93 | 1.7766E-91 |
| VNN3    | ENSG00000093134 | protein_coding | 19.2323196 | 2.45143554 | 0.21872606 | 11.2077891 | 3.734E-29  | 3.5646E-28 |
| CDC6    | ENSG00000094804 | protein_coding | 289.048925 | 1.98866151 | 0.1252681  | 15.8752425 | 9.4047E-57 | 2.8344E-55 |
| SH2D3C  | ENSG00000095370 | protein_coding | 2670.14029 | 1.0861156  | 0.09972253 | 10.8913764 | 1.2671E-27 | 1.1166E-26 |
| PDE6C   | ENSG00000095464 | protein_coding | 29.6449487 | 1.72045057 | 0.14769445 | 11.6487151 | 2.3294E-31 | 2.4656E-30 |
| CYP26A1 | ENSG00000095596 | protein_coding | 13.710049  | 1.87944555 | 0.26864725 | 6.99596058 | 2.6345E-12 | 9.4121E-12 |
| MYO3A   | ENSG00000095777 | protein_coding | 610.680487 | 3.29627707 | 0.15297313 | 21.5480784 | 5.519E-103 | 9.37E-101  |
| TPSD1   | ENSG00000095917 | protein_coding | 51.7927683 | 1.2631356  | 0.25692948 | 4.91627346 | 8.8207E-07 | 2.0295E-06 |
| TREM2   | ENSG00000095970 | protein_coding | 1345.39075 | 4.24795857 | 0.14733807 | 28.8313715 | 8.677E-183 | 1.53E-179  |
| KCNK16  | ENSG00000095981 | protein_coding | 0.76046077 | 1.98295848 | 0.44406856 | 4.46543319 | 7.9907E-06 | 1.6784E-05 |
| NCR2    | ENSG00000096264 | protein_coding | 0.95394652 | 1.96988026 | 0.40599008 | 4.85204036 | 1.222E-06  | 2.773E-06  |
| MLN     | ENSG00000096395 | protein_coding | 1.07327285 | 2.28942057 | 0.34553628 | 6.6257024  | 3.456E-11  | 1.1399E-10 |
| IL12RB1 | ENSG00000096996 | protein_coding | 383.070042 | 2.58226326 | 0.1252849  | 20.6111294 | 2.1808E-94 | 2.6388E-92 |
| SCD     | ENSG00000099194 | protein_coding | 25302.8604 | 2.99635648 | 0.13617567 | 22.0036113 | 2.659E-107 | 5.188E-105 |

|          |                 |                |            |            |            |            |            |            |
|----------|-----------------|----------------|------------|------------|------------|------------|------------|------------|
| NRP1     | ENSG00000099250 | protein_coding | 25386.5737 | 1.05812535 | 0.08874524 | 11.9231781 | 8.9623E-33 | 1.0129E-31 |
| MYO9B    | ENSG00000099331 | protein_coding | 5017.09506 | 1.15867663 | 0.06314405 | 18.349736  | 3.3172E-75 | 1.9371E-73 |
| STX1B    | ENSG00000099365 | protein_coding | 198.6268   | 1.72232568 | 0.13904634 | 12.3867029 | 3.0847E-35 | 3.9224E-34 |
| HSD3B7   | ENSG00000099377 | protein_coding | 4249.08206 | 2.22275476 | 0.13794803 | 16.1129862 | 2.0679E-58 | 6.6476E-57 |
| MAGEB2   | ENSG00000099399 | protein_coding | 1.75994832 | 3.10889221 | 0.76257409 | 4.07683956 | 4.5652E-05 | 8.9128E-05 |
| EFNA2    | ENSG00000099617 | protein_coding | 7.77924202 | 1.72202723 | 0.3247079  | 5.30331171 | 1.1372E-07 | 2.8283E-07 |
| PRKY     | ENSG00000099725 | protein_coding | 322.864657 | 1.40171845 | 0.3260795  | 4.29870158 | 1.718E-05  | 3.4948E-05 |
| CDHR5    | ENSG00000099834 | protein_coding | 9793.39983 | 1.02302097 | 0.2067064  | 4.94914995 | 7.4538E-07 | 1.7268E-06 |
| SERPIND1 | ENSG00000099937 | protein_coding | 28.6802338 | 1.5741033  | 0.26703807 | 5.89467746 | 3.7541E-09 | 1.0568E-08 |
| MMP11    | ENSG00000099953 | protein_coding | 1010.16694 | 2.01859894 | 0.13005254 | 15.5214117 | 2.4852E-54 | 6.892E-53  |
| DERL3    | ENSG00000099958 | protein_coding | 601.728683 | 2.16068633 | 0.18503663 | 11.6770737 | 1.6694E-31 | 1.7793E-30 |
| OSM      | ENSG00000099985 | protein_coding | 216.723985 | 1.87765398 | 0.1789249  | 10.4940899 | 9.196E-26  | 7.3556E-25 |
| SEC14L3  | ENSG00000100012 | protein_coding | 4.91166069 | 3.83501204 | 0.34738118 | 11.0397806 | 2.4563E-28 | 2.2417E-27 |
| PPM1F    | ENSG00000100034 | protein_coding | 3936.34206 | 1.02447942 | 0.07337696 | 13.9618672 | 2.6636E-44 | 4.9818E-43 |
| CYTH4    | ENSG00000100055 | protein_coding | 1424.91813 | 1.94935775 | 0.10970345 | 17.7693392 | 1.2212E-70 | 6.0325E-69 |
| MFNG     | ENSG00000100060 | protein_coding | 1376.78036 | 1.19788429 | 0.08626873 | 13.8854977 | 7.756E-44  | 1.425E-42  |
| SH3BP1   | ENSG00000100092 | protein_coding | 687.006709 | 1.64465368 | 0.10257142 | 16.0342294 | 7.3692E-58 | 2.3297E-56 |
| SEZ6L    | ENSG00000100095 | protein_coding | 28.2292941 | 2.0093329  | 0.23837539 | 8.42928005 | 3.478E-17  | 1.7182E-16 |
| LGALS1   | ENSG00000100097 | protein_coding | 15118.3378 | 2.14282482 | 0.12400127 | 17.280668  | 6.5782E-67 | 2.8235E-65 |
| CRYBB1   | ENSG00000100122 | protein_coding | 41.8826468 | 1.46742661 | 0.12263529 | 11.9657775 | 5.3692E-33 | 6.1517E-32 |
| POLR2F   | ENSG00000100142 | protein_coding | 17.7347064 | 1.6727557  | 0.13749434 | 12.1659965 | 4.7165E-34 | 5.6778E-33 |
| SLC16A8  | ENSG00000100156 | protein_coding | 47.9468066 | 2.05725961 | 0.15613223 | 13.1763931 | 1.1999E-39 | 1.8471E-38 |
| CENPM    | ENSG00000100162 | protein_coding | 169.605168 | 2.20436678 | 0.13193158 | 16.7084088 | 1.1383E-62 | 4.188E-61  |
| SLC5A1   | ENSG00000100170 | protein_coding | 3024.174   | 2.09931179 | 0.25659244 | 8.18150276 | 2.8033E-16 | 1.3061E-15 |
| SLC5A4   | ENSG00000100191 | protein_coding | 109.20017  | 1.77111109 | 0.14536819 | 12.1836221 | 3.8002E-34 | 4.594E-33  |

|          |                 |                |            |            |            |            |            |            |
|----------|-----------------|----------------|------------|------------|------------|------------|------------|------------|
| CYP2D6   | ENSG00000100197 | protein_coding | 58.5985983 | 1.23633554 | 0.16181459 | 7.64044518 | 2.1647E-14 | 8.9182E-14 |
| RASL10A  | ENSG00000100276 | protein_coding | 44.1003517 | 2.03734134 | 0.14748456 | 13.8139299 | 2.1005E-43 | 3.7924E-42 |
| CHKB     | ENSG00000100288 | protein_coding | 297.838255 | 1.7096941  | 0.13566958 | 12.6018971 | 2.0613E-36 | 2.7734E-35 |
| HMOX1    | ENSG00000100292 | protein_coding | 16370.0316 | 2.31566541 | 0.13315393 | 17.3908909 | 9.6719E-68 | 4.2632E-66 |
| MCM5     | ENSG00000100297 | protein_coding | 2796.52422 | 1.05529782 | 0.06276273 | 16.8140838 | 1.9244E-63 | 7.315E-62  |
| APOBEC3H | ENSG00000100298 | protein_coding | 103.842056 | 2.9020562  | 0.14359044 | 20.2106509 | 7.8901E-91 | 8.1461E-89 |
| RASD2    | ENSG00000100302 | protein_coding | 809.552792 | 2.87757691 | 0.13657378 | 21.0697615 | 1.5069E-98 | 2.1386E-96 |
| ACR      | ENSG00000100312 | protein_coding | 33.7840208 | 1.2800546  | 0.14310125 | 8.94509699 | 3.7162E-19 | 2.0667E-18 |
| CABP7    | ENSG00000100314 | protein_coding | 15.302264  | 1.09352456 | 0.13963603 | 7.83124945 | 4.8305E-15 | 2.0804E-14 |
| PNPLA5   | ENSG00000100341 | protein_coding | 2.11594653 | 2.82430401 | 0.50090887 | 5.63835893 | 1.7168E-08 | 4.5753E-08 |
| APOL1    | ENSG00000100342 | protein_coding | 20238.6373 | 2.05353305 | 0.17675567 | 11.6179192 | 3.3418E-31 | 3.5079E-30 |
| CACNA1I  | ENSG00000100346 | protein_coding | 21.3041723 | 1.80017815 | 0.20430561 | 8.81120282 | 1.2381E-18 | 6.6827E-18 |
| GRAP2    | ENSG00000100351 | protein_coding | 218.068848 | 1.67587036 | 0.11907595 | 14.0739618 | 5.4905E-45 | 1.054E-43  |
| NCF4     | ENSG00000100365 | protein_coding | 654.311607 | 2.00858042 | 0.11482642 | 17.4923191 | 1.6395E-68 | 7.4559E-67 |
| CSF2RB   | ENSG00000100368 | protein_coding | 931.015761 | 1.33822118 | 0.10353389 | 12.9254412 | 3.2344E-38 | 4.6935E-37 |
| FAM118A  | ENSG00000100376 | protein_coding | 911.049392 | 1.07796357 | 0.10424278 | 10.3408945 | 4.6022E-25 | 3.5297E-24 |
| IL2RB    | ENSG00000100385 | protein_coding | 1506.39772 | 2.99256481 | 0.13302544 | 22.4961847 | 4.523E-112 | 1.011E-109 |
| MLC1     | ENSG00000100427 | protein_coding | 55.9550272 | 2.19388294 | 0.13584729 | 16.1496263 | 1.1425E-58 | 3.704E-57  |
| HDAC10   | ENSG00000100429 | protein_coding | 467.110183 | 1.50850621 | 0.11076857 | 13.6185399 | 3.1072E-42 | 5.3168E-41 |
| GZMH     | ENSG00000100450 | protein_coding | 390.269142 | 2.97757097 | 0.15036587 | 19.8021729 | 2.8513E-87 | 2.5831E-85 |
| GZMB     | ENSG00000100453 | protein_coding | 335.366222 | 2.55670925 | 0.14725186 | 17.362832  | 1.5775E-67 | 6.9067E-66 |
| POLE2    | ENSG00000100479 | protein_coding | 118.814919 | 1.33952873 | 0.09421077 | 14.2184248 | 7.042E-46  | 1.4029E-44 |
| PYGL     | ENSG00000100504 | protein_coding | 4051.47157 | 1.99938417 | 0.0979789  | 20.4062735 | 1.4708E-92 | 1.6607E-90 |
| TRIM9    | ENSG00000100505 | protein_coding | 921.541685 | 2.83164201 | 0.14006725 | 20.216303  | 7.0363E-91 | 7.281E-89  |
| CDKN3    | ENSG00000100526 | protein_coding | 148.332618 | 1.89026017 | 0.13711171 | 13.7862778 | 3.0826E-43 | 5.5199E-42 |



|         |                 |                |            |            |            |            |            |            |
|---------|-----------------|----------------|------------|------------|------------|------------|------------|------------|
| LRRC74A | ENSG00000100565 | protein_coding | 4.32474312 | 1.29217225 | 0.20116954 | 6.4232998  | 1.3335E-10 | 4.2037E-10 |
| RIN3    | ENSG00000100599 | protein_coding | 2175.78573 | 1.40556909 | 0.08090607 | 17.3728507 | 1.3248E-67 | 5.8114E-66 |
| ASB2    | ENSG00000100628 | protein_coding | 225.740832 | 1.43341849 | 0.15733124 | 9.11083224 | 8.1752E-20 | 4.7235E-19 |
| SLC10A1 | ENSG00000100652 | protein_coding | 7.79858541 | 1.80771621 | 0.25145845 | 7.18892612 | 6.5303E-13 | 2.433E-12  |
| MMP9    | ENSG00000100985 | protein_coding | 1368.06001 | 3.75915505 | 0.23700824 | 15.8608624 | 1.1826E-56 | 3.5478E-55 |
| VSX1    | ENSG00000100987 | protein_coding | 28.2994706 | 3.20587328 | 0.27921467 | 11.481751  | 1.6295E-30 | 1.6544E-29 |
| PROCR   | ENSG00000101000 | protein_coding | 2086.87579 | 1.58535062 | 0.10541152 | 15.0396336 | 4.0378E-51 | 9.9836E-50 |
| CD40    | ENSG00000101017 | protein_coding | 2993.72492 | 1.82077802 | 0.07704963 | 23.6312356 | 1.841E-123 | 5.701E-121 |
| MYBL2   | ENSG00000101057 | protein_coding | 378.690385 | 3.4014482  | 0.18144409 | 18.7465358 | 2.0662E-78 | 1.3687E-76 |
| SLA2    | ENSG00000101082 | protein_coding | 301.577281 | 2.90305261 | 0.14865981 | 19.5281607 | 6.3278E-85 | 5.274E-83  |
| NFATC2  | ENSG00000101096 | protein_coding | 1543.73255 | 1.16193927 | 0.09334131 | 12.4482849 | 1.4288E-35 | 1.8503E-34 |
| PABPC1L | ENSG00000101104 | protein_coding | 1113.2969  | 2.21273393 | 0.17277117 | 12.80731   | 1.4922E-37 | 2.1112E-36 |
| SALL4   | ENSG00000101115 | protein_coding | 39.0490131 | 1.85163298 | 0.2421217  | 7.64752997 | 2.0488E-14 | 8.4519E-14 |
| CTSZ    | ENSG00000101160 | protein_coding | 18562.6782 | 1.26793506 | 0.09195897 | 13.7880519 | 3.0077E-43 | 5.3879E-42 |
| SLC17A9 | ENSG00000101194 | protein_coding | 596.625168 | 3.34533845 | 0.18446806 | 18.1350556 | 1.6853E-73 | 9.2521E-72 |
| BIRC7   | ENSG00000101197 | protein_coding | 749.862373 | 7.04918428 | 0.30556787 | 23.0691283 | 9.455E-118 | 2.421E-115 |
| EEF1A2  | ENSG00000101210 | protein_coding | 469.834303 | 1.30437488 | 0.30952702 | 4.21409051 | 2.5079E-05 | 5.0266E-05 |
| PTK6    | ENSG00000101213 | protein_coding | 150.656368 | 1.02621257 | 0.20203225 | 5.07944936 | 3.7853E-07 | 9.0048E-07 |
| TRIB3   | ENSG00000101255 | protein_coding | 3341.18699 | 3.12372442 | 0.16546006 | 18.8790238 | 1.6969E-79 | 1.1593E-77 |
| RASSF2  | ENSG00000101265 | protein_coding | 3013.17069 | 2.1809585  | 0.10774069 | 20.2426629 | 4.1228E-91 | 4.3051E-89 |
| RSPO4   | ENSG00000101282 | protein_coding | 37.8135079 | 2.19581061 | 0.25319932 | 8.67226109 | 4.2362E-18 | 2.2153E-17 |
| SIRPB1  | ENSG00000101307 | protein_coding | 351.277841 | 2.65832876 | 0.1669276  | 15.9250402 | 4.2474E-57 | 1.2989E-55 |
| PLCB4   | ENSG00000101333 | protein_coding | 1625.16745 | 1.0855442  | 0.15517967 | 6.99540195 | 2.645E-12  | 9.4482E-12 |
| HCK     | ENSG00000101336 | protein_coding | 1385.97274 | 2.03496074 | 0.10854487 | 18.7476463 | 2.0235E-78 | 1.3443E-76 |
| SAMHD1  | ENSG00000101347 | protein_coding | 6778.51896 | 1.40993019 | 0.09891078 | 14.2545655 | 4.1991E-46 | 8.4425E-45 |

|         |                 |                |            |            |            |            |            |            |
|---------|-----------------|----------------|------------|------------|------------|------------|------------|------------|
| E2F1    | ENSG00000101412 | protein_coding | 360.204677 | 2.18185297 | 0.1119208  | 19.4946156 | 1.2197E-84 | 1.0038E-82 |
| ASIP    | ENSG00000101440 | protein_coding | 23.9532363 | 1.56487995 | 0.22310012 | 7.01424974 | 2.3119E-12 | 8.2873E-12 |
| CST4    | ENSG00000101441 | protein_coding | 1.07664769 | 1.62198693 | 0.60777929 | 2.66871041 | 0.00761431 | 0.01158395 |
| CELF4   | ENSG00000101489 | protein_coding | 86.6975569 | 1.03945022 | 0.16971855 | 6.12455265 | 9.0939E-10 | 2.6947E-09 |
| H2BW2   | ENSG00000101812 | protein_coding | 0.45461328 | 1.14023697 | 0.40430246 | 2.8202573  | 0.00479852 | 0.00748575 |
| VSIG1   | ENSG00000101842 | protein_coding | 221.42653  | 3.94731155 | 0.18396011 | 21.4574319 | 3.892E-102 | 6.327E-100 |
| RHOXF1  | ENSG00000101883 | protein_coding | 17.9776885 | 1.64593858 | 0.18930888 | 8.69446027 | 3.4848E-18 | 1.8308E-17 |
| GUCY2F  | ENSG00000101890 | protein_coding | 1.11402749 | 1.92727746 | 0.37563048 | 5.13078036 | 2.8854E-07 | 6.9361E-07 |
| TLR8    | ENSG00000101916 | protein_coding | 399.10755  | 2.11530875 | 0.15955285 | 13.2577307 | 4.0703E-40 | 6.3724E-39 |
| ABCD1   | ENSG00000101986 | protein_coding | 1547.89481 | 1.03045028 | 0.0746629  | 13.80137   | 2.5005E-43 | 4.4917E-42 |
| CACNA1F | ENSG00000102001 | protein_coding | 107.782903 | 2.26506751 | 0.17966703 | 12.6070294 | 1.9314E-36 | 2.5994E-35 |
| PLP2    | ENSG00000102007 | protein_coding | 4968.39791 | 1.14182794 | 0.12469987 | 9.15660893 | 5.3554E-20 | 3.1277E-19 |
| BMX     | ENSG00000102010 | protein_coding | 161.223404 | 1.50983422 | 0.13899511 | 10.8624987 | 1.7392E-27 | 1.5189E-26 |
| PIM2    | ENSG00000102096 | protein_coding | 1688.69957 | 1.2602791  | 0.13647838 | 9.23427659 | 2.6004E-20 | 1.5415E-19 |
| TAZ     | ENSG00000102125 | protein_coding | 1381.53879 | 1.09844672 | 0.08187654 | 13.4158912 | 4.8803E-41 | 7.9502E-40 |
| RAB40AL | ENSG00000102128 | protein_coding | 4.18858899 | 1.47673931 | 0.21532854 | 6.85807528 | 6.9794E-12 | 2.4196E-11 |
| GATA1   | ENSG00000102145 | protein_coding | 7.99661077 | 1.61940593 | 0.19798724 | 8.17934489 | 2.8539E-16 | 1.3291E-15 |
| PHEX    | ENSG00000102174 | protein_coding | 133.987067 | 1.2862222  | 0.15904662 | 8.08707661 | 6.1114E-16 | 2.7856E-15 |
| BRS3    | ENSG00000102239 | protein_coding | 11.9245676 | 1.94287032 | 0.40253444 | 4.82659396 | 1.3889E-06 | 3.1353E-06 |
| CD40LG  | ENSG00000102245 | protein_coding | 102.750731 | 1.47877624 | 0.14650858 | 10.0934446 | 5.906E-24  | 4.2582E-23 |
| TIMP1   | ENSG00000102265 | protein_coding | 24668.6812 | 2.05932215 | 0.14786584 | 13.9269632 | 4.3444E-44 | 8.0661E-43 |
| GABRE   | ENSG00000102287 | protein_coding | 1476.74698 | 2.92693265 | 0.18027594 | 16.2358475 | 2.8134E-59 | 9.3117E-58 |
| KLF8    | ENSG00000102349 | protein_coding | 1206.84426 | 1.19166123 | 0.10382062 | 11.4780788 | 1.7002E-30 | 1.725E-29  |
| CENPI   | ENSG00000102384 | protein_coding | 86.8669694 | 1.59767899 | 0.12249142 | 13.043191  | 6.9487E-39 | 1.0335E-37 |
| RUBCNL  | ENSG00000102445 | protein_coding | 237.769501 | 1.4886674  | 0.12097633 | 12.3054433 | 8.467E-35  | 1.055E-33  |

|             |                 |                |            |            |            |            |            |            |
|-------------|-----------------|----------------|------------|------------|------------|------------|------------|------------|
| FGF14       | ENSG00000102466 | protein_coding | 238.434151 | 1.13954752 | 0.18639558 | 6.11359725 | 9.741E-10  | 2.8796E-09 |
| TNFSF13B    | ENSG00000102524 | protein_coding | 917.266012 | 2.50593289 | 0.14550366 | 17.2224736 | 1.8012E-66 | 7.5961E-65 |
| FLT1        | ENSG00000102755 | protein_coding | 29372.9655 | 1.86902196 | 0.12402825 | 15.0693243 | 2.5774E-51 | 6.4211E-50 |
| RGCC        | ENSG00000102760 | protein_coding | 4686.05345 | 1.58924118 | 0.11373813 | 13.9728094 | 2.2843E-44 | 4.2846E-43 |
| MSLN        | ENSG00000102854 | protein_coding | 998.905368 | 1.30013716 | 0.32367601 | 4.01678572 | 5.8997E-05 | 0.00011369 |
| TRADD       | ENSG00000102871 | protein_coding | 2243.14501 | 1.44155991 | 0.06933218 | 20.7920761 | 5.1054E-96 | 6.6299E-94 |
| HSF4        | ENSG00000102878 | protein_coding | 4187.55865 | 5.69423433 | 0.18961103 | 30.0311338 | 3.851E-198 | 8.405E-195 |
| CORO1A      | ENSG00000102879 | protein_coding | 3728.55399 | 2.41871089 | 0.12669788 | 19.0903819 | 3.0354E-81 | 2.2122E-79 |
| CENPT       | ENSG00000102901 | protein_coding | 1529.62939 | 1.16374467 | 0.0937429  | 12.4142172 | 2.1882E-35 | 2.8105E-34 |
| CBLN1       | ENSG00000102924 | protein_coding | 58.8607334 | 2.08794348 | 0.24978365 | 8.35900776 | 6.3248E-17 | 3.0726E-16 |
| CCL22       | ENSG00000102962 | protein_coding | 107.855496 | 1.0811095  | 0.17245003 | 6.26911753 | 3.631E-10  | 1.1099E-09 |
| NME3        | ENSG00000103024 | protein_coding | 2190.25518 | 1.03477836 | 0.10857704 | 9.53036095 | 1.5674E-21 | 9.9474E-21 |
| FOXF1       | ENSG00000103241 | protein_coding | 442.282181 | 1.36215368 | 0.12840567 | 10.6082053 | 2.7294E-26 | 2.2419E-25 |
| HAGHL       | ENSG00000103253 | protein_coding | 385.812995 | 1.54076287 | 0.21740726 | 7.08698919 | 1.3706E-12 | 5.0004E-12 |
| MEFV        | ENSG00000103313 | protein_coding | 113.631613 | 2.24519635 | 0.14002686 | 16.0340405 | 7.3916E-58 | 2.3352E-56 |
| CAPN15      | ENSG00000103326 | protein_coding | 2914.06153 | 1.29668699 | 0.0793081  | 16.3499942 | 4.3502E-60 | 1.4805E-58 |
| AQP8        | ENSG00000103375 | protein_coding | 5.01262504 | 2.40908476 | 0.25157255 | 9.57610349 | 1.0078E-21 | 6.4674E-21 |
| CORO7-PAM16 | ENSG00000103426 | protein_coding | 2.76945713 | 1.25875677 | 0.18556147 | 6.7835028  | 1.173E-11  | 3.9945E-11 |
| PYCARD      | ENSG00000103490 | protein_coding | 900.036475 | 2.06483459 | 0.13266789 | 15.5639368 | 1.2798E-54 | 3.6014E-53 |
| STX4        | ENSG00000103496 | protein_coding | 3255.04833 | 1.16302893 | 0.06371071 | 18.2548419 | 1.8936E-74 | 1.0783E-72 |
| IL21R       | ENSG00000103522 | protein_coding | 317.556667 | 2.60132284 | 0.14564789 | 17.8603535 | 2.4011E-71 | 1.2189E-69 |
| AQP9        | ENSG00000103569 | protein_coding | 751.36226  | 3.37447643 | 0.24996379 | 13.4998609 | 1.5667E-41 | 2.6088E-40 |
| RASL12      | ENSG00000103710 | protein_coding | 1039.33618 | 1.23492713 | 0.11438946 | 10.7958118 | 3.6026E-27 | 3.1031E-26 |
| ACSBG1      | ENSG00000103740 | protein_coding | 40.7254459 | 1.57523404 | 0.2024401  | 7.78123513 | 7.182E-15  | 3.0558E-14 |
| IGDCC4      | ENSG00000103742 | protein_coding | 382.868078 | 1.41338796 | 0.25075036 | 5.63663383 | 1.7341E-08 | 4.6192E-08 |

|          |                 |                |            |            |            |            |            |            |
|----------|-----------------|----------------|------------|------------|------------|------------|------------|------------|
| CD276    | ENSG00000103855 | protein_coding | 4166.01737 | 1.19856975 | 0.07216234 | 16.609352  | 5.9634E-62 | 2.1374E-60 |
| TGM5     | ENSG00000104055 | protein_coding | 16.185162  | 2.46978455 | 0.30668049 | 8.05328228 | 8.0603E-16 | 3.6493E-15 |
| SCG3     | ENSG00000104112 | protein_coding | 36.5766243 | 1.65629726 | 0.2702816  | 6.12804295 | 8.8967E-10 | 2.638E-09  |
| OIP5     | ENSG00000104147 | protein_coding | 56.3365854 | 1.5647204  | 0.10442228 | 14.984545  | 9.2658E-51 | 2.2617E-49 |
| PDGFRL   | ENSG00000104213 | protein_coding | 226.814945 | 1.12916809 | 0.1968206  | 5.73704221 | 9.6344E-09 | 2.62E-08   |
| EYA1     | ENSG00000104313 | protein_coding | 99.296055  | 1.5004779  | 0.28193478 | 5.32207457 | 1.0259E-07 | 2.562E-07  |
| TRPA1    | ENSG00000104321 | protein_coding | 377.849983 | 3.7401191  | 0.18538959 | 20.1743744 | 1.6443E-90 | 1.675E-88  |
| NDRG1    | ENSG00000104419 | protein_coding | 125433.602 | 1.32788318 | 0.09748434 | 13.6215026 | 2.9836E-42 | 5.1092E-41 |
| IL7      | ENSG00000104432 | protein_coding | 292.773269 | 1.16914191 | 0.0910174  | 12.8452572 | 9.1447E-38 | 1.3035E-36 |
| STMN2    | ENSG00000104435 | protein_coding | 36.6449665 | 3.77934456 | 0.36272056 | 10.4194385 | 2.0214E-25 | 1.5854E-24 |
| ANXA13   | ENSG00000104537 | protein_coding | 1215.43443 | 1.80506472 | 0.2323053  | 7.77022625 | 7.8346E-15 | 3.3242E-14 |
| SLC39A14 | ENSG00000104635 | protein_coding | 18981.0341 | 1.69648522 | 0.13897984 | 12.2066999 | 2.8627E-34 | 3.479E-33  |
| KCNN4    | ENSG00000104783 | protein_coding | 163.225535 | 1.55475553 | 0.15976704 | 9.73139124 | 2.2154E-22 | 1.4672E-21 |
| MAP4K1   | ENSG00000104814 | protein_coding | 561.383486 | 2.38326857 | 0.13697136 | 17.3997584 | 8.2852E-68 | 3.666E-66  |
| TUBB4A   | ENSG00000104833 | protein_coding | 615.978859 | 1.35454957 | 0.25012526 | 5.41548481 | 6.1123E-08 | 1.5568E-07 |
| KCNA7    | ENSG00000104848 | protein_coding | 3.46021855 | 1.98273528 | 0.28112209 | 7.05293292 | 1.7519E-12 | 6.3383E-12 |
| RELB     | ENSG00000104856 | protein_coding | 1463.33395 | 1.10759081 | 0.07683486 | 14.415213  | 4.1516E-47 | 8.7219E-46 |
| CLASRP   | ENSG00000104859 | protein_coding | 1561.86278 | 1.2013333  | 0.09630601 | 12.4741255 | 1.0333E-35 | 1.3446E-34 |
| PPP1R13L | ENSG00000104881 | protein_coding | 2792.80522 | 1.59279935 | 0.09997619 | 15.9317876 | 3.813E-57  | 1.17E-55   |
| CD37     | ENSG00000104894 | protein_coding | 1586.54395 | 2.13005311 | 0.11447605 | 18.6069753 | 2.821E-77  | 1.7986E-75 |
| AMH      | ENSG00000104899 | protein_coding | 52.4904523 | 2.68516763 | 0.23163035 | 11.5924688 | 4.4997E-31 | 4.6933E-30 |
| LYL1     | ENSG00000104903 | protein_coding | 410.40352  | 1.08897925 | 0.10121469 | 10.7591025 | 5.369E-27  | 4.5841E-26 |
| TRMT1    | ENSG00000104907 | protein_coding | 1644.28488 | 1.16276159 | 0.07861464 | 14.7906499 | 1.6832E-49 | 3.8998E-48 |
| RETN     | ENSG00000104918 | protein_coding | 14.1276477 | 2.66319772 | 0.23721457 | 11.2269566 | 3.0066E-29 | 2.8864E-28 |
| RSPH6A   | ENSG00000104941 | protein_coding | 3.69963003 | 1.09114556 | 0.3430233  | 3.18096634 | 0.00146785 | 0.00243161 |

|         |                 |                |            |            |            |            |            |            |
|---------|-----------------|----------------|------------|------------|------------|------------|------------|------------|
| IL4I1   | ENSG00000104951 | protein_coding | 907.230209 | 2.11173988 | 0.14455819 | 14.6082337 | 2.4889E-48 | 5.5064E-47 |
| NOVA2   | ENSG00000104967 | protein_coding | 915.860244 | 1.14919976 | 0.11012113 | 10.4357791 | 1.7021E-25 | 1.3411E-24 |
| LILRB1  | ENSG00000104972 | protein_coding | 847.061731 | 2.91089444 | 0.10962918 | 26.5521856 | 2.423E-155 | 2.057E-152 |
| LILRA1  | ENSG00000104974 | protein_coding | 175.771909 | 1.51195325 | 0.1094838  | 13.8098353 | 2.2234E-43 | 4.008E-42  |
| ASF1B   | ENSG00000105011 | protein_coding | 384.053516 | 2.15281262 | 0.1201151  | 17.9229138 | 7.8127E-72 | 4.015E-70  |
| TNNT1   | ENSG00000105048 | protein_coding | 85.0436298 | 4.72543186 | 0.32196643 | 14.6767844 | 9.0795E-49 | 2.0463E-47 |
| RASAL3  | ENSG00000105122 | protein_coding | 963.891651 | 2.66029099 | 0.11046249 | 24.083206  | 3.749E-128 | 1.332E-125 |
| SLC1A6  | ENSG00000105143 | protein_coding | 15.6166748 | 2.42900868 | 0.3704939  | 6.55613679 | 5.522E-11  | 1.7925E-10 |
| EBI3    | ENSG00000105246 | protein_coding | 330.169036 | 2.29344197 | 0.13136349 | 17.4587471 | 2.9535E-68 | 1.33E-66   |
| OVOL3   | ENSG00000105261 | protein_coding | 3.09932864 | 2.01573254 | 0.28086951 | 7.17675812 | 7.1384E-13 | 2.6533E-12 |
| BBC3    | ENSG00000105327 | protein_coding | 587.519549 | 1.70228175 | 0.09438333 | 18.0358311 | 1.0195E-72 | 5.4217E-71 |
| TGFB1   | ENSG00000105329 | protein_coding | 7569.05878 | 1.56719957 | 0.09450952 | 16.5824512 | 9.3343E-62 | 3.3273E-60 |
| CEACAM4 | ENSG00000105352 | protein_coding | 38.8443611 | 1.83151317 | 0.1631184  | 11.2281211 | 2.9672E-29 | 2.8492E-28 |
| SIGLEC8 | ENSG00000105366 | protein_coding | 457.480415 | 5.06469793 | 0.17655579 | 28.6861054 | 5.687E-181 | 9.655E-178 |
| CD79A   | ENSG00000105369 | protein_coding | 283.923747 | 1.40150495 | 0.23409642 | 5.98687045 | 2.1392E-09 | 6.15E-09   |
| LIM2    | ENSG00000105370 | protein_coding | 3.28501449 | 3.1880221  | 0.29611934 | 10.7660043 | 4.9815E-27 | 4.2612E-26 |
| RPS19   | ENSG00000105372 | protein_coding | 41314.5833 | 1.47621121 | 0.10056988 | 14.6784625 | 8.8576E-49 | 1.9982E-47 |
| NKG7    | ENSG00000105374 | protein_coding | 1628.58922 | 3.48008011 | 0.16607643 | 20.9546901 | 1.7003E-97 | 2.3337E-95 |
| CD33    | ENSG00000105383 | protein_coding | 345.076536 | 1.93196968 | 0.11147058 | 17.3316548 | 2.7141E-67 | 1.1838E-65 |
| CRX     | ENSG00000105392 | protein_coding | 5.76552535 | 2.90169289 | 0.344991   | 8.41092335 | 4.068E-17  | 2.0008E-16 |
| SULT2A1 | ENSG00000105398 | protein_coding | 3.69360105 | 3.01934878 | 0.46060004 | 6.55525075 | 5.5548E-11 | 1.8026E-10 |
| ATP1A3  | ENSG00000105409 | protein_coding | 116.568319 | 2.03961091 | 0.20331267 | 10.0318927 | 1.1038E-23 | 7.8473E-23 |
| MEIS3   | ENSG00000105419 | protein_coding | 412.414168 | 1.444658   | 0.13373913 | 10.8020593 | 3.3657E-27 | 2.9029E-26 |
| ZNRF4   | ENSG00000105428 | protein_coding | 0.65760545 | 1.5547887  | 0.66797657 | 2.32760963 | 0.01993284 | 0.02859731 |
| GRIN2D  | ENSG00000105464 | protein_coding | 106.446859 | 1.96932482 | 0.15420542 | 12.7707888 | 2.3872E-37 | 3.3481E-36 |

|         |                 |                |            |            |            |            |            |            |
|---------|-----------------|----------------|------------|------------|------------|------------|------------|------------|
| SYNGR4  | ENSG00000105467 | protein_coding | 8.03255289 | 2.00046603 | 0.21943099 | 9.11660657 | 7.7513E-20 | 4.4887E-19 |
| LIG1    | ENSG00000105486 | protein_coding | 1542.01261 | 1.02915508 | 0.06298016 | 16.3409398 | 5.0469E-60 | 1.7112E-58 |
| SIGLEC6 | ENSG00000105492 | protein_coding | 20.5614162 | 1.06138202 | 0.17887976 | 5.93349423 | 2.9655E-09 | 8.4217E-09 |
| PLA2G4C | ENSG00000105499 | protein_coding | 1270.20386 | 1.01465334 | 0.09222173 | 11.0023238 | 3.7241E-28 | 3.3712E-27 |
| CABP5   | ENSG00000105507 | protein_coding | 1.64698509 | 2.29475391 | 0.42765027 | 5.36595925 | 8.052E-08  | 2.0308E-07 |
| HAS1    | ENSG00000105509 | protein_coding | 13.9574252 | 1.17626544 | 0.25547147 | 4.60429274 | 4.1387E-06 | 8.9437E-06 |
| THEG    | ENSG00000105549 | protein_coding | 2.48816035 | 2.98196318 | 0.41010536 | 7.27121248 | 3.5628E-13 | 1.3498E-12 |
| FGF21   | ENSG00000105550 | protein_coding | 1.48798961 | 2.85300056 | 0.4813298  | 5.92733003 | 3.079E-09  | 8.7299E-09 |
| LILRB5  | ENSG00000105609 | protein_coding | 394.951801 | 1.70657585 | 0.14897277 | 11.4556224 | 2.2037E-30 | 2.2227E-29 |
| KLF1    | ENSG00000105610 | protein_coding | 4.97245222 | 2.20319046 | 0.27035632 | 8.14921003 | 3.6631E-16 | 1.6944E-15 |
| MAST1   | ENSG00000105613 | protein_coding | 34.5353958 | 1.37291839 | 0.20838012 | 6.58852877 | 4.4421E-11 | 1.4526E-10 |
| JAK3    | ENSG00000105639 | protein_coding | 1771.53792 | 2.42729775 | 0.13004351 | 18.6652738 | 9.4888E-78 | 6.1611E-76 |
| RPL18A  | ENSG00000105640 | protein_coding | 15721.7274 | 1.12252262 | 0.09083471 | 12.3578594 | 4.4176E-35 | 5.568E-34  |
| SLC5A5  | ENSG00000105641 | protein_coding | 9.0180057  | 2.42351444 | 0.23317694 | 10.3934566 | 2.6555E-25 | 2.0699E-24 |
| KCNN1   | ENSG00000105642 | protein_coding | 194.169606 | 4.28688163 | 0.2229818  | 19.2252533 | 2.2753E-82 | 1.7211E-80 |
| ARRDC2  | ENSG00000105643 | protein_coding | 4821.58078 | 1.96056397 | 0.0994537  | 19.7133339 | 1.6568E-86 | 1.4691E-84 |
| ATP4A   | ENSG00000105675 | protein_coding | 3.39371087 | 2.67416629 | 0.39837593 | 6.71267028 | 1.9109E-11 | 6.4176E-11 |
| GAPDHS  | ENSG00000105679 | protein_coding | 1.22226712 | 2.15240837 | 0.38493435 | 5.59162463 | 2.2495E-08 | 5.9306E-08 |
| HAMP    | ENSG00000105697 | protein_coding | 90.3523433 | 3.77763812 | 0.22893321 | 16.5010491 | 3.6057E-61 | 1.2685E-59 |
| SCN1B   | ENSG00000105711 | protein_coding | 1056.26091 | 1.9890675  | 0.10231227 | 19.4411439 | 3.4636E-84 | 2.7953E-82 |
| PBX4    | ENSG00000105717 | protein_coding | 131.63391  | 1.48535987 | 0.14606021 | 10.169504  | 2.7129E-24 | 1.9962E-23 |
| PIK3CG  | ENSG00000105851 | protein_coding | 570.225718 | 1.22329989 | 0.13038318 | 9.38234433 | 6.4522E-21 | 3.9526E-20 |
| DNAH11  | ENSG00000105877 | protein_coding | 2194.50266 | 4.61392318 | 0.20891546 | 22.0851212 | 4.394E-108 | 8.681E-106 |
| DLX5    | ENSG00000105880 | protein_coding | 144.067881 | 3.41990461 | 0.15568004 | 21.967521  | 5.89E-107  | 1.134E-104 |
| STEAP1B | ENSG00000105889 | protein_coding | 28.7401751 | 1.92595984 | 0.17337346 | 11.1087353 | 1.1376E-28 | 1.0567E-27 |



|          |                 |                |            |            |            |            |            |            |
|----------|-----------------|----------------|------------|------------|------------|------------|------------|------------|
| CAV2     | ENSG00000105971 | protein_coding | 9017.14161 | 1.99417841 | 0.08903765 | 22.397025  | 4.208E-111 | 9.318E-109 |
| CAV1     | ENSG00000105974 | protein_coding | 14643.4096 | 2.22662137 | 0.10818965 | 20.5807242 | 4.0853E-94 | 4.8897E-92 |
| MET      | ENSG00000105976 | protein_coding | 17805.8509 | 1.17391307 | 0.10029744 | 11.7043171 | 1.2113E-31 | 1.301E-30  |
| HOXA13   | ENSG00000106031 | protein_coding | 98.3176558 | 2.76011902 | 0.24567287 | 11.2349361 | 2.7469E-29 | 2.6421E-28 |
| GRB10    | ENSG00000106070 | protein_coding | 9893.6113  | 1.43234543 | 0.09526527 | 15.0353374 | 4.3085E-51 | 1.0619E-49 |
| CRHR2    | ENSG00000106113 | protein_coding | 47.6257135 | 1.23574763 | 0.18977627 | 6.51160244 | 7.4353E-11 | 2.3917E-10 |
| NPTX2    | ENSG00000106236 | protein_coding | 10590.4821 | 6.97640638 | 0.25802096 | 27.0381382 | 5.266E-161 | 4.734E-158 |
| CYP3A5   | ENSG00000106258 | protein_coding | 1911.73224 | 2.0812182  | 0.17514813 | 11.8826174 | 1.4573E-32 | 1.6306E-31 |
| NUDT1    | ENSG00000106268 | protein_coding | 517.621216 | 1.2402824  | 0.08985925 | 13.8025018 | 2.4616E-43 | 4.4269E-42 |
| TFR2     | ENSG00000106327 | protein_coding | 171.905187 | 4.03826161 | 0.23744025 | 17.0074854 | 7.2274E-65 | 2.8885E-63 |
| FSCN3    | ENSG00000106328 | protein_coding | 8.15112688 | 1.63242691 | 0.17354808 | 9.40619376 | 5.1443E-21 | 3.1705E-20 |
| PAX4     | ENSG00000106331 | protein_coding | 0.44963958 | 1.47425318 | 0.53405778 | 2.76047505 | 0.00577174 | 0.0089166  |
| PPP1R17  | ENSG00000106341 | protein_coding | 4.17861622 | 1.34590721 | 0.24269693 | 5.54562937 | 2.929E-08  | 7.6471E-08 |
| SERPINE1 | ENSG00000106366 | protein_coding | 21070.4924 | 2.24354176 | 0.20940299 | 10.7139912 | 8.7506E-27 | 7.386E-26  |
| MOGAT3   | ENSG00000106384 | protein_coding | 231.508061 | 2.2341169  | 0.23861298 | 9.36293099 | 7.7555E-21 | 4.7339E-20 |
| PLOD3    | ENSG00000106397 | protein_coding | 6892.45552 | 1.37956545 | 0.07748901 | 17.8033683 | 6.6543E-71 | 3.3302E-69 |
| NOBOX    | ENSG00000106410 | protein_coding | 0.76905727 | 1.16219455 | 0.3737982  | 3.10914968 | 0.00187627 | 0.00306926 |
| MYL10    | ENSG00000106436 | protein_coding | 1.63169291 | 1.63753475 | 0.34793232 | 4.70647494 | 2.5204E-06 | 5.5514E-06 |
| EZH2     | ENSG00000106462 | protein_coding | 433.850465 | 1.8516976  | 0.09100009 | 20.3483054 | 4.806E-92  | 5.2833E-90 |
| MEOX2    | ENSG00000106511 | protein_coding | 159.719535 | 1.22853284 | 0.21321011 | 5.76207598 | 8.3086E-09 | 2.2706E-08 |
| RARRES2  | ENSG00000106538 | protein_coding | 13580.6636 | 1.63850898 | 0.14443852 | 11.343989  | 7.9439E-30 | 7.8195E-29 |
| GIMAP2   | ENSG00000106560 | protein_coding | 883.472245 | 1.26919361 | 0.09463238 | 13.4118318 | 5.155E-41  | 8.3887E-40 |
| GALNTL5  | ENSG00000106648 | protein_coding | 1.52457749 | 3.00152571 | 0.43197636 | 6.94835646 | 3.6957E-12 | 1.3053E-11 |
| LHX2     | ENSG00000106689 | protein_coding | 11.7752905 | 3.35088974 | 0.30220975 | 11.0879604 | 1.4352E-28 | 1.3249E-27 |
| PRUNE2   | ENSG00000106772 | protein_coding | 13635.809  | 1.28093742 | 0.14764659 | 8.67569917 | 4.1102E-18 | 2.1506E-17 |

|          |                 |                |            |            |            |            |            |            |
|----------|-----------------|----------------|------------|------------|------------|------------|------------|------------|
| TRIM14   | ENSG00000106785 | protein_coding | 3092.53039 | 1.09388065 | 0.10069688 | 10.8631042 | 1.7277E-27 | 1.5092E-26 |
| AKNA     | ENSG00000106948 | protein_coding | 2628.16536 | 1.45515626 | 0.09337647 | 15.5837571 | 9.3871E-55 | 2.6481E-53 |
| TNFSF8   | ENSG00000106952 | protein_coding | 262.486563 | 1.82520758 | 0.12631794 | 14.4493138 | 2.532E-47  | 5.366E-46  |
| DNM1     | ENSG00000106976 | protein_coding | 1714.06323 | 1.42402098 | 0.15876043 | 8.96962163 | 2.9753E-19 | 1.6641E-18 |
| DOCK8    | ENSG00000107099 | protein_coding | 5562.9905  | 1.17760449 | 0.08795724 | 13.388375  | 7.0711E-41 | 1.143E-39  |
| KCNT1    | ENSG00000107147 | protein_coding | 19.8328541 | 2.37179572 | 0.18823727 | 12.6000328 | 2.1106E-36 | 2.8389E-35 |
| CA9      | ENSG00000107159 | protein_coding | 11697.2025 | 6.04133579 | 0.20027662 | 30.1649583 | 6.828E-200 | 1.647E-196 |
| LHX3     | ENSG00000107187 | protein_coding | 0.73066467 | 1.81650677 | 0.53858918 | 3.37271306 | 0.00074431 | 0.00127361 |
| NPDC1    | ENSG00000107281 | protein_coding | 2899.22497 | 1.38329606 | 0.10953082 | 12.6292858 | 1.4559E-36 | 1.9723E-35 |
| PDLIM1   | ENSG00000107438 | protein_coding | 10568.7289 | 1.66222638 | 0.08423739 | 19.7326434 | 1.131E-86  | 1.0048E-84 |
| DNTT     | ENSG00000107447 | protein_coding | 6.10007171 | 2.0490471  | 0.45512665 | 4.50214699 | 6.727E-06  | 1.4235E-05 |
| RASSF4   | ENSG00000107551 | protein_coding | 10741.744  | 1.67401976 | 0.10459263 | 16.0051409 | 1.1765E-57 | 3.6813E-56 |
| PKD2L1   | ENSG00000107593 | protein_coding | 56.1684331 | 3.2185004  | 0.21758792 | 14.7917236 | 1.6566E-49 | 3.8411E-48 |
| PALD1    | ENSG00000107719 | protein_coding | 1933.67003 | 1.94915127 | 0.09068854 | 21.4928076 | 1.818E-102 | 3.041E-100 |
| UNC5B    | ENSG00000107731 | protein_coding | 6334.3209  | 1.74513389 | 0.1128522  | 15.4638889 | 6.0814E-54 | 1.6673E-52 |
| CDH23    | ENSG00000107736 | protein_coding | 523.166634 | 2.34802888 | 0.17512843 | 13.407468  | 5.4674E-41 | 8.8907E-40 |
| VSIR     | ENSG00000107738 | protein_coding | 4674.71686 | 1.18254828 | 0.07742295 | 15.273873  | 1.1419E-52 | 3.0117E-51 |
| LIPA     | ENSG00000107798 | protein_coding | 11850.0297 | 1.16845699 | 0.09822064 | 11.8962471 | 1.2379E-32 | 1.3902E-31 |
| TLX1     | ENSG00000107807 | protein_coding | 2.57443004 | 2.57014222 | 0.43298288 | 5.93589804 | 2.9224E-09 | 8.3039E-09 |
| SFXN3    | ENSG00000107819 | protein_coding | 4831.92065 | 1.21242718 | 0.06697423 | 18.1028913 | 3.0237E-73 | 1.6423E-71 |
| EBF3     | ENSG00000108001 | protein_coding | 274.456547 | 1.65780919 | 0.1557399  | 10.6447303 | 1.8452E-26 | 1.5337E-25 |
| RPL28    | ENSG00000108107 | protein_coding | 30286.8601 | 1.10610101 | 0.09660549 | 11.4496699 | 2.3604E-30 | 2.379E-29  |
| CRYBA1   | ENSG00000108255 | protein_coding | 4.03214452 | 1.69908122 | 0.23270966 | 7.3012923  | 2.8502E-13 | 1.0872E-12 |
| RAPGEFL1 | ENSG00000108352 | protein_coding | 340.735624 | 1.7716152  | 0.11848362 | 14.9524057 | 1.5022E-50 | 3.6436E-49 |
| SEPTIN4  | ENSG00000108387 | protein_coding | 2104.38962 | 1.1299436  | 0.10871897 | 10.3932511 | 2.6612E-25 | 2.074E-24  |

|         |                 |                |            |            |            |            |            |            |
|---------|-----------------|----------------|------------|------------|------------|------------|------------|------------|
| CCL1    | ENSG00000108702 | protein_coding | 0.70414779 | 1.55250268 | 0.40549896 | 3.82862313 | 0.00012886 | 0.00023975 |
| KRT32   | ENSG00000108759 | protein_coding | 7.09691867 | 3.76596158 | 0.31998038 | 11.7693514 | 5.6155E-32 | 6.1232E-31 |
| KAT2A   | ENSG00000108773 | protein_coding | 2390.18483 | 1.11924703 | 0.104723   | 10.6876902 | 1.1623E-26 | 9.7459E-26 |
| CNTNAP1 | ENSG00000108797 | protein_coding | 766.84991  | 1.62669792 | 0.11849068 | 13.728488  | 6.8549E-43 | 1.2123E-41 |
| ABI3    | ENSG00000108798 | protein_coding | 1532.52015 | 1.06186698 | 0.08074845 | 13.1503081 | 1.6948E-39 | 2.5984E-38 |
| DLX4    | ENSG00000108813 | protein_coding | 57.1891517 | 2.66749884 | 0.19287725 | 13.8300332 | 1.6794E-43 | 3.0502E-42 |
| COL1A1  | ENSG00000108821 | protein_coding | 59064.7644 | 2.79236266 | 0.20603428 | 13.5529034 | 7.6157E-42 | 1.2802E-40 |
| ALOX12  | ENSG00000108839 | protein_coding | 139.449712 | 1.20622101 | 0.09123633 | 13.2208417 | 6.6515E-40 | 1.0305E-38 |
| ABCC3   | ENSG00000108846 | protein_coding | 10323.8217 | 2.30367086 | 0.13296185 | 17.3258038 | 3.0047E-67 | 1.3056E-65 |
| CACNG1  | ENSG00000108878 | protein_coding | 1.56095697 | 1.7795774  | 0.3463066  | 5.13873372 | 2.766E-07  | 6.6615E-07 |
| SLC16A6 | ENSG00000108932 | protein_coding | 371.02157  | 1.65098041 | 0.15085719 | 10.9439952 | 7.1001E-28 | 6.342E-27  |
| WSB1    | ENSG00000109046 | protein_coding | 7760.10468 | 1.00464313 | 0.11061511 | 9.08233139 | 1.0627E-19 | 6.0965E-19 |
| RCVRN   | ENSG00000109047 | protein_coding | 2.66385028 | 1.49386109 | 0.23671179 | 6.3108858  | 2.7744E-10 | 8.5466E-10 |
| MYH1    | ENSG00000109061 | protein_coding | 10.5030321 | 1.15555329 | 0.36837631 | 3.1368827  | 0.00170754 | 0.00280769 |
| MYH3    | ENSG00000109063 | protein_coding | 162.810723 | 1.42638357 | 0.14332089 | 9.95237708 | 2.4623E-23 | 1.7165E-22 |
| ALDOC   | ENSG00000109107 | protein_coding | 5011.05027 | 2.2811126  | 0.14658319 | 15.5618976 | 1.3212E-54 | 3.7157E-53 |
| PHOX2B  | ENSG00000109132 | protein_coding | 0.93096351 | 1.8367298  | 0.517315   | 3.55050562 | 0.00038449 | 0.00067929 |
| NMU     | ENSG00000109255 | protein_coding | 49.2040369 | 2.86449338 | 0.28150983 | 10.1754649 | 2.5518E-24 | 1.8816E-23 |
| PF4V1   | ENSG00000109272 | protein_coding | 87.0574973 | 2.12137598 | 0.23309761 | 9.10080523 | 8.9665E-20 | 5.165E-19  |
| AREG    | ENSG00000109321 | protein_coding | 311.333393 | 1.09871514 | 0.18828898 | 5.83526005 | 5.3707E-09 | 1.4925E-08 |
| IL2     | ENSG00000109471 | protein_coding | 3.61641947 | 2.57219449 | 0.27344078 | 9.40676994 | 5.1162E-21 | 3.154E-20  |
| CPE     | ENSG00000109472 | protein_coding | 16471.3908 | 1.0001251  | 0.17083459 | 5.85434767 | 4.7889E-09 | 1.3366E-08 |
| ANXA10  | ENSG00000109511 | protein_coding | 5.04883218 | 1.90823121 | 0.25130259 | 7.59336084 | 3.1171E-14 | 1.2702E-13 |
| NEIL3   | ENSG00000109674 | protein_coding | 63.6647554 | 3.07236552 | 0.17260891 | 17.7995763 | 7.1206E-71 | 3.5518E-69 |
| NCAPG   | ENSG00000109805 | protein_coding | 238.640288 | 2.36517916 | 0.13674614 | 17.2961308 | 5.0306E-67 | 2.1674E-65 |

|          |                 |                |            |            |            |            |            |            |
|----------|-----------------|----------------|------------|------------|------------|------------|------------|------------|
| CRYAB    | ENSG00000109846 | protein_coding | 56295.9881 | 1.02969751 | 0.13913364 | 7.40078053 | 1.3539E-13 | 5.2923E-13 |
| DBX1     | ENSG00000109851 | protein_coding | 0.52931568 | 1.47887095 | 0.5216149  | 2.83517771 | 0.00458002 | 0.00716856 |
| HTATIP2  | ENSG00000109854 | protein_coding | 2756.59929 | 1.20319125 | 0.08711208 | 13.8119902 | 2.1579E-43 | 3.8929E-42 |
| CRTAM    | ENSG00000109943 | protein_coding | 162.308072 | 3.03213792 | 0.16910608 | 17.9303895 | 6.83E-72   | 3.5179E-70 |
| P2RX3    | ENSG00000109991 | protein_coding | 11.9962457 | 2.90180827 | 0.23093957 | 12.5652275 | 3.2793E-36 | 4.3674E-35 |
| LPXN     | ENSG00000110031 | protein_coding | 1305.34672 | 1.31164749 | 0.0810266  | 16.1878628 | 6.1425E-59 | 2.0113E-57 |
| NRXN2    | ENSG00000110076 | protein_coding | 1878.94747 | 1.49019896 | 0.16848564 | 8.84466469 | 9.1804E-19 | 4.9969E-18 |
| MS4A6A   | ENSG00000110077 | protein_coding | 4459.02145 | 2.23425574 | 0.1218125  | 18.341761  | 3.8415E-75 | 2.2376E-73 |
| MS4A4A   | ENSG00000110079 | protein_coding | 1324.83534 | 1.90825559 | 0.12993812 | 14.6858791 | 7.9398E-49 | 1.7956E-47 |
| CCND1    | ENSG00000110092 | protein_coding | 45193.3711 | 2.28721355 | 0.11097657 | 20.6098776 | 2.238E-94  | 2.6998E-92 |
| HPX      | ENSG00000110169 | protein_coding | 49.5644848 | 2.41719275 | 0.17490223 | 13.820251  | 1.924E-43  | 3.4805E-42 |
| APOA5    | ENSG00000110243 | protein_coding | 2.07908777 | 1.38964937 | 0.42947685 | 3.23567937 | 0.00121354 | 0.00202969 |
| APOA4    | ENSG00000110244 | protein_coding | 2.8762989  | 3.47034317 | 0.71372367 | 4.86230641 | 1.1603E-06 | 2.6379E-06 |
| IL10RA   | ENSG00000110324 | protein_coding | 2871.25678 | 2.2202479  | 0.12327453 | 18.0105965 | 1.6089E-72 | 8.4869E-71 |
| UPK2     | ENSG00000110375 | protein_coding | 12.8008187 | 1.06778179 | 0.16730203 | 6.38236013 | 1.7438E-10 | 5.4509E-10 |
| SLC15A3  | ENSG00000110446 | protein_coding | 2467.45402 | 1.6491702  | 0.09910179 | 16.6411747 | 3.5067E-62 | 1.2718E-60 |
| CD5      | ENSG00000110448 | protein_coding | 457.524537 | 2.09718337 | 0.14307114 | 14.658326  | 1.1917E-48 | 2.6727E-47 |
| ACCS     | ENSG00000110455 | protein_coding | 1146.93687 | 1.25744529 | 0.10675427 | 11.7788757 | 5.0158E-32 | 5.4836E-31 |
| MDK      | ENSG00000110492 | protein_coding | 2857.49158 | 1.72642316 | 0.18478571 | 9.34283916 | 9.3785E-21 | 5.7003E-20 |
| C11orf21 | ENSG00000110665 | protein_coding | 125.94407  | 2.62899253 | 0.14492431 | 18.1404522 | 1.5277E-73 | 8.4172E-72 |
| TCIRG1   | ENSG00000110719 | protein_coding | 3112.58519 | 1.48554637 | 0.09860865 | 15.0650719 | 2.7487E-51 | 6.8368E-50 |
| POU2AF1  | ENSG00000110777 | protein_coding | 281.956343 | 1.36870688 | 0.23996691 | 5.70373163 | 1.1721E-08 | 3.1655E-08 |
| VWF      | ENSG00000110799 | protein_coding | 61569.1747 | 3.00160491 | 0.14129097 | 21.2441384 | 3.735E-100 | 5.5769E-98 |
| CD69     | ENSG00000110848 | protein_coding | 495.220799 | 1.20668919 | 0.12984784 | 9.29310166 | 1.4986E-20 | 9.0282E-20 |
| CLEC2B   | ENSG00000110852 | protein_coding | 1065.61481 | 2.30073917 | 0.12487674 | 18.4240804 | 8.421E-76  | 5.0461E-74 |

|          |                 |                |            |            |            |            |            |            |
|----------|-----------------|----------------|------------|------------|------------|------------|------------|------------|
| SELPLG   | ENSG00000110876 | protein_coding | 1720.51512 | 2.04069066 | 0.10987576 | 18.5727096 | 5.3437E-77 | 3.3834E-75 |
| CORO1C   | ENSG00000110880 | protein_coding | 9543.81373 | 1.0510561  | 0.06945943 | 15.1319422 | 9.9709E-52 | 2.5267E-50 |
| BIN2     | ENSG00000110934 | protein_coding | 942.7901   | 2.00266234 | 0.10103251 | 19.8219596 | 1.9247E-87 | 1.761E-85  |
| FOXM1    | ENSG00000111206 | protein_coding | 598.797345 | 2.42292025 | 0.149656   | 16.1899301 | 5.9396E-59 | 1.9476E-57 |
| PRR4     | ENSG00000111215 | protein_coding | 66.6362065 | 1.03506099 | 0.11732941 | 8.82183784 | 1.126E-18  | 6.0917E-18 |
| MYL2     | ENSG00000111245 | protein_coding | 1.85168822 | 1.61031725 | 0.31050207 | 5.1861724  | 2.1466E-07 | 5.215E-07  |
| RAD51AP1 | ENSG00000111247 | protein_coding | 207.625042 | 1.30338375 | 0.10381522 | 12.5548421 | 3.7393E-36 | 4.9641E-35 |
| SH2B3    | ENSG00000111252 | protein_coding | 5295.10297 | 1.27995006 | 0.07901319 | 16.1991945 | 5.1092E-59 | 1.6801E-57 |
| OAS2     | ENSG00000111335 | protein_coding | 3190.72265 | 1.31361353 | 0.09989308 | 13.1501955 | 1.6974E-39 | 2.6014E-38 |
| ARHGDIB  | ENSG00000111348 | protein_coding | 14292.4248 | 1.65034506 | 0.07981065 | 20.6782573 | 5.437E-95  | 6.7544E-93 |
| IL26     | ENSG00000111536 | protein_coding | 2.45615863 | 2.6974792  | 0.29885112 | 9.02616391 | 1.778E-19  | 1.0071E-18 |
| IFNG     | ENSG00000111537 | protein_coding | 46.6580957 | 4.47676961 | 0.25678694 | 17.4337902 | 4.5713E-68 | 2.0424E-66 |
| GAPDH    | ENSG00000111640 | protein_coding | 233555.095 | 1.45971327 | 0.08508102 | 17.1567436 | 5.5965E-66 | 2.3217E-64 |
| ACRBP    | ENSG00000111644 | protein_coding | 245.785319 | 1.25129452 | 0.1027221  | 12.1813569 | 3.9073E-34 | 4.7197E-33 |
| GNB3     | ENSG00000111664 | protein_coding | 43.1783736 | 1.41984599 | 0.21361926 | 6.64661978 | 2.999E-11  | 9.9405E-11 |
| CDCA3    | ENSG00000111665 | protein_coding | 222.410614 | 1.68404424 | 0.13662053 | 12.3264365 | 6.527E-35  | 8.1727E-34 |
| ENO2     | ENSG00000111674 | protein_coding | 10587.2278 | 3.19343955 | 0.1287284  | 24.8075765 | 7.427E-136 | 3.305E-133 |
| NT5DC3   | ENSG00000111696 | protein_coding | 2437.48539 | 2.2564405  | 0.13485531 | 16.7323074 | 7.6227E-63 | 2.8203E-61 |
| SLCO1B3  | ENSG00000111700 | protein_coding | 0.78952459 | 1.46871022 | 0.57934579 | 2.5351185  | 0.01124093 | 0.0167038  |
| APOBEC1  | ENSG00000111701 | protein_coding | 0.65093611 | 1.50350559 | 0.52956039 | 2.83915793 | 0.00452328 | 0.00708458 |
| NANOG    | ENSG00000111704 | protein_coding | 3.19821165 | 1.56529236 | 0.26539749 | 5.89791697 | 3.6812E-09 | 1.0372E-08 |
| CLEC4A   | ENSG00000111729 | protein_coding | 225.308002 | 1.67968748 | 0.09931949 | 16.9119632 | 3.6727E-64 | 1.4304E-62 |
| AICDA    | ENSG00000111732 | protein_coding | 47.0597175 | 4.5177752  | 0.23965303 | 18.8513169 | 2.8662E-79 | 1.935E-77  |
| KLRB1    | ENSG00000111796 | protein_coding | 340.417928 | 1.5506035  | 0.13583287 | 11.4155251 | 3.4979E-30 | 3.4911E-29 |
| BTN3A3   | ENSG00000111801 | protein_coding | 3067.13337 | 1.44514431 | 0.08774785 | 16.4692844 | 6.0988E-61 | 2.1276E-59 |

|         |                 |                |            |            |            |            |            |            |
|---------|-----------------|----------------|------------|------------|------------|------------|------------|------------|
| GABRR2  | ENSG00000111886 | protein_coding | 42.0902608 | 1.29948618 | 0.15645007 | 8.30607599 | 9.8919E-17 | 4.7497E-16 |
| OPRM1   | ENSG00000112038 | protein_coding | 0.92380753 | 1.85018217 | 0.43556863 | 4.24773967 | 2.1594E-05 | 4.3529E-05 |
| RHAG    | ENSG00000112077 | protein_coding | 5.35405704 | 2.56753734 | 0.40531126 | 6.33472984 | 2.3776E-10 | 7.3543E-10 |
| SOD2    | ENSG00000112096 | protein_coding | 93317.3001 | 1.20448499 | 0.12327167 | 9.77097958 | 1.4999E-22 | 1.0039E-21 |
| GLP1R   | ENSG00000112164 | protein_coding | 32.4881452 | 1.25023412 | 0.24480488 | 5.10706364 | 3.272E-07  | 7.8272E-07 |
| VNN2    | ENSG00000112303 | protein_coding | 536.531179 | 1.79380074 | 0.16146866 | 11.1092811 | 1.1307E-28 | 1.0505E-27 |
| B3GAT2  | ENSG00000112309 | protein_coding | 44.94583   | 1.11413566 | 0.13012279 | 8.56218718 | 1.1075E-17 | 5.6364E-17 |
| NR2E1   | ENSG00000112333 | protein_coding | 105.255127 | 3.89625621 | 0.33173213 | 11.745188  | 7.4756E-32 | 8.0918E-31 |
| SLC17A2 | ENSG00000112337 | protein_coding | 238.730967 | 3.27489511 | 0.23015479 | 14.2290979 | 6.0457E-46 | 1.2092E-44 |
| ADGRG6  | ENSG00000112414 | protein_coding | 3825.94058 | 1.05958906 | 0.14386713 | 7.36505327 | 1.7708E-13 | 6.8692E-13 |
| CCR6    | ENSG00000112486 | protein_coding | 26.8086174 | 2.56918857 | 0.21332902 | 12.0433152 | 2.1033E-33 | 2.4527E-32 |
| GUCA1B  | ENSG00000112599 | protein_coding | 32.6198768 | 1.11699825 | 0.13661571 | 8.17620679 | 2.9292E-16 | 1.3629E-15 |
| VEGFA   | ENSG00000112715 | protein_coding | 90545.8928 | 3.45474801 | 0.12071844 | 28.6182299 | 3.986E-180 | 6.3E-177   |
| TTK     | ENSG00000112742 | protein_coding | 144.662756 | 1.83182948 | 0.1284402  | 14.2621194 | 3.7683E-46 | 7.6032E-45 |
| LAMA4   | ENSG00000112769 | protein_coding | 9781.69837 | 2.64727462 | 0.11230502 | 23.5721842 | 7.436E-123 | 2.273E-120 |
| LY86    | ENSG00000112799 | protein_coding | 702.54636  | 2.47267041 | 0.12205809 | 20.2581436 | 3.011E-91  | 3.1513E-89 |
| MEP1A   | ENSG00000112818 | protein_coding | 7.98183449 | 4.06270392 | 0.31441642 | 12.9214114 | 3.4083E-38 | 4.9381E-37 |
| PCDHB2  | ENSG00000112852 | protein_coding | 281.433375 | 1.13742363 | 0.18273312 | 6.2245072  | 4.8307E-10 | 1.4639E-09 |
| KIF20A  | ENSG00000112984 | protein_coding | 406.429962 | 2.34876296 | 0.15707143 | 14.9534703 | 1.4784E-50 | 3.5877E-49 |
| LOX     | ENSG00000113083 | protein_coding | 18587.7974 | 4.03807225 | 0.20197033 | 19.9933933 | 6.2871E-89 | 6.0676E-87 |
| GZMK    | ENSG00000113088 | protein_coding | 932.526402 | 3.32690229 | 0.20064628 | 16.5809318 | 9.5733E-62 | 3.4099E-60 |
| APBB3   | ENSG00000113108 | protein_coding | 1114.26171 | 1.46697795 | 0.11110698 | 13.2032921 | 8.3983E-40 | 1.2963E-38 |
| SPARC   | ENSG00000113140 | protein_coding | 144572.414 | 1.81111039 | 0.09947793 | 18.2061525 | 4.6124E-74 | 2.5817E-72 |
| PCDHB6  | ENSG00000113211 | protein_coding | 322.875901 | 1.80169314 | 0.18055603 | 9.97858176 | 1.8915E-23 | 1.3268E-22 |
| CLK4    | ENSG00000113240 | protein_coding | 2182.44579 | 1.4879926  | 0.09162801 | 16.2394954 | 2.651E-59  | 8.7869E-58 |



|         |                 |                |            |            |            |            |            |            |
|---------|-----------------|----------------|------------|------------|------------|------------|------------|------------|
| HAVCR1  | ENSG00000113249 | protein_coding | 3030.55415 | 2.17419503 | 0.21026133 | 10.3404418 | 4.624E-25  | 3.5458E-24 |
| ITK     | ENSG00000113263 | protein_coding | 511.994188 | 2.08953169 | 0.14425071 | 14.485417  | 1.4981E-47 | 3.1971E-46 |
| THBS4   | ENSG00000113296 | protein_coding | 428.540425 | 1.70646265 | 0.20798043 | 8.20491937 | 2.3075E-16 | 1.0809E-15 |
| IL12B   | ENSG00000113302 | protein_coding | 23.381125  | 1.82015677 | 0.24630208 | 7.38993661 | 1.469E-13  | 5.7301E-13 |
| BTNL8   | ENSG00000113303 | protein_coding | 22.5832717 | 1.0800726  | 0.15725782 | 6.86816462 | 6.5033E-12 | 2.2585E-11 |
| GABRG2  | ENSG00000113327 | protein_coding | 1.24838917 | 2.29337648 | 0.57130519 | 4.01427558 | 5.9629E-05 | 0.00011486 |
| CDH6    | ENSG00000113361 | protein_coding | 18047.6787 | 1.78438012 | 0.15298704 | 11.6636034 | 1.9559E-31 | 2.0769E-30 |
| LMNB1   | ENSG00000113368 | protein_coding | 947.275778 | 1.33908305 | 0.10222256 | 13.0996825 | 3.3064E-39 | 5.0105E-38 |
| IRX4    | ENSG00000113430 | protein_coding | 2.4789437  | 1.87650698 | 0.47866652 | 3.92028037 | 8.8446E-05 | 0.00016742 |
| IL4     | ENSG00000113520 | protein_coding | 2.80254073 | 1.52475224 | 0.238584   | 6.39084039 | 1.6498E-10 | 5.1663E-10 |
| IL5     | ENSG00000113525 | protein_coding | 4.39943982 | 1.30988775 | 0.22296224 | 5.87493089 | 4.2302E-09 | 1.1858E-08 |
| ST8SIA4 | ENSG00000113532 | protein_coding | 3294.56021 | 3.54390824 | 0.1288263  | 27.5091988 | 1.363E-166 | 1.562E-163 |
| PCDH12  | ENSG00000113555 | protein_coding | 4252.13025 | 1.15708593 | 0.11645492 | 9.93591309 | 2.905E-23  | 2.0189E-22 |
| DPYSL3  | ENSG00000113657 | protein_coding | 5183.24116 | 1.12224872 | 0.14897653 | 7.53305728 | 4.9566E-14 | 1.9952E-13 |
| STC2    | ENSG00000113739 | protein_coding | 7364.5469  | 4.24178781 | 0.14124574 | 30.0312624 | 3.836E-198 | 8.405E-195 |
| HRH2    | ENSG00000113749 | protein_coding | 904.901131 | 3.43002183 | 0.19316691 | 17.7567778 | 1.5276E-70 | 7.5054E-69 |
| UNC5A   | ENSG00000113763 | protein_coding | 136.318472 | 3.41830377 | 0.21881349 | 15.6219972 | 5.1565E-55 | 1.47E-53   |
| NPHP3   | ENSG00000113971 | protein_coding | 639.250551 | 1.14912993 | 0.09292177 | 12.3666388 | 3.9605E-35 | 5.0056E-34 |
| CD86    | ENSG00000114013 | protein_coding | 974.971074 | 2.12822927 | 0.12475543 | 17.0592121 | 2.9856E-65 | 1.2079E-63 |
| GRK7    | ENSG00000114124 | protein_coding | 5.89177879 | 1.34760098 | 0.17495701 | 7.70246914 | 1.3346E-14 | 5.572E-14  |
| LRRC31  | ENSG00000114248 | protein_coding | 57.5062583 | 1.15590439 | 0.25878947 | 4.46658209 | 7.9479E-06 | 1.6698E-05 |
| PFKFB4  | ENSG00000114268 | protein_coding | 1618.95357 | 2.41548038 | 0.11128181 | 21.7059771 | 1.802E-104 | 3.226E-102 |
| HLA2    | ENSG00000114455 | protein_coding | 3662.51206 | 3.10893655 | 0.21381894 | 14.5400426 | 6.7551E-48 | 1.4634E-46 |
| AADAC   | ENSG00000114771 | protein_coding | 4.42539558 | 2.03612422 | 0.38374701 | 5.30590257 | 1.1212E-07 | 2.7897E-07 |
| DNAH1   | ENSG00000114841 | protein_coding | 805.382679 | 1.36110021 | 0.12480831 | 10.9055254 | 1.0846E-27 | 9.595E-27  |

|         |                 |                |            |            |            |            |            |            |
|---------|-----------------|----------------|------------|------------|------------|------------|------------|------------|
| CCL20   | ENSG00000115009 | protein_coding | 1269.79282 | 3.62834657 | 0.25430788 | 14.2675349 | 3.4869E-46 | 7.0477E-45 |
| ZAP70   | ENSG00000115085 | protein_coding | 479.921649 | 2.88014804 | 0.14908361 | 19.3190117 | 3.717E-83  | 2.8541E-81 |
| STEAP3  | ENSG00000115107 | protein_coding | 2557.04877 | 1.40564586 | 0.19979816 | 7.03532943 | 1.9879E-12 | 7.1613E-12 |
| OTOF    | ENSG00000115155 | protein_coding | 20.7330735 | 2.59722948 | 0.18114197 | 14.3380881 | 1.2649E-46 | 2.6037E-45 |
| CENPA   | ENSG00000115163 | protein_coding | 73.3189761 | 2.44585171 | 0.16803642 | 14.5554859 | 5.3902E-48 | 1.1738E-46 |
| CYTIP   | ENSG00000115165 | protein_coding | 919.170864 | 1.23074857 | 0.12840538 | 9.584868   | 9.2576E-22 | 5.9545E-21 |
| SLC30A3 | ENSG00000115194 | protein_coding | 22.2837241 | 1.1794076  | 0.20814486 | 5.66628252 | 1.4593E-08 | 3.9136E-08 |
| ITGA4   | ENSG00000115232 | protein_coding | 1797.76251 | 1.7377256  | 0.11935145 | 14.5597355 | 5.0653E-48 | 1.1052E-46 |
| RPS15   | ENSG00000115268 | protein_coding | 14933.3283 | 1.00097772 | 0.0968967  | 10.3303591 | 5.1368E-25 | 3.9305E-24 |
| INO80B  | ENSG00000115274 | protein_coding | 199.027052 | 1.0816236  | 0.09880113 | 10.9474824 | 6.832E-28  | 6.1038E-27 |
| PCGF1   | ENSG00000115289 | protein_coding | 847.569985 | 1.02651018 | 0.05780691 | 17.7575699 | 1.5062E-70 | 7.4081E-69 |
| LOXL3   | ENSG00000115318 | protein_coding | 435.796775 | 1.44939896 | 0.09952601 | 14.5630173 | 4.8279E-48 | 1.0544E-46 |
| DOK1    | ENSG00000115325 | protein_coding | 814.967124 | 1.24195026 | 0.07368413 | 16.8550587 | 9.6312E-64 | 3.6792E-62 |
| REG1A   | ENSG00000115386 | protein_coding | 3132.19762 | 2.64436633 | 0.32415308 | 8.15777028 | 3.4127E-16 | 1.5808E-15 |
| FN1     | ENSG00000115414 | protein_coding | 104396.99  | 1.80172197 | 0.14894953 | 12.0961909 | 1.1063E-33 | 1.3087E-32 |
| OTX1    | ENSG00000115507 | protein_coding | 8.72781658 | 1.26681034 | 0.29265365 | 4.32870161 | 1.4999E-05 | 3.0688E-05 |
| GNLY    | ENSG00000115523 | protein_coding | 683.065932 | 3.10991135 | 0.14920255 | 20.8435539 | 1.744E-96  | 2.3308E-94 |
| PRKAG3  | ENSG00000115592 | protein_coding | 2.95390227 | 1.81813275 | 0.2816074  | 6.45626767 | 1.0732E-10 | 3.4083E-10 |
| WNT6    | ENSG00000115596 | protein_coding | 45.8396926 | 1.15407955 | 0.18691629 | 6.17431217 | 6.6452E-10 | 1.9905E-09 |
| IL18R1  | ENSG00000115604 | protein_coding | 603.23172  | 1.25667827 | 0.11663847 | 10.7741323 | 4.5606E-27 | 3.9099E-26 |
| IL18RAP | ENSG00000115607 | protein_coding | 109.129991 | 1.74824174 | 0.13577209 | 12.8762967 | 6.1203E-38 | 8.7812E-37 |
| ABCB6   | ENSG00000115657 | protein_coding | 608.475636 | 1.73998419 | 0.10458636 | 16.636817  | 3.7714E-62 | 1.3645E-60 |
| TPO     | ENSG00000115705 | protein_coding | 6.54290984 | 1.90121729 | 0.21142696 | 8.99231266 | 2.4208E-19 | 1.3611E-18 |
| HPCAL1  | ENSG00000115756 | protein_coding | 12407.328  | 1.82877626 | 0.10377446 | 17.6226041 | 1.6522E-69 | 7.8162E-68 |
| DLX2    | ENSG00000115844 | protein_coding | 12.0388163 | 3.13815719 | 0.21596477 | 14.5308754 | 7.7227E-48 | 1.666E-46  |

|         |                 |                |            |            |            |            |            |            |
|---------|-----------------|----------------|------------|------------|------------|------------|------------|------------|
| LCT     | ENSG00000115850 | protein_coding | 3.21402792 | 1.71136354 | 0.26529251 | 6.45085503 | 1.1122E-10 | 3.5281E-10 |
| DARS1   | ENSG00000115866 | protein_coding | 11045.7006 | 1.04971791 | 0.06255931 | 16.7795625 | 3.4436E-63 | 1.2918E-61 |
| SLC1A4  | ENSG00000115902 | protein_coding | 2025.79875 | 1.93056378 | 0.07507943 | 25.7136183 | 8.232E-146 | 4.965E-143 |
| WIPF1   | ENSG00000115935 | protein_coding | 5792.02343 | 1.39192014 | 0.07267355 | 19.1530508 | 9.1279E-82 | 6.7272E-80 |
| PLEK    | ENSG00000115956 | protein_coding | 2077.71744 | 2.24101629 | 0.13256349 | 16.9052304 | 4.1171E-64 | 1.5967E-62 |
| KISS1R  | ENSG00000116014 | protein_coding | 522.125176 | 6.39337237 | 0.26324965 | 24.2863468 | 2.733E-130 | 1.027E-127 |
| CD207   | ENSG00000116031 | protein_coding | 72.5632108 | 1.20336594 | 0.19368496 | 6.21300653 | 5.198E-10  | 1.5706E-09 |
| VAX2    | ENSG00000116035 | protein_coding | 20.9867259 | 1.23962145 | 0.18485622 | 6.70586822 | 2.0021E-11 | 6.7129E-11 |
| TNR     | ENSG00000116147 | protein_coding | 30.3342555 | 1.09704712 | 0.23954259 | 4.57975813 | 4.6551E-06 | 1.0011E-05 |
| TPSG1   | ENSG00000116176 | protein_coding | 198.125536 | 2.47591056 | 0.28673215 | 8.63492468 | 5.8766E-18 | 3.0453E-17 |
| ELAPOR1 | ENSG00000116299 | protein_coding | 201.279614 | 1.68729568 | 0.16872973 | 9.99999045 | 1.5241E-23 | 1.0754E-22 |
| OPRD1   | ENSG00000116329 | protein_coding | 33.6582222 | 1.78072484 | 0.14406204 | 12.360819  | 4.258E-35  | 5.3727E-34 |
| NCF2    | ENSG00000116701 | protein_coding | 1078.17505 | 1.73523467 | 0.11361562 | 15.2728528 | 1.1599E-52 | 3.0575E-51 |
| PDC     | ENSG00000116703 | protein_coding | 4.79996967 | 1.83714071 | 0.22511317 | 8.16096506 | 3.3236E-16 | 1.5407E-15 |
| RPE65   | ENSG00000116745 | protein_coding | 5.60126038 | 2.74321597 | 0.24832032 | 11.0470863 | 2.2645E-28 | 2.0695E-27 |
| CD2     | ENSG00000116824 | protein_coding | 1295.28771 | 3.0058471  | 0.16234875 | 18.5147535 | 1.5701E-76 | 9.7529E-75 |
| NR5A2   | ENSG00000116833 | protein_coding | 487.866427 | 1.27352704 | 0.11270414 | 11.2997365 | 1.3161E-29 | 1.2826E-28 |
| KIF21B  | ENSG00000116852 | protein_coding | 514.941834 | 2.11875956 | 0.1146502  | 18.4802086 | 2.9803E-76 | 1.8313E-74 |
| NID1    | ENSG00000116962 | protein_coding | 13500.3125 | 1.35439235 | 0.10705935 | 12.6508549 | 1.1066E-36 | 1.5098E-35 |
| BMP8B   | ENSG00000116985 | protein_coding | 401.445833 | 1.19504764 | 0.14880469 | 8.03098122 | 9.6696E-16 | 4.3573E-15 |
| SIPA1L2 | ENSG00000116991 | protein_coding | 2932.16191 | 1.13881075 | 0.08593235 | 13.2524095 | 4.3695E-40 | 6.8245E-39 |
| SLAMF1  | ENSG00000117090 | protein_coding | 163.13718  | 1.49045007 | 0.14716137 | 10.1279979 | 4.1506E-24 | 3.0192E-23 |
| CD48    | ENSG00000117091 | protein_coding | 1300.83634 | 1.93546225 | 0.13447602 | 14.3926199 | 5.7573E-47 | 1.2013E-45 |
| ACTL8   | ENSG00000117148 | protein_coding | 4.57411478 | 4.28637769 | 0.58446083 | 7.33390066 | 2.2355E-13 | 8.5971E-13 |
| IGSF21  | ENSG00000117154 | protein_coding | 169.295628 | 1.54038748 | 0.13651729 | 11.2834607 | 1.5839E-29 | 1.5393E-28 |

|         |                 |                |            |            |            |            |            |            |
|---------|-----------------|----------------|------------|------------|------------|------------|------------|------------|
| PLA2G2D | ENSG00000117215 | protein_coding | 148.136753 | 3.28288946 | 0.26763511 | 12.2662884 | 1.3741E-34 | 1.6965E-33 |
| GBP1    | ENSG00000117228 | protein_coding | 5624.30812 | 1.8149794  | 0.13050094 | 13.9077881 | 5.6809E-44 | 1.0518E-42 |
| CDK18   | ENSG00000117266 | protein_coding | 17148.0801 | 2.35194125 | 0.11386574 | 20.6553905 | 8.7312E-95 | 1.0702E-92 |
| CD160   | ENSG00000117281 | protein_coding | 75.2030904 | 1.85376566 | 0.1157146  | 16.0201529 | 9.2423E-58 | 2.9099E-56 |
| P3H1    | ENSG00000117385 | protein_coding | 2355.38404 | 1.31908114 | 0.08707509 | 15.1487766 | 7.719E-52  | 1.9713E-50 |
| SLC2A1  | ENSG00000117394 | protein_coding | 16502.9858 | 1.99380523 | 0.12246682 | 16.2803707 | 1.3604E-59 | 4.5521E-58 |
| CDC20   | ENSG00000117399 | protein_coding | 341.698719 | 1.69345597 | 0.15229866 | 11.11931   | 1.0105E-28 | 9.4247E-28 |
| PTCH2   | ENSG00000117425 | protein_coding | 137.551414 | 1.46120906 | 0.12877533 | 11.3469644 | 7.6782E-30 | 7.5613E-29 |
| MROH9   | ENSG00000117501 | protein_coding | 2.74404975 | 2.87466316 | 0.33889075 | 8.48256606 | 2.2028E-17 | 1.1025E-16 |
| FASLG   | ENSG00000117560 | protein_coding | 155.000431 | 3.48046509 | 0.17513595 | 19.8729336 | 6.9802E-88 | 6.4905E-86 |
| PLPPR5  | ENSG00000117598 | protein_coding | 386.879562 | 6.37725596 | 0.2960849  | 21.538606  | 6.771E-103 | 1.145E-100 |
| RSRP1   | ENSG00000117616 | protein_coding | 2417.99358 | 1.03097947 | 0.12808143 | 8.04940653 | 8.3196E-16 | 3.7623E-15 |
| NEK2    | ENSG00000117650 | protein_coding | 137.87928  | 2.0523158  | 0.15408546 | 13.3193351 | 1.7869E-40 | 2.8482E-39 |
| CENPF   | ENSG00000117724 | protein_coding | 764.629942 | 1.80501055 | 0.14184047 | 12.7256387 | 4.2598E-37 | 5.9155E-36 |
| MUC5B   | ENSG00000117983 | protein_coding | 27.6149635 | 2.88531592 | 0.24645444 | 11.7072995 | 1.1695E-31 | 1.2569E-30 |
| A4GNT   | ENSG00000118017 | protein_coding | 52.1841005 | 1.38553432 | 0.18851443 | 7.34975197 | 1.9857E-13 | 7.6695E-13 |
| KIF14   | ENSG00000118193 | protein_coding | 116.5783   | 2.71942633 | 0.14903399 | 18.2470215 | 2.185E-74  | 1.2412E-72 |
| NRP2    | ENSG00000118257 | protein_coding | 4526.80032 | 1.69097443 | 0.11154625 | 15.1594019 | 6.5665E-52 | 1.6845E-50 |
| C1orf54 | ENSG00000118292 | protein_coding | 775.447164 | 1.06536428 | 0.09247137 | 11.5210175 | 1.0338E-30 | 1.0567E-29 |
| IRAG2   | ENSG00000118308 | protein_coding | 1340.81498 | 1.21398943 | 0.11858002 | 10.2377233 | 1.3436E-24 | 1.0062E-23 |
| FILIP1  | ENSG00000118407 | protein_coding | 1225.31181 | 1.38967151 | 0.11950731 | 11.6283394 | 2.958E-31  | 3.115E-30  |
| CNR1    | ENSG00000118432 | protein_coding | 131.93988  | 1.67940767 | 0.19441866 | 8.63809941 | 5.7156E-18 | 2.9646E-17 |
| PLAGL1  | ENSG00000118495 | protein_coding | 2029.63623 | 1.2230301  | 0.1118971  | 10.9299539 | 8.2891E-28 | 7.3739E-27 |
| TNFAIP3 | ENSG00000118503 | protein_coding | 4094.98146 | 1.27319611 | 0.09285414 | 13.7117866 | 8.6306E-43 | 1.5193E-41 |
| MYB     | ENSG00000118513 | protein_coding | 53.3565847 | 2.51176288 | 0.19246278 | 13.0506419 | 6.3014E-39 | 9.4E-38    |

|         |                 |                |            |            |            |            |            |            |
|---------|-----------------|----------------|------------|------------|------------|------------|------------|------------|
| ARG1    | ENSG00000118520 | protein_coding | 13.5697154 | 1.13858997 | 0.15260836 | 7.46086258 | 8.5958E-14 | 3.4042E-13 |
| PMFBP1  | ENSG00000118557 | protein_coding | 55.8424452 | 2.08956479 | 0.15214196 | 13.7343096 | 6.3256E-43 | 1.1209E-41 |
| GHRH    | ENSG00000118702 | protein_coding | 0.46195062 | 1.11737742 | 0.4907533  | 2.27686175 | 0.02279448 | 0.03243537 |
| PCDH17  | ENSG00000118946 | protein_coding | 2774.39694 | 1.98551209 | 0.13016918 | 15.2533194 | 1.5647E-52 | 4.1035E-51 |
| CCND2   | ENSG00000118971 | protein_coding | 4173.24473 | 1.18947918 | 0.10555581 | 11.2687228 | 1.8727E-29 | 1.813E-28  |
| FGF23   | ENSG00000118972 | protein_coding | 2.28702006 | 1.21730375 | 0.40300917 | 3.02053614 | 0.00252328 | 0.00406943 |
| NEK6    | ENSG00000119408 | protein_coding | 7048.60552 | 1.96280741 | 0.10862572 | 18.0694535 | 5.546E-73  | 2.984E-71  |
| SLC46A2 | ENSG00000119457 | protein_coding | 14.4283593 | 1.20734908 | 0.1484037  | 8.13557277 | 4.1E-16    | 1.8906E-15 |
| CSF3R   | ENSG00000119535 | protein_coding | 1079.61384 | 2.7352057  | 0.13291374 | 20.5788026 | 4.2505E-94 | 5.0742E-92 |
| PROX2   | ENSG00000119608 | protein_coding | 22.8054271 | 1.2815288  | 0.15236296 | 8.4110256  | 4.0644E-17 | 1.9993E-16 |
| PGF     | ENSG00000119630 | protein_coding | 9161.45201 | 4.66716876 | 0.20531252 | 22.7320223 | 2.161E-114 | 5.134E-112 |
| BCL11A  | ENSG00000119866 | protein_coding | 198.563072 | 1.53236037 | 0.14188668 | 10.799889  | 3.4462E-27 | 2.9701E-26 |
| NKX2-3  | ENSG00000119919 | protein_coding | 13.4034631 | 3.13231886 | 0.42517843 | 7.36706914 | 1.7442E-13 | 6.7696E-13 |
| PPP1R3C | ENSG00000119938 | protein_coding | 4006.19145 | 1.95662075 | 0.11480727 | 17.0426559 | 3.9632E-65 | 1.6008E-63 |
| PRLHR   | ENSG00000119973 | protein_coding | 1.67986959 | 2.76175049 | 0.37933622 | 7.28048191 | 3.3263E-13 | 1.2638E-12 |
| KCNIP2  | ENSG00000120049 | protein_coding | 104.317156 | 1.70647451 | 0.15334638 | 11.1282351 | 9.1428E-29 | 8.5472E-28 |
| CXorf21 | ENSG00000120280 | protein_coding | 207.532616 | 1.62708848 | 0.12690615 | 12.8211944 | 1.2476E-37 | 1.7707E-36 |
| PCDHB8  | ENSG00000120322 | protein_coding | 103.500638 | 1.06959261 | 0.17569157 | 6.08789938 | 1.144E-09  | 3.3617E-09 |
| PCDHB10 | ENSG00000120324 | protein_coding | 358.455019 | 1.7026157  | 0.10947043 | 15.5532023 | 1.5135E-54 | 4.233E-53  |
| PCDHB14 | ENSG00000120327 | protein_coding | 791.765839 | 1.38076304 | 0.1124514  | 12.2787537 | 1.178E-34  | 1.4591E-33 |
| SLC25A2 | ENSG00000120329 | protein_coding | 3.88327466 | 1.69302017 | 0.25071719 | 6.75270877 | 1.4511E-11 | 4.9154E-11 |
| SEC16B  | ENSG00000120341 | protein_coding | 43.745845  | 1.71260276 | 0.1283291  | 13.3453965 | 1.26E-40   | 2.0174E-39 |
| GPR31   | ENSG00000120436 | protein_coding | 7.33270171 | 2.26394602 | 0.24441985 | 9.26252925 | 1.9965E-20 | 1.1918E-19 |
| TEX11   | ENSG00000120498 | protein_coding | 332.920859 | 4.22072864 | 0.24534794 | 17.2030329 | 2.5199E-66 | 1.0569E-64 |
| LYZL1   | ENSG00000120563 | protein_coding | 7.11431441 | 4.27308952 | 0.36501173 | 11.7067184 | 1.1775E-31 | 1.2653E-30 |

|           |                 |                |            |            |            |            |            |            |
|-----------|-----------------|----------------|------------|------------|------------|------------|------------|------------|
| IQSEC3    | ENSG00000120645 | protein_coding | 900.400344 | 1.19994675 | 0.23739295 | 5.05468577 | 4.311E-07  | 1.0204E-06 |
| TNFSF11   | ENSG00000120659 | protein_coding | 34.9876931 | 2.1255455  | 0.24754792 | 8.58640033 | 8.9737E-18 | 4.5906E-17 |
| TGFBI     | ENSG00000120708 | protein_coding | 91296.36   | 4.12603907 | 0.24295989 | 16.9823879 | 1.1088E-64 | 4.4008E-63 |
| MYOT      | ENSG00000120729 | protein_coding | 99.7594977 | 1.41555827 | 0.18024835 | 7.85337733 | 4.0498E-15 | 1.7522E-14 |
| DUSP4     | ENSG00000120875 | protein_coding | 1012.63112 | 1.91178826 | 0.12660219 | 15.1007523 | 1.601E-51  | 4.017E-50  |
| TNFRSF10B | ENSG00000120889 | protein_coding | 5715.72009 | 1.49752639 | 0.07025312 | 21.3161555 | 8.04E-101  | 1.2409E-98 |
| TBX4      | ENSG00000121075 | protein_coding | 9.19198498 | 1.807237   | 0.21039626 | 8.58968214 | 8.721E-18  | 4.4673E-17 |
| NCAPH     | ENSG00000121152 | protein_coding | 170.447528 | 1.92568112 | 0.12675996 | 15.1915567 | 4.0225E-52 | 1.0418E-50 |
| LRAT      | ENSG00000121207 | protein_coding | 263.134056 | 2.27928098 | 0.17792942 | 12.8100284 | 1.4408E-37 | 2.0411E-36 |
| TMEM131L  | ENSG00000121210 | protein_coding | 1243.10207 | 1.10198664 | 0.06369014 | 17.3023126 | 4.5188E-67 | 1.9524E-65 |
| MND1      | ENSG00000121211 | protein_coding | 58.897833  | 1.53935808 | 0.11657621 | 13.2047366 | 8.2387E-40 | 1.2729E-38 |
| ADCY7     | ENSG00000121281 | protein_coding | 545.522761 | 1.9087064  | 0.13624317 | 14.0095562 | 1.3625E-44 | 2.5767E-43 |
| TAS2R10   | ENSG00000121318 | protein_coding | 7.3802303  | 1.44363384 | 0.17250902 | 8.36845409 | 5.8379E-17 | 2.8421E-16 |
| A1BG      | ENSG00000121410 | protein_coding | 15.5482231 | 1.04280865 | 0.1433777  | 7.27315781 | 3.5118E-13 | 1.3315E-12 |
| RGSL1     | ENSG00000121446 | protein_coding | 3.6911368  | 3.24363786 | 0.31736455 | 10.2205424 | 1.6044E-24 | 1.1955E-23 |
| CSTA      | ENSG00000121552 | protein_coding | 207.621215 | 2.32670802 | 0.13595017 | 17.1144174 | 1.1587E-65 | 4.7425E-64 |
| DPPA4     | ENSG00000121570 | protein_coding | 5.63955633 | 1.21529003 | 0.22562274 | 5.38638105 | 7.189E-08  | 1.8213E-07 |
| POPDC2    | ENSG00000121577 | protein_coding | 538.943018 | 1.57011968 | 0.10545028 | 14.8896684 | 3.8467E-50 | 9.1604E-49 |
| CD80      | ENSG00000121594 | protein_coding | 55.154158  | 2.46230727 | 0.15641451 | 15.7421918 | 7.7705E-56 | 2.2717E-54 |
| KIF18A    | ENSG00000121621 | protein_coding | 148.438516 | 1.54123631 | 0.11945972 | 12.9017237 | 4.4014E-38 | 6.3588E-37 |
| PILRB     | ENSG00000121716 | protein_coding | 526.492002 | 2.41598769 | 0.19452219 | 12.4201138 | 2.0327E-35 | 2.6131E-34 |
| GJB6      | ENSG00000121742 | protein_coding | 15.1103804 | 1.0470379  | 0.34338178 | 3.04919467 | 0.00229456 | 0.00371665 |
| CCRL2     | ENSG00000121797 | protein_coding | 388.34223  | 1.43122597 | 0.11607474 | 12.3302104 | 6.2284E-35 | 7.8095E-34 |
| CCR2      | ENSG00000121807 | protein_coding | 529.129149 | 1.324722   | 0.15021352 | 8.8189266  | 1.1556E-18 | 6.2478E-18 |
| TMEM156   | ENSG00000121895 | protein_coding | 115.952511 | 1.42334884 | 0.13101128 | 10.8643224 | 1.7048E-27 | 1.4897E-26 |



|         |                 |                |            |            |            |            |            |            |
|---------|-----------------|----------------|------------|------------|------------|------------|------------|------------|
| CSMD2   | ENSG00000121904 | protein_coding | 152.954511 | 1.00396443 | 0.14331201 | 7.00544531 | 2.462E-12  | 8.8097E-12 |
| HPCA    | ENSG00000121905 | protein_coding | 88.5476707 | 2.78786347 | 0.16075842 | 17.341944  | 2.2693E-67 | 9.9074E-66 |
| TMIGD3  | ENSG00000121933 | protein_coding | 895.931034 | 2.90972008 | 0.12913536 | 22.532326  | 2.002E-112 | 4.52E-110  |
| CXCR4   | ENSG00000121966 | protein_coding | 10970.205  | 2.76691091 | 0.10747453 | 25.744807  | 3.685E-146 | 2.314E-143 |
| SV2C    | ENSG00000122012 | protein_coding | 30.0564388 | 1.0563712  | 0.18554907 | 5.6932174  | 1.2467E-08 | 3.3591E-08 |
| SASH3   | ENSG00000122122 | protein_coding | 1404.81712 | 2.4667579  | 0.11975453 | 20.598452  | 2.8336E-94 | 3.4004E-92 |
| PAEP    | ENSG00000122133 | protein_coding | 128.850742 | 7.35970145 | 0.50521373 | 14.5675008 | 4.5213E-48 | 9.9026E-47 |
| OBP2A   | ENSG00000122136 | protein_coding | 4.13383074 | 3.79516711 | 0.34722297 | 10.9300577 | 8.2796E-28 | 7.3669E-27 |
| LAX1    | ENSG00000122188 | protein_coding | 153.551111 | 2.02155914 | 0.16683978 | 12.1167694 | 8.6086E-34 | 1.0239E-32 |
| CD244   | ENSG00000122223 | protein_coding | 158.685974 | 2.29959791 | 0.12752911 | 18.0319449 | 1.0938E-72 | 5.7964E-71 |
| LY9     | ENSG00000122224 | protein_coding | 180.830106 | 2.08852843 | 0.148612   | 14.0535648 | 7.3252E-45 | 1.398E-43  |
| HS3ST2  | ENSG00000122254 | protein_coding | 351.265691 | 4.89217506 | 0.22913906 | 21.3502447 | 3.879E-101 | 6.111E-99  |
| OPN4    | ENSG00000122375 | protein_coding | 18.8162953 | 5.43369728 | 0.33603128 | 16.1702128 | 8.1815E-59 | 2.6618E-57 |
| ZNF205  | ENSG00000122386 | protein_coding | 973.920009 | 1.03722107 | 0.07648911 | 13.5603752 | 6.8783E-42 | 1.1579E-40 |
| LRRC39  | ENSG00000122477 | protein_coding | 67.8710906 | 1.65413549 | 0.13873605 | 11.9228958 | 8.9928E-33 | 1.0161E-31 |
| CCDC18  | ENSG00000122483 | protein_coding | 187.009017 | 1.25422615 | 0.10752643 | 11.6643524 | 1.9387E-31 | 2.0592E-30 |
| OCM     | ENSG00000122543 | protein_coding | 5.28661625 | 1.48807326 | 0.19401681 | 7.66981625 | 1.7224E-14 | 7.1397E-14 |
| ARL4A   | ENSG00000122644 | protein_coding | 1037.32818 | 1.11871276 | 0.08469896 | 13.2081056 | 7.8782E-40 | 1.218E-38  |
| TWIST1  | ENSG00000122691 | protein_coding | 65.5908198 | 1.06222991 | 0.15761445 | 6.73941955 | 1.5902E-11 | 5.3687E-11 |
| GLIPR2  | ENSG00000122694 | protein_coding | 1253.24296 | 1.03256533 | 0.09156435 | 11.2769361 | 1.7058E-29 | 1.6553E-28 |
| AKR1D1  | ENSG00000122787 | protein_coding | 8.45746606 | 2.38098175 | 0.3215485  | 7.40473609 | 1.3141E-13 | 5.1413E-13 |
| SFTPA1  | ENSG00000122852 | protein_coding | 2.14121988 | 1.1065947  | 0.40352877 | 2.74229442 | 0.00610116 | 0.00940207 |
| NEUROG3 | ENSG00000122859 | protein_coding | 2.45268214 | 1.81272497 | 0.31828912 | 5.69521501 | 1.2322E-08 | 3.3212E-08 |
| P4HA1   | ENSG00000122884 | protein_coding | 8762.6426  | 1.68994956 | 0.08474007 | 19.9427449 | 1.7329E-88 | 1.6379E-86 |
| HVCN1   | ENSG00000122986 | protein_coding | 600.012806 | 1.38756283 | 0.07771891 | 17.8536063 | 2.7096E-71 | 1.371E-69  |

|         |                 |                |            |            |            |            |            |            |
|---------|-----------------|----------------|------------|------------|------------|------------|------------|------------|
| CDKN2C  | ENSG00000123080 | protein_coding | 1379.02412 | 1.53522533 | 0.09140725 | 16.7954441 | 2.6352E-63 | 9.9426E-62 |
| BHLHE41 | ENSG00000123095 | protein_coding | 7752.45951 | 2.74347267 | 0.11635957 | 23.5775428 | 6.552E-123 | 2.016E-120 |
| SSPN    | ENSG00000123096 | protein_coding | 2704.97615 | 1.17062171 | 0.10309468 | 11.3548218 | 7.0183E-30 | 6.9173E-29 |
| PRDX4   | ENSG00000123131 | protein_coding | 5434.74222 | 1.4183511  | 0.08133429 | 17.4385376 | 4.207E-68  | 1.8852E-66 |
| DDX39A  | ENSG00000123136 | protein_coding | 2497.18534 | 1.01095361 | 0.0757681  | 13.3427337 | 1.3058E-40 | 2.0886E-39 |
| ADGRE5  | ENSG00000123146 | protein_coding | 5306.55438 | 1.10749236 | 0.08612765 | 12.858732  | 7.6827E-38 | 1.0978E-36 |
| CCDC70  | ENSG00000123171 | protein_coding | 0.64937411 | 1.03820991 | 0.343924   | 3.01871898 | 0.00253846 | 0.00409262 |
| CENPK   | ENSG00000123219 | protein_coding | 157.069052 | 1.92948255 | 0.11343963 | 17.0088926 | 7.0559E-65 | 2.8224E-63 |
| NEUROD4 | ENSG00000123307 | protein_coding | 3.46452038 | 2.58587064 | 0.6164506  | 4.19477351 | 2.7314E-05 | 5.453E-05  |
| ARHGAP9 | ENSG00000123329 | protein_coding | 786.842912 | 2.54480536 | 0.12685671 | 20.060471  | 1.6353E-89 | 1.6156E-87 |
| NCKAP1L | ENSG00000123338 | protein_coding | 2909.50561 | 2.30023615 | 0.12670301 | 18.1545499 | 1.1819E-73 | 6.5357E-72 |
| PDE1B   | ENSG00000123360 | protein_coding | 980.616388 | 1.64609244 | 0.10627243 | 15.4893642 | 4.0932E-54 | 1.129E-52  |
| HOXC13  | ENSG00000123364 | protein_coding | 16.8386636 | 1.90462482 | 0.21175544 | 8.99445528 | 2.3741E-19 | 1.335E-18  |
| HOXC12  | ENSG00000123407 | protein_coding | 10.3304665 | 2.25866868 | 0.23701841 | 9.52950734 | 1.5803E-21 | 1.0028E-20 |
| TUBA1B  | ENSG00000123416 | protein_coding | 11469.9828 | 1.07663879 | 0.0839673  | 12.8221194 | 1.2328E-37 | 1.7508E-36 |
| HJURP   | ENSG00000123485 | protein_coding | 206.375842 | 2.88255862 | 0.16100273 | 17.9037874 | 1.1017E-71 | 5.6239E-70 |
| H2BW1   | ENSG00000123569 | protein_coding | 0.52844939 | 1.3405807  | 0.46362452 | 2.89152247 | 0.0038338  | 0.00605789 |
| NMI     | ENSG00000123609 | protein_coding | 1430.48486 | 1.01434441 | 0.07000657 | 14.4892742 | 1.4163E-47 | 3.0268E-46 |
| TNFAIP6 | ENSG00000123610 | protein_coding | 2797.51529 | 5.65781903 | 0.20413433 | 27.7161564 | 4.46E-169  | 5.242E-166 |
| BATF3   | ENSG00000123685 | protein_coding | 214.208184 | 2.12111115 | 0.12704419 | 16.6958526 | 1.405E-62  | 5.1524E-61 |
| KCNJ2   | ENSG00000123700 | protein_coding | 1154.90061 | 1.8568814  | 0.1326101  | 14.0025639 | 1.5035E-44 | 2.8362E-43 |
| C4BPA   | ENSG00000123838 | protein_coding | 40.6056113 | 1.36033155 | 0.3233921  | 4.20644644 | 2.5942E-05 | 5.1903E-05 |
| INHA    | ENSG00000123999 | protein_coding | 89.805753  | 1.08994238 | 0.24527304 | 4.44379209 | 8.8387E-06 | 1.8486E-05 |
| GCNT7   | ENSG00000124091 | protein_coding | 15.0521452 | 1.70535521 | 0.18422857 | 9.25673586 | 2.1078E-20 | 1.2563E-19 |
| PI3     | ENSG00000124102 | protein_coding | 77.0201307 | 2.69097819 | 0.32338431 | 8.32130102 | 8.7003E-17 | 4.1929E-16 |

|         |                 |                |            |            |            |            |            |            |
|---------|-----------------|----------------|------------|------------|------------|------------|------------|------------|
| FAM209A | ENSG00000124103 | protein_coding | 5.67586338 | 1.99086474 | 0.20123507 | 9.89322966 | 4.4542E-23 | 3.0663E-22 |
| WFDC3   | ENSG00000124116 | protein_coding | 54.4208633 | 1.05869055 | 0.18889221 | 5.60473377 | 2.0858E-08 | 5.5172E-08 |
| PREX1   | ENSG00000124126 | protein_coding | 5446.28269 | 1.34368081 | 0.0803299  | 16.7270312 | 8.3288E-63 | 3.079E-61  |
| SLC12A5 | ENSG00000124140 | protein_coding | 71.3579695 | 2.41628491 | 0.14767873 | 16.3617663 | 3.5857E-60 | 1.223E-58  |
| TOX2    | ENSG00000124191 | protein_coding | 529.630228 | 1.70296945 | 0.11984129 | 14.2102057 | 7.9193E-46 | 1.5763E-44 |
| GDAP1L1 | ENSG00000124194 | protein_coding | 12.1439904 | 1.67846493 | 0.23610085 | 7.10910168 | 1.168E-12  | 4.28E-12   |
| GTSF1L  | ENSG00000124196 | protein_coding | 5.22874396 | 3.77232778 | 0.36121581 | 10.4434183 | 1.5705E-25 | 1.2394E-24 |
| ZNF831  | ENSG00000124203 | protein_coding | 172.368016 | 2.24216869 | 0.15626337 | 14.3486522 | 1.0863E-46 | 2.241E-45  |
| CDH26   | ENSG00000124215 | protein_coding | 55.0476603 | 1.62227978 | 0.10878171 | 14.9131671 | 2.7061E-50 | 6.4947E-49 |
| PMEPA1  | ENSG00000124225 | protein_coding | 7714.88086 | 1.59127453 | 0.12176857 | 13.0680233 | 5.0152E-39 | 7.5279E-38 |
| ANKRD60 | ENSG00000124227 | protein_coding | 0.62728267 | 1.94284084 | 0.72253674 | 2.68891633 | 0.00716844 | 0.01094632 |
| RBPJL   | ENSG00000124232 | protein_coding | 3.67014008 | 1.83367408 | 0.30636928 | 5.98517612 | 2.1616E-09 | 6.212E-09  |
| ZBP1    | ENSG00000124256 | protein_coding | 144.812392 | 2.85624177 | 0.17043513 | 16.7585271 | 4.9063E-63 | 1.827E-61  |
| MAGEA10 | ENSG00000124260 | protein_coding | 2.75208598 | 3.64431884 | 0.41015556 | 8.88521138 | 6.3799E-19 | 3.5051E-18 |
| IL9R    | ENSG00000124334 | protein_coding | 19.8398255 | 2.11794484 | 0.17236938 | 12.2872453 | 1.0606E-34 | 1.3165E-33 |
| IRGC    | ENSG00000124449 | protein_coding | 1.00125564 | 2.17892253 | 0.41273562 | 5.27922091 | 1.2973E-07 | 3.2105E-07 |
| PSG8    | ENSG00000124467 | protein_coding | 1.69601015 | 2.5183723  | 0.57291382 | 4.39572623 | 1.104E-05  | 2.2887E-05 |
| CEACAM8 | ENSG00000124469 | protein_coding | 2.59297483 | 1.20570788 | 0.30828226 | 3.9110517  | 9.1895E-05 | 0.00017366 |
| GRM4    | ENSG00000124493 | protein_coding | 12.7133415 | 1.99878158 | 0.24214233 | 8.25457306 | 1.5245E-16 | 7.2343E-16 |
| BTN2A2  | ENSG00000124508 | protein_coding | 1560.40781 | 1.17229518 | 0.07273047 | 16.1183505 | 1.896E-58  | 6.0994E-57 |
| BTN1A1  | ENSG00000124557 | protein_coding | 7.13303182 | 1.11267941 | 0.16079405 | 6.91990423 | 4.5195E-12 | 1.5858E-11 |
| SLC17A3 | ENSG00000124564 | protein_coding | 12486.1476 | 1.60646386 | 0.24426765 | 6.57665415 | 4.8115E-11 | 1.5697E-10 |
| H2BC11  | ENSG00000124635 | protein_coding | 38.390984  | 1.16232066 | 0.17588986 | 6.60822989 | 3.8894E-11 | 1.2772E-10 |
| OR2B6   | ENSG00000124657 | protein_coding | 3.09424833 | 2.08978144 | 0.27968954 | 7.47178968 | 7.9111E-14 | 3.1431E-13 |
| SPDEF   | ENSG00000124664 | protein_coding | 27.7343208 | 2.97084257 | 0.27271099 | 10.8937398 | 1.2346E-27 | 1.0886E-26 |

|          |                 |                |            |            |            |            |            |            |
|----------|-----------------|----------------|------------|------------|------------|------------|------------|------------|
| TREM1    | ENSG00000124731 | protein_coding | 228.777894 | 2.10980503 | 0.20541763 | 10.2708078 | 9.5402E-25 | 7.1989E-24 |
| KLHL31   | ENSG00000124743 | protein_coding | 97.7567188 | 1.66484179 | 0.13089811 | 12.7186086 | 4.6609E-37 | 6.453E-36  |
| COL21A1  | ENSG00000124749 | protein_coding | 744.542293 | 2.20753475 | 0.1710988  | 12.9021056 | 4.3796E-38 | 6.3294E-37 |
| CPNE5    | ENSG00000124772 | protein_coding | 545.500143 | 1.75326698 | 0.13526988 | 12.9612518 | 2.0291E-38 | 2.9604E-37 |
| KCNK17   | ENSG00000124780 | protein_coding | 40.4217701 | 3.50715808 | 0.27628874 | 12.6938149 | 6.3991E-37 | 8.8064E-36 |
| NRN1     | ENSG00000124785 | protein_coding | 1259.24591 | 1.12271937 | 0.18032966 | 6.22592731 | 4.7872E-10 | 1.4512E-09 |
| RUNX2    | ENSG00000124813 | protein_coding | 599.624548 | 1.45095103 | 0.12034045 | 12.0570515 | 1.7804E-33 | 2.0821E-32 |
| OPN5     | ENSG00000124818 | protein_coding | 2.3497122  | 1.10634521 | 0.2740198  | 4.03746452 | 5.4032E-05 | 0.00010463 |
| GCM2     | ENSG00000124827 | protein_coding | 1.66401277 | 1.24116624 | 0.3213682  | 3.86213143 | 0.0001124  | 0.00021053 |
| WNT1     | ENSG00000125084 | protein_coding | 4.24685385 | 2.5241345  | 0.24853819 | 10.1559222 | 3.1185E-24 | 2.284E-23  |
| GPR18    | ENSG00000125245 | protein_coding | 66.7996273 | 2.17032381 | 0.16368368 | 13.2592564 | 3.9883E-40 | 6.2484E-39 |
| SOX21    | ENSG00000125285 | protein_coding | 4.2399285  | 2.35738738 | 0.31384588 | 7.51128982 | 5.8548E-14 | 2.346E-13  |
| HROB     | ENSG00000125319 | protein_coding | 120.776153 | 1.53766635 | 0.09716589 | 15.8251654 | 2.0865E-56 | 6.2068E-55 |
| KIF25    | ENSG00000125337 | protein_coding | 22.9123187 | 1.14752614 | 0.16364672 | 7.01221608 | 2.3457E-12 | 8.4061E-12 |
| IRF1     | ENSG00000125347 | protein_coding | 4972.03979 | 1.10611818 | 0.10560945 | 10.4736668 | 1.1413E-25 | 9.0834E-25 |
| TMEM255A | ENSG00000125355 | protein_coding | 570.360633 | 1.258907   | 0.24052745 | 5.23394325 | 1.6593E-07 | 4.0715E-07 |
| AMELX    | ENSG00000125363 | protein_coding | 1.52108438 | 2.26722187 | 0.44407406 | 5.10550394 | 3.2991E-07 | 7.8888E-07 |
| MYH2     | ENSG00000125414 | protein_coding | 4.70430157 | 1.22274135 | 0.38782486 | 3.15281835 | 0.00161702 | 0.00266592 |
| C1orf61  | ENSG00000125462 | protein_coding | 10.4396448 | 2.68398067 | 0.22359252 | 12.0038929 | 3.3897E-33 | 3.92E-32   |
| KIR2DL1  | ENSG00000125498 | protein_coding | 11.2525019 | 2.44309755 | 0.18405229 | 13.2739316 | 3.2791E-40 | 5.1603E-39 |
| BHLHE23  | ENSG00000125533 | protein_coding | 0.56670526 | 1.50997339 | 0.40632837 | 3.71614066 | 0.00020229 | 0.00036862 |
| PLGLB2   | ENSG00000125551 | protein_coding | 3.74175556 | 1.75456005 | 0.2205124  | 7.95674109 | 1.7663E-15 | 7.8359E-15 |
| IL37     | ENSG00000125571 | protein_coding | 1.31179064 | 2.57580591 | 0.33928432 | 7.59188017 | 3.153E-14  | 1.2842E-13 |
| TNFSF9   | ENSG00000125657 | protein_coding | 527.941279 | 3.45990391 | 0.16332285 | 21.184445  | 1.329E-99  | 1.9462E-97 |
| CD70     | ENSG00000125726 | protein_coding | 2928.12793 | 6.09412712 | 0.23412911 | 26.0289164 | 2.331E-149 | 1.696E-146 |

|           |                 |                |            |            |            |            |            |            |
|-----------|-----------------|----------------|------------|------------|------------|------------|------------|------------|
| C3        | ENSG00000125730 | protein_coding | 102650.517 | 3.73173755 | 0.18332815 | 20.3555072 | 4.1493E-92 | 4.5724E-90 |
| TNFSF14   | ENSG00000125735 | protein_coding | 392.095424 | 3.77583674 | 0.20364897 | 18.5409075 | 9.6578E-77 | 6.0481E-75 |
| TGM3      | ENSG00000125780 | protein_coding | 13.0082396 | 1.80210583 | 0.21354437 | 8.43902307 | 3.2E-17    | 1.584E-16  |
| CD93      | ENSG00000125810 | protein_coding | 16106.755  | 1.04721632 | 0.1144977  | 9.14617753 | 5.8984E-20 | 3.437E-19  |
| NKX2-2    | ENSG00000125820 | protein_coding | 3.43316795 | 1.89288357 | 0.40930323 | 4.62464848 | 3.7523E-06 | 8.1348E-06 |
| CSTL1     | ENSG00000125823 | protein_coding | 1.09371402 | 1.84728587 | 0.55789434 | 3.31117512 | 0.00092905 | 0.00157328 |
| RBCK1     | ENSG00000125826 | protein_coding | 7167.08201 | 1.19351836 | 0.09464801 | 12.6100738 | 1.8582E-36 | 2.5067E-35 |
| TMEM74B   | ENSG00000125895 | protein_coding | 336.850487 | 3.71798459 | 0.14467828 | 25.6982913 | 1.221E-145 | 7.272E-143 |
| FAM110A   | ENSG00000125898 | protein_coding | 648.179332 | 1.12242278 | 0.07754722 | 14.4740564 | 1.7673E-47 | 3.7665E-46 |
| SIRPD     | ENSG00000125900 | protein_coding | 8.18593868 | 3.14341591 | 0.22391341 | 14.0385338 | 9.0567E-45 | 1.7213E-43 |
| S1PR4     | ENSG00000125910 | protein_coding | 229.671618 | 1.8118296  | 0.11775712 | 15.3861572 | 2.0272E-53 | 5.4728E-52 |
| C20orf173 | ENSG00000125975 | protein_coding | 1.17674065 | 2.40877773 | 0.38437745 | 6.26669883 | 3.6878E-10 | 1.1265E-09 |
| BPIFB1    | ENSG00000125999 | protein_coding | 10.3799563 | 2.69002023 | 0.37107765 | 7.24921121 | 4.1921E-13 | 1.5805E-12 |
| GRPR      | ENSG00000126010 | protein_coding | 27.9719763 | 1.95138471 | 0.23190574 | 8.41455966 | 3.9437E-17 | 1.9414E-16 |
| XRCC3     | ENSG00000126215 | protein_coding | 396.698791 | 1.44695988 | 0.10481758 | 13.8045539 | 2.3925E-43 | 4.3077E-42 |
| MCF2L     | ENSG00000126217 | protein_coding | 4021.61567 | 1.14114866 | 0.10069194 | 11.3330683 | 8.9996E-30 | 8.8303E-29 |
| F10       | ENSG00000126218 | protein_coding | 627.441812 | 1.19775053 | 0.2272523  | 5.27057599 | 1.36E-07   | 3.3591E-07 |
| SLURP1    | ENSG00000126233 | protein_coding | 0.36071098 | 1.02917669 | 0.37469772 | 2.74668524 | 0.00602009 | 0.00928306 |
| IGFLR1    | ENSG00000126246 | protein_coding | 135.292204 | 1.64885825 | 0.13352653 | 12.3485446 | 4.9601E-35 | 6.2448E-34 |
| GPR42     | ENSG00000126251 | protein_coding | 1.52163643 | 2.7453724  | 0.39754689 | 6.90578261 | 4.9927E-12 | 1.747E-11  |
| FFAR2     | ENSG00000126262 | protein_coding | 29.9286743 | 1.76209167 | 0.16064074 | 10.9691458 | 5.3778E-28 | 4.8281E-27 |
| HCST      | ENSG00000126264 | protein_coding | 329.056429 | 2.01007687 | 0.14255875 | 14.0999896 | 3.7983E-45 | 7.3436E-44 |
| KRT36     | ENSG00000126337 | protein_coding | 7.10214256 | 3.72976869 | 0.2663261  | 14.0045184 | 1.4627E-44 | 2.7616E-43 |
| CCR7      | ENSG00000126353 | protein_coding | 214.981496 | 1.61851604 | 0.1575337  | 10.2740938 | 9.2207E-25 | 6.9601E-24 |
| TSKS      | ENSG00000126467 | protein_coding | 12.3679297 | 1.41939873 | 0.1749359  | 8.1138218  | 4.9052E-16 | 2.2513E-15 |

|        |                 |                |            |            |            |            |            |            |
|--------|-----------------|----------------|------------|------------|------------|------------|------------|------------|
| PRKCG  | ENSG00000126583 | protein_coding | 5.9589842  | 2.42811138 | 0.31463502 | 7.71723175 | 1.1888E-14 | 4.9851E-14 |
| SSX1   | ENSG00000126752 | protein_coding | 2.45048376 | 2.26275161 | 0.59337847 | 3.8133362  | 0.0001371  | 0.00025438 |
| CFP    | ENSG00000126759 | protein_coding | 213.339498 | 1.30001123 | 0.11664499 | 11.1450243 | 7.5724E-29 | 7.1088E-28 |
| SIX1   | ENSG00000126778 | protein_coding | 131.815125 | 2.46034791 | 0.1632407  | 15.0719028 | 2.4787E-51 | 6.1787E-50 |
| DLGAP5 | ENSG00000126787 | protein_coding | 188.016849 | 2.71960498 | 0.15165816 | 17.9324676 | 6.5794E-72 | 3.3926E-70 |
| PZP    | ENSG00000126838 | protein_coding | 44.2597361 | 1.56184224 | 0.16096337 | 9.70309115 | 2.925E-22  | 1.9271E-21 |
| EVI2A  | ENSG00000126860 | protein_coding | 810.851811 | 1.86469805 | 0.12342986 | 15.1073499 | 1.4485E-51 | 3.6424E-50 |
| OMG    | ENSG00000126861 | protein_coding | 38.0514938 | 2.3174895  | 0.18807423 | 12.3222065 | 6.8786E-35 | 8.6107E-34 |
| FAM78A | ENSG00000126882 | protein_coding | 855.939642 | 2.3586546  | 0.09876663 | 23.8810872 | 4.816E-126 | 1.611E-123 |
| NXF5   | ENSG00000126952 | protein_coding | 9.12280677 | 2.02200604 | 0.21325376 | 9.48168988 | 2.502E-21  | 1.5714E-20 |
| RGS13  | ENSG00000127074 | protein_coding | 25.2864384 | 1.83108529 | 0.16490794 | 11.1036816 | 1.2038E-28 | 1.1162E-27 |
| BCL11B | ENSG00000127152 | protein_coding | 425.09361  | 1.5928001  | 0.13493917 | 11.803838  | 3.7291E-32 | 4.1004E-31 |
| TRAF2  | ENSG00000127191 | protein_coding | 1183.14352 | 1.03123587 | 0.07024926 | 14.6796686 | 8.7015E-49 | 1.9649E-47 |
| MASP1  | ENSG00000127241 | protein_coding | 2754.03175 | 1.97329835 | 0.16539878 | 11.9305493 | 8.203E-33  | 9.294E-32  |
| IL22   | ENSG00000127318 | protein_coding | 0.90508931 | 1.80461004 | 0.39697826 | 4.54586619 | 5.471E-06  | 1.1678E-05 |
| TAS2R3 | ENSG00000127362 | protein_coding | 3.38174107 | 1.24469106 | 0.22313885 | 5.57810103 | 2.4316E-08 | 6.3907E-08 |
| TAS2R4 | ENSG00000127364 | protein_coding | 37.5840048 | 1.45083742 | 0.15135117 | 9.58590186 | 9.1653E-22 | 5.896E-21  |
| TAS2R5 | ENSG00000127366 | protein_coding | 39.2360718 | 1.9219853  | 0.14016422 | 13.712382  | 8.5601E-43 | 1.5075E-41 |
| IDUA   | ENSG00000127415 | protein_coding | 777.855681 | 1.23464741 | 0.10341492 | 11.9387748 | 7.431E-33  | 8.4401E-32 |
| PLA2G5 | ENSG00000127472 | protein_coding | 47.1825572 | 2.7861614  | 0.2003331  | 13.9076435 | 5.6924E-44 | 1.0535E-42 |
| ADGRE2 | ENSG00000127507 | protein_coding | 676.588227 | 1.81159576 | 0.13191067 | 13.7335047 | 6.3963E-43 | 1.133E-41  |
| F2RL3  | ENSG00000127533 | protein_coding | 1748.04759 | 2.33283815 | 0.17191264 | 13.5699049 | 6.04E-42   | 1.0194E-40 |
| PKMYT1 | ENSG00000127564 | protein_coding | 137.876676 | 2.93399333 | 0.14126822 | 20.7689553 | 8.2636E-96 | 1.0581E-93 |
| WFIKK1 | ENSG00000127578 | protein_coding | 205.43964  | 1.28096484 | 0.18083465 | 7.08362486 | 1.4043E-12 | 5.1185E-12 |
| FBXL16 | ENSG00000127585 | protein_coding | 2759.5793  | 1.5756379  | 0.15938846 | 9.88552044 | 4.8108E-23 | 3.3048E-22 |



|          |                 |                |            |            |            |            |            |            |
|----------|-----------------|----------------|------------|------------|------------|------------|------------|------------|
| CHTF18   | ENSG00000127586 | protein_coding | 436.815305 | 1.53632767 | 0.11823155 | 12.9942271 | 1.3193E-38 | 1.9409E-37 |
| GNG13    | ENSG00000127588 | protein_coding | 0.61320378 | 1.31040347 | 0.33807202 | 3.87610746 | 0.00010614 | 0.00019932 |
| GNGT1    | ENSG00000127928 | protein_coding | 77.0402097 | 2.23277172 | 0.2521898  | 8.85353704 | 8.4789E-19 | 4.626E-18  |
| STEAP4   | ENSG00000127954 | protein_coding | 3005.95208 | 1.27141682 | 0.16127177 | 7.88369103 | 3.1785E-15 | 1.3841E-14 |
| LRFN1    | ENSG00000128011 | protein_coding | 111.080711 | 1.19048953 | 0.11317982 | 10.5185669 | 7.0944E-26 | 5.7036E-25 |
| SPINK2   | ENSG00000128040 | protein_coding | 14.8478352 | 1.43951859 | 0.29717825 | 4.84395672 | 1.2728E-06 | 2.8836E-06 |
| KDR      | ENSG00000128052 | protein_coding | 14102.297  | 1.12458962 | 0.13452435 | 8.35974768 | 6.2853E-17 | 3.0547E-16 |
| GAL3ST1  | ENSG00000128242 | protein_coding | 8473.30961 | 2.92327548 | 0.15293529 | 19.1144598 | 1.9139E-81 | 1.4015E-79 |
| RFPL2    | ENSG00000128253 | protein_coding | 11.2712325 | 1.47003492 | 0.20843674 | 7.05266687 | 1.7552E-12 | 6.35E-12   |
| MGAT3    | ENSG00000128268 | protein_coding | 1657.10768 | 1.27459714 | 0.16611822 | 7.67283155 | 1.6824E-14 | 6.9807E-14 |
| ADORA2A  | ENSG00000128271 | protein_coding | 62.7812213 | 1.38716749 | 0.11479895 | 12.0834508 | 1.2918E-33 | 1.5235E-32 |
| RFPL3    | ENSG00000128276 | protein_coding | 3.56690106 | 1.44913125 | 0.18690567 | 7.75327592 | 8.9552E-15 | 3.7884E-14 |
| MCHR1    | ENSG00000128285 | protein_coding | 693.243243 | 5.71412831 | 0.28596865 | 19.9816599 | 7.9535E-89 | 7.6275E-87 |
| BAIAP2L2 | ENSG00000128298 | protein_coding | 1436.66361 | 1.15682327 | 0.16769605 | 6.89833329 | 5.2616E-12 | 1.8378E-11 |
| GALR3    | ENSG00000128310 | protein_coding | 1.28860344 | 1.37159158 | 0.35796168 | 3.83167153 | 0.00012728 | 0.00023695 |
| APOL5    | ENSG00000128313 | protein_coding | 12.5904072 | 3.98044768 | 0.24577134 | 16.195736  | 5.4047E-59 | 1.776E-57  |
| IGLL1    | ENSG00000128322 | protein_coding | 4.0021331  | 1.53533268 | 0.28956948 | 5.30212189 | 1.1446E-07 | 2.846E-07  |
| APOL2    | ENSG00000128335 | protein_coding | 5737.02139 | 1.36865    | 0.11156038 | 12.2682443 | 1.3413E-34 | 1.6569E-33 |
| RAC2     | ENSG00000128340 | protein_coding | 2302.38811 | 2.07446636 | 0.13287876 | 15.6117227 | 6.0579E-55 | 1.7184E-53 |
| APOBEC3A | ENSG00000128383 | protein_coding | 56.6977688 | 1.17430157 | 0.15481825 | 7.58503326 | 3.324E-14  | 1.3521E-13 |
| APOBEC3F | ENSG00000128394 | protein_coding | 460.672208 | 1.09727625 | 0.06886976 | 15.9326268 | 3.7621E-57 | 1.1551E-55 |
| KRT17    | ENSG00000128422 | protein_coding | 341.64303  | 1.01261906 | 0.26157693 | 3.87120941 | 0.0001083  | 0.00020319 |
| CPA4     | ENSG00000128510 | protein_coding | 202.412516 | 2.64119713 | 0.30907417 | 8.54551231 | 1.2797E-17 | 6.4886E-17 |
| CDHR3    | ENSG00000128536 | protein_coding | 493.296067 | 1.40234528 | 0.10999393 | 12.7492965 | 3.1457E-37 | 4.3911E-36 |
| LRRC17   | ENSG00000128606 | protein_coding | 498.596638 | 1.61324248 | 0.13519125 | 11.9330395 | 7.9613E-33 | 9.0268E-32 |

|          |                 |                |            |            |            |            |            |            |
|----------|-----------------|----------------|------------|------------|------------|------------|------------|------------|
| HOXD13   | ENSG00000128714 | protein_coding | 26.7702657 | 3.17098458 | 0.225996   | 14.0311533 | 1.005E-44  | 1.907E-43  |
| ARHGAP22 | ENSG00000128805 | protein_coding | 432.62949  | 2.7477062  | 0.10676099 | 25.7369862 | 4.509E-146 | 2.793E-143 |
| WDFY4    | ENSG00000128815 | protein_coding | 929.336476 | 1.7375292  | 0.13585386 | 12.7896933 | 1.8721E-37 | 2.6382E-36 |
| DLL4     | ENSG00000128917 | protein_coding | 5096.34512 | 2.41609707 | 0.12502763 | 19.3245045 | 3.3418E-83 | 2.579E-81  |
| MYOD1    | ENSG00000129152 | protein_coding | 2.20239066 | 3.6070511  | 0.43669735 | 8.25984199 | 1.4587E-16 | 6.9284E-16 |
| KCNC1    | ENSG00000129159 | protein_coding | 8.3056034  | 1.20267223 | 0.17266798 | 6.96523033 | 3.2787E-12 | 1.1622E-11 |
| CSRP3    | ENSG00000129170 | protein_coding | 1.44744025 | 2.70839092 | 0.37276842 | 7.26561265 | 3.7135E-13 | 1.4052E-12 |
| E2F8     | ENSG00000129173 | protein_coding | 114.517112 | 2.64281416 | 0.16431412 | 16.0839136 | 3.308E-58  | 1.056E-56  |
| PIMREG   | ENSG00000129195 | protein_coding | 115.41763  | 2.29712451 | 0.14901873 | 15.4150058 | 1.2976E-53 | 3.5281E-52 |
| AIPL1    | ENSG00000129221 | protein_coding | 1.86666523 | 2.49948114 | 0.38211075 | 6.54124786 | 6.1008E-11 | 1.9739E-10 |
| CD68     | ENSG00000129226 | protein_coding | 228.756162 | 3.15859394 | 0.14845111 | 21.276998  | 1.854E-100 | 2.7963E-98 |
| KLK14    | ENSG00000129437 | protein_coding | 11.0199285 | 1.97409153 | 0.21138947 | 9.33864653 | 9.7573E-21 | 5.9235E-20 |
| SIGLEC9  | ENSG00000129450 | protein_coding | 283.161836 | 2.30052256 | 0.11635325 | 19.7718807 | 5.2001E-87 | 4.6649E-85 |
| EGLN3    | ENSG00000129521 | protein_coding | 29590.0663 | 4.24159398 | 0.1313917  | 32.2820542 | 1.249E-228 | 5.207E-225 |
| RHBDF2   | ENSG00000129667 | protein_coding | 2956.9943  | 1.9445136  | 0.07996756 | 24.3162806 | 1.319E-130 | 5.08E-128  |
| AANAT    | ENSG00000129673 | protein_coding | 19.1420926 | 2.62286876 | 0.17333412 | 15.1318666 | 9.9823E-52 | 2.5282E-50 |
| ARHGEF6  | ENSG00000129675 | protein_coding | 2729.04659 | 1.15382256 | 0.07474092 | 15.4376276 | 9.1401E-54 | 2.4955E-52 |
| SGO1     | ENSG00000129810 | protein_coding | 56.0676402 | 1.037296   | 0.1327003  | 7.81683218 | 5.4169E-15 | 2.3257E-14 |
| CDH15    | ENSG00000129910 | protein_coding | 29.8551793 | 1.27126196 | 0.26154883 | 4.86051478 | 1.1708E-06 | 2.6608E-06 |
| SHC2     | ENSG00000129946 | protein_coding | 1284.83255 | 1.31101247 | 0.12631849 | 10.378627  | 3.102E-25  | 2.4069E-24 |
| PLPPR3   | ENSG00000129951 | protein_coding | 8.4473961  | 1.8647468  | 0.26550938 | 7.02328029 | 2.1672E-12 | 7.7864E-12 |
| LBP      | ENSG00000129988 | protein_coding | 1409.49944 | 3.39956878 | 0.37359503 | 9.09960934 | 9.0657E-20 | 5.2183E-19 |
| SYT5     | ENSG00000129990 | protein_coding | 12.5321051 | 1.66806666 | 0.22235156 | 7.50193367 | 6.2883E-14 | 2.5156E-13 |
| TNNI3    | ENSG00000129991 | protein_coding | 11.4719646 | 2.50455047 | 0.41378739 | 6.05274717 | 1.424E-09  | 4.1516E-09 |
| CBFA2T3  | ENSG00000129993 | protein_coding | 229.028121 | 1.033501   | 0.10776763 | 9.59008772 | 8.801E-22  | 5.6632E-21 |

|          |                 |                |            |            |            |            |            |            |
|----------|-----------------|----------------|------------|------------|------------|------------|------------|------------|
| CRACR2A  | ENSG00000130038 | protein_coding | 257.667848 | 2.15312438 | 0.11610135 | 18.5452137 | 8.9146E-77 | 5.6134E-75 |
| NXNL2    | ENSG00000130045 | protein_coding | 356.300123 | 1.08468263 | 0.14086438 | 7.70019081 | 1.3586E-14 | 5.6691E-14 |
| DOCK6    | ENSG00000130158 | protein_coding | 5430.35088 | 1.17016159 | 0.0859015  | 13.6221321 | 2.958E-42  | 5.0691E-41 |
| TSPAN16  | ENSG00000130167 | protein_coding | 5.25731462 | 2.60704487 | 0.26500206 | 9.8378288  | 7.7362E-23 | 5.2539E-22 |
| ANGPTL8  | ENSG00000130173 | protein_coding | 66.976791  | 3.24439166 | 0.28706335 | 11.3020058 | 1.2825E-29 | 1.2507E-28 |
| ZSCAN10  | ENSG00000130182 | protein_coding | 1.93243929 | 2.11084884 | 0.36035699 | 5.85766025 | 4.6943E-09 | 1.311E-08  |
| APOC1    | ENSG00000130208 | protein_coding | 5901.84452 | 5.20854927 | 0.19078208 | 27.3010406 | 4.123E-164 | 4.021E-161 |
| RPL36    | ENSG00000130255 | protein_coding | 20501.129  | 1.25886369 | 0.104405   | 12.0575041 | 1.7707E-33 | 2.0717E-32 |
| ATP8B3   | ENSG00000130270 | protein_coding | 633.031713 | 4.22179252 | 0.20804492 | 20.2926971 | 1.4918E-91 | 1.583E-89  |
| NCAN     | ENSG00000130287 | protein_coding | 5.30279452 | 1.83120239 | 0.25624153 | 7.14639198 | 8.9088E-13 | 3.29E-12   |
| PLVAP    | ENSG00000130300 | protein_coding | 43062.4696 | 1.93339662 | 0.12593988 | 15.351742  | 3.448E-53  | 9.2325E-52 |
| BST2     | ENSG00000130303 | protein_coding | 8303.23617 | 1.32301038 | 0.11541408 | 11.463163  | 2.02E-30   | 2.041E-29  |
| COLGALT1 | ENSG00000130309 | protein_coding | 7579.7691  | 1.71378977 | 0.0728318  | 23.5307887 | 1.975E-122 | 5.917E-120 |
| EPO      | ENSG00000130427 | protein_coding | 542.7597   | 4.91086011 | 0.35877657 | 13.6877948 | 1.201E-42  | 2.0965E-41 |
| ARPC1B   | ENSG00000130429 | protein_coding | 7446.65678 | 1.02518834 | 0.09368925 | 10.9424332 | 7.2235E-28 | 6.4473E-27 |
| FCHO1    | ENSG00000130475 | protein_coding | 337.184107 | 2.62522033 | 0.14946654 | 17.5639332 | 4.6536E-69 | 2.1614E-67 |
| PXDN     | ENSG00000130508 | protein_coding | 7802.22704 | 1.66556974 | 0.12453614 | 13.374188  | 8.5583E-41 | 1.3761E-39 |
| SULT4A1  | ENSG00000130540 | protein_coding | 47.2020937 | 2.52231257 | 0.31975189 | 7.88834299 | 3.0623E-15 | 1.3356E-14 |
| SAG      | ENSG00000130561 | protein_coding | 5.20666502 | 2.3336874  | 0.28169712 | 8.28438494 | 1.1872E-16 | 5.672E-16  |
| LSP1     | ENSG00000130592 | protein_coding | 2891.01955 | 2.24044766 | 0.12622445 | 17.7497119 | 1.7324E-70 | 8.4936E-69 |
| TNNT3    | ENSG00000130595 | protein_coding | 56.2991084 | 2.34107517 | 0.26520729 | 8.8273408  | 1.0719E-18 | 5.8111E-18 |
| TNNI2    | ENSG00000130598 | protein_coding | 40.9496423 | 2.4407336  | 0.15572758 | 15.673098  | 2.3104E-55 | 6.6485E-54 |
| COL5A1   | ENSG00000130635 | protein_coding | 7192.07039 | 2.02519097 | 0.1811324  | 11.1807217 | 5.0676E-29 | 4.8027E-28 |
| CALY     | ENSG00000130643 | protein_coding | 7.53612497 | 2.17030498 | 0.27525131 | 7.88481249 | 3.1501E-15 | 1.3725E-14 |
| PNPLA7   | ENSG00000130653 | protein_coding | 895.287523 | 1.53663891 | 0.14139245 | 10.8678989 | 1.6393E-27 | 1.4336E-26 |

|         |                 |                |            |            |            |            |            |            |
|---------|-----------------|----------------|------------|------------|------------|------------|------------|------------|
| MNX1    | ENSG00000130675 | protein_coding | 32.2746801 | 2.49887028 | 0.27100558 | 9.22073378 | 2.9507E-20 | 1.7427E-19 |
| ZNF337  | ENSG00000130684 | protein_coding | 220.590713 | 1.28332811 | 0.09688964 | 13.2452562 | 4.8064E-40 | 7.4891E-39 |
| PRDM12  | ENSG00000130711 | protein_coding | 3.14935569 | 1.14299241 | 0.22668174 | 5.04227824 | 4.6002E-07 | 1.0866E-06 |
| FIBCD1  | ENSG00000130720 | protein_coding | 184.833137 | 4.38573807 | 0.29659069 | 14.7871739 | 1.7724E-49 | 4.0993E-48 |
| METTL26 | ENSG00000130731 | protein_coding | 4022.32938 | 1.57691025 | 0.11346213 | 13.8981196 | 6.5027E-44 | 1.1967E-42 |
| GMFG    | ENSG00000130755 | protein_coding | 1950.753   | 1.83884291 | 0.0936111  | 19.6434285 | 6.5802E-86 | 5.6914E-84 |
| THEMIS2 | ENSG00000130775 | protein_coding | 2133.75237 | 2.05356493 | 0.10876062 | 18.8815116 | 1.6189E-79 | 1.1109E-77 |
| SLC6A8  | ENSG00000130821 | protein_coding | 24195.9369 | 1.62986106 | 0.13358792 | 12.2006619 | 3.0831E-34 | 3.7409E-33 |
| PNCK    | ENSG00000130822 | protein_coding | 6535.51027 | 6.61560797 | 0.25446614 | 25.9979896 | 5.218E-149 | 3.624E-146 |
| PLXNA3  | ENSG00000130827 | protein_coding | 2304.91084 | 1.34365122 | 0.09488518 | 14.1608125 | 1.6013E-45 | 3.1464E-44 |
| HSD17B3 | ENSG00000130948 | protein_coding | 78.0891808 | 3.03844193 | 0.20564027 | 14.7755197 | 2.1073E-49 | 4.8664E-48 |
| ULBP2   | ENSG00000131015 | protein_coding | 84.5348406 | 1.03455935 | 0.11943037 | 8.66244774 | 4.6174E-18 | 2.4089E-17 |
| LILRB2  | ENSG00000131042 | protein_coding | 821.892842 | 2.27349193 | 0.10945682 | 20.7706745 | 7.9731E-96 | 1.0238E-93 |
| COX4I2  | ENSG00000131055 | protein_coding | 711.025739 | 2.86641841 | 0.17343583 | 16.5272566 | 2.3353E-61 | 8.2413E-60 |
| DEFB118 | ENSG00000131068 | protein_coding | 1.16831399 | 2.71382329 | 0.49099232 | 5.52722144 | 3.2534E-08 | 8.4628E-08 |
| EDA2R   | ENSG00000131080 | protein_coding | 1000.28343 | 2.2815041  | 0.09166781 | 24.8888243 | 9.831E-137 | 4.552E-134 |
| C1QL1   | ENSG00000131094 | protein_coding | 1883.2321  | 3.67994185 | 0.26860205 | 13.7003491 | 1.0104E-42 | 1.7712E-41 |
| GFAP    | ENSG00000131095 | protein_coding | 125.828819 | 1.39385968 | 0.19146094 | 7.2801257  | 3.3351E-13 | 1.2669E-12 |
| HIGD1B  | ENSG00000131097 | protein_coding | 297.771728 | 1.68025297 | 0.14442626 | 11.6339853 | 2.7686E-31 | 2.9223E-30 |
| TEX101  | ENSG00000131126 | protein_coding | 4.47735215 | 1.99680302 | 0.38273176 | 5.21723889 | 1.8161E-07 | 4.4434E-07 |
| CCL25   | ENSG00000131142 | protein_coding | 4.99648315 | 3.12925005 | 0.33406068 | 9.36731043 | 7.4404E-21 | 4.5434E-20 |
| GIN52   | ENSG00000131153 | protein_coding | 339.218807 | 1.90850471 | 0.108223   | 17.6349265 | 1.3287E-69 | 6.2987E-68 |
| F12     | ENSG00000131187 | protein_coding | 301.793312 | 1.5708119  | 0.20095251 | 7.81683137 | 5.417E-15  | 2.3257E-14 |
| PRR7    | ENSG00000131188 | protein_coding | 166.525298 | 2.37948583 | 0.15178755 | 15.6764231 | 2.1926E-55 | 6.3174E-54 |
| IDO1    | ENSG00000131203 | protein_coding | 2056.15    | 3.94755403 | 0.16530491 | 23.8804404 | 4.891E-126 | 1.625E-123 |

|         |                 |                |            |            |            |            |            |            |
|---------|-----------------|----------------|------------|------------|------------|------------|------------|------------|
| ADGRE3  | ENSG00000131355 | protein_coding | 28.9657116 | 1.19165903 | 0.16320247 | 7.30172179 | 2.8411E-13 | 1.084E-12  |
| LRRC4B  | ENSG00000131409 | protein_coding | 180.052629 | 1.01250391 | 0.12770243 | 7.92861879 | 2.216E-15  | 9.7675E-15 |
| ACLY    | ENSG00000131473 | protein_coding | 24331.3506 | 1.34145495 | 0.0825603  | 16.248184  | 2.3008E-59 | 7.6483E-58 |
| ANKHD1  | ENSG00000131503 | protein_coding | 443.421095 | 1.00589472 | 0.07828527 | 12.8490939 | 8.7024E-38 | 1.2416E-36 |
| ANO1    | ENSG00000131620 | protein_coding | 2927.41814 | 1.82393426 | 0.12464791 | 14.6326905 | 1.7378E-48 | 3.8765E-47 |
| KREMEN2 | ENSG00000131650 | protein_coding | 21.7721352 | 2.79684759 | 0.21893882 | 12.7745621 | 2.2742E-37 | 3.195E-36  |
| THOC6   | ENSG00000131652 | protein_coding | 1472.48065 | 1.09471381 | 0.0791932  | 13.8233315 | 1.8434E-43 | 3.3374E-42 |
| BARX1   | ENSG00000131668 | protein_coding | 9.3598769  | 3.60486825 | 0.38231724 | 9.42899746 | 4.1403E-21 | 2.5686E-20 |
| CA6     | ENSG00000131686 | protein_coding | 2.3923445  | 2.87909752 | 0.29999239 | 9.59723527 | 8.2118E-22 | 5.2944E-21 |
| RHOXF2  | ENSG00000131721 | protein_coding | 0.7463691  | 2.01403709 | 0.67125519 | 3.0004045  | 0.00269621 | 0.00433628 |
| KRT34   | ENSG00000131737 | protein_coding | 2.97513187 | 1.84896085 | 0.43096081 | 4.29032247 | 1.7841E-05 | 3.6237E-05 |
| KRT33B  | ENSG00000131738 | protein_coding | 3.87299215 | 2.38620488 | 0.35394468 | 6.74174534 | 1.565E-11  | 5.2874E-11 |
| TOP2A   | ENSG00000131747 | protein_coding | 1287.06184 | 2.31186248 | 0.14391866 | 16.0636743 | 4.5856E-58 | 1.4608E-56 |
| RARA    | ENSG00000131759 | protein_coding | 3885.73943 | 1.03674514 | 0.08402162 | 12.339028  | 5.5826E-35 | 7.0074E-34 |
| USP29   | ENSG00000131864 | protein_coding | 0.85801814 | 1.95170636 | 0.41785373 | 4.6707884  | 3.0005E-06 | 6.5672E-06 |
| LIN28A  | ENSG00000131914 | protein_coding | 2.32791143 | 1.69453145 | 0.37406426 | 4.53005443 | 5.8968E-06 | 1.255E-05  |
| LGALS3  | ENSG00000131981 | protein_coding | 13287.9405 | 1.34269568 | 0.14103896 | 9.52003374 | 1.7312E-21 | 1.0969E-20 |
| PODNL1  | ENSG00000132000 | protein_coding | 170.100857 | 2.56431045 | 0.23507248 | 10.908595  | 1.0486E-27 | 9.2855E-27 |
| RTBDN   | ENSG00000132026 | protein_coding | 4.28814191 | 1.9150221  | 0.35690168 | 5.36568536 | 8.0642E-08 | 2.0336E-07 |
| LRRC41  | ENSG00000132128 | protein_coding | 9584.00319 | 1.10570242 | 0.10986755 | 10.0639585 | 7.9727E-24 | 5.7123E-23 |
| HSD17B7 | ENSG00000132196 | protein_coding | 762.990507 | 1.6362874  | 0.11166206 | 14.6539248 | 1.2715E-48 | 2.8461E-47 |
| EMILIN2 | ENSG00000132205 | protein_coding | 1252.3364  | 1.6716713  | 0.09900892 | 16.8840467 | 5.8961E-64 | 2.2713E-62 |
| SLX1A   | ENSG00000132207 | protein_coding | 1.95247302 | 2.07195261 | 0.31148808 | 6.65178781 | 2.8955E-11 | 9.6031E-11 |
| TRIM22  | ENSG00000132274 | protein_coding | 5673.60923 | 1.36480865 | 0.08846355 | 15.4279203 | 1.0624E-53 | 2.8954E-52 |
| HHLA1   | ENSG00000132297 | protein_coding | 0.63568678 | 1.35422949 | 0.4003007  | 3.38303048 | 0.00071691 | 0.00122896 |

|          |                 |                |            |            |            |            |            |            |
|----------|-----------------|----------------|------------|------------|------------|------------|------------|------------|
| PER2     | ENSG00000132326 | protein_coding | 2591.23282 | 1.13130713 | 0.09224625 | 12.2639903 | 1.4136E-34 | 1.7439E-33 |
| PTPRE    | ENSG00000132334 | protein_coding | 2217.02184 | 1.658037   | 0.07434644 | 22.301497  | 3.573E-110 | 7.584E-108 |
| SERPINF1 | ENSG00000132386 | protein_coding | 3310.54172 | 1.05721328 | 0.18623348 | 5.67681655 | 1.3722E-08 | 3.6856E-08 |
| SEC61G   | ENSG00000132432 | protein_coding | 3088.95106 | 1.11762734 | 0.07728904 | 14.4603592 | 2.1567E-47 | 4.5792E-46 |
| JCHAIN   | ENSG00000132465 | protein_coding | 7559.49539 | 1.26262555 | 0.25357582 | 4.97928216 | 6.3821E-07 | 1.4885E-06 |
| GUCY2D   | ENSG00000132518 | protein_coding | 32.0116645 | 1.51945404 | 0.2216461  | 6.85531588 | 7.1155E-12 | 2.4657E-11 |
| GPS2     | ENSG00000132522 | protein_coding | 300.833519 | 1.46641548 | 0.12475742 | 11.7541342 | 6.7246E-32 | 7.2997E-31 |
| XAF1     | ENSG00000132530 | protein_coding | 832.180208 | 1.96666484 | 0.1359868  | 14.4621746 | 2.1005E-47 | 4.4621E-46 |
| SNAP25   | ENSG00000132639 | protein_coding | 456.92366  | 1.99374345 | 0.16471854 | 12.1039407 | 1.0066E-33 | 1.192E-32  |
| BCAN     | ENSG00000132692 | protein_coding | 123.36591  | 1.76738311 | 0.13801562 | 12.8056748 | 1.524E-37  | 2.1555E-36 |
| CRP      | ENSG00000132693 | protein_coding | 89.5872442 | 4.39478961 | 0.37281339 | 11.7881754 | 4.4917E-32 | 4.9188E-31 |
| HAPLN2   | ENSG00000132702 | protein_coding | 36.0118708 | 1.15434729 | 0.16643748 | 6.93562097 | 4.0444E-12 | 1.4248E-11 |
| FCRL2    | ENSG00000132704 | protein_coding | 21.1748008 | 1.3939593  | 0.25903249 | 5.38140708 | 7.3906E-08 | 1.8705E-07 |
| LPIN3    | ENSG00000132793 | protein_coding | 2394.79453 | 1.54245366 | 0.11791559 | 13.0809984 | 4.2285E-39 | 6.3784E-38 |
| PDE6A    | ENSG00000132915 | protein_coding | 9.84818324 | 1.59182471 | 0.19092183 | 8.33757315 | 7.5831E-17 | 3.6692E-16 |
| TPTE2    | ENSG00000132958 | protein_coding | 8.59261362 | 1.26350531 | 0.2376616  | 5.31640494 | 1.0584E-07 | 2.6391E-07 |
| ALOX5AP  | ENSG00000132965 | protein_coding | 810.41641  | 1.18622167 | 0.12775333 | 9.2852506  | 1.6133E-20 | 9.6976E-20 |
| CHIT1    | ENSG00000133063 | protein_coding | 877.968513 | 5.05285757 | 0.29441719 | 17.1622371 | 5.0914E-66 | 2.116E-64  |
| DCLK1    | ENSG00000133083 | protein_coding | 1670.87778 | 2.1391867  | 0.15735014 | 13.5950732 | 4.2833E-42 | 7.2723E-41 |
| EPSTI1   | ENSG00000133106 | protein_coding | 1641.64632 | 1.0921644  | 0.10814153 | 10.099398  | 5.5582E-24 | 4.0169E-23 |
| POSTN    | ENSG00000133110 | protein_coding | 6928.77767 | 1.54417938 | 0.19460541 | 7.93492537 | 2.1062E-15 | 9.2963E-15 |
| STOML3   | ENSG00000133115 | protein_coding | 8.27557343 | 1.68649184 | 0.28139452 | 5.99333577 | 2.0558E-09 | 5.9181E-09 |
| PRAM1    | ENSG00000133246 | protein_coding | 250.599503 | 2.44663257 | 0.1247762  | 19.6081666 | 1.3169E-85 | 1.1221E-83 |
| KMT5C    | ENSG00000133247 | protein_coding | 385.817838 | 1.26568778 | 0.10443655 | 12.119203  | 8.3568E-34 | 9.9528E-33 |
| LGALS12  | ENSG00000133317 | protein_coding | 284.234275 | 4.1549205  | 0.26180261 | 15.870432  | 1.0154E-56 | 3.0563E-55 |



|          |                 |                |            |            |            |            |            |            |
|----------|-----------------|----------------|------------|------------|------------|------------|------------|------------|
| PLAAT4   | ENSG00000133321 | protein_coding | 5954.14398 | 1.28362634 | 0.13583096 | 9.45017483 | 3.3827E-21 | 2.1071E-20 |
| C1QTNF6  | ENSG00000133466 | protein_coding | 1256.24371 | 2.27339374 | 0.11099089 | 20.4827049 | 3.0712E-93 | 3.5642E-91 |
| GGT2     | ENSG00000133475 | protein_coding | 52.6361037 | 1.53373617 | 0.23776966 | 6.45051262 | 1.1147E-10 | 3.5354E-10 |
| GIMAP4   | ENSG00000133574 | protein_coding | 4744.38771 | 1.29639154 | 0.08616706 | 15.0450949 | 3.718E-51  | 9.2078E-50 |
| KRBA1    | ENSG00000133619 | protein_coding | 3489.17889 | 2.7839468  | 0.1138639  | 24.4497748 | 5.06E-132  | 2.04E-129  |
| SPINK5   | ENSG00000133710 | protein_coding | 216.779602 | 2.12157262 | 0.21400105 | 9.91384221 | 3.6243E-23 | 2.504E-22  |
| CA1      | ENSG00000133742 | protein_coding | 33.9390283 | 3.18515741 | 0.29462089 | 10.8110373 | 3.052E-27  | 2.6397E-26 |
| TEX15    | ENSG00000133863 | protein_coding | 350.183433 | 5.75577558 | 0.31809972 | 18.094249  | 3.5373E-73 | 1.9167E-71 |
| GSC      | ENSG00000133937 | protein_coding | 14.5939968 | 1.89002952 | 0.17764139 | 10.6395785 | 1.9501E-26 | 1.618E-25  |
| LOXL2    | ENSG00000134013 | protein_coding | 6883.87706 | 2.67701216 | 0.15474504 | 17.2995019 | 4.7447E-67 | 2.0461E-65 |
| ADAMDEC1 | ENSG00000134028 | protein_coding | 335.824541 | 4.27394791 | 0.24213598 | 17.6510234 | 9.9929E-70 | 4.7717E-68 |
| CD180    | ENSG00000134061 | protein_coding | 423.603552 | 2.11872169 | 0.14112065 | 15.0135483 | 5.9858E-51 | 1.4705E-49 |
| PTPN22   | ENSG00000134242 | protein_coding | 324.812256 | 2.05770212 | 0.13235214 | 15.5471768 | 1.6628E-54 | 4.6449E-53 |
| WNT2B    | ENSG00000134245 | protein_coding | 591.532269 | 1.20326979 | 0.18546807 | 6.4877465  | 8.713E-11  | 2.7888E-10 |
| CD101    | ENSG00000134256 | protein_coding | 133.695484 | 1.4560607  | 0.11641442 | 12.5075633 | 6.7875E-36 | 8.9051E-35 |
| NGF      | ENSG00000134259 | protein_coding | 415.840107 | 2.11914188 | 0.14530014 | 14.5845829 | 3.5207E-48 | 7.7332E-47 |
| FKBP11   | ENSG00000134285 | protein_coding | 1398.29195 | 1.95205205 | 0.12066316 | 16.1776964 | 7.2455E-59 | 2.3657E-57 |
| LDHA     | ENSG00000134333 | protein_coding | 94559.938  | 1.6734097  | 0.08123237 | 20.6002809 | 2.7286E-94 | 3.2829E-92 |
| SAA2     | ENSG00000134339 | protein_coding | 392.477911 | 3.97800022 | 0.37302408 | 10.6641914 | 1.497E-26  | 1.2499E-25 |
| CFHR5    | ENSG00000134389 | protein_coding | 0.64943386 | 1.7006982  | 0.54667832 | 3.11096697 | 0.00186476 | 0.00305196 |
| ERN2     | ENSG00000134398 | protein_coding | 8.22234947 | 1.37794172 | 0.29251701 | 4.71063793 | 2.4694E-06 | 5.4444E-06 |
| IL2RA    | ENSG00000134460 | protein_coding | 266.35222  | 2.20553121 | 0.18981519 | 11.6193608 | 3.2859E-31 | 3.4516E-30 |
| IL15RA   | ENSG00000134470 | protein_coding | 1133.25341 | 1.46583899 | 0.09501363 | 15.4276699 | 1.0665E-53 | 2.9049E-52 |
| HRH4     | ENSG00000134489 | protein_coding | 6.97273198 | 1.19659709 | 0.1503312  | 7.95973876 | 1.724E-15  | 7.6544E-15 |
| DOCK2    | ENSG00000134516 | protein_coding | 2058.15691 | 2.24088202 | 0.13367695 | 16.7634134 | 4.5192E-63 | 1.6856E-61 |

|         |                 |                |            |            |            |            |            |            |
|---------|-----------------|----------------|------------|------------|------------|------------|------------|------------|
| KLRD1   | ENSG00000134539 | protein_coding | 393.224901 | 2.3197934  | 0.11322453 | 20.4884349 | 2.7303E-93 | 3.1847E-91 |
| KLRC1   | ENSG00000134545 | protein_coding | 33.2851807 | 1.91183343 | 0.16695122 | 11.4514494 | 2.3125E-30 | 2.3313E-29 |
| MYBPC3  | ENSG00000134571 | protein_coding | 14.3817828 | 1.54101398 | 0.19620615 | 7.8540556  | 4.028E-15  | 1.7433E-14 |
| DDB2    | ENSG00000134574 | protein_coding | 2853.17359 | 2.01740903 | 0.06686513 | 30.1713178 | 5.635E-200 | 1.435E-196 |
| RAB33A  | ENSG00000134594 | protein_coding | 103.459385 | 2.13938796 | 0.14979653 | 14.281959  | 2.8352E-46 | 5.7432E-45 |
| SOX3    | ENSG00000134595 | protein_coding | 2.13130605 | 1.25840019 | 0.34665579 | 3.63011442 | 0.0002833  | 0.00050764 |
| PIWIL4  | ENSG00000134627 | protein_coding | 211.808689 | 1.29898555 | 0.10176131 | 12.7650242 | 2.5707E-37 | 3.6027E-36 |
| SPOCD1  | ENSG00000134668 | protein_coding | 71.0594401 | 1.74775178 | 0.19969921 | 8.75192121 | 2.0975E-18 | 1.1161E-17 |
| CDCA8   | ENSG00000134690 | protein_coding | 240.638188 | 1.46922086 | 0.12519867 | 11.7351152 | 8.4212E-32 | 9.1024E-31 |
| CYP2J2  | ENSG00000134716 | protein_coding | 7926.80966 | 5.11050885 | 0.20790362 | 24.5811442 | 2.01E-133  | 8.531E-131 |
| DSG3    | ENSG00000134757 | protein_coding | 5.3050641  | 2.34579986 | 0.40176444 | 5.8387444  | 5.2596E-09 | 1.4631E-08 |
| DSG1    | ENSG00000134760 | protein_coding | 4.6739927  | 1.13048241 | 0.26390666 | 4.28364484 | 1.8386E-05 | 3.7308E-05 |
| SLC43A3 | ENSG00000134802 | protein_coding | 1917.29545 | 1.60267493 | 0.1085967  | 14.7580441 | 2.7309E-49 | 6.2876E-48 |
| CBLIF   | ENSG00000134812 | protein_coding | 2.77743605 | 1.29833417 | 0.33921614 | 3.82745402 | 0.00012948 | 0.0002408  |
| APLNR   | ENSG00000134817 | protein_coding | 3995.8971  | 1.32808381 | 0.16042273 | 8.27865105 | 1.2458E-16 | 5.9475E-16 |
| TCN1    | ENSG00000134827 | protein_coding | 22.8556933 | 2.55761653 | 0.33608528 | 7.61002252 | 2.7405E-14 | 1.1205E-13 |
| COL4A2  | ENSG00000134871 | protein_coding | 66995.886  | 1.52014223 | 0.10756495 | 14.1323199 | 2.401E-45  | 4.6836E-44 |
| POGLUT2 | ENSG00000134901 | protein_coding | 938.196662 | 1.21690217 | 0.09437504 | 12.8943224 | 4.845E-38  | 6.9887E-37 |
| ACRV1   | ENSG00000134940 | protein_coding | 7.94764536 | 1.90771392 | 0.16885124 | 11.2981931 | 1.3395E-29 | 1.3048E-28 |
| ETS1    | ENSG00000134954 | protein_coding | 17261.3821 | 1.13586003 | 0.09505678 | 11.9492801 | 6.549E-33  | 7.4569E-32 |
| SLC37A2 | ENSG00000134955 | protein_coding | 1077.54645 | 2.72548597 | 0.12704693 | 21.452592  | 4.319E-102 | 6.996E-100 |
| ANXA1   | ENSG00000135046 | protein_coding | 10491.6537 | 1.32370365 | 0.09890294 | 13.3838649 | 7.5136E-41 | 1.2132E-39 |
| CEMIP2  | ENSG00000135048 | protein_coding | 7215.352   | 1.22881776 | 0.07867475 | 15.61896   | 5.4081E-55 | 1.5389E-53 |
| ADAM19  | ENSG00000135074 | protein_coding | 1002.81183 | 1.57708132 | 0.12126279 | 13.0054845 | 1.1387E-38 | 1.678E-37  |
| HAVCR2  | ENSG00000135077 | protein_coding | 4695.94009 | 1.81712641 | 0.16852891 | 10.7822831 | 4.174E-27  | 3.5845E-26 |

|          |                 |                |            |            |            |            |            |            |
|----------|-----------------|----------------|------------|------------|------------|------------|------------|------------|
| SDS      | ENSG00000135094 | protein_coding | 768.19253  | 4.24293413 | 0.17213497 | 24.6488788 | 3.783E-134 | 1.621E-131 |
| OASL     | ENSG00000135114 | protein_coding | 597.270534 | 1.57047042 | 0.14201791 | 11.058256  | 1.9995E-28 | 1.8317E-27 |
| OCM2     | ENSG00000135175 | protein_coding | 0.49108357 | 1.58518735 | 0.49604119 | 3.19567688 | 0.00139503 | 0.00231685 |
| CCDC146  | ENSG00000135205 | protein_coding | 4315.00927 | 1.96122254 | 0.22529299 | 8.70520904 | 3.1699E-18 | 1.6702E-17 |
| CD36     | ENSG00000135218 | protein_coding | 8515.4542  | 2.16728677 | 0.15541867 | 13.9448292 | 3.3826E-44 | 6.3007E-43 |
| HILPDA   | ENSG00000135245 | protein_coding | 11830.3921 | 4.7365178  | 0.14861323 | 31.8714418 | 6.643E-223 | 2.538E-219 |
| PRPH     | ENSG00000135406 | protein_coding | 82.0957755 | 1.93678471 | 0.25849148 | 7.49264431 | 6.75E-14   | 2.6953E-13 |
| TESPA1   | ENSG00000135426 | protein_coding | 285.244897 | 2.44173836 | 0.15106317 | 16.1636902 | 9.095E-59  | 2.9548E-57 |
| RDH5     | ENSG00000135437 | protein_coding | 339.264892 | 1.21929667 | 0.13211216 | 9.22925407 | 2.7252E-20 | 1.6138E-19 |
| AGAP2    | ENSG00000135439 | protein_coding | 395.179047 | 2.68973731 | 0.10539037 | 25.52166   | 1.133E-143 | 6.042E-141 |
| TROAP    | ENSG00000135451 | protein_coding | 175.217028 | 3.23883772 | 0.16448675 | 19.6905697 | 2.5975E-86 | 2.2855E-84 |
| B4GALNT1 | ENSG00000135454 | protein_coding | 860.731324 | 3.98023464 | 0.24496567 | 16.2481326 | 2.3027E-59 | 7.6492E-58 |
| SLC26A10 | ENSG00000135502 | protein_coding | 29.5706425 | 2.76149537 | 0.21792232 | 12.6719256 | 8.4612E-37 | 1.1595E-35 |
| MIP      | ENSG00000135517 | protein_coding | 6.39325233 | 1.13293922 | 0.17219895 | 6.57924583 | 4.7284E-11 | 1.5436E-10 |
| HEY2     | ENSG00000135547 | protein_coding | 746.369063 | 1.28239417 | 0.11698791 | 10.9617671 | 5.8349E-28 | 5.2272E-27 |
| PKIB     | ENSG00000135549 | protein_coding | 289.448549 | 1.05706013 | 0.1482326  | 7.13109061 | 9.9577E-13 | 3.6632E-12 |
| TAAR5    | ENSG00000135569 | protein_coding | 0.61699219 | 1.97853008 | 0.53144077 | 3.722955   | 0.0001969  | 0.00035928 |
| MICAL1   | ENSG00000135596 | protein_coding | 2422.78155 | 1.46092757 | 0.09406176 | 15.5315774 | 2.121E-54  | 5.8962E-53 |
| DYSF     | ENSG00000135636 | protein_coding | 8530.72531 | 1.4663792  | 0.09952863 | 14.7332405 | 3.9433E-49 | 9.0113E-48 |
| CCDC142  | ENSG00000135637 | protein_coding | 411.682229 | 1.07043806 | 0.07504434 | 14.2640744 | 3.6642E-46 | 7.3964E-45 |
| BCO1     | ENSG00000135697 | protein_coding | 561.108892 | 1.53980314 | 0.15067372 | 10.2194542 | 1.6225E-24 | 1.2088E-23 |
| FBXL8    | ENSG00000135722 | protein_coding | 443.559404 | 1.90264676 | 0.09836454 | 19.3428113 | 2.3434E-83 | 1.8239E-81 |
| FHOD1    | ENSG00000135723 | protein_coding | 2051.78596 | 1.25264078 | 0.07533286 | 16.6280804 | 4.3635E-62 | 1.5725E-60 |
| SLC9A5   | ENSG00000135740 | protein_coding | 111.934855 | 1.7583388  | 0.12065676 | 14.5730654 | 4.1676E-48 | 9.1411E-47 |
| AGT      | ENSG00000135744 | protein_coding | 6442.33851 | 1.06822947 | 0.17788518 | 6.00516284 | 1.9114E-09 | 5.5163E-09 |

|          |                 |                |            |            |            |            |            |            |
|----------|-----------------|----------------|------------|------------|------------|------------|------------|------------|
| GPR55    | ENSG00000135898 | protein_coding | 45.0123883 | 1.82016512 | 0.14870572 | 12.2400477 | 1.8992E-34 | 2.3223E-33 |
| CHRND    | ENSG00000135902 | protein_coding | 8.80414096 | 3.44490486 | 0.29018945 | 11.8712271 | 1.67E-32   | 1.8631E-31 |
| DOCK10   | ENSG00000135905 | protein_coding | 2017.71255 | 1.41043743 | 0.09823059 | 14.3584332 | 9.4336E-47 | 1.9532E-45 |
| SERPINE2 | ENSG00000135919 | protein_coding | 8335.76247 | 1.2951721  | 0.16099467 | 8.04481362 | 8.6377E-16 | 3.9034E-15 |
| GPR45    | ENSG00000135973 | protein_coding | 6.78436036 | 1.48584959 | 0.22301093 | 6.66267602 | 2.6889E-11 | 8.9384E-11 |
| ANKRD36  | ENSG00000135976 | protein_coding | 245.438808 | 1.71583461 | 0.1474565  | 11.6362091 | 2.6974E-31 | 2.8485E-30 |
| ALDH1L2  | ENSG00000136010 | protein_coding | 397.192878 | 1.30890168 | 0.15487894 | 8.45112782 | 2.885E-17  | 1.4333E-16 |
| STAB2    | ENSG00000136011 | protein_coding | 59.3668501 | 1.35762242 | 0.19183739 | 7.07694381 | 1.4737E-12 | 5.3641E-12 |
| PLXNC1   | ENSG00000136040 | protein_coding | 1817.42123 | 1.48842559 | 0.11672951 | 12.7510647 | 3.0752E-37 | 4.2952E-36 |
| SLC41A2  | ENSG00000136052 | protein_coding | 2288.16254 | 1.21515821 | 0.08259998 | 14.7113615 | 5.45E-49   | 1.2374E-47 |
| PCDH8    | ENSG00000136099 | protein_coding | 1.30738941 | 1.54004812 | 0.47147743 | 3.26643021 | 0.00108913 | 0.00183177 |
| CNMD     | ENSG00000136110 | protein_coding | 8.74622243 | 1.96426021 | 0.33244662 | 5.90849801 | 3.4524E-09 | 9.747E-09  |
| LCP1     | ENSG00000136167 | protein_coding | 8883.88317 | 1.80971481 | 0.12277141 | 14.7405228 | 3.5403E-49 | 8.1146E-48 |
| SPDYE1   | ENSG00000136206 | protein_coding | 18.8795545 | 1.31254262 | 0.15562274 | 8.43413138 | 3.3367E-17 | 1.6504E-16 |
| IGF2BP3  | ENSG00000136231 | protein_coding | 147.180304 | 3.72548635 | 0.29205043 | 12.7563118 | 2.8749E-37 | 4.0217E-36 |
| GPNMB    | ENSG00000136235 | protein_coding | 18301.8912 | 1.75645568 | 0.19254866 | 9.12213917 | 7.3656E-20 | 4.2713E-19 |
| AOAH     | ENSG00000136250 | protein_coding | 1223.42104 | 2.16556417 | 0.12788385 | 16.9338369 | 2.5332E-64 | 9.8996E-63 |
| CCM2     | ENSG00000136280 | protein_coding | 2938.26172 | 1.11798077 | 0.07092754 | 15.7622943 | 5.6543E-56 | 1.6605E-54 |
| MYO1G    | ENSG00000136286 | protein_coding | 983.624406 | 2.63247143 | 0.13614444 | 19.3358714 | 2.681E-83  | 2.0795E-81 |
| TTYH3    | ENSG00000136295 | protein_coding | 14860.7719 | 1.91684825 | 0.11176429 | 17.1508109 | 6.1981E-66 | 2.5667E-64 |
| NKX2-8   | ENSG00000136327 | protein_coding | 2.25486601 | 2.28362223 | 0.57392047 | 3.97898723 | 6.9209E-05 | 0.00013235 |
| NKX2-1   | ENSG00000136352 | protein_coding | 0.87577968 | 1.48173995 | 0.56557991 | 2.6198596  | 0.0087966  | 0.01326943 |
| ADAMTS7  | ENSG00000136378 | protein_coding | 749.398203 | 2.43106    | 0.11397218 | 21.3302937 | 5.943E-101 | 9.267E-99  |
| TM6SF1   | ENSG00000136404 | protein_coding | 295.573597 | 1.00085551 | 0.11433753 | 8.75351719 | 2.068E-18  | 1.1009E-17 |
| LIMD2    | ENSG00000136490 | protein_coding | 1267.07353 | 1.99471333 | 0.12430253 | 16.0472462 | 5.9757E-58 | 1.8931E-56 |

|          |                 |                |            |            |            |            |            |            |
|----------|-----------------|----------------|------------|------------|------------|------------|------------|------------|
| BRIP1    | ENSG00000136492 | protein_coding | 180.094363 | 1.80359247 | 0.12211527 | 14.7695904 | 2.3011E-49 | 5.3087E-48 |
| RTP4     | ENSG00000136514 | protein_coding | 917.478673 | 1.73960485 | 0.11565018 | 15.0419557 | 3.8986E-51 | 9.6447E-50 |
| TBR1     | ENSG00000136535 | protein_coding | 2.00456201 | 1.54369784 | 0.30043987 | 5.13812584 | 2.7749E-07 | 6.6823E-07 |
| ERMN     | ENSG00000136541 | protein_coding | 34.0413582 | 2.04666257 | 0.17634645 | 11.605919  | 3.8453E-31 | 4.019E-30  |
| GALNT5   | ENSG00000136542 | protein_coding | 267.254126 | 1.78099017 | 0.29211849 | 6.09680737 | 1.0821E-09 | 3.1869E-09 |
| GATA4    | ENSG00000136574 | protein_coding | 7.80242506 | 3.35268601 | 0.43699114 | 7.67220598 | 1.6906E-14 | 7.0123E-14 |
| HLX      | ENSG00000136630 | protein_coding | 1292.62482 | 2.53276931 | 0.12393255 | 20.4366753 | 7.8937E-93 | 9.0238E-91 |
| IL10     | ENSG00000136634 | protein_coding | 52.9204937 | 1.31060734 | 0.16141458 | 8.11951047 | 4.6807E-16 | 2.1513E-15 |
| IL36B    | ENSG00000136696 | protein_coding | 1.12571642 | 1.80808678 | 0.50830473 | 3.55709219 | 0.00037498 | 0.00066313 |
| GYPC     | ENSG00000136732 | protein_coding | 3543.94351 | 1.02811683 | 0.08352756 | 12.3087135 | 8.1309E-35 | 1.014E-33  |
| GAD2     | ENSG00000136750 | protein_coding | 3.57271628 | 2.83187724 | 0.32526367 | 8.7064051  | 3.1366E-18 | 1.6535E-17 |
| OR1J1    | ENSG00000136834 | protein_coding | 1.08096147 | 1.32325188 | 0.39910379 | 3.31555827 | 0.0009146  | 0.00154984 |
| ANGPTL2  | ENSG00000136859 | protein_coding | 5374.71035 | 1.41697825 | 0.12977808 | 10.9184714 | 9.4066E-28 | 8.3405E-27 |
| BAAT     | ENSG00000136881 | protein_coding | 108.971406 | 3.20267291 | 0.26718614 | 11.9866732 | 4.1733E-33 | 4.8031E-32 |
| WDR38    | ENSG00000136918 | protein_coding | 11.296242  | 1.09185789 | 0.17987692 | 6.07002775 | 1.2789E-09 | 3.7408E-09 |
| GABBR2   | ENSG00000136928 | protein_coding | 33.4147979 | 1.82874188 | 0.22774263 | 8.02986192 | 9.7582E-16 | 4.3959E-15 |
| HEMGN    | ENSG00000136929 | protein_coding | 9.52801195 | 1.39879233 | 0.26784862 | 5.2223241  | 1.7669E-07 | 4.3272E-07 |
| NR5A1    | ENSG00000136931 | protein_coding | 2.7468242  | 2.32953607 | 0.39208501 | 5.94140564 | 2.8259E-09 | 8.0391E-09 |
| RPL35    | ENSG00000136942 | protein_coding | 21329.6137 | 1.12381197 | 0.10829336 | 10.3774784 | 3.1396E-25 | 2.4356E-24 |
| ENPP2    | ENSG00000136960 | protein_coding | 24733.157  | 1.55731791 | 0.16835223 | 9.25035498 | 2.2375E-20 | 1.3319E-19 |
| MYC      | ENSG00000136997 | protein_coding | 5620.03674 | 1.50994941 | 0.12082136 | 12.4973712 | 7.7161E-36 | 1.0095E-34 |
| SIT1     | ENSG00000137078 | protein_coding | 242.935025 | 2.69529991 | 0.17166232 | 15.7011737 | 1.4847E-55 | 4.3076E-54 |
| DMRT1    | ENSG00000137090 | protein_coding | 2.34502474 | 3.14181579 | 0.41705987 | 7.5332489  | 4.9493E-14 | 1.9925E-13 |
| CD72     | ENSG00000137101 | protein_coding | 419.476057 | 2.71063029 | 0.13851518 | 19.5691929 | 2.8313E-85 | 2.3815E-83 |
| ARHGEF39 | ENSG00000137135 | protein_coding | 335.657211 | 2.70878238 | 0.09921591 | 27.3018956 | 4.027E-164 | 4.013E-161 |

|          |                 |                |            |            |            |            |            |            |
|----------|-----------------|----------------|------------|------------|------------|------------|------------|------------|
| CAPN11   | ENSG00000137225 | protein_coding | 120.120308 | 3.33088847 | 0.17963328 | 18.5427141 | 9.3388E-77 | 5.8644E-75 |
| KIAA0319 | ENSG00000137261 | protein_coding | 138.624666 | 2.84451623 | 0.19316671 | 14.7257065 | 4.4084E-49 | 1.0054E-47 |
| IRF4     | ENSG00000137265 | protein_coding | 236.55286  | 1.97107133 | 0.18972198 | 10.3892617 | 2.7749E-25 | 2.1601E-24 |
| FOXF2    | ENSG00000137273 | protein_coding | 43.3702048 | 1.68580654 | 0.17577616 | 9.59064404 | 8.7537E-22 | 5.6336E-21 |
| TCF19    | ENSG00000137310 | protein_coding | 1570.74699 | 1.31068827 | 0.11626465 | 11.2733175 | 1.7774E-29 | 1.7233E-28 |
| NRM      | ENSG00000137404 | protein_coding | 1128.51077 | 1.07979932 | 0.08825293 | 12.2352801 | 2.0141E-34 | 2.4614E-33 |
| FGFBP2   | ENSG00000137441 | protein_coding | 137.219991 | 1.86731128 | 0.1505575  | 12.4026452 | 2.5284E-35 | 3.2384E-34 |
| TLR2     | ENSG00000137462 | protein_coding | 1631.28527 | 1.59035126 | 0.11120392 | 14.3012164 | 2.1502E-46 | 4.3885E-45 |
| MGARP    | ENSG00000137463 | protein_coding | 419.909839 | 2.96481732 | 0.25223839 | 11.7540291 | 6.733E-32  | 7.307E-31  |
| SLCO2B1  | ENSG00000137491 | protein_coding | 6289.82223 | 1.55669647 | 0.12635607 | 12.3199187 | 7.0766E-35 | 8.8488E-34 |
| IL18BP   | ENSG00000137496 | protein_coding | 1922.56595 | 1.51185704 | 0.09469223 | 15.9660095 | 2.2045E-57 | 6.8373E-56 |
| SLCO5A1  | ENSG00000137571 | protein_coding | 39.7565463 | 1.21442528 | 0.17680188 | 6.86884814 | 6.4722E-12 | 2.2484E-11 |
| SULF1    | ENSG00000137573 | protein_coding | 6736.31397 | 1.08087017 | 0.14484548 | 7.46222913 | 8.5071E-14 | 3.3697E-13 |
| BTG4     | ENSG00000137707 | protein_coding | 1.24501021 | 1.71988978 | 0.37719755 | 4.55965257 | 5.1238E-06 | 1.0966E-05 |
| MMP13    | ENSG00000137745 | protein_coding | 27.2684483 | 4.56669013 | 0.45845235 | 9.96110095 | 2.2555E-23 | 1.5759E-22 |
| CASP1    | ENSG00000137752 | protein_coding | 1640.67611 | 1.72961424 | 0.08661989 | 19.9678647 | 1.0484E-88 | 1.0033E-86 |
| CASP5    | ENSG00000137757 | protein_coding | 24.4624706 | 2.9480568  | 0.17562884 | 16.7857218 | 3.1043E-63 | 1.1693E-61 |
| SQOR     | ENSG00000137767 | protein_coding | 3237.31327 | 1.2639576  | 0.06952893 | 18.1788733 | 7.5877E-74 | 4.2315E-72 |
| NUSAP1   | ENSG00000137804 | protein_coding | 1078.01719 | 2.12681865 | 0.09986309 | 21.2973449 | 1.201E-100 | 1.8297E-98 |
| ITPKA    | ENSG00000137825 | protein_coding | 140.105632 | 3.72221698 | 0.24039015 | 15.4840663 | 4.4447E-54 | 1.2245E-52 |
| PLCB2    | ENSG00000137841 | protein_coding | 1360.02689 | 2.11780065 | 0.12125629 | 17.4654914 | 2.6243E-68 | 1.1852E-66 |
| SPTBN5   | ENSG00000137877 | protein_coding | 295.233563 | 1.24849648 | 0.17278058 | 7.22590763 | 4.9777E-13 | 1.8676E-12 |
| BRDT     | ENSG00000137948 | protein_coding | 2.31366808 | 2.29591001 | 0.31939115 | 7.18839585 | 6.5557E-13 | 2.4423E-12 |
| IFI44L   | ENSG00000137959 | protein_coding | 2973.64488 | 1.41514    | 0.13506611 | 10.4773875 | 1.0973E-25 | 8.7422E-25 |
| IFI44    | ENSG00000137965 | protein_coding | 1715.0024  | 1.55328719 | 0.10391168 | 14.9481478 | 1.6014E-50 | 3.8821E-49 |



|          |                 |                |            |            |            |            |            |            |
|----------|-----------------|----------------|------------|------------|------------|------------|------------|------------|
| DNASE2B  | ENSG00000137976 | protein_coding | 22.050949  | 2.93803527 | 0.22607489 | 12.9958493 | 1.2917E-38 | 1.9008E-37 |
| CGREF1   | ENSG00000138028 | protein_coding | 1630.94789 | 3.02821183 | 0.16411473 | 18.4517974 | 5.0439E-76 | 3.0666E-74 |
| LHCGR    | ENSG00000138039 | protein_coding | 22.0438659 | 1.47164535 | 0.44304531 | 3.32165877 | 0.00089484 | 0.00151832 |
| TRIM54   | ENSG00000138100 | protein_coding | 318.76427  | 1.96282352 | 0.29253003 | 6.70981901 | 1.9487E-11 | 6.5389E-11 |
| CYP2C9   | ENSG00000138109 | protein_coding | 93.6158741 | 1.20934356 | 0.27181249 | 4.44918317 | 8.6197E-06 | 1.8045E-05 |
| CYP2C8   | ENSG00000138115 | protein_coding | 212.435165 | 1.84463043 | 0.21479927 | 8.58769406 | 8.8732E-18 | 4.5417E-17 |
| STAMBPL1 | ENSG00000138134 | protein_coding | 832.935627 | 2.46057771 | 0.09875182 | 24.9167834 | 4.895E-137 | 2.337E-134 |
| LBX1     | ENSG00000138136 | protein_coding | 0.62773299 | 1.05146197 | 0.48141673 | 2.18409935 | 0.02895495 | 0.04054754 |
| BTBD16   | ENSG00000138152 | protein_coding | 193.528243 | 3.56192248 | 0.17854412 | 19.9498165 | 1.5044E-88 | 1.4249E-86 |
| CUZD1    | ENSG00000138161 | protein_coding | 78.6870282 | 1.32892594 | 0.12825089 | 10.361924  | 3.6945E-25 | 2.8507E-24 |
| CEP55    | ENSG00000138180 | protein_coding | 298.825324 | 2.60235202 | 0.14639432 | 17.776318  | 1.0783E-70 | 5.3382E-69 |
| ZNF365   | ENSG00000138311 | protein_coding | 166.094901 | 1.38527864 | 0.22891823 | 6.0514125  | 1.4358E-09 | 4.1856E-09 |
| ADAMTS14 | ENSG00000138316 | protein_coding | 188.035124 | 3.38957001 | 0.20592392 | 16.4603028 | 7.0746E-61 | 2.4587E-59 |
| DNA2     | ENSG00000138346 | protein_coding | 212.860872 | 1.46239588 | 0.12307108 | 11.8825303 | 1.4588E-32 | 1.6319E-31 |
| MYPN     | ENSG00000138347 | protein_coding | 7.82774028 | 1.83904904 | 0.24778766 | 7.42187499 | 1.1547E-13 | 4.5371E-13 |
| STAT4    | ENSG00000138378 | protein_coding | 322.629002 | 1.87250095 | 0.10336314 | 18.1157509 | 2.3938E-73 | 1.3033E-71 |
| MSTN     | ENSG00000138379 | protein_coding | 45.4239682 | 1.37518542 | 0.1760237  | 7.81250145 | 5.6064E-15 | 2.4048E-14 |
| HECW2    | ENSG00000138411 | protein_coding | 2611.10851 | 1.41653073 | 0.13325318 | 10.6303709 | 2.1525E-26 | 1.7792E-25 |
| CHRNA1   | ENSG00000138435 | protein_coding | 57.2323204 | 5.32839047 | 0.29086518 | 18.3191075 | 5.826E-75  | 3.3764E-73 |
| PCDH10   | ENSG00000138650 | protein_coding | 1444.50422 | 1.63372988 | 0.23719441 | 6.88772504 | 5.6692E-12 | 1.9766E-11 |
| ZGRF1    | ENSG00000138658 | protein_coding | 189.528716 | 1.26802092 | 0.09748779 | 13.0069711 | 1.1168E-38 | 1.6472E-37 |
| IL21     | ENSG00000138684 | protein_coding | 0.72545789 | 1.83777897 | 0.43093069 | 4.26467417 | 2.0019E-05 | 4.0476E-05 |
| CXCL9    | ENSG00000138755 | protein_coding | 4529.71124 | 3.57911147 | 0.19388919 | 18.4595718 | 4.3679E-76 | 2.6662E-74 |
| CENPE    | ENSG00000138778 | protein_coding | 215.78596  | 1.61427471 | 0.13736675 | 11.7515684 | 6.932E-32  | 7.5159E-31 |
| LEF1     | ENSG00000138795 | protein_coding | 890.427628 | 1.15790336 | 0.18105926 | 6.39516238 | 1.6038E-10 | 5.0296E-10 |

|          |                 |                |            |            |            |            |            |            |
|----------|-----------------|----------------|------------|------------|------------|------------|------------|------------|
| C4orf17  | ENSG00000138813 | protein_coding | 0.51434057 | 1.08148362 | 0.44709812 | 2.41889547 | 0.01556771 | 0.02267034 |
| MAPK8IP3 | ENSG00000138834 | protein_coding | 3836.82871 | 2.08497001 | 0.1322019  | 15.7711044 | 4.9182E-56 | 1.4462E-54 |
| TTLL8    | ENSG00000138892 | protein_coding | 0.89951669 | 1.45339456 | 0.44506171 | 3.2656023  | 0.00109232 | 0.00183652 |
| SHISAL1  | ENSG00000138944 | protein_coding | 184.574634 | 1.42985676 | 0.24308181 | 5.88220378 | 4.0484E-09 | 1.1362E-08 |
| PARVG    | ENSG00000138964 | protein_coding | 1124.26845 | 2.86158303 | 0.11923811 | 23.9988969 | 2.856E-127 | 9.696E-125 |
| SLCO1C1  | ENSG00000139155 | protein_coding | 101.266953 | 2.49724458 | 0.13744965 | 18.1684323 | 9.1783E-74 | 5.0999E-72 |
| CD27     | ENSG00000139193 | protein_coding | 532.838879 | 3.29343851 | 0.19372696 | 17.0004142 | 8.1542E-65 | 3.2532E-63 |
| INHBE    | ENSG00000139269 | protein_coding | 182.696089 | 3.33641699 | 0.24810063 | 13.4478379 | 3.1701E-41 | 5.1992E-40 |
| GLIPR1   | ENSG00000139278 | protein_coding | 1803.43047 | 1.50465152 | 0.12023838 | 12.5139039 | 6.2667E-36 | 8.2407E-35 |
| KERA     | ENSG00000139330 | protein_coding | 3.45717478 | 3.42694007 | 0.42878846 | 7.9921463  | 1.3261E-15 | 5.9336E-15 |
| ASCL1    | ENSG00000139352 | protein_coding | 4.46438036 | 2.68699905 | 0.40547269 | 6.6268312  | 3.4297E-11 | 1.1319E-10 |
| GAS2L3   | ENSG00000139354 | protein_coding | 2287.10768 | 3.09084868 | 0.13324341 | 23.1970096 | 4.881E-119 | 1.293E-116 |
| SLC15A4  | ENSG00000139370 | protein_coding | 5116.77848 | 1.8403783  | 0.07495462 | 24.5532347 | 3.994E-133 | 1.68E-130  |
| GIT2     | ENSG00000139436 | protein_coding | 3626.52033 | 1.28962656 | 0.078699   | 16.3868229 | 2.3754E-60 | 8.1566E-59 |
| RDH16    | ENSG00000139547 | protein_coding | 23.6897904 | 1.00930585 | 0.13914807 | 7.2534664  | 4.0624E-13 | 1.5325E-12 |
| GPR84    | ENSG00000139572 | protein_coding | 68.2100293 | 2.10775379 | 0.17054843 | 12.3586822 | 4.3727E-35 | 5.5128E-34 |
| N4BP2L1  | ENSG00000139597 | protein_coding | 1318.43096 | 1.33558178 | 0.06682081 | 19.9875133 | 7.0734E-89 | 6.7977E-87 |
| CELA1    | ENSG00000139610 | protein_coding | 2.66389927 | 2.23833119 | 0.28419894 | 7.87593089 | 3.3822E-15 | 1.4707E-14 |
| BRCA2    | ENSG00000139618 | protein_coding | 275.350681 | 1.70890695 | 0.10286144 | 16.6136791 | 5.5483E-62 | 1.9917E-60 |
| MAP3K12  | ENSG00000139625 | protein_coding | 953.15544  | 1.33136715 | 0.09241236 | 14.4068087 | 4.6888E-47 | 9.8146E-46 |
| CSAD     | ENSG00000139631 | protein_coding | 1097.29005 | 1.53490456 | 0.13576025 | 11.3059937 | 1.2256E-29 | 1.1959E-28 |
| LMBR1L   | ENSG00000139636 | protein_coding | 1772.73598 | 1.38474847 | 0.07915838 | 17.4933904 | 1.6089E-68 | 7.3243E-67 |
| LPAR6    | ENSG00000139679 | protein_coding | 2889.39607 | 1.19736807 | 0.09751385 | 12.2789537 | 1.1751E-34 | 1.4559E-33 |
| RNF113B  | ENSG00000139797 | protein_coding | 6.10183694 | 2.3447123  | 0.31903407 | 7.3494104  | 1.9908E-13 | 7.6865E-13 |
| ZIC5     | ENSG00000139800 | protein_coding | 8.45994634 | 3.66207302 | 0.46039459 | 7.95420523 | 1.8029E-15 | 7.995E-15  |

|          |                 |                |            |            |            |            |            |            |
|----------|-----------------|----------------|------------|------------|------------|------------|------------|------------|
| CDH24    | ENSG00000139880 | protein_coding | 440.975463 | 1.09117147 | 0.08996052 | 12.1294487 | 7.3744E-34 | 8.8034E-33 |
| CBLN3    | ENSG00000139899 | protein_coding | 486.169873 | 1.63143909 | 0.10914681 | 14.9471995 | 1.6244E-50 | 3.9336E-49 |
| GPR65    | ENSG00000140030 | protein_coding | 556.92923  | 1.89607666 | 0.12150595 | 15.6048056 | 6.7515E-55 | 1.914E-53  |
| SLC24A4  | ENSG00000140090 | protein_coding | 87.1087444 | 1.72545505 | 0.10171525 | 16.9635827 | 1.5274E-64 | 6.0256E-63 |
| HDC      | ENSG00000140287 | protein_coding | 69.8545191 | 1.80528256 | 0.17477043 | 10.3294506 | 5.1857E-25 | 3.9652E-24 |
| DISP2    | ENSG00000140323 | protein_coding | 94.2733279 | 1.28024508 | 0.16315343 | 7.84687819 | 4.2652E-15 | 1.8425E-14 |
| PSTPIP1  | ENSG00000140368 | protein_coding | 430.863929 | 2.77526778 | 0.14768702 | 18.7915486 | 8.8557E-79 | 5.935E-77  |
| BCL2A1   | ENSG00000140379 | protein_coding | 248.042817 | 2.56240574 | 0.16494632 | 15.5347858 | 2.0175E-54 | 5.6152E-53 |
| PIF1     | ENSG00000140451 | protein_coding | 78.1067959 | 2.25423914 | 0.15641955 | 14.4114927 | 4.3814E-47 | 9.1879E-46 |
| PML      | ENSG00000140464 | protein_coding | 6508.22058 | 1.20792182 | 0.05663336 | 21.3288055 | 6.135E-101 | 9.534E-99  |
| PCSK6    | ENSG00000140479 | protein_coding | 5272.15305 | 2.96411077 | 0.1743214  | 17.0037118 | 7.7081E-65 | 3.0779E-63 |
| CELF6    | ENSG00000140488 | protein_coding | 3.73595065 | 1.57318034 | 0.23989147 | 6.5578836  | 5.4577E-11 | 1.7726E-10 |
| LMAN1L   | ENSG00000140506 | protein_coding | 0.96594369 | 2.39118529 | 0.47750019 | 5.00771592 | 5.508E-07  | 1.2914E-06 |
| HAPLN3   | ENSG00000140511 | protein_coding | 578.784323 | 2.38422086 | 0.13395376 | 17.7988348 | 7.2155E-71 | 3.5953E-69 |
| RLBP1    | ENSG00000140522 | protein_coding | 1.79996161 | 2.68173117 | 0.38861249 | 6.90078478 | 5.1716E-12 | 1.8069E-11 |
| FANCI    | ENSG00000140525 | protein_coding | 744.95721  | 1.2791867  | 0.0820495  | 15.5904272 | 8.4566E-55 | 2.3915E-53 |
| TICRR    | ENSG00000140534 | protein_coding | 108.227728 | 2.2869168  | 0.14022093 | 16.309383  | 8.4643E-60 | 2.8551E-58 |
| MCTP2    | ENSG00000140563 | protein_coding | 1460.34311 | 1.29634402 | 0.10352572 | 12.5219509 | 5.6626E-36 | 7.457E-35  |
| SEPTIN12 | ENSG00000140623 | protein_coding | 2.90199665 | 2.11089983 | 0.36926131 | 5.71654758 | 1.0871E-08 | 2.9421E-08 |
| ITGAX    | ENSG00000140678 | protein_coding | 1901.16928 | 3.27288584 | 0.13591255 | 24.0808211 | 3.971E-128 | 1.4E-125   |
| IGSF6    | ENSG00000140749 | protein_coding | 1153.49805 | 2.67652123 | 0.12149014 | 22.03077   | 1.461E-107 | 2.862E-105 |
| ABCC12   | ENSG00000140798 | protein_coding | 1.00778697 | 1.74826738 | 0.42772565 | 4.08735685 | 4.3632E-05 | 8.5362E-05 |
| CLEC18B  | ENSG00000140839 | protein_coding | 1366.49225 | 1.65710973 | 0.19537698 | 8.48160173 | 2.2211E-17 | 1.1116E-16 |
| NLRC5    | ENSG00000140853 | protein_coding | 3114.04847 | 2.23969835 | 0.10256424 | 21.8370299 | 1.033E-105 | 1.916E-103 |
| ADAMTS18 | ENSG00000140873 | protein_coding | 135.571497 | 1.5010138  | 0.16581126 | 9.05254435 | 1.3968E-19 | 7.9667E-19 |

|          |                 |                |            |            |            |            |            |            |
|----------|-----------------|----------------|------------|------------|------------|------------|------------|------------|
| CMTM3    | ENSG00000140931 | protein_coding | 2573.59054 | 1.50833014 | 0.10276784 | 14.6770631 | 9.0423E-49 | 2.0389E-47 |
| CMTM2    | ENSG00000140932 | protein_coding | 21.1233879 | 1.02034676 | 0.13843885 | 7.37037851 | 1.7014E-13 | 6.607E-13  |
| NOL3     | ENSG00000140939 | protein_coding | 6002.5955  | 3.40890342 | 0.10825864 | 31.488512  | 1.248E-217 | 4.4E-214   |
| CDH13    | ENSG00000140945 | protein_coding | 5449.83908 | 1.57983193 | 0.12284331 | 12.8605451 | 7.5046E-38 | 1.0734E-36 |
| IRF8     | ENSG00000140968 | protein_coding | 1557.99262 | 1.04636275 | 0.12031452 | 8.69689508 | 3.4109E-18 | 1.7929E-17 |
| RPS2     | ENSG00000140988 | protein_coding | 41872.418  | 1.46643248 | 0.09165619 | 15.9992743 | 1.2927E-57 | 4.0395E-56 |
| KSR1     | ENSG00000141068 | protein_coding | 6270.51642 | 1.89848634 | 0.11200032 | 16.9507225 | 1.901E-64  | 7.4867E-63 |
| CTRL     | ENSG00000141086 | protein_coding | 4.21424635 | 1.4893403  | 0.20917564 | 7.12004647 | 1.0789E-12 | 3.9611E-12 |
| DPEP3    | ENSG00000141096 | protein_coding | 11.1222651 | 2.27418381 | 0.20017701 | 11.3608639 | 6.5494E-30 | 6.4635E-29 |
| SPACA3   | ENSG00000141316 | protein_coding | 2.4846898  | 1.71988233 | 0.37113528 | 4.63411168 | 3.5847E-06 | 7.7862E-06 |
| C17orf64 | ENSG00000141371 | protein_coding | 8.95170746 | 1.32571202 | 0.19456577 | 6.81369596 | 9.5123E-12 | 3.2617E-11 |
| PRELID3A | ENSG00000141391 | protein_coding | 103.57107  | 1.60742193 | 0.11163518 | 14.398883  | 5.2587E-47 | 1.0992E-45 |
| MEP1B    | ENSG00000141434 | protein_coding | 5.36364745 | 1.42037848 | 0.20837691 | 6.8163908  | 9.3356E-12 | 3.2042E-11 |
| SLC25A52 | ENSG00000141437 | protein_coding | 4.73196031 | 1.17086236 | 0.22681139 | 5.1622733  | 2.4397E-07 | 5.9002E-07 |
| ARRB2    | ENSG00000141480 | protein_coding | 3361.50496 | 1.49491576 | 0.06893993 | 21.6843243 | 2.885E-104 | 5.145E-102 |
| ZMYND15  | ENSG00000141497 | protein_coding | 324.876138 | 1.71882617 | 0.0973834  | 17.6500949 | 1.0159E-69 | 4.8458E-68 |
| ASGR1    | ENSG00000141505 | protein_coding | 91.3187949 | 1.60688933 | 0.13879964 | 11.5770425 | 5.3873E-31 | 5.5923E-30 |
| PIK3R5   | ENSG00000141506 | protein_coding | 988.428966 | 2.78873938 | 0.11619496 | 24.0005198 | 2.746E-127 | 9.395E-125 |
| SLC16A3  | ENSG00000141526 | protein_coding | 14898.7489 | 3.03352625 | 0.11094594 | 27.3423812 | 1.33E-164  | 1.418E-161 |
| CARD14   | ENSG00000141527 | protein_coding | 185.272373 | 2.63455488 | 0.20627386 | 12.7721219 | 2.3467E-37 | 3.2928E-36 |
| TTYH2    | ENSG00000141540 | protein_coding | 587.501303 | 1.09333384 | 0.10106892 | 10.8177058 | 2.8379E-27 | 2.4588E-26 |
| RNF165   | ENSG00000141622 | protein_coding | 402.133152 | 1.38631189 | 0.15028361 | 9.22463787 | 2.8452E-20 | 1.6818E-19 |
| ARL5C    | ENSG00000141748 | protein_coding | 2.45006874 | 1.14129522 | 0.27266356 | 4.18572692 | 2.8425E-05 | 5.665E-05  |
| FKBP10   | ENSG00000141756 | protein_coding | 11690.9102 | 2.7863393  | 0.14636849 | 19.0364694 | 8.5073E-81 | 6.103E-79  |
| CACNA1A  | ENSG00000141837 | protein_coding | 105.207599 | 1.17650729 | 0.14505882 | 8.11055332 | 5.039E-16  | 2.3106E-15 |

|          |                 |                |            |            |            |            |            |            |
|----------|-----------------|----------------|------------|------------|------------|------------|------------|------------|
| VAV1     | ENSG00000141968 | protein_coding | 794.978452 | 2.29970016 | 0.11870124 | 19.3738519 | 1.2829E-83 | 1.0105E-81 |
| CIB3     | ENSG00000141977 | protein_coding | 1.73615174 | 2.11100624 | 0.38394546 | 5.49819301 | 3.837E-08  | 9.9207E-08 |
| SH3GL1   | ENSG00000141985 | protein_coding | 5189.50278 | 1.03526696 | 0.07097653 | 14.5860462 | 3.446E-48  | 7.58E-47   |
| DPP9     | ENSG00000142002 | protein_coding | 4865.76837 | 1.4163819  | 0.07716866 | 18.354366  | 3.0462E-75 | 1.788E-73  |
| DMRTC2   | ENSG00000142025 | protein_coding | 2.48457506 | 3.16745125 | 0.53446095 | 5.92644088 | 3.0957E-09 | 8.7761E-09 |
| TMEM91   | ENSG00000142046 | protein_coding | 2536.61492 | 3.7344458  | 0.15252729 | 24.4837874 | 2.199E-132 | 9.08E-130  |
| PGGHG    | ENSG00000142102 | protein_coding | 6466.47233 | 3.56438884 | 0.19964723 | 17.8534351 | 2.7179E-71 | 1.3737E-69 |
| COL6A1   | ENSG00000142156 | protein_coding | 17272.0486 | 1.09521849 | 0.11746303 | 9.32394176 | 1.121E-20  | 6.7908E-20 |
| COL6A2   | ENSG00000142173 | protein_coding | 26003.2785 | 1.9617351  | 0.13373723 | 14.6685793 | 1.0247E-48 | 2.3048E-47 |
| TRPM2    | ENSG00000142185 | protein_coding | 833.758023 | 2.7523539  | 0.12305466 | 22.3669217 | 8.265E-111 | 1.813E-108 |
| EMP3     | ENSG00000142227 | protein_coding | 3542.90515 | 1.69749027 | 0.10271893 | 16.5255838 | 2.401E-61  | 8.4666E-60 |
| NTN5     | ENSG00000142233 | protein_coding | 26.6115561 | 1.88407575 | 0.16364032 | 11.5135176 | 1.1278E-30 | 1.1509E-29 |
| ADAMTS10 | ENSG00000142303 | protein_coding | 972.129525 | 2.15799051 | 0.13991969 | 15.4230648 | 1.1454E-53 | 3.116E-52  |
| SLC6A3   | ENSG00000142319 | protein_coding | 9391.54633 | 6.42371158 | 0.25892762 | 24.8089086 | 7.185E-136 | 3.229E-133 |
| MYO1F    | ENSG00000142347 | protein_coding | 2066.26645 | 2.49311643 | 0.11139468 | 22.3809299 | 6.037E-111 | 1.331E-108 |
| NLRP12   | ENSG00000142405 | protein_coding | 51.6676749 | 1.68323511 | 0.13243668 | 12.7097348 | 5.2211E-37 | 7.2134E-36 |
| CACNG8   | ENSG00000142408 | protein_coding | 52.3007754 | 2.19595519 | 0.16511903 | 13.2992251 | 2.3388E-40 | 3.7047E-39 |
| GPR32    | ENSG00000142511 | protein_coding | 0.76034106 | 2.12089752 | 0.530012   | 4.00160279 | 6.2915E-05 | 0.00012088 |
| SIGLEC10 | ENSG00000142512 | protein_coding | 888.203177 | 2.96229162 | 0.13803493 | 21.4604495 | 3.648E-102 | 5.951E-100 |
| ACP4     | ENSG00000142513 | protein_coding | 4.87484641 | 1.51379652 | 0.19310011 | 7.83943876 | 4.5256E-15 | 1.9529E-14 |
| IGLON5   | ENSG00000142549 | protein_coding | 356.651347 | 6.17649345 | 0.34064174 | 18.1319338 | 1.7837E-73 | 9.7809E-72 |
| RCN3     | ENSG00000142552 | protein_coding | 1409.62019 | 1.49649699 | 0.1418237  | 10.5518115 | 4.9827E-26 | 4.0413E-25 |
| SLC2A5   | ENSG00000142583 | protein_coding | 6563.3602  | 1.71198863 | 0.18820582 | 9.09636409 | 9.3406E-20 | 5.3738E-19 |
| CFAP74   | ENSG00000142609 | protein_coding | 61.7648276 | 4.00964758 | 0.15842111 | 25.3100593 | 2.475E-141 | 1.247E-138 |
| CELA2A   | ENSG00000142615 | protein_coding | 2.46355746 | 1.98451722 | 0.29429536 | 6.74328407 | 1.5485E-11 | 5.2343E-11 |

|          |                 |                |            |            |            |            |            |            |
|----------|-----------------|----------------|------------|------------|------------|------------|------------|------------|
| PADI3    | ENSG00000142619 | protein_coding | 59.6429362 | 3.64286878 | 0.38450999 | 9.47405489 | 2.6919E-21 | 1.6878E-20 |
| PADI1    | ENSG00000142623 | protein_coding | 507.978294 | 5.72807334 | 0.28514181 | 20.0885073 | 9.3017E-90 | 9.2695E-88 |
| EFHD2    | ENSG00000142634 | protein_coding | 3999.26809 | 1.43231089 | 0.08487472 | 16.8755896 | 6.8042E-64 | 2.6145E-62 |
| SH3BGRL3 | ENSG00000142669 | protein_coding | 9120.68335 | 1.11966823 | 0.10830058 | 10.3385249 | 4.7174E-25 | 3.615E-24  |
| IL22RA1  | ENSG00000142677 | protein_coding | 393.742046 | 1.55453836 | 0.1748576  | 8.89031054 | 6.0938E-19 | 3.3519E-18 |
| SYTL1    | ENSG00000142765 | protein_coding | 324.666134 | 1.53215442 | 0.16458748 | 9.30905809 | 1.2897E-20 | 7.7904E-20 |
| RPS8     | ENSG00000142937 | protein_coding | 55477.7079 | 1.02515547 | 0.08276534 | 12.3862893 | 3.1006E-35 | 3.9416E-34 |
| KIF2C    | ENSG00000142945 | protein_coding | 284.276345 | 1.47220464 | 0.1306261  | 11.2703709 | 1.8379E-29 | 1.7801E-28 |
| BEST4    | ENSG00000142959 | protein_coding | 145.814122 | 2.67842812 | 0.21511551 | 12.4511157 | 1.379E-35  | 1.7873E-34 |
| BARHL2   | ENSG00000143032 | protein_coding | 0.95362342 | 2.05130311 | 0.46754577 | 4.38738462 | 1.1472E-05 | 2.3741E-05 |
| FNDC7    | ENSG00000143107 | protein_coding | 1.85057184 | 1.68769022 | 0.29870914 | 5.64994497 | 1.605E-08  | 4.2883E-08 |
| C1orf162 | ENSG00000143110 | protein_coding | 1722.33736 | 2.33528447 | 0.11548701 | 20.2211879 | 6.373E-91  | 6.6096E-89 |
| CD53     | ENSG00000143119 | protein_coding | 3588.76136 | 1.79964693 | 0.10965233 | 16.4123003 | 1.5617E-60 | 5.391E-59  |
| ITGA10   | ENSG00000143127 | protein_coding | 379.803564 | 1.15054322 | 0.15370316 | 7.48548844 | 7.1282E-14 | 2.8421E-13 |
| GPA33    | ENSG00000143167 | protein_coding | 18.4401798 | 1.69402582 | 0.16631491 | 10.1856522 | 2.2981E-24 | 1.6997E-23 |
| TBX19    | ENSG00000143178 | protein_coding | 284.416988 | 1.5680599  | 0.09855748 | 15.9101056 | 5.3922E-57 | 1.637E-55  |
| XCL1     | ENSG00000143184 | protein_coding | 72.5634799 | 2.37001871 | 0.1734736  | 13.6621291 | 1.7091E-42 | 2.9655E-41 |
| XCL2     | ENSG00000143185 | protein_coding | 58.5634505 | 2.56433618 | 0.17018017 | 15.0683609 | 2.6152E-51 | 6.5119E-50 |
| ADCY10   | ENSG00000143199 | protein_coding | 45.4507566 | 1.87508558 | 0.16213117 | 11.5652382 | 6.1819E-31 | 6.3912E-30 |
| FCGR2A   | ENSG00000143226 | protein_coding | 3048.97413 | 1.86239122 | 0.10988072 | 16.9492085 | 1.9506E-64 | 7.6688E-63 |
| NUF2     | ENSG00000143228 | protein_coding | 131.508945 | 1.96827818 | 0.14449011 | 13.6222346 | 2.9539E-42 | 5.0639E-41 |
| RGS5     | ENSG00000143248 | protein_coding | 124571.475 | 2.58501293 | 0.14797013 | 17.4698297 | 2.4322E-68 | 1.1006E-66 |
| F13B     | ENSG00000143278 | protein_coding | 1.51778067 | 2.62305423 | 0.39719236 | 6.60398964 | 4.0024E-11 | 1.3127E-10 |
| FCRL5    | ENSG00000143297 | protein_coding | 152.089878 | 2.02339696 | 0.27055155 | 7.47878546 | 7.5013E-14 | 2.9875E-13 |
| FAM163A  | ENSG00000143340 | protein_coding | 83.8512982 | 3.21618024 | 0.15937968 | 20.1793616 | 1.4865E-90 | 1.5177E-88 |



|          |                 |                |            |            |            |            |            |            |
|----------|-----------------|----------------|------------|------------|------------|------------|------------|------------|
| HMCN1    | ENSG00000143341 | protein_coding | 2000.87558 | 1.22327491 | 0.12913438 | 9.47288337 | 2.7222E-21 | 1.7064E-20 |
| LHX9     | ENSG00000143355 | protein_coding | 22.3521548 | 2.71037875 | 0.43065397 | 6.29363463 | 3.1012E-10 | 9.5225E-10 |
| ADAMTSL4 | ENSG00000143382 | protein_coding | 1097.766   | 2.10052448 | 0.13691429 | 15.3418935 | 4.0132E-53 | 1.0708E-51 |
| HORMAD1  | ENSG00000143452 | protein_coding | 8.9574734  | 3.24067232 | 0.25943293 | 12.4913685 | 8.321E-36  | 1.0867E-34 |
| DTL      | ENSG00000143476 | protein_coding | 348.552288 | 2.12820046 | 0.12061385 | 17.6447441 | 1.1168E-69 | 5.3217E-68 |
| DUSP10   | ENSG00000143507 | protein_coding | 515.332892 | 1.38411634 | 0.10042697 | 13.7823174 | 3.2565E-43 | 5.8222E-42 |
| HHIPL2   | ENSG00000143512 | protein_coding | 8.83790701 | 2.46257304 | 0.27218419 | 9.04745086 | 1.4634E-19 | 8.3409E-19 |
| FLG2     | ENSG00000143520 | protein_coding | 7.2603154  | 1.386496   | 0.23300253 | 5.95056208 | 2.6722E-09 | 7.6171E-09 |
| CRNN     | ENSG00000143536 | protein_coding | 2.7672244  | 2.16597399 | 0.37980804 | 5.70281238 | 1.1785E-08 | 3.1821E-08 |
| S100A8   | ENSG00000143546 | protein_coding | 581.558518 | 1.51800712 | 0.16550148 | 9.17216663 | 4.6361E-20 | 2.7142E-19 |
| SLC27A3  | ENSG00000143554 | protein_coding | 2015.73079 | 1.48362956 | 0.09147919 | 16.2182196 | 3.7491E-59 | 1.2382E-57 |
| S100A7   | ENSG00000143556 | protein_coding | 3.06694805 | 1.48326676 | 0.42733738 | 3.47095017 | 0.00051862 | 0.00090319 |
| EFNA3    | ENSG00000143590 | protein_coding | 261.610339 | 2.39917197 | 0.12677258 | 18.9250072 | 7.098E-80  | 4.9375E-78 |
| AQP10    | ENSG00000143595 | protein_coding | 2.17256294 | 1.17889892 | 0.25930181 | 4.54643537 | 5.4562E-06 | 1.1649E-05 |
| RIT1     | ENSG00000143622 | protein_coding | 4454.35291 | 1.08704007 | 0.0755084  | 14.3962802 | 5.4604E-47 | 1.1404E-45 |
| DEGS1    | ENSG00000143753 | protein_coding | 8008.04745 | 1.26064683 | 0.0935423  | 13.4767568 | 2.1432E-41 | 3.5507E-40 |
| PPFIA4   | ENSG00000143847 | protein_coding | 1697.78196 | 3.14025759 | 0.17565028 | 17.8778966 | 1.7533E-71 | 8.9402E-70 |
| PTPN7    | ENSG00000143851 | protein_coding | 711.597052 | 1.73366198 | 0.14996752 | 11.5602498 | 6.5518E-31 | 6.7568E-30 |
| DQX1     | ENSG00000144045 | protein_coding | 9.10683276 | 2.93721383 | 0.2989972  | 9.8235497  | 8.9148E-23 | 6.0391E-22 |
| MALL     | ENSG00000144063 | protein_coding | 260.473687 | 2.05679478 | 0.14799371 | 13.8978522 | 6.5271E-44 | 1.2007E-42 |
| NT5DC4   | ENSG00000144130 | protein_coding | 10.101047  | 1.01837208 | 0.23776772 | 4.28305434 | 1.8435E-05 | 3.7402E-05 |
| FBLN7    | ENSG00000144152 | protein_coding | 519.438186 | 2.18967613 | 0.16460467 | 13.3026367 | 2.2345E-40 | 3.5431E-39 |
| AFF3     | ENSG00000144218 | protein_coding | 1173.22196 | 1.44622594 | 0.1362015  | 10.6182824 | 2.4503E-26 | 2.0184E-25 |
| SCN1A    | ENSG00000144285 | protein_coding | 37.7247134 | 2.09874243 | 0.23637157 | 8.87899691 | 6.7466E-19 | 3.7012E-18 |
| CDCA7    | ENSG00000144354 | protein_coding | 218.328028 | 2.00721627 | 0.15475682 | 12.9701311 | 1.8072E-38 | 2.6426E-37 |

|         |                 |                |            |            |            |            |            |            |
|---------|-----------------|----------------|------------|------------|------------|------------|------------|------------|
| DLX1    | ENSG00000144355 | protein_coding | 49.9376284 | 3.18397046 | 0.17630517 | 18.0594272 | 6.6509E-73 | 3.5659E-71 |
| CCDC150 | ENSG00000144395 | protein_coding | 390.725666 | 1.10311895 | 0.16477969 | 6.69450787 | 2.164E-11  | 7.2419E-11 |
| ABCA12  | ENSG00000144452 | protein_coding | 478.788184 | 2.86292864 | 0.1834733  | 15.6040611 | 6.8307E-55 | 1.9353E-53 |
| NYAP2   | ENSG00000144460 | protein_coding | 2.72309471 | 1.06858765 | 0.28267236 | 3.78030462 | 0.00015664 | 0.00028879 |
| ACKR3   | ENSG00000144476 | protein_coding | 5015.95313 | 2.27634575 | 0.12563744 | 18.1183717 | 2.2825E-73 | 1.2441E-71 |
| TRPM8   | ENSG00000144481 | protein_coding | 39.30365   | 1.72785777 | 0.23384845 | 7.38879278 | 1.4817E-13 | 5.7786E-13 |
| MARCHF4 | ENSG00000144583 | protein_coding | 83.6447352 | 2.77070742 | 0.16778336 | 16.5136012 | 2.9287E-61 | 1.0312E-59 |
| LRTM1   | ENSG00000144771 | protein_coding | 1.46497676 | 1.64193433 | 0.42646668 | 3.85008817 | 0.00011808 | 0.00022063 |
| COL8A1  | ENSG00000144810 | protein_coding | 6169.50108 | 1.96879902 | 0.14362328 | 13.7080773 | 9.0833E-43 | 1.5984E-41 |
| ADGRG7  | ENSG00000144820 | protein_coding | 4.47625073 | 2.05123148 | 0.34283928 | 5.9830702  | 2.1897E-09 | 6.2898E-09 |
| MYH15   | ENSG00000144821 | protein_coding | 74.7478831 | 2.38140957 | 0.15976864 | 14.9053625 | 3.0416E-50 | 7.2809E-49 |
| PLA1A   | ENSG00000144837 | protein_coding | 2756.03695 | 1.63022764 | 0.1386595  | 11.7570569 | 6.4959E-32 | 7.0564E-31 |
| NR1I2   | ENSG00000144852 | protein_coding | 28.3957393 | 1.39502663 | 0.17157142 | 8.13087985 | 4.2619E-16 | 1.9633E-15 |
| TMEM44  | ENSG00000145014 | protein_coding | 1259.59947 | 1.79993035 | 0.11189975 | 16.0852045 | 3.2398E-58 | 1.0357E-56 |
| STXBP5L | ENSG00000145087 | protein_coding | 15.3840029 | 1.40227327 | 0.38150466 | 3.67563864 | 0.00023726 | 0.00042883 |
| TM4SF19 | ENSG00000145107 | protein_coding | 20.9016065 | 2.87755217 | 0.2311888  | 12.4467631 | 1.4563E-35 | 1.8853E-34 |
| SLC10A4 | ENSG00000145248 | protein_coding | 7.11837805 | 1.04113396 | 0.18304005 | 5.68801187 | 1.2853E-08 | 3.4591E-08 |
| SLC10A6 | ENSG00000145283 | protein_coding | 68.1563486 | 2.59906026 | 0.15553951 | 16.7099687 | 1.1089E-62 | 4.0831E-61 |
| PLAC8   | ENSG00000145287 | protein_coding | 228.389433 | 1.8601948  | 0.15901854 | 11.6979747 | 1.3053E-31 | 1.399E-30  |
| CCNA2   | ENSG00000145386 | protein_coding | 349.858253 | 2.23656821 | 0.12130141 | 18.4381052 | 6.4979E-76 | 3.9245E-74 |
| MARCHF1 | ENSG00000145416 | protein_coding | 1202.75338 | 1.61320593 | 0.13376405 | 12.0600861 | 1.716E-33  | 2.0088E-32 |
| SFRP2   | ENSG00000145423 | protein_coding | 2777.41304 | 1.92627538 | 0.28827759 | 6.68201567 | 2.3568E-11 | 7.8681E-11 |
| RNF175  | ENSG00000145428 | protein_coding | 102.401772 | 2.41012102 | 0.14903081 | 16.171965  | 7.9521E-59 | 2.589E-57  |
| ROPN1L  | ENSG00000145491 | protein_coding | 64.4156074 | 1.24416424 | 0.12611346 | 9.86543584 | 5.8779E-23 | 4.0132E-22 |
| NKD2    | ENSG00000145506 | protein_coding | 516.696235 | 1.82174922 | 0.23649566 | 7.70309802 | 1.3281E-14 | 5.5461E-14 |

|          |                 |                |            |            |            |            |            |            |
|----------|-----------------|----------------|------------|------------|------------|------------|------------|------------|
| RPL37    | ENSG00000145592 | protein_coding | 34577.6068 | 1.03317312 | 0.08396668 | 12.3045609 | 8.5601E-35 | 1.0663E-33 |
| OSMR     | ENSG00000145623 | protein_coding | 10184.4707 | 1.50822798 | 0.106636   | 14.1437038 | 2.0425E-45 | 3.9896E-44 |
| PLK2     | ENSG00000145632 | protein_coding | 6225.27973 | 2.21036121 | 0.09947916 | 22.2193401 | 2.233E-109 | 4.675E-107 |
| GZMA     | ENSG00000145649 | protein_coding | 1006.51915 | 3.12148022 | 0.16013785 | 19.4924575 | 1.2722E-84 | 1.0452E-82 |
| HAPLN1   | ENSG00000145681 | protein_coding | 1002.03643 | 3.53792692 | 0.20220814 | 17.4964614 | 1.5245E-68 | 6.9577E-67 |
| LHFPL2   | ENSG00000145685 | protein_coding | 3338.29858 | 2.00550903 | 0.11573584 | 17.3283322 | 2.8755E-67 | 1.2518E-65 |
| ARHGAP26 | ENSG00000145819 | protein_coding | 3250.88741 | 1.02774195 | 0.08286737 | 12.4022519 | 2.5408E-35 | 3.2534E-34 |
| LECT2    | ENSG00000145826 | protein_coding | 19.4004825 | 1.72563872 | 0.265614   | 6.49679128 | 8.2051E-11 | 2.631E-10  |
| TIMD4    | ENSG00000145850 | protein_coding | 420.940877 | 1.78568505 | 0.1711423  | 10.4339201 | 1.7358E-25 | 1.3672E-24 |
| SPINK7   | ENSG00000145879 | protein_coding | 13.6038056 | 1.20454425 | 0.29029692 | 4.14935254 | 3.3342E-05 | 6.6019E-05 |
| GLRA1    | ENSG00000145888 | protein_coding | 1.88377166 | 2.03567627 | 0.33610313 | 6.05670128 | 1.3894E-09 | 4.054E-09  |
| TNIP1    | ENSG00000145901 | protein_coding | 23722.2159 | 1.03576138 | 0.07049716 | 14.6922416 | 7.2282E-49 | 1.6355E-47 |
| CPLX2    | ENSG00000145920 | protein_coding | 4.84539276 | 3.59832494 | 0.43096474 | 8.34946484 | 6.8573E-17 | 3.3264E-16 |
| KCNMB1   | ENSG00000145936 | protein_coding | 532.427634 | 1.16930075 | 0.12947755 | 9.03091532 | 1.7024E-19 | 9.6585E-19 |
| GFOD1    | ENSG00000145990 | protein_coding | 1067.94623 | 1.0472323  | 0.11353885 | 9.22355882 | 2.874E-20  | 1.6986E-19 |
| PSD2     | ENSG00000146005 | protein_coding | 65.9629331 | 2.40476343 | 0.18290958 | 13.1472799 | 1.7641E-39 | 2.7001E-38 |
| SLC17A4  | ENSG00000146039 | protein_coding | 2850.41354 | 3.58433967 | 0.23718105 | 15.1122514 | 1.3447E-51 | 3.3887E-50 |
| H2BC1    | ENSG00000146047 | protein_coding | 1.2931215  | 1.15607523 | 0.35408312 | 3.26498259 | 0.00109471 | 0.00184028 |
| TRIM7    | ENSG00000146054 | protein_coding | 250.218987 | 1.44810046 | 0.1744103  | 8.3028379  | 1.0165E-16 | 4.8769E-16 |
| FAM193B  | ENSG00000146067 | protein_coding | 2581.0855  | 2.09199445 | 0.12978063 | 16.1194663 | 1.8621E-58 | 5.9944E-57 |
| PLA2G7   | ENSG00000146070 | protein_coding | 495.970557 | 3.65076507 | 0.17546026 | 20.8067916 | 3.7566E-96 | 4.9343E-94 |
| RASGEF1C | ENSG00000146090 | protein_coding | 45.3131146 | 1.71139127 | 0.25564686 | 6.6943567  | 2.1662E-11 | 7.2488E-11 |
| DOK3     | ENSG00000146094 | protein_coding | 780.165793 | 2.62221051 | 0.10806228 | 24.2657329 | 4.511E-130 | 1.681E-127 |
| PPP1R18  | ENSG00000146112 | protein_coding | 4672.97523 | 1.64893823 | 0.0830477  | 19.8553146 | 9.914E-88  | 9.1442E-86 |
| MLIP     | ENSG00000146147 | protein_coding | 121.413153 | 2.14639266 | 0.16346356 | 13.1307108 | 2.1959E-39 | 3.3475E-38 |

|          |                 |                |            |            |            |            |            |            |
|----------|-----------------|----------------|------------|------------|------------|------------|------------|------------|
| FGD2     | ENSG00000146192 | protein_coding | 816.219284 | 2.4939043  | 0.12528972 | 19.9050992 | 3.6756E-88 | 3.467E-86  |
| ANO7     | ENSG00000146205 | protein_coding | 206.645579 | 1.14150468 | 0.09019786 | 12.6555628 | 1.0423E-36 | 1.4232E-35 |
| CRIP3    | ENSG00000146215 | protein_coding | 100.424073 | 1.04319288 | 0.17610898 | 5.92356437 | 3.1504E-09 | 8.9278E-09 |
| TCTE1    | ENSG00000146221 | protein_coding | 10.7450818 | 1.48705633 | 0.17787721 | 8.36001625 | 6.271E-17  | 3.0484E-16 |
| NFKBIE   | ENSG00000146232 | protein_coding | 2140.41029 | 1.20909648 | 0.09124904 | 13.250512  | 4.4814E-40 | 6.9945E-39 |
| GABRR1   | ENSG00000146276 | protein_coding | 18.1493165 | 1.69830461 | 0.19027375 | 8.92558533 | 4.4335E-19 | 2.4557E-18 |
| SCML4    | ENSG00000146285 | protein_coding | 100.235845 | 1.32781989 | 0.13673584 | 9.7108404  | 2.7109E-22 | 1.7891E-21 |
| CLVS2    | ENSG00000146352 | protein_coding | 40.1150171 | 4.07922979 | 0.29592958 | 13.7844613 | 3.1612E-43 | 5.6562E-42 |
| MTFR2    | ENSG00000146410 | protein_coding | 64.9987497 | 1.48783444 | 0.11694108 | 12.7229407 | 4.4095E-37 | 6.1105E-36 |
| VIP      | ENSG00000146469 | protein_coding | 35.8972478 | 2.08792975 | 0.19103159 | 10.9297616 | 8.3066E-28 | 7.3881E-27 |
| CREB5    | ENSG00000146592 | protein_coding | 2391.10771 | 1.47803685 | 0.11098993 | 13.3168548 | 1.8473E-40 | 2.9393E-39 |
| EGFR     | ENSG00000146648 | protein_coding | 19274.2463 | 1.45312397 | 0.11101665 | 13.0892439 | 3.7937E-39 | 5.7319E-38 |
| CDCA5    | ENSG00000146670 | protein_coding | 293.053695 | 1.57967231 | 0.12379574 | 12.7603123 | 2.731E-37  | 3.8215E-36 |
| IGFBP3   | ENSG00000146674 | protein_coding | 134297.507 | 3.48589828 | 0.14426471 | 24.1632085 | 5.424E-129 | 1.973E-126 |
| IGFBP1   | ENSG00000146678 | protein_coding | 950.999823 | 3.62141538 | 0.34065723 | 10.6306723 | 2.1456E-26 | 1.7744E-25 |
| ZAN      | ENSG00000146839 | protein_coding | 14.5555576 | 4.8635686  | 0.40660719 | 11.9613445 | 5.6637E-33 | 6.4784E-32 |
| AGBL3    | ENSG00000146856 | protein_coding | 607.622218 | 1.52820181 | 0.11055343 | 13.8231962 | 1.8468E-43 | 3.3423E-42 |
| STRA8    | ENSG00000146857 | protein_coding | 146.982548 | 3.32195728 | 0.18154973 | 18.2977818 | 8.6187E-75 | 4.9697E-73 |
| ZC3HAV1L | ENSG00000146858 | protein_coding | 434.478187 | 1.17594813 | 0.10147989 | 11.5879917 | 4.7412E-31 | 4.9369E-30 |
| TMEM140  | ENSG00000146859 | protein_coding | 6565.18436 | 1.41083997 | 0.07581894 | 18.6080156 | 2.7668E-77 | 1.7665E-75 |
| CNPY1    | ENSG00000146910 | protein_coding | 4.88966188 | 4.28193568 | 0.39314618 | 10.8914595 | 1.2659E-27 | 1.1158E-26 |
| DIPK2B   | ENSG00000147113 | protein_coding | 3785.44312 | 1.87743297 | 0.1151251  | 16.3077639 | 8.6917E-60 | 2.9275E-58 |
| GPR174   | ENSG00000147138 | protein_coding | 84.8564829 | 2.44760772 | 0.18985759 | 12.8918087 | 5.0056E-38 | 7.2112E-37 |
| LPAR4    | ENSG00000147145 | protein_coding | 22.0370786 | 1.19599111 | 0.16602273 | 7.20377918 | 5.8566E-13 | 2.1878E-12 |
| IL2RG    | ENSG00000147168 | protein_coding | 2029.67776 | 1.87422608 | 0.14439647 | 12.9797224 | 1.5946E-38 | 2.3391E-37 |

|          |                 |                |            |            |            |            |            |            |
|----------|-----------------|----------------|------------|------------|------------|------------|------------|------------|
| GCNA     | ENSG00000147174 | protein_coding | 74.8670903 | 1.53928943 | 0.13487122 | 11.4130309 | 3.5996E-30 | 3.5888E-29 |
| DIAPH2   | ENSG00000147202 | protein_coding | 2629.17752 | 1.11833773 | 0.08056282 | 13.8815615 | 8.1939E-44 | 1.5031E-42 |
| FRMPD3   | ENSG00000147234 | protein_coding | 26.1606295 | 1.46959989 | 0.19064679 | 7.70849543 | 1.2731E-14 | 5.3238E-14 |
| HTR2C    | ENSG00000147246 | protein_coding | 1.00553891 | 1.55915745 | 0.47818693 | 3.26056056 | 0.00111192 | 0.00186771 |
| ARHGAP36 | ENSG00000147256 | protein_coding | 3.84738722 | 1.48392298 | 0.41186749 | 3.60291358 | 0.00031467 | 0.00056093 |
| FATE1    | ENSG00000147378 | protein_coding | 106.486669 | 3.52082763 | 0.1536705  | 22.9115386 | 3.565E-116 | 8.647E-114 |
| RPL10    | ENSG00000147403 | protein_coding | 75208.6562 | 1.03911955 | 0.0757386  | 13.7198148 | 7.7262E-43 | 1.3628E-41 |
| CHRNA6   | ENSG00000147434 | protein_coding | 32.9549193 | 2.98564022 | 0.21842685 | 13.6688336 | 1.5587E-42 | 2.7117E-41 |
| GNRH1    | ENSG00000147437 | protein_coding | 114.901987 | 2.80886527 | 0.15625554 | 17.9760999 | 2.9986E-72 | 1.5674E-70 |
| DOK2     | ENSG00000147443 | protein_coding | 569.142039 | 1.87164881 | 0.11488038 | 16.292154  | 1.1221E-59 | 3.7682E-58 |
| SLC25A37 | ENSG00000147454 | protein_coding | 3019.22153 | 1.00038986 | 0.09883505 | 10.1218122 | 4.4215E-24 | 3.2122E-23 |
| STAR     | ENSG00000147465 | protein_coding | 10.8381601 | 1.05416131 | 0.20966567 | 5.02782032 | 4.9609E-07 | 1.168E-06  |
| RGS20    | ENSG00000147509 | protein_coding | 43.8170603 | 2.85741593 | 0.22699986 | 12.5877434 | 2.4662E-36 | 3.3076E-35 |
| DNAJC5B  | ENSG00000147570 | protein_coding | 78.8981994 | 3.74622317 | 0.18902721 | 19.8184333 | 2.0644E-87 | 1.8851E-85 |
| TRIM55   | ENSG00000147573 | protein_coding | 1246.11903 | 1.02057741 | 0.15222121 | 6.70456762 | 2.02E-11   | 6.772E-11  |
| GSDMC    | ENSG00000147697 | protein_coding | 14.1839166 | 3.35034218 | 0.30994957 | 10.8093138 | 3.1099E-27 | 2.6883E-26 |
| PLIN2    | ENSG00000147872 | protein_coding | 54329.0724 | 2.89848083 | 0.14887736 | 19.4689159 | 2.0149E-84 | 1.6435E-82 |
| IFNA5    | ENSG00000147873 | protein_coding | 1.03044378 | 1.2630114  | 0.30578409 | 4.13040264 | 3.6213E-05 | 7.1448E-05 |
| CDKN2B   | ENSG00000147883 | protein_coding | 741.949177 | 1.68519891 | 0.10671902 | 15.7909899 | 3.589E-56  | 1.0587E-54 |
| CDKN2A   | ENSG00000147889 | protein_coding | 436.34325  | 4.9269717  | 0.16701592 | 29.5000119 | 2.878E-191 | 5.736E-188 |
| IFNK     | ENSG00000147896 | protein_coding | 2.79245521 | 2.83808971 | 0.38064292 | 7.4560423  | 8.916E-14  | 3.5277E-13 |
| ACTL7B   | ENSG00000148156 | protein_coding | 0.78129323 | 1.17460291 | 0.34431713 | 3.41139838 | 0.00064631 | 0.00111385 |
| OR5C1    | ENSG00000148215 | protein_coding | 1.06023819 | 2.41244742 | 0.45064566 | 5.35331333 | 8.6358E-08 | 2.1711E-07 |
| IDI2     | ENSG00000148377 | protein_coding | 0.82333299 | 1.24231839 | 0.33732545 | 3.68284805 | 0.00023064 | 0.00041746 |
| CACNA1B  | ENSG00000148408 | protein_coding | 9.84061429 | 1.11722685 | 0.27008415 | 4.13658796 | 3.5251E-05 | 6.9619E-05 |

|          |                 |                |            |            |            |            |            |            |
|----------|-----------------|----------------|------------|------------|------------|------------|------------|------------|
| SLC39A12 | ENSG00000148482 | protein_coding | 2.64006877 | 1.83394687 | 0.29853277 | 6.14320118 | 8.0875E-10 | 2.4061E-09 |
| CDHR1    | ENSG00000148600 | protein_coding | 1558.09907 | 4.19468479 | 0.25993804 | 16.1372487 | 1.3963E-58 | 4.5044E-57 |
| HTR7     | ENSG00000148680 | protein_coding | 64.3682659 | 1.74547481 | 0.15160818 | 11.513065  | 1.1338E-30 | 1.1567E-29 |
| HABP2    | ENSG00000148702 | protein_coding | 4021.29559 | 1.71126168 | 0.31860927 | 5.37103535 | 7.8286E-08 | 1.9769E-07 |
| VAX1     | ENSG00000148704 | protein_coding | 1.45384257 | 1.01858443 | 0.4261172  | 2.3903856  | 0.01683069 | 0.02439716 |
| NPFFR1   | ENSG00000148734 | protein_coding | 41.8431877 | 2.50275068 | 0.22890101 | 10.9337685 | 7.9478E-28 | 7.0786E-27 |
| MKI67    | ENSG00000148773 | protein_coding | 1248.87435 | 2.20729522 | 0.14966362 | 14.7483752 | 3.1516E-49 | 7.2345E-48 |
| ADAM12   | ENSG00000148848 | protein_coding | 899.009674 | 1.8874407  | 0.2157391  | 8.74871855 | 2.1579E-18 | 1.1473E-17 |
| RGS10    | ENSG00000148908 | protein_coding | 1243.21727 | 1.60457023 | 0.10431447 | 15.3820485 | 2.16E-53   | 5.8212E-52 |
| ADM      | ENSG00000148926 | protein_coding | 11445.1335 | 2.69966711 | 0.11942553 | 22.6054431 | 3.831E-113 | 8.87E-111  |
| SAA4     | ENSG00000148965 | protein_coding | 15.3710037 | 3.74138945 | 0.43321652 | 8.63630382 | 5.8061E-18 | 3.01E-17   |
| SCGB1A1  | ENSG00000149021 | protein_coding | 1.29452759 | 1.62641528 | 0.34130496 | 4.7652846  | 1.8859E-06 | 4.2048E-06 |
| SYT8     | ENSG00000149043 | protein_coding | 42.9377839 | 2.60430029 | 0.3503782  | 7.43282629 | 1.063E-13  | 4.1864E-13 |
| DGKZ     | ENSG00000149091 | protein_coding | 4418.02865 | 1.27172463 | 0.06971232 | 18.2424661 | 2.375E-74  | 1.3458E-72 |
| CCDC81   | ENSG00000149201 | protein_coding | 54.3580365 | 1.34392026 | 0.13175493 | 10.2001515 | 1.9796E-24 | 1.4703E-23 |
| SERPINH1 | ENSG00000149257 | protein_coding | 13431.8539 | 1.54816332 | 0.09526696 | 16.2507894 | 2.2051E-59 | 7.3354E-58 |
| NCAM1    | ENSG00000149294 | protein_coding | 1277.81016 | 1.34158764 | 0.26143275 | 5.13167393 | 2.8718E-07 | 6.9043E-07 |
| P4HA3    | ENSG00000149380 | protein_coding | 447.380633 | 2.83785562 | 0.18655123 | 15.212205  | 2.9349E-52 | 7.6269E-51 |
| GRIK4    | ENSG00000149403 | protein_coding | 117.772079 | 1.69210033 | 0.22792521 | 7.42392789 | 1.137E-13  | 4.4688E-13 |
| TMC2     | ENSG00000149488 | protein_coding | 5.5815261  | 1.3336286  | 0.20366612 | 6.54811224 | 5.8269E-11 | 1.8873E-10 |
| ZP1      | ENSG00000149506 | protein_coding | 41.2041926 | 4.67678523 | 0.31341239 | 14.9221452 | 2.3654E-50 | 5.6921E-49 |
| MS4A3    | ENSG00000149516 | protein_coding | 2.08734308 | 1.36091438 | 0.37580182 | 3.62136187 | 0.00029306 | 0.00052423 |
| MS4A2    | ENSG00000149534 | protein_coding | 129.364421 | 1.2730065  | 0.17587954 | 7.23794528 | 4.5553E-13 | 1.714E-12  |
| JPH2     | ENSG00000149596 | protein_coding | 975.250828 | 1.65621585 | 0.15557666 | 10.6456576 | 1.8269E-26 | 1.5194E-25 |
| SPINT4   | ENSG00000149651 | protein_coding | 0.52450886 | 1.34022518 | 0.61527577 | 2.17825119 | 0.02938734 | 0.04112039 |



|          |                 |                |            |            |            |            |            |            |
|----------|-----------------|----------------|------------|------------|------------|------------|------------|------------|
| FERMT3   | ENSG00000149781 | protein_coding | 1698.82479 | 2.09719125 | 0.10942569 | 19.1654373 | 7.195E-82  | 5.3197E-80 |
| ALDOA    | ENSG00000149925 | protein_coding | 113385.469 | 1.0987817  | 0.07425194 | 14.7980198 | 1.5086E-49 | 3.4998E-48 |
| TLCD3B   | ENSG00000149926 | protein_coding | 21.3094171 | 3.67589362 | 0.25685137 | 14.3113646 | 1.8583E-46 | 3.8064E-45 |
| DOC2A    | ENSG00000149927 | protein_coding | 1757.40751 | 6.11523753 | 0.21485465 | 28.4622065 | 3.442E-178 | 4.93E-175  |
| HMGA2    | ENSG00000149948 | protein_coding | 45.2062565 | 1.66562626 | 0.31287994 | 5.32353165 | 1.0177E-07 | 2.5421E-07 |
| CLEC1A   | ENSG00000150048 | protein_coding | 519.274906 | 1.24637186 | 0.10610617 | 11.7464596 | 7.364E-32  | 7.9729E-31 |
| FCGR1A   | ENSG00000150337 | protein_coding | 477.98914  | 3.08954932 | 0.14814236 | 20.8552724 | 1.3652E-96 | 1.8299E-94 |
| CDH8     | ENSG00000150394 | protein_coding | 122.10753  | 3.46557235 | 0.18510253 | 18.7224476 | 3.2487E-78 | 2.1306E-76 |
| VEGFC    | ENSG00000150630 | protein_coding | 912.294563 | 1.12036523 | 0.10876923 | 10.3003872 | 7.0178E-25 | 5.3262E-24 |
| CCDC102B | ENSG00000150636 | protein_coding | 779.368819 | 1.43776773 | 0.10416748 | 13.8024622 | 2.4629E-43 | 4.4276E-42 |
| RGS18    | ENSG00000150681 | protein_coding | 318.503963 | 1.60184721 | 0.13130201 | 12.1997162 | 3.1191E-34 | 3.7836E-33 |
| PRSS53   | ENSG00000151006 | protein_coding | 180.31069  | 3.50846785 | 0.18260335 | 19.2136002 | 2.8481E-82 | 2.1403E-80 |
| SLC7A11  | ENSG00000151012 | protein_coding | 198.508595 | 1.77096794 | 0.15826351 | 11.1899954 | 4.5646E-29 | 4.334E-28  |
| ENKUR    | ENSG00000151023 | protein_coding | 120.973966 | 1.53292316 | 0.15222234 | 10.0702902 | 7.4757E-24 | 5.3613E-23 |
| CACNA2D4 | ENSG00000151062 | protein_coding | 403.008463 | 2.07533246 | 0.14414189 | 14.3978438 | 5.3383E-47 | 1.1154E-45 |
| ADAMTS12 | ENSG00000151388 | protein_coding | 462.734776 | 1.35306666 | 0.1651412  | 8.19339232 | 2.5396E-16 | 1.1864E-15 |
| SLC25A31 | ENSG00000151475 | protein_coding | 1.28324734 | 1.43013253 | 0.35475322 | 4.0313447  | 5.5459E-05 | 0.00010719 |
| ANO4     | ENSG00000151572 | protein_coding | 521.753157 | 3.72821888 | 0.21096402 | 17.6722969 | 6.8548E-70 | 3.2938E-68 |
| DRD3     | ENSG00000151577 | protein_coding | 0.69345663 | 1.58164144 | 0.34398783 | 4.59795756 | 4.2665E-06 | 9.2065E-06 |
| EDNRA    | ENSG00000151617 | protein_coding | 2013.44085 | 1.2306362  | 0.11817299 | 10.4138538 | 2.1436E-25 | 1.6792E-24 |
| DPYSL4   | ENSG00000151640 | protein_coding | 127.327502 | 2.29567898 | 0.26808201 | 8.56334579 | 1.0964E-17 | 5.5819E-17 |
| VENTX    | ENSG00000151650 | protein_coding | 100.935966 | 1.90987167 | 0.13800605 | 13.8390426 | 1.4817E-43 | 2.6964E-42 |
| ADAM8    | ENSG00000151651 | protein_coding | 647.136716 | 2.1267318  | 0.1508672  | 14.0967143 | 3.9787E-45 | 7.6794E-44 |
| ANKAR    | ENSG00000151687 | protein_coding | 217.348296 | 1.04077433 | 0.08887793 | 11.7101552 | 1.1307E-31 | 1.2168E-30 |
| FLI1     | ENSG00000151702 | protein_coding | 2604.20745 | 1.19818481 | 0.08283254 | 14.4651461 | 2.0118E-47 | 4.2774E-46 |

|          |                 |                |            |            |            |            |            |            |
|----------|-----------------|----------------|------------|------------|------------|------------|------------|------------|
| CENPU    | ENSG00000151725 | protein_coding | 358.466813 | 1.82963414 | 0.10465703 | 17.482191  | 1.9583E-68 | 8.8881E-67 |
| TDO2     | ENSG00000151790 | protein_coding | 151.480112 | 1.85141841 | 0.21251547 | 8.71192296 | 2.9876E-18 | 1.5764E-17 |
| SACS     | ENSG00000151835 | protein_coding | 1623.52629 | 1.29258062 | 0.09889773 | 13.069872  | 4.8948E-39 | 7.3591E-38 |
| CCL28    | ENSG00000151882 | protein_coding | 1722.03672 | 1.52407703 | 0.15446906 | 9.86655234 | 5.8128E-23 | 3.9712E-22 |
| TMEM132D | ENSG00000151952 | protein_coding | 60.6616168 | 1.17548744 | 0.25179133 | 4.66849847 | 3.0341E-06 | 6.637E-06  |
| RBM46    | ENSG00000151962 | protein_coding | 24.8509095 | 3.63869399 | 0.24128225 | 15.0806533 | 2.1711E-51 | 5.4267E-50 |
| MCHR2    | ENSG00000152034 | protein_coding | 0.7075113  | 1.30603092 | 0.4968786  | 2.62847088 | 0.00857697 | 0.01295604 |
| KCNE4    | ENSG00000152049 | protein_coding | 2034.65064 | 2.03870432 | 0.12173226 | 16.7474455 | 5.9111E-63 | 2.1923E-61 |
| CCDC74B  | ENSG00000152076 | protein_coding | 307.137493 | 1.25423487 | 0.15556229 | 8.06258948 | 7.4695E-16 | 3.3878E-15 |
| MZT2B    | ENSG00000152082 | protein_coding | 3337.01083 | 1.16170026 | 0.11771262 | 9.86895222 | 5.6754E-23 | 3.8796E-22 |
| TUBA3E   | ENSG00000152086 | protein_coding | 52.1578864 | 6.24992032 | 0.40243271 | 15.5303488 | 2.162E-54  | 6.0066E-53 |
| HSPB8    | ENSG00000152137 | protein_coding | 13153.2035 | 2.14910139 | 0.11799969 | 18.2127721 | 4.0872E-74 | 2.2933E-72 |
| POU4F1   | ENSG00000152192 | protein_coding | 17.9486605 | 3.59152503 | 0.37678929 | 9.53191914 | 1.544E-21  | 9.8046E-21 |
| CYSLTR2  | ENSG00000152207 | protein_coding | 1541.31495 | 1.5889379  | 0.2714124  | 5.85433057 | 4.7894E-09 | 1.3367E-08 |
| ARL11    | ENSG00000152213 | protein_coding | 173.293203 | 1.93110865 | 0.10213855 | 18.9067555 | 1.0034E-79 | 6.9379E-78 |
| PSTPIP2  | ENSG00000152229 | protein_coding | 530.564059 | 1.09820716 | 0.098777   | 11.1180448 | 1.0249E-28 | 9.5574E-28 |
| SPC25    | ENSG00000152253 | protein_coding | 117.571817 | 1.8378177  | 0.12767017 | 14.3950441 | 5.5589E-47 | 1.1604E-45 |
| G6PC2    | ENSG00000152254 | protein_coding | 10.3204372 | 1.27480848 | 0.24739417 | 5.15294461 | 2.5643E-07 | 6.1927E-07 |
| PDK1     | ENSG00000152256 | protein_coding | 3892.9941  | 1.90757375 | 0.0886     | 21.5301786 | 8.122E-103 | 1.369E-100 |
| PTH      | ENSG00000152266 | protein_coding | 1.09363341 | 2.46130661 | 0.55403877 | 4.44248083 | 8.8928E-06 | 1.8595E-05 |
| TRIM36   | ENSG00000152503 | protein_coding | 130.302749 | 1.26286072 | 0.13031541 | 9.69080135 | 3.2993E-22 | 2.169E-21  |
| GRIA4    | ENSG00000152578 | protein_coding | 904.628395 | 3.63701112 | 0.29922173 | 12.1549031 | 5.4026E-34 | 6.4849E-33 |
| SPARCL1  | ENSG00000152583 | protein_coding | 31117.7285 | 1.60501841 | 0.13825213 | 11.6093579 | 3.6938E-31 | 3.8641E-30 |
| DSPP     | ENSG00000152591 | protein_coding | 1.16752801 | 2.3571484  | 0.38378356 | 6.14186916 | 8.1556E-10 | 2.4259E-09 |
| DMP1     | ENSG00000152592 | protein_coding | 8.92216102 | 3.57264119 | 0.28251069 | 12.6460389 | 1.1766E-36 | 1.6029E-35 |

|           |                 |                |            |            |            |            |            |            |
|-----------|-----------------|----------------|------------|------------|------------|------------|------------|------------|
| GJA1      | ENSG00000152661 | protein_coding | 9579.95158 | 1.75590349 | 0.12015619 | 14.6135086 | 2.3034E-48 | 5.1085E-47 |
| CLEC4F    | ENSG00000152672 | protein_coding | 46.6341425 | 1.519192   | 0.18540377 | 8.19396487 | 2.5276E-16 | 1.1811E-15 |
| RASGRP3   | ENSG00000152689 | protein_coding | 2675.15277 | 1.03856229 | 0.07599134 | 13.6668511 | 1.6018E-42 | 2.7834E-41 |
| CATSPER3  | ENSG00000152705 | protein_coding | 66.8648108 | 1.03325285 | 0.1081069  | 9.55769582 | 1.2041E-21 | 7.6885E-21 |
| RAB3C     | ENSG00000152932 | protein_coding | 137.304962 | 1.4088279  | 0.15900556 | 8.86024325 | 7.984E-19  | 4.3607E-18 |
| PLOD2     | ENSG00000152952 | protein_coding | 18532.8022 | 1.77832522 | 0.13203376 | 13.4687155 | 2.3899E-41 | 3.9493E-40 |
| JAKMIP1   | ENSG00000152969 | protein_coding | 106.270635 | 3.56564059 | 0.18445346 | 19.3308418 | 2.9556E-83 | 2.2848E-81 |
| ZIC1      | ENSG00000152977 | protein_coding | 7.42929855 | 1.59624364 | 0.37639053 | 4.24092406 | 2.226E-05  | 4.4813E-05 |
| CPB1      | ENSG00000153002 | protein_coding | 36.3392168 | 3.15146969 | 0.27658426 | 11.3942479 | 4.4667E-30 | 4.4339E-29 |
| CENPH     | ENSG00000153044 | protein_coding | 252.793159 | 1.36957512 | 0.08715937 | 15.7134586 | 1.2232E-55 | 3.5579E-54 |
| TEKT5     | ENSG00000153060 | protein_coding | 4.03515909 | 1.49751918 | 0.22417186 | 6.68022834 | 2.3857E-11 | 7.9612E-11 |
| CLGN      | ENSG00000153132 | protein_coding | 171.1806   | 1.76788319 | 0.26235356 | 6.73855235 | 1.5997E-11 | 5.3997E-11 |
| PTPRR     | ENSG00000153233 | protein_coding | 106.959325 | 1.52728317 | 0.1579577  | 9.66893794 | 4.086E-22  | 2.675E-21  |
| CD96      | ENSG00000153283 | protein_coding | 663.240591 | 2.46110316 | 0.14526033 | 16.9427071 | 2.1786E-64 | 8.536E-63  |
| SLC25A27  | ENSG00000153291 | protein_coding | 405.043472 | 1.05206513 | 0.16244623 | 6.47638991 | 9.3943E-11 | 2.9985E-10 |
| ADGRF4    | ENSG00000153294 | protein_coding | 51.1976376 | 2.02517814 | 0.33753634 | 5.99988171 | 1.9746E-09 | 5.693E-09  |
| ASAP1     | ENSG00000153317 | protein_coding | 3835.17362 | 1.03219403 | 0.07277927 | 14.1825271 | 1.1754E-45 | 2.3284E-44 |
| LPCAT1    | ENSG00000153395 | protein_coding | 14378.2726 | 2.53754625 | 0.11388943 | 22.2807876 | 5.675E-110 | 1.199E-107 |
| TEX29     | ENSG00000153495 | protein_coding | 15.8037252 | 1.67206073 | 0.18039751 | 9.26875736 | 1.8833E-20 | 1.1262E-19 |
| CD8A      | ENSG00000153563 | protein_coding | 2073.72911 | 3.58105072 | 0.19036458 | 18.811539  | 6.0748E-79 | 4.0832E-77 |
| GOLGA8F   | ENSG00000153684 | protein_coding | 0.78237309 | 1.36285559 | 0.33678994 | 4.04660425 | 5.1966E-05 | 0.00010079 |
| LURAP1L   | ENSG00000153714 | protein_coding | 916.622261 | 1.0147432  | 0.10888865 | 9.31909027 | 1.1734E-20 | 7.1011E-20 |
| CIBAR2    | ENSG00000153789 | protein_coding | 8.31630758 | 1.78506745 | 0.29664563 | 6.01750796 | 1.7712E-09 | 5.1263E-09 |
| TMPRSS11D | ENSG00000153802 | protein_coding | 5.97741939 | 1.87271384 | 0.25583032 | 7.3201402  | 2.4771E-13 | 9.4968E-13 |
| LGI4      | ENSG00000153902 | protein_coding | 5143.25489 | 4.57692725 | 0.23543628 | 19.4401953 | 3.5282E-84 | 2.8425E-82 |

|          |                 |                |            |            |            |            |            |            |
|----------|-----------------|----------------|------------|------------|------------|------------|------------|------------|
| GRAP     | ENSG00000154016 | protein_coding | 174.882544 | 1.06242333 | 0.10304175 | 10.3106107 | 6.3099E-25 | 4.7929E-24 |
| CABYR    | ENSG00000154040 | protein_coding | 87.2429206 | 1.48445986 | 0.12284408 | 12.084098  | 1.2817E-33 | 1.5127E-32 |
| ANKRD29  | ENSG00000154065 | protein_coding | 883.794288 | 1.1028728  | 0.1215933  | 9.07017717 | 1.1882E-19 | 6.8011E-19 |
| CHST9    | ENSG00000154080 | protein_coding | 1205.74518 | 1.19013752 | 0.20621199 | 5.77142724 | 7.8603E-09 | 2.152E-08  |
| C16orf74 | ENSG00000154102 | protein_coding | 488.927654 | 3.06971536 | 0.20975321 | 14.6348907 | 1.6825E-48 | 3.7549E-47 |
| PANX3    | ENSG00000154143 | protein_coding | 1.31792052 | 2.42224885 | 0.41919827 | 5.77828927 | 7.5464E-09 | 2.068E-08  |
| GPR15    | ENSG00000154165 | protein_coding | 25.0122468 | 2.12146188 | 0.28297289 | 7.49704998 | 6.527E-14  | 2.6084E-13 |
| LRRK1    | ENSG00000154237 | protein_coding | 1969.12221 | 1.63172345 | 0.09940009 | 16.415714  | 1.4763E-60 | 5.1E-59    |
| ENPP3    | ENSG00000154269 | protein_coding | 15335.284  | 4.70596303 | 0.18162478 | 25.9103583 | 5.09E-148  | 3.432E-145 |
| ASZ1     | ENSG00000154438 | protein_coding | 1.06708828 | 1.06152271 | 0.44087188 | 2.40778048 | 0.01604983 | 0.02332203 |
| GBP5     | ENSG00000154451 | protein_coding | 1938.26631 | 3.50230669 | 0.18042414 | 19.4115196 | 6.1676E-84 | 4.883E-82  |
| GPR26    | ENSG00000154478 | protein_coding | 4.00879899 | 1.08629566 | 0.27055959 | 4.01499597 | 5.9447E-05 | 0.00011453 |
| LY96     | ENSG00000154589 | protein_coding | 437.066401 | 1.69725722 | 0.13307647 | 12.7539997 | 2.9615E-37 | 4.1377E-36 |
| PSMA8    | ENSG00000154611 | protein_coding | 2.13699141 | 1.37817747 | 0.24647613 | 5.59152508 | 2.2508E-08 | 5.9337E-08 |
| SLFN13   | ENSG00000154760 | protein_coding | 2425.28602 | 2.15992311 | 0.09673668 | 22.3278602 | 1.982E-110 | 4.267E-108 |
| SKA1     | ENSG00000154839 | protein_coding | 89.637352  | 2.12540173 | 0.14709624 | 14.4490552 | 2.5415E-47 | 5.3816E-46 |
| PIEZO2   | ENSG00000154864 | protein_coding | 1771.89417 | 2.13971731 | 0.1322842  | 16.1751534 | 7.5509E-59 | 2.4619E-57 |
| EME1     | ENSG00000154920 | protein_coding | 86.1793871 | 2.08480723 | 0.12989612 | 16.0498037 | 5.7345E-58 | 1.818E-56  |
| SEPTIN14 | ENSG00000154997 | protein_coding | 1.20866606 | 2.07630293 | 0.38670176 | 5.36926167 | 7.906E-08  | 1.9956E-07 |
| CNTNAP5  | ENSG00000155052 | protein_coding | 113.243762 | 1.37647977 | 0.31621812 | 4.35294395 | 1.3432E-05 | 2.7612E-05 |
| MARVELD1 | ENSG00000155254 | protein_coding | 2396.01435 | 1.09779102 | 0.09694892 | 11.3233964 | 1.005E-29  | 9.8337E-29 |
| GOLGA7B  | ENSG00000155265 | protein_coding | 276.5308   | 3.84814842 | 0.188627   | 20.4008352 | 1.6438E-92 | 1.8469E-90 |
| SLC16A1  | ENSG00000155380 | protein_coding | 5105.42833 | 2.02947523 | 0.10391964 | 19.529276  | 6.1911E-85 | 5.1695E-83 |
| TRIM74   | ENSG00000155428 | protein_coding | 7.49138393 | 2.18930995 | 0.22318468 | 9.80940983 | 1.0257E-22 | 6.9307E-22 |
| GRIA1    | ENSG00000155511 | protein_coding | 46.1225386 | 1.70314918 | 0.26789233 | 6.35758836 | 2.0495E-10 | 6.3703E-10 |

|          |                 |                |            |            |            |            |            |            |
|----------|-----------------|----------------|------------|------------|------------|------------|------------|------------|
| TTN      | ENSG00000155657 | protein_coding | 768.056996 | 1.47407319 | 0.134901   | 10.9270735 | 8.5564E-28 | 7.6014E-27 |
| VSIG4    | ENSG00000155659 | protein_coding | 2106.54469 | 1.5901159  | 0.15365508 | 10.3486064 | 4.2462E-25 | 3.2632E-24 |
| OTOA     | ENSG00000155719 | protein_coding | 46.9345104 | 2.92261966 | 0.1510782  | 19.3450785 | 2.2426E-83 | 1.7543E-81 |
| CYLC2    | ENSG00000155833 | protein_coding | 0.77731768 | 2.22889437 | 0.47044608 | 4.73783177 | 2.1602E-06 | 4.7898E-06 |
| ELMO1    | ENSG00000155849 | protein_coding | 2558.86585 | 1.78671489 | 0.08777202 | 20.3563141 | 4.0816E-92 | 4.5085E-90 |
| TRIM42   | ENSG00000155890 | protein_coding | 1.8561535  | 1.08555233 | 0.3431888  | 3.16313451 | 0.0015608  | 0.00257787 |
| ADCY8    | ENSG00000155897 | protein_coding | 309.665542 | 3.2191266  | 0.33989594 | 9.47091808 | 2.7739E-21 | 1.7381E-20 |
| SLA      | ENSG00000155926 | protein_coding | 2151.8181  | 1.7692566  | 0.1195579  | 14.7983243 | 1.5018E-49 | 3.4875E-48 |
| AFF2     | ENSG00000155966 | protein_coding | 185.002681 | 1.18278691 | 0.1459121  | 8.10616071 | 5.2244E-16 | 2.393E-15  |
| MAGEA8   | ENSG00000156009 | protein_coding | 2.74189892 | 1.10210922 | 0.21018244 | 5.2435836  | 1.5749E-07 | 3.8706E-07 |
| MMP16    | ENSG00000156103 | protein_coding | 328.025605 | 2.71854031 | 0.17645551 | 15.4063781 | 1.4829E-53 | 4.0248E-52 |
| KCNMA1   | ENSG00000156113 | protein_coding | 3473.61718 | 2.27606865 | 0.16005017 | 14.2209702 | 6.7905E-46 | 1.354E-44  |
| BATF     | ENSG00000156127 | protein_coding | 197.508151 | 3.01622857 | 0.16281115 | 18.5259338 | 1.2757E-76 | 7.9456E-75 |
| PPEF2    | ENSG00000156194 | protein_coding | 5.80353868 | 2.04543693 | 0.24494577 | 8.3505704  | 6.7934E-17 | 3.2958E-16 |
| SLC28A1  | ENSG00000156222 | protein_coding | 7920.84192 | 1.87832287 | 0.1676482  | 11.2039547 | 3.8993E-29 | 3.7162E-28 |
| CXCL13   | ENSG00000156234 | protein_coding | 368.774028 | 4.18825991 | 0.28018939 | 14.9479604 | 1.6059E-50 | 3.891E-49  |
| MAP3K7CL | ENSG00000156265 | protein_coding | 1793.10712 | 2.10952676 | 0.13704187 | 15.3933011 | 1.8153E-53 | 4.9094E-52 |
| SORCS3   | ENSG00000156395 | protein_coding | 985.990436 | 3.18060928 | 0.31427529 | 10.1204561 | 4.4832E-24 | 3.2554E-23 |
| SH3RF2   | ENSG00000156463 | protein_coding | 370.475223 | 1.29926703 | 0.2076719  | 6.2563448  | 3.941E-10  | 1.2017E-09 |
| GDF6     | ENSG00000156466 | protein_coding | 847.970957 | 3.49755597 | 0.19629075 | 17.8182411 | 5.1015E-71 | 2.5671E-69 |
| FBXO43   | ENSG00000156509 | protein_coding | 30.0477651 | 1.74448411 | 0.14928192 | 11.6858369 | 1.5059E-31 | 1.6099E-30 |
| CD109    | ENSG00000156535 | protein_coding | 5211.2372  | 1.0463364  | 0.1249177  | 8.37620613 | 5.4661E-17 | 2.6668E-16 |
| NODAL    | ENSG00000156574 | protein_coding | 11.4746848 | 1.58183266 | 0.14957477 | 10.5755311 | 3.8698E-26 | 3.1514E-25 |
| PRG3     | ENSG00000156575 | protein_coding | 0.84544268 | 2.27370878 | 0.52711659 | 4.31348359 | 1.607E-05  | 3.2772E-05 |
| UBE2L6   | ENSG00000156587 | protein_coding | 6395.76383 | 1.10482738 | 0.07395109 | 14.9399743 | 1.8105E-50 | 4.3727E-49 |

|         |                 |                |            |            |            |            |            |            |
|---------|-----------------|----------------|------------|------------|------------|------------|------------|------------|
| GLYATL2 | ENSG00000156689 | protein_coding | 79.9511941 | 1.36377675 | 0.15629483 | 8.72566775 | 2.6461E-18 | 1.3996E-17 |
| ITGAD   | ENSG00000156886 | protein_coding | 132.971232 | 4.77729991 | 0.20549502 | 23.2477645 | 1.499E-119 | 4.089E-117 |
| ADGRG4  | ENSG00000156920 | protein_coding | 7.68251923 | 1.13025616 | 0.35587211 | 3.17601776 | 0.00149312 | 0.00247142 |
| BUB1B   | ENSG00000156970 | protein_coding | 225.382035 | 1.3019898  | 0.1290915  | 10.0857905 | 6.3849E-24 | 4.5977E-23 |
| SST     | ENSG00000157005 | protein_coding | 779.890349 | 3.52740042 | 0.36853066 | 9.57152492 | 1.0534E-21 | 6.7547E-21 |
| SHCBP1L | ENSG00000157060 | protein_coding | 0.93846864 | 1.40770504 | 0.37837973 | 3.72035003 | 0.00019895 | 0.00036284 |
| NMNAT2  | ENSG00000157064 | protein_coding | 248.06393  | 1.35607415 | 0.20610802 | 6.57943434 | 4.7224E-11 | 1.5418E-10 |
| ATP2B2  | ENSG00000157087 | protein_coding | 891.342703 | 3.43425873 | 0.20170157 | 17.0264352 | 5.2294E-65 | 2.0991E-63 |
| SLC6A1  | ENSG00000157103 | protein_coding | 461.186108 | 2.28055006 | 0.1429338  | 15.9552883 | 2.6176E-57 | 8.1077E-56 |
| C8A     | ENSG00000157131 | protein_coding | 3.34545428 | 1.07013111 | 0.4880587  | 2.19262786 | 0.0283342  | 0.0397454  |
| CDCP2   | ENSG00000157211 | protein_coding | 4.57521675 | 1.04370152 | 0.19022831 | 5.4865731  | 4.0981E-08 | 1.0569E-07 |
| MMP14   | ENSG00000157227 | protein_coding | 14990.6041 | 1.44402508 | 0.10212936 | 14.1391763 | 2.1782E-45 | 4.2526E-44 |
| FZD1    | ENSG00000157240 | protein_coding | 8927.95866 | 1.25510923 | 0.09713149 | 12.9217543 | 3.3932E-38 | 4.9177E-37 |
| CLEC18A | ENSG00000157322 | protein_coding | 741.874439 | 2.04632141 | 0.21705062 | 9.4278532  | 4.1857E-21 | 2.5957E-20 |
| CLEC18C | ENSG00000157335 | protein_coding | 608.816105 | 1.69232189 | 0.24549268 | 6.89357375 | 5.4408E-12 | 1.8985E-11 |
| ARMC12  | ENSG00000157343 | protein_coding | 27.8202777 | 2.01902265 | 0.17361751 | 11.6291416 | 2.9303E-31 | 3.088E-30  |
| IL34    | ENSG00000157368 | protein_coding | 546.440857 | 1.27115273 | 0.1440626  | 8.82361349 | 1.1082E-18 | 5.9987E-18 |
| CCNB2   | ENSG00000157456 | protein_coding | 282.748163 | 1.73568394 | 0.12905213 | 13.4494794 | 3.1005E-41 | 5.0906E-40 |
| AFAP1L1 | ENSG00000157510 | protein_coding | 2449.54843 | 1.47897705 | 0.09676452 | 15.28429   | 9.7318E-53 | 2.5727E-51 |
| TSC22D3 | ENSG00000157514 | protein_coding | 19992.5305 | 1.10950016 | 0.12424846 | 8.92968953 | 4.2721E-19 | 2.3677E-18 |
| TSPAN18 | ENSG00000157570 | protein_coding | 6594.07353 | 1.3078107  | 0.11642278 | 11.2332889 | 2.7986E-29 | 2.6913E-28 |
| SNX22   | ENSG00000157734 | protein_coding | 228.406368 | 1.24162161 | 0.1195274  | 10.3877573 | 2.819E-25  | 2.1922E-24 |
| ACAN    | ENSG00000157766 | protein_coding | 2504.83277 | 2.59813052 | 0.18125055 | 14.3344696 | 1.3326E-46 | 2.7394E-45 |
| GAREM2  | ENSG00000157833 | protein_coding | 540.256984 | 1.23819153 | 0.10799341 | 11.4654362 | 1.9677E-30 | 1.989E-29  |
| DPYSL5  | ENSG00000157851 | protein_coding | 13.6557736 | 1.02998504 | 0.33563787 | 3.06873903 | 0.00214964 | 0.00349278 |



|          |                 |                |            |            |            |            |            |            |
|----------|-----------------|----------------|------------|------------|------------|------------|------------|------------|
| TNFRSF14 | ENSG00000157873 | protein_coding | 7533.2132  | 2.12640277 | 0.09835883 | 21.6188303 | 1.195E-103 | 2.074E-101 |
| CIB4     | ENSG00000157884 | protein_coding | 62.6554463 | 2.52460813 | 0.24360062 | 10.363718  | 3.6259E-25 | 2.7992E-24 |
| MEGF11   | ENSG00000157890 | protein_coding | 464.00749  | 1.10267353 | 0.23153179 | 4.76251466 | 1.912E-06  | 4.2609E-06 |
| ANKRD61  | ENSG00000157999 | protein_coding | 24.5773895 | 1.21060473 | 0.13395146 | 9.03763771 | 1.6009E-19 | 9.1053E-19 |
| UBXN11   | ENSG00000158062 | protein_coding | 1815.76954 | 1.31544214 | 0.10844545 | 12.1299891 | 7.3259E-34 | 8.7478E-33 |
| GALNT14  | ENSG00000158089 | protein_coding | 12646.0708 | 1.10143599 | 0.11727545 | 9.39187159 | 5.8943E-21 | 3.621E-20  |
| XDH      | ENSG00000158125 | protein_coding | 52.6403458 | 1.21805557 | 0.30994482 | 3.9299111  | 8.4977E-05 | 0.00016119 |
| RNF207   | ENSG00000158286 | protein_coding | 666.620386 | 1.13711987 | 0.13749882 | 8.2700334  | 1.3392E-16 | 6.3756E-16 |
| CDC25C   | ENSG00000158402 | protein_coding | 73.0020383 | 2.71852674 | 0.16343092 | 16.6341032 | 3.9462E-62 | 1.4266E-60 |
| H4C8     | ENSG00000158406 | protein_coding | 153.496237 | 1.12224634 | 0.15811754 | 7.09754512 | 1.2699E-12 | 4.6408E-12 |
| TMSB15B  | ENSG00000158427 | protein_coding | 15.8577117 | 1.5379084  | 0.12207296 | 12.5982726 | 2.1582E-36 | 2.9004E-35 |
| KCNB1    | ENSG00000158445 | protein_coding | 357.903647 | 1.26142476 | 0.18216765 | 6.92452663 | 4.3744E-12 | 1.5372E-11 |
| CD1D     | ENSG00000158473 | protein_coding | 487.779358 | 2.26091985 | 0.09646432 | 23.4378877 | 1.757E-121 | 5.13E-119  |
| CD1A     | ENSG00000158477 | protein_coding | 24.0141785 | 2.44803437 | 0.26049026 | 9.39779624 | 5.5718E-21 | 3.4279E-20 |
| DNAH3    | ENSG00000158486 | protein_coding | 26.0243439 | 1.11905822 | 0.17692019 | 6.32521478 | 2.5288E-10 | 7.811E-10  |
| HMHB1    | ENSG00000158497 | protein_coding | 4.11596287 | 2.76920142 | 0.30973036 | 8.94068452 | 3.8677E-19 | 2.1472E-18 |
| NCF1     | ENSG00000158517 | protein_coding | 226.08405  | 2.28084385 | 0.13281446 | 17.1731587 | 4.2183E-66 | 1.7563E-64 |
| GDPD5    | ENSG00000158555 | protein_coding | 700.308113 | 1.38537333 | 0.10264998 | 13.4960902 | 1.649E-41  | 2.7428E-40 |
| ALAS2    | ENSG00000158578 | protein_coding | 47.6873364 | 1.07586639 | 0.22658651 | 4.7481485  | 2.0529E-06 | 4.5607E-06 |
| PKD1L1   | ENSG00000158683 | protein_coding | 85.9017407 | 1.83464269 | 0.13150615 | 13.9510026 | 3.1021E-44 | 5.7854E-43 |
| SLAMF8   | ENSG00000158714 | protein_coding | 1114.17431 | 2.69588259 | 0.15632143 | 17.2457651 | 1.2041E-66 | 5.1013E-65 |
| DUSP23   | ENSG00000158716 | protein_coding | 3258.67221 | 1.02751569 | 0.11946356 | 8.6010803  | 7.8969E-18 | 4.0561E-17 |
| RNF166   | ENSG00000158717 | protein_coding | 1179.95884 | 1.28210819 | 0.07241913 | 17.7039988 | 3.9056E-70 | 1.8906E-68 |
| NBL1     | ENSG00000158747 | protein_coding | 2352.66758 | 1.18178799 | 0.16853938 | 7.01193976 | 2.3504E-12 | 8.422E-12  |
| HTR6     | ENSG00000158748 | protein_coding | 106.278352 | 6.44573772 | 0.31733237 | 20.3122605 | 1.0019E-91 | 1.073E-89  |

|         |                 |                |            |            |            |            |            |            |
|---------|-----------------|----------------|------------|------------|------------|------------|------------|------------|
| ZNF276  | ENSG00000158805 | protein_coding | 993.81955  | 1.28952297 | 0.09576694 | 13.46522   | 2.5057E-41 | 4.1333E-40 |
| FGF17   | ENSG00000158815 | protein_coding | 14.0391975 | 1.33861    | 0.21026475 | 6.36630727 | 1.9363E-10 | 6.0297E-10 |
| ADAMTS4 | ENSG00000158859 | protein_coding | 4850.36281 | 1.98256731 | 0.16375674 | 12.1067828 | 9.7234E-34 | 1.1523E-32 |
| FCER1G  | ENSG00000158869 | protein_coding | 2686.06965 | 2.52756426 | 0.12088941 | 20.9080709 | 4.5215E-97 | 6.1504E-95 |
| IFNAR2  | ENSG00000159110 | protein_coding | 1420.34772 | 1.09958955 | 0.06522679 | 16.8579438 | 9.1725E-64 | 3.5069E-62 |
| IFNGR2  | ENSG00000159128 | protein_coding | 6379.30632 | 1.10240513 | 0.06138278 | 17.9595175 | 4.0431E-72 | 2.1013E-70 |
| HOXB13  | ENSG00000159184 | protein_coding | 50.8391668 | 3.71535139 | 0.41150831 | 9.02861804 | 1.7385E-19 | 9.8536E-19 |
| C1QC    | ENSG00000159189 | protein_coding | 12029.172  | 2.74300255 | 0.13658819 | 20.0822818 | 1.0544E-89 | 1.0485E-87 |
| CIART   | ENSG00000159208 | protein_coding | 569.186616 | 1.33710007 | 0.11066068 | 12.0828834 | 1.3008E-33 | 1.5337E-32 |
| RUNX1   | ENSG00000159216 | protein_coding | 3698.26095 | 1.76667454 | 0.12820052 | 13.7805569 | 3.3369E-43 | 5.9636E-42 |
| GIP     | ENSG00000159224 | protein_coding | 1.67232361 | 2.86698206 | 0.51020826 | 5.61923887 | 1.918E-08  | 5.0879E-08 |
| CBR3    | ENSG00000159231 | protein_coding | 199.569243 | 1.24191298 | 0.12588648 | 9.86534063 | 5.8834E-23 | 4.0158E-22 |
| GOLGA6A | ENSG00000159289 | protein_coding | 0.96796501 | 1.85676219 | 0.32429612 | 5.72551469 | 1.0312E-08 | 2.7968E-08 |
| PLA2G4D | ENSG00000159337 | protein_coding | 31.479595  | 4.4776261  | 0.32628538 | 13.7230364 | 7.3904E-43 | 1.305E-41  |
| PADI4   | ENSG00000159339 | protein_coding | 21.7350367 | 1.10391789 | 0.19212301 | 5.74589109 | 9.1438E-09 | 2.4913E-08 |
| HK2     | ENSG00000159399 | protein_coding | 5338.1895  | 3.4234343  | 0.13364681 | 25.6155339 | 1.024E-144 | 5.726E-142 |
| C1R     | ENSG00000159403 | protein_coding | 18338.7426 | 1.10200114 | 0.17280123 | 6.37727591 | 1.8027E-10 | 5.6272E-10 |
| STARD9  | ENSG00000159433 | protein_coding | 1171.47795 | 1.50454855 | 0.10981481 | 13.7007794 | 1.0044E-42 | 1.7614E-41 |
| RGL4    | ENSG00000159496 | protein_coding | 92.4074968 | 1.91859081 | 0.12331242 | 15.5587797 | 1.3872E-54 | 3.8893E-53 |
| ISL2    | ENSG00000159556 | protein_coding | 7.16896782 | 2.54955138 | 0.3020528  | 8.44074738 | 3.1531E-17 | 1.562E-16  |
| CCDC17  | ENSG00000159588 | protein_coding | 68.1748649 | 1.20826904 | 0.151695   | 7.96512113 | 1.6506E-15 | 7.3391E-15 |
| ACE     | ENSG00000159640 | protein_coding | 2427.3248  | 1.07980004 | 0.13409737 | 8.05235805 | 8.1214E-16 | 3.6766E-15 |
| UROC1   | ENSG00000159650 | protein_coding | 8.1265021  | 2.03000794 | 0.23810054 | 8.52584338 | 1.517E-17  | 7.6621E-17 |
| SPON2   | ENSG00000159674 | protein_coding | 4871.43239 | 1.77081895 | 0.18378214 | 9.63542441 | 5.6657E-22 | 3.6845E-21 |
| LRRC36  | ENSG00000159708 | protein_coding | 131.558463 | 1.81500522 | 0.1321643  | 13.7329463 | 6.4458E-43 | 1.1409E-41 |

|           |                 |                |            |            |            |            |            |            |
|-----------|-----------------|----------------|------------|------------|------------|------------|------------|------------|
| CARMIL2   | ENSG00000159753 | protein_coding | 203.446548 | 2.49987709 | 0.1666719  | 14.9987912 | 7.4769E-51 | 1.8309E-49 |
| PIP       | ENSG00000159763 | protein_coding | 18.1613015 | 2.9133247  | 0.45677066 | 6.37809064 | 1.7931E-10 | 5.5989E-10 |
| TNFRSF13C | ENSG00000159958 | protein_coding | 68.6768189 | 1.17686184 | 0.18093142 | 6.50446375 | 7.7971E-11 | 2.5047E-10 |
| ATAD3B    | ENSG00000160072 | protein_coding | 602.795698 | 1.41901384 | 0.12798917 | 11.086984  | 1.451E-28  | 1.3391E-27 |
| ANKLE1    | ENSG00000160117 | protein_coding | 32.3887542 | 2.04436956 | 0.15321726 | 13.3429459 | 1.3021E-40 | 2.0834E-39 |
| CILP2     | ENSG00000160161 | protein_coding | 44.8058252 | 1.9274612  | 0.24265509 | 7.94321349 | 1.9701E-15 | 8.7156E-15 |
| ABCG1     | ENSG00000160179 | protein_coding | 3993.7749  | 1.28561918 | 0.08333824 | 15.426522  | 1.0857E-53 | 2.9553E-52 |
| TFF2      | ENSG00000160181 | protein_coding | 16.9508277 | 1.5564241  | 0.36116074 | 4.30950521 | 1.6362E-05 | 3.3343E-05 |
| UBASH3A   | ENSG00000160185 | protein_coding | 173.856319 | 2.78296105 | 0.16129759 | 17.2535812 | 1.0517E-66 | 4.4849E-65 |
| U2AF1     | ENSG00000160201 | protein_coding | 61.6590676 | 1.59066635 | 0.17838324 | 8.91712884 | 4.7853E-19 | 2.6468E-18 |
| GAB3      | ENSG00000160219 | protein_coding | 486.633348 | 1.60775549 | 0.08504379 | 18.9050304 | 1.0368E-79 | 7.1578E-78 |
| ITGB2     | ENSG00000160255 | protein_coding | 8539.44885 | 2.37875111 | 0.11976913 | 19.8611371 | 8.8289E-88 | 8.1928E-86 |
| RALGDS    | ENSG00000160271 | protein_coding | 3442.6058  | 1.11438961 | 0.06921244 | 16.1010005 | 2.5101E-58 | 8.0466E-57 |
| C21orf58  | ENSG00000160298 | protein_coding | 147.91933  | 1.26424643 | 0.10909902 | 11.5880645 | 4.7372E-31 | 4.9342E-30 |
| LCN1      | ENSG00000160349 | protein_coding | 4.22919671 | 4.17270037 | 0.34843335 | 11.9756055 | 4.7694E-33 | 5.4755E-32 |
| NLRP4     | ENSG00000160505 | protein_coding | 3.58673588 | 1.65152796 | 0.26623806 | 6.20320005 | 5.5326E-10 | 1.6679E-09 |
| JAML      | ENSG00000160593 | protein_coding | 1029.8667  | 1.66237954 | 0.11788221 | 14.1020386 | 3.6896E-45 | 7.1364E-44 |
| CD3G      | ENSG00000160654 | protein_coding | 418.55306  | 2.53965329 | 0.16064577 | 15.8090267 | 2.696E-56  | 7.9888E-55 |
| SHC1      | ENSG00000160691 | protein_coding | 8723.79833 | 1.06687095 | 0.07036065 | 15.162893  | 6.2265E-52 | 1.6008E-50 |
| PAQR6     | ENSG00000160781 | protein_coding | 183.48298  | 2.59043843 | 0.17473285 | 14.8251371 | 1.0077E-49 | 2.3605E-48 |
| CCR5      | ENSG00000160791 | protein_coding | 1108.05769 | 2.88118068 | 0.15625993 | 18.4383848 | 6.4644E-76 | 3.9094E-74 |
| PPP1R35   | ENSG00000160813 | protein_coding | 668.448155 | 1.02884428 | 0.10058532 | 10.2285733 | 1.4768E-24 | 1.1031E-23 |
| LRRC71    | ENSG00000160838 | protein_coding | 24.8014111 | 2.99721574 | 0.20126931 | 14.8915689 | 3.7389E-50 | 8.9083E-49 |
| FCRL3     | ENSG00000160856 | protein_coding | 181.704295 | 2.80527262 | 0.19785784 | 14.1782233 | 1.2497E-45 | 2.4714E-44 |
| CYP11B1   | ENSG00000160882 | protein_coding | 0.49763879 | 1.56279718 | 0.46686236 | 3.34744734 | 0.00081559 | 0.00139019 |

|         |                 |                |            |            |            |            |            |            |
|---------|-----------------|----------------|------------|------------|------------|------------|------------|------------|
| HK3     | ENSG00000160883 | protein_coding | 312.182794 | 2.58034957 | 0.13444872 | 19.1920719 | 4.311E-82  | 3.2134E-80 |
| LY6E    | ENSG00000160932 | protein_coding | 15584.2578 | 1.68039625 | 0.14497152 | 11.5912161 | 4.566E-31  | 4.7596E-30 |
| FOXH1   | ENSG00000160973 | protein_coding | 7.57705873 | 2.00134555 | 0.21360855 | 9.36922006 | 7.307E-21  | 4.4644E-20 |
| CCDC105 | ENSG00000160994 | protein_coding | 0.87220181 | 2.10287112 | 0.52579758 | 3.99939295 | 6.3505E-05 | 0.00012193 |
| SH2B2   | ENSG00000160999 | protein_coding | 362.026007 | 1.28885959 | 0.09658725 | 13.3439928 | 1.2839E-40 | 2.0551E-39 |
| MRNIP   | ENSG00000161010 | protein_coding | 1454.17299 | 1.1896572  | 0.10367529 | 11.4748383 | 1.7651E-30 | 1.7889E-29 |
| PGLYRP2 | ENSG00000161031 | protein_coding | 20.8857937 | 3.4166266  | 0.31081481 | 10.9924834 | 4.1534E-28 | 3.7509E-27 |
| SCGB3A1 | ENSG00000161055 | protein_coding | 41.3586827 | 1.69438545 | 0.18060235 | 9.38185702 | 6.4821E-21 | 3.9704E-20 |
| CELF5   | ENSG00000161082 | protein_coding | 80.1491316 | 1.88522388 | 0.27667186 | 6.81393419 | 9.4965E-12 | 3.2568E-11 |
| CCDC116 | ENSG00000161180 | protein_coding | 15.2529906 | 1.67823089 | 0.15441203 | 10.8685246 | 1.6281E-27 | 1.4246E-26 |
| U2AF1L4 | ENSG00000161265 | protein_coding | 450.702635 | 1.1326908  | 0.10906083 | 10.385863  | 2.8756E-25 | 2.235E-24  |
| PLXDC1  | ENSG00000161381 | protein_coding | 2784.53182 | 2.86418495 | 0.12401474 | 23.0955197 | 5.136E-118 | 1.33E-115  |
| IKZF3   | ENSG00000161405 | protein_coding | 1027.26086 | 2.55713067 | 0.16106635 | 15.8762563 | 9.2539E-57 | 2.7909E-55 |
| FDXR    | ENSG00000161513 | protein_coding | 1519.44995 | 1.39669846 | 0.09227757 | 15.1358399 | 9.3973E-52 | 2.384E-50  |
| CYGB    | ENSG00000161544 | protein_coding | 2505.91579 | 2.01142909 | 0.12078252 | 16.6533124 | 2.8631E-62 | 1.0416E-60 |
| KASH5   | ENSG00000161609 | protein_coding | 4.19220435 | 1.75012798 | 0.29458161 | 5.9410633  | 2.8318E-09 | 8.0549E-09 |
| ITGA5   | ENSG00000161638 | protein_coding | 11768.8377 | 1.95451302 | 0.11012353 | 17.748368  | 1.7744E-70 | 8.6807E-69 |
| FMNL3   | ENSG00000161791 | protein_coding | 5350.76383 | 1.26528382 | 0.07429879 | 17.02967   | 4.9482E-65 | 1.9898E-63 |
| KRT84   | ENSG00000161849 | protein_coding | 1.25921499 | 2.86254483 | 0.35847863 | 7.98525924 | 1.4023E-15 | 6.2665E-15 |
| KRT82   | ENSG00000161850 | protein_coding | 1.11866012 | 2.17329523 | 0.45079889 | 4.8209862  | 1.4285E-06 | 3.2212E-06 |
| SYCE2   | ENSG00000161860 | protein_coding | 37.1735821 | 1.01168437 | 0.12588631 | 8.03649241 | 9.2447E-16 | 4.1699E-15 |
| SPC24   | ENSG00000161888 | protein_coding | 216.422368 | 2.31309663 | 0.14288239 | 16.1888154 | 6.0482E-59 | 1.9818E-57 |
| TREML1  | ENSG00000161911 | protein_coding | 35.472368  | 2.94139297 | 0.15970729 | 18.4173998 | 9.5271E-76 | 5.6866E-74 |
| SCIMP   | ENSG00000161929 | protein_coding | 421.552282 | 1.94736296 | 0.12413683 | 15.6872299 | 1.8495E-55 | 5.3458E-54 |
| BCL6B   | ENSG00000161940 | protein_coding | 2786.16596 | 1.32180239 | 0.11823979 | 11.1789981 | 5.167E-29  | 4.8928E-28 |

|        |                 |                |            |            |            |            |            |            |
|--------|-----------------|----------------|------------|------------|------------|------------|------------|------------|
| FGF11  | ENSG00000161958 | protein_coding | 144.382543 | 1.66585465 | 0.22089654 | 7.54133428 | 4.6519E-14 | 1.8762E-13 |
| EIF4A1 | ENSG00000161960 | protein_coding | 519.675702 | 2.1190538  | 0.13835298 | 15.3162856 | 5.9523E-53 | 1.5809E-51 |
| WDR90  | ENSG00000161996 | protein_coding | 1619.37114 | 1.32390782 | 0.09646532 | 13.7241849 | 7.2743E-43 | 1.285E-41  |
| CCDC78 | ENSG00000162004 | protein_coding | 121.237689 | 2.84325958 | 0.2266713  | 12.5435358 | 4.3131E-36 | 5.7094E-35 |
| MSLNL  | ENSG00000162006 | protein_coding | 5.77632992 | 2.81075618 | 0.44656462 | 6.29417569 | 3.0904E-10 | 9.4899E-10 |
| MEIOB  | ENSG00000162039 | protein_coding | 3.03079569 | 1.33091604 | 0.28442715 | 4.67928622 | 2.8788E-06 | 6.312E-06  |
| TEDC2  | ENSG00000162062 | protein_coding | 67.9038281 | 1.01275734 | 0.13164436 | 7.69313122 | 1.4358E-14 | 5.9823E-14 |
| PAQR4  | ENSG00000162073 | protein_coding | 385.406749 | 1.73022626 | 0.11281567 | 15.3367548 | 4.3437E-53 | 1.1577E-51 |
| LBHD1  | ENSG00000162194 | protein_coding | 180.111929 | 1.0304838  | 0.08907083 | 11.5692623 | 5.8988E-31 | 6.1081E-30 |
| ITIH3  | ENSG00000162267 | protein_coding | 264.465041 | 1.31734258 | 0.21007456 | 6.27083344 | 3.5912E-10 | 1.0983E-09 |
| FGF19  | ENSG00000162344 | protein_coding | 1.01585996 | 1.18107574 | 0.45817924 | 2.57775918 | 0.00994433 | 0.01488807 |
| ELAVL4 | ENSG00000162374 | protein_coding | 15.2864495 | 1.58881006 | 0.14389978 | 11.0410874 | 2.4209E-28 | 2.2102E-27 |
| SLC1A7 | ENSG00000162383 | protein_coding | 121.662985 | 2.14401909 | 0.24733573 | 8.66845679 | 4.3802E-18 | 2.2882E-17 |
| CTRC   | ENSG00000162438 | protein_coding | 6.02809063 | 2.92640729 | 0.27344341 | 10.7020581 | 9.9542E-27 | 8.3804E-26 |
| MATN1  | ENSG00000162510 | protein_coding | 19.1588696 | 1.65608694 | 0.13547228 | 12.2245443 | 2.2987E-34 | 2.8017E-33 |
| LAPTM5 | ENSG00000162511 | protein_coding | 17445.5479 | 2.52783432 | 0.11540944 | 21.9031855 | 2.422E-106 | 4.57E-104  |
| SDC3   | ENSG00000162512 | protein_coding | 6642.52648 | 1.06290116 | 0.08659632 | 12.2742076 | 1.2461E-34 | 1.5409E-33 |
| SCNN1D | ENSG00000162572 | protein_coding | 230.89541  | 2.38044159 | 0.17071059 | 13.944311  | 3.4072E-44 | 6.3441E-43 |
| MXRA8  | ENSG00000162576 | protein_coding | 4236.45484 | 1.24720469 | 0.17312805 | 7.2039437  | 5.8496E-13 | 2.1854E-12 |
| MEGF6  | ENSG00000162591 | protein_coding | 1274.82717 | 1.30640731 | 0.1389605  | 9.40128537 | 5.3901E-21 | 3.3175E-20 |
| ADGRL4 | ENSG00000162618 | protein_coding | 5849.90991 | 1.00773282 | 0.11396908 | 8.84215982 | 9.3886E-19 | 5.1041E-18 |
| LRRC53 | ENSG00000162621 | protein_coding | 1.27955113 | 1.08125417 | 0.31082447 | 3.47866487 | 0.00050392 | 0.00087917 |
| LHX8   | ENSG00000162624 | protein_coding | 28.134376  | 5.50356416 | 0.43364216 | 12.6914877 | 6.5922E-37 | 9.0694E-36 |
| GBP2   | ENSG00000162645 | protein_coding | 8129.12384 | 1.98234436 | 0.10414567 | 19.0343429 | 8.8597E-81 | 6.336E-79  |
| GBP4   | ENSG00000162654 | protein_coding | 7857.80515 | 1.22531887 | 0.12158803 | 10.0776274 | 6.9381E-24 | 4.9828E-23 |

|           |                 |                |            |            |            |            |            |            |
|-----------|-----------------|----------------|------------|------------|------------|------------|------------|------------|
| GFI1      | ENSG00000162676 | protein_coding | 158.698218 | 2.46875632 | 0.1487142  | 16.6006761 | 6.891E-62  | 2.4641E-60 |
| VCAM1     | ENSG00000162692 | protein_coding | 32624.2059 | 1.79136445 | 0.14753056 | 12.1423279 | 6.3008E-34 | 7.5394E-33 |
| CADM3     | ENSG00000162706 | protein_coding | 956.524349 | 2.99975814 | 0.27426565 | 10.9374183 | 7.6343E-28 | 6.8033E-27 |
| NLRP3     | ENSG00000162711 | protein_coding | 370.765197 | 1.34159148 | 0.11675937 | 11.4902259 | 1.4773E-30 | 1.5042E-29 |
| SLAMF9    | ENSG00000162723 | protein_coding | 5.53570538 | 1.98832148 | 0.32326328 | 6.15078053 | 7.7103E-10 | 2.299E-09  |
| SLAMF6    | ENSG00000162739 | protein_coding | 521.213491 | 2.51246845 | 0.15617309 | 16.087717  | 3.111E-58  | 9.9519E-57 |
| OLFML2B   | ENSG00000162745 | protein_coding | 3652.26875 | 2.67436633 | 0.13609254 | 19.6510866 | 5.6588E-86 | 4.9223E-84 |
| FCGR3B    | ENSG00000162747 | protein_coding | 143.502466 | 1.27327967 | 0.19830752 | 6.42073305 | 1.3562E-10 | 4.274E-10  |
| SLC9C2    | ENSG00000162753 | protein_coding | 21.5657459 | 1.21422025 | 0.27073109 | 4.48496793 | 7.2925E-06 | 1.5381E-05 |
| FAM71A    | ENSG00000162771 | protein_coding | 0.73768553 | 1.64927885 | 0.43264266 | 3.81210411 | 0.00013779 | 0.00025558 |
| KLHDC8A   | ENSG00000162873 | protein_coding | 161.932067 | 1.70064782 | 0.17883512 | 9.50958505 | 1.9142E-21 | 1.2099E-20 |
| IL24      | ENSG00000162892 | protein_coding | 92.8765043 | 1.12549865 | 0.11452615 | 9.82743799 | 8.5773E-23 | 5.8173E-22 |
| FCMR      | ENSG00000162894 | protein_coding | 501.457217 | 1.46691201 | 0.11727944 | 12.5078356 | 6.7642E-36 | 8.8822E-35 |
| DISC1     | ENSG00000162946 | protein_coding | 700.496628 | 1.64279481 | 0.08136658 | 20.1900443 | 1.1976E-90 | 1.2281E-88 |
| KCNF1     | ENSG00000162975 | protein_coding | 133.813536 | 1.50931712 | 0.20137281 | 7.49513847 | 6.6228E-14 | 2.6455E-13 |
| FRZB      | ENSG00000162998 | protein_coding | 7568.18359 | 2.02271201 | 0.19498774 | 10.3735345 | 3.2719E-25 | 2.5349E-24 |
| FBXO41    | ENSG00000163013 | protein_coding | 498.565183 | 1.973552   | 0.16210363 | 12.1746314 | 4.2431E-34 | 5.1159E-33 |
| ACTG2     | ENSG00000163017 | protein_coding | 1698.28844 | 1.64401291 | 0.19985353 | 8.22608889 | 1.9343E-16 | 9.0998E-16 |
| CCDC74A   | ENSG00000163040 | protein_coding | 657.669348 | 1.50328469 | 0.12826886 | 11.7197946 | 1.0092E-31 | 1.0867E-30 |
| ANKRD30BL | ENSG00000163046 | protein_coding | 1.40896762 | 2.25054613 | 0.45576449 | 4.93795846 | 7.8945E-07 | 1.8247E-06 |
| TEKT4     | ENSG00000163060 | protein_coding | 5.79559353 | 1.11578409 | 0.24877079 | 4.48518936 | 7.2849E-06 | 1.5366E-05 |
| EN1       | ENSG00000163064 | protein_coding | 24.6115948 | 3.58875076 | 0.26018367 | 13.7931435 | 2.8028E-43 | 5.0286E-42 |
| SPATA18   | ENSG00000163071 | protein_coding | 2630.36437 | 1.67038153 | 0.11413362 | 14.6353155 | 1.672E-48  | 3.7333E-47 |
| INHBB     | ENSG00000163083 | protein_coding | 4146.03017 | 3.80876196 | 0.15654667 | 24.3298823 | 9.468E-131 | 3.678E-128 |
| ANKRD23   | ENSG00000163126 | protein_coding | 50.8695587 | 1.59531443 | 0.13374783 | 11.927778  | 8.4807E-33 | 9.5944E-32 |



|           |                 |                |            |            |            |            |            |            |
|-----------|-----------------|----------------|------------|------------|------------|------------|------------|------------|
| CTSS      | ENSG00000163131 | protein_coding | 9207.44593 | 1.92542853 | 0.12023916 | 16.0133231 | 1.0315E-57 | 3.2409E-56 |
| MSX1      | ENSG00000163132 | protein_coding | 255.198606 | 1.36675847 | 0.11076506 | 12.3392562 | 5.5668E-35 | 6.9895E-34 |
| TNFAIP8L2 | ENSG00000163154 | protein_coding | 396.819671 | 2.25147531 | 0.11769735 | 19.1293621 | 1.4382E-81 | 1.0583E-79 |
| RNF149    | ENSG00000163162 | protein_coding | 5302.25493 | 1.31606924 | 0.06327287 | 20.7998984 | 4.3373E-96 | 5.6645E-94 |
| SPRR3     | ENSG00000163209 | protein_coding | 3.78351201 | 3.12128385 | 0.55518825 | 5.62202788 | 1.8873E-08 | 5.0113E-08 |
| BMP10     | ENSG00000163217 | protein_coding | 0.35248195 | 1.16994482 | 0.36325701 | 3.22070815 | 0.00127874 | 0.00213322 |
| PGLYRP4   | ENSG00000163218 | protein_coding | 1.50997787 | 1.87472966 | 0.36312854 | 5.16271636 | 2.4339E-07 | 5.8868E-07 |
| ARHGAP25  | ENSG00000163219 | protein_coding | 1794.02789 | 1.74912296 | 0.0808     | 21.6475624 | 6.408E-104 | 1.121E-101 |
| S100A9    | ENSG00000163220 | protein_coding | 1239.97741 | 1.05980921 | 0.15778496 | 6.71679473 | 1.8577E-11 | 6.2418E-11 |
| S100A12   | ENSG00000163221 | protein_coding | 46.1926941 | 1.28973836 | 0.19095017 | 6.75431882 | 1.4351E-11 | 4.8626E-11 |
| TGFA      | ENSG00000163235 | protein_coding | 8604.99826 | 1.66120887 | 0.13335391 | 12.4571438 | 1.2787E-35 | 1.6596E-34 |
| TDRD10    | ENSG00000163239 | protein_coding | 113.426861 | 1.15559021 | 0.13634416 | 8.47553875 | 2.3399E-17 | 1.1694E-16 |
| NPPC      | ENSG00000163273 | protein_coding | 27.2828434 | 1.12079038 | 0.3176182  | 3.52873481 | 0.00041755 | 0.00073467 |
| ALPI      | ENSG00000163295 | protein_coding | 615.895822 | 2.4319531  | 0.34385438 | 7.0726251  | 1.5203E-12 | 5.5294E-12 |
| LENEP     | ENSG00000163352 | protein_coding | 2.64186392 | 1.05237371 | 0.23086284 | 4.55843695 | 5.1536E-06 | 1.1028E-05 |
| DCST2     | ENSG00000163354 | protein_coding | 41.7839495 | 1.9933723  | 0.15948256 | 12.498999  | 7.5597E-36 | 9.8956E-35 |
| DCST1     | ENSG00000163357 | protein_coding | 17.1952609 | 2.48464051 | 0.20311968 | 12.2323966 | 2.0869E-34 | 2.547E-33  |
| COL6A3    | ENSG00000163359 | protein_coding | 12713.8184 | 1.40349573 | 0.18370613 | 7.63989614 | 2.174E-14  | 8.9547E-14 |
| IGFN1     | ENSG00000163395 | protein_coding | 195.173794 | 4.12283407 | 0.37728132 | 10.9277451 | 8.4933E-28 | 7.5483E-27 |
| FSTL1     | ENSG00000163430 | protein_coding | 29195.5946 | 1.35653146 | 0.11429108 | 11.8690929 | 1.7132E-32 | 1.9108E-31 |
| PDCL2     | ENSG00000163440 | protein_coding | 1.35576256 | 2.80078037 | 0.50105221 | 5.58979749 | 2.2733E-08 | 5.9906E-08 |
| TRIM46    | ENSG00000163462 | protein_coding | 120.319313 | 1.92697729 | 0.17478753 | 11.0246843 | 2.9054E-28 | 2.6426E-27 |
| CCDC141   | ENSG00000163492 | protein_coding | 119.240187 | 2.11772333 | 0.15034802 | 14.0854752 | 4.6651E-45 | 8.9779E-44 |
| CRYBA2    | ENSG00000163499 | protein_coding | 0.70118471 | 1.86736159 | 0.54494587 | 3.42669188 | 0.00061098 | 0.0010555  |
| EOMES     | ENSG00000163508 | protein_coding | 388.444508 | 3.50248299 | 0.18174104 | 19.2718328 | 9.2598E-83 | 7.0746E-81 |

|          |                 |                |            |            |            |            |            |            |
|----------|-----------------|----------------|------------|------------|------------|------------|------------|------------|
| RETNLB   | ENSG00000163515 | protein_coding | 0.76383373 | 1.90768373 | 0.54813876 | 3.48029343 | 0.00050086 | 0.00087414 |
| ANKZF1   | ENSG00000163516 | protein_coding | 2584.55114 | 1.44418997 | 0.09738781 | 14.8292691 | 9.4759E-50 | 2.2219E-48 |
| FCRL4    | ENSG00000163518 | protein_coding | 1.73196907 | 2.69920739 | 0.43381297 | 6.22205319 | 4.9069E-10 | 1.4861E-09 |
| TRAT1    | ENSG00000163519 | protein_coding | 147.290642 | 2.34704665 | 0.17251513 | 13.6048745 | 3.7461E-42 | 6.3838E-41 |
| GLB1L    | ENSG00000163521 | protein_coding | 2932.64641 | 1.12974069 | 0.11044766 | 10.2287429 | 1.4742E-24 | 1.1014E-23 |
| SPTA1    | ENSG00000163554 | protein_coding | 27.999516  | 2.67294759 | 0.20128957 | 13.279116  | 3.0598E-40 | 4.8235E-39 |
| MNDA     | ENSG00000163563 | protein_coding | 919.412819 | 1.7839807  | 0.12356342 | 14.4377741 | 2.9935E-47 | 6.3238E-46 |
| PYHIN1   | ENSG00000163564 | protein_coding | 247.097615 | 2.95879361 | 0.15816904 | 18.7065288 | 4.3799E-78 | 2.8601E-76 |
| IFI16    | ENSG00000163565 | protein_coding | 5999.56423 | 1.60403374 | 0.08711636 | 18.4125429 | 1.0421E-75 | 6.2042E-74 |
| AIM2     | ENSG00000163568 | protein_coding | 135.309728 | 3.04706217 | 0.19581735 | 15.5607366 | 1.3454E-54 | 3.7791E-53 |
| RPL22L1  | ENSG00000163584 | protein_coding | 1181.61505 | 1.39833843 | 0.11291604 | 12.3838778 | 3.1952E-35 | 4.0575E-34 |
| CTLA4    | ENSG00000163599 | protein_coding | 97.2207344 | 2.94430362 | 0.1893004  | 15.5536048 | 1.504E-54  | 4.209E-53  |
| ICOS     | ENSG00000163600 | protein_coding | 96.3059547 | 3.35315383 | 0.18892704 | 17.7484065 | 1.7731E-70 | 8.6807E-69 |
| CD200R1  | ENSG00000163606 | protein_coding | 225.718111 | 2.24957466 | 0.16629305 | 13.5277728 | 1.0722E-41 | 1.79E-40   |
| CLRN1    | ENSG00000163646 | protein_coding | 1.07819255 | 2.13113476 | 0.38691588 | 5.50800534 | 3.6292E-08 | 9.403E-08  |
| DCLK3    | ENSG00000163673 | protein_coding | 55.1306251 | 3.29772376 | 0.17786387 | 18.5407176 | 9.692E-77  | 6.0613E-75 |
| CFAP20DC | ENSG00000163689 | protein_coding | 273.099115 | 1.65460764 | 0.11949038 | 13.8472039 | 1.3226E-43 | 2.4126E-42 |
| FANCD2OS | ENSG00000163705 | protein_coding | 1.87556275 | 1.75201242 | 0.34346763 | 5.10095359 | 3.3795E-07 | 8.0729E-07 |
| CXCL5    | ENSG00000163735 | protein_coding | 602.113684 | 4.99310319 | 0.32763325 | 15.239916  | 1.9212E-52 | 5.0124E-51 |
| PF4      | ENSG00000163737 | protein_coding | 13.6755411 | 1.01070121 | 0.20199561 | 5.00358002 | 5.6275E-07 | 1.3183E-06 |
| CXCL1    | ENSG00000163739 | protein_coding | 527.323188 | 1.37502075 | 0.2448298  | 5.61623108 | 1.9517E-08 | 5.173E-08  |
| CPA3     | ENSG00000163751 | protein_coding | 628.385229 | 1.30339434 | 0.17558393 | 7.42319843 | 1.1433E-13 | 4.4927E-13 |
| DNAJC5G  | ENSG00000163793 | protein_coding | 1.61391524 | 1.60027424 | 0.32447026 | 4.93195969 | 8.1409E-07 | 1.8793E-06 |
| UCN      | ENSG00000163794 | protein_coding | 55.0766206 | 2.58554758 | 0.15268402 | 16.933976  | 2.5272E-64 | 9.8847E-63 |
| PLB1     | ENSG00000163803 | protein_coding | 279.762012 | 1.31357424 | 0.10371579 | 12.6651328 | 9.2264E-37 | 1.2625E-35 |

|         |                 |                |            |            |            |            |            |            |
|---------|-----------------|----------------|------------|------------|------------|------------|------------|------------|
| SPDYA   | ENSG00000163806 | protein_coding | 44.7043942 | 1.66671215 | 0.15006126 | 11.1068783 | 1.1615E-28 | 1.0778E-27 |
| KIF15   | ENSG00000163808 | protein_coding | 115.165321 | 1.20751189 | 0.1297386  | 9.30726807 | 1.3116E-20 | 7.9197E-20 |
| CCR1    | ENSG00000163823 | protein_coding | 971.151892 | 1.11622777 | 0.13965267 | 7.99288518 | 1.3182E-15 | 5.8993E-15 |
| YEATS2  | ENSG00000163872 | protein_coding | 3255.86699 | 1.08002257 | 0.06349649 | 17.0091707 | 7.0225E-65 | 2.8115E-63 |
| GRIK3   | ENSG00000163873 | protein_coding | 1575.06531 | 4.99828464 | 0.18533039 | 26.9695907 | 3.361E-160 | 2.963E-157 |
| CAMK2N2 | ENSG00000163888 | protein_coding | 27.9315753 | 1.90926732 | 0.19495349 | 9.79345058 | 1.2012E-22 | 8.0921E-22 |
| HEYL    | ENSG00000163909 | protein_coding | 4250.13715 | 1.61045588 | 0.13075754 | 12.3163524 | 7.3965E-35 | 9.2387E-34 |
| RHO     | ENSG00000163914 | protein_coding | 2.98725156 | 1.34001191 | 0.25279499 | 5.30078502 | 1.1531E-07 | 2.8661E-07 |
| ZDHHC19 | ENSG00000163958 | protein_coding | 10.9907777 | 1.75959476 | 0.17065098 | 10.3110734 | 6.2796E-25 | 4.7707E-24 |
| SLC9B2  | ENSG00000164038 | protein_coding | 376.707266 | 1.08979535 | 0.10106096 | 10.7835438 | 4.1171E-27 | 3.5363E-26 |
| CAMP    | ENSG00000164047 | protein_coding | 7.50953236 | 1.39753151 | 0.23942227 | 5.83709919 | 5.3117E-09 | 1.4773E-08 |
| SPRY1   | ENSG00000164056 | protein_coding | 6748.37552 | 1.32484988 | 0.11613434 | 11.4079081 | 3.818E-30  | 3.7974E-29 |
| CAMKV   | ENSG00000164076 | protein_coding | 3.89561037 | 1.26689274 | 0.38677122 | 3.27556105 | 0.00105452 | 0.00177598 |
| GRM2    | ENSG00000164082 | protein_coding | 27.3170236 | 1.29976251 | 0.14724937 | 8.82694796 | 1.0757E-18 | 5.8309E-18 |
| PITX2   | ENSG00000164093 | protein_coding | 111.180444 | 1.49301774 | 0.3290356  | 4.53755686 | 5.691E-06  | 1.2129E-05 |
| SAP30   | ENSG00000164105 | protein_coding | 1006.19051 | 2.46961986 | 0.08663017 | 28.5076202 | 9.425E-179 | 1.394E-175 |
| TMEM155 | ENSG00000164112 | protein_coding | 97.5278434 | 5.12386849 | 0.21233103 | 24.1315102 | 1.168E-128 | 4.215E-126 |
| ADAD1   | ENSG00000164113 | protein_coding | 0.95659018 | 1.95648693 | 0.51851129 | 3.77327742 | 0.00016112 | 0.00029661 |
| C4orf45 | ENSG00000164123 | protein_coding | 4.14411007 | 1.08163247 | 0.20817699 | 5.19573501 | 2.0391E-07 | 4.9642E-07 |
| GASK1B  | ENSG00000164125 | protein_coding | 5729.10276 | 1.20403785 | 0.12473292 | 9.65292789 | 4.7772E-22 | 3.116E-21  |
| IL15    | ENSG00000164136 | protein_coding | 554.517986 | 1.01726785 | 0.08590457 | 11.8418364 | 2.372E-32  | 2.6322E-31 |
| SLC45A2 | ENSG00000164175 | protein_coding | 34.0866773 | 1.7198456  | 0.19487779 | 8.82525219 | 1.0921E-18 | 5.9178E-18 |
| EDIL3   | ENSG00000164176 | protein_coding | 7362.42026 | 1.14866536 | 0.15318372 | 7.49861275 | 6.4497E-14 | 2.5784E-13 |
| ZNF474  | ENSG00000164185 | protein_coding | 17.7362187 | 1.28928866 | 0.16231882 | 7.94294014 | 1.9744E-15 | 8.734E-15  |
| SCGB3A2 | ENSG00000164265 | protein_coding | 38.2438098 | 6.13059645 | 0.36440965 | 16.823365  | 1.6454E-63 | 6.2752E-62 |

|          |                 |                |            |            |            |            |            |            |
|----------|-----------------|----------------|------------|------------|------------|------------|------------|------------|
| ESM1     | ENSG00000164283 | protein_coding | 14157.6658 | 3.55911712 | 0.14284248 | 24.9163778 | 4.945E-137 | 2.337E-134 |
| ERAP2    | ENSG00000164308 | protein_coding | 5132.18383 | 1.06074378 | 0.18890093 | 5.6153444  | 1.9617E-08 | 5.1987E-08 |
| EGFLAM   | ENSG00000164318 | protein_coding | 801.57157  | 1.46308873 | 0.13926551 | 10.5057504 | 8.1274E-26 | 6.5146E-25 |
| FAM170A  | ENSG00000164334 | protein_coding | 1.83074538 | 1.90049277 | 0.31068197 | 6.11716472 | 9.5255E-10 | 2.8181E-09 |
| TLR3     | ENSG00000164342 | protein_coding | 5633.44541 | 1.50335251 | 0.11067321 | 13.5837078 | 5.0028E-42 | 8.4719E-41 |
| KLKB1    | ENSG00000164344 | protein_coding | 285.1239   | 1.43321953 | 0.17854172 | 8.02736485 | 9.9589E-16 | 4.4845E-15 |
| TERT     | ENSG00000164362 | protein_coding | 15.7756361 | 6.01161945 | 0.41998345 | 14.3139437 | 1.7906E-46 | 3.6694E-45 |
| CCDC127  | ENSG00000164366 | protein_coding | 2434.47396 | 1.04307083 | 0.06332285 | 16.4722655 | 5.8055E-61 | 2.0269E-59 |
| IL3      | ENSG00000164399 | protein_coding | 0.47799765 | 1.58997293 | 0.44332239 | 3.58649363 | 0.00033515 | 0.00059559 |
| CSF2     | ENSG00000164400 | protein_coding | 2.59691085 | 1.50505717 | 0.3038966  | 4.95253046 | 7.3255E-07 | 1.6979E-06 |
| SHROOM1  | ENSG00000164403 | protein_coding | 1038.54087 | 1.12739635 | 0.08982395 | 12.5511776 | 3.9164E-36 | 5.1963E-35 |
| CGAS     | ENSG00000164430 | protein_coding | 337.064832 | 1.38730083 | 0.08788887 | 15.7847167 | 3.9643E-56 | 1.1679E-54 |
| FABP7    | ENSG00000164434 | protein_coding | 11698.8842 | 7.44033575 | 0.32416086 | 22.9526036 | 1.388E-116 | 3.42E-114  |
| TXLNB    | ENSG00000164440 | protein_coding | 95.4872386 | 1.84986848 | 0.14672288 | 12.6079071 | 1.91E-36   | 2.5721E-35 |
| SAMD3    | ENSG00000164483 | protein_coding | 151.642709 | 2.32332188 | 0.12904272 | 18.0042851 | 1.8031E-72 | 9.4899E-71 |
| TMEM200A | ENSG00000164484 | protein_coding | 2761.44367 | 1.29025049 | 0.12966292 | 9.95080579 | 2.5015E-23 | 1.7435E-22 |
| IL22RA2  | ENSG00000164485 | protein_coding | 2.23525425 | 1.52055561 | 0.42587903 | 3.57039323 | 0.00035645 | 0.00063171 |
| H2AC1    | ENSG00000164508 | protein_coding | 1.81669209 | 1.47818427 | 0.3162064  | 4.6747449  | 2.9432E-06 | 6.4459E-06 |
| IL31RA   | ENSG00000164509 | protein_coding | 17.3086    | 1.36754341 | 0.21557833 | 6.34360337 | 2.2445E-10 | 6.9521E-10 |
| TBX20    | ENSG00000164532 | protein_coding | 1.37065099 | 2.46966366 | 0.4194213  | 5.88826477 | 3.9027E-09 | 1.0968E-08 |
| RPS14    | ENSG00000164587 | protein_coding | 46884.6583 | 1.07671582 | 0.0888408  | 12.1196103 | 8.3154E-34 | 9.906E-33  |
| GPR85    | ENSG00000164604 | protein_coding | 222.329145 | 1.49648508 | 0.13895821 | 10.7693177 | 4.8055E-27 | 4.1137E-26 |
| PTTG1    | ENSG00000164611 | protein_coding | 403.96782  | 2.36765899 | 0.1444087  | 16.3955427 | 2.0579E-60 | 7.0825E-59 |
| BMPER    | ENSG00000164619 | protein_coding | 96.2387806 | 1.02365952 | 0.18834297 | 5.43508206 | 5.4771E-08 | 1.4001E-07 |
| SLC29A4  | ENSG00000164638 | protein_coding | 2589.14979 | 2.18878747 | 0.13877636 | 15.7720481 | 4.8453E-56 | 1.4256E-54 |

|         |                 |                |            |            |            |            |            |            |
|---------|-----------------|----------------|------------|------------|------------|------------|------------|------------|
| CDCA7L  | ENSG00000164649 | protein_coding | 1135.31295 | 1.76621444 | 0.11184553 | 15.791552  | 3.5572E-56 | 1.0507E-54 |
| SP8     | ENSG00000164651 | protein_coding | 7.02737659 | 2.80820453 | 0.57348479 | 4.89673761 | 9.7441E-07 | 2.2314E-06 |
| SYTL3   | ENSG00000164674 | protein_coding | 777.749354 | 1.1931649  | 0.1079534  | 11.0525919 | 2.1298E-28 | 1.9491E-27 |
| HEY1    | ENSG00000164683 | protein_coding | 1140.95574 | 1.58094297 | 0.10937115 | 14.454844  | 2.3366E-47 | 4.9566E-46 |
| FABP5   | ENSG00000164687 | protein_coding | 569.664699 | 1.92008627 | 0.12935681 | 14.8433337 | 7.6841E-50 | 1.8064E-48 |
| TAGAP   | ENSG00000164691 | protein_coding | 684.060347 | 1.96858086 | 0.12420669 | 15.8492336 | 1.4231E-56 | 4.2581E-55 |
| COL1A2  | ENSG00000164692 | protein_coding | 49430.8232 | 1.73374601 | 0.17142143 | 10.1139398 | 4.7918E-24 | 3.4745E-23 |
| SLC13A4 | ENSG00000164707 | protein_coding | 98.3363583 | 1.2881933  | 0.15070223 | 8.54793809 | 1.2531E-17 | 6.3584E-17 |
| SLC35G3 | ENSG00000164729 | protein_coding | 3.67603396 | 3.68252603 | 0.43613859 | 8.44347672 | 3.0804E-17 | 1.5274E-16 |
| PHKG1   | ENSG00000164776 | protein_coding | 66.8173756 | 1.84736782 | 0.12319409 | 14.9955877 | 7.8465E-51 | 1.9204E-49 |
| KCNV1   | ENSG00000164794 | protein_coding | 85.4030525 | 1.67135911 | 0.25726713 | 6.49659012 | 8.2161E-11 | 2.6344E-10 |
| DEFA4   | ENSG00000164821 | protein_coding | 2.19759346 | 1.08172784 | 0.39806555 | 2.71746161 | 0.00657848 | 0.01009724 |
| MICALL2 | ENSG00000164877 | protein_coding | 1533.28898 | 2.04930689 | 0.12130289 | 16.8941308 | 4.9698E-64 | 1.9193E-62 |
| GBX1    | ENSG00000164900 | protein_coding | 0.70842092 | 1.20524134 | 0.33018971 | 3.65014811 | 0.00026209 | 0.00047149 |
| CTHRC1  | ENSG00000164932 | protein_coding | 1557.9007  | 3.1432709  | 0.20862891 | 15.0663244 | 2.6971E-51 | 6.712E-50  |
| DCSTAMP | ENSG00000164935 | protein_coding | 35.2196122 | 3.0029549  | 0.20110968 | 14.9319263 | 2.0428E-50 | 4.9286E-49 |
| FAM219A | ENSG00000164970 | protein_coding | 2025.01747 | 1.05838205 | 0.05395952 | 19.6143704 | 1.1657E-85 | 9.9697E-84 |
| DIRAS2  | ENSG00000165023 | protein_coding | 1627.89876 | 2.9845051  | 0.16146193 | 18.4842648 | 2.7644E-76 | 1.7033E-74 |
| ABCA1   | ENSG00000165029 | protein_coding | 6707.06812 | 1.55542838 | 0.10010678 | 15.5376926 | 1.928E-54  | 5.3695E-53 |
| ZMAT4   | ENSG00000165061 | protein_coding | 285.930145 | 3.47138843 | 0.31693144 | 10.953121  | 6.4197E-28 | 5.7421E-27 |
| NKX6-3  | ENSG00000165066 | protein_coding | 1.78630223 | 2.79812397 | 0.41721313 | 6.70670153 | 1.9907E-11 | 6.6762E-11 |
| PRSS37  | ENSG00000165076 | protein_coding | 8.78344381 | 2.3369864  | 0.21924685 | 10.6591562 | 1.5802E-26 | 1.3171E-25 |
| CPA6    | ENSG00000165078 | protein_coding | 55.5440381 | 2.51877061 | 0.16021032 | 15.7216503 | 1.0749E-55 | 3.1304E-54 |
| CFAP47  | ENSG00000165164 | protein_coding | 73.3694839 | 1.21621795 | 0.29334214 | 4.14607307 | 3.3823E-05 | 6.6908E-05 |
| CYBB    | ENSG00000165168 | protein_coding | 4890.47635 | 1.79780763 | 0.14856833 | 12.1008805 | 1.0448E-33 | 1.2364E-32 |

|          |                 |                |            |            |            |            |            |            |
|----------|-----------------|----------------|------------|------------|------------|------------|------------|------------|
| METTL27  | ENSG00000165171 | protein_coding | 496.847901 | 1.06016596 | 0.13987898 | 7.57916591 | 3.4778E-14 | 1.4129E-13 |
| OR1Q1    | ENSG00000165202 | protein_coding | 1.00300367 | 1.58855269 | 0.44623142 | 3.55993013 | 0.00037095 | 0.00065648 |
| OR1K1    | ENSG00000165204 | protein_coding | 1.15828985 | 1.96726518 | 0.38938519 | 5.05223415 | 4.3667E-07 | 1.0333E-06 |
| SLITRK5  | ENSG00000165300 | protein_coding | 394.747726 | 3.40236248 | 0.24645156 | 13.8054005 | 2.3645E-43 | 4.2591E-42 |
| MELK     | ENSG00000165304 | protein_coding | 212.514168 | 2.37125497 | 0.14543574 | 16.304486  | 9.1707E-60 | 3.0866E-58 |
| INTS6L   | ENSG00000165359 | protein_coding | 706.739765 | 1.75774039 | 0.09737554 | 18.0511494 | 7.7266E-73 | 4.1281E-71 |
| TSHR     | ENSG00000165409 | protein_coding | 69.3919781 | 2.37673957 | 0.16558065 | 14.3539693 | 1.0061E-46 | 2.0784E-45 |
| FOLR2    | ENSG00000165457 | protein_coding | 1316.39118 | 1.38423327 | 0.13864646 | 9.98390627 | 1.7927E-23 | 1.2596E-22 |
| PHOX2A   | ENSG00000165462 | protein_coding | 1.33682868 | 1.2190853  | 0.26359426 | 4.6248553  | 3.7486E-06 | 8.1279E-06 |
| MBL2     | ENSG00000165471 | protein_coding | 5.15790945 | 3.75726474 | 0.51122878 | 7.34947811 | 1.9898E-13 | 7.6839E-13 |
| GJB2     | ENSG00000165474 | protein_coding | 1772.98254 | 1.30284098 | 0.20081752 | 6.48768597 | 8.7165E-11 | 2.7895E-10 |
| SKA3     | ENSG00000165480 | protein_coding | 128.477804 | 2.07635329 | 0.12498877 | 16.6123192 | 5.6756E-62 | 2.0358E-60 |
| RPL10L   | ENSG00000165496 | protein_coding | 1.30273773 | 1.5394278  | 0.30028372 | 5.12657755 | 2.9506E-07 | 7.0863E-07 |
| DEPP1    | ENSG00000165507 | protein_coding | 20270.5745 | 2.24774533 | 0.11769082 | 19.0987313 | 2.587E-81  | 1.8914E-79 |
| MAGEC3   | ENSG00000165509 | protein_coding | 6.37827744 | 2.65350336 | 0.36849278 | 7.20096422 | 5.9788E-13 | 2.2321E-12 |
| CDX2     | ENSG00000165556 | protein_coding | 1.0700643  | 1.52026092 | 0.42822402 | 3.55015328 | 0.00038501 | 0.00068012 |
| SSX5     | ENSG00000165583 | protein_coding | 0.82980298 | 1.67223723 | 0.44608267 | 3.74871601 | 0.00017774 | 0.00032586 |
| SSX3     | ENSG00000165584 | protein_coding | 1.08720418 | 1.92475079 | 0.58248617 | 3.30437165 | 0.0009519  | 0.00161052 |
| OTX2     | ENSG00000165588 | protein_coding | 0.87019895 | 1.48935074 | 0.49272465 | 3.02268365 | 0.00250544 | 0.00404251 |
| SOHLH1   | ENSG00000165643 | protein_coding | 0.9165333  | 2.2956812  | 0.44782511 | 5.12628956 | 2.9551E-07 | 7.0961E-07 |
| SLC18A2  | ENSG00000165646 | protein_coding | 69.2607785 | 1.03782277 | 0.1515037  | 6.85014781 | 7.3774E-12 | 2.5531E-11 |
| CLEC1B   | ENSG00000165682 | protein_coding | 11.7003883 | 2.80482229 | 0.19592025 | 14.3161432 | 1.7349E-46 | 3.5567E-45 |
| OR4K2    | ENSG00000165762 | protein_coding | 0.71254873 | 2.07652949 | 0.55527911 | 3.73961395 | 0.0001843  | 0.00033741 |
| C12orf50 | ENSG00000165805 | protein_coding | 3.63974553 | 1.44797336 | 0.23576971 | 6.14147315 | 8.176E-10  | 2.4317E-09 |
| BTNL9    | ENSG00000165810 | protein_coding | 3338.23235 | 2.15816159 | 0.15829325 | 13.6339457 | 2.516E-42  | 4.3294E-41 |



|           |                 |                |            |            |            |            |            |            |
|-----------|-----------------|----------------|------------|------------|------------|------------|------------|------------|
| ERICH6B   | ENSG00000165837 | protein_coding | 15.8112312 | 1.69897282 | 0.15645416 | 10.8592371 | 1.8025E-27 | 1.573E-26  |
| E2F7      | ENSG00000165891 | protein_coding | 109.01547  | 2.41928402 | 0.16524056 | 14.6409818 | 1.5383E-48 | 3.4365E-47 |
| ARHGAP42  | ENSG00000165895 | protein_coding | 2551.91735 | 1.25029793 | 0.09988451 | 12.5174351 | 5.9941E-36 | 7.8868E-35 |
| AGBL2     | ENSG00000165923 | protein_coding | 154.464357 | 1.48047882 | 0.12726364 | 11.6331639 | 2.7954E-31 | 2.9499E-30 |
| SMCO2     | ENSG00000165935 | protein_coding | 10.1785122 | 1.4611147  | 0.17772913 | 8.22101968 | 2.0178E-16 | 9.4811E-16 |
| IFI27     | ENSG00000165949 | protein_coding | 7703.12838 | 1.47195281 | 0.13433655 | 10.9572026 | 6.1367E-28 | 5.4933E-27 |
| SERPINA12 | ENSG00000165953 | protein_coding | 9.73696874 | 4.06504815 | 0.43843533 | 9.27171674 | 1.8317E-20 | 1.0965E-19 |
| SLC6A5    | ENSG00000165970 | protein_coding | 1.64561315 | 1.425181   | 0.46059831 | 3.09419503 | 0.00197348 | 0.00321978 |
| TAF1D     | ENSG00000166012 | protein_coding | 3427.537   | 1.49208615 | 0.07774367 | 19.1923821 | 4.2854E-82 | 3.1995E-80 |
| PASD1     | ENSG00000166049 | protein_coding | 1.21175923 | 2.51100876 | 0.78854017 | 3.18437647 | 0.00145066 | 0.00240436 |
| TMCO5A    | ENSG00000166069 | protein_coding | 0.55253016 | 1.25788335 | 0.46901502 | 2.68196817 | 0.00731904 | 0.01116105 |
| GPR176    | ENSG00000166073 | protein_coding | 1814.09978 | 1.42014402 | 0.09894412 | 14.3529901 | 1.0204E-46 | 2.1071E-45 |
| GLB1L3    | ENSG00000166105 | protein_coding | 104.467466 | 1.30702076 | 0.32430201 | 4.03025791 | 5.5716E-05 | 0.00010766 |
| IKBIP     | ENSG00000166130 | protein_coding | 3083.68324 | 1.81279981 | 0.08917793 | 20.3278978 | 7.2858E-92 | 7.8832E-90 |
| PPP1R14D  | ENSG00000166143 | protein_coding | 381.407659 | 2.6506408  | 0.27041695 | 9.80205111 | 1.1032E-22 | 7.4427E-22 |
| C16orf78  | ENSG00000166152 | protein_coding | 1.79872322 | 1.68044765 | 0.29377269 | 5.72023099 | 1.0638E-08 | 2.8819E-08 |
| SPIC      | ENSG00000166211 | protein_coding | 9.69594399 | 3.82701128 | 0.31107905 | 12.3023756 | 8.7949E-35 | 1.0947E-33 |
| MYRFL     | ENSG00000166268 | protein_coding | 159.3067   | 1.93753905 | 0.19810011 | 9.78060569 | 1.3639E-22 | 9.1583E-22 |
| C2        | ENSG00000166278 | protein_coding | 2687.84038 | 2.17245636 | 0.19713451 | 11.0201726 | 3.0547E-28 | 2.7757E-27 |
| PLEKHF1   | ENSG00000166289 | protein_coding | 420.713785 | 1.01209435 | 0.11069206 | 9.14333265 | 6.0557E-20 | 3.5264E-19 |
| TMEM100   | ENSG00000166292 | protein_coding | 332.754576 | 1.25305089 | 0.20530863 | 6.10325498 | 1.0393E-09 | 3.0664E-09 |
| CCDC182   | ENSG00000166329 | protein_coding | 0.56630345 | 1.00524183 | 0.3558416  | 2.82496998 | 0.0047285  | 0.00738457 |
| NETO1     | ENSG00000166342 | protein_coding | 40.6719796 | 2.52831684 | 0.22591454 | 11.1914746 | 4.4891E-29 | 4.2632E-28 |
| MSS51     | ENSG00000166343 | protein_coding | 78.0480047 | 1.4570509  | 0.1326932  | 10.9805997 | 4.7377E-28 | 4.2626E-27 |
| PLD4      | ENSG00000166428 | protein_coding | 666.75062  | 2.25063798 | 0.1476471  | 15.2433601 | 1.8225E-52 | 4.7659E-51 |

|          |                 |                |            |            |            |            |            |            |
|----------|-----------------|----------------|------------|------------|------------|------------|------------|------------|
| ZMAT1    | ENSG00000166432 | protein_coding | 1647.16673 | 1.13550242 | 0.12418699 | 9.1434891  | 6.0469E-20 | 3.5217E-19 |
| TMEM130  | ENSG00000166448 | protein_coding | 2354.57627 | 1.32681396 | 0.26170023 | 5.06997627 | 3.9787E-07 | 9.4481E-07 |
| CCDC68   | ENSG00000166510 | protein_coding | 502.550219 | 1.01112821 | 0.14965015 | 6.75661342 | 1.4125E-11 | 4.7876E-11 |
| CLEC4E   | ENSG00000166523 | protein_coding | 288.730118 | 1.24979426 | 0.15587035 | 8.0181652  | 1.0734E-15 | 4.823E-15  |
| A2ML1    | ENSG00000166535 | protein_coding | 10.8317268 | 1.19541077 | 0.19447857 | 6.1467481  | 7.9088E-10 | 2.3557E-09 |
| SLC38A8  | ENSG00000166558 | protein_coding | 4.88769456 | 1.45151684 | 0.46012744 | 3.15459744 | 0.0016072  | 0.00265087 |
| GALR1    | ENSG00000166573 | protein_coding | 69.2426644 | 1.10792539 | 0.21623331 | 5.12374975 | 2.9952E-07 | 7.1889E-07 |
| RRAD     | ENSG00000166592 | protein_coding | 3928.45177 | 1.85872832 | 0.1668378  | 11.1409307 | 7.9286E-29 | 7.4403E-28 |
| TVP23A   | ENSG00000166676 | protein_coding | 107.846388 | 1.32570157 | 0.11906207 | 11.1345416 | 8.5182E-29 | 7.9788E-28 |
| TMPRSS5  | ENSG00000166682 | protein_coding | 29.8994043 | 1.82993906 | 0.15275229 | 11.9797816 | 4.5352E-33 | 5.2131E-32 |
| B2M      | ENSG00000166710 | protein_coding | 221039.862 | 1.32839165 | 0.07766326 | 17.104505  | 1.3736E-65 | 5.6122E-64 |
| HTR3A    | ENSG00000166736 | protein_coding | 11.6997968 | 1.27003127 | 0.31043108 | 4.09118601 | 4.2917E-05 | 8.4017E-05 |
| NNMT     | ENSG00000166741 | protein_coding | 41585.0759 | 3.90624263 | 0.16634215 | 23.4831805 | 6.059E-122 | 1.792E-119 |
| CATSPER2 | ENSG00000166762 | protein_coding | 200.048566 | 1.17498652 | 0.13583094 | 8.6503599  | 5.1337E-18 | 2.6694E-17 |
| YPEL4    | ENSG00000166793 | protein_coding | 138.841759 | 2.65096483 | 0.1328422  | 19.9557426 | 1.3362E-88 | 1.2682E-86 |
| PCLAF    | ENSG00000166803 | protein_coding | 304.354733 | 2.21498757 | 0.12535205 | 17.6701349 | 7.1226E-70 | 3.4154E-68 |
| MESP1    | ENSG00000166823 | protein_coding | 111.754601 | 1.2681933  | 0.12897783 | 9.83264531 | 8.1451E-23 | 5.5282E-22 |
| PLK1     | ENSG00000166851 | protein_coding | 310.212993 | 2.37603348 | 0.14520637 | 16.3631491 | 3.5052E-60 | 1.1973E-58 |
| CACNG2   | ENSG00000166862 | protein_coding | 1.88584953 | 3.03790536 | 0.4712435  | 6.4465724  | 1.1441E-10 | 3.6255E-10 |
| TAC3     | ENSG00000166863 | protein_coding | 3.98521426 | 1.42827645 | 0.30722504 | 4.6489584  | 3.3362E-06 | 7.2711E-06 |
| MYO1A    | ENSG00000166866 | protein_coding | 30.7116366 | 2.71619548 | 0.2074583  | 13.0927301 | 3.6235E-39 | 5.4801E-38 |
| C15orf48 | ENSG00000166920 | protein_coding | 314.59717  | 1.5334113  | 0.16134503 | 9.50392674 | 2.0212E-21 | 1.2759E-20 |
| SCG5     | ENSG00000166922 | protein_coding | 240.552182 | 1.61521446 | 0.21994509 | 7.34371684 | 2.0774E-13 | 8.0073E-13 |
| MS4A6E   | ENSG00000166926 | protein_coding | 3.27015044 | 2.5514107  | 0.30611139 | 8.33490946 | 7.7558E-17 | 3.7487E-16 |
| MS4A7    | ENSG00000166927 | protein_coding | 3454.38048 | 2.4108785  | 0.12060904 | 19.9892017 | 6.8381E-89 | 6.5854E-87 |

|           |                 |                |            |            |            |            |            |            |
|-----------|-----------------|----------------|------------|------------|------------|------------|------------|------------|
| MS4A14    | ENSG00000166928 | protein_coding | 228.014153 | 3.19372644 | 0.15368826 | 20.7805488 | 6.4912E-96 | 8.3821E-94 |
| EPB42     | ENSG00000166947 | protein_coding | 11.9635289 | 1.7025828  | 0.20413607 | 8.34043085 | 7.402E-17  | 3.5853E-16 |
| TGM6      | ENSG00000166948 | protein_coding | 0.71029717 | 2.0236613  | 0.53160419 | 3.80670683 | 0.00014083 | 0.00026093 |
| MS4A15    | ENSG00000166961 | protein_coding | 3.58263714 | 3.36014587 | 0.36460055 | 9.21596489 | 3.0849E-20 | 1.8195E-19 |
| MAPRE2    | ENSG00000166974 | protein_coding | 7077.95506 | 1.00152467 | 0.07762912 | 12.9014046 | 4.4197E-38 | 6.3832E-37 |
| EVA1C     | ENSG00000166979 | protein_coding | 1291.63036 | 1.14495542 | 0.10236212 | 11.1853434 | 4.8104E-29 | 4.5636E-28 |
| MEI1      | ENSG00000167077 | protein_coding | 158.09275  | 1.37277765 | 0.16100696 | 8.52620074 | 1.5123E-17 | 7.641E-17  |
| TTC16     | ENSG00000167094 | protein_coding | 63.3040294 | 1.64278389 | 0.15376935 | 10.683429  | 1.2169E-26 | 1.0202E-25 |
| SUN5      | ENSG00000167098 | protein_coding | 0.48537894 | 1.54451626 | 0.5382553  | 2.86948639 | 0.00411139 | 0.00647086 |
| SAMD14    | ENSG00000167100 | protein_coding | 467.994709 | 1.6045791  | 0.10036772 | 15.9870041 | 1.5742E-57 | 4.9058E-56 |
| TMEM92    | ENSG00000167105 | protein_coding | 472.124048 | 2.76977741 | 0.24621591 | 11.2493842 | 2.3321E-29 | 2.2483E-28 |
| ANKRD40CL | ENSG00000167117 | protein_coding | 5.64703755 | 1.30167032 | 0.26460836 | 4.91923354 | 8.6884E-07 | 2.0002E-06 |
| TBC1D21   | ENSG00000167139 | protein_coding | 0.80238767 | 1.5354253  | 0.40490556 | 3.79205784 | 0.0001494  | 0.0002761  |
| PRRX2     | ENSG00000167157 | protein_coding | 74.0017034 | 1.20382636 | 0.18952887 | 6.35167814 | 2.1298E-10 | 6.6083E-10 |
| UGT1A6    | ENSG00000167165 | protein_coding | 2160.92034 | 1.07144077 | 0.21880865 | 4.89670213 | 9.7458E-07 | 2.2317E-06 |
| C16orf92  | ENSG00000167194 | protein_coding | 0.64678832 | 2.00686106 | 0.46040006 | 4.35895044 | 1.3069E-05 | 2.6893E-05 |
| NOD2      | ENSG00000167207 | protein_coding | 272.277158 | 2.44460529 | 0.14145408 | 17.2819713 | 6.4312E-67 | 2.763E-65  |
| SNX20     | ENSG00000167208 | protein_coding | 564.702156 | 2.44163153 | 0.13793054 | 17.7018917 | 4.0546E-70 | 1.9606E-68 |
| DPEP2     | ENSG00000167261 | protein_coding | 325.8847   | 2.2665896  | 0.10502443 | 21.5815454 | 2.678E-103 | 4.597E-101 |
| ENGASE    | ENSG00000167280 | protein_coding | 1250.07621 | 1.04095567 | 0.10177127 | 10.2283848 | 1.4797E-24 | 1.1051E-23 |
| CD3D      | ENSG00000167286 | protein_coding | 583.070384 | 2.87454143 | 0.16994887 | 16.9141539 | 3.5386E-64 | 1.3794E-62 |
| TEPSIN    | ENSG00000167302 | protein_coding | 544.17019  | 1.13392588 | 0.09316297 | 12.1714228 | 4.4132E-34 | 5.3169E-33 |
| OR51E2    | ENSG00000167332 | protein_coding | 181.526089 | 2.19876203 | 0.16597611 | 13.2474612 | 4.6673E-40 | 7.2798E-39 |
| MMP26     | ENSG00000167346 | protein_coding | 2.5833436  | 1.86259035 | 0.53541763 | 3.47876173 | 0.00050374 | 0.00087888 |
| OR51I1    | ENSG00000167359 | protein_coding | 0.48988618 | 1.30713939 | 0.43302826 | 3.01860069 | 0.00253945 | 0.00409407 |

|          |                 |                |            |            |            |            |            |            |
|----------|-----------------|----------------|------------|------------|------------|------------|------------|------------|
| OR51Q1   | ENSG00000167360 | protein_coding | 0.48251496 | 1.26358681 | 0.52200822 | 2.42062629 | 0.0154938  | 0.02257345 |
| PRRT2    | ENSG00000167371 | protein_coding | 213.310286 | 2.4117288  | 0.15786328 | 15.2773263 | 1.0829E-52 | 2.858E-51  |
| VKORC1   | ENSG00000167397 | protein_coding | 3575.45178 | 1.15555342 | 0.0997593  | 11.5834153 | 5.0013E-31 | 5.1987E-30 |
| JSRP1    | ENSG00000167476 | protein_coding | 72.1829715 | 2.30410962 | 0.22477316 | 10.2508217 | 1.1734E-24 | 8.8225E-24 |
| CDT1     | ENSG00000167513 | protein_coding | 321.661348 | 2.27020742 | 0.12566639 | 18.0653507 | 5.9741E-73 | 3.2105E-71 |
| RPL13    | ENSG00000167526 | protein_coding | 56727.9402 | 1.13793425 | 0.09867386 | 11.532277  | 9.0712E-31 | 9.2965E-30 |
| CORO6    | ENSG00000167549 | protein_coding | 93.5475598 | 2.14481627 | 0.21049073 | 10.1895998 | 2.2067E-24 | 1.6339E-23 |
| RHEBL1   | ENSG00000167550 | protein_coding | 55.863262  | 1.90595068 | 0.10183655 | 18.7157816 | 3.6818E-78 | 2.4077E-76 |
| TUBA1A   | ENSG00000167552 | protein_coding | 9245.80805 | 1.015896   | 0.08853122 | 11.4750035 | 1.7617E-30 | 1.7859E-29 |
| AXL      | ENSG00000167601 | protein_coding | 6793.39721 | 1.58145116 | 0.10639997 | 14.8632669 | 5.7073E-50 | 1.3528E-48 |
| NFKBID   | ENSG00000167604 | protein_coding | 454.696429 | 2.16619778 | 0.14557785 | 14.8799962 | 4.4452E-50 | 1.0575E-48 |
| ANKRD33  | ENSG00000167612 | protein_coding | 9.54783443 | 3.20248355 | 0.29474749 | 10.8651767 | 1.689E-27  | 1.4761E-26 |
| LAIR1    | ENSG00000167613 | protein_coding | 2356.66228 | 2.63163836 | 0.12146169 | 21.6664072 | 4.257E-104 | 7.535E-102 |
| TTYH1    | ENSG00000167614 | protein_coding | 63.9488212 | 1.42178877 | 0.18449694 | 7.7062999  | 1.2952E-14 | 5.4137E-14 |
| LENG8    | ENSG00000167615 | protein_coding | 8187.17982 | 1.55495048 | 0.12968632 | 11.9900886 | 4.0048E-33 | 4.6138E-32 |
| LAIR2    | ENSG00000167618 | protein_coding | 30.1848859 | 3.48481895 | 0.23560982 | 14.7906354 | 1.6836E-49 | 3.8998E-48 |
| TMEM145  | ENSG00000167619 | protein_coding | 87.6190383 | 3.86458256 | 0.24416496 | 15.8277522 | 2.0025E-56 | 5.9608E-55 |
| KIR3DL1  | ENSG00000167633 | protein_coding | 16.1604984 | 2.19518062 | 0.17737536 | 12.3759051 | 3.5289E-35 | 4.47E-34   |
| NLRP7    | ENSG00000167634 | protein_coding | 11.5303701 | 2.13798585 | 0.24571489 | 8.70108394 | 3.2873E-18 | 1.7293E-17 |
| C19orf33 | ENSG00000167644 | protein_coding | 1667.38312 | 2.52935483 | 0.19727023 | 12.8217764 | 1.2383E-37 | 1.758E-36  |
| LY6D     | ENSG00000167656 | protein_coding | 5.01415531 | 1.50953548 | 0.41300913 | 3.6549688  | 0.00025721 | 0.00046312 |
| TMIGD2   | ENSG00000167664 | protein_coding | 30.3805884 | 2.17029737 | 0.1574359  | 13.7852759 | 3.1257E-43 | 5.5949E-42 |
| SEMA6B   | ENSG00000167680 | protein_coding | 1978.36782 | 1.62275589 | 0.11505953 | 14.10362   | 3.6078E-45 | 6.9848E-44 |
| TLCD3A   | ENSG00000167695 | protein_coding | 1602.49841 | 1.58301497 | 0.0988635  | 16.0121268 | 1.0515E-57 | 3.2993E-56 |
| KIFC2    | ENSG00000167702 | protein_coding | 639.141527 | 1.21174589 | 0.1309558  | 9.25309072 | 2.1809E-20 | 1.2991E-19 |

|          |                 |                |            |            |            |            |            |            |
|----------|-----------------|----------------|------------|------------|------------|------------|------------|------------|
| SERPINF2 | ENSG00000167711 | protein_coding | 12640.8462 | 1.00968154 | 0.17992082 | 5.61181033 | 2.0022E-08 | 5.3032E-08 |
| TRPV3    | ENSG00000167723 | protein_coding | 54.6756392 | 1.25654133 | 0.18783478 | 6.68960967 | 2.2377E-11 | 7.4835E-11 |
| KLK4     | ENSG00000167749 | protein_coding | 82.7714648 | 3.97225015 | 0.49363489 | 8.04693964 | 8.489E-16  | 3.837E-15  |
| KLK2     | ENSG00000167751 | protein_coding | 3.31516109 | 2.26486345 | 0.42536897 | 5.32446798 | 1.0125E-07 | 2.5293E-07 |
| KLK13    | ENSG00000167759 | protein_coding | 8.47134157 | 2.29603642 | 0.33993901 | 6.75425985 | 1.4357E-11 | 4.8642E-11 |
| ZNF83    | ENSG00000167766 | protein_coding | 4297.14046 | 1.46935523 | 0.10548788 | 13.9291383 | 4.2141E-44 | 7.8305E-43 |
| ANGPTL4  | ENSG00000167772 | protein_coding | 44219.1493 | 4.93447731 | 0.16903232 | 29.1925082 | 2.414E-187 | 4.611E-184 |
| TBX10    | ENSG00000167800 | protein_coding | 4.37012668 | 1.02750383 | 0.22394119 | 4.58827522 | 4.4692E-06 | 9.6275E-06 |
| CD300C   | ENSG00000167850 | protein_coding | 173.732138 | 2.28126592 | 0.13076876 | 17.4450369 | 3.7548E-68 | 1.6858E-66 |
| CD300A   | ENSG00000167851 | protein_coding | 1234.87955 | 2.97114479 | 0.12521022 | 23.7292513 | 1.8E-124   | 5.769E-122 |
| TMC8     | ENSG00000167895 | protein_coding | 1067.68596 | 2.51096368 | 0.12664094 | 19.8274253 | 1.7265E-87 | 1.5829E-85 |
| GSDMA    | ENSG00000167914 | protein_coding | 56.8898543 | 1.41067048 | 0.1954953  | 7.2158793  | 5.3587E-13 | 2.0061E-12 |
| NLRC3    | ENSG00000167984 | protein_coding | 617.581296 | 1.305935   | 0.08875503 | 14.7139264 | 5.2472E-49 | 1.1926E-47 |
| VWCE     | ENSG00000167992 | protein_coding | 824.50341  | 2.75465317 | 0.20165526 | 13.6602101 | 1.7548E-42 | 3.0401E-41 |
| BEST1    | ENSG00000167995 | protein_coding | 426.968125 | 1.88551601 | 0.11236167 | 16.7807757 | 3.374E-63  | 1.2678E-61 |
| ATG16L2  | ENSG00000168010 | protein_coding | 1512.53423 | 2.30737153 | 0.13000573 | 17.7482293 | 1.7787E-70 | 8.6929E-69 |
| CCDC88B  | ENSG00000168071 | protein_coding | 990.467387 | 2.57286631 | 0.12656848 | 20.3278598 | 7.2914E-92 | 7.8832E-90 |
| PBK      | ENSG00000168078 | protein_coding | 149.251596 | 2.09597767 | 0.14426966 | 14.5281941 | 8.031E-48  | 1.7316E-46 |
| OR1F1    | ENSG00000168124 | protein_coding | 0.67256075 | 1.35478781 | 0.57298638 | 2.36443285 | 0.0180577  | 0.02606206 |
| KCNJ4    | ENSG00000168135 | protein_coding | 43.6690876 | 1.69167326 | 0.21681657 | 7.8023248  | 6.0777E-15 | 2.5999E-14 |
| H3-4     | ENSG00000168148 | protein_coding | 1.15258741 | 2.0153664  | 0.30692706 | 6.56627149 | 5.1591E-11 | 1.6787E-10 |
| DDIT4    | ENSG00000168209 | protein_coding | 15612.5539 | 2.15873495 | 0.11831152 | 18.2461946 | 2.2183E-74 | 1.2585E-72 |
| PTGDR    | ENSG00000168229 | protein_coding | 92.8509535 | 2.20058664 | 0.1325132  | 16.6065466 | 6.2489E-62 | 2.2379E-60 |
| KCNV2    | ENSG00000168263 | protein_coding | 8.73237131 | 2.40040809 | 0.20312853 | 11.8171886 | 3.1815E-32 | 3.5118E-31 |
| PTF1A    | ENSG00000168267 | protein_coding | 0.96542752 | 2.16301602 | 0.31740949 | 6.81459142 | 9.4532E-12 | 3.2426E-11 |

|         |                 |                |            |            |            |            |            |            |
|---------|-----------------|----------------|------------|------------|------------|------------|------------|------------|
| CX3CR1  | ENSG00000168329 | protein_coding | 1263.42137 | 1.64980129 | 0.16481621 | 10.0099457 | 1.3783E-23 | 9.7488E-23 |
| PPDPFL  | ENSG00000168333 | protein_coding | 479.591404 | 8.02292934 | 0.43041912 | 18.6398071 | 1.5279E-77 | 9.8142E-76 |
| XIRP1   | ENSG00000168334 | protein_coding | 23.5448127 | 1.46759088 | 0.21826785 | 6.72380679 | 1.7704E-11 | 5.9542E-11 |
| INSM2   | ENSG00000168348 | protein_coding | 1.14884334 | 2.22709339 | 0.35955606 | 6.19400869 | 5.8653E-10 | 1.7647E-09 |
| TAP1    | ENSG00000168394 | protein_coding | 9013.59643 | 1.9201321  | 0.08668038 | 22.151865  | 1.001E-108 | 2.044E-106 |
| MLKL    | ENSG00000168404 | protein_coding | 1355.65695 | 1.91649597 | 0.0751714  | 25.4950133 | 2.239E-143 | 1.18E-140  |
| KCNG4   | ENSG00000168418 | protein_coding | 1.46244503 | 1.42864999 | 0.38706449 | 3.69098697 | 0.00022339 | 0.00040506 |
| RHOH    | ENSG00000168421 | protein_coding | 379.712818 | 2.21044296 | 0.14241378 | 15.521272  | 2.4906E-54 | 6.9029E-53 |
| REEP4   | ENSG00000168476 | protein_coding | 830.75063  | 1.13940048 | 0.08084751 | 14.0932036 | 4.1815E-45 | 8.0676E-44 |
| BMP1    | ENSG00000168487 | protein_coding | 3094.23166 | 1.85385505 | 0.10203891 | 18.1681193 | 9.2308E-74 | 5.1229E-72 |
| MTCL1   | ENSG00000168502 | protein_coding | 2075.41418 | 2.23586468 | 0.12240326 | 18.2663825 | 1.5328E-74 | 8.7613E-73 |
| GBX2    | ENSG00000168505 | protein_coding | 6.5184358  | 3.33272418 | 0.28813445 | 11.5665592 | 6.0875E-31 | 6.2964E-30 |
| MYL1    | ENSG00000168530 | protein_coding | 0.5183328  | 1.17307909 | 0.44458093 | 2.63861764 | 0.00832448 | 0.01260496 |
| COL3A1  | ENSG00000168542 | protein_coding | 41217.1953 | 1.30899328 | 0.1663478  | 7.86901463 | 3.5745E-15 | 1.552E-14  |
| CRYGA   | ENSG00000168582 | protein_coding | 0.47665311 | 1.50369105 | 0.6485574  | 2.31851654 | 0.02042127 | 0.02925593 |
| ADAM29  | ENSG00000168594 | protein_coding | 4.84112668 | 2.34932826 | 0.28228754 | 8.32246542 | 8.6152E-17 | 4.1532E-16 |
| ADAM18  | ENSG00000168619 | protein_coding | 109.605142 | 8.20773328 | 0.39565664 | 20.7445863 | 1.372E-95  | 1.7326E-93 |
| WFDC13  | ENSG00000168634 | protein_coding | 3.70391627 | 2.62562847 | 0.3459656  | 7.58927603 | 3.217E-14  | 1.3096E-13 |
| KCTD19  | ENSG00000168676 | protein_coding | 31.4499467 | 2.4392551  | 0.18443361 | 13.2256541 | 6.2392E-40 | 9.6756E-39 |
| IL7R    | ENSG00000168685 | protein_coding | 1674.74269 | 1.14496593 | 0.16373022 | 6.99300311 | 2.6906E-12 | 9.6045E-12 |
| FAM178B | ENSG00000168754 | protein_coding | 12.7570351 | 1.0044041  | 0.17758956 | 5.65576091 | 1.5516E-08 | 4.1509E-08 |
| SHOX2   | ENSG00000168779 | protein_coding | 23.3939944 | 2.36215356 | 0.22189526 | 10.645354  | 1.8329E-26 | 1.524E-25  |
| OR13J1  | ENSG00000168828 | protein_coding | 2.00740588 | 1.52199631 | 0.28318105 | 5.37464036 | 7.6736E-08 | 1.9394E-07 |
| VAMP5   | ENSG00000168899 | protein_coding | 3024.39698 | 1.20408705 | 0.09506356 | 12.6661259 | 9.1104E-37 | 1.247E-35  |
| BTNL3   | ENSG00000168903 | protein_coding | 7.97359129 | 1.39451177 | 0.22252574 | 6.26674369 | 3.6868E-10 | 1.1263E-09 |



|               |                 |                |            |            |            |            |            |            |
|---------------|-----------------|----------------|------------|------------|------------|------------|------------|------------|
| SLC35G2       | ENSG00000168917 | protein_coding | 619.435319 | 1.40939517 | 0.08809332 | 15.9988882 | 1.3008E-57 | 4.0591E-56 |
| INPP5D        | ENSG00000168918 | protein_coding | 2919.82773 | 1.67916109 | 0.08807573 | 19.0649699 | 4.9356E-81 | 3.5687E-79 |
| LGALS9        | ENSG00000168961 | protein_coding | 2880.61776 | 2.17753355 | 0.10167356 | 21.4169099 | 9.295E-102 | 1.49E-99   |
| JMJD7-PLA2G4B | ENSG00000168970 | protein_coding | 212.689784 | 1.5304464  | 0.14070385 | 10.8770753 | 1.4824E-27 | 1.2996E-26 |
| CPLX1         | ENSG00000168993 | protein_coding | 222.026713 | 1.01371598 | 0.14576006 | 6.95468985 | 3.5334E-12 | 1.2495E-11 |
| PXDC1         | ENSG00000168994 | protein_coding | 3587.29612 | 1.1609111  | 0.07983092 | 14.5421241 | 6.5527E-48 | 1.4209E-46 |
| SIGLEC7       | ENSG00000168995 | protein_coding | 183.67627  | 2.11125206 | 0.13774559 | 15.3271841 | 5.0334E-53 | 1.3384E-51 |
| NTSR2         | ENSG00000169006 | protein_coding | 1.02741865 | 2.20458716 | 0.50170955 | 4.39415024 | 1.1121E-05 | 2.3046E-05 |
| VCX3A         | ENSG00000169059 | protein_coding | 0.98925217 | 1.3691795  | 0.40123213 | 3.41243731 | 0.00064385 | 0.00110986 |
| VXN           | ENSG00000169085 | protein_coding | 301.267827 | 1.55107739 | 0.16155964 | 9.60064872 | 7.9443E-22 | 5.1263E-21 |
| IL13          | ENSG00000169194 | protein_coding | 3.49077041 | 1.81380651 | 0.27264461 | 6.65264025 | 2.8788E-11 | 9.5497E-11 |
| NPIPB12       | ENSG00000169203 | protein_coding | 20.5267062 | 2.11784186 | 0.18068567 | 11.7211389 | 9.9328E-32 | 1.0701E-30 |
| RGS14         | ENSG00000169220 | protein_coding | 2455.35217 | 1.35186102 | 0.10695272 | 12.6398007 | 1.2738E-36 | 1.7301E-35 |
| RAB24         | ENSG00000169228 | protein_coding | 792.542131 | 1.64853791 | 0.10252705 | 16.0790528 | 3.5781E-58 | 1.1414E-56 |
| THBS3         | ENSG00000169231 | protein_coding | 1655.87288 | 1.22710087 | 0.09349255 | 13.1251193 | 2.3641E-39 | 3.5992E-38 |
| EFNA1         | ENSG00000169242 | protein_coding | 6887.2879  | 1.21433479 | 0.09798328 | 12.3932859 | 2.8416E-35 | 3.6274E-34 |
| CXCL10        | ENSG00000169245 | protein_coding | 2100.5488  | 3.39225445 | 0.18315671 | 18.5210491 | 1.3969E-76 | 8.6885E-75 |
| NPIPB3        | ENSG00000169246 | protein_coding | 109.907421 | 2.14756376 | 0.15200076 | 14.1286387 | 2.5299E-45 | 4.9287E-44 |
| CXCL11        | ENSG00000169248 | protein_coding | 490.95264  | 3.50377719 | 0.19536375 | 17.9346335 | 6.328E-72  | 3.2667E-70 |
| GPRIN1        | ENSG00000169258 | protein_coding | 305.294969 | 2.17066532 | 0.12947049 | 16.7657155 | 4.3475E-63 | 1.6242E-61 |
| KCNAB1        | ENSG00000169282 | protein_coding | 872.204122 | 1.44670904 | 0.12884279 | 11.228483  | 2.9551E-29 | 2.8381E-28 |
| NR0B1         | ENSG00000169297 | protein_coding | 8.2454059  | 2.27398681 | 0.57169013 | 3.97765622 | 6.9598E-05 | 0.00013306 |
| P2RY12        | ENSG00000169313 | protein_coding | 156.642292 | 1.70668443 | 0.16380776 | 10.4188253 | 2.0345E-25 | 1.5948E-24 |
| RNASE2        | ENSG00000169385 | protein_coding | 80.7027662 | 2.43055374 | 0.1763436  | 13.7830559 | 3.2233E-43 | 5.7652E-42 |
| RNASE3        | ENSG00000169397 | protein_coding | 7.1290716  | 2.51162737 | 0.22724401 | 11.052557  | 2.1306E-28 | 1.9494E-27 |

|         |                 |                |            |            |            |            |            |            |
|---------|-----------------|----------------|------------|------------|------------|------------|------------|------------|
| PTAFR   | ENSG00000169403 | protein_coding | 1337.12609 | 1.41607041 | 0.12664813 | 11.1811394 | 5.0438E-29 | 4.7811E-28 |
| RNASE6  | ENSG00000169413 | protein_coding | 1139.87141 | 1.52179594 | 0.11525021 | 13.2042789 | 8.289E-40  | 1.2802E-38 |
| KCNK9   | ENSG00000169427 | protein_coding | 250.430655 | 4.55094984 | 0.22408863 | 20.3087049 | 1.0771E-91 | 1.1509E-89 |
| SCN9A   | ENSG00000169432 | protein_coding | 937.788823 | 1.32293002 | 0.17835395 | 7.41744184 | 1.194E-13  | 4.6875E-13 |
| RASSF6  | ENSG00000169435 | protein_coding | 2748.42502 | 1.23756716 | 0.11901961 | 10.398011  | 2.5316E-25 | 1.9754E-24 |
| CD52    | ENSG00000169442 | protein_coding | 1308.67504 | 2.09564527 | 0.13749615 | 15.2414838 | 1.8756E-52 | 4.8992E-51 |
| SPRR1B  | ENSG00000169469 | protein_coding | 1.75575343 | 1.95353941 | 0.64078651 | 3.04865877 | 0.00229865 | 0.00372289 |
| HTRA4   | ENSG00000169495 | protein_coding | 83.025609  | 4.838843   | 0.21653432 | 22.3467721 | 1.298E-110 | 2.833E-108 |
| GPR183  | ENSG00000169508 | protein_coding | 864.34685  | 1.45070122 | 0.13532318 | 10.7202716 | 8.1763E-27 | 6.9153E-26 |
| ZNF280A | ENSG00000169548 | protein_coding | 1.75730869 | 2.5723312  | 0.52021649 | 4.94473215 | 7.6249E-07 | 1.7646E-06 |
| CT55    | ENSG00000169551 | protein_coding | 1.74393825 | 1.56687535 | 0.26393412 | 5.93661533 | 2.9097E-09 | 8.2682E-09 |
| CLIC3   | ENSG00000169583 | protein_coding | 105.099599 | 1.62107373 | 0.16365778 | 9.90526543 | 3.9492E-23 | 2.7232E-22 |
| INO80E  | ENSG00000169592 | protein_coding | 2613.38294 | 1.21271968 | 0.07116291 | 17.0414573 | 4.0452E-65 | 1.6295E-63 |
| GKN1    | ENSG00000169605 | protein_coding | 0.99808416 | 1.97990766 | 0.47374786 | 4.17924352 | 2.9248E-05 | 5.8205E-05 |
| CKAP2L  | ENSG00000169607 | protein_coding | 167.950609 | 2.24524936 | 0.14263153 | 15.7416055 | 7.8428E-56 | 2.2914E-54 |
| PROKR1  | ENSG00000169618 | protein_coding | 4.66460281 | 1.06069202 | 0.19411662 | 5.46420004 | 4.65E-08   | 1.1947E-07 |
| BUB1    | ENSG00000169679 | protein_coding | 337.527436 | 2.39789535 | 0.14602216 | 16.4214482 | 1.3432E-60 | 4.6507E-59 |
| CHRNA5  | ENSG00000169684 | protein_coding | 36.105232  | 1.12112557 | 0.15769484 | 7.10946275 | 1.165E-12  | 4.2695E-12 |
| GP9     | ENSG00000169704 | protein_coding | 7.37589696 | 2.31827372 | 0.22226629 | 10.4301633 | 1.8058E-25 | 1.4201E-24 |
| NLGN1   | ENSG00000169760 | protein_coding | 1899.86342 | 2.01060012 | 0.13634986 | 14.7458908 | 3.2698E-49 | 7.502E-48  |
| LINGO1  | ENSG00000169783 | protein_coding | 1043.66485 | 1.944217   | 0.13368658 | 14.5430975 | 6.4602E-48 | 1.4022E-46 |
| P2RY1   | ENSG00000169860 | protein_coding | 845.958762 | 2.41913039 | 0.11793816 | 20.5118552 | 1.6873E-93 | 1.9833E-91 |
| MUC17   | ENSG00000169876 | protein_coding | 24.8678348 | 6.61952695 | 0.46900647 | 14.1139353 | 3.1169E-45 | 6.0517E-44 |
| AHSP    | ENSG00000169877 | protein_coding | 9.01682214 | 2.08944793 | 0.3215703  | 6.49763974 | 8.159E-11  | 2.6166E-10 |
| WNT10B  | ENSG00000169884 | protein_coding | 22.4251164 | 2.6212014  | 0.21631229 | 12.1176718 | 8.5144E-34 | 1.013E-32  |

|          |                 |                |            |            |            |            |            |            |
|----------|-----------------|----------------|------------|------------|------------|------------|------------|------------|
| CALML6   | ENSG00000169885 | protein_coding | 8.42457136 | 2.11484589 | 0.24899697 | 8.49346018 | 2.0057E-17 | 1.0057E-16 |
| MUC3A    | ENSG00000169894 | protein_coding | 1250.64362 | 3.41486166 | 0.18092377 | 18.8745879 | 1.8456E-79 | 1.2552E-77 |
| ITGAM    | ENSG00000169896 | protein_coding | 1438.61667 | 1.99039765 | 0.12546047 | 15.8647387 | 1.1118E-56 | 3.3398E-55 |
| PYDC1    | ENSG00000169900 | protein_coding | 5.88481687 | 1.86145319 | 0.34775673 | 5.35274527 | 8.663E-08  | 2.1777E-07 |
| S100G    | ENSG00000169906 | protein_coding | 8.46374011 | 5.54997017 | 0.61465101 | 9.02946556 | 1.7251E-19 | 9.7825E-19 |
| KCNAB3   | ENSG00000170049 | protein_coding | 90.07288   | 1.39207744 | 0.15664902 | 8.88660181 | 6.3006E-19 | 3.4627E-18 |
| SERPINA9 | ENSG00000170054 | protein_coding | 4.40330008 | 3.51956546 | 0.41529355 | 8.47488583 | 2.3531E-17 | 1.1757E-16 |
| FAM153A  | ENSG00000170074 | protein_coding | 263.097152 | 3.24336365 | 0.25183829 | 12.8787548 | 5.9284E-38 | 8.5113E-37 |
| SPDYE5   | ENSG00000170092 | protein_coding | 35.3293186 | 1.63506599 | 0.15226932 | 10.737987  | 6.75E-27   | 5.7365E-26 |
| FOXD4    | ENSG00000170122 | protein_coding | 40.7154418 | 1.11783785 | 0.13981283 | 7.99524535 | 1.2932E-15 | 5.789E-15  |
| GPR25    | ENSG00000170128 | protein_coding | 4.52268009 | 2.15156904 | 0.23877732 | 9.01077653 | 2.046E-19  | 1.1554E-18 |
| CCDC144A | ENSG00000170160 | protein_coding | 63.5264531 | 1.79077349 | 0.28110715 | 6.37043017 | 1.885E-10  | 5.875E-10  |
| HOXD12   | ENSG00000170178 | protein_coding | 1.03780615 | 1.70141281 | 0.36607254 | 4.64774777 | 3.3558E-06 | 7.3121E-06 |
| ANKK1    | ENSG00000170209 | protein_coding | 39.1900981 | 2.18302082 | 0.16211751 | 13.4656698 | 2.4905E-41 | 4.1097E-40 |
| ADRA1B   | ENSG00000170214 | protein_coding | 535.130808 | 1.39822856 | 0.12496447 | 11.1890089 | 4.6156E-29 | 4.3816E-28 |
| FABP6    | ENSG00000170231 | protein_coding | 1240.27604 | 6.42376638 | 0.22043418 | 29.1414268 | 1.073E-186 | 1.967E-183 |
| HSPB2    | ENSG00000170276 | protein_coding | 317.423467 | 1.27239552 | 0.13341407 | 9.53719108 | 1.4675E-21 | 9.3331E-21 |
| C7orf33  | ENSG00000170279 | protein_coding | 1.1457065  | 2.79173417 | 0.44280937 | 6.30459604 | 2.8895E-10 | 8.8885E-10 |
| SLN      | ENSG00000170290 | protein_coding | 50.1954092 | 3.11388706 | 0.37829244 | 8.23142829 | 1.8499E-16 | 8.7174E-16 |
| LGALS9B  | ENSG00000170298 | protein_coding | 3.14593369 | 2.08093502 | 0.23286749 | 8.93613381 | 4.0302E-19 | 2.2356E-18 |
| CST2     | ENSG00000170369 | protein_coding | 13.4581774 | 2.43396804 | 0.30750749 | 7.91515051 | 2.4695E-15 | 1.0845E-14 |
| CST1     | ENSG00000170373 | protein_coding | 8.42654011 | 2.55831888 | 0.38285782 | 6.68216434 | 2.3544E-11 | 7.8611E-11 |
| SP7      | ENSG00000170374 | protein_coding | 2.84638669 | 2.04560276 | 0.31489196 | 6.49620513 | 8.2371E-11 | 2.6409E-10 |
| TCAF2    | ENSG00000170379 | protein_coding | 678.065447 | 1.66334505 | 0.09169438 | 18.1400977 | 1.5376E-73 | 8.4615E-72 |
| KRT78    | ENSG00000170423 | protein_coding | 3.58629678 | 3.19882475 | 0.41170726 | 7.76965836 | 7.8698E-15 | 3.3388E-14 |

|          |                 |                |            |            |            |            |            |            |
|----------|-----------------|----------------|------------|------------|------------|------------|------------|------------|
| SDR9C7   | ENSG00000170426 | protein_coding | 1.70470885 | 1.89754401 | 0.32518806 | 5.8352204  | 5.372E-09  | 1.4927E-08 |
| KRT86    | ENSG00000170442 | protein_coding | 88.5620453 | 1.5161163  | 0.15903487 | 9.5332318  | 1.5246E-21 | 9.6881E-21 |
| KRT75    | ENSG00000170454 | protein_coding | 1.67340052 | 2.83260438 | 0.55233442 | 5.12842271 | 2.9218E-07 | 7.0202E-07 |
| CD14     | ENSG00000170458 | protein_coding | 6377.40845 | 1.74406345 | 0.1223919  | 14.2498276 | 4.4939E-46 | 9.0234E-45 |
| KRT6C    | ENSG00000170465 | protein_coding | 1.88889497 | 1.9082844  | 0.64047534 | 2.97948145 | 0.00288737 | 0.00462975 |
| MZB1     | ENSG00000170476 | protein_coding | 426.997078 | 1.58334066 | 0.25760218 | 6.14645677 | 7.9233E-10 | 2.3599E-09 |
| KRT4     | ENSG00000170477 | protein_coding | 8.02836464 | 2.37046483 | 0.40543983 | 5.84665018 | 5.0157E-09 | 1.3979E-08 |
| KRT74    | ENSG00000170484 | protein_coding | 0.49074689 | 1.28473595 | 0.51173063 | 2.51057074 | 0.01205362 | 0.01782764 |
| KRT72    | ENSG00000170486 | protein_coding | 5.4235044  | 3.87157403 | 0.33311328 | 11.6223948 | 3.1712E-31 | 3.3334E-30 |
| KISS1    | ENSG00000170498 | protein_coding | 16.2260525 | 1.21882561 | 0.25447549 | 4.78955989 | 1.6715E-06 | 3.7431E-06 |
| HSD17B13 | ENSG00000170509 | protein_coding | 58.7335627 | 1.30747513 | 0.21652229 | 6.03852442 | 1.5553E-09 | 4.5199E-09 |
| SERPINB9 | ENSG00000170542 | protein_coding | 1954.27165 | 1.34651939 | 0.08458224 | 15.9196467 | 4.6298E-57 | 1.4121E-55 |
| CDH2     | ENSG00000170558 | protein_coding | 5615.10887 | 1.20492434 | 0.1272031  | 9.47244514 | 2.7337E-21 | 1.7134E-20 |
| EMB      | ENSG00000170571 | protein_coding | 1339.49994 | 1.55533496 | 0.12030279 | 12.9285028 | 3.1081E-38 | 4.5131E-37 |
| GTSF1    | ENSG00000170627 | protein_coding | 28.6044807 | 1.18527658 | 0.18284272 | 6.48249272 | 9.0219E-11 | 2.8833E-10 |
| CAVIN4   | ENSG00000170681 | protein_coding | 25.4492297 | 1.05051454 | 0.13915638 | 7.54916537 | 4.3806E-14 | 1.7691E-13 |
| ZNF296   | ENSG00000170684 | protein_coding | 89.8567145 | 1.56727645 | 0.13283072 | 11.799051  | 3.9474E-32 | 4.3311E-31 |
| TTLL6    | ENSG00000170703 | protein_coding | 287.712072 | 1.00479182 | 0.20664139 | 4.86249066 | 1.1592E-06 | 2.6355E-06 |
| GPR37    | ENSG00000170775 | protein_coding | 273.868728 | 1.70889014 | 0.23908046 | 7.14776156 | 8.8204E-13 | 3.2589E-12 |
| OR10A4   | ENSG00000170782 | protein_coding | 0.48950937 | 1.20662653 | 0.53143458 | 2.27050812 | 0.02317677 | 0.03293999 |
| OR10A2   | ENSG00000170790 | protein_coding | 1.05060609 | 2.06500831 | 0.43737681 | 4.72134837 | 2.3429E-06 | 5.1751E-06 |
| HTRA3    | ENSG00000170801 | protein_coding | 581.178473 | 1.07936479 | 0.15934829 | 6.77362    | 1.256E-11  | 4.2715E-11 |
| LMOD2    | ENSG00000170807 | protein_coding | 2.33655992 | 1.30180798 | 0.24985515 | 5.21025063 | 1.8859E-07 | 4.6077E-07 |
| PSG6     | ENSG00000170848 | protein_coding | 1.47140752 | 3.09449432 | 0.52585226 | 5.88472187 | 3.9872E-09 | 1.1196E-08 |
| PLA2G1B  | ENSG00000170890 | protein_coding | 22.9567424 | 1.15126842 | 0.19351157 | 5.94935179 | 2.6921E-09 | 7.6703E-09 |

|         |                 |                |            |            |            |            |            |            |
|---------|-----------------|----------------|------------|------------|------------|------------|------------|------------|
| CYTL1   | ENSG00000170891 | protein_coding | 103.820618 | 1.6290709  | 0.15831891 | 10.2898061 | 7.8334E-25 | 5.9275E-24 |
| OSCAR   | ENSG00000170909 | protein_coding | 278.239036 | 2.57112399 | 0.12429068 | 20.6863784 | 4.5945E-95 | 5.7233E-93 |
| TEX13B  | ENSG00000170925 | protein_coding | 1.13743986 | 2.61221548 | 0.39381908 | 6.63303432 | 3.2886E-11 | 1.0872E-10 |
| MBD3L1  | ENSG00000170948 | protein_coding | 0.52102336 | 1.39180084 | 0.4838982  | 2.87622654 | 0.00402461 | 0.0063432  |
| PGK2    | ENSG00000170950 | protein_coding | 0.59605149 | 1.03860009 | 0.36461558 | 2.84847973 | 0.00439287 | 0.00688998 |
| CAVIN3  | ENSG00000170955 | protein_coding | 2837.47906 | 2.29532277 | 0.12409787 | 18.4960694 | 2.2209E-76 | 1.3721E-74 |
| CEACAM3 | ENSG00000170956 | protein_coding | 13.9122726 | 1.64940774 | 0.17033177 | 9.68350048 | 3.5437E-22 | 2.3273E-21 |
| PDGFD   | ENSG00000170962 | protein_coding | 5274.16896 | 1.83247575 | 0.12605239 | 14.5374143 | 7.0194E-48 | 1.52E-46   |
| PLAC1   | ENSG00000170965 | protein_coding | 3.77470618 | 1.3695466  | 0.25316713 | 5.40965416 | 6.3147E-08 | 1.6061E-07 |
| DDI1    | ENSG00000170967 | protein_coding | 1.53321541 | 2.34204247 | 0.34897838 | 6.71113918 | 1.9311E-11 | 6.4819E-11 |
| FPR2    | ENSG00000171049 | protein_coding | 74.546852  | 1.17614251 | 0.16811363 | 6.99611631 | 2.6316E-12 | 9.4031E-12 |
| FPR1    | ENSG00000171051 | protein_coding | 755.020642 | 1.55010576 | 0.15450179 | 10.0329307 | 1.0923E-23 | 7.7664E-23 |
| C8orf74 | ENSG00000171060 | protein_coding | 2.03011793 | 2.91205848 | 0.42043202 | 6.92634799 | 4.3184E-12 | 1.518E-11  |
| ALK     | ENSG00000171094 | protein_coding | 23.2652358 | 2.26088853 | 0.19381115 | 11.6654202 | 1.9146E-31 | 2.034E-30  |
| OBP2B   | ENSG00000171102 | protein_coding | 2.73908429 | 3.36698463 | 0.30463438 | 11.0525432 | 2.1309E-28 | 1.9494E-27 |
| INSR    | ENSG00000171105 | protein_coding | 21020.9174 | 1.25228538 | 0.09310188 | 13.4506996 | 3.0497E-41 | 5.0091E-40 |
| RLN3    | ENSG00000171136 | protein_coding | 1.09618    | 1.29257034 | 0.36548738 | 3.53656623 | 0.00040536 | 0.00071449 |
| ZNF692  | ENSG00000171163 | protein_coding | 1108.12332 | 1.81148685 | 0.12489935 | 14.5035734 | 1.15E-47   | 2.4704E-46 |
| GRIK1   | ENSG00000171189 | protein_coding | 25.5940566 | 1.15236481 | 0.18025245 | 6.39306055 | 1.626E-10  | 5.0955E-10 |
| NETO2   | ENSG00000171208 | protein_coding | 3886.80023 | 3.29044621 | 0.11733379 | 28.0434669 | 4.799E-173 | 6.285E-170 |
| CSN3    | ENSG00000171209 | protein_coding | 0.66173568 | 1.87258429 | 0.65029594 | 2.87958786 | 0.00398195 | 0.00627878 |
| LRG1    | ENSG00000171236 | protein_coding | 969.190761 | 1.21256744 | 0.21353099 | 5.6786486  | 1.3576E-08 | 3.6482E-08 |
| KCNK3   | ENSG00000171303 | protein_coding | 4940.27846 | 2.15498022 | 0.20087428 | 10.7280045 | 7.5203E-27 | 6.3722E-26 |
| CHST11  | ENSG00000171310 | protein_coding | 2469.85325 | 1.77284321 | 0.09954355 | 17.809725  | 5.9401E-71 | 2.9792E-69 |
| ESCO2   | ENSG00000171320 | protein_coding | 88.6569622 | 1.88660807 | 0.12858499 | 14.6720702 | 9.733E-49  | 2.1903E-47 |

|         |                 |                |            |            |            |            |            |            |
|---------|-----------------|----------------|------------|------------|------------|------------|------------|------------|
| KRT15   | ENSG00000171346 | protein_coding | 53.7323921 | 1.95333905 | 0.30082407 | 6.49329363 | 8.398E-11  | 2.6906E-10 |
| APLN    | ENSG00000171388 | protein_coding | 5653.5507  | 2.44741373 | 0.13279142 | 18.4305115 | 7.4773E-76 | 4.4923E-74 |
| KRT9    | ENSG00000171403 | protein_coding | 0.65322842 | 1.41080456 | 0.46746565 | 3.01798549 | 0.00254461 | 0.00410225 |
| ZNF581  | ENSG00000171425 | protein_coding | 1133.26203 | 1.06665889 | 0.08456212 | 12.6139094 | 1.7699E-36 | 2.3919E-35 |
| KRT20   | ENSG00000171431 | protein_coding | 10.3959917 | 2.68146368 | 0.39309566 | 6.82140241 | 9.0156E-12 | 3.0988E-11 |
| CDK5R2  | ENSG00000171450 | protein_coding | 9.99187048 | 2.46526741 | 0.33010121 | 7.46821681 | 8.1289E-14 | 3.2263E-13 |
| DLK2    | ENSG00000171462 | protein_coding | 118.307892 | 2.33216179 | 0.1601961  | 14.5581681 | 5.1828E-48 | 1.1303E-46 |
| NLRP5   | ENSG00000171487 | protein_coding | 1.80547345 | 2.45778092 | 0.46922151 | 5.23799711 | 1.6233E-07 | 3.9859E-07 |
| SPACA5  | ENSG00000171489 | protein_coding | 0.57164044 | 1.0483467  | 0.30710186 | 3.41367746 | 0.00064092 | 0.00110499 |
| OR1N2   | ENSG00000171501 | protein_coding | 0.85570811 | 1.08123053 | 0.50739093 | 2.1309615  | 0.03309231 | 0.04595949 |
| OR1N1   | ENSG00000171505 | protein_coding | 1.43109745 | 1.84386744 | 0.4688015  | 3.93315179 | 8.3839E-05 | 0.00015913 |
| NEUROD2 | ENSG00000171532 | protein_coding | 4.9801448  | 1.51334067 | 0.2471968  | 6.12200749 | 9.2404E-10 | 2.7362E-09 |
| OTP     | ENSG00000171540 | protein_coding | 2.90933196 | 2.30432993 | 0.35072383 | 6.57021199 | 5.0244E-11 | 1.6369E-10 |
| FGG     | ENSG00000171557 | protein_coding | 3893.87347 | 6.19622009 | 0.42132486 | 14.7065142 | 5.8546E-49 | 1.328E-47  |
| FGA     | ENSG00000171560 | protein_coding | 1965.1206  | 3.30579436 | 0.36974195 | 8.94081507 | 3.8631E-19 | 2.1452E-18 |
| OR2AT4  | ENSG00000171561 | protein_coding | 1.66611693 | 3.15784283 | 0.50522615 | 6.25035509 | 4.0952E-10 | 1.2473E-09 |
| FGB     | ENSG00000171564 | protein_coding | 7863.56776 | 3.05770486 | 0.40155458 | 7.61466811 | 2.6437E-14 | 1.0822E-13 |
| DSCAM   | ENSG00000171587 | protein_coding | 23.8615277 | 1.90805461 | 0.25943678 | 7.35460346 | 1.9149E-13 | 7.4047E-13 |
| DNAI2   | ENSG00000171595 | protein_coding | 8.36664456 | 1.34603294 | 0.17441775 | 7.71729331 | 1.1883E-14 | 4.9832E-14 |
| NMUR1   | ENSG00000171596 | protein_coding | 214.720711 | 1.04564022 | 0.12257984 | 8.53027918 | 1.4599E-17 | 7.3853E-17 |
| PTCRA   | ENSG00000171611 | protein_coding | 14.1372404 | 2.93661047 | 0.17886524 | 16.4180052 | 1.4216E-60 | 4.9147E-59 |
| SPSB1   | ENSG00000171621 | protein_coding | 2684.08847 | 1.29080963 | 0.13456348 | 9.59257022 | 8.5918E-22 | 5.5317E-21 |
| S100Z   | ENSG00000171643 | protein_coding | 18.7544438 | 2.26057039 | 0.14575209 | 15.5096944 | 2.983E-54  | 8.2474E-53 |
| GPR82   | ENSG00000171657 | protein_coding | 90.3860323 | 2.04633889 | 0.15561667 | 13.1498693 | 1.7047E-39 | 2.6118E-38 |
| GPR34   | ENSG00000171659 | protein_coding | 915.353941 | 1.61312236 | 0.14179314 | 11.3765899 | 5.4697E-30 | 5.4108E-29 |



|            |                 |                |            |            |            |            |            |            |
|------------|-----------------|----------------|------------|------------|------------|------------|------------|------------|
| LKAAEAR1   | ENSG00000171695 | protein_coding | 2.60027244 | 1.61567126 | 0.30675142 | 5.26703755 | 1.3864E-07 | 3.4227E-07 |
| RGS19      | ENSG00000171700 | protein_coding | 868.308903 | 1.71498896 | 0.08247787 | 20.7933224 | 4.9745E-96 | 6.4783E-94 |
| LGALS4     | ENSG00000171747 | protein_coding | 2113.56609 | 3.4385097  | 0.33001436 | 10.419273  | 2.025E-25  | 1.5876E-24 |
| RASGRP4    | ENSG00000171777 | protein_coding | 200.783368 | 1.72841351 | 0.09853651 | 17.5408428 | 6.9883E-69 | 3.2261E-67 |
| NHLH1      | ENSG00000171786 | protein_coding | 13.589344  | 2.0658053  | 0.15646321 | 13.2031375 | 8.4156E-40 | 1.2985E-38 |
| SLFNL1     | ENSG00000171790 | protein_coding | 42.0256893 | 2.19682558 | 0.15283049 | 14.3742627 | 7.5065E-47 | 1.5585E-45 |
| UTF1       | ENSG00000171794 | protein_coding | 1.18817225 | 1.44534666 | 0.29704964 | 4.86567378 | 1.1407E-06 | 2.5953E-06 |
| KNDC1      | ENSG00000171798 | protein_coding | 470.732969 | 1.65283858 | 0.21528962 | 7.67727936 | 1.625E-14  | 6.7482E-14 |
| NINJ2      | ENSG00000171840 | protein_coding | 136.304692 | 1.64738043 | 0.12166773 | 13.5399947 | 9.0795E-42 | 1.5196E-40 |
| RRM2       | ENSG00000171848 | protein_coding | 757.907554 | 2.15401792 | 0.15321156 | 14.0591086 | 6.7734E-45 | 1.2948E-43 |
| IFNB1      | ENSG00000171855 | protein_coding | 0.71682947 | 1.49117133 | 0.34634364 | 4.30546764 | 1.6663E-05 | 3.3933E-05 |
| C3AR1      | ENSG00000171860 | protein_coding | 1408.21918 | 1.8738176  | 0.12200931 | 15.3579882 | 3.1314E-53 | 8.4143E-52 |
| PRND       | ENSG00000171864 | protein_coding | 338.902251 | 3.26610966 | 0.26462314 | 12.3424944 | 5.3473E-35 | 6.7213E-34 |
| KLF17      | ENSG00000171872 | protein_coding | 2.88844658 | 1.78724946 | 0.39477083 | 4.52730886 | 5.974E-06  | 1.2708E-05 |
| LGALS9C    | ENSG00000171916 | protein_coding | 5.35511771 | 1.76916607 | 0.18181909 | 9.73036489 | 2.2379E-22 | 1.4818E-21 |
| SCG2       | ENSG00000171951 | protein_coding | 433.871663 | 3.89482667 | 0.23357024 | 16.6751836 | 1.986E-62  | 7.2427E-61 |
| CYP4F22    | ENSG00000171954 | protein_coding | 19.104482  | 1.50940504 | 0.15369056 | 9.82106561 | 9.1373E-23 | 6.1861E-22 |
| FOXB1      | ENSG00000171956 | protein_coding | 5.47086347 | 2.20156771 | 0.33645625 | 6.54339972 | 6.0136E-11 | 1.9464E-10 |
| SYNPO      | ENSG00000171992 | protein_coding | 26629.1883 | 1.10911928 | 0.11549214 | 9.60341822 | 7.7336E-22 | 4.9946E-21 |
| ANKRD20A4P | ENSG00000172014 | protein_coding | 7.15244492 | 1.18650702 | 0.23728853 | 5.0002712  | 5.725E-07  | 1.3401E-06 |
| REG3A      | ENSG00000172016 | protein_coding | 2.39083833 | 3.88300128 | 0.5195349  | 7.47399507 | 7.7796E-14 | 3.0925E-13 |
| GAP43      | ENSG00000172020 | protein_coding | 27.885309  | 1.44185619 | 0.22961832 | 6.27936039 | 3.3997E-10 | 1.0413E-09 |
| REG1B      | ENSG00000172023 | protein_coding | 60.7086751 | 4.08073173 | 0.39441096 | 10.3463953 | 4.3454E-25 | 3.3361E-24 |
| LRRC15     | ENSG00000172061 | protein_coding | 108.504231 | 1.25279942 | 0.28449485 | 4.40359257 | 1.0647E-05 | 2.2109E-05 |
| TEX37      | ENSG00000172073 | protein_coding | 0.62585848 | 1.89030469 | 0.58928365 | 3.20780099 | 0.00133754 | 0.00222693 |

|         |                 |                |            |            |            |            |            |            |
|---------|-----------------|----------------|------------|------------|------------|------------|------------|------------|
| MOB3A   | ENSG00000172081 | protein_coding | 4415.20723 | 1.07798691 | 0.06383244 | 16.8877608 | 5.5365E-64 | 2.1363E-62 |
| CD8B    | ENSG00000172116 | protein_coding | 401.315688 | 3.39853474 | 0.19672985 | 17.2751354 | 7.2403E-67 | 3.1048E-65 |
| CALB2   | ENSG00000172137 | protein_coding | 31.4554804 | 2.29995741 | 0.21380178 | 10.7574287 | 5.4674E-27 | 4.6664E-26 |
| ISG20   | ENSG00000172183 | protein_coding | 828.634756 | 2.35202066 | 0.11649322 | 20.1901943 | 1.1939E-90 | 1.2272E-88 |
| CXCR6   | ENSG00000172215 | protein_coding | 399.686369 | 2.69809348 | 0.15255344 | 17.6862191 | 5.355E-70  | 2.584E-68  |
| CEBPB   | ENSG00000172216 | protein_coding | 2626.42464 | 1.39156786 | 0.13344102 | 10.4283364 | 1.8408E-25 | 1.4467E-24 |
| AZU1    | ENSG00000172232 | protein_coding | 8.44798138 | 2.38378805 | 0.23560574 | 10.1176993 | 4.6113E-24 | 3.3468E-23 |
| TPSAB1  | ENSG00000172236 | protein_coding | 409.076145 | 1.65385597 | 0.17730589 | 9.32769894 | 1.0819E-20 | 6.5588E-20 |
| CLEC7A  | ENSG00000172243 | protein_coding | 829.423737 | 2.33370488 | 0.12769873 | 18.275083  | 1.3069E-74 | 7.4888E-73 |
| OR10V1  | ENSG00000172289 | protein_coding | 0.42458953 | 1.02781216 | 0.48497489 | 2.11931006 | 0.03406427 | 0.04721924 |
| B3GALT1 | ENSG00000172318 | protein_coding | 23.8100863 | 1.28974736 | 0.18663421 | 6.91056262 | 4.8274E-12 | 1.6907E-11 |
| OR5A1   | ENSG00000172320 | protein_coding | 0.68138635 | 2.00309048 | 0.55499182 | 3.60922523 | 0.00030711 | 0.00054818 |
| CLEC12A | ENSG00000172322 | protein_coding | 234.527629 | 2.79336948 | 0.15413761 | 18.1225687 | 2.1149E-73 | 1.1569E-71 |
| IL16    | ENSG00000172349 | protein_coding | 1382.29443 | 1.84782345 | 0.10260539 | 18.0090296 | 1.655E-72  | 8.7206E-71 |
| OR9I1   | ENSG00000172377 | protein_coding | 0.68257441 | 1.78519466 | 0.33788419 | 5.28345125 | 1.2677E-07 | 3.1406E-07 |
| PRSS27  | ENSG00000172382 | protein_coding | 89.394581  | 1.16494433 | 0.11934548 | 9.76110989 | 1.6534E-22 | 1.1034E-21 |
| INSL5   | ENSG00000172410 | protein_coding | 1.90902344 | 1.52574948 | 0.3059489  | 4.98694228 | 6.1342E-07 | 1.4318E-06 |
| EFCAB3  | ENSG00000172421 | protein_coding | 4.40673244 | 3.6514844  | 0.31107167 | 11.7384022 | 8.1002E-32 | 8.7638E-31 |
| RSPH9   | ENSG00000172426 | protein_coding | 141.773708 | 1.15456768 | 0.10670838 | 10.8198408 | 2.7726E-27 | 2.404E-26  |
| CTSW    | ENSG00000172543 | protein_coding | 803.306152 | 3.0156394  | 0.15811999 | 19.0718417 | 4.3279E-81 | 3.1442E-79 |
| NIPAL4  | ENSG00000172548 | protein_coding | 27.6582977 | 2.19991382 | 0.27789461 | 7.91636023 | 2.4456E-15 | 1.0743E-14 |
| KLHL6   | ENSG00000172578 | protein_coding | 746.498341 | 2.59874541 | 0.12561773 | 20.6877285 | 4.4677E-95 | 5.5805E-93 |
| SMPDL3A | ENSG00000172594 | protein_coding | 5778.59733 | 1.79107447 | 0.11242953 | 15.9306402 | 3.8836E-57 | 1.1908E-55 |
| AGAP5   | ENSG00000172650 | protein_coding | 17.6828367 | 1.72956926 | 0.14963697 | 11.5584352 | 6.6917E-31 | 6.8996E-30 |
| THEMIS  | ENSG00000172673 | protein_coding | 256.117785 | 2.20954868 | 0.16798884 | 13.1529494 | 1.6366E-39 | 2.5126E-38 |

|          |                 |                |            |            |            |            |            |            |
|----------|-----------------|----------------|------------|------------|------------|------------|------------|------------|
| SLFN11   | ENSG00000172716 | protein_coding | 3174.03462 | 1.68887438 | 0.09747786 | 17.325722  | 3.009E-67  | 1.3062E-65 |
| TMCC1    | ENSG00000172765 | protein_coding | 5625.85293 | 1.77652638 | 0.08384767 | 21.1875474 | 1.244E-99  | 1.8279E-97 |
| OR10W1   | ENSG00000172772 | protein_coding | 0.67733423 | 2.02560504 | 0.51507772 | 3.93262019 | 8.4025E-05 | 0.00015947 |
| RAB37    | ENSG00000172794 | protein_coding | 731.986582 | 1.88860252 | 0.10490092 | 18.0036797 | 1.8229E-72 | 9.5832E-71 |
| RPL38    | ENSG00000172809 | protein_coding | 17933.0249 | 1.01510102 | 0.08361903 | 12.139594  | 6.5148E-34 | 7.7915E-33 |
| CES4A    | ENSG00000172824 | protein_coding | 1766.0721  | 4.13631056 | 0.19145145 | 21.6050109 | 1.612E-103 | 2.777E-101 |
| CES3     | ENSG00000172828 | protein_coding | 3677.73077 | 1.72464768 | 0.20246204 | 8.51837533 | 1.6181E-17 | 8.1555E-17 |
| EGFL7    | ENSG00000172889 | protein_coding | 3881.82333 | 1.15102894 | 0.12685187 | 9.07380383 | 1.1493E-19 | 6.5825E-19 |
| NADSYN1  | ENSG00000172890 | protein_coding | 3728.94126 | 1.05296433 | 0.07213019 | 14.5981078 | 2.8875E-48 | 6.3698E-47 |
| MYEOV    | ENSG00000172927 | protein_coding | 1438.58477 | 7.09691264 | 0.27644445 | 25.6721114 | 2.395E-145 | 1.39E-142  |
| XKR3     | ENSG00000172967 | protein_coding | 5.11454401 | 2.08033538 | 0.2998757  | 6.93732558 | 3.9959E-12 | 1.4082E-11 |
| SH3RF3   | ENSG00000172985 | protein_coding | 968.903905 | 1.14436349 | 0.10042262 | 11.395475  | 4.4042E-30 | 4.3738E-29 |
| GXYLT2   | ENSG00000172986 | protein_coding | 502.204718 | 1.95090913 | 0.19493076 | 10.0082159 | 1.4026E-23 | 9.9131E-23 |
| ARPP21   | ENSG00000172995 | protein_coding | 92.4005917 | 1.19131425 | 0.29929883 | 3.98035048 | 6.8814E-05 | 0.00013162 |
| HSPA6    | ENSG00000173110 | protein_coding | 307.752825 | 1.90368184 | 0.12164449 | 15.649552  | 3.3457E-55 | 9.5736E-54 |
| ADAMTS20 | ENSG00000173157 | protein_coding | 15.8432832 | 5.46881207 | 0.38247919 | 14.2983257 | 2.2414E-46 | 4.5706E-45 |
| CYSLTR1  | ENSG00000173198 | protein_coding | 320.935557 | 1.12766615 | 0.10906295 | 10.3395897 | 4.6653E-25 | 3.5763E-24 |
| PARP15   | ENSG00000173200 | protein_coding | 175.159804 | 2.66412853 | 0.1525137  | 17.4681263 | 2.5059E-68 | 1.1329E-66 |
| ABLIM3   | ENSG00000173210 | protein_coding | 6849.21198 | 1.95845819 | 0.13641464 | 14.356657  | 9.6784E-47 | 2.0003E-45 |
| SYT12    | ENSG00000173227 | protein_coding | 359.429325 | 1.97477445 | 0.22025858 | 8.96570947 | 3.0829E-19 | 1.7226E-18 |
| C11orf86 | ENSG00000173237 | protein_coding | 65.5435721 | 2.48161489 | 0.3012834  | 8.23681242 | 1.7686E-16 | 8.3461E-16 |
| GPR151   | ENSG00000173250 | protein_coding | 1.12088806 | 1.50017543 | 0.40657042 | 3.68982923 | 0.0002244  | 0.00040681 |
| PLAC8L1  | ENSG00000173261 | protein_coding | 18.4470829 | 2.63858922 | 0.17491694 | 15.0848125 | 2.0385E-51 | 5.1065E-50 |
| SLC2A14  | ENSG00000173262 | protein_coding | 44.4720182 | 2.38147867 | 0.20863501 | 11.4145685 | 3.5365E-30 | 3.5282E-29 |
| MZT2A    | ENSG00000173272 | protein_coding | 2285.58251 | 1.60430426 | 0.12608868 | 12.7236184 | 4.3714E-37 | 6.0595E-36 |

|          |                 |                |            |            |            |            |            |            |
|----------|-----------------|----------------|------------|------------|------------|------------|------------|------------|
| PPP1R3B  | ENSG00000173281 | protein_coding | 6836.5904  | 1.31112492 | 0.09569421 | 13.7011935 | 9.9869E-43 | 1.752E-41  |
| KCNK7    | ENSG00000173338 | protein_coding | 23.366718  | 1.68316414 | 0.13570834 | 12.4028054 | 2.5233E-35 | 3.2329E-34 |
| C1QB     | ENSG00000173369 | protein_coding | 14861.518  | 2.92212192 | 0.14093284 | 20.7341443 | 1.7046E-95 | 2.1408E-93 |
| C1QA     | ENSG00000173372 | protein_coding | 12613.6101 | 2.60715327 | 0.13809144 | 18.8799054 | 1.6688E-79 | 1.1435E-77 |
| IHO1     | ENSG00000173421 | protein_coding | 34.4503659 | 1.33434873 | 0.14713504 | 9.06887126 | 1.2026E-19 | 6.8779E-19 |
| SAA1     | ENSG00000173432 | protein_coding | 1673.04256 | 4.30165489 | 0.37461477 | 11.4828759 | 1.6084E-30 | 1.6337E-29 |
| EHBP1L1  | ENSG00000173442 | protein_coding | 3439.61413 | 1.42606624 | 0.07817836 | 18.2411879 | 2.4312E-74 | 1.3759E-72 |
| TMEM196  | ENSG00000173452 | protein_coding | 15.8179297 | 1.90854381 | 0.38159632 | 5.00147334 | 5.6894E-07 | 1.332E-06  |
| CSPG4    | ENSG00000173546 | protein_coding | 8298.98323 | 2.71959893 | 0.12553927 | 21.6633331 | 4.551E-104 | 8.024E-102 |
| SNX33    | ENSG00000173548 | protein_coding | 5954.09356 | 1.304942   | 0.06795612 | 19.2027142 | 3.5125E-82 | 2.631E-80  |
| NABP1    | ENSG00000173559 | protein_coding | 1314.11187 | 1.14854816 | 0.11827552 | 9.71078507 | 2.7124E-22 | 1.7898E-21 |
| NLRP13   | ENSG00000173572 | protein_coding | 1.08597971 | 2.70662734 | 0.48304818 | 5.60322433 | 2.104E-08  | 5.5616E-08 |
| XCR1     | ENSG00000173578 | protein_coding | 154.382575 | 1.30353989 | 0.20007178 | 6.51536105 | 7.2515E-11 | 2.3347E-10 |
| SPDYE2B  | ENSG00000173678 | protein_coding | 2.07761635 | 1.89759056 | 0.34277202 | 5.53601353 | 3.0943E-08 | 8.0664E-08 |
| ADGRG2   | ENSG00000173698 | protein_coding | 482.373659 | 2.53593196 | 0.23547397 | 10.7694788 | 4.7971E-27 | 4.1073E-26 |
| SPATA3   | ENSG00000173699 | protein_coding | 1.08624791 | 2.12486852 | 0.47735669 | 4.45132239 | 8.5343E-06 | 1.7875E-05 |
| CD7      | ENSG00000173762 | protein_coding | 458.256905 | 2.73309085 | 0.16149481 | 16.9237066 | 3.0088E-64 | 1.1749E-62 |
| C1QTNF1  | ENSG00000173918 | protein_coding | 3566.09651 | 1.17768088 | 0.1492606  | 7.89009854 | 3.0195E-15 | 1.3172E-14 |
| MARCHF3  | ENSG00000173926 | protein_coding | 235.703889 | 1.43353573 | 0.09262247 | 15.4771916 | 4.946E-54  | 1.3609E-52 |
| C9orf131 | ENSG00000174038 | protein_coding | 5.99472197 | 1.79910876 | 0.22433886 | 8.0196038  | 1.0609E-15 | 4.7692E-15 |
| TLR10    | ENSG00000174123 | protein_coding | 114.2977   | 1.81825014 | 0.16487047 | 11.0283556 | 2.7892E-28 | 2.5389E-27 |
| TLR6     | ENSG00000174130 | protein_coding | 237.596934 | 1.72391709 | 0.11875837 | 14.5161734 | 9.5706E-48 | 2.0597E-46 |
| NWD2     | ENSG00000174145 | protein_coding | 2.15740661 | 1.37781382 | 0.307837   | 4.47579022 | 7.6129E-06 | 1.6027E-05 |
| ZNF80    | ENSG00000174255 | protein_coding | 12.4542182 | 2.59629507 | 0.21484179 | 12.0846839 | 1.2726E-33 | 1.5024E-32 |
| EVX2     | ENSG00000174279 | protein_coding | 2.10088953 | 1.23248209 | 0.28117744 | 4.38328936 | 1.169E-05  | 2.4169E-05 |

|          |                 |                |            |            |            |            |            |            |
|----------|-----------------|----------------|------------|------------|------------|------------|------------|------------|
| PHLDA3   | ENSG00000174307 | protein_coding | 3204.40781 | 1.64910063 | 0.11674546 | 14.1256086 | 2.6411E-45 | 5.1388E-44 |
| GLIS1    | ENSG00000174332 | protein_coding | 708.999361 | 1.85685039 | 0.158482   | 11.716475  | 1.0495E-31 | 1.1299E-30 |
| CHRNA9   | ENSG00000174343 | protein_coding | 1.64891858 | 1.59726021 | 0.36967527 | 4.32071157 | 1.5553E-05 | 3.1757E-05 |
| EXO1     | ENSG00000174371 | protein_coding | 113.81895  | 1.68029395 | 0.13246816 | 12.6845121 | 7.2061E-37 | 9.8844E-36 |
| TRHR     | ENSG00000174417 | protein_coding | 1.12822317 | 1.62144384 | 0.35602494 | 4.55429846 | 5.2561E-06 | 1.1238E-05 |
| GOLGA6L2 | ENSG00000174450 | protein_coding | 19.3042939 | 6.33191806 | 0.52419685 | 12.0792752 | 1.3591E-33 | 1.6012E-32 |
| VWC2L    | ENSG00000174453 | protein_coding | 9.54416282 | 1.21757382 | 0.18788441 | 6.48044079 | 9.1455E-11 | 2.9213E-10 |
| ANKRD36C | ENSG00000174501 | protein_coding | 148.043121 | 1.69185466 | 0.16048596 | 10.5420727 | 5.5267E-26 | 4.473E-25  |
| MYO1H    | ENSG00000174527 | protein_coding | 33.9717168 | 1.434923   | 0.17336354 | 8.27695961 | 1.2636E-16 | 6.0288E-16 |
| IL20RB   | ENSG00000174564 | protein_coding | 1387.42894 | 6.58176797 | 0.29476122 | 22.3291517 | 1.925E-110 | 4.183E-108 |
| BRSK2    | ENSG00000174672 | protein_coding | 57.0966895 | 1.23575154 | 0.18644815 | 6.62785613 | 3.406E-11  | 1.1246E-10 |
| SH3PXD2B | ENSG00000174705 | protein_coding | 1994.09487 | 1.5267387  | 0.12136677 | 12.579545  | 2.736E-36  | 3.6609E-35 |
| RIN1     | ENSG00000174791 | protein_coding | 556.300333 | 2.04186332 | 0.13189841 | 15.4805758 | 4.6925E-54 | 1.292E-52  |
| ODAPH    | ENSG00000174792 | protein_coding | 8.90552019 | 2.08747344 | 0.26436207 | 7.8962668  | 2.8738E-15 | 1.2561E-14 |
| CD248    | ENSG00000174807 | protein_coding | 4080.55952 | 1.77082167 | 0.13667149 | 12.9567744 | 2.151E-38  | 3.1333E-37 |
| ADGRE1   | ENSG00000174837 | protein_coding | 220.116027 | 2.72750296 | 0.16075611 | 16.9667138 | 1.4481E-64 | 5.7227E-63 |
| CNIH2    | ENSG00000174871 | protein_coding | 31.1308534 | 1.95228907 | 0.14243556 | 13.706472  | 9.2865E-43 | 1.6329E-41 |
| NLRP6    | ENSG00000174885 | protein_coding | 287.345313 | 1.36558823 | 0.18078373 | 7.55371206 | 4.2302E-14 | 1.7097E-13 |
| CATSPERD | ENSG00000174898 | protein_coding | 3.63178547 | 3.35228009 | 0.40447659 | 8.28794593 | 1.1522E-16 | 5.5117E-16 |
| SEZ6L2   | ENSG00000174938 | protein_coding | 4449.09767 | 2.27545999 | 0.15052233 | 15.1170925 | 1.2494E-51 | 3.1538E-50 |
| ASPHD1   | ENSG00000174939 | protein_coding | 696.564954 | 2.64852564 | 0.15625776 | 16.9497228 | 1.9336E-64 | 7.6086E-63 |
| KCTD13   | ENSG00000174943 | protein_coding | 788.599079 | 1.0227839  | 0.07278248 | 14.0526115 | 7.4245E-45 | 1.4157E-43 |
| P2RY14   | ENSG00000174944 | protein_coding | 312.670256 | 1.09513317 | 0.13186538 | 8.30493323 | 9.9876E-17 | 4.7936E-16 |
| AMZ1     | ENSG00000174945 | protein_coding | 122.180023 | 3.78731739 | 0.2142055  | 17.6807663 | 5.8989E-70 | 2.8375E-68 |
| GPR171   | ENSG00000174946 | protein_coding | 127.721118 | 1.67318283 | 0.15050661 | 11.1170057 | 1.0369E-28 | 9.6673E-28 |

|          |                 |                |            |            |            |            |            |            |
|----------|-----------------|----------------|------------|------------|------------|------------|------------|------------|
| ZIC4     | ENSG00000174963 | protein_coding | 6.31945006 | 2.19399908 | 0.37534744 | 5.84524859 | 5.0581E-09 | 1.409E-08  |
| UBE2C    | ENSG00000175063 | protein_coding | 410.439934 | 2.9372885  | 0.18897843 | 15.5429832 | 1.7752E-54 | 4.9531E-53 |
| RTP1     | ENSG00000175077 | protein_coding | 1.09330399 | 1.08058489 | 0.35292914 | 3.06176161 | 0.00220039 | 0.0035713  |
| NPPA     | ENSG00000175206 | protein_coding | 8.67311926 | 2.01861906 | 0.19890469 | 10.1486753 | 3.3589E-24 | 2.4558E-23 |
| C1orf127 | ENSG00000175262 | protein_coding | 29.5466434 | 3.14004741 | 0.15575276 | 20.1604609 | 2.1784E-90 | 2.2093E-88 |
| CHST1    | ENSG00000175264 | protein_coding | 740.621386 | 1.45557021 | 0.17866278 | 8.14702522 | 3.7299E-16 | 1.7239E-15 |
| GOLGA8A  | ENSG00000175265 | protein_coding | 1307.91917 | 2.83232477 | 0.20348855 | 13.9188408 | 4.8673E-44 | 9.0224E-43 |
| VWA3A    | ENSG00000175267 | protein_coding | 29.9187159 | 1.07813742 | 0.22018601 | 4.89648469 | 9.7566E-07 | 2.234E-06  |
| TP53I11  | ENSG00000175274 | protein_coding | 7677.20908 | 1.07881153 | 0.10194169 | 10.5826335 | 3.5873E-26 | 2.9261E-25 |
| CATSPER1 | ENSG00000175294 | protein_coding | 35.7360509 | 2.00014913 | 0.14041941 | 14.2441076 | 4.8774E-46 | 9.7806E-45 |
| CCNE2    | ENSG00000175305 | protein_coding | 101.061539 | 1.55288803 | 0.08922578 | 17.4040283 | 7.69E-68   | 3.4093E-66 |
| PHYKPL   | ENSG00000175309 | protein_coding | 4172.8045  | 1.6190327  | 0.08572635 | 18.8860568 | 1.4854E-79 | 1.0208E-77 |
| PROP1    | ENSG00000175325 | protein_coding | 1.73764912 | 2.84059839 | 0.45071658 | 6.30240497 | 2.9306E-10 | 9.0139E-10 |
| ARL10    | ENSG00000175414 | protein_coding | 1343.29471 | 1.31056329 | 0.10792156 | 12.143665  | 6.1986E-34 | 7.421E-33  |
| CCDC14   | ENSG00000175455 | protein_coding | 1932.22717 | 1.13567982 | 0.09663487 | 11.7522782 | 6.874E-32  | 7.4547E-31 |
| TBC1D10C | ENSG00000175463 | protein_coding | 608.676293 | 2.53041431 | 0.13764461 | 18.383679  | 1.7751E-75 | 1.05E-73   |
| LRRC25   | ENSG00000175489 | protein_coding | 1033.38163 | 2.29112977 | 0.14361002 | 15.9538292 | 2.6795E-57 | 8.2938E-56 |
| TSGA10IP | ENSG00000175513 | protein_coding | 6.39328272 | 2.13063218 | 0.21870798 | 9.74190424 | 1.9978E-22 | 1.3259E-21 |
| KCNE3    | ENSG00000175538 | protein_coding | 4791.64925 | 2.11388797 | 0.11117054 | 19.0148217 | 1.2857E-80 | 9.1521E-79 |
| CCDC85B  | ENSG00000175602 | protein_coding | 1094.76048 | 1.31701881 | 0.13075503 | 10.0724142 | 7.316E-24  | 5.2476E-23 |
| CCDC197  | ENSG00000175699 | protein_coding | 1.74817156 | 2.70603441 | 0.46613171 | 5.8053     | 6.4251E-09 | 1.7733E-08 |
| B3GNTL1  | ENSG00000175711 | protein_coding | 270.644784 | 1.33364592 | 0.09017873 | 14.7889185 | 1.7271E-49 | 3.9985E-48 |
| PRIMA1   | ENSG00000175785 | protein_coding | 2172.8866  | 3.05403205 | 0.27252047 | 11.2066152 | 3.7839E-29 | 3.6107E-28 |
| CCDC168  | ENSG00000175820 | protein_coding | 17.6460768 | 1.6546565  | 0.17137156 | 9.65537385 | 4.6645E-22 | 3.0447E-21 |
| GAPT     | ENSG00000175857 | protein_coding | 350.030537 | 2.07529569 | 0.14738482 | 14.0807966 | 4.9845E-45 | 9.5844E-44 |



|         |                 |                |            |            |            |            |            |            |
|---------|-----------------|----------------|------------|------------|------------|------------|------------|------------|
| CREG2   | ENSG00000175874 | protein_coding | 179.53104  | 2.01258555 | 0.19445717 | 10.3497624 | 4.1953E-25 | 3.2251E-24 |
| ORAI3   | ENSG00000175938 | protein_coding | 1897.45884 | 1.28286615 | 0.09155009 | 14.0127246 | 1.3031E-44 | 2.4663E-43 |
| TUBB6   | ENSG00000176014 | protein_coding | 3821.63905 | 1.15881508 | 0.08907225 | 13.0098325 | 1.0758E-38 | 1.5882E-37 |
| AMIGO3  | ENSG00000176020 | protein_coding | 1.69171952 | 1.43413754 | 0.2589433  | 5.53842301 | 3.0521E-08 | 7.958E-08  |
| NUPR1   | ENSG00000176046 | protein_coding | 9307.93638 | 1.4621217  | 0.15860928 | 9.21838701 | 3.016E-20  | 1.7801E-19 |
| ZNF683  | ENSG00000176083 | protein_coding | 149.814708 | 3.37360419 | 0.18267213 | 18.4680838 | 3.7309E-76 | 2.2896E-74 |
| CCDC57  | ENSG00000176155 | protein_coding | 1297.48119 | 1.02837296 | 0.11067676 | 9.29167913 | 1.5187E-20 | 9.1473E-20 |
| HSF5    | ENSG00000176160 | protein_coding | 6.34840671 | 1.1186055  | 0.18574619 | 6.02222587 | 1.7203E-09 | 4.9853E-09 |
| FOXG1   | ENSG00000176165 | protein_coding | 5.4247943  | 1.74534168 | 0.29675803 | 5.88136288 | 4.069E-09  | 1.1418E-08 |
| SPHK1   | ENSG00000176170 | protein_coding | 452.249911 | 1.66683722 | 0.15781402 | 10.5620349 | 4.4687E-26 | 3.6321E-25 |
| BNIP3   | ENSG00000176171 | protein_coding | 14001.8491 | 1.52656538 | 0.09632477 | 15.8481076 | 1.4488E-56 | 4.3323E-55 |
| ENTHD1  | ENSG00000176177 | protein_coding | 5.7798028  | 2.18996693 | 0.2736901  | 8.00162998 | 1.2278E-15 | 5.5041E-15 |
| OR11H4  | ENSG00000176198 | protein_coding | 0.42547838 | 1.36781037 | 0.4054736  | 3.37336478 | 0.00074256 | 0.00127094 |
| LRRTM4  | ENSG00000176204 | protein_coding | 38.491401  | 2.44731963 | 0.29148492 | 8.39604204 | 4.6178E-17 | 2.264E-16  |
| ATAD5   | ENSG00000176208 | protein_coding | 230.044176 | 1.25438815 | 0.09721076 | 12.9037992 | 4.2844E-38 | 6.1976E-37 |
| OR4N2   | ENSG00000176294 | protein_coding | 0.75189612 | 1.8758539  | 0.5694103  | 3.29437999 | 0.00098639 | 0.00166656 |
| FOXR1   | ENSG00000176302 | protein_coding | 0.94273092 | 2.0980917  | 0.36981762 | 5.67331461 | 1.4006E-08 | 3.7602E-08 |
| TAC4    | ENSG00000176358 | protein_coding | 13.415207  | 1.2715087  | 0.15359022 | 8.2785786  | 1.2465E-16 | 5.9505E-16 |
| B3GNT4  | ENSG00000176383 | protein_coding | 420.150968 | 1.75842957 | 0.1727117  | 10.1812994 | 2.4033E-24 | 1.7749E-23 |
| CLEC14A | ENSG00000176435 | protein_coding | 4727.56079 | 1.33521208 | 0.12033576 | 11.0957215 | 1.3159E-28 | 1.2174E-27 |
| CLK2    | ENSG00000176444 | protein_coding | 2069.07422 | 1.03634877 | 0.08632397 | 12.0053415 | 3.3309E-33 | 3.8529E-32 |
| PLAAT3  | ENSG00000176485 | protein_coding | 7185.5911  | 1.04260874 | 0.07861545 | 13.262135  | 3.8381E-40 | 6.0213E-39 |
| CNBD1   | ENSG00000176571 | protein_coding | 0.7436933  | 1.96973148 | 0.43025922 | 4.57801105 | 4.6942E-06 | 1.009E-05  |
| FOXL1   | ENSG00000176678 | protein_coding | 270.184416 | 1.06407975 | 0.14408015 | 7.38533197 | 1.5207E-13 | 5.9249E-13 |
| FOXC2   | ENSG00000176692 | protein_coding | 784.188092 | 1.23561199 | 0.14790272 | 8.35422082 | 6.5866E-17 | 3.1981E-16 |

|          |                 |                |            |            |            |            |            |            |
|----------|-----------------|----------------|------------|------------|------------|------------|------------|------------|
| BDNF     | ENSG00000176697 | protein_coding | 249.195725 | 2.12100883 | 0.17918025 | 11.8372913 | 2.5041E-32 | 2.7754E-31 |
| CDK5R1   | ENSG00000176749 | protein_coding | 212.883263 | 1.06898741 | 0.09150659 | 11.6820817 | 1.5739E-31 | 1.6799E-30 |
| SOX11    | ENSG00000176887 | protein_coding | 328.218151 | 5.3936529  | 0.21869799 | 24.6625628 | 2.698E-134 | 1.167E-131 |
| TYMS     | ENSG00000176890 | protein_coding | 1575.00548 | 2.04392061 | 0.09046224 | 22.5941863 | 4.943E-113 | 1.133E-110 |
| C8G      | ENSG00000176919 | protein_coding | 57.6723304 | 1.5613889  | 0.19855154 | 7.86389722 | 3.7236E-15 | 1.6144E-14 |
| LY6H     | ENSG00000176956 | protein_coding | 124.606422 | 3.48137001 | 0.24397194 | 14.2695511 | 3.3875E-46 | 6.8499E-45 |
| FMR1NB   | ENSG00000176988 | protein_coding | 1.45440698 | 1.86384432 | 0.35064709 | 5.31544219 | 1.064E-07  | 2.6525E-07 |
| C19orf18 | ENSG00000177025 | protein_coding | 35.1743166 | 1.0068661  | 0.13784491 | 7.30434012 | 2.7863E-13 | 1.0637E-12 |
| SCN4B    | ENSG00000177098 | protein_coding | 2027.9885  | 1.94749853 | 0.14462284 | 13.4660507 | 2.4777E-41 | 4.09E-40   |
| DSCAML1  | ENSG00000177103 | protein_coding | 922.11788  | 1.30286789 | 0.12714753 | 10.2468991 | 1.222E-24  | 9.1803E-24 |
| RHOG     | ENSG00000177105 | protein_coding | 3038.22828 | 1.00591703 | 0.06983023 | 14.405179  | 4.8007E-47 | 1.0044E-45 |
| ZDHHC22  | ENSG00000177108 | protein_coding | 2.54308889 | 1.77393466 | 0.25897531 | 6.84982145 | 7.3942E-12 | 2.5584E-11 |
| FAM9B    | ENSG00000177138 | protein_coding | 8.78549604 | 2.46393136 | 0.29134664 | 8.45704399 | 2.7424E-17 | 1.3642E-16 |
| OR2T35   | ENSG00000177151 | protein_coding | 0.88239503 | 1.4499178  | 0.40705307 | 3.56198717 | 0.00036806 | 0.00065149 |
| RIMKLA   | ENSG00000177181 | protein_coding | 1743.60309 | 2.32707062 | 0.13693438 | 16.9940568 | 9.088E-65  | 3.6227E-63 |
| CLVS1    | ENSG00000177182 | protein_coding | 11.0347728 | 1.19297989 | 0.16518307 | 7.22216791 | 5.1165E-13 | 1.9181E-12 |
| KCNA3    | ENSG00000177272 | protein_coding | 70.7517822 | 1.350121   | 0.15416959 | 8.75737562 | 1.9985E-18 | 1.0658E-17 |
| FBXO39   | ENSG00000177294 | protein_coding | 21.2168306 | 2.30152957 | 0.16904546 | 13.614856  | 3.2679E-42 | 5.5814E-41 |
| KCNA2    | ENSG00000177301 | protein_coding | 17.4817518 | 1.00646305 | 0.24222536 | 4.15506889 | 3.2519E-05 | 6.4454E-05 |
| BEND2    | ENSG00000177324 | protein_coding | 2.00346738 | 1.42615237 | 0.32728143 | 4.35757194 | 1.3151E-05 | 2.7055E-05 |
| LRRN4CL  | ENSG00000177363 | protein_coding | 186.26547  | 1.60465274 | 0.25536527 | 6.28375477 | 3.3049E-10 | 1.0127E-09 |
| NIM1K    | ENSG00000177453 | protein_coding | 93.7832734 | 1.55435617 | 0.16075722 | 9.66896626 | 4.0848E-22 | 2.6747E-21 |
| GPR4     | ENSG00000177464 | protein_coding | 3086.05193 | 1.92833059 | 0.11413806 | 16.8947209 | 4.9204E-64 | 1.9018E-62 |
| RBM44    | ENSG00000177483 | protein_coding | 34.5820293 | 1.41863201 | 0.1436188  | 9.87776008 | 5.1982E-23 | 3.5613E-22 |
| IRX3     | ENSG00000177508 | protein_coding | 3792.9034  | 1.49931316 | 0.13310393 | 11.2642295 | 1.9707E-29 | 1.9067E-28 |

|           |                 |                |            |            |            |            |            |            |
|-----------|-----------------|----------------|------------|------------|------------|------------|------------|------------|
| ST8SIA3   | ENSG00000177511 | protein_coding | 2.86550195 | 2.42336135 | 0.45379973 | 5.34015598 | 9.2867E-08 | 2.3284E-07 |
| OR2B11    | ENSG00000177535 | protein_coding | 0.98347473 | 1.26779916 | 0.3337532  | 3.79861276 | 0.00014551 | 0.00026924 |
| CD163     | ENSG00000177575 | protein_coding | 5380.86328 | 1.8524187  | 0.16547249 | 11.1947233 | 4.3275E-29 | 4.1132E-28 |
| PIDD1     | ENSG00000177595 | protein_coding | 744.024185 | 1.38520898 | 0.10993929 | 12.599763  | 2.1178E-36 | 2.8478E-35 |
| HASPIN    | ENSG00000177602 | protein_coding | 41.3863999 | 1.71781059 | 0.13133915 | 13.0791966 | 4.3299E-39 | 6.5228E-38 |
| PGBD5     | ENSG00000177614 | protein_coding | 1350.79772 | 1.76644531 | 0.15277228 | 11.5626038 | 6.3746E-31 | 6.5796E-30 |
| MBOAT4    | ENSG00000177669 | protein_coding | 25.8193847 | 2.36838905 | 0.12696471 | 18.6539162 | 1.1736E-77 | 7.5986E-76 |
| CD163L1   | ENSG00000177675 | protein_coding | 400.653025 | 1.50860269 | 0.15978846 | 9.44124923 | 3.6836E-21 | 2.2903E-20 |
| SRRM3     | ENSG00000177679 | protein_coding | 207.804288 | 1.1908241  | 0.21068406 | 5.6521793  | 1.5843E-08 | 4.2356E-08 |
| CRACR2B   | ENSG00000177685 | protein_coding | 854.369757 | 1.2063681  | 0.13491558 | 8.94165171 | 3.834E-19  | 2.1293E-18 |
| SUMO4     | ENSG00000177688 | protein_coding | 8.67130944 | 1.55319168 | 0.19569348 | 7.93685979 | 2.0736E-15 | 9.1569E-15 |
| MAGEB10   | ENSG00000177689 | protein_coding | 0.77502451 | 1.59541527 | 0.72164418 | 2.21080598 | 0.02704928 | 0.03805794 |
| SLC35G5   | ENSG00000177710 | protein_coding | 5.97008712 | 1.27417935 | 0.22280206 | 5.71888507 | 1.0723E-08 | 2.9038E-08 |
| ANXA2R    | ENSG00000177721 | protein_coding | 242.920996 | 2.02944906 | 0.11883717 | 17.0775617 | 2.1804E-65 | 8.8532E-64 |
| PCDHB9    | ENSG00000177839 | protein_coding | 263.433006 | 1.58548279 | 0.12762757 | 12.4227296 | 1.9673E-35 | 2.5333E-34 |
| AP3S1     | ENSG00000177879 | protein_coding | 3045.964   | 1.02530112 | 0.06759959 | 15.1672681 | 5.8251E-52 | 1.501E-50  |
| MAMDC4    | ENSG00000177943 | protein_coding | 853.450039 | 1.77233107 | 0.148495   | 11.9352916 | 7.7487E-33 | 8.7923E-32 |
| ODF3      | ENSG00000177947 | protein_coding | 1.54984352 | 2.7254359  | 0.34879079 | 7.81395608 | 5.542E-15  | 2.3785E-14 |
| LCN15     | ENSG00000177984 | protein_coding | 2.73086009 | 1.58396429 | 0.3533086  | 4.48323164 | 7.3521E-06 | 1.5503E-05 |
| ODF3B     | ENSG00000177989 | protein_coding | 1406.734   | 3.52787591 | 0.13821247 | 25.5250191 | 1.04E-143  | 5.61E-141  |
| SPATA31E1 | ENSG00000177992 | protein_coding | 3.41456606 | 1.84435679 | 0.29348422 | 6.28434737 | 3.2923E-10 | 1.0091E-09 |
| GPR150    | ENSG00000178015 | protein_coding | 17.7276071 | 2.22847496 | 0.20012673 | 11.1353191 | 8.4442E-29 | 7.9143E-28 |
| TSPYL6    | ENSG00000178021 | protein_coding | 2.17374153 | 1.59884793 | 0.28049878 | 5.70001738 | 1.198E-08  | 3.233E-08  |
| LRRC75B   | ENSG00000178026 | protein_coding | 2099.22598 | 1.43450367 | 0.12652645 | 11.3375798 | 8.5476E-30 | 8.3993E-29 |
| ZNF114    | ENSG00000178150 | protein_coding | 175.520806 | 2.47573708 | 0.25921004 | 9.55108498 | 1.2835E-21 | 8.1828E-21 |

|               |                 |                |            |            |            |            |            |            |
|---------------|-----------------|----------------|------------|------------|------------|------------|------------|------------|
| SPINK6        | ENSG00000178172 | protein_coding | 1.0294081  | 1.59980875 | 0.40397446 | 3.96017298 | 7.4895E-05 | 0.00014275 |
| ZC3H12D       | ENSG00000178199 | protein_coding | 186.086356 | 1.52179672 | 0.12499696 | 12.1746701 | 4.2411E-34 | 5.1148E-33 |
| PRSS36        | ENSG00000178226 | protein_coding | 114.982843 | 1.07341678 | 0.10009009 | 10.7245065 | 7.8103E-27 | 6.6143E-26 |
| SPAG11A       | ENSG00000178287 | protein_coding | 0.49437359 | 1.52893658 | 0.60909543 | 2.51017575 | 0.01206711 | 0.01784702 |
| TMPRSS9       | ENSG00000178297 | protein_coding | 34.228461  | 2.71921319 | 0.18637632 | 14.5899073 | 3.2564E-48 | 7.1699E-47 |
| ZNF354B       | ENSG00000178338 | protein_coding | 576.104659 | 1.10772016 | 0.08768092 | 12.6335372 | 1.3794E-36 | 1.8713E-35 |
| CALML5        | ENSG00000178372 | protein_coding | 1.14979496 | 2.48355935 | 0.6632701  | 3.74441625 | 0.00018081 | 0.00033128 |
| DNAJC22       | ENSG00000178401 | protein_coding | 2921.68594 | 1.08746884 | 0.10960946 | 9.92130416 | 3.3633E-23 | 2.3283E-22 |
| NEUROG2       | ENSG00000178403 | protein_coding | 0.5657939  | 1.04363264 | 0.42423837 | 2.46001473 | 0.01389313 | 0.02037153 |
| TIMM23B-AGAP6 | ENSG00000178440 | protein_coding | 12.1284906 | 1.25624096 | 0.16331918 | 7.69193792 | 1.4492E-14 | 6.0367E-14 |
| CD28          | ENSG00000178562 | protein_coding | 283.55971  | 1.4145924  | 0.14154018 | 9.99428149 | 1.6145E-23 | 1.1369E-22 |
| PSAPL1        | ENSG00000178597 | protein_coding | 0.71208138 | 1.57622868 | 0.64635315 | 2.43864934 | 0.01474227 | 0.02153533 |
| OTOS          | ENSG00000178602 | protein_coding | 3.60558176 | 1.57064162 | 0.45304773 | 3.46683474 | 0.00052663 | 0.00091645 |
| GPR35         | ENSG00000178623 | protein_coding | 438.189165 | 2.41635193 | 0.20171167 | 11.9792373 | 4.565E-33  | 5.2461E-32 |
| CPNE7         | ENSG00000178773 | protein_coding | 181.857279 | 2.22987184 | 0.23472584 | 9.49989923 | 2.1009E-21 | 1.3251E-20 |
| C5orf46       | ENSG00000178776 | protein_coding | 885.95415  | 7.70552816 | 0.32554824 | 23.6693894 | 7.454E-124 | 2.341E-121 |
| CD300LB       | ENSG00000178789 | protein_coding | 115.432148 | 1.71696242 | 0.13403793 | 12.8095264 | 1.4502E-37 | 2.0534E-36 |
| GDPD4         | ENSG00000178795 | protein_coding | 15.3903958 | 1.0726847  | 0.18120649 | 5.91968136 | 3.2257E-09 | 9.1321E-09 |
| H1-8          | ENSG00000178804 | protein_coding | 0.44757414 | 1.1244395  | 0.34179963 | 3.28976216 | 0.00100272 | 0.00169253 |
| TRIM73        | ENSG00000178809 | protein_coding | 14.237732  | 2.03047584 | 0.1853468  | 10.9550086 | 6.2872E-28 | 5.6259E-27 |
| MSC           | ENSG00000178860 | protein_coding | 2213.35467 | 3.07472195 | 0.17477265 | 17.5926948 | 2.8023E-69 | 1.3081E-67 |
| APOLD1        | ENSG00000178878 | protein_coding | 14232.2403 | 1.94864387 | 0.15125363 | 12.883287  | 5.5903E-38 | 8.0334E-37 |
| RFLNA         | ENSG00000178882 | protein_coding | 188.978621 | 1.40921188 | 0.25245489 | 5.58203441 | 2.3772E-08 | 6.2542E-08 |
| TPRX1         | ENSG00000178928 | protein_coding | 0.48068053 | 1.20459096 | 0.53012712 | 2.27226812 | 0.02307032 | 0.03279785 |
| ERICH3        | ENSG00000178965 | protein_coding | 31.6212739 | 1.23227569 | 0.21223565 | 5.8061673  | 6.3919E-09 | 1.7645E-08 |

|          |                 |                |            |            |            |            |            |            |
|----------|-----------------|----------------|------------|------------|------------|------------|------------|------------|
| AURKB    | ENSG00000178999 | protein_coding | 173.057646 | 3.02822055 | 0.16332573 | 18.5409885 | 9.6433E-77 | 6.0473E-75 |
| EXOC3L1  | ENSG00000179044 | protein_coding | 920.333957 | 1.50882304 | 0.10324538 | 14.6139526 | 2.2885E-48 | 5.0802E-47 |
| TRIML2   | ENSG00000179046 | protein_coding | 4.63659492 | 3.65244449 | 0.37966986 | 9.62005389 | 6.5797E-22 | 4.2656E-21 |
| C9orf50  | ENSG00000179058 | protein_coding | 40.6451019 | 1.07703919 | 0.18030358 | 5.9734765  | 2.3225E-09 | 6.6599E-09 |
| HTR1F    | ENSG00000179097 | protein_coding | 108.68804  | 1.62401936 | 0.17147676 | 9.47078378 | 2.7775E-21 | 1.7401E-20 |
| HES7     | ENSG00000179111 | protein_coding | 8.13991896 | 1.04007023 | 0.23218474 | 4.47949443 | 7.482E-06  | 1.5764E-05 |
| GIMAP7   | ENSG00000179144 | protein_coding | 2139.43375 | 1.17538111 | 0.10334595 | 11.3732676 | 5.682E-30  | 5.6172E-29 |
| SIGLECL1 | ENSG00000179213 | protein_coding | 1.42407035 | 2.42327045 | 0.41312277 | 5.86573924 | 4.4714E-09 | 1.2513E-08 |
| GVQW3    | ENSG00000179240 | protein_coding | 251.061623 | 1.01317284 | 0.11753724 | 8.62001552 | 6.6945E-18 | 3.4551E-17 |
| LDLRAD3  | ENSG00000179241 | protein_coding | 1205.58773 | 1.46768528 | 0.08679784 | 16.9092382 | 3.8465E-64 | 1.4943E-62 |
| CDH4     | ENSG00000179242 | protein_coding | 1603.97656 | 4.06449706 | 0.23504602 | 17.292346  | 5.3721E-67 | 2.3123E-65 |
| DAND5    | ENSG00000179284 | protein_coding | 16.227654  | 2.73021617 | 0.21792861 | 12.5280298 | 5.2449E-36 | 6.9209E-35 |
| RTL3     | ENSG00000179300 | protein_coding | 4.18208742 | 1.37607544 | 0.29524409 | 4.66080611 | 3.1497E-06 | 6.8788E-06 |
| FAM156B  | ENSG00000179304 | protein_coding | 1.05473091 | 1.4014931  | 0.28539625 | 4.91069205 | 9.0756E-07 | 2.0854E-06 |
| RAB39A   | ENSG00000179331 | protein_coding | 56.3892158 | 1.39884744 | 0.16811888 | 8.32058531 | 8.753E-17  | 4.2174E-16 |
| HLA-DQB1 | ENSG00000179344 | protein_coding | 18266.3418 | 2.28654465 | 0.13521774 | 16.9100937 | 3.791E-64  | 1.474E-62  |
| VWA1     | ENSG00000179403 | protein_coding | 9353.20028 | 1.30152269 | 0.11025736 | 11.804406  | 3.704E-32  | 4.0737E-31 |
| DNAJB8   | ENSG00000179407 | protein_coding | 0.4854304  | 1.16290792 | 0.32559006 | 3.57169353 | 0.00035468 | 0.0006289  |
| FJX1     | ENSG00000179431 | protein_coding | 851.083187 | 1.50715018 | 0.10014138 | 15.0502241 | 3.4407E-51 | 8.5394E-50 |
| ALOX12B  | ENSG00000179477 | protein_coding | 50.0600988 | 1.93212204 | 0.17518416 | 11.0290913 | 2.7665E-28 | 2.5187E-27 |
| LBX2     | ENSG00000179528 | protein_coding | 63.2398131 | 2.04001231 | 0.12979456 | 15.7172403 | 1.1523E-55 | 3.354E-54  |
| DNHD1    | ENSG00000179532 | protein_coding | 673.57092  | 1.56308607 | 0.12821709 | 12.1909339 | 3.4742E-34 | 4.2065E-33 |
| RNF151   | ENSG00000179580 | protein_coding | 1.12000005 | 1.65030123 | 0.30852673 | 5.34897318 | 8.8455E-08 | 2.2215E-07 |
| CIITA    | ENSG00000179583 | protein_coding | 2533.84791 | 1.44004076 | 0.11695998 | 12.3122526 | 7.782E-35  | 9.7124E-34 |
| ALOX15B  | ENSG00000179593 | protein_coding | 238.14792  | 4.27786973 | 0.21885237 | 19.5468281 | 4.3898E-85 | 3.6856E-83 |

|          |                 |                |            |            |            |            |            |            |
|----------|-----------------|----------------|------------|------------|------------|------------|------------|------------|
| GRM8     | ENSG00000179603 | protein_coding | 494.2295   | 2.02348335 | 0.18588865 | 10.8854594 | 1.3522E-27 | 1.1874E-26 |
| RPRML    | ENSG00000179673 | protein_coding | 1.21564129 | 1.294649   | 0.34181997 | 3.78751717 | 0.00015216 | 0.00028092 |
| WDR97    | ENSG00000179698 | protein_coding | 89.3581579 | 2.42241838 | 0.1823285  | 13.2860106 | 2.7907E-40 | 4.4052E-39 |
| NLRP8    | ENSG00000179709 | protein_coding | 1.32981498 | 2.14952256 | 0.46566065 | 4.61607087 | 3.9107E-06 | 8.4662E-06 |
| PCED1B   | ENSG00000179715 | protein_coding | 529.531733 | 1.68728945 | 0.10511645 | 16.0516209 | 5.569E-58  | 1.7667E-56 |
| FOXS1    | ENSG00000179772 | protein_coding | 406.997683 | 1.57981541 | 0.15056854 | 10.4923343 | 9.3685E-26 | 7.4897E-25 |
| CDH5     | ENSG00000179776 | protein_coding | 9285.69007 | 1.231252   | 0.11040675 | 11.1519628 | 7.0044E-29 | 6.5864E-28 |
| LRRC3B   | ENSG00000179796 | protein_coding | 14.2651157 | 1.59855229 | 0.24739927 | 6.46142688 | 1.0372E-10 | 3.3009E-10 |
| MRGPRX3  | ENSG00000179826 | protein_coding | 0.75970389 | 1.32680285 | 0.43784437 | 3.03030698 | 0.00244305 | 0.00394685 |
| NKPD1    | ENSG00000179846 | protein_coding | 13.4844734 | 2.67319982 | 0.18799708 | 14.219369  | 6.9477E-46 | 1.3847E-44 |
| GIPC3    | ENSG00000179855 | protein_coding | 1130.75382 | 1.25493151 | 0.11203673 | 11.2010718 | 4.0283E-29 | 3.8335E-28 |
| CITED4   | ENSG00000179862 | protein_coding | 1187.69142 | 1.02930008 | 0.1351316  | 7.61702    | 2.596E-14  | 1.0635E-13 |
| NLRP11   | ENSG00000179873 | protein_coding | 75.4581857 | 1.03403234 | 0.17484382 | 5.91403426 | 3.3383E-09 | 9.4358E-09 |
| CCR8     | ENSG00000179934 | protein_coding | 17.278102  | 2.78919977 | 0.22755656 | 12.2571717 | 1.5377E-34 | 1.8919E-33 |
| GOLGA8J  | ENSG00000179938 | protein_coding | 0.62209525 | 1.05128198 | 0.39034903 | 2.69318453 | 0.00707731 | 0.01081472 |
| WFDC11   | ENSG00000180083 | protein_coding | 0.46353128 | 1.42821817 | 0.5499637  | 2.5969317  | 0.00940606 | 0.01413438 |
| TMEM86B  | ENSG00000180089 | protein_coding | 101.803282 | 1.26084611 | 0.12727736 | 9.9062873  | 3.909E-23  | 2.6963E-22 |
| SEPTIN1  | ENSG00000180096 | protein_coding | 735.655587 | 1.82808942 | 0.10958492 | 16.6819437 | 1.7735E-62 | 6.473E-61  |
| TDRD6    | ENSG00000180113 | protein_coding | 140.752015 | 1.86752793 | 0.13911781 | 13.4240751 | 4.3701E-41 | 7.1266E-40 |
| C12orf40 | ENSG00000180116 | protein_coding | 2.76472745 | 2.91765575 | 0.39268086 | 7.4300941  | 1.0852E-13 | 4.2716E-13 |
| F2       | ENSG00000180210 | protein_coding | 249.94931  | 5.41794488 | 0.35791898 | 15.13735   | 9.1841E-52 | 2.3324E-50 |
| FAM71C   | ENSG00000180219 | protein_coding | 1.47046483 | 1.99529308 | 0.33831732 | 5.89769702 | 3.6861E-09 | 1.0385E-08 |
| ADGRD2   | ENSG00000180264 | protein_coding | 1.85920304 | 1.44070264 | 0.33537069 | 4.29585135 | 1.7402E-05 | 3.5381E-05 |
| KCTD4    | ENSG00000180332 | protein_coding | 39.8917031 | 1.1523928  | 0.23025273 | 5.00490392 | 5.589E-07  | 1.3098E-06 |
| ITPRID1  | ENSG00000180347 | protein_coding | 4.2562166  | 1.03522611 | 0.25582974 | 4.04654329 | 5.198E-05  | 0.00010082 |



|          |                 |                |            |            |            |            |            |            |
|----------|-----------------|----------------|------------|------------|------------|------------|------------|------------|
| HCLS1    | ENSG00000180353 | protein_coding | 4429.30871 | 1.89481418 | 0.09325077 | 20.3195549 | 8.6356E-92 | 9.3144E-90 |
| DEFB124  | ENSG00000180383 | protein_coding | 2.56412242 | 1.21578227 | 0.25324265 | 4.80085899 | 1.5799E-06 | 3.5473E-06 |
| ARHGAP45 | ENSG00000180448 | protein_coding | 2541.67295 | 1.48657007 | 0.09126308 | 16.2888438 | 1.1845E-59 | 3.9749E-58 |
| OR10Q1   | ENSG00000180475 | protein_coding | 4.94049368 | 4.73660114 | 0.34755318 | 13.6284214 | 2.7139E-42 | 4.6647E-41 |
| ZSCAN4   | ENSG00000180532 | protein_coding | 10.3255979 | 1.64752032 | 0.19200137 | 8.58077367 | 9.4237E-18 | 4.8181E-17 |
| BHLHA15  | ENSG00000180535 | protein_coding | 50.358212  | 2.42020884 | 0.19147475 | 12.6398327 | 1.2732E-36 | 1.7299E-35 |
| FUT7     | ENSG00000180549 | protein_coding | 26.634404  | 1.80676032 | 0.15559401 | 11.6120174 | 3.5807E-31 | 3.7475E-30 |
| H2BC4    | ENSG00000180596 | protein_coding | 255.148335 | 1.06510252 | 0.15723218 | 6.77407472 | 1.252E-11  | 4.2584E-11 |
| GSX2     | ENSG00000180613 | protein_coding | 1.85030706 | 1.38377861 | 0.43380997 | 3.18982665 | 0.00142358 | 0.00236161 |
| PRF1     | ENSG00000180644 | protein_coding | 1398.55213 | 2.62478836 | 0.13080492 | 20.0664338 | 1.4505E-89 | 1.4392E-87 |
| OR2A4    | ENSG00000180658 | protein_coding | 65.5615048 | 6.92103855 | 0.31243735 | 22.1517641 | 1.003E-108 | 2.044E-106 |
| C3orf22  | ENSG00000180697 | protein_coding | 4.40708561 | 3.08194483 | 0.26917894 | 11.4494277 | 2.367E-30  | 2.3848E-29 |
| OR10K2   | ENSG00000180708 | protein_coding | 1.07179852 | 1.33048254 | 0.41214996 | 3.22815157 | 0.00124593 | 0.00208167 |
| S1PR5    | ENSG00000180739 | protein_coding | 232.89009  | 2.38912873 | 0.12958887 | 18.4362181 | 6.7286E-76 | 4.0532E-74 |
| CLRN3    | ENSG00000180745 | protein_coding | 2271.89497 | 1.4569609  | 0.18655033 | 7.81001528 | 5.7181E-15 | 2.4514E-14 |
| CHST13   | ENSG00000180767 | protein_coding | 602.071902 | 1.98697739 | 0.17463986 | 11.3775706 | 5.4085E-30 | 5.3538E-29 |
| OR51E1   | ENSG00000180785 | protein_coding | 465.618188 | 2.48466926 | 0.14387567 | 17.2695578 | 7.9751E-67 | 3.4103E-65 |
| MAP6D1   | ENSG00000180834 | protein_coding | 114.614268 | 1.09955093 | 0.11270413 | 9.75608378 | 1.7373E-22 | 1.1578E-21 |
| LSMEM1   | ENSG00000181016 | protein_coding | 121.159484 | 1.85369022 | 0.14011852 | 13.2294447 | 5.9324E-40 | 9.2123E-39 |
| OR56B2P  | ENSG00000181017 | protein_coding | 0.33486675 | 1.02510921 | 0.43023704 | 2.38266144 | 0.01718799 | 0.02488362 |
| OR56B1   | ENSG00000181023 | protein_coding | 1.30700945 | 2.74828468 | 0.35096176 | 7.83072395 | 4.8507E-15 | 2.0888E-14 |
| AEN      | ENSG00000181026 | protein_coding | 2074.77007 | 1.39055838 | 0.07044151 | 19.7406087 | 9.6607E-87 | 8.5992E-85 |
| FCRL6    | ENSG00000181036 | protein_coding | 154.709302 | 2.48826166 | 0.13808237 | 18.0201255 | 1.3544E-72 | 7.1609E-71 |
| OR52N4   | ENSG00000181074 | protein_coding | 21.9089754 | 2.5330378  | 0.19057067 | 13.2918554 | 2.581E-40  | 4.0826E-39 |
| MAPK15   | ENSG00000181085 | protein_coding | 627.091123 | 1.92435974 | 0.17911888 | 10.7434778 | 6.3602E-27 | 5.4093E-26 |

|          |                 |                |            |            |            |            |            |            |
|----------|-----------------|----------------|------------|------------|------------|------------|------------|------------|
| MUC16    | ENSG00000181143 | protein_coding | 39.6548125 | 3.13654575 | 0.24301502 | 12.9067981 | 4.1208E-38 | 5.9628E-37 |
| C4orf50  | ENSG00000181215 | protein_coding | 9.58920961 | 2.48579485 | 0.21641649 | 11.4861618 | 1.5484E-30 | 1.5745E-29 |
| H2AW     | ENSG00000181218 | protein_coding | 163.187321 | 1.49439716 | 0.19573287 | 7.6348808  | 2.2603E-14 | 9.2986E-14 |
| SLC25A41 | ENSG00000181240 | protein_coding | 14.6395563 | 1.05370161 | 0.16898669 | 6.23541169 | 4.5059E-10 | 1.369E-09  |
| OR5AK2   | ENSG00000181273 | protein_coding | 0.52827616 | 1.05056793 | 0.48595422 | 2.16186603 | 0.0306285  | 0.04273838 |
| SPEM1    | ENSG00000181323 | protein_coding | 0.37692755 | 1.23606501 | 0.37962391 | 3.25602521 | 0.00112984 | 0.00189579 |
| AATK     | ENSG00000181409 | protein_coding | 305.754296 | 1.37342748 | 0.10807071 | 12.708601  | 5.2974E-37 | 7.3144E-36 |
| SAGE1    | ENSG00000181433 | protein_coding | 3.82042858 | 3.62204124 | 0.38726824 | 9.35279708 | 8.536E-21  | 5.2014E-20 |
| TMEM45A  | ENSG00000181458 | protein_coding | 2555.23628 | 3.48682645 | 0.1888928  | 18.4592877 | 4.3909E-76 | 2.6767E-74 |
| RAP2B    | ENSG00000181467 | protein_coding | 2695.33568 | 1.17713945 | 0.07766109 | 15.15739   | 6.7707E-52 | 1.7349E-50 |
| C6orf223 | ENSG00000181577 | protein_coding | 2939.26385 | 3.4949202  | 0.17641406 | 19.8108943 | 2.3979E-87 | 2.181E-85  |
| OR52D1   | ENSG00000181609 | protein_coding | 0.71641427 | 1.51830203 | 0.45998986 | 3.30072934 | 0.00096434 | 0.00163069 |
| OR52H1   | ENSG00000181616 | protein_coding | 0.89231121 | 2.07200604 | 0.44874276 | 4.61735816 | 3.8866E-06 | 8.4155E-06 |
| FDCSP    | ENSG00000181617 | protein_coding | 44.2889492 | 5.1530507  | 0.56626344 | 9.10009422 | 9.0254E-20 | 5.1957E-19 |
| SLX1B    | ENSG00000181625 | protein_coding | 2.44936326 | 2.4400519  | 0.30446624 | 8.01419521 | 1.1086E-15 | 4.9779E-15 |
| ANKRD62  | ENSG00000181626 | protein_coding | 2.06840014 | 2.23406347 | 0.3475904  | 6.42728758 | 1.299E-10  | 4.1E-10    |
| P2RY13   | ENSG00000181631 | protein_coding | 499.37396  | 1.67723944 | 0.13140433 | 12.7639588 | 2.6061E-37 | 3.6512E-36 |
| ATG9B    | ENSG00000181652 | protein_coding | 282.84206  | 2.92493162 | 0.19689727 | 14.855115  | 6.4457E-50 | 1.5239E-48 |
| ODF3L2   | ENSG00000181781 | protein_coding | 16.6943741 | 1.17294798 | 0.14240014 | 8.2369861  | 1.766E-16  | 8.3357E-16 |
| OR6S1    | ENSG00000181803 | protein_coding | 0.68667697 | 2.06462051 | 0.55165837 | 3.74257083 | 0.00018215 | 0.00033358 |
| SLC9A9   | ENSG00000181804 | protein_coding | 1383.19045 | 1.79617999 | 0.12450939 | 14.4260604 | 3.5478E-47 | 7.4739E-46 |
| TIGIT    | ENSG00000181847 | protein_coding | 381.544233 | 2.87866961 | 0.17675451 | 16.2862584 | 1.2356E-59 | 4.1405E-58 |
| OR4C6    | ENSG00000181903 | protein_coding | 1.08439261 | 1.55715851 | 0.66142268 | 2.3542563  | 0.01855981 | 0.02673455 |
| CHST15   | ENSG00000182022 | protein_coding | 5530.62482 | 1.67103489 | 0.12285799 | 13.6013532 | 3.9309E-42 | 6.6913E-41 |
| ZNF716   | ENSG00000182111 | protein_coding | 1.31647599 | 2.35964188 | 0.41830811 | 5.64091828 | 1.6915E-08 | 4.5112E-08 |

|           |                 |                |            |            |            |            |            |            |
|-----------|-----------------|----------------|------------|------------|------------|------------|------------|------------|
| P2RY8     | ENSG00000182162 | protein_coding | 1760.101   | 1.8299709  | 0.114215   | 16.0221597 | 8.9487E-58 | 2.8213E-56 |
| SHISAL2A  | ENSG00000182183 | protein_coding | 57.9422747 | 1.7956996  | 0.1354243  | 13.2598034 | 3.9593E-40 | 6.2051E-39 |
| ARL6IP4   | ENSG00000182196 | protein_coding | 129.474132 | 1.64959671 | 0.13367559 | 12.3402987 | 5.4952E-35 | 6.9034E-34 |
| SHMT2     | ENSG00000182199 | protein_coding | 11866.6969 | 1.92962612 | 0.08643548 | 22.324467  | 2.138E-110 | 4.58E-108  |
| SYNM      | ENSG00000182253 | protein_coding | 2495.58027 | 1.05681685 | 0.08500392 | 12.4325663 | 1.7396E-35 | 2.2457E-34 |
| IZUMO1    | ENSG00000182264 | protein_coding | 18.6046175 | 1.59141073 | 0.18810853 | 8.46006703 | 2.6722E-17 | 1.3302E-16 |
| B4GALNT4  | ENSG00000182272 | protein_coding | 172.060104 | 3.18355058 | 0.28649326 | 11.1121306 | 1.0951E-28 | 1.0191E-27 |
| DCAF4L1   | ENSG00000182308 | protein_coding | 20.691486  | 1.14552132 | 0.15479213 | 7.40038476 | 1.3579E-13 | 5.3076E-13 |
| KCNJ14    | ENSG00000182324 | protein_coding | 96.8778031 | 1.31418289 | 0.11500525 | 11.4271558 | 3.0597E-30 | 3.0631E-29 |
| FBXL6     | ENSG00000182325 | protein_coding | 661.330937 | 1.11467103 | 0.09830851 | 11.3384998 | 8.4582E-30 | 8.3133E-29 |
| C1S       | ENSG00000182326 | protein_coding | 21749.8275 | 1.3362689  | 0.17850101 | 7.4860578  | 7.0973E-14 | 2.8306E-13 |
| KIAA2012  | ENSG00000182329 | protein_coding | 5.77162293 | 1.30900237 | 0.21598361 | 6.06065602 | 1.3557E-09 | 3.9576E-09 |
| DAOA      | ENSG00000182346 | protein_coding | 0.46010002 | 1.45100595 | 0.51618777 | 2.81100413 | 0.00493872 | 0.00769111 |
| NXPH4     | ENSG00000182379 | protein_coding | 1309.05862 | 4.53115265 | 0.18456856 | 24.5499706 | 4.328E-133 | 1.804E-130 |
| IFNL1     | ENSG00000182393 | protein_coding | 2.70292035 | 2.59602257 | 0.32499275 | 7.98793987 | 1.3721E-15 | 6.1365E-15 |
| KCNK4     | ENSG00000182450 | protein_coding | 0.6852168  | 1.44954376 | 0.39067697 | 3.71033842 | 0.00020698 | 0.00037664 |
| TEX19     | ENSG00000182459 | protein_coding | 3.46546806 | 2.16252244 | 0.38852222 | 5.56602    | 2.6062E-08 | 6.8325E-08 |
| CAPN12    | ENSG00000182472 | protein_coding | 1580.31436 | 3.13063386 | 0.16287818 | 19.2207073 | 2.4836E-82 | 1.8695E-80 |
| BGN       | ENSG00000182492 | protein_coding | 57134.5622 | 1.07531236 | 0.14046097 | 7.65559528 | 1.9242E-14 | 7.9501E-14 |
| TBPL2     | ENSG00000182521 | protein_coding | 1.49159092 | 2.28886865 | 0.35134134 | 6.51465791 | 7.2856E-11 | 2.345E-10  |
| RNASE10   | ENSG00000182545 | protein_coding | 8.9891586  | 2.33081056 | 0.1869043  | 12.4706095 | 1.08E-35   | 1.4044E-34 |
| CSF1R     | ENSG00000182578 | protein_coding | 6263.63778 | 1.59712046 | 0.11885484 | 13.437572  | 3.6419E-41 | 5.9582E-40 |
| VCX       | ENSG00000182583 | protein_coding | 1.94805949 | 1.91233655 | 0.31684544 | 6.03555021 | 1.5842E-09 | 4.6004E-09 |
| KRTAP11-1 | ENSG00000182591 | protein_coding | 0.3987279  | 1.26264754 | 0.50971474 | 2.47716505 | 0.01324306 | 0.01947002 |
| SNORC     | ENSG00000182600 | protein_coding | 140.1679   | 1.72064083 | 0.16913912 | 10.1729325 | 2.619E-24  | 1.9293E-23 |

|         |                 |                |            |            |            |            |            |            |
|---------|-----------------|----------------|------------|------------|------------|------------|------------|------------|
| NTM     | ENSG00000182667 | protein_coding | 814.610652 | 1.74756575 | 0.19365092 | 9.02430915 | 1.8083E-19 | 1.0238E-18 |
| PPP1R27 | ENSG00000182676 | protein_coding | 3.70326142 | 1.26531838 | 0.27849227 | 4.54345965 | 5.5338E-06 | 1.1808E-05 |
| BRICD5  | ENSG00000182685 | protein_coding | 124.704469 | 1.09144097 | 0.1549174  | 7.04530902 | 1.8505E-12 | 6.6831E-12 |
| GRID1   | ENSG00000182771 | protein_coding | 215.030594 | 1.47664739 | 0.16306247 | 9.05571593 | 1.3567E-19 | 7.7434E-19 |
| MAGEB17 | ENSG00000182798 | protein_coding | 5.99063313 | 1.68449679 | 0.21949207 | 7.67452226 | 1.6604E-14 | 6.8918E-14 |
| LCK     | ENSG00000182866 | protein_coding | 875.391362 | 1.28879554 | 0.1429253  | 9.0172666  | 1.9284E-19 | 1.0901E-18 |
| ADGRG3  | ENSG00000182885 | protein_coding | 61.3145098 | 1.56264137 | 0.17553767 | 8.90202867 | 5.4835E-19 | 3.022E-18  |
| WFDC10B | ENSG00000182931 | protein_coding | 7.76787381 | 3.68801728 | 0.35740193 | 10.318963  | 5.7845E-25 | 4.4069E-24 |
| ODF3L1  | ENSG00000182950 | protein_coding | 32.0723276 | 1.01257271 | 0.14785385 | 6.84847035 | 7.4644E-12 | 2.5813E-11 |
| GJC1    | ENSG00000182963 | protein_coding | 2185.49158 | 2.73478396 | 0.11849341 | 23.0796283 | 7.417E-118 | 1.91E-115  |
| SOX1    | ENSG00000182968 | protein_coding | 4.81180105 | 4.17301166 | 0.53701264 | 7.77078846 | 7.7999E-15 | 3.3101E-14 |
| ZNF320  | ENSG00000182986 | protein_coding | 3571.49079 | 1.12647973 | 0.09763508 | 11.537654  | 8.5218E-31 | 8.7413E-30 |
| PYCR1   | ENSG00000183010 | protein_coding | 537.254765 | 1.70968766 | 0.18054605 | 9.4695378  | 2.8108E-21 | 1.7603E-20 |
| MCEMP1  | ENSG00000183019 | protein_coding | 30.7084986 | 2.03272729 | 0.20078916 | 10.1236905 | 4.3375E-24 | 3.1521E-23 |
| OR1G1   | ENSG00000183024 | protein_coding | 0.83528767 | 2.30311305 | 0.35388508 | 6.50808176 | 7.6116E-11 | 2.4474E-10 |
| OTOP2   | ENSG00000183034 | protein_coding | 1.61822713 | 1.37608    | 0.30251149 | 4.54885195 | 5.3939E-06 | 1.152E-05  |
| CAMK1D  | ENSG00000183049 | protein_coding | 1686.85078 | 1.2739117  | 0.07858176 | 16.2112899 | 4.1967E-59 | 1.382E-57  |
| NKX2-5  | ENSG00000183072 | protein_coding | 6.03472225 | 4.37441218 | 0.4786537  | 9.13899163 | 6.3037E-20 | 3.6671E-19 |
| NEB     | ENSG00000183091 | protein_coding | 1056.16217 | 1.58296599 | 0.25616083 | 6.17957871 | 6.4273E-10 | 1.9272E-09 |
| GPR19   | ENSG00000183150 | protein_coding | 31.2434327 | 2.2134159  | 0.13601676 | 16.2731117 | 1.5317E-59 | 5.1178E-58 |
| C2CD4C  | ENSG00000183186 | protein_coding | 123.805978 | 1.42107626 | 0.15044391 | 9.44588747 | 3.5241E-21 | 2.1928E-20 |
| POTEC   | ENSG00000183206 | protein_coding | 0.6074518  | 1.61417807 | 0.46591447 | 3.46453735 | 0.00053114 | 0.00092392 |
| RIMBP3C | ENSG00000183246 | protein_coding | 2.78098962 | 2.6124171  | 0.27493224 | 9.50203974 | 2.0582E-21 | 1.2985E-20 |
| DDX41   | ENSG00000183258 | protein_coding | 6266.31503 | 1.03197161 | 0.0725449  | 14.2252823 | 6.3846E-46 | 1.2747E-44 |
| OR52E8  | ENSG00000183269 | protein_coding | 5.07301811 | 1.48918062 | 0.59151828 | 2.51755638 | 0.01181721 | 0.0175017  |

|           |                 |                |            |            |            |            |            |            |
|-----------|-----------------|----------------|------------|------------|------------|------------|------------|------------|
| CCDC60    | ENSG00000183273 | protein_coding | 10.5477191 | 1.72965621 | 0.22362735 | 7.734547   | 1.0377E-14 | 4.3714E-14 |
| FAM9A     | ENSG00000183304 | protein_coding | 1.9765878  | 3.39553636 | 0.41895606 | 8.10475535 | 5.2852E-16 | 2.4201E-15 |
| TMEM121B  | ENSG00000183307 | protein_coding | 68.9708378 | 1.47439545 | 0.11662585 | 12.6420987 | 1.2371E-36 | 1.6832E-35 |
| OR2T34    | ENSG00000183310 | protein_coding | 0.50334872 | 1.06115066 | 0.45216998 | 2.34679592 | 0.01893562 | 0.02724336 |
| EPHA10    | ENSG00000183317 | protein_coding | 88.8645762 | 1.34011505 | 0.28158758 | 4.75914124 | 1.9442E-06 | 4.3291E-06 |
| SPDYE4    | ENSG00000183318 | protein_coding | 1.41469008 | 1.31080335 | 0.29813154 | 4.39672814 | 1.0989E-05 | 2.2786E-05 |
| REC114    | ENSG00000183324 | protein_coding | 2.82018106 | 1.03681808 | 0.25144059 | 4.12351115 | 3.7314E-05 | 7.3517E-05 |
| GBP6      | ENSG00000183347 | protein_coding | 14.1946082 | 1.72385934 | 0.17570115 | 9.81131522 | 1.0065E-22 | 6.803E-22  |
| PMCH      | ENSG00000183395 | protein_coding | 12.8139203 | 4.8627551  | 0.33260696 | 14.6201245 | 2.0902E-48 | 4.6535E-47 |
| NPIPA1    | ENSG00000183426 | protein_coding | 220.159573 | 1.72606115 | 0.13138588 | 13.1373414 | 2.0117E-39 | 3.0689E-38 |
| GRIN2A    | ENSG00000183454 | protein_coding | 887.417369 | 1.60787235 | 0.24743718 | 6.49810319 | 8.1339E-11 | 2.6089E-10 |
| TREX2     | ENSG00000183479 | protein_coding | 182.823784 | 2.63692459 | 0.20813765 | 12.669138  | 8.7673E-37 | 1.2008E-35 |
| MEX3B     | ENSG00000183496 | protein_coding | 172.649987 | 1.17245982 | 0.11384394 | 10.2988335 | 7.1321E-25 | 5.4069E-24 |
| KLRC4     | ENSG00000183542 | protein_coding | 7.91060669 | 2.3278298  | 0.22423499 | 10.3812067 | 3.0193E-25 | 2.3443E-24 |
| C10orf120 | ENSG00000183559 | protein_coding | 0.65529599 | 1.42618041 | 0.59949921 | 2.37895295 | 0.01736189 | 0.02512268 |
| GKN2      | ENSG00000183607 | protein_coding | 0.622795   | 1.43758964 | 0.39356414 | 3.65274549 | 0.00025945 | 0.00046702 |
| CCR3      | ENSG00000183625 | protein_coding | 9.27341432 | 1.09650994 | 0.18707538 | 5.86132697 | 4.5918E-09 | 1.2835E-08 |
| C11orf88  | ENSG00000183644 | protein_coding | 11.1626299 | 1.61960779 | 0.14875746 | 10.8875735 | 1.3211E-27 | 1.1618E-26 |
| BMP8A     | ENSG00000183682 | protein_coding | 51.239543  | 1.4103506  | 0.14152641 | 9.96528224 | 2.1626E-23 | 1.5128E-22 |
| RFLNB     | ENSG00000183688 | protein_coding | 3122.41582 | 1.44381172 | 0.11597242 | 12.4496123 | 1.4053E-35 | 1.8208E-34 |
| NOG       | ENSG00000183691 | protein_coding | 137.279836 | 2.51359937 | 0.26983085 | 9.31546314 | 1.2142E-20 | 7.3422E-20 |
| IFNL2     | ENSG00000183709 | protein_coding | 0.58302214 | 1.73338987 | 0.44536389 | 3.89207544 | 9.939E-05  | 0.00018719 |
| TRIM52    | ENSG00000183718 | protein_coding | 1149.00249 | 1.08536229 | 0.08662959 | 12.5287709 | 5.1962E-36 | 6.8586E-35 |
| FIGLA     | ENSG00000183733 | protein_coding | 1.1052286  | 2.02248887 | 0.3375078  | 5.99242119 | 2.0674E-09 | 5.9496E-09 |
| CHEK2     | ENSG00000183765 | protein_coding | 370.434142 | 1.21311495 | 0.08725047 | 13.9038221 | 6.0047E-44 | 1.1081E-42 |

|            |                 |                |            |            |            |            |            |            |
|------------|-----------------|----------------|------------|------------|------------|------------|------------|------------|
| FOXL2      | ENSG00000183770 | protein_coding | 2.95180319 | 1.55289226 | 0.26019429 | 5.96820272 | 2.3988E-09 | 6.868E-09  |
| SLC35F3    | ENSG00000183780 | protein_coding | 140.512322 | 1.2597984  | 0.22050899 | 5.71313848 | 1.1091E-08 | 2.9996E-08 |
| TUBA8      | ENSG00000183785 | protein_coding | 17.4251126 | 1.4104771  | 0.13863339 | 10.1741517 | 2.5864E-24 | 1.9056E-23 |
| NPIPA5     | ENSG00000183793 | protein_coding | 65.7206384 | 1.27562755 | 0.18309877 | 6.96688228 | 3.2404E-12 | 1.1492E-11 |
| CCR4       | ENSG00000183813 | protein_coding | 167.934019 | 1.41483249 | 0.15810379 | 8.94875775 | 3.5951E-19 | 2.0017E-18 |
| PNMA3      | ENSG00000183837 | protein_coding | 466.206181 | 1.41614163 | 0.20722825 | 6.83372858 | 8.2735E-12 | 2.8521E-11 |
| IQGAP3     | ENSG00000183856 | protein_coding | 512.26799  | 2.47092367 | 0.14564279 | 16.9656437 | 1.4747E-64 | 5.8229E-63 |
| AC138969.1 | ENSG00000183889 | protein_coding | 28.0736853 | 1.70167771 | 0.16020351 | 10.6219756 | 2.3552E-26 | 1.9422E-25 |
| SH2D1A     | ENSG00000183918 | protein_coding | 270.945382 | 2.46234468 | 0.16382313 | 15.030507  | 4.6344E-51 | 1.1404E-49 |
| KCNH8      | ENSG00000183960 | protein_coding | 23.4387429 | 1.27521617 | 0.24095624 | 5.29231433 | 1.2078E-07 | 2.9966E-07 |
| ADAP2      | ENSG00000184060 | protein_coding | 1430.05733 | 1.83722897 | 0.08706944 | 21.1007327 | 7.831E-99  | 1.1149E-96 |
| TRIML1     | ENSG00000184108 | protein_coding | 1.704336   | 2.04923355 | 0.34492059 | 5.94117491 | 2.8299E-09 | 8.0499E-09 |
| TSPYL2     | ENSG00000184205 | protein_coding | 2475.13986 | 1.15832831 | 0.1106612  | 10.4673395 | 1.2202E-25 | 9.6928E-25 |
| GOLGA6L4   | ENSG00000184206 | protein_coding | 10.1012819 | 1.69226984 | 0.19501011 | 8.6778571  | 4.033E-18  | 2.1116E-17 |
| DGAT2L6    | ENSG00000184210 | protein_coding | 1.4063253  | 1.76641063 | 0.31660377 | 5.57924693 | 2.4156E-08 | 6.3509E-08 |
| DEFB108B   | ENSG00000184276 | protein_coding | 0.75352864 | 1.64276118 | 0.4065688  | 4.04054909 | 5.3326E-05 | 0.00010332 |
| CLECL1     | ENSG00000184293 | protein_coding | 51.3118568 | 2.29951043 | 0.15528567 | 14.808259  | 1.2955E-49 | 3.0162E-48 |
| SRPK3      | ENSG00000184343 | protein_coding | 37.8827602 | 1.07549393 | 0.17009827 | 6.32277982 | 2.569E-10  | 7.9319E-10 |
| H1-5       | ENSG00000184357 | protein_coding | 2.43048338 | 2.73030748 | 0.42695489 | 6.39483825 | 1.6072E-10 | 5.0396E-10 |
| MAP7D2     | ENSG00000184368 | protein_coding | 2047.87897 | 2.37915468 | 0.24770283 | 9.60487482 | 7.6251E-22 | 4.9273E-21 |
| CSF1       | ENSG00000184371 | protein_coding | 4232.30251 | 1.00500803 | 0.08967249 | 11.20754   | 3.7446E-29 | 3.5739E-28 |
| PLA2G6     | ENSG00000184381 | protein_coding | 836.250268 | 1.24645461 | 0.13458524 | 9.26145097 | 2.0167E-20 | 1.2033E-19 |
| A3GALT2    | ENSG00000184389 | protein_coding | 5.68774293 | 2.2806903  | 0.23037131 | 9.90006204 | 4.1602E-23 | 2.8665E-22 |
| KCND2      | ENSG00000184408 | protein_coding | 38.6853633 | 1.36355741 | 0.2469246  | 5.52216116 | 3.3486E-08 | 8.7033E-08 |
| KNTC1      | ENSG00000184445 | protein_coding | 982.106204 | 1.18476378 | 0.08938563 | 13.2545217 | 4.2482E-40 | 6.6396E-39 |



|           |                 |                |            |            |            |            |            |            |
|-----------|-----------------|----------------|------------|------------|------------|------------|------------|------------|
| CCR10     | ENSG00000184451 | protein_coding | 87.8996555 | 1.68928112 | 0.13951441 | 12.1082916 | 9.5462E-34 | 1.1319E-32 |
| WDR27     | ENSG00000184465 | protein_coding | 753.369521 | 1.31489876 | 0.12698122 | 10.3550649 | 3.9692E-25 | 3.0575E-24 |
| PTP4A3    | ENSG00000184489 | protein_coding | 3185.21117 | 1.87713779 | 0.10421008 | 18.0130152 | 1.5401E-72 | 8.1334E-71 |
| TMEM255B  | ENSG00000184497 | protein_coding | 1076.06583 | 1.50700576 | 0.10709238 | 14.0720168 | 5.6437E-45 | 1.0829E-43 |
| PROS1     | ENSG00000184500 | protein_coding | 9027.58574 | 1.12281926 | 0.1232036  | 9.11352628 | 7.9747E-20 | 4.6128E-19 |
| NUTM1     | ENSG00000184507 | protein_coding | 2.3662751  | 1.87713801 | 0.33655963 | 5.57743076 | 2.441E-08  | 6.4142E-08 |
| DHRS7C    | ENSG00000184544 | protein_coding | 1.12569417 | 1.17980328 | 0.31758418 | 3.71493085 | 0.00020326 | 0.0003703  |
| SPEM2     | ENSG00000184560 | protein_coding | 3.03941114 | 3.64565241 | 0.30533509 | 11.9398408 | 7.3363E-33 | 8.3368E-32 |
| SLITRK6   | ENSG00000184564 | protein_coding | 37.972897  | 1.40149582 | 0.32047196 | 4.3732245  | 1.2242E-05 | 2.5261E-05 |
| PIWIL3    | ENSG00000184571 | protein_coding | 2.69357191 | 1.84689555 | 0.31426385 | 5.87689474 | 4.1803E-09 | 1.1722E-08 |
| LPAR5     | ENSG00000184574 | protein_coding | 419.565939 | 2.14864249 | 0.1222882  | 17.5703169 | 4.1584E-69 | 1.9333E-67 |
| STING1    | ENSG00000184584 | protein_coding | 3962.85482 | 1.02915539 | 0.08605276 | 11.9595864 | 5.7849E-33 | 6.6082E-32 |
| C14orf180 | ENSG00000184601 | protein_coding | 168.767861 | 2.4355162  | 0.31775899 | 7.66466503 | 1.793E-14  | 7.4214E-14 |
| NELL2     | ENSG00000184613 | protein_coding | 234.114382 | 1.36628204 | 0.17037148 | 8.01942945 | 1.0624E-15 | 4.775E-15  |
| ODF4      | ENSG00000184650 | protein_coding | 1.32329383 | 1.29673187 | 0.37725906 | 3.4372451  | 0.00058766 | 0.00101734 |
| FOXD4L4   | ENSG00000184659 | protein_coding | 1.07413044 | 1.36058766 | 0.30800252 | 4.41745633 | 9.9869E-06 | 2.0794E-05 |
| CDCA2     | ENSG00000184661 | protein_coding | 1171.81235 | 4.68560384 | 0.15767483 | 29.7168795 | 4.648E-194 | 9.685E-191 |
| SEPTIN5   | ENSG00000184702 | protein_coding | 1056.81094 | 1.70245168 | 0.11258198 | 15.1218843 | 1.1617E-51 | 2.9357E-50 |
| LRRC26    | ENSG00000184709 | protein_coding | 1.68748278 | 1.64232799 | 0.45223348 | 3.63159312 | 0.00028168 | 0.0005049  |
| APOBR     | ENSG00000184730 | protein_coding | 713.444492 | 1.67870072 | 0.11815514 | 14.207598  | 8.2197E-46 | 1.6354E-44 |
| DDX53     | ENSG00000184735 | protein_coding | 0.68492657 | 1.58455707 | 0.46115526 | 3.43605982 | 0.00059024 | 0.00102145 |
| SMIM10    | ENSG00000184785 | protein_coding | 739.211018 | 1.05235771 | 0.09012435 | 11.6767304 | 1.6762E-31 | 1.7861E-30 |
| PRR16     | ENSG00000184838 | protein_coding | 186.415143 | 1.74183829 | 0.12618637 | 13.803696  | 2.4211E-43 | 4.3559E-42 |
| JAG2      | ENSG00000184916 | protein_coding | 2636.36834 | 1.65949029 | 0.1068571  | 15.5299955 | 2.1739E-54 | 6.0324E-53 |
| FMNL1     | ENSG00000184922 | protein_coding | 1945.86794 | 2.22931348 | 0.10795284 | 20.6508091 | 9.5999E-95 | 1.1735E-92 |

|         |                 |                |            |            |            |            |            |            |
|---------|-----------------|----------------|------------|------------|------------|------------|------------|------------|
| OR6A2   | ENSG00000184933 | protein_coding | 0.52380603 | 1.10986548 | 0.42173348 | 2.63167505 | 0.00849651 | 0.01284423 |
| RFX6    | ENSG00000185002 | protein_coding | 1.59218056 | 2.0286029  | 0.39130376 | 5.18421515 | 2.1693E-07 | 5.267E-07  |
| F8      | ENSG00000185010 | protein_coding | 5454.62304 | 1.03187636 | 0.15271607 | 6.75682898 | 1.4104E-11 | 4.7808E-11 |
| LRRC14B | ENSG00000185028 | protein_coding | 50.635326  | 3.02419537 | 0.28264324 | 10.6996911 | 1.0212E-26 | 8.5941E-26 |
| MROH2A  | ENSG00000185038 | protein_coding | 99.9934734 | 2.5409728  | 0.28290194 | 8.98181458 | 2.6634E-19 | 1.4933E-18 |
| SPDYE16 | ENSG00000185040 | protein_coding | 0.94837667 | 2.0307621  | 0.33365137 | 6.08647915 | 1.1542E-09 | 3.3899E-09 |
| ADSS1   | ENSG00000185100 | protein_coding | 4161.60228 | 2.44836779 | 0.16522354 | 14.8185166 | 1.1121E-49 | 2.6011E-48 |
| ANO9    | ENSG00000185101 | protein_coding | 1045.4128  | 1.67305981 | 0.17086437 | 9.7917419  | 1.2217E-22 | 8.2228E-22 |
| H2BC13  | ENSG00000185130 | protein_coding | 7.23299992 | 2.66079824 | 0.24526962 | 10.8484624 | 2.0281E-27 | 1.7665E-26 |
| MIXL1   | ENSG00000185155 | protein_coding | 13.0597138 | 1.62928565 | 0.2489596  | 6.54437769 | 5.9744E-11 | 1.9341E-10 |
| LRRC37B | ENSG00000185158 | protein_coding | 391.597543 | 1.03359394 | 0.06472619 | 15.9687121 | 2.111E-57  | 6.5518E-56 |
| NRBP2   | ENSG00000185189 | protein_coding | 2967.62157 | 1.47613621 | 0.12106981 | 12.1924385 | 3.4106E-34 | 4.1318E-33 |
| PRSS57  | ENSG00000185198 | protein_coding | 9.75751803 | 2.22274339 | 0.23246109 | 9.56178693 | 1.1574E-21 | 7.3978E-21 |
| TNFAIP2 | ENSG00000185215 | protein_coding | 5388.33796 | 1.27901347 | 0.11309935 | 11.3087605 | 1.1876E-29 | 1.1595E-28 |
| IL3RA   | ENSG00000185291 | protein_coding | 1244.33591 | 1.43617216 | 0.09797068 | 14.659203  | 1.1765E-48 | 2.6397E-47 |
| SPPL2C  | ENSG00000185294 | protein_coding | 0.93177491 | 2.32432669 | 0.3946492  | 5.88960199 | 3.8713E-09 | 1.0883E-08 |
| SCN10A  | ENSG00000185313 | protein_coding | 2.94396686 | 3.64314309 | 0.36268597 | 10.0448967 | 9.6749E-24 | 6.8996E-23 |
| TEDC1   | ENSG00000185347 | protein_coding | 288.174348 | 1.12476254 | 0.11002841 | 10.2224734 | 1.5728E-24 | 1.1729E-23 |
| MAPK11  | ENSG00000185386 | protein_coding | 947.529508 | 1.1958546  | 0.09795799 | 12.2078317 | 2.8231E-34 | 3.4328E-33 |
| KPNA7   | ENSG00000185467 | protein_coding | 9.39445136 | 3.38018541 | 0.26071087 | 12.9652648 | 1.9256E-38 | 2.813E-37  |
| KRT6B   | ENSG00000185479 | protein_coding | 7.53774668 | 3.21350784 | 0.50559052 | 6.35594956 | 2.0714E-10 | 6.4347E-10 |
| STAC3   | ENSG00000185482 | protein_coding | 237.688864 | 2.2721097  | 0.10377941 | 21.8936472 | 2.986E-106 | 5.611E-104 |
| IRF7    | ENSG00000185507 | protein_coding | 1535.68032 | 1.76046068 | 0.11711723 | 15.0316109 | 4.5579E-51 | 1.1221E-49 |
| LMNTD2  | ENSG00000185522 | protein_coding | 371.426175 | 1.9844418  | 0.14168509 | 14.006003  | 1.4324E-44 | 2.7067E-43 |
| AHNAK2  | ENSG00000185567 | protein_coding | 7246.38606 | 4.07212454 | 0.16655127 | 24.4496756 | 5.073E-132 | 2.04E-129  |

|          |                 |                |            |            |            |            |            |            |
|----------|-----------------|----------------|------------|------------|------------|------------|------------|------------|
| OLFML2A  | ENSG00000185585 | protein_coding | 8597.8716  | 2.66900898 | 0.12919529 | 20.6587167 | 8.1502E-95 | 1.0016E-92 |
| INKA1    | ENSG00000185614 | protein_coding | 278.385707 | 1.33281289 | 0.11828039 | 11.2682487 | 1.8828E-29 | 1.8224E-28 |
| PDIA2    | ENSG00000185615 | protein_coding | 10.2005555 | 1.54083171 | 0.26397276 | 5.8370861  | 5.3122E-09 | 1.4773E-08 |
| P4HB     | ENSG00000185624 | protein_coding | 58536.9235 | 1.39725254 | 0.08848163 | 15.7914427 | 3.5634E-56 | 1.0518E-54 |
| NDUFA4L2 | ENSG00000185633 | protein_coding | 84930.1467 | 5.79271586 | 0.17390575 | 33.3095137 | 2.812E-243 | 1.841E-239 |
| KRT79    | ENSG00000185640 | protein_coding | 2.00700742 | 1.76732635 | 0.41444364 | 4.26433457 | 2.005E-05  | 4.0528E-05 |
| SMIM23   | ENSG00000185662 | protein_coding | 1.9719774  | 3.1215474  | 0.36399864 | 8.57571167 | 9.8476E-18 | 5.0281E-17 |
| POU3F1   | ENSG00000185668 | protein_coding | 26.8222925 | 1.04288096 | 0.1564528  | 6.66578662 | 2.6325E-11 | 8.759E-11  |
| SNAI3    | ENSG00000185669 | protein_coding | 98.3203666 | 1.29626486 | 0.09739779 | 13.3089761 | 2.0528E-40 | 3.2595E-39 |
| LYG2     | ENSG00000185674 | protein_coding | 12.0970735 | 1.86585651 | 0.19687723 | 9.47725894 | 2.6105E-21 | 1.6379E-20 |
| PRAME    | ENSG00000185686 | protein_coding | 802.20281  | 2.78005586 | 0.29425963 | 9.44762913 | 3.4659E-21 | 2.1575E-20 |
| MYBL1    | ENSG00000185697 | protein_coding | 442.900581 | 1.75205916 | 0.11951907 | 14.6592442 | 1.1757E-48 | 2.6394E-47 |
| NRG3     | ENSG00000185737 | protein_coding | 335.071067 | 1.9429562  | 0.12269138 | 15.836127  | 1.7529E-56 | 5.228E-55  |
| KCNQ5    | ENSG00000185760 | protein_coding | 54.5538447 | 1.77683728 | 0.16800751 | 10.5759394 | 3.853E-26  | 3.1383E-25 |
| IKZF1    | ENSG00000185811 | protein_coding | 1434.32606 | 2.05986818 | 0.12734471 | 16.1755306 | 7.5048E-59 | 2.4486E-57 |
| EVI2B    | ENSG00000185862 | protein_coding | 1411.46207 | 1.93348917 | 0.12207984 | 15.8379065 | 1.704E-56  | 5.0855E-55 |
| NPIPB4   | ENSG00000185864 | protein_coding | 168.683076 | 1.98094478 | 0.13573708 | 14.593984  | 3.0675E-48 | 6.7604E-47 |
| PRSS38   | ENSG00000185888 | protein_coding | 1.50197537 | 2.35223855 | 0.51656318 | 4.55363188 | 5.2728E-06 | 1.1271E-05 |
| FFAR3    | ENSG00000185897 | protein_coding | 2.89557542 | 2.12558814 | 0.28791248 | 7.38275783 | 1.5504E-13 | 6.0355E-13 |
| TAS2R60  | ENSG00000185899 | protein_coding | 0.58788423 | 1.24085531 | 0.4022798  | 3.08455786 | 0.00203855 | 0.00332098 |
| C16orf54 | ENSG00000185905 | protein_coding | 277.770254 | 1.76364734 | 0.12783431 | 13.7963532 | 2.6807E-43 | 4.8116E-42 |
| C7orf61  | ENSG00000185955 | protein_coding | 16.662252  | 1.83675503 | 0.16493221 | 11.1364241 | 8.3401E-29 | 7.82E-28   |
| FAM186A  | ENSG00000185958 | protein_coding | 37.4290848 | 1.7662122  | 0.15573183 | 11.3413693 | 8.1854E-30 | 8.052E-29  |
| SHOX     | ENSG00000185960 | protein_coding | 3.4408904  | 1.8815017  | 0.29874814 | 6.29795292 | 3.016E-10  | 9.2697E-10 |
| CCIN     | ENSG00000185972 | protein_coding | 9.98976415 | 1.05853362 | 0.19011604 | 5.56782912 | 2.5793E-08 | 6.7654E-08 |

|         |                 |                |            |            |            |            |            |            |
|---------|-----------------|----------------|------------|------------|------------|------------|------------|------------|
| SLITRK2 | ENSG00000185985 | protein_coding | 324.535799 | 1.44451222 | 0.25919208 | 5.57313418 | 2.502E-08  | 6.5719E-08 |
| PLK5    | ENSG00000185988 | protein_coding | 5.36604654 | 1.78389704 | 0.39551187 | 4.51035019 | 6.4721E-06 | 1.3721E-05 |
| RASA3   | ENSG00000185989 | protein_coding | 2256.66484 | 1.38822523 | 0.07995618 | 17.3623248 | 1.5915E-67 | 6.9613E-66 |
| HTR3E   | ENSG00000186038 | protein_coding | 2.18027884 | 1.67358946 | 0.43284973 | 3.86644452 | 0.00011043 | 0.00020697 |
| DLEU7   | ENSG00000186047 | protein_coding | 55.9742097 | 1.68623648 | 0.14351641 | 11.7494332 | 7.1094E-32 | 7.7027E-31 |
| KRT73   | ENSG00000186049 | protein_coding | 2.67672137 | 2.35729837 | 0.29332745 | 8.03640562 | 9.2512E-16 | 4.1724E-15 |
| CD300LF | ENSG00000186074 | protein_coding | 294.179067 | 3.00307094 | 0.12843763 | 23.3815502 | 6.585E-121 | 1.875E-118 |
| ZBP2    | ENSG00000186075 | protein_coding | 1.06037262 | 1.48347571 | 0.40871765 | 3.62958561 | 0.00028388 | 0.00050865 |
| NBPF6   | ENSG00000186086 | protein_coding | 1.27042227 | 1.84756572 | 0.43661156 | 4.23160052 | 2.3203E-05 | 4.665E-05  |
| GSAP    | ENSG00000186088 | protein_coding | 2110.5434  | 1.18816675 | 0.08829563 | 13.4566886 | 2.8124E-41 | 4.6325E-40 |
| TAS2R42 | ENSG00000186136 | protein_coding | 1.13495025 | 1.58074579 | 0.35926429 | 4.39995237 | 1.0827E-05 | 2.2468E-05 |
| PRR30   | ENSG00000186143 | protein_coding | 1.47571684 | 2.32912613 | 0.56360032 | 4.13258486 | 3.5871E-05 | 7.0798E-05 |
| UBL4B   | ENSG00000186150 | protein_coding | 2.95045497 | 1.59714519 | 0.26812174 | 5.9567912  | 2.5724E-09 | 7.3434E-09 |
| CCDC84  | ENSG00000186166 | protein_coding | 876.504875 | 1.73818395 | 0.12571343 | 13.8265572 | 1.7626E-43 | 3.1949E-42 |
| KIF18B  | ENSG00000186185 | protein_coding | 167.261183 | 3.21844084 | 0.16783472 | 19.1762513 | 5.8445E-82 | 4.3283E-80 |
| FFAR4   | ENSG00000186188 | protein_coding | 99.0431227 | 2.76677466 | 0.16134004 | 17.1487164 | 6.4256E-66 | 2.6561E-64 |
| BPIFB4  | ENSG00000186191 | protein_coding | 2.25566192 | 1.16881903 | 0.45550084 | 2.5660085  | 0.01028763 | 0.01536792 |
| BTLA    | ENSG00000186265 | protein_coding | 66.2800839 | 1.41821862 | 0.16210523 | 8.74875312 | 2.1572E-18 | 1.1471E-17 |
| GPAT2   | ENSG00000186281 | protein_coding | 134.509797 | 1.37631105 | 0.13865798 | 9.92594218 | 3.2106E-23 | 2.2255E-22 |
| PRELID2 | ENSG00000186314 | protein_coding | 497.89799  | 2.06656241 | 0.10095367 | 20.4704044 | 3.9533E-93 | 4.5305E-91 |
| TMEM212 | ENSG00000186329 | protein_coding | 1.25147688 | 1.05102265 | 0.28350173 | 3.7072883  | 0.00020949 | 0.00038093 |
| SLC36A3 | ENSG00000186334 | protein_coding | 1.84458172 | 1.9964237  | 0.3305708  | 6.03932263 | 1.5476E-09 | 4.4984E-09 |
| THBS2   | ENSG00000186340 | protein_coding | 7779.44885 | 1.41507791 | 0.20051649 | 7.05716474 | 1.6993E-12 | 6.1576E-12 |
| ANKRD37 | ENSG00000186352 | protein_coding | 666.067397 | 1.31571683 | 0.09838672 | 13.372911  | 8.7066E-41 | 1.3984E-39 |
| CD300E  | ENSG00000186407 | protein_coding | 252.873941 | 1.08226146 | 0.14173925 | 7.63558072 | 2.248E-14  | 9.2499E-14 |

|          |                 |                |            |            |            |            |            |            |
|----------|-----------------|----------------|------------|------------|------------|------------|------------|------------|
| FCAR     | ENSG00000186431 | protein_coding | 24.4736978 | 1.09432655 | 0.19420696 | 5.63484715 | 1.7521E-08 | 4.6665E-08 |
| SPATA12  | ENSG00000186451 | protein_coding | 9.55857709 | 1.14185295 | 0.19351265 | 5.90066291 | 3.6204E-09 | 1.0209E-08 |
| BTN3A2   | ENSG00000186470 | protein_coding | 6885.20306 | 1.9836003  | 0.09850239 | 20.1375858 | 3.4579E-90 | 3.4933E-88 |
| KLK12    | ENSG00000186474 | protein_coding | 1.23941169 | 2.61721489 | 0.54404722 | 4.8106392  | 1.5045E-06 | 3.3854E-06 |
| MYT1L    | ENSG00000186487 | protein_coding | 3.77439071 | 1.06583022 | 0.27439193 | 3.88433511 | 0.00010261 | 0.00019301 |
| OR9Q1    | ENSG00000186509 | protein_coding | 8.18264896 | 3.28058694 | 0.28211717 | 11.6284553 | 2.9539E-31 | 3.1115E-30 |
| ARHGAP30 | ENSG00000186517 | protein_coding | 2072.32868 | 2.01487464 | 0.11143236 | 18.0815927 | 4.4504E-73 | 2.403E-71  |
| CYP4F8   | ENSG00000186526 | protein_coding | 1.1040564  | 1.28260527 | 0.35210076 | 3.64272228 | 0.00026977 | 0.00048471 |
| FSD2     | ENSG00000186628 | protein_coding | 13.5760088 | 1.32018307 | 0.18662649 | 7.07393168 | 1.506E-12  | 5.4788E-12 |
| SPDYE17  | ENSG00000186645 | protein_coding | 0.89521935 | 1.61644624 | 0.40598722 | 3.98151996 | 6.8476E-05 | 0.00013102 |
| CARMIL3  | ENSG00000186648 | protein_coding | 156.240153 | 1.22499694 | 0.15724328 | 7.79045645 | 6.6768E-15 | 2.8474E-14 |
| PRG2     | ENSG00000186652 | protein_coding | 5.99626021 | 3.08541983 | 0.26288513 | 11.7367607 | 8.259E-32  | 8.9313E-31 |
| CCDC73   | ENSG00000186714 | protein_coding | 42.944882  | 1.68300527 | 0.13242024 | 12.7095773 | 5.2316E-37 | 7.2258E-36 |
| MPPED1   | ENSG00000186732 | protein_coding | 3.49937095 | 1.52264447 | 0.28116053 | 5.41556976 | 6.1094E-08 | 1.5561E-07 |
| ZNF732   | ENSG00000186777 | protein_coding | 12.295471  | 1.21182582 | 0.15417214 | 7.86021253 | 3.8348E-15 | 1.6622E-14 |
| CXCR3    | ENSG00000186810 | protein_coding | 325.222834 | 3.15874931 | 0.17865118 | 17.6810993 | 5.8642E-70 | 2.8237E-68 |
| LILRB4   | ENSG00000186818 | protein_coding | 1297.62144 | 3.1086209  | 0.14565979 | 21.3416544 | 4.662E-101 | 7.293E-99  |
| TNFRSF4  | ENSG00000186827 | protein_coding | 496.057918 | 3.28884927 | 0.13756298 | 23.9079534 | 2.532E-126 | 8.533E-124 |
| KRT16    | ENSG00000186832 | protein_coding | 20.4703495 | 1.29187102 | 0.33847742 | 3.81671255 | 0.00013524 | 0.00025108 |
| KRT14    | ENSG00000186847 | protein_coding | 33.9065094 | 2.86448933 | 0.31884898 | 8.98384354 | 2.6147E-19 | 1.4667E-18 |
| TRABD2A  | ENSG00000186854 | protein_coding | 184.488789 | 1.65651593 | 0.1897334  | 8.73075546 | 2.5298E-18 | 1.3399E-17 |
| QRFPR    | ENSG00000186867 | protein_coding | 741.450987 | 2.91824279 | 0.16914042 | 17.2533735 | 1.0555E-66 | 4.4969E-65 |
| ERCC6L   | ENSG00000186871 | protein_coding | 56.6716745 | 1.79414209 | 0.1437842  | 12.4780196 | 9.8404E-36 | 1.2815E-34 |
| TNFRSF18 | ENSG00000186891 | protein_coding | 84.4414593 | 2.92666214 | 0.17065847 | 17.149235  | 6.3685E-66 | 2.6348E-64 |
| FGF3     | ENSG00000186895 | protein_coding | 0.63040857 | 1.8385592  | 0.52328645 | 3.51348519 | 0.00044227 | 0.00077631 |

|           |                 |                |            |            |            |            |            |            |
|-----------|-----------------|----------------|------------|------------|------------|------------|------------|------------|
| C1QL4     | ENSG00000186897 | protein_coding | 434.604943 | 3.03328458 | 0.27253268 | 11.1299847 | 8.9651E-29 | 8.3837E-28 |
| RTN4RL2   | ENSG00000186907 | protein_coding | 270.511925 | 1.03351566 | 0.15355674 | 6.73051329 | 1.6907E-11 | 5.6957E-11 |
| SERPINA11 | ENSG00000186910 | protein_coding | 2.21274346 | 2.6278088  | 0.4306696  | 6.10168165 | 1.0496E-09 | 3.0953E-09 |
| ZNF395    | ENSG00000186918 | protein_coding | 18426.0591 | 2.61689362 | 0.1023668  | 25.5638892 | 3.848E-144 | 2.125E-141 |
| FAM183A   | ENSG00000186973 | protein_coding | 69.9280144 | 1.76506877 | 0.199525   | 8.84635382 | 9.0425E-19 | 4.9242E-18 |
| RHD       | ENSG00000187010 | protein_coding | 49.1029287 | 1.31773708 | 0.18725182 | 7.03724597 | 1.9608E-12 | 7.0669E-12 |
| SAMD7     | ENSG00000187033 | protein_coding | 0.74185326 | 1.81185747 | 0.3925645  | 4.61543887 | 3.9227E-06 | 8.4908E-06 |
| GPR141    | ENSG00000187037 | protein_coding | 76.764249  | 2.30039689 | 0.15242357 | 15.0921338 | 1.8245E-51 | 4.5727E-50 |
| TMPRSS6   | ENSG00000187045 | protein_coding | 50.9879249 | 2.50437306 | 0.22355758 | 11.2023625 | 3.97E-29   | 3.7812E-28 |
| TMPRSS11A | ENSG00000187054 | protein_coding | 3.89450117 | 3.87860267 | 0.42469275 | 9.13272641 | 6.6796E-20 | 3.8818E-19 |
| TMEM262   | ENSG00000187066 | protein_coding | 65.7400029 | 1.55151971 | 0.11341621 | 13.6798764 | 1.3392E-42 | 2.3342E-41 |
| C3orf70   | ENSG00000187068 | protein_coding | 653.500626 | 1.49348294 | 0.11822226 | 12.6328408 | 1.3916E-36 | 1.8874E-35 |
| LILRA5    | ENSG00000187116 | protein_coding | 174.740418 | 1.24202762 | 0.13003822 | 9.55125058 | 1.2814E-21 | 8.1732E-21 |
| SLIT1     | ENSG00000187122 | protein_coding | 30.6986889 | 1.17684755 | 0.12363948 | 9.51838033 | 1.759E-21  | 1.1137E-20 |
| SPATA21   | ENSG00000187144 | protein_coding | 9.96313034 | 2.93244004 | 0.2766881  | 10.5983598 | 3.0325E-26 | 2.4833E-25 |
| KRT12     | ENSG00000187242 | protein_coding | 3.4133594  | 1.59948416 | 0.24298473 | 6.58265295 | 4.6213E-11 | 1.5097E-10 |
| FAM9C     | ENSG00000187268 | protein_coding | 9.35956538 | 2.09096201 | 0.19519226 | 10.7123204 | 8.91E-27   | 7.5165E-26 |
| CIDEC     | ENSG00000187288 | protein_coding | 39.550439  | 1.40825834 | 0.33154644 | 4.24754476 | 2.1613E-05 | 4.3564E-05 |
| FPR3      | ENSG00000187474 | protein_coding | 2031.05805 | 2.18961025 | 0.13630923 | 16.0635508 | 4.5948E-58 | 1.4627E-56 |
| H1-6      | ENSG00000187475 | protein_coding | 3.48844909 | 1.99984727 | 0.27172151 | 7.35991508 | 1.8403E-13 | 7.128E-13  |
| CDHR4     | ENSG00000187492 | protein_coding | 12.8569195 | 2.2573613  | 0.29651843 | 7.61288711 | 2.6804E-14 | 1.0969E-13 |
| COL4A1    | ENSG00000187498 | protein_coding | 75154.3229 | 1.86085238 | 0.11671903 | 15.9430078 | 3.1864E-57 | 9.823E-56  |
| GJA4      | ENSG00000187513 | protein_coding | 3426.89592 | 1.43110522 | 0.12156444 | 11.7724004 | 5.4161E-32 | 5.9114E-31 |
| PRR27     | ENSG00000187533 | protein_coding | 0.79950187 | 2.04428107 | 0.48882413 | 4.18203798 | 2.8891E-05 | 5.7539E-05 |
| FOXD4L3   | ENSG00000187559 | protein_coding | 0.51548185 | 1.38927366 | 0.32794166 | 4.2363439  | 2.2719E-05 | 4.5702E-05 |



|          |                 |                |            |            |            |            |            |            |
|----------|-----------------|----------------|------------|------------|------------|------------|------------|------------|
| DPPA3    | ENSG00000187569 | protein_coding | 0.85860064 | 2.12129473 | 0.49399798 | 4.2941364  | 1.7537E-05 | 3.5648E-05 |
| PLEKHN1  | ENSG00000187583 | protein_coding | 174.270499 | 2.46236846 | 0.14075086 | 17.494518  | 1.5774E-68 | 7.1879E-67 |
| TET3     | ENSG00000187605 | protein_coding | 1350.68189 | 1.00630353 | 0.06635449 | 15.1655673 | 5.978E-52  | 1.5395E-50 |
| ISG15    | ENSG00000187608 | protein_coding | 2005.06912 | 1.53867714 | 0.13150489 | 11.7005315 | 1.2666E-31 | 1.3582E-30 |
| RGPD1    | ENSG00000187627 | protein_coding | 3.54471449 | 1.07196241 | 0.25498085 | 4.2040899  | 2.6213E-05 | 5.2426E-05 |
| PERM1    | ENSG00000187642 | protein_coding | 404.393187 | 3.08270148 | 0.21651518 | 14.2378074 | 5.3376E-46 | 1.0694E-44 |
| SPRY4    | ENSG00000187678 | protein_coding | 6967.23516 | 1.26194559 | 0.10226267 | 12.3402367 | 5.4994E-35 | 6.9068E-34 |
| TRPV2    | ENSG00000187688 | protein_coding | 1329.83431 | 1.95121881 | 0.08231782 | 23.7034794 | 3.32E-124  | 1.057E-121 |
| EZHIP    | ENSG00000187690 | protein_coding | 5.83047299 | 1.89729385 | 0.26365262 | 7.1961881  | 6.1919E-13 | 2.3097E-12 |
| SLC18A3  | ENSG00000187714 | protein_coding | 64.3789207 | 7.65268682 | 0.57190054 | 13.3811498 | 7.7932E-41 | 1.2566E-39 |
| DNAJB13  | ENSG00000187726 | protein_coding | 210.514724 | 3.73127193 | 0.22659524 | 16.4666825 | 6.3668E-61 | 2.2195E-59 |
| GABRD    | ENSG00000187730 | protein_coding | 849.405824 | 5.25448286 | 0.16209548 | 32.4159734 | 1.635E-230 | 7.494E-227 |
| FANCA    | ENSG00000187741 | protein_coding | 333.932161 | 1.63845804 | 0.1155328  | 14.1817568 | 1.1883E-45 | 2.3521E-44 |
| OR52B6   | ENSG00000187747 | protein_coding | 1.29152464 | 1.84562426 | 0.35257594 | 5.23468573 | 1.6527E-07 | 4.0559E-07 |
| C9orf153 | ENSG00000187753 | protein_coding | 13.149371  | 1.81728871 | 0.15150441 | 11.9949555 | 3.7762E-33 | 4.357E-32  |
| LIN28B   | ENSG00000187772 | protein_coding | 0.86873917 | 2.24443878 | 0.71625811 | 3.13356141 | 0.00172699 | 0.00283798 |
| CARD9    | ENSG00000187796 | protein_coding | 263.697808 | 1.49512662 | 0.11835766 | 12.632276  | 1.4016E-36 | 1.9004E-35 |
| SOWAHD   | ENSG00000187808 | protein_coding | 93.5137101 | 1.06577085 | 0.13111828 | 8.1283161  | 4.3529E-16 | 2.0049E-15 |
| C2orf78  | ENSG00000187833 | protein_coding | 0.80173471 | 1.49987747 | 0.42515793 | 3.52781254 | 0.00041901 | 0.00073703 |
| PLSCR3   | ENSG00000187838 | protein_coding | 42.5484773 | 1.5666339  | 0.11105555 | 14.1067597 | 3.4507E-45 | 6.6886E-44 |
| EIF4EBP1 | ENSG00000187840 | protein_coding | 2422.74501 | 2.11772973 | 0.13257407 | 15.9739366 | 1.9414E-57 | 6.0294E-56 |
| TTC24    | ENSG00000187862 | protein_coding | 22.4513718 | 3.75515426 | 0.24617645 | 15.2539132 | 1.5506E-52 | 4.0686E-51 |
| SHISA7   | ENSG00000187902 | protein_coding | 4.00204116 | 1.33798985 | 0.20050744 | 6.67301852 | 2.5059E-11 | 8.3515E-11 |
| LRRC74B  | ENSG00000187905 | protein_coding | 2.82715805 | 2.1219341  | 0.3478801  | 6.09961326 | 1.0633E-09 | 3.134E-09  |
| CLEC17A  | ENSG00000187912 | protein_coding | 27.0060525 | 1.47277152 | 0.20094536 | 7.32921401 | 2.3151E-13 | 8.8904E-13 |

|          |                 |                |            |            |            |            |            |            |
|----------|-----------------|----------------|------------|------------|------------|------------|------------|------------|
| LDLRAD2  | ENSG00000187942 | protein_coding | 230.997699 | 1.14811284 | 0.11905601 | 9.64346815 | 5.2387E-22 | 3.4117E-21 |
| KLHL17   | ENSG00000187961 | protein_coding | 323.42176  | 1.11706801 | 0.11478628 | 9.73172028 | 2.2083E-22 | 1.4626E-21 |
| PLA2G2C  | ENSG00000187980 | protein_coding | 7.31447898 | 1.35691822 | 0.22761918 | 5.96135278 | 2.5016E-09 | 7.1498E-09 |
| TPRG1    | ENSG00000188001 | protein_coding | 156.864949 | 2.2669068  | 0.16481485 | 13.7542633 | 4.8015E-43 | 8.5378E-42 |
| RTP5     | ENSG00000188011 | protein_coding | 11.0621019 | 3.09205279 | 0.25253118 | 12.2442415 | 1.8036E-34 | 2.2094E-33 |
| S100A3   | ENSG00000188015 | protein_coding | 134.444092 | 1.05124749 | 0.13755726 | 7.64225379 | 2.1345E-14 | 8.7954E-14 |
| C19orf67 | ENSG00000188032 | protein_coding | 56.2595993 | 5.14673599 | 0.28067093 | 18.3372606 | 4.173E-75  | 2.4276E-73 |
| NRN1L    | ENSG00000188038 | protein_coding | 0.88930553 | 1.91662603 | 0.33247455 | 5.76473012 | 8.1789E-09 | 2.2362E-08 |
| ARL4C    | ENSG00000188042 | protein_coding | 5271.46639 | 1.57005256 | 0.15308707 | 10.255945  | 1.1128E-24 | 8.3724E-24 |
| TREML4   | ENSG00000188056 | protein_coding | 5.35012619 | 2.58335896 | 0.32380278 | 7.97818655 | 1.485E-15  | 6.6213E-15 |
| RAB42    | ENSG00000188060 | protein_coding | 1646.58632 | 4.86109651 | 0.20253328 | 24.0014699 | 2.684E-127 | 9.252E-125 |
| PLA2G4E  | ENSG00000188089 | protein_coding | 3.97583238 | 1.21133468 | 0.27139478 | 4.46336763 | 8.0681E-06 | 1.6941E-05 |
| FAM25A   | ENSG00000188100 | protein_coding | 0.95311423 | 1.84596441 | 0.61730459 | 2.99036236 | 0.00278647 | 0.00447422 |
| DAZ1     | ENSG00000188120 | protein_coding | 0.92769475 | 2.49591237 | 1.17431657 | 2.12541697 | 0.03355184 | 0.04656241 |
| MAPK12   | ENSG00000188130 | protein_coding | 972.745835 | 1.26263286 | 0.15700719 | 8.04187941 | 8.8471E-16 | 3.9964E-15 |
| NUTM2G   | ENSG00000188152 | protein_coding | 12.6481045 | 1.35247519 | 0.15673231 | 8.6292049  | 6.178E-18  | 3.1954E-17 |
| OTOG     | ENSG00000188162 | protein_coding | 22.9248977 | 2.20361404 | 0.19943059 | 11.049529  | 2.2037E-28 | 2.0143E-27 |
| FAM166A  | ENSG00000188163 | protein_coding | 8.54109915 | 1.84216804 | 0.251303   | 7.33046583 | 2.2935E-13 | 8.8129E-13 |
| AGAP4    | ENSG00000188234 | protein_coding | 93.4557618 | 1.07834275 | 0.11290549 | 9.55084404 | 1.2864E-21 | 8.2008E-21 |
| IL17REL  | ENSG00000188263 | protein_coding | 8.85135644 | 2.67621697 | 0.23016853 | 11.6272062 | 2.9975E-31 | 3.1552E-30 |
| RUFY4    | ENSG00000188282 | protein_coding | 60.9506104 | 4.95179388 | 0.2504281  | 19.7733154 | 5.0543E-87 | 4.543E-85  |
| HES4     | ENSG00000188290 | protein_coding | 531.036271 | 2.30238896 | 0.14061597 | 16.373595  | 2.9525E-60 | 1.0108E-58 |
| PEAK3    | ENSG00000188305 | protein_coding | 65.8795868 | 1.40246069 | 0.11984148 | 11.7026314 | 1.2356E-31 | 1.3265E-30 |
| BSPH1    | ENSG00000188334 | protein_coding | 0.53848059 | 1.64552033 | 0.55918011 | 2.94273758 | 0.00325324 | 0.00518611 |
| ZP3      | ENSG00000188372 | protein_coding | 290.253801 | 1.54841066 | 0.14070378 | 11.0047552 | 3.625E-28  | 3.2847E-27 |

|          |                 |                |            |            |            |            |            |            |
|----------|-----------------|----------------|------------|------------|------------|------------|------------|------------|
| C10orf99 | ENSG00000188373 | protein_coding | 973.123436 | 7.226589   | 0.37526877 | 19.2571021 | 1.2308E-82 | 9.372E-81  |
| PPP3R2   | ENSG00000188386 | protein_coding | 1.52003478 | 1.06410225 | 0.29892619 | 3.5597491  | 0.00037121 | 0.00065686 |
| PDCD1    | ENSG00000188389 | protein_coding | 286.107285 | 3.31414922 | 0.20909838 | 15.8497123 | 1.4123E-56 | 4.2286E-55 |
| TCTEX1D4 | ENSG00000188396 | protein_coding | 11.1817439 | 1.07333176 | 0.1573161  | 6.82277132 | 8.9301E-12 | 3.0705E-11 |
| NANOS2   | ENSG00000188425 | protein_coding | 2.48965945 | 3.08144705 | 0.50096847 | 6.15098005 | 7.7006E-10 | 2.2965E-09 |
| KRTDAP   | ENSG00000188508 | protein_coding | 4.23513392 | 1.37350464 | 0.25286349 | 5.43180282 | 5.5788E-08 | 1.4253E-07 |
| PAQR9    | ENSG00000188582 | protein_coding | 19.8566531 | 3.6554421  | 0.26438526 | 13.8261948 | 1.7715E-43 | 3.2097E-42 |
| FAM72B   | ENSG00000188610 | protein_coding | 18.5612579 | 1.33974101 | 0.1396787  | 9.59159156 | 8.6737E-22 | 5.5828E-21 |
| IGFL3    | ENSG00000188624 | protein_coding | 0.99775535 | 2.20759565 | 0.42542716 | 5.18912722 | 2.1128E-07 | 5.137E-07  |
| GOLGA8M  | ENSG00000188626 | protein_coding | 41.5975909 | 1.92162528 | 0.17302574 | 11.1060079 | 1.1729E-28 | 1.0879E-27 |
| ZNF177   | ENSG00000188629 | protein_coding | 1.88150703 | 1.38423519 | 0.2578431  | 5.36851739 | 7.9387E-08 | 2.0035E-07 |
| CC2D2B   | ENSG00000188649 | protein_coding | 12.835005  | 1.58419873 | 0.17375868 | 9.11723492 | 7.7065E-20 | 4.4651E-19 |
| RNASE9   | ENSG00000188655 | protein_coding | 0.5954214  | 1.74509455 | 0.41404893 | 4.2147061  | 2.501E-05  | 5.0133E-05 |
| PARVB    | ENSG00000188677 | protein_coding | 2468.74566 | 1.08556942 | 0.11454527 | 9.47720869 | 2.6118E-21 | 1.6385E-20 |
| SLC4A5   | ENSG00000188687 | protein_coding | 74.1289344 | 1.37510142 | 0.17862312 | 7.69833941 | 1.3785E-14 | 5.7497E-14 |
| DUPD1    | ENSG00000188716 | protein_coding | 0.37148715 | 1.08821275 | 0.3875368  | 2.80802432 | 0.00498465 | 0.0077579  |
| FSIP2    | ENSG00000188738 | protein_coding | 179.239343 | 1.59244316 | 0.21305141 | 7.47445485 | 7.7525E-14 | 3.082E-13  |
| PLET1    | ENSG00000188771 | protein_coding | 2.24517074 | 1.80447493 | 0.32256533 | 5.59413796 | 2.2172E-08 | 5.848E-08  |
| SKOR1    | ENSG00000188779 | protein_coding | 30.183342  | 1.19500123 | 0.11503725 | 10.3879498 | 2.8134E-25 | 2.1881E-24 |
| CATSPER4 | ENSG00000188782 | protein_coding | 2.02433071 | 2.64383287 | 0.48791766 | 5.41860462 | 6.0066E-08 | 1.5309E-07 |
| PLA2G2E  | ENSG00000188784 | protein_coding | 0.44538888 | 1.40466619 | 0.50149266 | 2.8009706  | 0.00509492 | 0.00792091 |
| TMCO2    | ENSG00000188800 | protein_coding | 1.89057254 | 1.01319855 | 0.27655834 | 3.66359788 | 0.0002487  | 0.00044866 |
| ZDHHC11  | ENSG00000188818 | protein_coding | 165.919541 | 1.40863975 | 0.17044661 | 8.26440463 | 1.4039E-16 | 6.674E-16  |
| CALHM6   | ENSG00000188820 | protein_coding | 747.827275 | 2.95926218 | 0.15803696 | 18.7251266 | 3.0894E-78 | 2.0318E-76 |
| GLRA4    | ENSG00000188828 | protein_coding | 2.28158745 | 1.96833224 | 0.27969469 | 7.03743146 | 1.9582E-12 | 7.058E-12  |

|            |                 |                |            |            |            |            |            |            |
|------------|-----------------|----------------|------------|------------|------------|------------|------------|------------|
| FAM78B     | ENSG00000188859 | protein_coding | 234.298882 | 1.37622918 | 0.13815731 | 9.96131991 | 2.2505E-23 | 1.5727E-22 |
| LRRK2      | ENSG00000188906 | protein_coding | 9241.30635 | 1.04622407 | 0.12694272 | 8.24170192 | 1.6978E-16 | 8.0252E-16 |
| BSX        | ENSG00000188909 | protein_coding | 0.59880118 | 1.60667786 | 0.46280176 | 3.47163302 | 0.0005173  | 0.00090111 |
| SLC15A5    | ENSG00000188991 | protein_coding | 2.74384833 | 1.4729979  | 0.29907009 | 4.92525978 | 8.4248E-07 | 1.9425E-06 |
| LIPI       | ENSG00000188992 | protein_coding | 4.80030423 | 1.36112447 | 0.29179514 | 4.66465782 | 3.0913E-06 | 6.7564E-06 |
| LRRC66     | ENSG00000188993 | protein_coding | 139.830384 | 1.93679267 | 0.14922317 | 12.9791687 | 1.6061E-38 | 2.3553E-37 |
| SBSN       | ENSG00000189001 | protein_coding | 9.87937403 | 3.37122031 | 0.43202088 | 7.8033735  | 6.0274E-15 | 2.5791E-14 |
| KIR2DL4    | ENSG00000189013 | protein_coding | 34.6681249 | 2.39381861 | 0.16463207 | 14.5404147 | 6.7184E-48 | 1.4562E-46 |
| MAGEB16    | ENSG00000189023 | protein_coding | 0.52860252 | 1.31002427 | 0.59866057 | 2.18825883 | 0.02865075 | 0.0401455  |
| VHLL       | ENSG00000189030 | protein_coding | 0.94403657 | 1.81785274 | 0.41859699 | 4.34272773 | 1.4072E-05 | 2.8872E-05 |
| RNF222     | ENSG00000189051 | protein_coding | 2.60155932 | 1.16236595 | 0.26648873 | 4.36178271 | 1.2901E-05 | 2.6557E-05 |
| FAM111B    | ENSG00000189057 | protein_coding | 238.660357 | 2.51569886 | 0.1188567  | 21.1658143 | 1.973E-99  | 2.8445E-97 |
| VSTM1      | ENSG00000189068 | protein_coding | 9.34482278 | 1.52853802 | 0.2052489  | 7.44724083 | 9.5313E-14 | 3.7649E-13 |
| PRSS48     | ENSG00000189099 | protein_coding | 1.39917826 | 1.37434458 | 0.32671768 | 4.20652038 | 2.5933E-05 | 5.1893E-05 |
| PLAC9      | ENSG00000189129 | protein_coding | 587.659478 | 1.22429213 | 0.13783921 | 8.88203122 | 6.565E-19  | 3.605E-18  |
| ZAR1L      | ENSG00000189167 | protein_coding | 0.85162084 | 1.52276186 | 0.31499014 | 4.83431599 | 1.336E-06  | 3.0206E-06 |
| KRTAP10-12 | ENSG00000189169 | protein_coding | 0.94723155 | 2.15818987 | 0.7132717  | 3.02576126 | 0.00248008 | 0.00400395 |
| KRT77      | ENSG00000189182 | protein_coding | 1.65473285 | 2.72505893 | 0.51241673 | 5.31805226 | 1.0488E-07 | 2.6172E-07 |
| DCAF8L2    | ENSG00000189186 | protein_coding | 0.80481881 | 1.80783484 | 0.6586749  | 2.7446542  | 0.00605747 | 0.00933913 |
| SPANXN3    | ENSG00000189252 | protein_coding | 0.55425063 | 1.40315788 | 0.61137755 | 2.29507592 | 0.02172877 | 0.03101375 |
| DRICH1     | ENSG00000189269 | protein_coding | 26.3743397 | 1.0177352  | 0.18943837 | 5.37238146 | 7.7704E-08 | 1.9631E-07 |
| ALKAL2     | ENSG00000189292 | protein_coding | 927.412632 | 1.65227114 | 0.20483404 | 8.06638942 | 7.2408E-16 | 3.2877E-15 |
| KIAA0408   | ENSG00000189367 | protein_coding | 10.45962   | 2.16448593 | 0.20209411 | 10.7102868 | 9.1079E-27 | 7.6792E-26 |
| TBC1D28    | ENSG00000189375 | protein_coding | 0.53613001 | 1.1467772  | 0.35861961 | 3.19775377 | 0.00138502 | 0.00230123 |
| OTUD6A     | ENSG00000189401 | protein_coding | 0.59898641 | 1.51283195 | 0.44342284 | 3.4117141  | 0.00064556 | 0.00111264 |

|           |                 |                |            |            |            |            |            |            |
|-----------|-----------------|----------------|------------|------------|------------|------------|------------|------------|
| SH2D5     | ENSG00000189410 | protein_coding | 124.572108 | 2.46678958 | 0.15723306 | 15.6887464 | 1.8059E-55 | 5.2262E-54 |
| NCR1      | ENSG00000189430 | protein_coding | 31.1921196 | 2.61220633 | 0.15563946 | 16.7837024 | 3.2117E-63 | 1.2088E-61 |
| IL1RAP    | ENSG00000196083 | protein_coding | 1015.44363 | 1.00865425 | 0.11546699 | 8.73543406 | 2.4272E-18 | 1.2863E-17 |
| KIAA0895L | ENSG00000196123 | protein_coding | 1507.68884 | 2.0420062  | 0.12273732 | 16.6372076 | 3.7469E-62 | 1.3567E-60 |
| HLA-DRB1  | ENSG00000196126 | protein_coding | 44087.7422 | 1.61527237 | 0.10963169 | 14.7336269 | 3.9209E-49 | 8.9689E-48 |
| PLEKHG4   | ENSG00000196155 | protein_coding | 936.208494 | 2.11628067 | 0.14394959 | 14.7015401 | 6.301E-49  | 1.4278E-47 |
| KIF19     | ENSG00000196169 | protein_coding | 49.9971275 | 1.79580479 | 0.14775498 | 12.1539374 | 5.4668E-34 | 6.5586E-33 |
| CTSE      | ENSG00000196188 | protein_coding | 195.157501 | 2.82286826 | 0.27409082 | 10.2990252 | 7.1179E-25 | 5.3986E-24 |
| SIRPB2    | ENSG00000196209 | protein_coding | 348.066197 | 2.11602951 | 0.11731002 | 18.0379263 | 9.8159E-73 | 5.2322E-71 |
| OR2T2     | ENSG00000196240 | protein_coding | 0.89030818 | 1.31423628 | 0.39893964 | 3.29432364 | 0.00098659 | 0.00166683 |
| BECN2     | ENSG00000196289 | protein_coding | 2.22894111 | 3.66430368 | 0.47955171 | 7.64110226 | 2.1537E-14 | 8.8736E-14 |
| ATP2A1    | ENSG00000196296 | protein_coding | 102.237988 | 2.36369219 | 0.16967204 | 13.9309472 | 4.1087E-44 | 7.6378E-43 |
| GIMAP5    | ENSG00000196329 | protein_coding | 356.967381 | 1.33589753 | 0.11239211 | 11.8860432 | 1.3988E-32 | 1.5666E-31 |
| CGB7      | ENSG00000196337 | protein_coding | 7.45570244 | 2.3694114  | 0.22486414 | 10.5370801 | 5.828E-26  | 4.7085E-25 |
| ADH7      | ENSG00000196344 | protein_coding | 1.68849186 | 2.95927252 | 0.50325045 | 5.8803177  | 4.0948E-09 | 1.1487E-08 |
| NTNG2     | ENSG00000196358 | protein_coding | 181.338093 | 1.69009161 | 0.17285888 | 9.77729105 | 1.4093E-22 | 9.4534E-22 |
| ELAVL3    | ENSG00000196361 | protein_coding | 26.8982061 | 1.20916435 | 0.19733113 | 6.12759043 | 8.922E-10  | 2.645E-09  |
| EVL       | ENSG00000196405 | protein_coding | 4537.24056 | 1.67447075 | 0.08695841 | 19.2559965 | 1.2573E-82 | 9.5584E-81 |
| PRTN3     | ENSG00000196415 | protein_coding | 15.1459864 | 2.67409318 | 0.30846497 | 8.66903366 | 4.358E-18  | 2.2774E-17 |
| C20orf204 | ENSG00000196421 | protein_coding | 62.3887163 | 2.11794409 | 0.13378528 | 15.8309205 | 1.9041E-56 | 5.6754E-55 |
| NBPF4     | ENSG00000196427 | protein_coding | 1.65353487 | 2.34993301 | 0.42508291 | 5.52817565 | 3.2358E-08 | 8.4193E-08 |
| ASMT      | ENSG00000196433 | protein_coding | 6.04027208 | 2.05091087 | 0.20837    | 9.8426397  | 7.375E-23  | 5.0152E-22 |
| NPIP15    | ENSG00000196436 | protein_coding | 122.198598 | 1.74493084 | 0.23082399 | 7.55957304 | 4.0439E-14 | 1.6363E-13 |
| RFX8      | ENSG00000196460 | protein_coding | 81.2822912 | 3.42187838 | 0.17607037 | 19.4347203 | 3.9255E-84 | 3.157E-82  |
| FAM72A    | ENSG00000196550 | protein_coding | 22.3369577 | 1.44715452 | 0.11370882 | 12.7268454 | 4.1945E-37 | 5.8284E-36 |

|          |                 |                |            |            |            |            |            |            |
|----------|-----------------|----------------|------------|------------|------------|------------|------------|------------|
| HBG2     | ENSG00000196565 | protein_coding | 16.7611117 | 2.0153786  | 0.24994564 | 8.06326762 | 7.4282E-16 | 3.3704E-15 |
| XRCC2    | ENSG00000196584 | protein_coding | 109.39165  | 1.59615177 | 0.1197381  | 13.3303581 | 1.5416E-40 | 2.4631E-39 |
| MMP1     | ENSG00000196611 | protein_coding | 417.051119 | 2.08985447 | 0.25396592 | 8.22887763 | 1.8898E-16 | 8.8986E-16 |
| UGT2B15  | ENSG00000196620 | protein_coding | 3.93789335 | 1.05182331 | 0.31531219 | 3.33581555 | 0.0008505  | 0.00144704 |
| TCF4     | ENSG00000196628 | protein_coding | 7230.55028 | 1.17569523 | 0.10780902 | 10.905351  | 1.0867E-27 | 9.6116E-27 |
| HRH1     | ENSG00000196639 | protein_coding | 978.62702  | 1.01905192 | 0.11247233 | 9.0604677  | 1.2989E-19 | 7.417E-19  |
| SLC30A10 | ENSG00000196660 | protein_coding | 20.71091   | 2.93144802 | 0.39741542 | 7.37628155 | 1.6277E-13 | 6.3266E-13 |
| TLR7     | ENSG00000196664 | protein_coding | 764.779908 | 2.07738824 | 0.15201537 | 13.6656459 | 1.6285E-42 | 2.8278E-41 |
| TRPV1    | ENSG00000196689 | protein_coding | 16.1064061 | 1.36829131 | 0.17105323 | 7.99921366 | 1.2522E-15 | 5.6077E-15 |
| HLA-DQA1 | ENSG00000196735 | protein_coding | 15062.4607 | 2.1950662  | 0.13594029 | 16.1472822 | 1.1868E-58 | 3.842E-57  |
| COL27A1  | ENSG00000196739 | protein_coding | 4215.737   | 1.74705377 | 0.12729623 | 13.7243167 | 7.261E-43  | 1.2832E-41 |
| GM2A     | ENSG00000196743 | protein_coding | 6789.6153  | 1.35635435 | 0.08136077 | 16.6708637 | 2.1349E-62 | 7.7794E-61 |
| H2AC13   | ENSG00000196747 | protein_coding | 31.8309576 | 3.93689294 | 0.26002322 | 15.1405439 | 8.7487E-52 | 2.2268E-50 |
| H2AC11   | ENSG00000196787 | protein_coding | 82.8063151 | 1.77018347 | 0.20494677 | 8.63728415 | 5.7565E-18 | 2.9851E-17 |
| CHRNA1   | ENSG00000196811 | protein_coding | 3.72440475 | 2.26098549 | 0.29151552 | 7.75596947 | 8.7671E-15 | 3.7099E-14 |
| ADA      | ENSG00000196839 | protein_coding | 726.123217 | 2.22429019 | 0.13450619 | 16.5367125 | 1.9962E-61 | 7.0555E-60 |
| ARID5A   | ENSG00000196843 | protein_coding | 1813.14771 | 1.39478118 | 0.09942147 | 14.0289734 | 1.0364E-44 | 1.9657E-43 |
| H2AC7    | ENSG00000196866 | protein_coding | 14.9799958 | 1.16539822 | 0.20989139 | 5.55238706 | 2.8179E-08 | 7.3702E-08 |
| CBWD3    | ENSG00000196873 | protein_coding | 40.1304986 | 1.05304235 | 0.11361495 | 9.26851902 | 1.8875E-20 | 1.1285E-19 |
| H2BU1    | ENSG00000196890 | protein_coding | 21.3672108 | 1.75156141 | 0.23087966 | 7.58646924 | 3.2874E-14 | 1.3375E-13 |
| TEX43    | ENSG00000196900 | protein_coding | 1.58468136 | 1.70254045 | 0.33979602 | 5.01047784 | 5.4295E-07 | 1.2744E-06 |
| ANKRD36B | ENSG00000196912 | protein_coding | 100.669755 | 1.35573006 | 0.13886252 | 9.76311015 | 1.6211E-22 | 1.0825E-21 |
| PDLIM7   | ENSG00000196923 | protein_coding | 2387.81808 | 1.00473429 | 0.11106504 | 9.04636001 | 1.4781E-19 | 8.4236E-19 |
| ZNF705A  | ENSG00000196946 | protein_coding | 2.30734353 | 2.08291333 | 0.29295603 | 7.10998628 | 1.1605E-12 | 4.254E-12  |
| CASP4    | ENSG00000196954 | protein_coding | 3257.59445 | 1.24680545 | 0.06803909 | 18.3248398 | 5.2436E-75 | 3.0465E-73 |



|          |                 |                |            |            |            |            |            |            |
|----------|-----------------|----------------|------------|------------|------------|------------|------------|------------|
| FUT11    | ENSG00000196968 | protein_coding | 3534.9602  | 1.54951066 | 0.06939815 | 22.3278385 | 1.983E-110 | 4.267E-108 |
| ANXA4    | ENSG00000196975 | protein_coding | 41164.2567 | 1.83977888 | 0.09336548 | 19.7051303 | 1.9484E-86 | 1.7209E-84 |
| DTHD1    | ENSG00000197057 | protein_coding | 70.1146332 | 3.22509343 | 0.20134769 | 16.0175339 | 9.6398E-58 | 3.0329E-56 |
| H4C3     | ENSG00000197061 | protein_coding | 8.62008431 | 1.32033809 | 0.26011505 | 5.07597737 | 3.8551E-07 | 9.1637E-07 |
| GAL3ST4  | ENSG00000197093 | protein_coding | 966.559043 | 2.88098267 | 0.12332995 | 23.3599598 | 1.092E-120 | 3.089E-118 |
| ADAM32   | ENSG00000197140 | protein_coding | 55.6167669 | 1.37978694 | 0.16671484 | 8.27632926 | 1.2703E-16 | 6.0595E-16 |
| H3C12    | ENSG00000197153 | protein_coding | 3.04822094 | 2.45391674 | 0.33551451 | 7.31389156 | 2.5951E-13 | 9.9327E-13 |
| MAGEA6   | ENSG00000197172 | protein_coding | 1.17064451 | 2.10527253 | 0.63478375 | 3.31651928 | 0.00091146 | 0.00154492 |
| SLC22A4  | ENSG00000197208 | protein_coding | 822.96663  | 1.0237717  | 0.13122892 | 7.80141808 | 6.1215E-15 | 2.6177E-14 |
| H4C11    | ENSG00000197238 | protein_coding | 4.83883148 | 2.22575917 | 0.23351023 | 9.53174159 | 1.5467E-21 | 9.8187E-21 |
| SLC2A7   | ENSG00000197241 | protein_coding | 7.4923589  | 2.29058181 | 0.21188556 | 10.8104668 | 3.071E-27  | 2.6552E-26 |
| SERPINA1 | ENSG00000197249 | protein_coding | 91033.789  | 1.70022576 | 0.18334036 | 9.27360334 | 1.7996E-20 | 1.078E-19  |
| TPSB2    | ENSG00000197253 | protein_coding | 518.015005 | 1.67819064 | 0.19446675 | 8.6297047  | 6.1511E-18 | 3.1818E-17 |
| C6orf141 | ENSG00000197261 | protein_coding | 74.9969796 | 2.12341933 | 0.25478696 | 8.33409723 | 7.8092E-17 | 3.773E-16  |
| IL27     | ENSG00000197272 | protein_coding | 10.8586347 | 2.44160043 | 0.18629904 | 13.1058131 | 3.0498E-39 | 4.6247E-38 |
| RAD54B   | ENSG00000197275 | protein_coding | 159.797757 | 1.07278968 | 0.12790546 | 8.38736394 | 4.9716E-17 | 2.4328E-16 |
| BLM      | ENSG00000197299 | protein_coding | 146.442823 | 1.24430149 | 0.10789964 | 11.5320266 | 9.0977E-31 | 9.3195E-30 |
| LYPD2    | ENSG00000197353 | protein_coding | 4.48278734 | 1.64637822 | 0.22727378 | 7.24403057 | 4.3554E-13 | 1.6403E-12 |
| C5AR1    | ENSG00000197405 | protein_coding | 1486.68547 | 1.36512336 | 0.11683102 | 11.6845973 | 1.528E-31  | 1.6324E-30 |
| H3C4     | ENSG00000197409 | protein_coding | 31.9800175 | 1.55756764 | 0.20308904 | 7.6693831  | 1.7283E-14 | 7.1619E-14 |
| DCHS2    | ENSG00000197410 | protein_coding | 170.051388 | 1.50319298 | 0.20140826 | 7.46341263 | 8.431E-14  | 3.3407E-13 |
| FABP12   | ENSG00000197416 | protein_coding | 0.31424105 | 1.00015029 | 0.46248191 | 2.16257168 | 0.03057414 | 0.04266901 |
| OPALIN   | ENSG00000197430 | protein_coding | 1.14907677 | 2.45529837 | 0.57993024 | 4.23378229 | 2.2979E-05 | 4.621E-05  |
| CYP2F1   | ENSG00000197446 | protein_coding | 1.92606903 | 2.1111794  | 0.35646448 | 5.92255188 | 3.1698E-09 | 8.9802E-09 |
| STMN3    | ENSG00000197457 | protein_coding | 4101.75791 | 2.14010246 | 0.14355048 | 14.9083617 | 2.908E-50  | 6.9757E-49 |

|           |                 |                |            |            |            |            |            |            |
|-----------|-----------------|----------------|------------|------------|------------|------------|------------|------------|
| SPN       | ENSG00000197471 | protein_coding | 1162.94561 | 2.11876516 | 0.13022073 | 16.270567  | 1.5967E-59 | 5.3311E-58 |
| GALP      | ENSG00000197487 | protein_coding | 0.87273117 | 2.42002789 | 0.56199496 | 4.30613809 | 1.6613E-05 | 3.3835E-05 |
| SLC28A3   | ENSG00000197506 | protein_coding | 21.9647848 | 1.41251308 | 0.21321139 | 6.62494183 | 3.4738E-11 | 1.1456E-10 |
| FAM177B   | ENSG00000197520 | protein_coding | 59.2665836 | 1.90040837 | 0.15408574 | 12.3334473 | 5.9831E-35 | 7.504E-34  |
| GZMM      | ENSG00000197540 | protein_coding | 127.82915  | 2.07370318 | 0.13622172 | 15.2229994 | 2.4886E-52 | 6.478E-51  |
| HOXA4     | ENSG00000197576 | protein_coding | 549.816893 | 1.2321964  | 0.10607992 | 11.6157366 | 3.4282E-31 | 3.5962E-30 |
| DMBX1     | ENSG00000197587 | protein_coding | 5.17356777 | 3.50522113 | 0.42590212 | 8.23010959 | 1.8704E-16 | 8.8103E-16 |
| CCDC154   | ENSG00000197599 | protein_coding | 52.2809062 | 2.29340935 | 0.19868032 | 11.5432135 | 7.9884E-31 | 8.2088E-30 |
| ZNF841    | ENSG00000197608 | protein_coding | 698.132179 | 1.07446081 | 0.09443801 | 11.3774187 | 5.418E-30  | 5.3619E-29 |
| MPEG1     | ENSG00000197629 | protein_coding | 3587.22059 | 1.29778641 | 0.12151277 | 10.6802471 | 1.2594E-26 | 1.0556E-25 |
| SERPINB2  | ENSG00000197632 | protein_coding | 5.15508839 | 1.01069433 | 0.35504892 | 2.84663398 | 0.00441841 | 0.00692815 |
| SERPINB13 | ENSG00000197641 | protein_coding | 1.38964124 | 2.59919328 | 0.45619987 | 5.69748806 | 1.2159E-08 | 3.2796E-08 |
| PDCD1LG2  | ENSG00000197646 | protein_coding | 285.922263 | 1.08841795 | 0.12338945 | 8.82099659 | 1.1345E-18 | 6.1362E-18 |
| OR51C1P   | ENSG00000197674 | protein_coding | 0.82850741 | 2.24863356 | 0.37621713 | 5.97695687 | 2.2734E-09 | 6.525E-09  |
| NMB       | ENSG00000197696 | protein_coding | 1427.87581 | 2.56735186 | 0.16741389 | 15.3353578 | 4.4382E-53 | 1.1822E-51 |
| LHFPL5    | ENSG00000197753 | protein_coding | 6.42216991 | 3.33991918 | 0.34524752 | 9.67398448 | 3.8893E-22 | 2.5485E-21 |
| CFD       | ENSG00000197766 | protein_coding | 884.423302 | 1.2635716  | 0.16088947 | 7.85366225 | 4.0406E-15 | 1.7484E-14 |
| STPG3     | ENSG00000197768 | protein_coding | 58.7259926 | 1.74151962 | 0.22595036 | 7.70753196 | 1.2827E-14 | 5.3627E-14 |
| EME2      | ENSG00000197774 | protein_coding | 736.103899 | 1.88815275 | 0.14552732 | 12.9745583 | 1.7058E-38 | 2.4974E-37 |
| CCDC180   | ENSG00000197816 | protein_coding | 101.45329  | 1.31712347 | 0.15400437 | 8.55250708 | 1.2044E-17 | 6.1157E-17 |
| CYP2A13   | ENSG00000197838 | protein_coding | 0.90199228 | 2.19262337 | 0.48445129 | 4.52599349 | 6.0112E-06 | 1.2784E-05 |
| CYRIA     | ENSG00000197872 | protein_coding | 1123.56168 | 1.55059763 | 0.0924113  | 16.7793081 | 3.4584E-63 | 1.2963E-61 |
| UGT2B17   | ENSG00000197888 | protein_coding | 19.995652  | 1.8262551  | 0.26845202 | 6.80291063 | 1.0253E-11 | 3.5056E-11 |
| H2BC12    | ENSG00000197903 | protein_coding | 684.628199 | 1.10689761 | 0.13722103 | 8.06653017 | 7.2324E-16 | 3.2842E-15 |
| HES5      | ENSG00000197921 | protein_coding | 20.5505967 | 3.82759424 | 0.24513133 | 15.6144634 | 5.8031E-55 | 1.6492E-53 |

|            |                 |                |            |            |            |            |            |            |
|------------|-----------------|----------------|------------|------------|------------|------------|------------|------------|
| ERO1A      | ENSG00000197930 | protein_coding | 7496.52308 | 1.4789066  | 0.08814337 | 16.7784214 | 3.5104E-63 | 1.3147E-61 |
| FCHSD1     | ENSG00000197948 | protein_coding | 932.196684 | 1.2979043  | 0.10015012 | 12.9595881 | 2.0736E-38 | 3.0224E-37 |
| ELOVL2     | ENSG00000197977 | protein_coding | 289.254783 | 3.20264703 | 0.18794814 | 17.0400569 | 4.1433E-65 | 1.6675E-63 |
| GOLGA6L9   | ENSG00000197978 | protein_coding | 114.297212 | 1.32380059 | 0.13221055 | 10.0128214 | 1.3388E-23 | 9.4753E-23 |
| CLEC9A     | ENSG00000197992 | protein_coding | 101.289231 | 1.41995879 | 0.16068397 | 8.83696608 | 9.8353E-19 | 5.3413E-18 |
| FCGR1B     | ENSG00000198019 | protein_coding | 88.9715272 | 2.85055308 | 0.14155405 | 20.1375595 | 3.4597E-90 | 3.4933E-88 |
| TUBA3C     | ENSG00000198033 | protein_coding | 6.34368349 | 4.69883896 | 0.46780998 | 10.0443326 | 9.7304E-24 | 6.9381E-23 |
| AVPR1B     | ENSG00000198049 | protein_coding | 205.766483 | 3.71986702 | 0.20193539 | 18.4210751 | 8.9018E-76 | 5.3272E-74 |
| SIRPA      | ENSG00000198053 | protein_coding | 12229.3636 | 1.52553041 | 0.09643449 | 15.8193443 | 2.2886E-56 | 6.7993E-55 |
| NPIP13     | ENSG00000198064 | protein_coding | 14.9199433 | 3.12632313 | 0.24496799 | 12.7621702 | 2.6667E-37 | 3.7349E-36 |
| AKR1B10    | ENSG00000198074 | protein_coding | 186.446924 | 1.03234349 | 0.33786085 | 3.05552863 | 0.00224664 | 0.00364315 |
| CYP2A7     | ENSG00000198077 | protein_coding | 1.61706521 | 1.84485024 | 0.33172157 | 5.56144182 | 2.6755E-08 | 7.0094E-08 |
| TMPRSS11F  | ENSG00000198092 | protein_coding | 1.91610474 | 2.36302164 | 0.36987068 | 6.38877792 | 1.6722E-10 | 5.2345E-10 |
| CHSY3      | ENSG00000198108 | protein_coding | 312.317966 | 2.19844018 | 0.11922927 | 18.4387621 | 6.4194E-76 | 3.8873E-74 |
| MB         | ENSG00000198125 | protein_coding | 28.4456788 | 1.11275195 | 0.19841596 | 5.60817756 | 2.0447E-08 | 5.4129E-08 |
| NPIPB6     | ENSG00000198156 | protein_coding | 6.49877197 | 1.2288402  | 0.21957771 | 5.5963796  | 2.1887E-08 | 5.7766E-08 |
| RPS6KL1    | ENSG00000198208 | protein_coding | 290.833635 | 1.16930823 | 0.13261046 | 8.81761694 | 1.1692E-18 | 6.319E-18  |
| AC092143.1 | ENSG00000198211 | protein_coding | 0.44637114 | 1.17917039 | 0.45818832 | 2.57354965 | 0.01006612 | 0.01505615 |
| CSF2RA     | ENSG00000198223 | protein_coding | 728.031883 | 1.92548147 | 0.11492969 | 16.75356   | 5.3337E-63 | 1.983E-61  |
| CARD11     | ENSG00000198286 | protein_coding | 998.798989 | 2.10460597 | 0.16324685 | 12.892169  | 4.9823E-38 | 7.1799E-37 |
| TMEM239    | ENSG00000198326 | protein_coding | 0.78386157 | 2.02075953 | 0.43052951 | 4.69366092 | 2.6836E-06 | 5.8996E-06 |
| MYL4       | ENSG00000198336 | protein_coding | 44.8337504 | 1.5760483  | 0.11777801 | 13.3815162 | 7.7549E-41 | 1.2509E-39 |
| NRARP      | ENSG00000198435 | protein_coding | 753.07392  | 1.6260581  | 0.12239243 | 13.2856097 | 2.8056E-40 | 4.4273E-39 |
| OR14L1P    | ENSG00000198452 | protein_coding | 0.56874232 | 1.18108105 | 0.31418711 | 3.75916463 | 0.00017048 | 0.00031305 |
| RTP2       | ENSG00000198471 | protein_coding | 18.2121524 | 5.27813556 | 0.33624077 | 15.6974884 | 1.5735E-55 | 4.5595E-54 |

|           |                 |                |            |            |            |            |            |            |
|-----------|-----------------|----------------|------------|------------|------------|------------|------------|------------|
| HLA-DRB5  | ENSG00000198502 | protein_coding | 14182.4734 | 1.34920672 | 0.13674325 | 9.86671507 | 5.8034E-23 | 3.9653E-22 |
| C20orf203 | ENSG00000198547 | protein_coding | 14.0538589 | 2.95459912 | 0.24348155 | 12.1347966 | 6.9081E-34 | 8.2554E-33 |
| DDX39B    | ENSG00000198563 | protein_coding | 4150.90479 | 1.56825396 | 0.12039284 | 13.0261402 | 8.6893E-39 | 1.287E-37  |
| SH2D1B    | ENSG00000198574 | protein_coding | 84.3297516 | 1.21552194 | 0.1230608  | 9.87741002 | 5.2164E-23 | 3.5733E-22 |
| MMP17     | ENSG00000198598 | protein_coding | 87.3722483 | 2.03110783 | 0.22013969 | 9.22644985 | 2.7975E-20 | 1.6551E-19 |
| BAZ1A     | ENSG00000198604 | protein_coding | 1996.58957 | 1.18297804 | 0.07117323 | 16.6211083 | 4.9018E-62 | 1.7652E-60 |
| RYR2      | ENSG00000198626 | protein_coding | 230.771629 | 1.57437438 | 0.23543879 | 6.6869795  | 2.2782E-11 | 7.6148E-11 |
| ANKRD13B  | ENSG00000198720 | protein_coding | 304.881499 | 1.43802622 | 0.12080419 | 11.9037773 | 1.1311E-32 | 1.2718E-31 |
| PLXNB3    | ENSG00000198753 | protein_coding | 185.128338 | 2.01558603 | 0.19499553 | 10.3365754 | 4.8144E-25 | 3.6875E-24 |
| EPS8L3    | ENSG00000198758 | protein_coding | 281.68541  | 3.56644569 | 0.32932395 | 10.8295972 | 2.4925E-27 | 2.1652E-26 |
| RCSD1     | ENSG00000198771 | protein_coding | 1865.67398 | 1.22398579 | 0.08790822 | 13.9234513 | 4.5633E-44 | 8.469E-43  |
| MUC2      | ENSG00000198788 | protein_coding | 2.97688212 | 2.44929999 | 0.32941427 | 7.4353184  | 1.0432E-13 | 4.1103E-13 |
| ALPK2     | ENSG00000198796 | protein_coding | 4740.86993 | 1.94007319 | 0.15339495 | 12.647569  | 1.1539E-36 | 1.5724E-35 |
| BRINP2    | ENSG00000198797 | protein_coding | 9.81034492 | 1.11791608 | 0.26915807 | 4.15338119 | 3.276E-05  | 6.491E-05  |
| LRRC10    | ENSG00000198812 | protein_coding | 0.60770383 | 1.38735655 | 0.40369807 | 3.43661926 | 0.00058902 | 0.00101959 |
| FOXJ3     | ENSG00000198815 | protein_coding | 9421.40084 | 1.6332083  | 0.12277553 | 13.3023928 | 2.2418E-40 | 3.5534E-39 |
| CD247     | ENSG00000198821 | protein_coding | 636.168557 | 2.57107175 | 0.1288241  | 19.9580029 | 1.2772E-88 | 1.2146E-86 |
| ARHGAP11A | ENSG00000198826 | protein_coding | 396.638351 | 1.38473627 | 0.10805795 | 12.8147559 | 1.3556E-37 | 1.9228E-36 |
| GJC2      | ENSG00000198835 | protein_coding | 189.461275 | 1.36007128 | 0.15295092 | 8.89220741 | 5.9907E-19 | 3.2963E-18 |
| CD3E      | ENSG00000198851 | protein_coding | 1651.3285  | 2.63661297 | 0.16269769 | 16.2055956 | 4.604E-59  | 1.5151E-57 |
| GRK5      | ENSG00000198873 | protein_coding | 1584.39417 | 1.24875159 | 0.08572926 | 14.5662238 | 4.6066E-48 | 1.007E-46  |
| ITPRIPL1  | ENSG00000198885 | protein_coding | 142.274151 | 1.77972052 | 0.09821785 | 18.1201333 | 2.2106E-73 | 1.2064E-71 |
| PRC1      | ENSG00000198901 | protein_coding | 741.510977 | 1.34525757 | 0.09317813 | 14.4374822 | 3.0062E-47 | 6.3477E-46 |
| RASGEF1A  | ENSG00000198915 | protein_coding | 526.668721 | 1.04629381 | 0.16014067 | 6.53359197 | 6.4211E-11 | 2.0742E-10 |
| CSAG1     | ENSG00000198930 | protein_coding | 7.80843595 | 3.56168868 | 0.29181802 | 12.2051704 | 2.917E-34  | 3.5431E-33 |

|          |                 |                |            |            |            |            |            |            |
|----------|-----------------|----------------|------------|------------|------------|------------|------------|------------|
| TGM2     | ENSG00000198959 | protein_coding | 29419.7917 | 1.2663744  | 0.13176218 | 9.6110611  | 7.1805E-22 | 4.6439E-21 |
| INF2     | ENSG00000203485 | protein_coding | 8615.99914 | 1.28777597 | 0.09194957 | 14.0052417 | 1.4479E-44 | 2.7347E-43 |
| METTL11B | ENSG00000203740 | protein_coding | 0.86407708 | 1.54224364 | 0.43409228 | 3.55280133 | 0.00038115 | 0.0006736  |
| FCGR3A   | ENSG00000203747 | protein_coding | 8049.29853 | 3.32135225 | 0.14265015 | 23.2832015 | 6.561E-120 | 1.812E-117 |
| LORICRIN | ENSG00000203782 | protein_coding | 0.46918063 | 1.01213171 | 0.39524863 | 2.56074692 | 0.01044474 | 0.01559093 |
| SPRR2E   | ENSG00000203785 | protein_coding | 1.13238491 | 1.8815653  | 0.71339165 | 2.63749273 | 0.00835214 | 0.01264475 |
| H3C14    | ENSG00000203811 | protein_coding | 0.84423962 | 1.31381547 | 0.55869209 | 2.3515913  | 0.0186933  | 0.02691669 |
| PNLIPRP3 | ENSG00000203837 | protein_coding | 2.89622088 | 1.83977455 | 0.67344869 | 2.7318704  | 0.00629759 | 0.00968979 |
| SMIM9    | ENSG00000203870 | protein_coding | 3.39514759 | 3.26878883 | 0.32757616 | 9.97871411 | 1.889E-23  | 1.3253E-22 |
| C6orf163 | ENSG00000203872 | protein_coding | 44.8413122 | 1.06675969 | 0.13805695 | 7.72695393 | 1.1015E-14 | 4.6316E-14 |
| OOEP     | ENSG00000203907 | protein_coding | 16.5569698 | 1.21242398 | 0.32686438 | 3.70925698 | 0.00020787 | 0.00037815 |
| KHDC3L   | ENSG00000203908 | protein_coding | 1.08025905 | 1.95862633 | 0.38033876 | 5.14968895 | 2.6092E-07 | 6.2965E-07 |
| C1orf146 | ENSG00000203910 | protein_coding | 3.18949501 | 1.4130265  | 0.24210188 | 5.83649527 | 5.331E-09  | 1.4821E-08 |
| GLT6D1   | ENSG00000204007 | protein_coding | 0.70909513 | 2.0845039  | 0.4954853  | 4.20699442 | 2.5879E-05 | 5.1786E-05 |
| IFIT1B   | ENSG00000204010 | protein_coding | 5.75852142 | 1.32365875 | 0.25380865 | 5.21518375 | 1.8364E-07 | 4.4913E-07 |
| LIPN     | ENSG00000204020 | protein_coding | 6.88776244 | 1.57912728 | 0.1982107  | 7.96691244 | 1.6269E-15 | 7.2384E-15 |
| LRIT2    | ENSG00000204033 | protein_coding | 7.77145973 | 4.12323147 | 0.37414279 | 11.0204754 | 3.0445E-28 | 2.7669E-27 |
| RPA4     | ENSG00000204086 | protein_coding | 7.43245598 | 2.85239611 | 0.22523516 | 12.6640799 | 9.351E-37  | 1.2792E-35 |
| CLPSL1   | ENSG00000204140 | protein_coding | 1.50847197 | 1.66342464 | 0.51354526 | 3.23910036 | 0.00119907 | 0.00200638 |
| AGAP6    | ENSG00000204149 | protein_coding | 288.176056 | 1.59373825 | 0.13507511 | 11.7989041 | 3.9543E-32 | 4.3376E-31 |
| TMEM273  | ENSG00000204161 | protein_coding | 813.16172  | 1.320735   | 0.10787038 | 12.2437225 | 1.8151E-34 | 2.223E-33  |
| CXorf65  | ENSG00000204165 | protein_coding | 20.9436692 | 3.44328076 | 0.22579685 | 15.2494631 | 1.6599E-52 | 4.3481E-51 |
| AGAP9    | ENSG00000204172 | protein_coding | 236.499509 | 1.21899978 | 0.14736991 | 8.2717004  | 1.3206E-16 | 6.2923E-16 |
| NPY4R    | ENSG00000204174 | protein_coding | 3.42722803 | 2.80784498 | 0.34989093 | 8.02491514 | 1.016E-15  | 4.5727E-15 |
| AWAT1    | ENSG00000204195 | protein_coding | 1.70553551 | 1.52746652 | 0.33321754 | 4.58399192 | 4.5618E-06 | 9.8196E-06 |

|          |                 |                |            |            |            |            |            |            |
|----------|-----------------|----------------|------------|------------|------------|------------|------------|------------|
| COL11A2  | ENSG00000204248 | protein_coding | 102.564538 | 1.09885347 | 0.1531049  | 7.17712796 | 7.1191E-13 | 2.647E-12  |
| HLA-DOA  | ENSG00000204252 | protein_coding | 4817.97941 | 1.38052639 | 0.13658392 | 10.1075324 | 5.1157E-24 | 3.7053E-23 |
| HLA-DMA  | ENSG00000204257 | protein_coding | 7807.73509 | 1.48674406 | 0.09539216 | 15.5856005 | 9.1202E-55 | 2.5744E-53 |
| COL5A2   | ENSG00000204262 | protein_coding | 6301.63385 | 2.0572066  | 0.13536543 | 15.1974292 | 3.6777E-52 | 9.5411E-51 |
| PSMB8    | ENSG00000204264 | protein_coding | 7789.44815 | 1.62342889 | 0.07825257 | 20.7460126 | 1.3319E-95 | 1.6913E-93 |
| TAP2     | ENSG00000204267 | protein_coding | 2433.28459 | 1.13834964 | 0.07664828 | 14.8516013 | 6.7926E-50 | 1.6023E-48 |
| TMEM235  | ENSG00000204278 | protein_coding | 1.16472645 | 1.64510238 | 0.47101146 | 3.49270136 | 0.00047816 | 0.00083627 |
| HLA-DRA  | ENSG00000204287 | protein_coding | 77220.4688 | 1.71365769 | 0.11222242 | 15.2701907 | 1.2082E-52 | 3.183E-51  |
| COL15A1  | ENSG00000204291 | protein_coding | 7882.94757 | 1.40671948 | 0.14216146 | 9.89522415 | 4.3663E-23 | 3.0067E-22 |
| TMEM225  | ENSG00000204300 | protein_coding | 0.92662469 | 2.47614751 | 0.49275884 | 5.02506964 | 5.0325E-07 | 1.1842E-06 |
| NOTCH4   | ENSG00000204301 | protein_coding | 6899.69324 | 1.56075589 | 0.11440995 | 13.641785  | 2.2596E-42 | 3.8956E-41 |
| AGER     | ENSG00000204305 | protein_coding | 342.804743 | 2.07397382 | 0.1399742  | 14.8168292 | 1.1404E-49 | 2.6645E-48 |
| CD300LD  | ENSG00000204345 | protein_coding | 0.97139405 | 1.73142373 | 0.37675599 | 4.59561031 | 4.3148E-06 | 9.3072E-06 |
| BTBD17   | ENSG00000204347 | protein_coding | 0.60457435 | 1.41358427 | 0.32580494 | 4.33874415 | 1.433E-05  | 2.9389E-05 |
| LAYN     | ENSG00000204381 | protein_coding | 956.810384 | 1.24930295 | 0.10713693 | 11.6608058 | 2.0212E-31 | 2.1458E-30 |
| CARD16   | ENSG00000204397 | protein_coding | 560.006963 | 1.92772714 | 0.10109184 | 19.069067  | 4.5637E-81 | 3.3102E-79 |
| MSH5     | ENSG00000204410 | protein_coding | 241.897934 | 2.17258569 | 0.151322   | 14.357368  | 9.5797E-47 | 1.9817E-45 |
| LY6G6C   | ENSG00000204421 | protein_coding | 3.04471669 | 1.80315902 | 0.2798164  | 6.4440792  | 1.163E-10  | 3.6835E-10 |
| AIF1     | ENSG00000204472 | protein_coding | 2131.87638 | 1.03997643 | 0.11182642 | 9.29991661 | 1.4056E-20 | 8.4768E-20 |
| NCR3     | ENSG00000204475 | protein_coding | 46.7580827 | 1.82610335 | 0.13604438 | 13.4228498 | 4.4429E-41 | 7.2428E-40 |
| PRAMEF17 | ENSG00000204479 | protein_coding | 0.63401724 | 1.99867887 | 0.57128612 | 3.49856018 | 0.00046778 | 0.00081895 |
| LST1     | ENSG00000204482 | protein_coding | 1037.10777 | 2.24714592 | 0.11638125 | 19.3084873 | 4.5573E-83 | 3.4935E-81 |
| MICB     | ENSG00000204516 | protein_coding | 351.477681 | 1.29019104 | 0.08703476 | 14.8238597 | 1.0271E-49 | 2.4046E-48 |
| HLA-C    | ENSG00000204525 | protein_coding | 103326.721 | 1.33235694 | 0.08145362 | 16.3572469 | 3.862E-60  | 1.3163E-58 |
| POU5F1   | ENSG00000204531 | protein_coding | 1816.8709  | 3.4005418  | 0.15634374 | 21.7504182 | 6.845E-105 | 1.255E-102 |



|           |                 |                |            |            |            |            |            |            |
|-----------|-----------------|----------------|------------|------------|------------|------------|------------|------------|
| PSORS1C2  | ENSG00000204538 | protein_coding | 22.8036372 | 3.73106503 | 0.21966591 | 16.9851797 | 1.0573E-64 | 4.2036E-63 |
| CDSN      | ENSG00000204539 | protein_coding | 4.67320637 | 2.95434671 | 0.28135223 | 10.5005271 | 8.5899E-26 | 6.8805E-25 |
| PSORS1C1  | ENSG00000204540 | protein_coding | 358.154517 | 2.95520928 | 0.13448225 | 21.9747155 | 5.027E-107 | 9.764E-105 |
| C6orf15   | ENSG00000204542 | protein_coding | 0.79944537 | 1.18370421 | 0.40919868 | 2.8927371  | 0.00381901 | 0.00603597 |
| KRTAP5-11 | ENSG00000204571 | protein_coding | 1.25495231 | 2.11075794 | 0.35096923 | 6.01408269 | 1.8091E-09 | 5.2315E-09 |
| KRTAP5-10 | ENSG00000204572 | protein_coding | 16.3827277 | 2.73440746 | 0.21288025 | 12.8448151 | 9.1971E-38 | 1.3106E-36 |
| LILRB3    | ENSG00000204577 | protein_coding | 205.487965 | 2.44969051 | 0.12397001 | 19.7603471 | 6.5354E-87 | 5.8399E-85 |
| HLA-E     | ENSG00000204592 | protein_coding | 78840.5719 | 1.05288576 | 0.0651945  | 16.1499171 | 1.1371E-58 | 3.6892E-57 |
| DPRX      | ENSG00000204595 | protein_coding | 0.69852616 | 2.00649733 | 0.4596897  | 4.36489515 | 1.2718E-05 | 2.6197E-05 |
| TRIM15    | ENSG00000204610 | protein_coding | 637.965772 | 1.21239319 | 0.18957439 | 6.39534263 | 1.6019E-10 | 5.0244E-10 |
| FOXB2     | ENSG00000204612 | protein_coding | 1.16954006 | 2.68356155 | 0.45047435 | 5.95719063 | 2.5661E-09 | 7.3264E-09 |
| TRIM31    | ENSG00000204616 | protein_coding | 18.8701004 | 1.02049095 | 0.16746708 | 6.0936809  | 1.1034E-09 | 3.2458E-09 |
| DISP3     | ENSG00000204624 | protein_coding | 27.0690087 | 1.61493633 | 0.19409281 | 8.32043348 | 8.7642E-17 | 4.2224E-16 |
| RACK1     | ENSG00000204628 | protein_coding | 90066.973  | 1.20005594 | 0.0763069  | 15.7267038 | 9.9245E-56 | 2.8941E-54 |
| HLA-G     | ENSG00000204632 | protein_coding | 2220.20637 | 3.84504325 | 0.20292011 | 18.9485571 | 4.5386E-80 | 3.1861E-78 |
| HLA-F     | ENSG00000204642 | protein_coding | 8458.29631 | 2.44095256 | 0.10256233 | 23.7996996 | 3.364E-125 | 1.101E-122 |
| MOG       | ENSG00000204655 | protein_coding | 9.18066651 | 3.37925676 | 0.45985416 | 7.34854009 | 2.0038E-13 | 7.7341E-13 |
| OR2H2     | ENSG00000204657 | protein_coding | 1.28164179 | 2.03423544 | 0.36426605 | 5.5844772  | 2.344E-08  | 6.1705E-08 |
| C9orf57   | ENSG00000204669 | protein_coding | 1.42575952 | 2.28728525 | 0.41087815 | 5.56682127 | 2.5943E-08 | 6.8019E-08 |
| GABBR1    | ENSG00000204681 | protein_coding | 1146.35773 | 1.12315166 | 0.13732972 | 8.17850409 | 2.8739E-16 | 1.3379E-15 |
| OR2H1     | ENSG00000204688 | protein_coding | 2.62303426 | 3.05162582 | 0.47415016 | 6.43599022 | 1.2267E-10 | 3.8798E-10 |
| OR11A1    | ENSG00000204694 | protein_coding | 1.31490529 | 2.48562637 | 0.46201565 | 5.37996146 | 7.4502E-08 | 1.8853E-07 |
| INSYN2B   | ENSG00000204767 | protein_coding | 146.23921  | 1.09330156 | 0.22018799 | 4.96530969 | 6.8592E-07 | 1.5948E-06 |
| FOXD4L5   | ENSG00000204779 | protein_coding | 0.86754992 | 1.14452362 | 0.33163159 | 3.45119002 | 0.00055812 | 0.00096886 |
| IGFL2     | ENSG00000204866 | protein_coding | 21.5097425 | 4.28196553 | 0.32456859 | 13.1927908 | 9.6544E-40 | 1.4886E-38 |

|            |                 |                |            |            |            |            |            |            |
|------------|-----------------|----------------|------------|------------|------------|------------|------------|------------|
| GPR20      | ENSG00000204882 | protein_coding | 56.9071691 | 1.27298625 | 0.16641512 | 7.64946282 | 2.0182E-14 | 8.3288E-14 |
| KRT25      | ENSG00000204897 | protein_coding | 11.4307444 | 4.64908594 | 0.44343628 | 10.4842255 | 1.0208E-25 | 8.1437E-25 |
| PCDHGA1    | ENSG00000204956 | protein_coding | 117.854119 | 1.33282752 | 0.15493116 | 8.60270771 | 7.7857E-18 | 4.0007E-17 |
| PCDHA9     | ENSG00000204961 | protein_coding | 12.3089468 | 1.0146334  | 0.18040003 | 5.62435275 | 1.862E-08  | 4.9483E-08 |
| MS4A13     | ENSG00000204979 | protein_coding | 0.65437842 | 1.43623149 | 0.61110443 | 2.35022269 | 0.01876218 | 0.02700993 |
| PABPN1L    | ENSG00000205022 | protein_coding | 0.96120917 | 2.02284248 | 0.35009012 | 5.77806216 | 7.5566E-09 | 2.0706E-08 |
| SLFN12L    | ENSG00000205045 | protein_coding | 138.940584 | 2.68034139 | 0.15885169 | 16.8732317 | 7.0814E-64 | 2.7142E-62 |
| SYCE1L     | ENSG00000205078 | protein_coding | 118.928343 | 1.5787879  | 0.17478984 | 9.0324922  | 1.6781E-19 | 9.5274E-19 |
| FAM71F2    | ENSG00000205085 | protein_coding | 104.933999 | 1.26236941 | 0.16178928 | 7.80255266 | 6.0667E-15 | 2.5955E-14 |
| ACCSL      | ENSG00000205126 | protein_coding | 1.85506462 | 1.80784268 | 0.30814267 | 5.86690152 | 4.4401E-09 | 1.2428E-08 |
| C4orf47    | ENSG00000205129 | protein_coding | 373.640355 | 2.51077465 | 0.12451462 | 20.1644963 | 2.0078E-90 | 2.0408E-88 |
| ARID3C     | ENSG00000205143 | protein_coding | 12.6128546 | 3.00357326 | 0.24057971 | 12.4847323 | 9.0447E-36 | 1.1799E-34 |
| PSMB10     | ENSG00000205220 | protein_coding | 1906.90854 | 1.37911004 | 0.0974823  | 14.1472868 | 1.941E-45  | 3.796E-44  |
| AC105052.1 | ENSG00000205236 | protein_coding | 0.41962537 | 1.02818692 | 0.32224539 | 3.19069548 | 0.00141931 | 0.00235503 |
| SPDYE2     | ENSG00000205238 | protein_coding | 14.1147679 | 1.38781955 | 0.17432058 | 7.96130617 | 1.7023E-15 | 7.5617E-15 |
| PDE7A      | ENSG00000205268 | protein_coding | 2363.58496 | 1.14083458 | 0.10043911 | 11.3584697 | 6.7313E-30 | 6.6388E-29 |
| MUC12      | ENSG00000205277 | protein_coding | 151.328439 | 4.3308127  | 0.23503024 | 18.4266189 | 8.035E-76  | 4.8211E-74 |
| SAP25      | ENSG00000205307 | protein_coding | 9.85080945 | 2.35932525 | 0.22745293 | 10.3728066 | 3.297E-25  | 2.5538E-24 |
| KRT6A      | ENSG00000205420 | protein_coding | 24.1591169 | 4.31841524 | 0.47314719 | 9.12700183 | 7.0423E-20 | 4.0878E-19 |
| KRT81      | ENSG00000205426 | protein_coding | 37.404213  | 3.34293744 | 0.23579503 | 14.1773024 | 1.2662E-45 | 2.503E-44  |
| EXOC3L4    | ENSG00000205436 | protein_coding | 725.204289 | 2.03379842 | 0.15781085 | 12.8875704 | 5.2884E-38 | 7.6067E-37 |
| IZUMO3     | ENSG00000205442 | protein_coding | 0.50491969 | 1.70194826 | 0.53162544 | 3.20140486 | 0.00136759 | 0.002274   |
| CPT1B      | ENSG00000205560 | protein_coding | 146.009969 | 1.84773738 | 0.17732146 | 10.4202694 | 2.0038E-25 | 1.5721E-24 |
| C17orf107  | ENSG00000205710 | protein_coding | 425.864165 | 1.12777524 | 0.12007109 | 9.39256268 | 5.8558E-21 | 3.5983E-20 |
| CRLF2      | ENSG00000205755 | protein_coding | 10.2883454 | 2.33324474 | 0.22189237 | 10.5152097 | 7.3517E-26 | 5.9052E-25 |

|            |                 |                |            |            |            |            |            |            |
|------------|-----------------|----------------|------------|------------|------------|------------|------------|------------|
| ARRDC5     | ENSG00000205784 | protein_coding | 29.1832366 | 3.76723265 | 0.2086832  | 18.0524001 | 7.5536E-73 | 4.0404E-71 |
| KLRC2      | ENSG00000205809 | protein_coding | 7.36850969 | 2.51748887 | 0.2376722  | 10.5922733 | 3.2364E-26 | 2.6474E-25 |
| KLRC3      | ENSG00000205810 | protein_coding | 2.98075522 | 2.31832592 | 0.26043112 | 8.90187753 | 5.491E-19  | 3.0258E-18 |
| C22orf42   | ENSG00000205856 | protein_coding | 1.30242908 | 2.2233911  | 0.31117384 | 7.14517367 | 8.9882E-13 | 3.3188E-12 |
| NANOGNB    | ENSG00000205857 | protein_coding | 0.51851467 | 1.12909177 | 0.48089129 | 2.34791479 | 0.01887884 | 0.02716763 |
| C1QTNF9B   | ENSG00000205863 | protein_coding | 5.84572614 | 1.14875971 | 0.19572985 | 5.86910835 | 4.3815E-09 | 1.2268E-08 |
| KRTAP5-1   | ENSG00000205869 | protein_coding | 8.32536301 | 1.16346297 | 0.24107702 | 4.82610485 | 1.3923E-06 | 3.1425E-06 |
| DEFB134    | ENSG00000205882 | protein_coding | 0.4502505  | 1.18567549 | 0.48394085 | 2.45004215 | 0.01428395 | 0.02091314 |
| ONECUT3    | ENSG00000205922 | protein_coding | 5.25769443 | 2.42350892 | 0.29359687 | 8.25454613 | 1.5248E-16 | 7.2351E-16 |
| OLIG2      | ENSG00000205927 | protein_coding | 33.7147634 | 2.81370034 | 0.38516061 | 7.30526503 | 2.7672E-13 | 1.0567E-12 |
| IFITM5     | ENSG00000206013 | protein_coding | 4.81122759 | 3.80864687 | 0.41629593 | 9.14889281 | 5.752E-20  | 3.3547E-19 |
| C18orf63   | ENSG00000206043 | protein_coding | 9.02055171 | 1.93765111 | 0.23362489 | 8.29385553 | 1.0964E-16 | 5.2516E-16 |
| TMEM211    | ENSG00000206069 | protein_coding | 5.75183876 | 1.01755222 | 0.20959125 | 4.8549366  | 1.2043E-06 | 2.7341E-06 |
| ZDHHC11B   | ENSG00000206077 | protein_coding | 265.938561 | 1.6231401  | 0.19585954 | 8.28726578 | 1.1588E-16 | 5.5415E-16 |
| HBM        | ENSG00000206177 | protein_coding | 3.99280952 | 2.20748986 | 0.42174687 | 5.23415826 | 1.6574E-07 | 4.0672E-07 |
| ANKUB1     | ENSG00000206199 | protein_coding | 4.44397287 | 1.54218077 | 0.24596909 | 6.26981522 | 3.6148E-10 | 1.1051E-09 |
| FOXL2NB    | ENSG00000206262 | protein_coding | 3.00044719 | 3.05834147 | 0.39406807 | 7.76094716 | 8.4297E-15 | 3.5708E-14 |
| HLA-A      | ENSG00000206503 | protein_coding | 121338.753 | 1.69065034 | 0.08334932 | 20.283912  | 1.7837E-91 | 1.8883E-89 |
| CD200R1L   | ENSG00000206531 | protein_coding | 0.70591054 | 1.77238249 | 0.32456523 | 5.4607898  | 4.7402E-08 | 1.2173E-07 |
| AC109583.1 | ENSG00000206549 | protein_coding | 33.266955  | 1.67350978 | 0.20327715 | 8.23265067 | 1.8312E-16 | 8.6316E-16 |
| TSSK1B     | ENSG00000212122 | protein_coding | 0.60997883 | 1.22906603 | 0.57535507 | 2.13618701 | 0.03266417 | 0.04540201 |
| PRR22      | ENSG00000212123 | protein_coding | 124.128871 | 1.41421543 | 0.13093687 | 10.8007423 | 3.4143E-27 | 2.9431E-26 |
| TAS2R19    | ENSG00000212124 | protein_coding | 12.7284013 | 1.59387608 | 0.18196877 | 8.75906381 | 1.9688E-18 | 1.0502E-17 |
| TAS2R50    | ENSG00000212126 | protein_coding | 1.96622412 | 1.48702619 | 0.29015529 | 5.12493213 | 2.9764E-07 | 7.1466E-07 |
| TAS2R13    | ENSG00000212128 | protein_coding | 1.74627965 | 1.46731604 | 0.3125849  | 4.694136   | 2.6774E-06 | 5.8867E-06 |

|           |                 |                |            |            |            |            |            |            |
|-----------|-----------------|----------------|------------|------------|------------|------------|------------|------------|
| KRTAP16-1 | ENSG00000212657 | protein_coding | 1.94866162 | 2.19180544 | 0.36524464 | 6.00092436 | 1.962E-09  | 5.6576E-09 |
| KRTAP29-1 | ENSG00000212658 | protein_coding | 0.88155146 | 2.21607621 | 0.3391708  | 6.53380603 | 6.4119E-11 | 2.0714E-10 |
| CTAGE1    | ENSG00000212710 | protein_coding | 1.64595702 | 1.13171682 | 0.26701222 | 4.23844577 | 2.2507E-05 | 4.5296E-05 |
| CEP43     | ENSG00000213066 | protein_coding | 1713.24416 | 1.35620094 | 0.10015024 | 13.541665  | 8.8754E-42 | 1.4871E-40 |
| CRYGS     | ENSG00000213139 | protein_coding | 146.826151 | 2.10213802 | 0.14343844 | 14.6553328 | 1.2454E-48 | 2.7904E-47 |
| CRIP1     | ENSG00000213145 | protein_coding | 179.450598 | 1.88646613 | 0.13920059 | 13.5521414 | 7.6952E-42 | 1.2931E-40 |
| TRIM59    | ENSG00000213186 | protein_coding | 374.146682 | 1.16292236 | 0.07806654 | 14.8965538 | 3.4702E-50 | 8.2767E-49 |
| ASIC3     | ENSG00000213199 | protein_coding | 65.4988123 | 1.99617632 | 0.16556829 | 12.0565133 | 1.7921E-33 | 2.0952E-32 |
| LTC4S     | ENSG00000213316 | protein_coding | 3.7675551  | 1.09940847 | 0.18592916 | 5.91305025 | 3.3583E-09 | 9.4906E-09 |
| QTRT1     | ENSG00000213339 | protein_coding | 2275.30406 | 1.17082655 | 0.09719878 | 12.0456922 | 2.0435E-33 | 2.3855E-32 |
| MXD3      | ENSG00000213347 | protein_coding | 268.096446 | 2.54872503 | 0.1373865  | 18.5514954 | 7.9314E-77 | 5.0081E-75 |
| HAUS7     | ENSG00000213397 | protein_coding | 347.752854 | 1.8075304  | 0.16168858 | 11.1790854 | 5.1619E-29 | 4.889E-28  |
| LCAT      | ENSG00000213398 | protein_coding | 656.769653 | 1.78440208 | 0.12867573 | 13.867433  | 9.9784E-44 | 1.826E-42  |
| MAGEA12   | ENSG00000213401 | protein_coding | 3.14505158 | 2.30899264 | 0.30796504 | 7.49758047 | 6.5007E-14 | 2.5985E-13 |
| PVRIG     | ENSG00000213413 | protein_coding | 18.1385157 | 1.58712827 | 0.16155031 | 9.82435917 | 8.8435E-23 | 5.9925E-22 |
| GPC2      | ENSG00000213420 | protein_coding | 32.5258382 | 1.97188797 | 0.15893339 | 12.4070091 | 2.3943E-35 | 3.0719E-34 |
| SIPA1     | ENSG00000213445 | protein_coding | 3124.79375 | 1.09638129 | 0.07461733 | 14.6933876 | 7.107E-49  | 1.6089E-47 |
| GBP7      | ENSG00000213512 | protein_coding | 25.7866576 | 1.15985338 | 0.21910184 | 5.29367242 | 1.1988E-07 | 2.9754E-07 |
| GPSM3     | ENSG00000213654 | protein_coding | 1821.93076 | 1.92373923 | 0.09606072 | 20.026283  | 3.2503E-89 | 3.1769E-87 |
| LAT       | ENSG00000213658 | protein_coding | 61.1132123 | 3.35733061 | 0.19033442 | 17.6391147 | 1.2338E-69 | 5.8609E-68 |
| UGT2B11   | ENSG00000213759 | protein_coding | 36.7785777 | 1.08133862 | 0.20215352 | 5.34909626 | 8.8395E-08 | 2.2201E-07 |
| DDX47     | ENSG00000213782 | protein_coding | 122.882933 | 1.62653209 | 0.11569916 | 14.0582879 | 6.8524E-45 | 1.3094E-43 |
| KLRK1     | ENSG00000213809 | protein_coding | 48.8905799 | 3.38475069 | 0.20277002 | 16.6925596 | 1.4847E-62 | 5.4403E-61 |
| UBD       | ENSG00000213886 | protein_coding | 1449.34256 | 3.16768817 | 0.188306   | 16.8220244 | 1.6831E-63 | 6.4135E-62 |
| PPM1N     | ENSG00000213889 | protein_coding | 58.1642848 | 1.13228554 | 0.14246373 | 7.94788649 | 1.8972E-15 | 8.4045E-15 |

|           |                 |                |            |            |            |            |            |            |
|-----------|-----------------|----------------|------------|------------|------------|------------|------------|------------|
| CEACAM16  | ENSG00000213892 | protein_coding | 2.43114849 | 1.76284337 | 0.35107161 | 5.0213213  | 5.1317E-07 | 1.2068E-06 |
| LTB4R     | ENSG00000213903 | protein_coding | 699.624408 | 2.52168803 | 0.12089154 | 20.8590937 | 1.2604E-96 | 1.6943E-94 |
| LTB4R2    | ENSG00000213906 | protein_coding | 131.142911 | 2.18469596 | 0.12068041 | 18.1031537 | 3.0093E-73 | 1.6364E-71 |
| CSNK1E    | ENSG00000213923 | protein_coding | 5896.52368 | 1.10220999 | 0.06435607 | 17.1267444 | 9.3757E-66 | 3.8477E-64 |
| IRF9      | ENSG00000213928 | protein_coding | 369.783178 | 1.68727064 | 0.13329634 | 12.6580417 | 1.0099E-36 | 1.3798E-35 |
| HBG1      | ENSG00000213934 | protein_coding | 1.56643463 | 2.74788923 | 0.79274385 | 3.46630152 | 0.00052767 | 0.00091823 |
| AP1G2     | ENSG00000213983 | protein_coding | 1542.48858 | 1.13705163 | 0.10683991 | 10.6425737 | 1.8884E-26 | 1.5679E-25 |
| ZNF90     | ENSG00000213988 | protein_coding | 229.577048 | 1.0434498  | 0.13611151 | 7.6661395  | 1.7725E-14 | 7.3406E-14 |
| TM6SF2    | ENSG00000213996 | protein_coding | 221.46852  | 1.13234966 | 0.20582533 | 5.50150775 | 3.7656E-08 | 9.7414E-08 |
| MEF2B     | ENSG00000213999 | protein_coding | 26.8935342 | 2.01403659 | 0.14471176 | 13.9175733 | 4.9544E-44 | 9.1801E-43 |
| TTLL3     | ENSG00000214021 | protein_coding | 986.78348  | 1.58712719 | 0.14094811 | 11.260365  | 2.059E-29  | 1.9892E-28 |
| TSPAN4    | ENSG00000214063 | protein_coding | 5405.1823  | 1.19421053 | 0.08117604 | 14.7113669 | 5.4495E-49 | 1.2374E-47 |
| SMCO1     | ENSG00000214097 | protein_coding | 0.94536774 | 1.59273418 | 0.31789305 | 5.01028308 | 5.435E-07  | 1.2756E-06 |
| PRCD      | ENSG00000214140 | protein_coding | 58.2676494 | 1.04157213 | 0.11518727 | 9.04242359 | 1.5324E-19 | 8.7217E-19 |
| SH3D21    | ENSG00000214193 | protein_coding | 878.92536  | 1.45388027 | 0.11668097 | 12.4603033 | 1.229E-35  | 1.5965E-34 |
| C19orf38  | ENSG00000214212 | protein_coding | 170.272027 | 1.24516163 | 0.10875693 | 11.4490328 | 2.3778E-30 | 2.3946E-29 |
| MINDY4B   | ENSG00000214237 | protein_coding | 3.36591423 | 1.21153544 | 0.20424853 | 5.9316728  | 2.9986E-09 | 8.5131E-09 |
| ANG       | ENSG00000214274 | protein_coding | 1256.23573 | 1.57802293 | 0.12293174 | 12.8365785 | 1.023E-37  | 1.455E-36  |
| SCART1    | ENSG00000214279 | protein_coding | 140.537087 | 2.22851074 | 0.17040595 | 13.0776583 | 4.4184E-39 | 6.6517E-38 |
| NEURL1B   | ENSG00000214357 | protein_coding | 3587.09283 | 1.12635977 | 0.10357662 | 10.8746524 | 1.5223E-27 | 1.3328E-26 |
| GNAT3     | ENSG00000214415 | protein_coding | 0.51212038 | 1.33454988 | 0.50800217 | 2.62705548 | 0.00861273 | 0.01300705 |
| SPINK13   | ENSG00000214510 | protein_coding | 362.754602 | 4.6370515  | 0.26904575 | 17.2351783 | 1.4461E-66 | 6.1152E-65 |
| HIGD1C    | ENSG00000214511 | protein_coding | 2.69154403 | 1.20348421 | 0.2326207  | 5.17359031 | 2.2964E-07 | 5.5659E-07 |
| ZNF705E   | ENSG00000214534 | protein_coding | 8.29705415 | 1.15560229 | 0.15468537 | 7.47066286 | 7.9792E-14 | 3.1691E-13 |
| C10orf105 | ENSG00000214688 | protein_coding | 9.23314514 | 1.5002826  | 0.15902723 | 9.43412422 | 3.9427E-21 | 2.4484E-20 |

|           |                 |                |            |            |            |            |            |            |
|-----------|-----------------|----------------|------------|------------|------------|------------|------------|------------|
| MS4A18    | ENSG00000214782 | protein_coding | 0.58284429 | 1.45494415 | 0.41605471 | 3.49700201 | 0.00047052 | 0.00082347 |
| MS4A4E    | ENSG00000214787 | protein_coding | 58.4871182 | 3.13114521 | 0.17790674 | 17.5999248 | 2.4665E-69 | 1.1538E-67 |
| MTCP1     | ENSG00000214827 | protein_coding | 491.425791 | 3.24908376 | 0.12727599 | 25.5278615 | 9.673E-144 | 5.279E-141 |
| SMTNL1    | ENSG00000214872 | protein_coding | 35.065143  | 2.94156598 | 0.2089761  | 14.0760883 | 5.3278E-45 | 1.0236E-43 |
| SPATA31D1 | ENSG00000214929 | protein_coding | 0.89036894 | 2.33453225 | 0.45307569 | 5.15263187 | 2.5686E-07 | 6.2027E-07 |
| NPIPA8    | ENSG00000214940 | protein_coding | 0.72951586 | 1.91515786 | 0.41042013 | 4.6663351  | 3.0662E-06 | 6.7041E-06 |
| GPR33     | ENSG00000214943 | protein_coding | 2.20803644 | 1.22082794 | 0.26802993 | 4.5548194  | 5.2431E-06 | 1.1211E-05 |
| TBC1D26   | ENSG00000214946 | protein_coding | 2.91748955 | 3.22596328 | 0.33344436 | 9.67466737 | 3.8635E-22 | 2.5322E-21 |
| NPIPA7    | ENSG00000214967 | protein_coding | 0.4165058  | 1.20643373 | 0.4905875  | 2.45916118 | 0.01392621 | 0.0204148  |
| GSG1L2    | ENSG00000214978 | protein_coding | 161.218596 | 9.5628117  | 0.55359558 | 17.2740031 | 7.3838E-67 | 3.1634E-65 |
| ACSM4     | ENSG00000215009 | protein_coding | 11.392611  | 1.91864619 | 0.21194162 | 9.05271081 | 1.3946E-19 | 7.9566E-19 |
| NLRP2B    | ENSG00000215174 | protein_coding | 6.53790905 | 1.57297533 | 0.17875646 | 8.79954379 | 1.3737E-18 | 7.3999E-18 |
| MUC5AC    | ENSG00000215182 | protein_coding | 1.93489933 | 1.52902547 | 0.34362508 | 4.44969113 | 8.5994E-06 | 1.8004E-05 |
| GOLGA6B   | ENSG00000215186 | protein_coding | 0.99655143 | 2.08882619 | 0.3562009  | 5.86418005 | 4.5136E-09 | 1.2624E-08 |
| GOLGA8B   | ENSG00000215252 | protein_coding | 1041.08948 | 1.99950754 | 0.17918262 | 11.1590487 | 6.468E-29  | 6.0958E-28 |
| KCNU1     | ENSG00000215262 | protein_coding | 3.29071203 | 4.09009603 | 0.57393602 | 7.1263972  | 1.0303E-12 | 3.7869E-12 |
| ZNF705G   | ENSG00000215372 | protein_coding | 1.05297711 | 2.73245641 | 0.57486467 | 4.75321682 | 2.0021E-06 | 4.4528E-06 |
| MYL5      | ENSG00000215375 | protein_coding | 683.797755 | 1.20802456 | 0.0975218  | 12.3872254 | 3.0646E-35 | 3.8981E-34 |
| SCRT2     | ENSG00000215397 | protein_coding | 0.56846679 | 1.49710544 | 0.35279459 | 4.24356128 | 2.2E-05    | 4.4316E-05 |
| NPEPL1    | ENSG00000215440 | protein_coding | 1320.00824 | 1.49168168 | 0.1367079  | 10.9114517 | 1.0162E-27 | 9E-27      |
| SKOR2     | ENSG00000215474 | protein_coding | 0.50154614 | 1.32485587 | 0.44252621 | 2.99384725 | 0.00275484 | 0.00442576 |
| EFCAB8    | ENSG00000215529 | protein_coding | 10.6296833 | 2.54088566 | 0.25360003 | 10.019264  | 1.2543E-23 | 8.894E-23  |
| C20orf202 | ENSG00000215595 | protein_coding | 60.9796097 | 1.32790031 | 0.10043702 | 13.2212238 | 6.6178E-40 | 1.0256E-38 |
| FAM72D    | ENSG00000215784 | protein_coding | 9.35511113 | 1.78100201 | 0.17099996 | 10.4152191 | 2.1131E-25 | 1.6556E-24 |
| TNFRSF25  | ENSG00000215788 | protein_coding | 496.237933 | 1.83876529 | 0.14678607 | 12.5268376 | 5.3244E-36 | 7.0217E-35 |



|          |                 |                |            |            |            |            |            |            |
|----------|-----------------|----------------|------------|------------|------------|------------|------------|------------|
| RPTN     | ENSG00000215853 | protein_coding | 4.48286577 | 4.06011461 | 0.51358294 | 7.90547018 | 2.6692E-15 | 1.1697E-14 |
| C1orf167 | ENSG00000215910 | protein_coding | 5.78642448 | 1.05526121 | 0.19861748 | 5.313033   | 1.0782E-07 | 2.6859E-07 |
| TTC34    | ENSG00000215912 | protein_coding | 124.460207 | 1.33097214 | 0.13587022 | 9.79590804 | 1.1724E-22 | 7.9035E-22 |
| IFI30    | ENSG00000216490 | protein_coding | 124.648758 | 2.30710403 | 0.156427   | 14.7487581 | 3.1338E-49 | 7.1972E-48 |
| SP9      | ENSG00000217236 | protein_coding | 0.67914071 | 1.67103649 | 0.70442784 | 2.37218972 | 0.01768301 | 0.0255591  |
| CKLF     | ENSG00000217555 | protein_coding | 366.244021 | 1.09173899 | 0.06764342 | 16.1396191 | 1.3437E-58 | 4.3377E-57 |
| PAM16    | ENSG00000217930 | protein_coding | 393.369322 | 1.03526139 | 0.0891002  | 11.6190688 | 3.2971E-31 | 3.4626E-30 |
| CELA3B   | ENSG00000219073 | protein_coding | 0.86515149 | 1.52988672 | 0.50014976 | 3.05885723 | 0.00222183 | 0.0036047  |
| CATSPERZ | ENSG00000219435 | protein_coding | 3.0019188  | 1.81631884 | 0.28432473 | 6.38818461 | 1.6787E-10 | 5.2531E-10 |
| TAF5A    | ENSG00000219438 | protein_coding | 283.647564 | 1.36255141 | 0.16314286 | 8.35189125 | 6.7179E-17 | 3.2601E-16 |
| PPP1R3G  | ENSG00000219607 | protein_coding | 515.164449 | 2.12567387 | 0.10851005 | 19.5896493 | 1.8949E-85 | 1.6027E-83 |
| LINGO3   | ENSG00000220008 | protein_coding | 23.7067277 | 2.49122434 | 0.1687368  | 14.7639655 | 2.5013E-49 | 5.7619E-48 |
| ZGLP1    | ENSG00000220201 | protein_coding | 46.8626534 | 1.26810227 | 0.13362276 | 9.4901669  | 2.3066E-21 | 1.4511E-20 |
| EBF2     | ENSG00000221818 | protein_coding | 788.638386 | 2.76414539 | 0.15435419 | 17.9078097 | 1.0249E-71 | 5.2436E-70 |
| PSG3     | ENSG00000221826 | protein_coding | 1.95758155 | 2.9693352  | 0.50691131 | 5.85770158 | 4.6932E-09 | 1.3108E-08 |
| MAGEA3   | ENSG00000221867 | protein_coding | 3.71419281 | 4.0336622  | 0.62038729 | 6.50184536 | 7.9341E-11 | 2.5473E-10 |
| PSG7     | ENSG00000221878 | protein_coding | 0.76264897 | 1.93648795 | 0.52230513 | 3.70757982 | 0.00020925 | 0.00038054 |
| FXD7     | ENSG00000221946 | protein_coding | 11.1128235 | 1.70830509 | 0.16590515 | 10.2968779 | 7.2785E-25 | 5.515E-24  |
| XKR9     | ENSG00000221947 | protein_coding | 85.2955645 | 1.10697012 | 0.16582704 | 6.67544996 | 2.4647E-11 | 8.219E-11  |
| APOL6    | ENSG00000221963 | protein_coding | 6793.81434 | 1.05380557 | 0.0909142  | 11.5912103 | 4.5663E-31 | 4.7596E-30 |
| FADS3    | ENSG00000221968 | protein_coding | 1818.63531 | 1.32123585 | 0.09728489 | 13.5811003 | 5.1842E-42 | 8.7693E-41 |
| CCNL2    | ENSG00000221978 | protein_coding | 5059.49667 | 1.79205597 | 0.13342055 | 13.431634  | 3.9461E-41 | 6.4466E-40 |
| TIAF1    | ENSG00000221995 | protein_coding | 165.850852 | 1.16718073 | 0.11604063 | 10.0583803 | 8.4375E-24 | 6.0397E-23 |
| BTBD19   | ENSG00000222009 | protein_coding | 673.927664 | 1.90294918 | 0.11931169 | 15.9493945 | 2.8767E-57 | 8.8863E-56 |
| DCDC2B   | ENSG00000222046 | protein_coding | 21.5129734 | 1.83725853 | 0.1801273  | 10.1997782 | 1.9873E-24 | 1.4757E-23 |

|          |                 |                |            |            |            |            |            |            |
|----------|-----------------|----------------|------------|------------|------------|------------|------------|------------|
| EBLN1    | ENSG00000223601 | protein_coding | 0.69896977 | 1.66113439 | 0.35384141 | 4.69457323 | 2.6716E-06 | 5.8745E-06 |
| ZNF735   | ENSG00000223614 | protein_coding | 0.6096372  | 1.36399625 | 0.595333   | 2.2911484  | 0.02195483 | 0.03131496 |
| RFPL4A   | ENSG00000223638 | protein_coding | 4.12067877 | 1.20717582 | 0.24440035 | 4.9393376  | 7.8388E-07 | 1.8124E-06 |
| CERS1    | ENSG00000223802 | protein_coding | 26.3548313 | 1.7595129  | 0.24700988 | 7.12324918 | 1.0541E-12 | 3.8726E-12 |
| HLA-DPB1 | ENSG00000223865 | protein_coding | 27215.8529 | 2.05741096 | 0.11554392 | 17.8063104 | 6.3137E-71 | 3.1631E-69 |
| C4B      | ENSG00000224389 | protein_coding | 4377.34568 | 1.6902375  | 0.16374218 | 10.322554  | 5.5721E-25 | 4.2508E-24 |
| NPIPA3   | ENSG00000224712 | protein_coding | 16.1105396 | 2.45346671 | 0.24564038 | 9.98804311 | 1.7194E-23 | 1.2091E-22 |
| PPP4R3C  | ENSG00000224960 | protein_coding | 0.52502415 | 1.49639703 | 0.6746624  | 2.21799383 | 0.02655525 | 0.03742144 |
| TMEM233  | ENSG00000224982 | protein_coding | 428.673612 | 2.077944   | 0.12979943 | 16.0088837 | 1.1078E-57 | 3.4711E-56 |
| PVALEF   | ENSG00000225180 | protein_coding | 0.82084582 | 1.72003714 | 0.36281769 | 4.74077534 | 2.129E-06  | 4.723E-06  |
| Z82206.1 | ENSG00000225528 | protein_coding | 9.63705254 | 1.07445341 | 0.17680299 | 6.07712235 | 1.2236E-09 | 3.5843E-09 |
| ZNF469   | ENSG00000225614 | protein_coding | 310.245864 | 2.05553011 | 0.12162334 | 16.9007864 | 4.4395E-64 | 1.7203E-62 |
| FAM229A  | ENSG00000225828 | protein_coding | 148.978298 | 1.13230781 | 0.13583334 | 8.33600791 | 7.6841E-17 | 3.7161E-16 |
| KIF4B    | ENSG00000226650 | protein_coding | 5.55365023 | 2.39402175 | 0.24204463 | 9.89082793 | 4.5624E-23 | 3.1389E-22 |
| TAS2R46  | ENSG00000226761 | protein_coding | 1.58708698 | 1.61266176 | 0.33981164 | 4.74575201 | 2.0773E-06 | 4.6124E-06 |
| LTA      | ENSG00000226979 | protein_coding | 51.688481  | 2.63233641 | 0.17043838 | 15.4445053 | 8.2156E-54 | 2.2471E-52 |
| AKR1B15  | ENSG00000227471 | protein_coding | 7.41027712 | 1.47046138 | 0.39920225 | 3.68349972 | 0.00023005 | 0.00041642 |
| LTB      | ENSG00000227507 | protein_coding | 535.844328 | 1.09510403 | 0.16386621 | 6.68291555 | 2.3423E-11 | 7.8228E-11 |
| RD3L     | ENSG00000227729 | protein_coding | 0.56217505 | 1.29229495 | 0.57760268 | 2.23734236 | 0.02526397 | 0.03570825 |
| ORM2     | ENSG00000228278 | protein_coding | 10.0770103 | 3.43525834 | 0.3413261  | 10.0644467 | 7.9332E-24 | 5.685E-23  |
| C2orf92  | ENSG00000228486 | protein_coding | 156.281733 | 2.04204125 | 0.14018395 | 14.5668695 | 4.5633E-48 | 9.9897E-47 |
| SAPCD1   | ENSG00000228727 | protein_coding | 46.9456865 | 2.97110624 | 0.21278837 | 13.9627283 | 2.6316E-44 | 4.924E-43  |
| PGA4     | ENSG00000229183 | protein_coding | 1.17532989 | 2.37566496 | 0.43429323 | 5.47018648 | 4.4956E-08 | 1.156E-07  |
| RFPL4AL1 | ENSG00000229292 | protein_coding | 1.05665987 | 1.3961367  | 0.34287079 | 4.07190327 | 4.6631E-05 | 9.0934E-05 |
| ORM1     | ENSG00000229314 | protein_coding | 27.105561  | 3.41628443 | 0.39632222 | 8.61996702 | 6.6973E-18 | 3.4562E-17 |

|          |                 |                |            |            |            |            |            |            |
|----------|-----------------|----------------|------------|------------|------------|------------|------------|------------|
| SFTA3    | ENSG00000229415 | protein_coding | 1.50402378 | 1.06074108 | 0.35986218 | 2.94763149 | 0.00320219 | 0.00510845 |
| PATL2    | ENSG00000229474 | protein_coding | 168.631252 | 2.83719127 | 0.1458691  | 19.4502554 | 2.8998E-84 | 2.3528E-82 |
| PRAC2    | ENSG00000229637 | protein_coding | 3.32543158 | 3.91041747 | 0.52395441 | 7.46327809 | 8.4396E-14 | 3.3438E-13 |
| PGA3     | ENSG00000229859 | protein_coding | 3.39702042 | 1.64680076 | 0.36547077 | 4.50597125 | 6.607E-06  | 1.3993E-05 |
| TEX53    | ENSG00000230054 | protein_coding | 1.83857872 | 1.53990386 | 0.26983231 | 5.70689213 | 1.1506E-08 | 3.1082E-08 |
| CCDC192  | ENSG00000230561 | protein_coding | 19.9079251 | 1.18992694 | 0.11621975 | 10.2385953 | 1.3316E-24 | 9.9771E-24 |
| TEX48    | ENSG00000230601 | protein_coding | 0.89701281 | 2.12349126 | 0.3945815  | 5.38162906 | 7.3815E-08 | 1.8683E-07 |
| PLSCR5   | ENSG00000231213 | protein_coding | 0.47052492 | 1.23834116 | 0.48626607 | 2.5466329  | 0.01087678 | 0.0161926  |
| HLA-DPA1 | ENSG00000231389 | protein_coding | 36348.2009 | 1.83654514 | 0.11976729 | 15.3342793 | 4.5125E-53 | 1.2013E-51 |
| CYP21A2  | ENSG00000231852 | protein_coding | 101.293155 | 2.49869477 | 0.19878496 | 12.5698381 | 3.0936E-36 | 4.1248E-35 |
| PSG1     | ENSG00000231924 | protein_coding | 2.87439196 | 2.82848373 | 0.40318782 | 7.01530058 | 2.2946E-12 | 8.2259E-12 |
| TAPBP    | ENSG00000231925 | protein_coding | 22658.9621 | 1.59712616 | 0.07334327 | 21.7760427 | 3.915E-105 | 7.207E-103 |
| DYTN     | ENSG00000232125 | protein_coding | 0.7656262  | 1.62891494 | 0.39235582 | 4.15162683 | 3.3012E-05 | 6.5386E-05 |
| ASCL5    | ENSG00000232237 | protein_coding | 12.0995944 | 1.82166889 | 0.17884872 | 10.1855294 | 2.301E-24  | 1.7016E-23 |
| AJM1     | ENSG00000232434 | protein_coding | 421.160852 | 2.06422986 | 0.11422872 | 18.0710232 | 5.3905E-73 | 2.9037E-71 |
| HLA-DQB2 | ENSG00000232629 | protein_coding | 1797.27953 | 2.80072613 | 0.17846071 | 15.693797  | 1.6677E-55 | 4.8295E-54 |
| GOLGA8N  | ENSG00000232653 | protein_coding | 139.194603 | 1.15003352 | 0.12972073 | 8.86545668 | 7.6191E-19 | 4.1669E-18 |
| NPIPA9   | ENSG00000233024 | protein_coding | 4.71161687 | 1.81573678 | 0.21425726 | 8.47456374 | 2.3596E-17 | 1.1788E-16 |
| PHGR1    | ENSG00000233041 | protein_coding | 0.98771651 | 2.34185154 | 0.36285433 | 6.45397157 | 1.0896E-10 | 3.4577E-10 |
| PIRT     | ENSG00000233670 | protein_coding | 1.59553437 | 1.33774745 | 0.34049339 | 3.92885003 | 8.5353E-05 | 0.00016185 |
| H2BC15   | ENSG00000233822 | protein_coding | 125.927949 | 1.10850032 | 0.09500395 | 11.6679389 | 1.8587E-31 | 1.9756E-30 |
| RPS28    | ENSG00000233927 | protein_coding | 13126.3096 | 1.00746036 | 0.09894011 | 10.1825269 | 2.3732E-24 | 1.7535E-23 |
| PAGE2    | ENSG00000234068 | protein_coding | 1.63570476 | 3.09497744 | 0.48653337 | 6.36128506 | 2.0007E-10 | 6.2239E-10 |
| C16orf82 | ENSG00000234186 | protein_coding | 0.69941937 | 1.8950868  | 0.46306815 | 4.09245768 | 4.2683E-05 | 8.358E-05  |
| CCDC188  | ENSG00000234409 | protein_coding | 38.7038807 | 1.72713341 | 0.14752488 | 11.7074045 | 1.168E-31  | 1.2557E-30 |

|            |                 |                |            |            |            |            |            |            |
|------------|-----------------|----------------|------------|------------|------------|------------|------------|------------|
| C5orf58    | ENSG00000234511 | protein_coding | 28.6990828 | 2.93308831 | 0.17182787 | 17.069922  | 2.4853E-65 | 1.0082E-63 |
| HLA-B      | ENSG00000234745 | protein_coding | 176919.795 | 1.92345303 | 0.08378362 | 22.9573861 | 1.243E-116 | 3.081E-114 |
| IQCM       | ENSG00000234828 | protein_coding | 1.54265603 | 2.00414255 | 0.43922391 | 4.56291767 | 5.0448E-06 | 1.0805E-05 |
| APOC2      | ENSG00000234906 | protein_coding | 24.7691282 | 2.02126483 | 0.20195575 | 10.0084538 | 1.3992E-23 | 9.8908E-23 |
| AL158151.3 | ENSG00000235007 | protein_coding | 1.43626898 | 1.51116039 | 0.27913756 | 5.4136763  | 6.1744E-08 | 1.5717E-07 |
| RAMACL     | ENSG00000235272 | protein_coding | 7.65212149 | 1.15690403 | 0.3156151  | 3.66555346 | 0.0002468  | 0.00044534 |
| NFAM1      | ENSG00000235568 | protein_coding | 883.104165 | 2.10373365 | 0.1057681  | 19.8900584 | 4.9617E-88 | 4.6326E-86 |
| SLFN14     | ENSG00000236320 | protein_coding | 5.88919525 | 2.55891778 | 0.24080099 | 10.6266915 | 2.2392E-26 | 1.8495E-25 |
| PPIAL4G    | ENSG00000236334 | protein_coding | 1.23694878 | 1.81770248 | 0.32570711 | 5.5807884  | 2.3943E-08 | 6.297E-08  |
| SLC35G4    | ENSG00000236396 | protein_coding | 0.7080349  | 2.13071702 | 0.58770392 | 3.62549394 | 0.00028841 | 0.00051624 |
| AL354761.1 | ENSG00000236543 | protein_coding | 0.70186321 | 1.98633008 | 0.80172054 | 2.47758412 | 0.01322752 | 0.01945029 |
| CTAGE9     | ENSG00000236761 | protein_coding | 40.6711333 | 4.07395655 | 0.2356051  | 17.291462  | 5.4551E-67 | 2.3458E-65 |
| C3orf84    | ENSG00000236980 | protein_coding | 1.14926359 | 2.3079615  | 0.38445735 | 6.00316661 | 1.9351E-09 | 5.5828E-09 |
| C4orf51    | ENSG00000237136 | protein_coding | 7.92445749 | 1.34297059 | 0.25041319 | 5.36301853 | 8.1843E-08 | 2.0628E-07 |
| PATE4      | ENSG00000237353 | protein_coding | 1.21007076 | 1.90949569 | 0.41388186 | 4.61362499 | 3.9571E-06 | 8.5633E-06 |
| BHMG1      | ENSG00000237452 | protein_coding | 3.47004658 | 1.83290646 | 0.37961167 | 4.82837232 | 1.3765E-06 | 3.1082E-06 |
| HLA-DQA2   | ENSG00000237541 | protein_coding | 3119.41562 | 2.45007184 | 0.22090359 | 11.0911362 | 1.3852E-28 | 1.2794E-27 |
| KIFC1      | ENSG00000237649 | protein_coding | 316.803945 | 1.95018283 | 0.12235916 | 15.9381839 | 3.4421E-57 | 1.059E-55  |
| OR2I1P     | ENSG00000237988 | protein_coding | 1726.85668 | 3.81493788 | 0.21495505 | 17.747608  | 1.7985E-70 | 8.7802E-69 |
| ETDA       | ENSG00000238210 | protein_coding | 0.89315475 | 2.3314206  | 0.31281732 | 7.4529781  | 9.1256E-14 | 3.6088E-13 |
| PAGE2B     | ENSG00000238269 | protein_coding | 1.42013157 | 2.38282165 | 0.33033514 | 7.21334591 | 5.4593E-13 | 2.0425E-12 |
| ALKBH6     | ENSG00000239382 | protein_coding | 154.2441   | 1.68617822 | 0.11179615 | 15.0826139 | 2.1076E-51 | 5.2736E-50 |
| OR1J4      | ENSG00000239590 | protein_coding | 0.71544767 | 1.84310503 | 0.45680892 | 4.03473961 | 5.4663E-05 | 0.00010577 |
| STPG4      | ENSG00000239605 | protein_coding | 4.99457998 | 1.79992576 | 0.23473183 | 7.66800885 | 1.7469E-14 | 7.2377E-14 |
| PRR20G     | ENSG00000239620 | protein_coding | 1.22255308 | 2.91988799 | 0.42271084 | 6.90753034 | 4.9316E-12 | 1.7268E-11 |

|            |                 |                |            |            |            |            |            |            |
|------------|-----------------|----------------|------------|------------|------------|------------|------------|------------|
| MEIKIN     | ENSG00000239642 | protein_coding | 1.70256406 | 1.55794219 | 0.27886928 | 5.58663975 | 2.3151E-08 | 6.0973E-08 |
| CDRT4      | ENSG00000239704 | protein_coding | 35.6003175 | 1.5023875  | 0.14876224 | 10.0992534 | 5.5664E-24 | 4.0222E-23 |
| APOBEC3G   | ENSG00000239713 | protein_coding | 1611.76296 | 2.32419328 | 0.1135234  | 20.4732534 | 3.7288E-93 | 4.2947E-91 |
| TLR9       | ENSG00000239732 | protein_coding | 3.53289734 | 1.51794107 | 0.18970475 | 8.00159754 | 1.2282E-15 | 5.5045E-15 |
| DEFA3      | ENSG00000239839 | protein_coding | 3.55049226 | 1.88510841 | 0.40462997 | 4.65884528 | 3.1799E-06 | 6.942E-06  |
| LILRA4     | ENSG00000239961 | protein_coding | 77.9781672 | 2.51393424 | 0.19422535 | 12.9433892 | 2.5608E-38 | 3.7231E-37 |
| LILRA2     | ENSG00000239998 | protein_coding | 267.916082 | 1.88737349 | 0.11998085 | 15.7306221 | 9.329E-56  | 2.7222E-54 |
| AMY2B      | ENSG00000240038 | protein_coding | 550.86328  | 1.75128687 | 0.15841416 | 11.055116  | 2.0707E-28 | 1.8958E-27 |
| LY6G5B     | ENSG00000240053 | protein_coding | 145.978775 | 2.35374311 | 0.16056025 | 14.6595631 | 1.1702E-48 | 2.6284E-47 |
| PSMB9      | ENSG00000240065 | protein_coding | 3992.63675 | 2.21818368 | 0.1040473  | 21.3189936 | 7.567E-101 | 1.1719E-98 |
| PCDHGC3    | ENSG00000240184 | protein_coding | 1788.82381 | 1.10171574 | 0.1099973  | 10.0158436 | 1.2985E-23 | 9.1986E-23 |
| UGT1A5     | ENSG00000240224 | protein_coding | 1.99919485 | 2.78480711 | 0.37829395 | 7.36149    | 1.8187E-13 | 7.0468E-13 |
| ACAD11     | ENSG00000240303 | protein_coding | 495.825105 | 1.11985465 | 0.15118098 | 7.40737812 | 1.2882E-13 | 5.0434E-13 |
| KIR3DL2    | ENSG00000240403 | protein_coding | 8.55856819 | 2.36506899 | 0.1995286  | 11.8532829 | 2.0692E-32 | 2.3018E-31 |
| TNFRSF13B  | ENSG00000240505 | protein_coding | 17.1597451 | 1.03117522 | 0.23909659 | 4.31279767 | 1.612E-05  | 3.2866E-05 |
| PNMA2      | ENSG00000240694 | protein_coding | 4385.58278 | 2.81848143 | 0.14865653 | 18.959688  | 3.6732E-80 | 2.5865E-78 |
| LRRD1      | ENSG00000240720 | protein_coding | 5.36630396 | 1.67894063 | 0.20606039 | 8.14780872 | 3.7058E-16 | 1.7132E-15 |
| PCDHGC5    | ENSG00000240764 | protein_coding | 37.0820132 | 2.15333785 | 0.16440021 | 13.0981454 | 3.374E-39  | 5.1079E-38 |
| MIF        | ENSG00000240972 | protein_coding | 3111.61602 | 1.13374216 | 0.11842142 | 9.57379269 | 1.0305E-21 | 6.6118E-21 |
| HLA-DOB    | ENSG00000241106 | protein_coding | 280.883559 | 2.16664853 | 0.17339951 | 12.4951251 | 7.9371E-36 | 1.0375E-34 |
| RPL36A     | ENSG00000241343 | protein_coding | 3879.66739 | 1.26458198 | 0.09688749 | 13.0520668 | 6.1847E-39 | 9.2349E-38 |
| EGFL8      | ENSG00000241404 | protein_coding | 103.815076 | 1.87252345 | 0.1652063  | 11.3344556 | 8.8581E-30 | 8.697E-29  |
| AC244197.3 | ENSG00000241489 | protein_coding | 71.9608427 | 1.9187406  | 0.16299506 | 11.7717713 | 5.4567E-32 | 5.9543E-31 |
| UGT1A1     | ENSG00000241635 | protein_coding | 21.8831094 | 2.22621015 | 0.22346292 | 9.9623246  | 2.2279E-23 | 1.5573E-22 |
| PLEKHO2    | ENSG00000241839 | protein_coding | 3862.76132 | 1.02924175 | 0.07405175 | 13.8989523 | 6.4275E-44 | 1.1833E-42 |

|            |                 |                |            |            |            |            |            |            |
|------------|-----------------|----------------|------------|------------|------------|------------|------------|------------|
| KIR3DL3    | ENSG00000242019 | protein_coding | 0.62472241 | 1.96278829 | 0.46602649 | 4.2117526  | 2.534E-05  | 5.076E-05  |
| HYPK       | ENSG00000242028 | protein_coding | 146.489979 | 1.38450054 | 0.12006791 | 11.5309789 | 9.2091E-31 | 9.4294E-30 |
| MTFP1      | ENSG00000242114 | protein_coding | 769.82017  | 1.63583698 | 0.10380675 | 15.7584842 | 6.0056E-56 | 1.7614E-54 |
| PSG2       | ENSG00000242221 | protein_coding | 1.12074556 | 2.62324605 | 0.47806484 | 5.48721806 | 4.0831E-08 | 1.0534E-07 |
| BGLAP      | ENSG00000242252 | protein_coding | 38.7334506 | 2.30127715 | 0.17325167 | 13.2828568 | 2.9107E-40 | 4.5916E-39 |
| UGT1A8     | ENSG00000242366 | protein_coding | 28.3248813 | 2.78072526 | 0.36318228 | 7.65655543 | 1.9099E-14 | 7.8938E-14 |
| PCDHGC4    | ENSG00000242419 | protein_coding | 26.7053773 | 1.85282174 | 0.15674906 | 11.8203049 | 3.0657E-32 | 3.388E-31  |
| UGT1A10    | ENSG00000242515 | protein_coding | 51.2611847 | 3.91191339 | 0.41325425 | 9.46611781 | 2.9044E-21 | 1.8179E-20 |
| HLA-DMB    | ENSG00000242574 | protein_coding | 4711.31044 | 1.08289383 | 0.10344335 | 10.4684722 | 1.2057E-25 | 9.5809E-25 |
| STRC       | ENSG00000242866 | protein_coding | 8.49842825 | 2.77531476 | 0.26807251 | 10.3528509 | 4.0621E-25 | 3.1254E-24 |
| ERVW-1     | ENSG00000242950 | protein_coding | 19.7811486 | 1.18577888 | 0.17893142 | 6.62700219 | 3.4257E-11 | 1.1308E-10 |
| EIF4EBP3   | ENSG00000243056 | protein_coding | 615.104224 | 1.27695414 | 0.10162565 | 12.5652735 | 3.2774E-36 | 4.3661E-35 |
| PSG11      | ENSG00000243130 | protein_coding | 1.21093868 | 2.19991469 | 0.50746051 | 4.33514457 | 1.4566E-05 | 2.9847E-05 |
| UGT1A3     | ENSG00000243135 | protein_coding | 26.5417745 | 4.2919162  | 0.29551834 | 14.5233496 | 8.6193E-48 | 1.8568E-46 |
| KRTAP10-11 | ENSG00000243489 | protein_coding | 0.83145642 | 1.82620913 | 0.63699838 | 2.8668976  | 0.00414517 | 0.00651977 |
| WFDC6      | ENSG00000243543 | protein_coding | 0.7338305  | 1.49011524 | 0.53303262 | 2.79554232 | 0.00518127 | 0.00804998 |
| IL10RB     | ENSG00000243646 | protein_coding | 2690.08323 | 1.02287912 | 0.0592358  | 17.2679223 | 8.2043E-67 | 3.5051E-65 |
| CFB        | ENSG00000243649 | protein_coding | 1410.15659 | 1.33912508 | 0.14644674 | 9.14410958 | 6.0123E-20 | 3.5029E-19 |
| AC006254.1 | ENSG00000243696 | protein_coding | 62.9764406 | 1.74766513 | 0.18499993 | 9.44684235 | 3.4921E-21 | 2.1732E-20 |
| PLA2G4B    | ENSG00000243708 | protein_coding | 30.1443159 | 1.83838863 | 0.1799509  | 10.2160567 | 1.6804E-24 | 1.2513E-23 |
| LEFTY1     | ENSG00000243709 | protein_coding | 84.8216299 | 1.03084261 | 0.28924946 | 3.56385314 | 0.00036545 | 0.00064702 |
| NP1PB5     | ENSG00000243716 | protein_coding | 263.46225  | 2.93353815 | 0.19118376 | 15.3440761 | 3.8804E-53 | 1.0366E-51 |
| KIR2DL3    | ENSG00000243772 | protein_coding | 11.6756083 | 2.56158144 | 0.18470912 | 13.8681917 | 9.8735E-44 | 1.8075E-42 |
| JMJD7      | ENSG00000243789 | protein_coding | 9.19522683 | 1.03262716 | 0.14831216 | 6.96252546 | 3.3423E-12 | 1.1837E-11 |
| APOBEC3D   | ENSG00000243811 | protein_coding | 394.996873 | 2.01044552 | 0.10795517 | 18.6229665 | 2.0929E-77 | 1.3381E-75 |



|                 |                 |                |            |            |            |            |            |            |
|-----------------|-----------------|----------------|------------|------------|------------|------------|------------|------------|
| IFITM10         | ENSG00000244242 | protein_coding | 715.052181 | 1.39436656 | 0.15949459 | 8.74240665 | 2.282E-18  | 1.212E-17  |
| AL645922.1      | ENSG00000244255 | protein_coding | 1.15225372 | 1.75894741 | 0.33169878 | 5.30284556 | 1.1401E-07 | 2.8352E-07 |
| KRTAP5-7        | ENSG00000244411 | protein_coding | 3.47169864 | 1.16443474 | 0.24852722 | 4.68534075 | 2.7949E-06 | 6.1344E-06 |
| UGT1A4          | ENSG00000244474 | protein_coding | 4.07168974 | 3.18672503 | 0.37705246 | 8.45167541 | 2.8715E-17 | 1.4274E-16 |
| LILRA6          | ENSG00000244482 | protein_coding | 125.047972 | 2.50302734 | 0.13540865 | 18.4849892 | 2.7275E-76 | 1.6828E-74 |
| APOBEC3C        | ENSG00000244509 | protein_coding | 3644.07213 | 2.09395298 | 0.11259391 | 18.5973916 | 3.3733E-77 | 2.1477E-75 |
| PTCHD4          | ENSG00000244694 | protein_coding | 296.361753 | 1.11633799 | 0.161957   | 6.8928049  | 5.4703E-12 | 1.9085E-11 |
| C4A             | ENSG00000244731 | protein_coding | 4635.80016 | 1.68899419 | 0.16864124 | 10.0153095 | 1.3055E-23 | 9.247E-23  |
| CRYBB2          | ENSG00000244752 | protein_coding | 15.1095432 | 1.77421587 | 0.16852548 | 10.527879  | 6.4266E-26 | 5.1748E-25 |
| CEBPA           | ENSG00000245848 | protein_coding | 603.57169  | 1.46777468 | 0.1369203  | 10.7199205 | 8.2074E-27 | 6.9403E-26 |
| UBAP1L          | ENSG00000246922 | protein_coding | 315.90157  | 2.16345887 | 0.14260579 | 15.1709045 | 5.5112E-52 | 1.4209E-50 |
| INSL3           | ENSG00000248099 | protein_coding | 22.5186815 | 1.45042307 | 0.18814258 | 7.70916963 | 1.2664E-14 | 5.2968E-14 |
| POU5F2          | ENSG00000248483 | protein_coding | 9.51160677 | 2.6425549  | 0.25432637 | 10.3904085 | 2.7418E-25 | 2.1346E-24 |
| STIMATE-MUSTN1  | ENSG00000248592 | protein_coding | 24.8180576 | 1.04364922 | 0.14961354 | 6.97563336 | 3.045E-12  | 1.0824E-11 |
| ACTN3           | ENSG00000248746 | protein_coding | 6.67994529 | 1.53670114 | 0.20768321 | 7.39925541 | 1.3695E-13 | 5.3498E-13 |
| AC004997.1      | ENSG00000248751 | protein_coding | 7.9756449  | 1.10701805 | 0.16504652 | 6.7073091  | 1.9825E-11 | 6.6494E-11 |
| TNFSF12-TNFSF13 | ENSG00000248871 | protein_coding | 5.41444423 | 1.02754507 | 0.16525324 | 6.21800245 | 5.0352E-10 | 1.5227E-09 |
| AL159163.1      | ENSG00000249141 | protein_coding | 13.8173894 | 2.23908932 | 0.16076635 | 13.9275995 | 4.3059E-44 | 7.9978E-43 |
| ATP5MGL         | ENSG00000249222 | protein_coding | 3.5719455  | 1.30450038 | 0.24394358 | 5.34754957 | 8.9153E-08 | 2.2384E-07 |
| NAIP            | ENSG00000249437 | protein_coding | 103.37371  | 1.36206179 | 0.1476187  | 9.22689222 | 2.786E-20  | 1.649E-19  |
| ECSCR           | ENSG00000249751 | protein_coding | 589.368758 | 1.26767713 | 0.11120457 | 11.3995054 | 4.205E-30  | 4.1787E-29 |
| TERB1           | ENSG00000249961 | protein_coding | 4.11830772 | 1.63109611 | 0.2199479  | 7.4158294  | 1.2087E-13 | 4.7433E-13 |
| YJEFN3          | ENSG00000250067 | protein_coding | 182.642523 | 2.08683308 | 0.18197996 | 11.4673783 | 1.924E-30  | 1.9457E-29 |

|            |                 |                |            |            |            |            |            |            |
|------------|-----------------|----------------|------------|------------|------------|------------|------------|------------|
| TRIM75P    | ENSG00000250374 | protein_coding | 2.18146821 | 2.14018472 | 0.31143524 | 6.87200573 | 6.3305E-12 | 2.2008E-11 |
| CDK3       | ENSG00000250506 | protein_coding | 32.8164825 | 2.39955875 | 0.17055037 | 14.0695018 | 5.848E-45  | 1.1203E-43 |
| REELD1     | ENSG00000250673 | protein_coding | 12.2173372 | 2.34184809 | 0.21563165 | 10.8604098 | 1.7795E-27 | 1.5535E-26 |
| AC010255.3 | ENSG00000250803 | protein_coding | 1.07216812 | 1.82457404 | 0.35501939 | 5.1393645  | 2.7567E-07 | 6.6398E-07 |
| SHANK3     | ENSG00000251322 | protein_coding | 4740.08389 | 1.21262422 | 0.10788266 | 11.2402146 | 2.5875E-29 | 2.4914E-28 |
| AC005324.3 | ENSG00000251537 | protein_coding | 3.90536522 | 2.32442381 | 0.26788255 | 8.67702574 | 4.0625E-18 | 2.1264E-17 |
| PTX4       | ENSG00000251692 | protein_coding | 4.98289772 | 2.16378674 | 0.23026576 | 9.39691044 | 5.6189E-21 | 3.4565E-20 |
| TMEM200B   | ENSG00000253304 | protein_coding | 786.329237 | 1.17768671 | 0.1190135  | 9.89540472 | 4.3584E-23 | 3.0017E-22 |
| SERPINE3   | ENSG00000253309 | protein_coding | 18.7196396 | 1.41156386 | 0.1368242  | 10.3166241 | 5.9271E-25 | 4.5103E-24 |
| PCDHGA5    | ENSG00000253485 | protein_coding | 128.822087 | 1.02450158 | 0.16768785 | 6.1095755  | 9.9896E-10 | 2.9502E-09 |
| PRSS51     | ENSG00000253649 | protein_coding | 29.0199019 | 1.89996103 | 0.1759627  | 10.7975217 | 3.5362E-27 | 3.0465E-26 |
| ETV3L      | ENSG00000253831 | protein_coding | 2.74008424 | 2.77658188 | 0.34754517 | 7.9891251  | 1.359E-15  | 6.079E-15  |
| PCDHGB2    | ENSG00000253910 | protein_coding | 324.541077 | 1.62110837 | 0.19968741 | 8.11823011 | 4.7303E-16 | 2.1734E-15 |
| PCDHGB7    | ENSG00000254122 | protein_coding | 1019.96522 | 1.26136844 | 0.1811545  | 6.9629427  | 3.3324E-12 | 1.1804E-11 |
| NPIPB11    | ENSG00000254206 | protein_coding | 77.3756561 | 2.33912145 | 0.18280787 | 12.7955183 | 1.7369E-37 | 2.4521E-36 |
| CHKB-CPT1B | ENSG00000254413 | protein_coding | 63.8970391 | 1.71474802 | 0.17009768 | 10.0809607 | 6.7067E-24 | 4.8219E-23 |
| SIGLEC14   | ENSG00000254415 | protein_coding | 239.198783 | 1.61251896 | 0.15177163 | 10.6246405 | 2.2889E-26 | 1.8895E-25 |
| PBOV1      | ENSG00000254440 | protein_coding | 1.51029465 | 1.55534088 | 0.36332314 | 4.28087483 | 1.8616E-05 | 3.775E-05  |
| SIGLEC12   | ENSG00000254521 | protein_coding | 44.5311457 | 2.59224997 | 0.23204816 | 11.171172  | 5.6431E-29 | 5.3315E-28 |
| PABPC4L    | ENSG00000254535 | protein_coding | 564.911548 | 1.27355434 | 0.1197661  | 10.6336794 | 2.0775E-26 | 1.719E-25  |
| AL360181.3 | ENSG00000254536 | protein_coding | 1.30882267 | 1.55788436 | 0.28025012 | 5.55890693 | 2.7147E-08 | 7.1099E-08 |
| ARMS2      | ENSG00000254636 | protein_coding | 4.73386211 | 1.49455056 | 0.19401823 | 7.70314489 | 1.3276E-14 | 5.5446E-14 |
| RTL1       | ENSG00000254656 | protein_coding | 9.18127403 | 4.34570224 | 0.60229404 | 7.21525025 | 5.3835E-13 | 2.0151E-12 |
| IGLL5      | ENSG00000254709 | protein_coding | 1535.23827 | 2.18625758 | 0.27924982 | 7.8290385  | 4.9162E-15 | 2.1167E-14 |
| AP001931.1 | ENSG00000254732 | protein_coding | 16.3495671 | 1.24955936 | 0.15888442 | 7.86458056 | 3.7034E-15 | 1.6061E-14 |

|              |                 |                |            |            |            |            |            |            |
|--------------|-----------------|----------------|------------|------------|------------|------------|------------|------------|
| EEF1G        | ENSG00000254772 | protein_coding | 25.4960131 | 1.03841375 | 0.14356839 | 7.23288556 | 4.7284E-13 | 1.7775E-12 |
| AP000781.2   | ENSG00000254979 | protein_coding | 16.6025481 | 3.09250275 | 0.18093755 | 17.0915474 | 1.7156E-65 | 6.9969E-64 |
| STX16-NPEPL1 | ENSG00000254995 | protein_coding | 65.8760334 | 1.98903384 | 0.17582507 | 11.3125726 | 1.1371E-29 | 1.1111E-28 |
| SAA2-SAA4    | ENSG00000255071 | protein_coding | 81.3686441 | 4.25126045 | 0.51237162 | 8.2972208  | 1.0658E-16 | 5.1088E-16 |
| AC005324.4   | ENSG00000255104 | protein_coding | 1.88498011 | 3.09419532 | 0.33046045 | 9.36328474 | 7.7296E-21 | 4.7187E-20 |
| GLYATL1B     | ENSG00000255151 | protein_coding | 1.31496917 | 2.30069669 | 0.3301544  | 6.96854772 | 3.2023E-12 | 1.1364E-11 |
| CARD17       | ENSG00000255221 | protein_coding | 4.66995371 | 3.05174798 | 0.2720808  | 11.2163296 | 3.3905E-29 | 3.2455E-28 |
| AL096711.2   | ENSG00000255330 | protein_coding | 24.8539293 | 1.61275369 | 0.15817587 | 10.1959525 | 2.0671E-24 | 1.534E-23  |
| AL133352.1   | ENSG00000255339 | protein_coding | 7.1675348  | 1.82103349 | 0.18316009 | 9.94230493 | 2.7245E-23 | 1.8958E-22 |
| TAS2R43      | ENSG00000255374 | protein_coding | 2.58325113 | 1.34483118 | 0.29145409 | 4.61421274 | 3.9459E-06 | 8.5403E-06 |
| EBLN2        | ENSG00000255423 | protein_coding | 39.8108987 | 1.2453635  | 0.13624281 | 9.14076483 | 6.2012E-20 | 3.6098E-19 |
| AC135050.2   | ENSG00000255439 | protein_coding | 5.86552963 | 1.37539921 | 0.16645612 | 8.26283331 | 1.4225E-16 | 6.7597E-16 |
| NPIP8        | ENSG00000255524 | protein_coding | 1.42388659 | 1.87639633 | 0.32337176 | 5.80259807 | 6.5295E-09 | 1.8007E-08 |
| LY6G6E       | ENSG00000255552 | protein_coding | 0.54675101 | 1.32042739 | 0.34899    | 3.78356795 | 0.0001546  | 0.00028524 |
| OR10G2       | ENSG00000255582 | protein_coding | 0.58370029 | 1.79899843 | 0.5014661  | 3.58747763 | 0.00033389 | 0.00059348 |
| RAB44        | ENSG00000255587 | protein_coding | 13.8550765 | 1.70179853 | 0.14682988 | 11.5902738 | 4.6165E-31 | 4.8108E-30 |
| AC068775.1   | ENSG00000255641 | protein_coding | 0.52414301 | 1.39512522 | 0.33849576 | 4.12154415 | 3.7634E-05 | 7.4125E-05 |
| AP002373.1   | ENSG00000255663 | protein_coding | 2.12609177 | 1.50541015 | 0.2197394  | 6.85088864 | 7.3393E-12 | 2.5403E-11 |
| AC011462.1   | ENSG00000255730 | protein_coding | 8.79939579 | 2.77649195 | 0.19366902 | 14.336273  | 1.2984E-46 | 2.6703E-45 |
| KLRC4-KLRK1  | ENSG00000255819 | protein_coding | 14.980232  | 2.29129197 | 0.19773005 | 11.5879804 | 4.7418E-31 | 4.9369E-30 |
| TIFAB        | ENSG00000255833 | protein_coding | 42.3323976 | 2.42431415 | 0.19211913 | 12.6188065 | 1.6632E-36 | 2.2498E-35 |
| TAS2R20      | ENSG00000255837 | protein_coding | 27.7036891 | 1.98122255 | 0.15042909 | 13.170475  | 1.2978E-39 | 1.997E-38  |
| CYP2A6       | ENSG00000255974 | protein_coding | 6.26885815 | 1.35101641 | 0.20292299 | 6.65777895 | 2.78E-11   | 9.2312E-11 |
| TAS2R30      | ENSG00000256188 | protein_coding | 2.47489883 | 1.55545773 | 0.27693001 | 5.61679005 | 1.9454E-08 | 5.1569E-08 |
| SMIM3        | ENSG00000256235 | protein_coding | 4044.32205 | 1.15313122 | 0.16411005 | 7.02657275 | 2.1167E-12 | 7.6103E-12 |

|            |                 |                |            |            |            |            |            |            |
|------------|-----------------|----------------|------------|------------|------------|------------|------------|------------|
| TAS2R31    | ENSG00000256436 | protein_coding | 12.6863654 | 1.31313491 | 0.18519271 | 7.09064025 | 1.3349E-12 | 4.8726E-12 |
| AP003419.1 | ENSG00000256514 | protein_coding | 0.94701503 | 1.59175383 | 0.3780344  | 4.21060579 | 2.5469E-05 | 5.1005E-05 |
| POLG2      | ENSG00000256525 | protein_coding | 513.603475 | 1.09503912 | 0.07858537 | 13.9343885 | 3.9154E-44 | 7.2814E-43 |
| OR13A1     | ENSG00000256574 | protein_coding | 7.54829551 | 1.83659912 | 0.27821075 | 6.60146704 | 4.0711E-11 | 1.3346E-10 |
| CLEC12B    | ENSG00000256660 | protein_coding | 13.4177908 | 3.73797685 | 0.24920093 | 14.9998514 | 7.3584E-51 | 1.8029E-49 |
| PGA5       | ENSG00000256713 | protein_coding | 68.757743  | 2.33848723 | 0.25051088 | 9.33487305 | 1.0111E-20 | 6.1351E-20 |
| STH        | ENSG00000256762 | protein_coding | 2.2774895  | 3.15669213 | 0.35540429 | 8.88197533 | 6.5683E-19 | 3.6064E-18 |
| KLRF2      | ENSG00000256797 | protein_coding | 4.33313424 | 3.39629345 | 0.36798541 | 9.22942416 | 2.7209E-20 | 1.6115E-19 |
| SLC5A8     | ENSG00000256870 | protein_coding | 2096.11362 | 1.50320609 | 0.26920113 | 5.58395171 | 2.3511E-08 | 6.1881E-08 |
| AC069503.2 | ENSG00000256950 | protein_coding | 9.92093361 | 1.89990885 | 0.19561997 | 9.71224387 | 2.6738E-22 | 1.7654E-21 |
| KHDC1L     | ENSG00000256980 | protein_coding | 1.2120793  | 2.15504321 | 0.35341234 | 6.09781539 | 1.0753E-09 | 3.1674E-09 |
| GPR142     | ENSG00000257008 | protein_coding | 1.55040943 | 1.96369901 | 0.29420995 | 6.67448199 | 2.4811E-11 | 8.2722E-11 |
| HP         | ENSG00000257017 | protein_coding | 1896.75383 | 5.69826895 | 0.39572644 | 14.3995154 | 5.2108E-47 | 1.0897E-45 |
| TAS2R38    | ENSG00000257138 | protein_coding | 0.65111011 | 1.78351781 | 0.53431533 | 3.33794992 | 0.00084399 | 0.00143656 |
| AL928654.3 | ENSG00000257341 | protein_coding | 3.45289261 | 1.67601435 | 0.24202659 | 6.92491831 | 4.3623E-12 | 1.533E-11  |
| AL157935.2 | ENSG00000257524 | protein_coding | 24.8253232 | 2.14959431 | 0.16950181 | 12.6818369 | 7.4564E-37 | 1.0225E-35 |
| MGAM2      | ENSG00000257743 | protein_coding | 81.8732925 | 2.06215199 | 0.19573382 | 10.5354917 | 5.9273E-26 | 4.787E-25  |
| OR9A4      | ENSG00000258083 | protein_coding | 0.87045512 | 2.09910692 | 0.3948424  | 5.31631591 | 1.0589E-07 | 2.6402E-07 |
| PRSS58     | ENSG00000258223 | protein_coding | 0.49454378 | 1.52493873 | 0.45468759 | 3.35381645 | 0.00079705 | 0.00135984 |
| CLEC5A     | ENSG00000258227 | protein_coding | 303.040412 | 2.04717148 | 0.15777559 | 12.9752101 | 1.6913E-38 | 2.4771E-37 |
| AC009779.3 | ENSG00000258311 | protein_coding | 206.090571 | 2.00607289 | 0.11387043 | 17.6171539 | 1.8193E-69 | 8.5978E-68 |
| C17orf49   | ENSG00000258315 | protein_coding | 87.2172582 | 1.00066913 | 0.08404754 | 11.9059897 | 1.1015E-32 | 1.2391E-31 |
| RTEL1      | ENSG00000258366 | protein_coding | 86.4509152 | 1.13824018 | 0.09522751 | 11.9528502 | 6.2736E-33 | 7.1557E-32 |
| PPT2-EGFL8 | ENSG00000258388 | protein_coding | 66.6871901 | 1.18215012 | 0.1158085  | 10.207801  | 1.8296E-24 | 1.3607E-23 |
| AC012651.1 | ENSG00000258461 | protein_coding | 128.621238 | 1.72453109 | 0.1592903  | 10.826341  | 2.5827E-27 | 2.2423E-26 |

|               |                 |                |            |            |            |            |            |            |
|---------------|-----------------|----------------|------------|------------|------------|------------|------------|------------|
| BCL2L2-PABPN1 | ENSG00000258643 | protein_coding | 13.747882  | 1.01200527 | 0.13447711 | 7.52548325 | 5.2526E-14 | 2.1116E-13 |
| C20orf141     | ENSG00000258713 | protein_coding | 1.54607798 | 2.58359359 | 0.49467231 | 5.22283854 | 1.762E-07  | 4.3161E-07 |
| AL121594.1    | ENSG00000258790 | protein_coding | 9.97212863 | 2.01500288 | 0.19774903 | 10.1896981 | 2.2045E-24 | 1.6326E-23 |
| RNASE4        | ENSG00000258818 | protein_coding | 289.987558 | 1.01252576 | 0.12508796 | 8.09451    | 5.7495E-16 | 2.627E-15  |
| MC1R          | ENSG00000258839 | protein_coding | 236.337491 | 1.58271752 | 0.13130261 | 12.0539681 | 1.8483E-33 | 2.1604E-32 |
| AC007040.2    | ENSG00000258881 | protein_coding | 8.85798975 | 1.24026318 | 0.21676973 | 5.7215699  | 1.0554E-08 | 2.8602E-08 |
| TUBB3         | ENSG00000258947 | protein_coding | 61.311291  | 1.59245529 | 0.22737405 | 7.00368094 | 2.4932E-12 | 8.9185E-12 |
| TMEM179       | ENSG00000258986 | protein_coding | 227.401141 | 3.9893224  | 0.27840649 | 14.3291287 | 1.4391E-46 | 2.9544E-45 |
| AL163636.2    | ENSG00000259171 | protein_coding | 37.3119072 | 1.14526678 | 0.1332218  | 8.59669179 | 8.2047E-18 | 4.2099E-17 |
| SLC35G6       | ENSG00000259224 | protein_coding | 3.59092371 | 1.13607641 | 0.23280604 | 4.87992662 | 1.0613E-06 | 2.4215E-06 |
| ZHX1-C8orf76  | ENSG00000259305 | protein_coding | 32.0684487 | 1.03913593 | 0.10126931 | 10.2611136 | 1.0548E-24 | 7.9439E-24 |
| AC087632.2    | ENSG00000259316 | protein_coding | 4.06335824 | 1.0790967  | 0.17506933 | 6.1638249  | 7.1008E-10 | 2.1228E-09 |
| GH1           | ENSG00000259384 | protein_coding | 1.89906188 | 1.75226737 | 0.27144281 | 6.45538325 | 1.0795E-10 | 3.4278E-10 |
| AL136295.5    | ENSG00000259529 | protein_coding | 30.2947093 | 1.64157123 | 0.14775291 | 11.1102465 | 1.1185E-28 | 1.0402E-27 |
| BLID          | ENSG00000259571 | protein_coding | 0.82103504 | 1.91761112 | 0.45696516 | 4.1964055  | 2.7118E-05 | 5.4146E-05 |
| AC136428.1    | ENSG00000259680 | protein_coding | 5.2387025  | 1.40876294 | 0.3640782  | 3.86939653 | 0.00010911 | 0.00020463 |
| AC107871.1    | ENSG00000260007 | protein_coding | 0.67750902 | 1.46289377 | 0.30444526 | 4.80511266 | 1.5466E-06 | 3.476E-06  |
| AC020636.2    | ENSG00000260234 | protein_coding | 0.81729851 | 2.2391728  | 0.36743708 | 6.09403059 | 1.101E-09  | 3.2393E-09 |
| AC093525.2    | ENSG00000260272 | protein_coding | 7.4751514  | 1.21917862 | 0.1823741  | 6.68504252 | 2.3086E-11 | 7.7128E-11 |
| SCX           | ENSG00000260428 | protein_coding | 29.4943321 | 1.02147839 | 0.17093357 | 5.97587918 | 2.2885E-09 | 6.5666E-09 |
| KCNJ18        | ENSG00000260458 | protein_coding | 1.57995359 | 1.45759456 | 0.3770127  | 3.86616834 | 0.00011056 | 0.00020719 |
| AC009690.1    | ENSG00000260729 | protein_coding | 24.7169163 | 1.14044542 | 0.1720746  | 6.62762203 | 3.4114E-11 | 1.1262E-10 |
| AL049634.2    | ENSG00000260861 | protein_coding | 1.49103126 | 2.92188951 | 0.31347194 | 9.32105595 | 1.1519E-20 | 6.9753E-20 |
| SULT1A3       | ENSG00000261052 | protein_coding | 4.16727044 | 2.40106046 | 0.26070909 | 9.20973033 | 3.2695E-20 | 1.9264E-19 |
| CLEC19A       | ENSG00000261210 | protein_coding | 0.70062669 | 1.15974893 | 0.50311274 | 2.3051472  | 0.02115833 | 0.03024193 |

|            |                 |                |            |            |            |            |            |            |
|------------|-----------------|----------------|------------|------------|------------|------------|------------|------------|
| MUC22      | ENSG00000261272 | protein_coding | 5.39692752 | 2.63859993 | 0.30633361 | 8.61348484 | 7.0873E-18 | 3.6516E-17 |
| AC010325.1 | ENSG00000261341 | protein_coding | 2.75769514 | 2.15168724 | 0.27395323 | 7.85421374 | 4.0229E-15 | 1.7412E-14 |
| PECAM1     | ENSG00000261371 | protein_coding | 37507.2482 | 1.22195149 | 0.10128347 | 12.0646688 | 1.6231E-33 | 1.904E-32  |
| TEN1-CDK3  | ENSG00000261408 | protein_coding | 90.1061909 | 2.00308186 | 0.13813169 | 14.5012474 | 1.1897E-47 | 2.5532E-46 |
| TMEM249    | ENSG00000261587 | protein_coding | 4.72561976 | 2.37669515 | 0.29115928 | 8.16286934 | 3.2716E-16 | 1.5175E-15 |
| TPBGL      | ENSG00000261594 | protein_coding | 87.4725725 | 2.34345691 | 0.21125014 | 11.0932799 | 1.3524E-28 | 1.2504E-27 |
| GOLGA6L7   | ENSG00000261649 | protein_coding | 18.5760217 | 3.11379236 | 0.35187896 | 8.84904398 | 8.8272E-19 | 4.8104E-18 |
| HPR        | ENSG00000261701 | protein_coding | 25.125943  | 1.38216419 | 0.38538469 | 3.58645329 | 0.00033521 | 0.00059566 |
| AL031708.1 | ENSG00000261732 | protein_coding | 15.1598056 | 2.22379903 | 0.19283511 | 11.5321273 | 9.087E-31  | 9.3106E-30 |
| GOLGA8S    | ENSG00000261739 | protein_coding | 5.85725278 | 1.53330387 | 0.20343601 | 7.5370327  | 4.8079E-14 | 1.9367E-13 |
| MIA        | ENSG00000261857 | protein_coding | 4.21324288 | 1.25688426 | 0.28404153 | 4.42500177 | 9.6441E-06 | 2.0115E-05 |
| AC040162.1 | ENSG00000261884 | protein_coding | 154.158123 | 2.10300521 | 0.13055414 | 16.1082993 | 2.2308E-58 | 7.1611E-57 |
| LINC00514  | ENSG00000262152 | protein_coding | 17.2043853 | 1.90404529 | 0.16990836 | 11.206307  | 3.7971E-29 | 3.6225E-28 |
| CORO7      | ENSG00000262246 | protein_coding | 785.023466 | 1.54309949 | 0.09084375 | 16.986304  | 1.0372E-64 | 4.1274E-63 |
| MMP12      | ENSG00000262406 | protein_coding | 43.1520399 | 2.12524171 | 0.33240315 | 6.39356673 | 1.6206E-10 | 5.08E-10   |
| CCER2      | ENSG00000262484 | protein_coding | 24.8490858 | 2.62484488 | 0.21440863 | 12.2422541 | 1.8483E-34 | 2.263E-33  |
| C19orf84   | ENSG00000262874 | protein_coding | 12.0531202 | 1.98915037 | 0.17024751 | 11.6838736 | 1.5411E-31 | 1.6456E-30 |
| DPEP2NB    | ENSG00000263201 | protein_coding | 1.11117734 | 2.18688089 | 0.41292144 | 5.29611854 | 1.1829E-07 | 2.9375E-07 |
| AC119396.1 | ENSG00000263264 | protein_coding | 25.53923   | 1.14656334 | 0.13659368 | 8.39397064 | 4.6999E-17 | 2.3033E-16 |
| FAM72C     | ENSG00000263513 | protein_coding | 6.68638826 | 2.35961508 | 0.20397893 | 11.5679354 | 5.9907E-31 | 6.1991E-30 |
| MSMB       | ENSG00000263639 | protein_coding | 3.0040711  | 2.41157773 | 0.46487793 | 5.18755047 | 2.1308E-07 | 5.1785E-07 |
| LINC00672  | ENSG00000263874 | protein_coding | 66.6278689 | 1.15495503 | 0.11032875 | 10.4683054 | 1.2079E-25 | 9.5961E-25 |
| RHEX       | ENSG00000263961 | protein_coding | 3206.94047 | 1.96756345 | 0.1615825  | 12.1768352 | 4.13E-34   | 4.9848E-33 |
| AKR1C8P    | ENSG00000264006 | protein_coding | 12.6673154 | 1.63951903 | 0.25007541 | 6.55609845 | 5.5234E-11 | 1.7928E-10 |
| AC055811.2 | ENSG00000264187 | protein_coding | 5.78529503 | 1.61265793 | 0.17833171 | 9.04302419 | 1.524E-19  | 8.6802E-19 |



|            |                 |                |            |            |            |            |            |            |
|------------|-----------------|----------------|------------|------------|------------|------------|------------|------------|
| ANXA8L1    | ENSG00000264230 | protein_coding | 10.7198304 | 1.93234288 | 0.24476476 | 7.89469395 | 2.9103E-15 | 1.2711E-14 |
| MYH4       | ENSG00000264424 | protein_coding | 6.36734888 | 1.02084316 | 0.37110141 | 2.75084689 | 0.00594414 | 0.0091715  |
| NPY4R2     | ENSG00000264717 | protein_coding | 1.32927517 | 2.38205637 | 0.40857129 | 5.83020993 | 5.5358E-09 | 1.5361E-08 |
| AC134669.1 | ENSG00000265118 | protein_coding | 5.06789606 | 1.69136156 | 0.19264894 | 8.77950079 | 1.642E-18  | 8.8037E-18 |
| ANXA8      | ENSG00000265190 | protein_coding | 8.10105807 | 1.85799588 | 0.39306298 | 4.72696732 | 2.279E-06  | 5.0418E-06 |
| AC074143.1 | ENSG00000265690 | protein_coding | 0.27982287 | 1.07007185 | 0.45654876 | 2.34382818 | 0.01908696 | 0.02744473 |
| FSBP       | ENSG00000265817 | protein_coding | 0.58545641 | 1.0255777  | 0.32709652 | 3.13539779 | 0.00171621 | 0.00282103 |
| AC004805.1 | ENSG00000266076 | protein_coding | 1.21854563 | 1.4228463  | 0.27864961 | 5.10622029 | 3.2867E-07 | 7.8606E-07 |
| RASSF5     | ENSG00000266094 | protein_coding | 1680.3297  | 1.69438582 | 0.1069639  | 15.8407266 | 1.6293E-56 | 4.8656E-55 |
| AC098850.3 | ENSG00000266302 | protein_coding | 19.9351672 | 1.64414176 | 0.31966947 | 5.14325552 | 2.7002E-07 | 6.5106E-07 |
| NBPF15     | ENSG00000266338 | protein_coding | 848.998873 | 1.23329367 | 0.08201148 | 15.0380606 | 4.1349E-51 | 1.0218E-49 |
| MYO15B     | ENSG00000266714 | protein_coding | 7406.21383 | 1.60421713 | 0.13473257 | 11.9066769 | 1.0924E-32 | 1.2295E-31 |
| AC015688.4 | ENSG00000266728 | protein_coding | 1.24962222 | 1.86772928 | 0.27454376 | 6.80302931 | 1.0244E-11 | 3.5029E-11 |
| FXYD1      | ENSG00000266964 | protein_coding | 231.195787 | 1.83046957 | 0.23192923 | 7.89236253 | 2.9652E-15 | 1.2942E-14 |
| AD000671.2 | ENSG00000267120 | protein_coding | 4.53064346 | 1.82359998 | 0.19557443 | 9.32432725 | 1.1169E-20 | 6.768E-20  |
| AC007998.2 | ENSG00000267140 | protein_coding | 2.12569659 | 1.06374841 | 0.20419128 | 5.20956835 | 1.8928E-07 | 4.6239E-07 |
| ATF7-NPFF  | ENSG00000267281 | protein_coding | 103.33389  | 2.30689695 | 0.153277   | 15.0505092 | 3.4259E-51 | 8.5073E-50 |
| AC011511.4 | ENSG00000267303 | protein_coding | 0.67943407 | 1.1320498  | 0.30228374 | 3.74499073 | 0.0001804  | 0.00033056 |
| APOC4      | ENSG00000267467 | protein_coding | 0.72141388 | 1.57602617 | 0.4771473  | 3.30301808 | 0.0009565  | 0.00161791 |
| LIN37      | ENSG00000267796 | protein_coding | 206.133177 | 1.00025088 | 0.07055622 | 14.1766496 | 1.278E-45  | 2.5253E-44 |
| CCDC177    | ENSG00000267909 | protein_coding | 4.80633345 | 2.47467727 | 0.35484716 | 6.9739243  | 3.0822E-12 | 1.095E-11  |
| ERFL       | ENSG00000268041 | protein_coding | 8.19201376 | 2.8880624  | 0.22147689 | 13.0400171 | 7.2441E-39 | 1.0764E-37 |
| GABRQ      | ENSG00000268089 | protein_coding | 157.998239 | 1.47017084 | 0.18765628 | 7.8343814  | 4.7116E-15 | 2.0313E-14 |
| AC090004.1 | ENSG00000268279 | protein_coding | 20.9357538 | 1.98350956 | 0.15515863 | 12.7837529 | 2.0208E-37 | 2.8442E-36 |
| NFILZ      | ENSG00000268480 | protein_coding | 0.55908916 | 1.78490741 | 0.5708149  | 3.12694605 | 0.00176632 | 0.00289903 |

|                |                 |                |            |            |            |            |            |            |
|----------------|-----------------|----------------|------------|------------|------------|------------|------------|------------|
| AC003002.2     | ENSG00000268533 | protein_coding | 5.49093416 | 1.46606313 | 0.19944398 | 7.35075145 | 1.971E-13  | 7.6136E-13 |
| ZNF723         | ENSG00000268696 | protein_coding | 0.99995813 | 1.01638024 | 0.47093396 | 2.15822242 | 0.03091054 | 0.04310307 |
| AC008878.3     | ENSG00000268861 | protein_coding | 2.24981743 | 1.26865817 | 0.22932045 | 5.53225061 | 3.1615E-08 | 8.2344E-08 |
| FBXO17         | ENSG00000269190 | protein_coding | 6482.42524 | 1.53036557 | 0.09469306 | 16.1613273 | 9.4505E-59 | 3.0681E-57 |
| SPIB           | ENSG00000269404 | protein_coding | 64.354162  | 1.31746829 | 0.2063539  | 6.38450877 | 1.7195E-10 | 5.3767E-10 |
| AC011455.2     | ENSG00000269547 | protein_coding | 3.74170337 | 2.83878614 | 0.27900222 | 10.1747798 | 2.5698E-24 | 1.8942E-23 |
| CT45A10        | ENSG00000269586 | protein_coding | 0.88344992 | 2.07698814 | 0.81129024 | 2.56010492 | 0.01046406 | 0.01561671 |
| CCDC194        | ENSG00000269720 | protein_coding | 7.0048058  | 3.17712874 | 0.27422951 | 11.5856559 | 4.8722E-31 | 5.0703E-30 |
| AC011473.4     | ENSG00000269741 | protein_coding | 0.69282554 | 1.57202235 | 0.72920414 | 2.15580558 | 0.03109885 | 0.04334192 |
| ARHGAP19-SLIT1 | ENSG00000269891 | protein_coding | 0.72269918 | 1.46936761 | 0.35645882 | 4.12212437 | 3.7539E-05 | 7.3948E-05 |
| AL365273.2     | ENSG00000270099 | protein_coding | 0.9323456  | 1.1649727  | 0.29319147 | 3.97341942 | 7.0848E-05 | 0.00013536 |
| TSNAX-DISC1    | ENSG00000270106 | protein_coding | 1.57965892 | 1.11616654 | 0.22708533 | 4.91518553 | 8.8698E-07 | 2.0403E-06 |
| PPIAL4H        | ENSG00000270339 | protein_coding | 1.26691029 | 2.05312637 | 0.34946917 | 5.87498567 | 4.2288E-09 | 1.1855E-08 |
| HEATR9         | ENSG00000270379 | protein_coding | 12.3849374 | 3.43883935 | 0.24959782 | 13.7775214 | 3.4802E-43 | 6.2148E-42 |
| CTAGE6         | ENSG00000271321 | protein_coding | 2.9973549  | 2.98108337 | 0.3006899  | 9.91414519 | 3.6134E-23 | 2.4968E-22 |
| CCL5           | ENSG00000271503 | protein_coding | 4069.25378 | 3.22018254 | 0.16493783 | 19.523614  | 6.9168E-85 | 5.7545E-83 |
| MILR1          | ENSG00000271605 | protein_coding | 280.094351 | 1.97657346 | 0.11641463 | 16.9787378 | 1.18E-64   | 4.6791E-63 |
| AC233992.2     | ENSG00000271698 | protein_coding | 3.93691534 | 2.44336845 | 0.29577021 | 8.26103633 | 1.4441E-16 | 6.8616E-16 |
| AL353588.1     | ENSG00000272442 | protein_coding | 12.0437791 | 1.65796914 | 0.15848381 | 10.4614418 | 1.2986E-25 | 1.0296E-24 |
| PCDHB16        | ENSG00000272674 | protein_coding | 876.391187 | 1.02440918 | 0.1535361  | 6.67210608 | 2.5216E-11 | 8.4012E-11 |
| AC073610.2     | ENSG00000272822 | protein_coding | 6.44162434 | 1.82331408 | 0.17010851 | 10.7185354 | 8.3312E-27 | 7.0411E-26 |
| ATP6V1FNB      | ENSG00000272899 | protein_coding | 335.462708 | 1.24630062 | 0.18981046 | 6.56602693 | 5.1675E-11 | 1.6811E-10 |
| AC022400.5     | ENSG00000272916 | protein_coding | 11.8251897 | 1.3445195  | 0.15575789 | 8.63211155 | 6.023E-18  | 3.1183E-17 |
| RBAK-RBAKDN    | ENSG00000272968 | protein_coding | 4.33055846 | 1.03692805 | 0.15402007 | 6.73242185 | 1.6686E-11 | 5.6244E-11 |
| LYPD4          | ENSG00000273111 | protein_coding | 2.62566023 | 3.77321689 | 0.49619839 | 7.60425061 | 2.8656E-14 | 1.1703E-13 |

|                      |                 |                |            |            |            |            |            |            |
|----------------------|-----------------|----------------|------------|------------|------------|------------|------------|------------|
| TMEM271              | ENSG00000273238 | protein_coding | 0.7861331  | 2.36576617 | 0.57381958 | 4.12283973 | 3.7423E-05 | 7.3722E-05 |
| TM4SF19-<br>TCTEX1D2 | ENSG00000273331 | protein_coding | 1.50580551 | 2.37185862 | 0.32471225 | 7.30449377 | 2.7831E-13 | 1.0626E-12 |
| TBC1D3K              | ENSG00000273513 | protein_coding | 0.50999679 | 1.4246586  | 0.5460269  | 2.60913631 | 0.00907711 | 0.01366559 |
| AGBL1                | ENSG00000273540 | protein_coding | 2.15893918 | 2.86642971 | 0.58807686 | 4.87424328 | 1.0923E-06 | 2.4903E-06 |
| H4C12                | ENSG00000273542 | protein_coding | 5.02921558 | 1.37020948 | 0.22852923 | 5.99577342 | 2.0252E-09 | 5.834E-09  |
| EPOP                 | ENSG00000273604 | protein_coding | 197.38994  | 1.14194377 | 0.12124712 | 9.4183169  | 4.5838E-21 | 2.8345E-20 |
| H2BC14               | ENSG00000273703 | protein_coding | 1.80345181 | 3.34353521 | 0.45544808 | 7.34119946 | 2.1169E-13 | 8.1553E-13 |
| CEACAM20             | ENSG00000273777 | protein_coding | 4.48930966 | 3.07847559 | 0.36046704 | 8.54024147 | 1.3394E-17 | 6.7861E-17 |
| NOL12                | ENSG00000273899 | protein_coding | 239.635797 | 1.06775515 | 0.09523544 | 11.2117422 | 3.5709E-29 | 3.4153E-28 |
| H3C8                 | ENSG00000273983 | protein_coding | 24.0650004 | 1.94233116 | 0.24011225 | 8.08926321 | 6.0027E-16 | 2.7388E-15 |
| GGTLC3               | ENSG00000274252 | protein_coding | 2.62376991 | 1.00140698 | 0.40557303 | 2.46911629 | 0.01354472 | 0.01988992 |
| H2BC6                | ENSG00000274290 | protein_coding | 15.6518122 | 1.5363599  | 0.20904532 | 7.3494105  | 1.9908E-13 | 7.6865E-13 |
| AL136531.2           | ENSG00000274322 | protein_coding | 19.2540806 | 1.24497276 | 0.14878274 | 8.36772314 | 5.8742E-17 | 2.8586E-16 |
| TMEM269              | ENSG00000274386 | protein_coding | 5.4111475  | 1.69984858 | 0.19659045 | 8.64664899 | 5.3034E-18 | 2.7567E-17 |
| TBC1D3D              | ENSG00000274419 | protein_coding | 4.0433186  | 2.97659424 | 0.60652484 | 4.90762132 | 9.2188E-07 | 2.1165E-06 |
| TBC1D3L              | ENSG00000274512 | protein_coding | 37.0433051 | 2.23023415 | 0.21793888 | 10.2333012 | 1.4064E-24 | 1.0521E-23 |
| RIMBP3B              | ENSG00000274600 | protein_coding | 1.35273294 | 1.82214654 | 0.27340583 | 6.66462212 | 2.6535E-11 | 8.8258E-11 |
| TBC1D3               | ENSG00000274611 | protein_coding | 0.6713231  | 1.67749242 | 0.7179724  | 2.33643022 | 0.01946883 | 0.02797188 |
| H4C6                 | ENSG00000274618 | protein_coding | 1.46655321 | 2.63014986 | 0.60307728 | 4.36121534 | 1.2934E-05 | 2.6623E-05 |
| H2BC17               | ENSG00000274641 | protein_coding | 4.77962604 | 2.14616353 | 0.25534769 | 8.40486772 | 4.2834E-17 | 2.1041E-16 |
| H3C6                 | ENSG00000274750 | protein_coding | 45.9502408 | 1.16002074 | 0.15500743 | 7.4836458  | 7.2289E-14 | 2.8805E-13 |
| TBC1D3B              | ENSG00000274808 | protein_coding | 5.60533674 | 2.28621693 | 0.229245   | 9.97281043 | 2.0047E-23 | 1.4045E-22 |
| NPHP3-ACAD11         | ENSG00000274810 | protein_coding | 4.37288908 | 1.65589315 | 0.19483718 | 8.49885614 | 1.9147E-17 | 9.6135E-17 |
| AL139260.3           | ENSG00000274944 | protein_coding | 7.39288935 | 1.17430068 | 0.15622399 | 7.51677543 | 5.6144E-14 | 2.2529E-13 |

|          |                 |                |            |            |            |            |            |            |
|----------|-----------------|----------------|------------|------------|------------|------------|------------|------------|
| H2AC12   | ENSG00000274997 | protein_coding | 1.10052062 | 2.11336158 | 0.37299452 | 5.66593203 | 1.4623E-08 | 3.9209E-08 |
| CCL4     | ENSG00000275302 | protein_coding | 909.4265   | 2.64194808 | 0.14875116 | 17.7608573 | 1.4205E-70 | 7.0018E-69 |
| H3C11    | ENSG00000275379 | protein_coding | 0.90320978 | 2.30309125 | 0.59424852 | 3.87563649 | 0.00010635 | 0.00019969 |
| CCL18    | ENSG00000275385 | protein_coding | 893.218879 | 5.67630469 | 0.28431594 | 19.9647785 | 1.1152E-88 | 1.0628E-86 |
| C17orf98 | ENSG00000275489 | protein_coding | 3.08384161 | 1.51822183 | 0.3204029  | 4.73847721 | 2.1533E-06 | 4.775E-06  |
| GRIFIN   | ENSG00000275572 | protein_coding | 1.85318036 | 1.93408753 | 0.27955173 | 6.91853183 | 4.5635E-12 | 1.6006E-11 |
| H2BC9    | ENSG00000275713 | protein_coding | 12.35021   | 2.13726845 | 0.23042449 | 9.27535283 | 1.7703E-20 | 1.0611E-19 |
| RIMBP3   | ENSG00000275793 | protein_coding | 15.7830849 | 1.34178995 | 0.13309281 | 10.0816108 | 6.6625E-24 | 4.7931E-23 |
| U2AF1L5  | ENSG00000275895 | protein_coding | 16.7812511 | 1.3470658  | 0.24284522 | 5.54701393 | 2.9059E-08 | 7.589E-08  |
| PRSS2    | ENSG00000275896 | protein_coding | 22.8754199 | 3.04027591 | 0.31554652 | 9.6349532  | 5.6918E-22 | 3.7004E-21 |
| UHRF1    | ENSG00000276043 | protein_coding | 263.358623 | 2.75530581 | 0.13927392 | 19.7833577 | 4.1417E-87 | 3.7301E-85 |
| CCL4L2   | ENSG00000276070 | protein_coding | 440.616554 | 2.54908611 | 0.18948394 | 13.4527818 | 2.965E-41  | 4.8769E-40 |
| CCL3L3   | ENSG00000276085 | protein_coding | 199.256124 | 1.69408012 | 0.20123488 | 8.41842179 | 3.8159E-17 | 1.8805E-16 |
| H4C9     | ENSG00000276180 | protein_coding | 302.464533 | 1.1419842  | 0.13717364 | 8.32509942 | 8.4258E-17 | 4.0636E-16 |
| PIK3R6   | ENSG00000276231 | protein_coding | 264.038434 | 3.37154751 | 0.15392382 | 21.9040004 | 2.379E-106 | 4.516E-104 |
| H2AC14   | ENSG00000276368 | protein_coding | 1.61243906 | 2.67071414 | 0.43760139 | 6.10307514 | 1.0405E-09 | 3.0696E-09 |
| H2BC3    | ENSG00000276410 | protein_coding | 0.94401535 | 1.47414026 | 0.43217624 | 3.41097013 | 0.00064732 | 0.00111552 |
| RAB7B    | ENSG00000276600 | protein_coding | 342.045356 | 2.04942916 | 0.1143111  | 17.9285227 | 7.0632E-72 | 3.6339E-70 |
| PADI6    | ENSG00000276747 | protein_coding | 2.26330572 | 2.82655978 | 0.35850901 | 7.88420845 | 3.1654E-15 | 1.3787E-14 |
| H2AC16   | ENSG00000276903 | protein_coding | 1.09493174 | 2.11870815 | 0.45127771 | 4.69490983 | 2.6672E-06 | 5.8654E-06 |
| GSTT4    | ENSG00000276950 | protein_coding | 1.5911375  | 1.17339922 | 0.31308168 | 3.74790121 | 0.00017832 | 0.00032688 |
| H4C5     | ENSG00000276966 | protein_coding | 17.6140832 | 2.00795728 | 0.23558651 | 8.52322685 | 1.5517E-17 | 7.8295E-17 |
| H2AC8    | ENSG00000277075 | protein_coding | 88.8338673 | 1.64832115 | 0.20937664 | 7.87251692 | 3.4758E-15 | 1.5107E-14 |
| H4C4     | ENSG00000277157 | protein_coding | 5.94596827 | 1.31476375 | 0.29775635 | 4.41556921 | 1.0074E-05 | 2.0968E-05 |
| H2BC7    | ENSG00000277224 | protein_coding | 12.0966074 | 2.78248028 | 0.30788887 | 9.03728761 | 1.6061E-19 | 9.1311E-19 |

|              |                 |                |            |            |            |            |            |            |
|--------------|-----------------|----------------|------------|------------|------------|------------|------------|------------|
| MARCKS       | ENSG00000277443 | protein_coding | 11168.1343 | 1.09165064 | 0.07996222 | 13.65208   | 1.962E-42  | 3.3901E-41 |
| PKD1L3       | ENSG00000277481 | protein_coding | 13.7414417 | 1.42695728 | 0.17455097 | 8.17501795 | 2.9582E-16 | 1.3758E-15 |
| CCL3         | ENSG00000277632 | protein_coding | 444.755428 | 1.82248674 | 0.16594786 | 10.9822852 | 4.6501E-28 | 4.1863E-27 |
| H3C7         | ENSG00000277775 | protein_coding | 1.50648531 | 2.51609509 | 0.41392215 | 6.07866744 | 1.2119E-09 | 3.5522E-09 |
| SENP3-EIF4A1 | ENSG00000277957 | protein_coding | 4.54133269 | 1.73280328 | 0.20028417 | 8.65172376 | 5.0727E-18 | 2.638E-17  |
| RDM1         | ENSG00000278023 | protein_coding | 20.5856426 | 2.01097141 | 0.16641768 | 12.0838807 | 1.2851E-33 | 1.5163E-32 |
| H2AC4        | ENSG00000278463 | protein_coding | 1.2367316  | 1.92672196 | 0.41266357 | 4.66898973 | 3.0268E-06 | 6.6221E-06 |
| H2BC10       | ENSG00000278588 | protein_coding | 2.22991652 | 2.26229727 | 0.44510738 | 5.08258764 | 3.7233E-07 | 8.8646E-07 |
| TBC1D3E      | ENSG00000278599 | protein_coding | 2.99174374 | 2.28751437 | 0.4256993  | 5.37354511 | 7.7203E-08 | 1.9509E-07 |
| H4C1         | ENSG00000278637 | protein_coding | 1.18070835 | 1.78981903 | 0.43480333 | 4.11638758 | 3.8486E-05 | 7.5721E-05 |
| GOLGA6L10    | ENSG00000278662 | protein_coding | 25.6508145 | 1.4631807  | 0.16447664 | 8.89597865 | 5.7907E-19 | 3.1882E-18 |
| H2AC17       | ENSG00000278677 | protein_coding | 11.7170483 | 2.72018154 | 0.23236836 | 11.7063335 | 1.1828E-31 | 1.2708E-30 |
| IQCA1L       | ENSG00000278685 | protein_coding | 1.23716867 | 2.57934009 | 0.37057301 | 6.96040994 | 3.3928E-12 | 1.2012E-11 |
| H4C2         | ENSG00000278705 | protein_coding | 4.33639993 | 1.09347804 | 0.3128302  | 3.49543626 | 0.00047329 | 0.00082815 |
| H3C10        | ENSG00000278828 | protein_coding | 177.912042 | 2.57594047 | 0.19601148 | 13.1417836 | 1.897E-39  | 2.8987E-38 |
| OR2T11       | ENSG00000279301 | protein_coding | 0.66519684 | 1.27733841 | 0.44776736 | 2.85268313 | 0.00433518 | 0.00680439 |
| AC244517.10  | ENSG00000279983 | protein_coding | 0.84639348 | 1.96785128 | 0.34045945 | 5.77998723 | 7.4706E-09 | 2.0482E-08 |
| OR12D2       | ENSG00000280236 | protein_coding | 0.82630086 | 2.2632145  | 0.80409766 | 2.81460152 | 0.00488377 | 0.0076115  |
| AC068946.1   | ENSG00000280537 | protein_coding | 42.9510451 | 1.44677578 | 0.17589417 | 8.225263   | 1.9476E-16 | 9.1589E-16 |
| AC005154.5   | ENSG00000281039 | protein_coding | 2.35514342 | 1.99347405 | 0.29094458 | 6.85173119 | 7.2962E-12 | 2.526E-11  |
| TMEM272      | ENSG00000281106 | protein_coding | 10.4587836 | 1.13360678 | 0.16437086 | 6.89664079 | 5.3247E-12 | 1.8591E-11 |
| AC120114.4   | ENSG00000281348 | protein_coding | 4.5790513  | 1.31214197 | 0.1501584  | 8.73838525 | 2.3647E-18 | 1.2543E-17 |
| AC006978.2   | ENSG00000281593 | protein_coding | 4.03743678 | 1.19302307 | 0.20202124 | 5.90543396 | 3.5172E-09 | 9.9232E-09 |
