# Supplementary material for: Identification and Validation of a Novel Ferroptotic Prognostic Genes-Based Signature of Clear Cell Renal Cell Carcinoma
Source: MDPI journal article supplement (doi:10.3390/cancers14194690), 2022-09-27
Supplement: s1 [file s1]

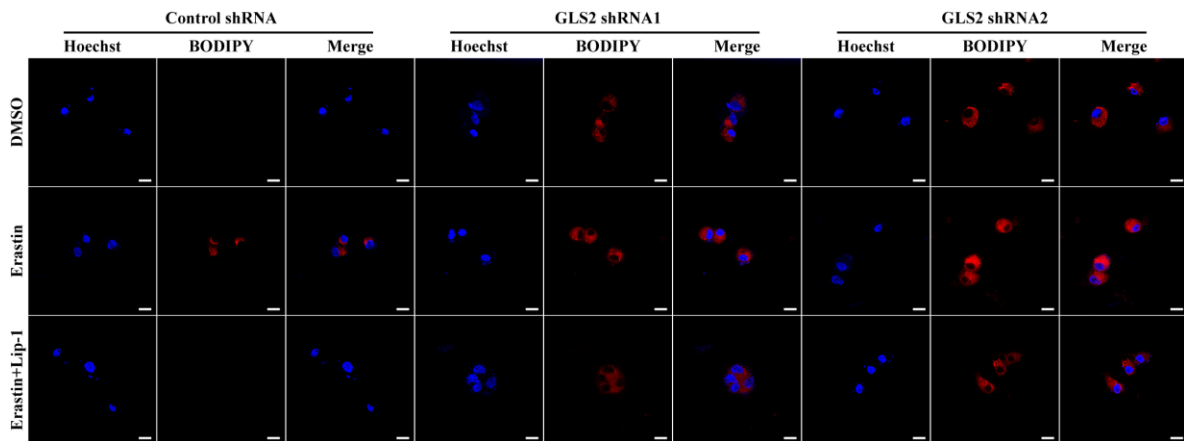

**Figure S1.** Lipid peroxidation of Caki-1 with various treatments (Nuclei were stained with Hoechst 33342, and lipid peroxides were stained with BODIPY 665\_676). The scale bar represented 20  $\mu\text{m}$ .

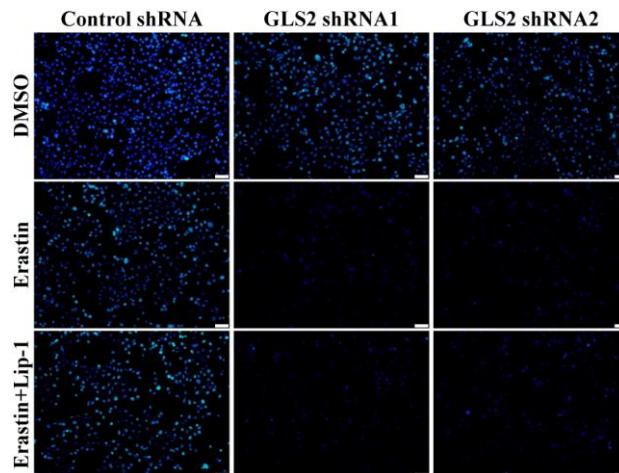

**Figure S2.** The status of intracellular GSH levels was assessed by MBB staining in ACHN treated with erastin (10  $\mu\text{M}$ , 12 h) in the absence or presence of Lip-1 (1  $\mu\text{M}$ ). The scale bar represented 100  $\mu\text{m}$ .

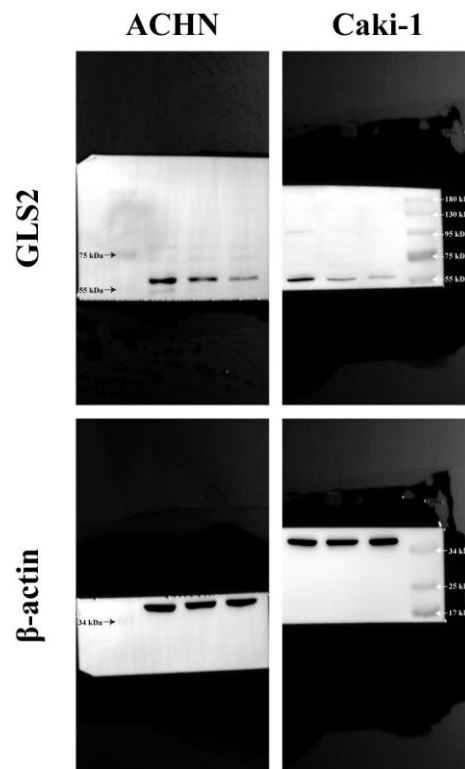

Figure S3. Original whole blot.
