# Supplementary material for: Identification and Validation of a Novel Ferroptotic Prognostic Genes-Based Signature of Clear Cell Renal Cell Carcinoma
Source: MDPI journal article supplement (doi:10.3390/cancers14194690), 2022-09-27
Supplement: s1 [file s1]

**Table S6** List of 207 TPGs.

| Gene name |
|-----------|
| IREB2     |
| ATP5MC3   |
| CS        |
| EMC2      |
| CYBB      |
| NOX4      |
| VDAC2     |
| PIK3CA    |
| FLT3      |
| SCP2      |
| LPCAT3    |
| NRAS      |
| KRAS      |
| TF        |
| TFR2      |
| SLC38A1   |
| SLC1A5    |
| GLS2      |
| GOT1      |
| HMOX1     |
| ATG5      |
| ATG7      |
| NCOA4     |
| ALOX12B   |
| ALOXE3    |
| PHKG2     |
| ACO1      |
| ATG3      |
| ATG4D     |
| BECN1     |
| GABARAPL2 |
| GABARAPL1 |
| SNX4      |
| MAPK3     |
| MAPK1     |
| ZEB1      |
| DPP4      |
| CDKN2A    |
| PEBP1     |
| SOCS1     |
| MAPK8     |

|         |
|---------|
| MAPK9   |
| CHAC1   |
| MAPK14  |
| PRKAA2  |
| PRKAA1  |
| ELAVL1  |
| BAP1    |
| ACVR1B  |
| TGFBR1  |
| EPAS1   |
| ANO6    |
| HMGB1   |
| TNFAIP3 |
| TLR4    |
| MIOX    |
| TAZ     |
| MTDH    |
| SIRT1   |
| CD82    |
| CYB5R1  |
| PTEN    |
| IL6     |
| USP7    |
| AQP8    |
| PEX10   |
| AGPAT3  |
| PEX12   |
| CHP1    |
| GPAT4   |
| BRPF1   |
| OSBPL9  |
| INTS2   |
| AEBP2   |
| AGPS    |
| CDCA3   |
| PEX2    |
| TIMM9   |
| DCAF7   |
| AMN     |
| PEX3    |
| MTCH1   |
| ACADSB  |
| MAP3K11 |

|         |
|---------|
| GSK3B   |
| BRD7    |
| MFN2    |
| TSC1    |
| SIRT3   |
| DLD     |
| WWTR1   |
| LGMN    |
| MYCN    |
| SMG9    |
| PPARG   |
| SNX5    |
| MICU1   |
| QSOX1   |
| CLTRN   |
| KLF2    |
| FOXO4   |
| YTHDC2  |
| SLC39A7 |
| TRIM46  |
| ACSL1   |
| KDM5A   |
| TRIM21  |
| DPEP1   |
| GSTZ1   |
| GJA1    |
| PGRMC1  |
| CIRBP   |
| TRIM26  |
| NDRG1   |
| LIFR    |
| EGR1    |
| CPEB1   |
| TIMP1   |
| KDM6B   |
| METTL14 |
| MIB1    |
| CCDC6   |
| SLC40A1 |
| NFE2L2  |
| AKR1C1  |
| AKR1C2  |
| AKR1C3  |

|          |
|----------|
| RB1      |
| GCLC     |
| NQO1     |
| MT1G     |
| SRC      |
| MTOR     |
| NFS1     |
| CDKN1A   |
| ENPP2    |
| FH       |
| CISD2    |
| CBS      |
| ACSL3    |
| NF2      |
| JUN      |
| CA9      |
| PLIN2    |
| LAMP2    |
| PROM2    |
| CHMP5    |
| CHMP6    |
| RRM2     |
| NR4A1    |
| SREBF2   |
| BCAT2    |
| PLA2G6   |
| ATF2     |
| ACOT1    |
| ALDH3A2  |
| CDH1     |
| NEDD4L   |
| BRD2     |
| BRD3     |
| DECR1    |
| GLRX5    |
| NCOA3    |
| PANX2    |
| TFAP2A   |
| ARF6     |
| PPP1R13L |
| TFAM     |
| KDM3B    |
| AHCY     |

|          |
|----------|
| PPARA    |
| NOS2     |
| RELA     |
| NEDD4    |
| AR       |
| MTF1     |
| USP35    |
| PARP4    |
| PARP6    |
| PARP11   |
| PARP15   |
| PDSS2    |
| CREB1    |
| CREB3    |
| BEX1     |
| ASAH2    |
| SIRT6    |
| KIF20A   |
| VCP      |
| KDM4A    |
| MPC1     |
| SOX2     |
| SIRT2    |
| MEF2C    |
| EZH2     |
| ADAMTS13 |
| ENO3     |
| LCN2     |
| MARCHF5  |
| TRIB2    |
| DHODH    |
| PDK4     |
| CISD3    |
| MS4A15   |
| FURIN    |
| GALNT14  |
| KLHDC3   |
