# Supplementary material for: Identification and Validation of a Novel Ferroptotic Prognostic Genes-Based Signature of Clear Cell Renal Cell Carcinoma
Source: MDPI journal article supplement (doi:10.3390/cancers14194690), 2022-09-27
Supplement: s1 [file s1]

**Table S2** List of DEGs from three GEO databases.

| Gene name |
|-----------|
| KNG1      |
| UMOD      |
| CALB1     |
| FABP1     |
| SLC12A1   |
| HPD       |
| NPHS2     |
| SLC22A8   |
| DIO1      |
| KCNJ1     |
| CLDN8     |
| SLC7A13   |
| RALYL     |
| ALB       |
| NDUFA4L2  |
| NPTX2     |
| MUC15     |
| SLC13A3   |
| CLCNKB    |
| SERPINA5  |
| CTXN3     |
| FXYP4     |
| XPNPEP2   |
| TMEM213   |
| G6PC      |
| ATP6V0A4  |
| TFAP2B    |
| PLG       |
| DPEP1     |
| HRG       |
| ENPP6     |
| TNFAIP6   |
| DMRT2     |
| HEPACAM2  |
| CRYAA     |
| AFM       |
| FAM151A   |
| PVALB     |
| ANGPTL4   |
| SLC22A7   |
| SH3GL2    |

|           |
|-----------|
| UPP2      |
| SOST      |
| TYRP1     |
| ALDOB     |
| RHCG      |
| CA10      |
| PCP4      |
| FLJ22763  |
| EHF       |
| SLC26A7   |
| GPC5      |
| ERBB4     |
| FGF9      |
| SFRP1     |
| IGSF11    |
| LPPR1     |
| LOC149703 |
| DNMT3L    |
| ATP6V1G3  |
| TFCP2L1   |
| FABP6     |
| SLC22A6   |
| IYD       |
| IRX2      |
| SLC47A2   |
| RAB25     |
| CA9       |
| HK2       |
| SOSTDC1   |
| CYP4F3    |
| HILPDA    |
| FABP7     |
| TUBAL3    |
| SCN2A     |
| EGF       |
| NPHS1     |
| TREM2     |
| C5orf46   |
| ENO2      |
| FAM3B     |
| MTTP      |
| ACPP      |
| SLC5A11   |

|          |
|----------|
| NKG7     |
| RHBG     |
| SLC4A1   |
| PSAT1    |
| CDCA2    |
| TSPAN8   |
| FGF1     |
| ATP6V0D2 |
| DDN      |
| TREH     |
| TCEAL2   |
| OLFM4    |
| ADH1C    |
| ANGPTL3  |
| SLC12A3  |
| C3       |
| PIGR     |
| AZGP1    |
| CNTN3    |
| AHNAK2   |
| MIOX     |
| COL23A1  |
| SLC6A3   |
| CWH43    |
| CLIC5    |
| SLC34A1  |
| PPFIA4   |
| HAO2     |
| CRHBP    |
| CHL1     |
| PROM2    |
| APOH     |
| CTHRC1   |
| CCL20    |
| PTH1R    |
| SLC22A13 |
| SLC28A2  |
| NXPH2    |
| RGS1     |
| LOX      |
| QRFPR    |
| TMPRSS4  |
| MAL      |

|          |
|----------|
| CYP27B1  |
| PCK1     |
| ABAT     |
| CLSTN2   |
| VTCN1    |
| REEP6    |
| APOC1    |
| LDHD     |
| PROZ     |
| PPP1R1A  |
| ACSF2    |
| ATP6V1C2 |
| INHBB    |
| PIPOX    |
| HSD11B2  |
| DAO      |
| APOC3    |
| PROC     |
| ADH6     |
| TMEM45A  |
| SLC5A2   |
| DOC2A    |
| S100A2   |
| PRODH2   |
| PPAPDC1A |
| SLC13A1  |
| TNNC1    |
| BHLHE41  |
| ASPM     |
| NR1I3    |
| PLCXD3   |
| WT1      |
| C7       |
| DIRAS2   |
| ALDH6A1  |
| AGPAT9   |
| COL4A6   |
| MT1G     |
| C1orf168 |
| C16orf89 |
| ESRRG    |
| PAPPA    |
| CXCL13   |

|           |
|-----------|
| LOC645321 |
| DUSP9     |
| CCL18     |
| ST8SIA4   |
| PIK3C2G   |
| EGLN3     |
| NETO2     |
| SPAG4     |
| CYP4A11   |
| RDH12     |
| SLAMF7    |
| FMN2      |
| DNER      |
| FKBP10    |
| FAM26F    |
| STAP1     |
| DCXR      |
| RANBP3L   |
| OTOGL     |
| TRPA1     |
| ACOT12    |
| GABRA2    |
| IRX1      |
| SLC5A12   |
| SIM1      |
| ANGPT2    |
| MFSD4     |
| IGFBP3    |
| RBP4      |
| DNAH11    |
| TAC1      |
| CDH3      |
| WNK4      |
| NNMT      |
| PNCK      |
| HIGD1B    |
| DEFB1     |
| HPGD      |
| C14orf37  |
| FCAMR     |
| CD70      |
| DDC       |
| TMEM61    |

|          |
|----------|
| TNFRSF4  |
| SEMA5B   |
| SORCS1   |
| NR0B2    |
| LPCAT1   |
| ASS1     |
| SLC16A9  |
| LGSN     |
| TUBB2B   |
| CCBE1    |
| GPD1     |
| ADAMDEC1 |
| CYP2J2   |
| IDO1     |
| LOXL2    |
| VCAN     |
| GPC3     |
| SUCNR1   |
| MYH8     |
| SLC7A8   |
| MRO      |
| OGDHL    |
| LAMA4    |
| FOXI1    |
| CXCR4    |
| CD300LF  |
| ZYG11A   |
| PLA2G7   |
| WIF1     |
| FBP1     |
| SLC26A4  |
| TGFBI    |
| TRIM63   |
| SCARB1   |
| GLDC     |
| FREM1    |
| C4orf6   |
| CDH13    |
| PLA2R1   |
| CAV1     |
| GRHL2    |
| CDH9     |
| IL17RB   |

|           |
|-----------|
| ANO5      |
| MT1H      |
| BSND      |
| STC2      |
| SUSD2     |
| RNASET2   |
| PFKFB4    |
| CHGB      |
| MIR210HG  |
| TMCC1     |
| SUSD4     |
| FAM169A   |
| F11       |
| KCNJ13    |
| FOLR3     |
| LYPD6B    |
| SORD      |
| EFHD1     |
| LRRC19    |
| SLC30A2   |
| IL4I1     |
| LOC389332 |
| LINC00473 |
| CYP8B1    |
| TCF21     |
| PHF21B    |
| CRTAM     |
| E2F8      |
| CP        |
| PHYHD1    |
| AQP6      |
| VAV1      |
| PDK1      |
| BIN2      |
| CLDN16    |
| RASL11B   |
| BIRC3     |
| CPNE6     |
| ERP27     |
| CXCL9     |
| FMO5      |
| INPP5J    |
| DNAJC12   |

|            |
|------------|
| BIK        |
| APOM       |
| ERVMER34-1 |
| ANXA9      |
| MAN1C1     |
| ANK2       |
| MCOLN3     |
| DLGAP5     |
| PFKP       |
| HMGCS2     |
| ALDH4A1    |
| PCK2       |
| GZMH       |
| IGSF6      |
| CEP55      |
| CAV2       |
| ESRP1      |
| PCDH9      |
| SLC17A4    |
| DACH1      |
| EDDM3A     |
| SCGN       |
| MT1F       |
| SHISA3     |
| ENPP3      |
| CES4A      |
| TMEM72     |
| BRCA2      |
| SLC44A4    |
| CNDP1      |
| EHD2       |
| TRIB3      |
| HAO1       |
| SLC27A2    |
| STK33      |
| TRIM9      |
| NAT2       |
| DCN        |
| CORO1A     |
| CXCL11     |
| PEPD       |
| MRAP2      |
| PRR15L     |



|          |
|----------|
| HOGA1    |
| CXCL10   |
| ABCA12   |
| LRRC2    |
| BCHE     |
| ALOX5    |
| SLC23A1  |
| NOX4     |
| SLC7A9   |
| AOX1     |
| CTSS     |
| PLCL1    |
| SOX11    |
| PHYHIP   |
| MME      |
| SCD      |
| SLC2A12  |
| CLDN19   |
| C1orf116 |
| SLC17A1  |
| DHDH     |
| GNLY     |
| PLK2     |
| P2RX7    |
| GATA3    |
| GZMK     |
| WDR72    |
| TEX11    |
| AGXT2    |
| CYP24A1  |
| DDB2     |
| LHX1     |
| C1QC     |
| C1QA     |
| FPR3     |
| LRP1B    |
| PC       |
| S1PR5    |
| KIF20A   |
| DTL      |
| PRAP1    |
| ADM      |
| C1QB     |

|          |
|----------|
| LRRC25   |
| IRX3     |
| SLC16A10 |
| ACOX2    |
| ZNF395   |
| DPEP2    |
| FABP5    |
| AP1M2    |
| C9orf135 |
| LILRB2   |
| CA4      |
| SAP30    |
| CSPG4    |
| RPS6KA6  |
| PRRG2    |
| HTRA4    |
| ETNK2    |
| FN1      |
| SVOPL    |
| APOLD1   |
| SLFN13   |
| CCR5     |
| STAMBPL1 |
| TLR7     |
| SIRPG    |
| KLK1     |
| SLIT2    |
| SEMA6D   |
| PRIMA1   |
| SPINK13  |
| ARG2     |
| RHOH     |
| UGT3A1   |
| ESM1     |
| CCL5     |
| CHP2     |
| RGS7     |
| RAB42    |
| PLCD4    |
| PNMA2    |
| DPYS     |
| GSTM3    |
| ANGPTL1  |

|          |
|----------|
| KCNK3    |
| TSPAN1   |
| GJC1     |
| RASSF10  |
| SIGLEC10 |
| C6orf123 |
| APOL1    |
| DDIT4    |
| FRMD7    |
| ASPDH    |
| PP7080   |
| COL8A1   |
| ANO4     |
| BMPR1B   |
| PTHLH    |
| ITGB2    |
| SLAMF8   |
| TLR3     |
| FAP      |
| CXCL5    |
| CD1D     |
| LYZ      |
| C9orf84  |
| TMPRSS2  |
| KL       |
| HADH     |
| CPNE4    |
| SPTBN2   |
| LAD1     |
| CORO2B   |
| NECAB2   |
| CD33     |
| MPPED2   |
| C2orf40  |
| CLDN10   |
| MSR1     |
| AIF1L    |
| CPA6     |
| QPRT     |
| STRA6    |
| SFXN2    |
| IKZF1    |
| MT1E     |

|              |
|--------------|
| CENPM        |
| KCNJ2        |
| GGH          |
| MPP7         |
| MCAM         |
| CKMT2        |
| EBF2         |
| LCP2         |
| RASSF2       |
| EPCAM        |
| CENPK        |
| LOC100506125 |
| ARSF         |
| ISG20        |
| HLA-DQB1     |
| UPK1B        |
| PDE1A        |
| CLUL1        |
| SUCLG1       |
| DDX25        |
| TNFSF13B     |
| MS4A7        |
| UBASH3A      |
| CD86         |
| NRG3         |
| ADAMTS16     |
| AGR3         |
| TYROBP       |
| ADAMTS19     |
| GZMA         |
| BTK          |
| RPRM         |
| CHST15       |
| RRM2         |
| EPHA3        |
| IL3RA        |
| PNPLA1       |
| ANLN         |
| TMC4         |
| NUF2         |
| RAC2         |
| CD36         |
| C8orf22      |

|              |
|--------------|
| SH2D1A       |
| SLC7A11      |
| COL21A1      |
| OLFML2A      |
| SLC4A9       |
| CDH16        |
| CRISP2       |
| SLC1A3       |
| KLK7         |
| GAS2L3       |
| TLR8         |
| HSPA6        |
| NOL3         |
| FUT3         |
| ALLC         |
| DEF6         |
| CTSW         |
| DLX5         |
| LOC100505938 |
| FCGR1B       |
| MYBL1        |
| CRYM         |
| MOGAT1       |
| EMX1         |
| XCL1         |
| PMCH         |
| GAL3ST1      |
| LRRN1        |
| C10orf10     |
| NDNF         |
| NAPSA        |
| PAG1         |
| LAPTM5       |
| VAT1L        |
| EOMES        |
| OLFML2B      |
| CLEC14A      |
| TRAT1        |
| RBM11        |
| SCGB2A1      |
| CENPE        |
| LIX1         |
| CTH          |

|         |
|---------|
| SLC39A5 |
| CAPN3   |
| CD2     |
| OXGR1   |
| TIMP1   |
| COL1A1  |
| FOLR1   |
| TPX2    |
| PTPRC   |
| UHRF1   |
| SLC7A7  |
| PSMB9   |
| BHMT    |
| PYCARD  |
| PROX1   |
| LILRB1  |
| COLEC11 |
| ALDH8A1 |
| KCNJ15  |
| ITK     |
| ALAD    |
| LGI4    |
| ITGA4   |
| CST7    |
| SLFN11  |
| CD247   |
| HSPA2   |
| GLTPD2  |
| ACSBG2  |
| BEX1    |
| TLR2    |
| ACAA1   |
| PRDM1   |
| GZMB    |
| MELK    |
| RGS5    |
| C4orf47 |
| SIGLEC8 |
| KLRC3   |
| NEK2    |
| GABRP   |
| IGFBP2  |
| GJA1    |

|         |
|---------|
| GRB14   |
| IGF2BP3 |
| FOXM1   |
| ALDOC   |
| CCL4    |
| FBLN5   |
| PLOD2   |
| LGALS1  |
| PHKA2   |
| NAP1L2  |
| OSBPL6  |
| NCKAP1L |
| HYAL1   |
| KLRG2   |
| ADORA3  |
| C9orf66 |
| CCND1   |
| NKAIN4  |
| AKR7A3  |
| MCHR1   |
| GABRD   |
| PTGS1   |
| BPHL    |
| LAT2    |
| CD163   |
| EPHX2   |
| SGK2    |
| CSTA    |
| LPAR5   |
| ICOS    |
| IGSF5   |
| NPNT    |
| APBB1IP |
| PTGDS   |
| ITGA5   |
| SCG5    |
| CDCA7   |
| CLEC2B  |
| REEP2   |
| PALM3   |
| EVI2A   |
| PRKCDBP |
| TRPV2   |

|           |
|-----------|
| UCHL1     |
| PLXDC1    |
| KRT7      |
| KCNMA1    |
| PRF1      |
| BTNL9     |
| MAGI2-AS3 |
| TAP1      |
| FXYD5     |
| PPP1R3C   |
| EMR2      |
| COL6A2    |
| FLJ32255  |
| MFSD3     |
| LAMP3     |
| TTK       |
| RGN       |
| BTN3A2    |
| P4HA3     |
| USP44     |
| PAK6      |
| CLCN5     |
| CDCA7L    |
| TIGIT     |
| KIAA0101  |
| GPR65     |
| TST       |
| C12orf56  |
| TAGAP     |
| PAQR5     |
| C1orf210  |
| IL20RB    |
| KCNE4     |
| SLC16A7   |
| GSTO2     |
| VDR       |
| FAM57A    |
| SLC15A2   |
| GMPR      |
| SERPINA4  |
| ENTPD1    |
| TMEM45B   |
| SELENBP1  |



|           |
|-----------|
| CD3D      |
| IL10RA    |
| CCL11     |
| ERV3-2    |
| HLX       |
| AXL       |
| IFI44L    |
| ARHGAP9   |
| ABCG1     |
| MACROD1   |
| P2RY12    |
| PPP1R3B   |
| CLEC4A    |
| PBK       |
| FCGR2B    |
| ABCB1     |
| SMTNL2    |
| CCNE2     |
| LOC154761 |
| GPD1L     |
| SLC15A4   |
| HLA-DQA1  |
| TYRO3     |
| CAPSL     |
| SLC25A10  |
| DOCK10    |
| IL2RB     |
| TAGLN3    |
| SERPINE1  |
| DCLK1     |
| TYMP      |
| CHSY3     |
| CD180     |
| ACSM2B    |
| EGFR      |
| HCLS1     |
| TMEM155   |
| GDA       |
| EYA2      |
| ACSM2A    |
| SAT2      |
| RNF152    |
| KLK6      |

|          |
|----------|
| CSF2RA   |
| PLIN2    |
| RERGL    |
| HAPLN1   |
| NOD2     |
| APOBR    |
| NAT8B    |
| CD8A     |
| ACSM3    |
| SIRPB2   |
| TNFRSF9  |
| HFM1     |
| GBP5     |
| MT1X     |
| FLRT3    |
| TINAG    |
| ANK3     |
| MARVELD2 |
| MAL2     |
| VNN2     |
| AQP1     |
| PSMB8    |
| LAIR1    |
| CDC45    |
| MNDA     |
| P2RY8    |
| ACAT1    |
| SLC43A3  |
| GGTA1P   |
| ABCA4    |
| GPT2     |
| SLC38A1  |
| UGT2B28  |
| TNFSF9   |
| BDH2     |
| MND1     |
| GCGR     |
| PABPC4L  |
| TACC3    |
| HLA-DPB1 |
| SCG2     |
| CPE      |
| LHFPL2   |

|           |
|-----------|
| AMDHD1    |
| VWCE      |
| SCN4B     |
| PLVAP     |
| TNIP3     |
| PECAM1    |
| MUC13     |
| CHODL     |
| RAD51AP1  |
| APOBEC3C  |
| AQP9      |
| IKBIP     |
| BARX2     |
| FERMT3    |
| HSF4      |
| HAVCR1    |
| ODAM      |
| CARD16    |
| ADA       |
| TMC8      |
| HOXB8     |
| BCL11A    |
| MS4A4A    |
| MARVELD3  |
| EBI3      |
| APOBEC3G  |
| CX3CR1    |
| MCF2L-AS1 |
| CD72      |
| PKLR      |
| ARHGAP30  |
| KCNMB2    |
| IRF6      |
| PARVG     |
| ANO1      |
| DHRS11    |
| TGFA      |
| CDO1      |
| IFNG      |
| RTP4      |
| GJB1      |
| DIRAS3    |
| ITGAL     |

|          |
|----------|
| PRSS8    |
| ATP6V0E2 |
| ECHS1    |
| LPPR5    |
| ANXA3    |
| HLA-DOB  |
| CYBB     |
| CD38     |
| MILR1    |
| PYGL     |
| RUNX2    |
| ADORA2B  |
| SERPINC1 |
| ALS2CL   |
| UNC5D    |
| ARL4D    |
| LINGO2   |
| SPC25    |
| FA2H     |
| IL7R     |
| MECOM    |
| FBXL16   |
| FMO4     |
| TGFB1    |
| SAMHD1   |
| SPI1     |
| COL5A3   |
| GPHN     |
| IFI16    |
| CDCA8    |
| PNPLA3   |
| PGBD5    |
| MT1M     |
| CGN      |
| C1orf162 |
| LONRF2   |
| CDKN1C   |
| OSMR     |
| KRBA1    |
| PCDH17   |
| SLC26A9  |
| PRC1     |
| NLRC4    |

|           |
|-----------|
| NLRC5     |
| TJP3      |
| CCRL2     |
| DACH2     |
| RNF150    |
| AQP11     |
| ATP1A1    |
| OVOL2     |
| PIK3CG    |
| HJURP     |
| EZH2      |
| SIGIRR    |
| SLC23A3   |
| CASP1     |
| LAG3      |
| RARRES2   |
| BBOX1     |
| C5        |
| TCF4      |
| NFATC2    |
| SPAG5     |
| IP6K3     |
| ADCY7     |
| HCK       |
| HIBCH     |
| UCN       |
| SELPLG    |
| MSC       |
| HIST1H2AM |
| GPNMB     |
| CDH4      |
| FUT11     |
| VIM       |
| EVI2B     |
| CASC5     |
| FCER1G    |
| LY86      |
| GBP2      |
| LCK       |
| HEY1      |
| VEGFA     |
| SAMSN1    |
| QDPR      |

|              |
|--------------|
| ATP8B3       |
| SERPINH1     |
| NR3C2        |
| C8orf4       |
| NUSAP1       |
| LOC100507537 |
| SNX20        |
| SFTA2        |
| BSPRY        |
| HLA-F        |
| PHYH         |
| PPM1H        |
| CTSH         |
| HHLA2        |
| C9orf24      |
| LRRK1        |
| TOX2         |
| CMTM4        |
| CHIT1        |
| NCAPH        |
| CRYL1        |
| 44621        |
| GBA3         |
| 44622        |
| C19orf33     |
| HCP5         |
| HIST1H2BK    |
| NQO2         |
| ATHL1        |
| SOBP         |
| ARHGDIB      |
| NAT8L        |
| ENPP1        |
| CAPS         |
| ADAM18       |
| NDC80        |
| CHST11       |
| ASB9         |
| ZNF300P1     |
| C3AR1        |
| ECI2         |
| GBP1         |
| KLHL13       |

|          |
|----------|
| AIM2     |
| MYOF     |
| SEL1L3   |
| POU5F1P4 |
| LZTS1    |
| HGD      |
| SLC9A2   |
| TLCD1    |
| CENPF    |
| GCH1     |
| HOMER2   |
| MARCKS   |
| KLRD1    |
| FRAS1    |
| CPA3     |
| SLC15A3  |
| LIPA     |
| EMILIN2  |
| GPR4     |
| MEST     |
| SSPN     |
| HMCN1    |
| SULT1C2  |
| HLA-DMA  |
| CD300C   |
| FGFBP1   |
| PTGFR    |
| TMED6    |
| ZNF503   |
| PNP      |
| TSPAN33  |
| NFASC    |
| FOXC1    |
| CD14     |
| EDIL3    |
| ARRDC2   |
| HS3ST2   |
| TMEM92   |
| COBLL1   |
| GPR85    |
| RNF43    |
| GGT5     |
| RAPGEF3  |

|          |
|----------|
| OXCT1    |
| TBC1D24  |
| CACNB4   |
| PDGFD    |
| APOD     |
| TNMD     |
| ACADM    |
| ZAP70    |
| HLA-DRA  |
| SIT1     |
| BCAT1    |
| BDNF     |
| CLECL1   |
| IL13RA2  |
| TYMS     |
| PPARGC1A |
| BTN3A3   |
| UQCRC1   |
| ACTG2    |
| FAM64A   |
| LHPP     |
| ITLN1    |
| FLRT1    |
| CRNDE    |
| C11orf54 |
| TPSAB1   |
| NPY1R    |
| CYFIP2   |
| KIF4A    |
| HLA-DMB  |
| RNASE2   |
| RIMKLA   |
| FAM49A   |
| ZC3HAV1L |
| PMEPA1   |
| LRP1     |
| TM7SF2   |
| FLJ13744 |
| RIPPLY1  |
| KCNK5    |
| PREX1    |
| IGSF22   |
| CYP4F12  |



|           |
|-----------|
| FCGR3B    |
| DSP       |
| RASD1     |
| PPP1R36   |
| AEN       |
| AFAP1L1   |
| COL5A2    |
| PROCR     |
| DMGDH     |
| RSPH9     |
| PSORS1C1  |
| NCF1      |
| TBXAS1    |
| ENOX1     |
| AURKB     |
| SLC16A5   |
| FYB       |
| BCL11B    |
| MUM1L1    |
| TRPC2     |
| MICB      |
| LOC400043 |
| MS4A14    |
| PTTG1     |
| KSR1      |
| IL21R     |
| HRSP12    |
| NCF2      |
| CDT1      |
| PPP1R18   |
| PTPN22    |
| RUNX3     |
| KLHL6     |
| PLA2G4F   |
| CCL28     |
| GPR19     |
| TRIM22    |
| CDC6      |
| NLRP3     |
| PLEK      |
| BDKRB2    |
| ABCB4     |
| PANK1     |

|          |
|----------|
| GPR34    |
| HPCAL1   |
| CXorf36  |
| ARHGAP25 |
| NINL     |
| ANGPTL2  |
| DUSP26   |
| LIPH     |
| TDRD9    |
| C2orf54  |
| ADI1     |
| P4HA1    |
| SLC25A25 |
| SACS     |
| CDK18    |
| HLA-G    |
| FGFBP2   |
| SPARC    |
| DLL4     |
| GDPD3    |
| TRIM59   |
| SLC2A1   |
| C16orf74 |
| LILRA2   |
| SPATA17  |
| MBOAT2   |
| SYTL3    |
| HOXA4    |
| GAPT     |
| ANXA4    |
| GRAP     |
| BUB1B    |
| PROM1    |
| ALDH1A2  |
| FAM71E1  |
| DIAPH2   |
| CCR6     |
| LCP1     |
| ADAMTSL2 |
| HLA-DPB2 |
| SIX1     |
| TMEM27   |
| SPHK2    |

|           |
|-----------|
| CDON      |
| SPINK1    |
| SEZ6L2    |
| MYH10     |
| NEFL      |
| PHGDH     |
| MYEOV     |
| KRT222    |
| ATP2C2    |
| PACRG     |
| AKR1B10   |
| RAB37     |
| MYO1F     |
| COL4A1    |
| ECHDC3    |
| GRAMD1C   |
| CD96      |
| NFE2L3    |
| CCDC109B  |
| DPT       |
| ARHGEF26  |
| MYO1G     |
| CD48      |
| DACT2     |
| WLS       |
| GRAMD4    |
| AOAH      |
| LSP1      |
| BICD1     |
| GIMAP4    |
| CSF1R     |
| EMR1      |
| GAL3ST4   |
| IL7       |
| INPP5D    |
| SLC9A9    |
| EMB       |
| PLLP      |
| HTATSF1P2 |
| TGFBR3    |
| MMRN1     |
| MCTP1     |
| RBP2      |

|           |
|-----------|
| NMB       |
| WDR63     |
| SLC25A33  |
| SDSL      |
| RGS9BP    |
| LIN52     |
| SCUBE3    |
| GALNT3    |
| MAGI3     |
| CECR1     |
| PDLIM1    |
| CCDC88A   |
| OAS2      |
| WFDC2     |
| TPRG1     |
| PPP1R1B   |
| CNTD1     |
| CLDN14    |
| ITPR3     |
| TMSB10    |
| LRRIQ3    |
| LAYN      |
| ELF4      |
| CD93      |
| PDZK1     |
| FAM184A   |
| ETS1      |
| SH2B3     |
| FOXJ3     |
| HOXB6     |
| SRD5A2    |
| SIRPA     |
| SLC10A2   |
| KCNE3     |
| HDHD3     |
| RAB7B     |
| KANK4     |
| OIP5      |
| JAG2      |
| HLA-DPA1  |
| MTFP1     |
| LOC145837 |
| PLAT      |

|           |
|-----------|
| PON3      |
| NECAB1    |
| CAMK1D    |
| S100A14   |
| LINC00472 |
| ERO1L     |
| FAM46B    |
| GABARAPL1 |
| ST8SIA1   |
| PLXND1    |
| LCN12     |
| CYP39A1   |
| C6orf223  |
| FAM171A1  |
| HSPB8     |
| TCHH      |
| ACSS3     |
| KDELC1    |
| 44623     |
| TNFRSF1B  |
| C21orf62  |
| LDLRAD3   |
| ARHGAP11A |
| MLKL      |
| DPY19L2P2 |
| SASH3     |
| PLXNC1    |
| BTN3A1    |
| PGAM2     |
| COL9A3    |
| ARPC1B    |
| ELMO1     |
| SIGLEC9   |
| HIGD1A    |
| WBSCR17   |
| LY6E      |
| DEGS1     |
| P2RY13    |
| CCNA2     |
| RNF125    |
| SLC1A4    |
| SEMA6A    |
| TLR1      |

|           |
|-----------|
| BCKDHB    |
| MET       |
| OCLN      |
| HLA-E     |
| MST1      |
| RNF166    |
| FLT1      |
| SLC39A14  |
| PXDN      |
| ZMYND12   |
| RNF149    |
| HACL1     |
| SYT1      |
| ABCA9     |
| APCDD1L   |
| AUH       |
| GLRX5     |
| CGREF1    |
| IL2RG     |
| XK        |
| CIB4      |
| DOK3      |
| FANCI     |
| FGR       |
| LCN2      |
| CDKN2A    |
| RHBDF2    |
| RASSF5    |
| KIF18B    |
| GXYLT2    |
| SLC19A2   |
| TCF19     |
| PDP2      |
| KCNS3     |
| PTPRO     |
| ATAD2     |
| TNFAIP8L2 |
| CD3G      |
| MNX1      |
| STMN3     |
| EIF4EBP1  |
| INSIG2    |
| ERAP2     |

|            |
|------------|
| HINT2      |
| ATP12A     |
| MAP4K4     |
| PTTG3P     |
| HOXD8      |
| TGM2       |
| PPP2R2B    |
| BEX2       |
| C15orf59   |
| CCL21      |
| MARCO      |
| NLRC3      |
| ST3GAL6    |
| TAPBP      |
| IL32       |
| C11orf92   |
| MKI67      |
| ST6GALNAC3 |
| HLA-DOA    |
| ENO1-AS1   |
| CLEC2D     |
| TNFRSF11A  |
| ADAP2      |
| TBC1D10C   |
| CD27       |
| SLC12A6    |
| SAMD3      |
| MDM2       |
| CA2        |
| TPD52L1    |
| CENPH      |
| C2orf15    |
| KCNJ16     |
| AASS       |
| SP140L     |
| KIAA1522   |
| ASAP3      |
| C21orf33   |
| ASF1B      |
| NCAPG      |
| TAGLN2     |
| OGN        |
| TRIM2      |

|           |
|-----------|
| ASAP1     |
| GMIP      |
| SLCO2B1   |
| PRKAR2B   |
| TRAF3IP2  |
| MAN2B1    |
| RAB11FIP4 |
| PODXL     |
| STOX1     |
| MAGI2     |
| DOK2      |
| BTC       |
| FASLG     |
| DGKD      |
| RBPM52    |
| HCG4      |
| NOG       |
| LOC344887 |
| TRIM6     |
| KCNN3     |
| PLAG1     |
| LEAP2     |
| RASGEF1A  |
| NTM       |
| CKAP2L    |
| C11orf85  |
| SH3BGR    |
| PHACTR3   |
| MCM5      |
| PCDHB11   |
| HOXA7     |
| NRL       |
| C1QTNF7   |
| BTBD16    |
| LDHA      |
| GSTZ1     |
| PAQR4     |
| B4GALNT1  |
| ASPHD1    |
| ABCC1     |
| ERGIC1    |
| STK39     |
| LILRA1    |



|          |
|----------|
| EMX2     |
| FECH     |
| IL16     |
| GRHPR    |
| AICDA    |
| CD40     |
| KBTBD12  |
| OMD      |
| MDH1B    |
| ADAMTS8  |
| FRK      |
| COL4A2   |
| GCAT     |
| DOCK4    |
| AFMID    |
| ALDOA    |
| RGS20    |
| ITGAM    |
| SLC27A5  |
| IL10RB   |
| SPATA18  |
| MAOA     |
| KITLG    |
| L2HGDH   |
| CLDN2    |
| FDXR     |
| YEATS2   |
| CLMN     |
| PRSS22   |
| NRP2     |
| CACNA2D4 |
| RHOBTB3  |
| B3GNT5   |
| LILRB5   |
| PRR7     |
| PTPN3    |
| UBE2L6   |
| JAKMIP1  |
| CXCR6    |
| UGT8     |
| SLC16A2  |
| PRR16    |
| ERMP1    |

|              |
|--------------|
| GLS2         |
| LOC100506538 |
| CATSPER1     |
| ARNT2        |
| PPP1R13L     |
| ATP6V1A      |
| CPAMD8       |
| REN          |
| MAD2L1       |
| ARL10        |
| PALM         |
| GIMAP1       |
| TMEM125      |
| WIPF1        |
| BAG2         |
| PLIN4        |
| CORO1C       |
| CLIC3        |
| C3orf70      |
| VNN1         |
| COQ10A       |
| RIC3         |
| LOC100131662 |
| CYGB         |
| DOPEY2       |
| TBX3         |
| ADRA2C       |
| HLA-J        |
| ADHFE1       |
| NUPR1        |
| NAP1L3       |
| HOXB9        |
| MFNG         |
| NEFH         |
| RASD2        |
| CD163L1      |
| LRRC4        |
| THSD7A       |
| LOC100289361 |
| PTAFR        |
| MRPS25       |
| SLC16A1      |
| SEMA3G       |

|          |
|----------|
| AJAP1    |
| FAM198A  |
| NPR3     |
| KDM3A    |
| REEP1    |
| CDCA3    |
| ADAMTSL4 |
| C18orf54 |
| PIP5K1B  |
| CCDC148  |
| MMP9     |
| CBLN4    |
| NR3C1    |
| C1orf64  |
| KIF11    |
| AQP3     |
| STK10    |
| FAM83F   |
| PLAUR    |
| CD160    |
| LRP4     |
| PHLDA3   |
| BLM      |
| SETD7    |
| FMNL1    |
| GNA15    |
| EMX2OS   |
| SLC25A35 |
| RAB15    |
| MCM2     |
| P4HB     |
| HVCN1    |
| CALCRL   |
| AK3      |
| HOXD1    |
| PEBP4    |
| RELT     |
| CTGF     |
| CDH5     |
| BNIP3    |
| GNA14    |
| SLC41A2  |
| WASF3    |

|           |
|-----------|
| TMEM25    |
| DNAJC28   |
| PLEKHG4   |
| UBE2C     |
| GPR18     |
| CRB2      |
| MAMDC2    |
| RNF180    |
| PI16      |
| FAM101B   |
| MUC20     |
| SLC48A1   |
| SPAG5-AS1 |
| ELK3      |
| ZNF165    |
| COL9A2    |
