# Supplementary material for: Identification and Validation of a Novel Ferroptotic Prognostic Genes-Based Signature of Clear Cell Renal Cell Carcinoma
Source: MDPI journal article supplement (doi:10.3390/cancers14194690), 2022-09-27
Supplement: s1 [file s1]

**Table S3** List of genes from FerrDb V2 database.

| symbol  | hgncid     | testin      | confidence | uniprotac | pmid     | latestupdate | datasource  |
|---------|------------|-------------|------------|-----------|----------|--------------|-------------|
| RPL8    | HGNC:10368 | Human       | Validated  | P62917    | 22632970 | 2020/12/31   | FerrDb team |
| IREB2   | HGNC:6115  | Human       | Validated  | P48200    | 22632970 | 2020/12/31   | FerrDb team |
| ATP5MC3 | HGNC:843   | Human       | Validated  | P48201    | 22632970 | 2020/12/31   | FerrDb team |
| CS      | HGNC:2422  | Human       | Validated  | O75390    | 22632970 | 2020/12/31   | FerrDb team |
| EMC2    | HGNC:28963 | Human       | Validated  | Q15006    | 22632970 | 2020/12/31   | FerrDb team |
| ACSF2   | HGNC:26101 | Human       | Validated  | Q96CM8    | 22632970 | 2020/12/31   | FerrDb team |
| NOX1    | HGNC:7889  | Human       | Deduced    | Q9Y5S8    | 22632970 | 2020/12/31   | FerrDb team |
| CYBB    | HGNC:2578  | Human       | Deduced    | P04839    | 22632970 | 2020/12/31   | FerrDb team |
| NOX3    | HGNC:7890  | Human       | Deduced    | Q9HBY0    | 22632970 | 2020/12/31   | FerrDb team |
| NOX4    | HGNC:7891  | Human       | Deduced    | Q9NPH5    | 22632970 | 2020/12/31   | FerrDb team |
| NOX5    | HGNC:14874 | Human       | Deduced    | Q96PH1    | 22632970 | 2020/12/31   | FerrDb team |
| DUOX1   | HGNC:3062  | Human       | Deduced    | Q9NRD9    | 22632970 | 2020/12/31   | FerrDb team |
| DUOX2   | HGNC:13273 | Human       | Deduced    | Q9NRD8    | 22632970 | 2020/12/31   | FerrDb team |
| G6PD    | HGNC:4057  | Human       | Validated  | P11413    | 22632970 | 2020/12/31   | FerrDb team |
| PGD     | HGNC:8891  | Human       | Validated  | P52209    | 22632970 | 2020/12/31   | FerrDb team |
| VDAC2   | HGNC:12672 | Human       | Validated  | P45880    | 22632970 | 2020/12/31   | FerrDb team |
| PIK3CA  | HGNC:8975  | Mice        | Validated  | P42336    | 24739485 | 2020/12/31   | FerrDb team |
| FLT3    | HGNC:3765  | Mice        | Validated  | P36888    | 24739485 | 2020/12/31   | FerrDb team |
| SCP2    | HGNC:10606 | Mice        | Validated  | P22307    | 25402683 | 2020/12/31   | FerrDb team |
| TP53    | HGNC:11998 | Human, mice | Validated  | P04637    | 25799988 | 2020/12/31   | FerrDb team |
| ACSL4   | HGNC:3571  | Human       | Predicted  | O60488    | 25965523 | 2020/12/31   | FerrDb team |
| LPCAT3  | HGNC:30244 | Human       | Predicted  | Q6P1A2    | 25965523 | 2020/12/31   | FerrDb team |
| NRAS    | HGNC:7989  | Human       | Deduced    | P01111    | 26157704 | 2020/12/31   | FerrDb team |

|         |            |             |           |        |          |            |             |
|---------|------------|-------------|-----------|--------|----------|------------|-------------|
| KRAS    | HGNC:6407  | Human       | Deduced   | P01116 | 26157704 | 2020/12/31 | FerrDb team |
| HRAS    | HGNC:5173  | Human       | Deduced   | P01112 | 26157704 | 2020/12/31 | FerrDb team |
| TF      | HGNC:11740 | Mice        | Validated | P02787 | 26166707 | 2020/12/31 | FerrDb team |
| TFRC    | HGNC:11763 | Mice        | Validated | P02786 | 26166707 | 2020/12/31 | FerrDb team |
| TFR2    | HGNC:11762 | Mice        | Validated | Q9UP52 | 26166707 | 2020/12/31 | FerrDb team |
| SLC38A1 | HGNC:13447 | Mice        | Validated | Q9H2H9 | 26166707 | 2020/12/31 | FerrDb team |
| SLC1A5  | HGNC:10943 | Mice        | Validated | Q15758 | 26166707 | 2020/12/31 | FerrDb team |
| GLS2    | HGNC:29570 | Mice        | Validated | Q9UI32 | 26166707 | 2020/12/31 | FerrDb team |
| GOT1    | HGNC:4432  | Mice        | Validated | P17174 | 26166707 | 2020/12/31 | FerrDb team |
| CARS1   | HGNC:1493  | Human, rat  | Validated | P49589 | 26184909 | 2020/12/31 | FerrDb team |
| ALOX5   | HGNC:435   | Mice        | Validated | P09917 | 26235588 | 2020/12/31 | FerrDb team |
| KEAP1   | HGNC:23177 | Human, mice | Validated | Q14145 | 26403645 | 2020/12/31 | FerrDb team |
| HMOX1   | HGNC:5013  | Human, mice | Validated | P09601 | 26405158 | 2020/12/31 | FerrDb team |
| ATG5    | HGNC:589   | Human, mice | Validated | Q9H1Y0 | 27245739 | 2020/12/31 | FerrDb team |
| ATG7    | HGNC:16935 | Human, mice | Validated | O95352 | 27245739 | 2020/12/31 | FerrDb team |
| NCOA4   | HGNC:7671  | Human       | Validated | Q13772 | 27245739 | 2020/12/31 | FerrDb team |
| ALOX12  | HGNC:429   | Human       | Validated | P18054 | 27506793 | 2020/12/31 | FerrDb team |
| ALOX12B | HGNC:430   | Human       | Validated | O75342 | 27506793 | 2020/12/31 | FerrDb team |
| ALOX15  | HGNC:433   | Human       | Validated | P16050 | 27506793 | 2020/12/31 | FerrDb team |
| ALOX15B | HGNC:434   | Human       | Validated | O15296 | 27506793 | 2020/12/31 | FerrDb team |
| ALOXE3  | HGNC:13743 | Human       | Validated | Q9BYJ1 | 27506793 | 2020/12/31 | FerrDb team |
| PHKG2   | HGNC:8931  | Human       | Validated | P15735 | 27506793 | 2020/12/31 | FerrDb team |
| ACO1    | HGNC:117   | Mice        | Screened  | P21399 | 27514700 | 2020/12/31 | FerrDb team |
| ULK1    | HGNC:12558 | Mice        | Validated | O75385 | 27514700 | 2020/12/31 | FerrDb team |
| ATG3    | HGNC:20962 | Mice        | Validated | Q9NT62 | 27514700 | 2020/12/31 | FerrDb team |

|               |            |             |           |        |          |            |             |
|---------------|------------|-------------|-----------|--------|----------|------------|-------------|
| ATG4D         | HGNC:20789 | Mice        | Screened  | Q86TL0 | 27514700 | 2020/12/31 | FerrDb team |
| BECN1         | HGNC:1034  | Mice        | Screened  | Q14457 | 27514700 | 2020/12/31 | FerrDb team |
| MAP1LC3A      | HGNC:6838  | Mice        | Screened  | Q9H492 | 27514700 | 2020/12/31 | FerrDb team |
| GABARAPL<br>2 | HGNC:13291 | Mice        | Screened  | P60520 | 27514700 | 2020/12/31 | FerrDb team |
| GABARAPL<br>1 | HGNC:4068  | Mice        | Screened  | Q9H0R8 | 27514700 | 2020/12/31 | FerrDb team |
| ATG16L1       | HGNC:21498 | Mice        | Screened  | Q676U5 | 27514700 | 2020/12/31 | FerrDb team |
| WIPI1         | HGNC:25471 | Mice        | Screened  | Q5MNZ9 | 27514700 | 2020/12/31 | FerrDb team |
| WIPI2         | HGNC:32225 | Mice        | Screened  | Q9Y4P8 | 27514700 | 2020/12/31 | FerrDb team |
| SNX4          | HGNC:11175 | Mice        | Screened  | O95219 | 27514700 | 2020/12/31 | FerrDb team |
| ATG13         | HGNC:29091 | Mice        | Validated | O75143 | 27514700 | 2020/12/31 | FerrDb team |
| ULK2          | HGNC:13480 | Mice        | Validated | Q8IYT8 | 27514700 | 2020/12/31 | FerrDb team |
| SAT1          | HGNC:10540 | Human, mice | Validated | P21673 | 27698118 | 2020/12/31 | FerrDb team |
| EGFR          | HGNC:3236  | Human       | Validated | P00533 | 28297659 | 2020/12/31 | FerrDb team |
| MAPK3         | HGNC:6877  | Human       | Validated | P27361 | 28297659 | 2020/12/31 | FerrDb team |
| MAPK1         | HGNC:6871  | Human       | Validated | P28482 | 28297659 | 2020/12/31 | FerrDb team |
| BID           | HGNC:1050  | Mice        | Validated | P55957 | 28384611 | 2020/12/31 | FerrDb team |
| ZEB1          | HGNC:11642 | Human       | Validated | P37275 | 28678785 | 2020/12/31 | FerrDb team |
| DPP4          | HGNC:3009  | Human, mice | Validated | P27487 | 28813679 | 2020/12/31 | FerrDb team |
| CDKN2A        | HGNC:1787  | Human, mice | Validated | P42771 | 28985506 | 2020/12/31 | FerrDb team |
| PEBP1         | HGNC:8630  | Human, mice | Validated | P30086 | 29053969 | 2020/12/31 | FerrDb team |
| SOCS1         | HGNC:19383 | Human       | Validated | O15524 | 29081404 | 2020/12/31 | FerrDb team |
| CDO1          | HGNC:1795  | Human       | Validated | Q16878 | 29144989 | 2020/12/31 | FerrDb team |
| MYB           | HGNC:7545  | Human       | Validated | P10242 | 29144989 | 2020/12/31 | FerrDb team |

|           |            |             |           |        |          |            |             |
|-----------|------------|-------------|-----------|--------|----------|------------|-------------|
| MAPK8     | HGNC:6881  | Rat         | Validated | P45983 | 29330409 | 2020/12/31 | FerrDb team |
| MAPK9     | HGNC:6886  | Rat         | Validated | P45984 | 29330409 | 2020/12/31 | FerrDb team |
| CHAC1     | HGNC:28680 | Human       | Validated | Q9BUX1 | 29383104 | 2020/12/31 | FerrDb team |
| MAPK14    | HGNC:6876  | Mice        | Validated | Q16539 | 29436589 | 2020/12/31 | FerrDb team |
| LINC00472 | HGNC:21380 | Human       | Validated | Q9H8W2 | 29588351 | 2020/12/31 | FerrDb team |
| PRKAA2    | HGNC:9377  | Human       | Validated | P54646 | 30057310 | 2020/12/31 | FerrDb team |
| PRKAA1    | HGNC:9376  | Human       | Validated | Q13131 | 30057310 | 2020/12/31 | FerrDb team |
| ELAVL1    | HGNC:3312  | Human, mice | Validated | Q15717 | 30081711 | 2020/12/31 | FerrDb team |
| BAP1      | HGNC:950   | Human       | Validated | Q92560 | 30202049 | 2020/12/31 | FerrDb team |
| ABCC1     | HGNC:51    | Human       | Validated | P33527 | 30726737 | 2020/12/31 | FerrDb team |
| MIR6852   | HGNC:49993 | Human       | Validated | _NA_   | 30787392 | 2020/12/31 | FerrDb team |
| ACVR1B    | HGNC:172   | Human       | Validated | P36896 | 30804470 | 2020/12/31 | FerrDb team |
| TGFBR1    | HGNC:11772 | Human       | Validated | P36897 | 30804470 | 2020/12/31 | FerrDb team |
| EPAS1     | HGNC:3374  | Mice        | Validated | Q99814 | 30962421 | 2020/12/31 | FerrDb team |
| HILPDA    | HGNC:28859 | Mice        | Validated | Q9Y5L2 | 30962421 | 2020/12/31 | FerrDb team |
| HIF1A     | HGNC:4910  | Mice        | Validated | Q16665 | 30962421 | 2020/12/31 | FerrDb team |
| IFNG      | HGNC:5438  | Human, mice | Validated | P01579 | 31043744 | 2020/12/31 | FerrDb team |
| ANO6      | HGNC:25240 | Human, mice | Validated | Q4KMQ2 | 31060306 | 2020/12/31 | FerrDb team |
| LPIN1     | HGNC:13345 | Mice        | Validated | Q14693 | 31061954 | 2020/12/31 | FerrDb team |
| HMGB1     | HGNC:4983  | Human, mice | Validated | P09429 | 31105999 | 2020/12/31 | FerrDb team |
| TNFAIP3   | HGNC:11896 | Human       | Validated | P21580 | 31160087 | 2020/12/31 | FerrDb team |
| TLR4      | HGNC:11850 | Rat         | Validated | O00206 | 31196626 | 2020/12/31 | FerrDb team |
| ATF3      | HGNC:785   | Human       | Validated | P18847 | 31273299 | 2020/12/31 | FerrDb team |
| ATM       | HGNC:795   | Human       | Validated | Q13315 | 31320750 | 2020/12/31 | FerrDb team |
| YY1AP1    | HGNC:30935 | Human, mice | Validated | Q9H869 | 31341276 | 2020/12/31 | FerrDb team |

|        |            |             |           |        |          |            |             |
|--------|------------|-------------|-----------|--------|----------|------------|-------------|
| EGLN2  | HGNC:14660 | Human, mice | Validated | Q96KS0 | 31355331 | 2020/12/31 | FerrDb team |
| MIOX   | HGNC:14522 | Human, mice | Validated | Q9UGB7 | 31437128 | 2020/12/31 | FerrDb team |
| TAZ    | HGNC:11577 | Human, mice | Validated | Q16635 | 31484063 | 2020/12/31 | FerrDb team |
| MTDH   | HGNC:29608 | Human, mice | Validated | Q86UE4 | 31527591 | 2020/12/31 | FerrDb team |
| IDH1   | HGNC:5382  | Human       | Validated | O75874 | 31591388 | 2020/12/31 | FerrDb team |
| SIRT1  | HGNC:14929 | Mice        | Predicted | Q96EB6 | 31610175 | 2020/12/31 | FerrDb team |
| PANX1  | HGNC:8599  | Human, mice | Validated | Q96RD7 | 31694915 | 2020/12/31 | FerrDb team |
| DNAJB6 | HGNC:14888 | Human, mice | Predicted | O75190 | 31701262 | 2020/12/31 | FerrDb team |
| BACH1  | HGNC:935   | Mice        | Validated | O14867 | 31740582 | 2020/12/31 | FerrDb team |
| LONP1  | HGNC:9479  | Human       | Validated | P36776 | 31822343 | 2021/4/11  | FerrDb team |
| CD82   | HGNC:6210  | Human       | Validated |        | 33655331 | 2021/4/16  | FerrDb team |
| IL1B   | HGNC:5992  | Human, mice | Validated | _NA_   | 33376672 | 2021/5/17  | FerrDb team |
| CTSB   | HGNC:2527  | _NA_        | Validated | _NA_   | 33340545 | 2021/5/18  | FerrDb team |
| POR    | HGNC:9208  | Human, mice | Validated | _NA_   | 33321093 | 2021/7/14  | FerrDb team |
| CYB5R1 | HGNC:13397 | Human       | Validated | _NA_   | 33321093 | 2021/7/14  | FerrDb team |
| ELOVL5 | HGNC:21308 | Human       | Validated | _NA_   | 33288688 | 2021/7/21  | FerrDb team |
| FADS1  | HGNC:3574  | Human       | Validated | _NA_   | 33288688 | 2021/7/21  | FerrDb team |
| FBW7   | HGNC:16712 | Human       | Validated | _NA_   | 33271455 | 2021/8/2   | FerrDb team |
| PTEN   | HGNC:9588  | Human       | Deduced   | _NA_   | 33229547 | 2021/8/2   | FerrDb team |
| NR1D1  | HGNC:7962  | Mice        | Deduced   | _NA_   | 33068011 | 2021/8/4   | FerrDb team |
| NR1D2  | HGNC:7963  | Mice        | Deduced   | _NA_   | 33068011 | 2021/8/4   | FerrDb team |
| TBK1   | HGNC:11584 | Mice        | Validated | _NA_   | 33312375 | 2021/8/9   | FerrDb team |
| IL6    | HGNC:6018  | Human, mice | Validated | _NA_   | 33166496 | 2021/8/11  | FerrDb team |
| USP7   | HGNC:12630 | Rat         | Validated | _NA_   | 33157209 | 2021/8/21  | FerrDb team |
| ATF4   | HGNC:786   | Human, mice | Validated | _NA_   | 33055209 | 2021/8/30  | FerrDb team |

|           |            |             |           |      |          |           |             |
|-----------|------------|-------------|-----------|------|----------|-----------|-------------|
| AQP3      | HGNC:636   | _NA_        | Deduced   | _NA_ | 33017631 | 2021/9/1  | FerrDb team |
| AQP5      | HGNC:638   | _NA_        | Deduced   | _NA_ | 33017631 | 2021/9/1  | FerrDb team |
| AQP8      | HGNC:642   | _NA_        | Deduced   | _NA_ | 33017631 | 2021/9/1  | FerrDb team |
| LINC00618 | HGNC:20110 | Human, mice | Validated | _NA_ | 33002417 | 2021/9/8  | FerrDb team |
| MT1DP     | HGNC:7396  | Human       | Validated | _NA_ | 32929075 | 2021/9/15 | FerrDb team |
| PEX10     | HGNC:8851  | Human, mice | Validated | _NA_ | 32939090 | 2021/9/26 | FerrDb team |
| AGPAT3    | HGNC:326   | Human       | Screened  | _NA_ | 32939090 | 2021/9/26 | FerrDb team |
| PEX12     | HGNC:8854  | Human       | Validated | _NA_ | 32939090 | 2021/9/26 | FerrDb team |
| CHP1      | HGNC:17433 | Human       | Screened  | _NA_ | 32939090 | 2021/9/26 | FerrDb team |
| GPAT4     | HGNC:20880 | Human       | Screened  | _NA_ | 32939090 | 2021/9/26 | FerrDb team |
| BRPF1     | HGNC:14255 | Human       | Screened  | _NA_ | 32939090 | 2021/9/26 | FerrDb team |
| OSBPL9    | HGNC:16386 | Human       | Screened  | _NA_ | 32939090 | 2021/9/26 | FerrDb team |
| INTS2     | HGNC:29241 | Human       | Screened  | _NA_ | 32939090 | 2021/9/26 | FerrDb team |
| MMD       | HGNC:7153  | Human       | Screened  | _NA_ | 32939090 | 2021/9/26 | FerrDb team |
| CYP4F8    | HGNC:2648  | Human       | Screened  | _NA_ | 32939090 | 2021/9/26 | FerrDb team |
| MLLT1     | HGNC:7134  | Human       | Screened  | _NA_ | 32939090 | 2021/9/26 | FerrDb team |
| TTPA      | HGNC:12404 | Human       | Screened  | _NA_ | 32939090 | 2021/9/26 | FerrDb team |
| GRIA3     | HGNC:4573  | Human       | Screened  | _NA_ | 32939090 | 2021/9/26 | FerrDb team |
| POM121L12 | HGNC:25369 | Human       | Screened  | _NA_ | 32939090 | 2021/9/26 | FerrDb team |
| LIG3      | HGNC:6600  | Human, mice | Screened  | _NA_ | 32939090 | 2021/9/26 | FerrDb team |
| AEBP2     | HGNC:24051 | Human       | Screened  | _NA_ | 32939090 | 2021/9/26 | FerrDb team |
| AGPS      | HGNC:327   | Human       | Validated | _NA_ | 32939090 | 2021/9/26 | FerrDb team |
| CDCA3     | HGNC:14624 | Human       | Screened  | _NA_ | 32939090 | 2021/9/26 | FerrDb team |
| PEX2      | HGNC:9717  | Human       | Validated | _NA_ | 32939090 | 2021/9/26 | FerrDb team |
| PEX6      | HGNC:8859  | Human       | Screened  | _NA_ | 32939090 | 2021/9/26 | FerrDb team |

|          |            |                   |           |        |          |            |             |
|----------|------------|-------------------|-----------|--------|----------|------------|-------------|
| TIMM9    | HGNC:11819 | Human             | Screened  | _NA_   | 32939090 | 2021/9/26  | FerrDb team |
| DCAF7    | HGNC:30915 | Human             | Screened  | _NA_   | 32939090 | 2021/9/26  | FerrDb team |
| LCE2C    | HGNC:29460 | Human             | Screened  | _NA_   | 32939090 | 2021/9/26  | FerrDb team |
| FAR1     | HGNC:26222 | Human             | Validated | _NA_   | 32939090 | 2021/9/26  | FerrDb team |
| PHF21A   | HGNC:24156 | Human             | Screened  | _NA_   | 32939090 | 2021/9/26  | FerrDb team |
| SMAD7    | HGNC:6773  | Human             | Screened  | _NA_   | 32939090 | 2021/9/26  | FerrDb team |
| LYRM1    | HGNC:25074 | Human             | Screened  | _NA_   | 32939090 | 2021/9/26  | FerrDb team |
| AMN      | HGNC:14604 | Human             | Screened  | _NA_   | 32939090 | 2021/9/26  | FerrDb team |
| PEX3     | HGNC:8858  | Human             | Validated | _NA_   | 32939090 | 2021/9/26  | FerrDb team |
| MTCH1    | HGNC:17586 | Human             | Screened  | _NA_   | 32939090 | 2021/9/26  | FerrDb team |
| ACADSB   | HGNC:91    | Human             | Deduced   | _NA_   | 32776663 | 2021/10/11 | FerrDb team |
| PVT1     | HGNC:9709  | Human, mice       | Validated | _NA_   | 32827544 | 2021/10/13 | FerrDb team |
| SLC39A14 | HGNC:20858 | Mice              | Validated | _NA_   | 32374849 | 2021/10/17 | FerrDb team |
| MAP3K11  | HGNC:6850  | Mice              | Validated | Q16584 | 32710001 | 2021/11/5  | FerrDb team |
| GSK3B    | HGNC:4617  | Human             | Validated | P49841 | 32642794 | 2021/11/11 | FerrDb team |
| BRD7     | HGNC:14310 | Human, mice       | Validated | Q9NPI1 | 32863216 | 2021/11/18 | FerrDb team |
| SLC25A28 | HGNC:23472 | Human, mice       | Validated | Q96A46 | 32863216 | 2021/11/18 | FerrDb team |
| MFN2     | HGNC:16877 | Rat               | Validated | O95140 | 32593899 | 2021/11/18 | FerrDb team |
| SLC11A2  | HGNC:10908 | Human             | Validated | P49281 | 32535745 | 2021/11/21 | FerrDb team |
| ZFAS1    | HGNC:33101 | Human, rat        | Validated | _NA_   | 32453709 | 2021/12/1  | FerrDb team |
| TSC1     | HGNC:12362 | Human, mice       | Validated | Q92574 | 32404875 | 2021/12/2  | FerrDb team |
| TGFB1    | HGNC:11766 | Human             | Deduced   | P01137 | 32471991 | 2021/12/3  | FerrDb team |
| SNCA     | HGNC:11138 | Human             | Validated | P37840 | 32341450 | 2021/12/9  | FerrDb team |
| SIRT3    | HGNC:14931 | Human,<br>porcine | Validated | Q9NTG7 | 32329068 | 2021/12/9  | FerrDb team |



|        |            |             |           |        |          |            |             |
|--------|------------|-------------|-----------|--------|----------|------------|-------------|
| CGAS   | HGNC:21367 | Human       | Validated | Q8N884 | 32186434 | 2021/12/19 | FerrDb team |
| STING1 | HGNC:27962 | Human       | Validated | Q86WV6 | 32186434 | 2021/12/19 | FerrDb team |
| HDDC3  | HGNC:30522 | Human       | Validated | Q8N4P3 | 32462112 | 2021/12/22 | FerrDb team |
| MIR761 | HGNC:37305 | Human       | Validated | _NA_   | 32196629 | 2021/12/24 | FerrDb team |
| MDM2   | HGNC:6973  | Human       | Validated | Q00987 | 32079652 | 2021/12/30 | FerrDb team |
| MDM4   | HGNC:6974  | Human       | Validated | O15151 | 32079652 | 2021/12/30 | FerrDb team |
| MIR214 | HGNC:31591 | Human       | Validated | _NA_   | 31960438 | 2021/12/30 | FerrDb team |
| DLD    | HGNC:2898  | Human       | Validated | P09622 | 31931284 | 2021/12/30 | FerrDb team |
| WWTR1  | HGNC:24042 | Human       | Validated | Q9GZV5 | 31641008 | 2022/1/10  | FerrDb team |
| PRKCA  | HGNC:9393  | Human       | Validated | P17252 | 31173656 | 2022/1/10  | FerrDb team |
| LGMN   | HGNC:9472  | Mice        | Validated | Q99538 | 33431801 | 2022/1/19  | FerrDb team |
| SMPD1  | HGNC:11120 | Human       | Validated | P17405 | 33414455 | 2022/1/26  | FerrDb team |
| MYCN   | HGNC:7559  | Human       | Validated | P04198 | 34011924 | 2022/2/10  | FerrDb team |
| IFNA1  | HGNC:5417  | Human, mice | Deduced   | P01562 | 34385713 | 2022/2/10  | FerrDb team |
| IFNA2  | HGNC:5423  | Human, mice | Deduced   | P01563 | 34385713 | 2022/2/10  | FerrDb team |
| IFNA4  | HGNC:5425  | Human, mice | Deduced   | P05014 | 34385713 | 2022/2/10  | FerrDb team |
| IFNA5  | HGNC:5426  | Human, mice | Deduced   | P01569 | 34385713 | 2022/2/10  | FerrDb team |
| IFNA6  | HGNC:5427  | Human, mice | Deduced   | P05013 | 34385713 | 2022/2/10  | FerrDb team |
| IFNA7  | HGNC:5428  | Human, mice | Deduced   | P01567 | 34385713 | 2022/2/10  | FerrDb team |
| IFNA8  | HGNC:5429  | Human, mice | Deduced   | P32881 | 34385713 | 2022/2/10  | FerrDb team |
| IFNA10 | HGNC:5418  | Human, mice | Deduced   | P01566 | 34385713 | 2022/2/10  | FerrDb team |
| IFNA13 | HGNC:5419  | Human, mice | Deduced   | P01562 | 34385713 | 2022/2/10  | FerrDb team |
| IFNA14 | HGNC:5420  | Human, mice | Deduced   | P01570 | 34385713 | 2022/2/10  | FerrDb team |
| IFNA16 | HGNC:5421  | Human, mice | Deduced   | P05015 | 34385713 | 2022/2/10  | FerrDb team |
| IFNA17 | HGNC:5422  | Human, mice | Deduced   | P01571 | 34385713 | 2022/2/10  | FerrDb team |



|         |            |             |           |        |          |           |             |
|---------|------------|-------------|-----------|--------|----------|-----------|-------------|
| IFNA21  | HGNC:5424  | Human, mice | Deduced   | P01568 | 34385713 | 2022/2/10 | FerrDb team |
| SMG9    | HGNC:25763 | Human       | Validated | Q9H0W8 | 34146907 | 2022/2/23 | FerrDb team |
| PPARG   | HGNC:9236  | Mice        | Validated | P37231 | 34478917 | 2022/2/24 | FerrDb team |
| miR-335 | HGNC:31773 | Rat         | Validated | _NA_   | 33649797 | 2022/2/24 | FerrDb team |
| SNX5    | HGNC:14969 | Rat         | Validated | Q9Y5X3 | 34134000 | 2022/3/3  | FerrDb team |
| PAQR3   | HGNC:30130 | Human       | Validated | Q6TCH7 | 33955706 | 2022/3/9  | FerrDb team |
| MICU1   | HGNC:1530  | Human       | Validated | Q9BPX6 | 33822458 | 2022/3/9  | FerrDb team |
| TOR2A   | HGNC:11996 | Human       | Predicted | Q5JU69 | 34296310 | 2022/3/11 | FerrDb team |
| MIR375  | HGNC:31868 | Human       | Validate  | _NA_   | 34090492 | 2022/3/15 | FerrDb team |
| MAP3K14 | HGNC:6853  | Mice        | Validate  | Q99558 | 34558831 | 2022/3/16 | FerrDb team |
| MIR324  | HGNC:31767 | Human       | Validated | _NA_   | 33662669 | 2022/3/21 | FerrDb team |
| QSOX1   | HGNC:9756  | Human       | Validated | O00391 | 33770521 | 2022/3/21 | FerrDb team |
| MIB2    | HGNC:30577 | Mice        | Validated | Q96AX9 | 34121396 | 2022/3/21 | FerrDb team |
| CLTRN   | HGNC:29437 | Human       | Validated | Q9HBJ8 | 33508374 | 2022/3/21 | FerrDb team |
| KLF2    | HGNC:6347  | Human       | Validated | Q9Y5W3 | 34520818 | 2022/3/21 | FerrDb team |
| MIR5096 | HGNC:41611 | Human       | Validated | _NA_   | 34571083 | 2022/3/21 | FerrDb team |
| HOTAIR  | HGNC:33510 | Rat         | Validated | _NA_   | 33906483 | 2022/3/21 | FerrDb team |
| H19     | HGNC:4713  | Human       | Validated | _NA_   | 34288826 | 2022/3/21 | FerrDb team |
| FOXO4   | HGNC:7139  | Rat         | Deduced   | P98177 | 34296293 | 2022/3/22 | FerrDb team |
| YTHDC2  | HGNC:24721 | Human       | Validated | Q9H6S0 | 33785413 | 2022/3/30 | FerrDb team |
| DDR2    | HGNC:2731  | Human       | Validated | Q16832 | 33603168 | 2022/3/30 | FerrDb team |
| SLC39A7 | HGNC:4927  | Human       | Validated | Q92504 | 33608508 | 2022/3/30 | FerrDb team |
| TRIM46  | HGNC:19019 | Human       | Validated | Q7Z4K8 | 34487731 | 2022/3/30 | FerrDb team |
| ACSL1   | HGNC:3569  | Human       | Validated | P33121 | 33854057 | 2022/3/30 | FerrDb team |
| KDM5A   | HGNC:9886  | Human       | Validated | P29375 | 33741422 | 2022/3/30 | FerrDb team |

|              |            |             |           |        |          |           |             |
|--------------|------------|-------------|-----------|--------|----------|-----------|-------------|
| TRIM21       | HGNC:11312 | Mice        | Validated | P19474 | 34233258 | 2022/3/30 | FerrDb team |
| DPEP1        | HGNC:3002  | Mice        | Validated | P16444 | 34426578 | 2022/3/30 | FerrDb team |
| CYGB         | HGNC:16505 | Human       | Validated | Q8WWM9 | 33611811 | 2022/3/30 | FerrDb team |
| IDO1         | HGNC:6059  | Mice        | Validated | P14902 | 33899121 | 2022/3/30 | FerrDb team |
| GSTZ1        | HGNC:4643  | Human       | Validated | O43708 | 33931597 | 2022/3/30 | FerrDb team |
| GJA1         | HGNC:4274  | Human, mice | Validated | P17302 | 34785303 | 2022/4/6  | FerrDb team |
| SLC7A11      | HGNC:11059 | Human       | Validated | Q9UPY5 | 34722314 | 2022/4/6  | FerrDb team |
| PGRMC1       | HGNC:16090 | Mice        | Validated | O00264 | 34749765 | 2022/4/7  | FerrDb team |
| CIRBP        | HGNC:1982  | Human       | Validated | Q14011 | 34114349 | 2022/4/7  | FerrDb team |
| USP11        | HGNC:12609 | Mice        | Validated | P51784 | 34839355 | 2022/4/7  | FerrDb team |
| YAP          | HGNC:16262 | Human       | Validated | P46937 | 34977009 | 2022/4/7  | FerrDb team |
| MIR135B      | HGNC:31760 | Rat         | Validated | _NA_   | 34485394 | 2022/4/8  | FerrDb team |
| TRIM26       | HGNC:12962 | Human       | Validated | Q12899 | 33869196 | 2022/4/8  | FerrDb team |
| NDRG1        | HGNC:7679  | Human       | Deduced   | Q92597 | 34917147 | 2022/4/8  | FerrDb team |
| MIR302A      | HGNC:31623 | Human       | Validated | _NA_   | 34181495 | 2022/4/8  | FerrDb team |
| ASMTL-AS1    | HGNC:25811 | Human       | Validated | _NA_   | 34658100 | 2022/4/11 | FerrDb team |
| FADS2        | HGNC:3575  | Human       | Validated | O95864 | 34520742 | 2022/4/12 | FerrDb team |
| PIEZO1       | HGNC:28993 | Human, mice | Validated | Q92508 | 34568428 | 2022/4/12 | FerrDb team |
| LIFR         | HGNC:6597  | Human       | Validated | P42702 | 34921145 | 2022/4/12 | FerrDb team |
| PTPN6        | HGNC:9658  | Human       | Validated | P29350 | 34921145 | 2022/4/12 | FerrDb team |
| MIR15A       | HGNC:31543 | Mice        | Validated | _NA_   | 34339707 | 2022/4/17 | FerrDb team |
| EGR1         | HGNC:3238  | Mice        | Validated | P18146 | 34339707 | 2022/4/17 | FerrDb team |
| ADAM23       | HGNC:202   | Human       | Validated | O75077 | 35003396 | 2022/4/17 | FerrDb team |
| ARHGEF26-AS1 | HGNC:41048 | Human       | Validated | _NA_   | 35003396 | 2022/4/17 | FerrDb team |

|         |            |             |           |        |          |            |             |
|---------|------------|-------------|-----------|--------|----------|------------|-------------|
| CPEB1   | HGNC:21744 | Human       | Validated | Q9BZB8 | 34184391 | 2022/4/18  | FerrDb team |
| COX4I2  | HGNC:16232 | Rat         | Validated | Q96KJ9 | 34026834 | 2022/4/18  | FerrDb team |
| TIMP1   | HGNC:11820 | Rat         | Validated | P01033 | 34938604 | 2022/4/25  | FerrDb team |
| KDM6B   | HGNC:29012 | Human, mice | Validated | O15054 | 34542160 | 2022/4/25  | FerrDb team |
| METTL14 | HGNC:29330 | Human, rat  | Validated | Q9HCE5 | 34648132 | 2022/5/5   | FerrDb team |
| MIB1    | HGNC:21086 | Human       | Validated | Q86YT6 | 34670864 | 2022/5/5   | FerrDb team |
| KDM5C   | HGNC:11114 | Human, mice | Validated | P41229 | 34522206 | 2022/5/9   | FerrDb team |
| MEG3    | HGNC:14575 | Mice        | Validated | _NA_   | 34587716 | 2022/5/11  | FerrDb team |
| CCDC6   | HGNC:18782 | Human, mice | Validated | Q16204 | 34841108 | 2022/5/11  | FerrDb team |
| CFL1    | HGNC:1874  | Mice        | Validated | P23528 | 34657120 | 2022/5/16  | FerrDb team |
| PTGS2   | HGNC:9605  | Human       | Validated | P35354 | 24439385 | 2022/3/9   | FerrDb team |
| SLC40A1 | HGNC:10909 | Mice        | Validated | Q9NP59 | 27773819 | 2022/3/9   | FerrDb team |
| FTH1    | HGNC:3976  | Mice        | Validated | P02794 | 27773819 | 2022/3/9   | FerrDb team |
| GPX4    | HGNC:4556  | Mice        | Validated | P36969 | 27773819 | 2022/3/9   | FerrDb team |
| HSPB1   | HGNC:5246  | Mice        | Validated | P04792 | 27773819 | 2022/3/9   | FerrDb team |
| NFE2L2  | HGNC:7782  | Mice        | Validated | Q16236 | 27773819 | 2022/3/9   | FerrDb team |
| AKR1C1  | HGNC:384   | Human       | Validated | Q04828 | 24844246 | 2020/12/31 | FerrDb team |
| AKR1C2  | HGNC:385   | Human       | Validated | P52895 | 24844246 | 2020/12/31 | FerrDb team |
| AKR1C3  | HGNC:386   | Human       | Validated | P42330 | 24844246 | 2020/12/31 | FerrDb team |
| RB1     | HGNC:9884  | Human, mice | Validated | P06400 | 25444922 | 2020/12/31 | FerrDb team |
| HSF1    | HGNC:5224  | Human, mice | Validated | Q00613 | 25728673 | 2020/12/31 | FerrDb team |
| GCLC    | HGNC:4311  | Mice        | Validated | P48506 | 26166707 | 2020/12/31 | FerrDb team |
| SQSTM1  | HGNC:11280 | Human, mice | Validated | Q13501 | 26403645 | 2020/12/31 | FerrDb team |
| NQO1    | HGNC:2874  | Human, mice | Validated | P15559 | 26403645 | 2020/12/31 | FerrDb team |
| MUC1    | HGNC:7508  | Human       | Validated | P15941 | 26930718 | 2020/12/31 | FerrDb team |

|        |            |             |           |        |          |            |             |
|--------|------------|-------------|-----------|--------|----------|------------|-------------|
| SLC3A2 | HGNC:11026 | Mice        | Validated | P08195 | 26945935 | 2020/12/31 | FerrDb team |
| MT1G   | HGNC:7399  | Human, mice | Validated | P13640 | 27015352 | 2020/12/31 | FerrDb team |
| CISD1  | HGNC:30880 | Human       | Validated | Q9NZ45 | 27510639 | 2020/12/31 | FerrDb team |
| FANCD2 | HGNC:3585  | Mice        | Validated | Q9BXW9 | 27773819 | 2020/12/31 | FerrDb team |
| FTMT   | HGNC:17345 | Mice, fly   | Validated | Q8N4E7 | 28066232 | 2020/12/31 | FerrDb team |
| HSPA5  | HGNC:5238  | Human, mice | Validated | P11021 | 28130223 | 2020/12/31 | FerrDb team |
| HELLS  | HGNC:4861  | Human, mice | Validated | Q9NRZ9 | 28900510 | 2020/12/31 | FerrDb team |
| SCD    | HGNC:10571 | Human       | Validated | O00767 | 28900510 | 2020/12/31 | FerrDb team |
| SRC    | HGNC:11283 | Human       | Validated | P12931 | 28972104 | 2020/12/31 | FerrDb team |
| STAT3  | HGNC:11364 | Human       | Validated | P40763 | 28972104 | 2020/12/31 | FerrDb team |
| PML    | HGNC:9113  | Human       | Validated | P29590 | 29081404 | 2020/12/31 | FerrDb team |
| MTOR   | HGNC:3942  | Mice        | Validated | P42345 | 29127238 | 2020/12/31 | FerrDb team |
| NFS1   | HGNC:15910 | Human       | Validated | Q9Y697 | 29168506 | 2020/12/31 | FerrDb team |
| TP63   | HGNC:15979 | Human       | Validated | Q9H3D4 | 29212036 | 2020/12/31 | FerrDb team |
| CDKN1A | HGNC:1784  | Human       | Validated | P38936 | 29346757 | 2020/12/31 | FerrDb team |
| MIR137 | HGNC:31523 | Human, mice | Validated | _NA_   | 29348676 | 2020/12/31 | FerrDb team |
| ENPP2  | HGNC:3357  | Rat         | Validated | Q13822 | 29551679 | 2020/12/31 | FerrDb team |
| FH     | HGNC:3700  | Human       | Validated | P07954 | 29917289 | 2020/12/31 | FerrDb team |
| CISD2  | HGNC:24212 | Human       | Validated | Q8N5K1 | 29928961 | 2020/12/31 | FerrDb team |
| MIR9-1 | HGNC:31641 | Human       | Validated | _NA_   | 30035324 | 2020/12/31 | FerrDb team |
| MIR9-2 | HGNC:31642 | Human       | Validated | _NA_   | 30035324 | 2020/12/31 | FerrDb team |
| MIR9-3 | HGNC:31646 | Human       | Validated | _NA_   | 30035324 | 2020/12/31 | FerrDb team |
| CBS    | HGNC:1550  | Human, mice | Validated | P35520 | 30258181 | 2020/12/31 | FerrDb team |
| ISCU   | HGNC:29882 | Human       | Validated | Q9H1K1 | 30557609 | 2020/12/31 | FerrDb team |
| ACSL3  | HGNC:3570  | Human       | Validated | O95573 | 30686757 | 2020/12/31 | FerrDb team |

|           |            |             |           |        |          |            |             |
|-----------|------------|-------------|-----------|--------|----------|------------|-------------|
| OTUB1     | HGNC:23077 | Human, mice | Validated | Q96FW1 | 30709928 | 2020/12/31 | FerrDb team |
| CD44      | HGNC:1681  | Human       | Validated | P16070 | 30709928 | 2020/12/31 | FerrDb team |
| LINC00336 | HGNC:33813 | Human       | Validated | Q6ZUF6 | 30787392 | 2020/12/31 | FerrDb team |
| BRD4      | HGNC:13575 | Human       | Validated | O60885 | 30988278 | 2020/12/31 | FerrDb team |
| PRDX6     | HGNC:16753 | Human       | Validated | P30041 | 31036877 | 2020/12/31 | FerrDb team |
| MIR17     | HGNC:31547 | Human       | Validated | _NA_   | 31160087 | 2020/12/31 | FerrDb team |
| SESN2     | HGNC:20746 | Human, mice | Validated | P58004 | 31323261 | 2020/12/31 | FerrDb team |
| NF2       | HGNC:7773  | Human, mice | Validated | P35240 | 31341276 | 2020/12/31 | FerrDb team |
| ARNTL     | HGNC:701   | Human, mice | Validated | O00327 | 31355331 | 2020/12/31 | FerrDb team |
| JUN       | HGNC:6204  | Human, mice | Deduced   | P05412 | 31394193 | 2020/12/31 | FerrDb team |
| CA9       | HGNC:1383  | Human       | Validated | Q16790 | 31442913 | 2020/12/31 | FerrDb team |
| TMBIM4    | HGNC:24257 | Human, mice | Validated | Q9HC24 | 31507082 | 2020/12/31 | FerrDb team |
| PLIN2     | HGNC:248   | Human, mice | Screened  | Q99541 | 31520166 | 2020/12/31 | FerrDb team |
| MIR212    | HGNC:31589 | Mice        | Validated | _NA_   | 31533781 | 2020/12/31 | FerrDb team |
| AIFM2     | HGNC:21411 | Human, mice | Validated | Q9BRQ8 | 31634899 | 2020/12/31 | FerrDb team |
| LAMP2     | HGNC:6501  | Human       | Validated | P13473 | 31672277 | 2020/12/31 | FerrDb team |
| ZFP36     | HGNC:12862 | Human, mice | Validated | P26651 | 31679460 | 2020/12/31 | FerrDb team |
| PROM2     | HGNC:20685 | Human       | Validated | Q8N271 | 31735663 | 2020/12/31 | FerrDb team |
| CHMP5     | HGNC:26942 | Human, mice | Validated | Q9NZZ3 | 31761326 | 2020/12/31 | FerrDb team |
| CHMP6     | HGNC:25675 | Human, mice | Validated | Q96FZ7 | 31761326 | 2020/12/31 | FerrDb team |
| CAV1      | HGNC:1527  | Human, mice | Validated | Q03135 | 31877357 | 2020/12/31 | FerrDb team |
| GCH1      | HGNC:4193  | Human       | Validated | P30793 | 31989025 | 2021/5/15  | FerrDb team |
| DAZAP1    | HGNC:2683  | _NA_        | Validated | Q96EP5 | 33358859 | 2021/7/2   | FerrDb team |
| PIR       | HGNC:30048 | Human, mice | Validated | O00625 | 33373853 | 2021/7/2   | FerrDb team |
| FTL       | HGNC:3999  | Rat         | Validated | P02792 | 33333054 | 2021/7/12  | FerrDb team |

|         |            |             |           |        |          |            |             |
|---------|------------|-------------|-----------|--------|----------|------------|-------------|
| HCAR1   | HGNC:4532  | Human, mice | Validated | Q9BXC0 | 33296645 | 2021/7/12  | FerrDb team |
| SLC16A1 | HGNC:10922 | Human, mice | Validated | P53985 | 33296645 | 2021/7/16  | FerrDb team |
| RRM2    | HGNC:10452 | Human       | Validated | P31350 | 33372599 | 2021/7/19  | FerrDb team |
| NR4A1   | HGNC:7980  | Human       | Deduced   | P22736 | 33271455 | 2021/8/2   | FerrDb team |
| RPTOR   | HGNC:30287 | Human       | Deduced   | Q8N122 | 33229547 | 2021/8/2   | FerrDb team |
| SREBF1  | HGNC:11289 | Human       | Validated | P36956 | 33229547 | 2021/8/2   | FerrDb team |
| SREBF2  | HGNC:11290 | Human       | Validated | Q12772 | 33203734 | 2021/8/6   | FerrDb team |
| FZD7    | HGNC:4045  | Human, mice | Validated | O75084 | 33172933 | 2021/8/9   | FerrDb team |
| P4HB    | HGNC:8548  | Human       | Deduced   | P07237 | 33124817 | 2021/8/21  | FerrDb team |
| NT5DC2  | HGNC:25717 | _NA_        | Deduced   | Q9H857 | 33124817 | 2021/8/21  | FerrDb team |
| BCAT2   | HGNC:977   | Human       | Validated | O15382 | 33097833 | 2021/8/23  | FerrDb team |
| PLA2G6  | HGNC:9039  | Human, mice | Validated | O60733 | 33087576 | 2021/8/27  | FerrDb team |
| MIR424  | HGNC:31881 | Human       | Validated | _NA_   | 33038905 | 2021/8/30  | FerrDb team |
| PARK7   | HGNC:16369 | Human, mice | Validated | Q99497 | 33024240 | 2021/9/1   | FerrDb team |
| FXN     | HGNC:3951  | Human       | Validated | Q16595 | 33017621 | 2021/9/3   | FerrDb team |
| SUV39H1 | HGNC:11479 | Human       | Validated | O43463 | 33643820 | 2021/9/3   | FerrDb team |
| ATF2    | HGNC:784   | Human       | Validated | P15336 | 33008584 | 2021/9/6   | FerrDb team |
| ACOT1   | HGNC:33128 | Mice        | Validated | Q86TX2 | 32934217 | 2021/9/15  | FerrDb team |
| ALDH3A2 | HGNC:403   | Mice        | Validated | P51648 | 32458004 | 2021/9/17  | FerrDb team |
| STK11   | HGNC:11389 | Human       | Validated | Q15831 | 32883948 | 2021/9/17  | FerrDb team |
| FNDC5   | HGNC:20240 | Human, mice | Deduced   | Q8NAU1 | 32997405 | 2021/9/26  | FerrDb team |
| CDH1    | HGNC:1748  | Human, mice | Validated | P12830 | 32896720 | 2021/9/27  | FerrDb team |
| NEDD4L  | HGNC:7728  | Human       | Validated | Q96PU5 | 32811647 | 2021/10/14 | FerrDb team |
| BRD2    | HGNC:1103  | Human       | Deduced   | P25440 | 32937365 | 2021/10/28 | FerrDb team |

|            |            |             |           |                         |          |            |             |
|------------|------------|-------------|-----------|-------------------------|----------|------------|-------------|
| BRD3       | HGNC:1104  | Human       | Deduced   | Q15059 聽<br>(BRD3_HUMAN | 32937365 | 2021/10/28 | FerrDb team |
| BRDT       | HGNC:1105  | Human       | Deduced   | Q58F21                  | 32937365 | 2021/10/28 | FerrDb team |
| DECR1      | HGNC:2753  | Human       | Validated | Q16698                  | 32686647 | 2021/11/11 | FerrDb team |
| GLRX5      | HGNC:20134 | Human, mice | Validated | Q86SX6                  | 32685019 | 2021/11/20 | FerrDb team |
| NCOA3      | HGNC:7670  | Human       | Deduced   | Q9Y6Q9                  | 32536370 | 2021/11/26 | FerrDb team |
| NR5A2      | HGNC:7984  | Human       | Deduced   | O00482                  | 32536370 | 2021/11/26 | FerrDb team |
| PANX2      | HGNC:8600  | Human       | Validated | Q96RD6                  | 32547072 | 2021/12/1  | FerrDb team |
| RHEBP1     | HGNC:10010 | Human, mice | Validated | _NA_                    | 32404875 | 2021/12/2  | FerrDb team |
| TFAP2A     | HGNC:11742 | Human       | Validated | P05549                  | 32432738 | 2021/12/9  | FerrDb team |
| CP         | HGNC:2295  | Human       | Validated | P00450                  | 32283255 | 2021/12/9  | FerrDb team |
| ARF6       | HGNC:659   | Human       | Validated | P62330                  | 32368394 | 2021/12/16 | FerrDb team |
| GDF15      | HGNC:30142 | Human       | Validated | Q99988                  | 32209255 | 2021/12/17 | FerrDb team |
| ABHD12     | HGNC:15868 | Human       | Validated | Q8N2K0                  | 32195565 | 2021/12/17 | FerrDb team |
| PPP1R13L   | HGNC:18838 | Mice        | Validated | Q8WUF5                  | 32203170 | 2021/12/19 | FerrDb team |
| TFAM       | HGNC:11741 | Human       | Validated | Q00059                  | 32186434 | 2021/12/19 | FerrDb team |
| KDM3B      | HGNC:1337  | Human       | Validated | Q7LBC6                  | 32107878 | 2021/12/20 | FerrDb team |
| RNF113A    | HGNC:12974 | Human       | Validated | O15541                  | 32152280 | 2021/12/20 | FerrDb team |
| AHCY       | HGNC:343   | Human       | Deduced   | P23526                  | 32144268 | 2021/12/21 | FerrDb team |
| circ-TTBK2 | HGNC:19141 | Human       | Validated | Q6IQ55                  | 32196629 | 2021/12/22 | FerrDb team |
| MIR522     | HGNC:32127 | Human       | Validated | _NA_                    | 32106859 | 2021/12/22 | FerrDb team |
| IDH2       | HGNC:5383  | Human, mice | Validated | P48735                  | 32089268 | 2021/12/30 | FerrDb team |
| PPARA      | HGNC:9232  | Human       | Validated | Q07869                  | 32079652 | 2021/12/30 | FerrDb team |



|        |            |       |           |        |          |            |             |
|--------|------------|-------|-----------|--------|----------|------------|-------------|
| NOS2   | HGNC:7873  | Mice  | Validated | P35228 | 32080625 | 2021/12/30 | FerrDb team |
| SIAH2  | HGNC:10858 | Human | Validated | O43255 | 32042051 | 2021/12/30 | FerrDb team |
| RELA   | HGNC:9955  | Mice  | Validated | Q04206 | 32015337 | 2021/12/31 | FerrDb team |
| VDR    | HGNC:12679 | Mice  | Validated | P11473 | 31996668 | 2021/12/30 | FerrDb team |
| NEDD4  | HGNC:7727  | Human | Validated | P46934 | 31974380 | 2021/12/30 | FerrDb team |
| PRDX1  | HGNC:9352  | Human | Deduced   | Q06830 | 31901729 | 2022/1/7   | FerrDb team |
| AR     | HGNC:644   | Human | Validated | P10275 | 31896509 | 2022/1/7   | FerrDb team |
| MTF1   | HGNC:7428  | Human | Validated | Q14872 | 31320750 | 2022/1/10  | FerrDb team |
| COPZ1  | HGNC:2243  | Human | Validated | P61923 | 33420375 | 2022/1/19  | FerrDb team |
| NUPR1  | HGNC:29990 | Human | Validated | O60356 | 33510144 | 2022/1/26  | FerrDb team |
| USP35  | HGNC:20061 | Human | Validated | Q9P2H5 | 33931967 | 2022/1/26  | FerrDb team |
| NEAT1  | HGNC:30815 | Human | Validated | _NA_   | 33730930 | 2022/2/24  | FerrDb team |
| PARP1  | HGNC:270   | Human | Deduced   | P09874 | 33722571 | 2022/3/2   | FerrDb team |
| PARP2  | HGNC:272   | Human | Deduced   | Q9UGN5 | 33722571 | 2022/3/2   | FerrDb team |
| PARP3  | HGNC:273   | Human | Deduced   | Q9Y6F1 | 33722571 | 2022/3/2   | FerrDb team |
| PARP4  | HGNC:271   | Human | Deduced   | Q9UKK3 | 33722571 | 2022/3/2   | FerrDb team |
| PARP6  | HGNC:26921 | Human | Deduced   | Q2NL67 | 33722571 | 2022/3/2   | FerrDb team |
| PARP8  | HGNC:26124 | Human | Deduced   | Q8N3A8 | 33722571 | 2022/3/2   | FerrDb team |
| PARP9  | HGNC:24118 | Human | Deduced   | Q8IXQ6 | 33722571 | 2022/3/2   | FerrDb team |
| PARP10 | HGNC:25895 | Human | Deduced   | Q53GL7 | 33722571 | 2022/3/2   | FerrDb team |
| PARP11 | HGNC:1186  | Human | Deduced   | Q9NR21 | 33722571 | 2022/3/2   | FerrDb team |
| PARP12 | HGNC:21919 | Human | Deduced   | Q9H0J9 | 33722571 | 2022/3/2   | FerrDb team |
| PARP14 | HGNC:29232 | Human | Deduced   | Q460N5 | 33722571 | 2022/3/2   | FerrDb team |
| PARP15 | HGNC:26876 | Human | Deduced   | Q460N3 | 33722571 | 2022/3/2   | FerrDb team |
| PARP16 | HGNC:26040 | Human | Deduced   | Q8N5Y8 | 33722571 | 2022/3/2   | FerrDb team |

|          |            |             |           |        |          |           |             |
|----------|------------|-------------|-----------|--------|----------|-----------|-------------|
| PDSS2    | HGNC:23041 | Human       | Validated | Q86YH6 | 33929387 | 2022/3/2  | FerrDb team |
| TXN      | HGNC:12435 | Mice        | Validated | P10599 | 33634378 | 2022/3/2  | FerrDb team |
| SENP1    | HGNC:17927 | Rat         | Validated | Q9P0U3 | 33746578 | 2022/3/3  | FerrDb team |
| OIP5-AS1 | HGNC:43563 | Human       | Validated | _NA_   | 34051661 | 2022/3/3  | FerrDb team |
| MIR190A  | HGNC:31560 | Human       | Validated | _NA_   | 34111670 | 2022/3/3  | FerrDb team |
| FGF21    | HGNC:3678  | Mice        | Validated | Q9NSA1 | 34530349 | 2022/3/7  | FerrDb team |
| CREB1    | HGNC:2345  | Human       | Deduced   | P16220 | 33846793 | 2022/3/7  | FerrDb team |
| CREB3    | HGNC:2347  | Human       | Deduced   | O43889 | 33846793 | 2022/3/7  | FerrDb team |
| CREB5    | HGNC:16844 | Human       | Deduced   | Q02930 | 33846793 | 2022/3/7  | FerrDb team |
| MIR130B  | HGNC:31515 | Human       | Validated | _NA_   | 34117611 | 2022/3/10 | FerrDb team |
| BEX1     | HGNC:1036  | Human       | Validated | Q9HBH7 | 33745298 | 2022/3/10 | FerrDb team |
| ASAH2    | HGNC:18860 | Mice        | Validated | Q9NR71 | 33547170 | 2022/3/15 | FerrDb team |
| FABP4    | HGNC:3559  | Human       | Validated | P15090 | 34030117 | 2022/3/15 | FerrDb team |
| AKT1S1   | HGNC:28426 | Human       | Deduced   | Q96B36 | 33707434 | 2022/3/15 | FerrDb team |
| MLST8    | HGNC:24825 | Human       | Deduced   | Q9BVC4 | 33707434 | 2022/3/15 | FerrDb team |
| TYRO3    | HGNC:12446 | Human, mice | Validated | Q06418 | 33855973 | 2022/3/16 | FerrDb team |
| SIRT6    | HGNC:14934 | Human       | Validated | Q8N6T7 | 34530350 | 2022/3/16 | FerrDb team |
| TMSB4X   | HGNC:11881 | Human, rat  | Deduced   | P62328 | 34280397 | 2022/3/16 | FerrDb team |
| TMSB4Y   | HGNC:11882 | Human, rat  | Deduced   | O14604 | 34280397 | 2022/3/16 | FerrDb team |
| KIF20A   | HGNC:9787  | Human       | Validated | O95235 | 33819186 | 2022/3/16 | FerrDb team |
| ECH1     | HGNC:3149  | Human, mice | Validated | Q13011 | 33813878 | 2022/3/16 | FerrDb team |
| ETV4     | HGNC:3493  | Human       | Validated | P43268 | 34283663 | 2022/3/21 | FerrDb team |
| MEG8     | HGNC:14574 | Human       | Validated | _NA_   | 33839417 | 2022/3/21 | FerrDb team |
| VCP      | HGNC:12666 | Human       | Validated | P55072 | 34033175 | 2022/3/21 | FerrDb team |
| RBMS1    | HGNC:9907  | Human       | Validated | P29558 | 34609966 | 2022/3/30 | FerrDb team |

|          |            |             |           |        |          |           |             |
|----------|------------|-------------|-----------|--------|----------|-----------|-------------|
| KDM4A    | HGNC:22978 | Human       | Validated | O75164 | 33689883 | 2022/3/30 | FerrDb team |
| MGST1    | HGNC:7061  | Human       | Validated | P10620 | 33539732 | 2022/3/30 | FerrDb team |
| MPC1     | HGNC:21606 | Human       | Validated | Q9Y5U8 | 33741422 | 2022/3/30 | FerrDb team |
| CHMP1A   | HGNC:8740  | Mice        | Validated | Q9HD42 | 34426578 | 2022/3/30 | FerrDb team |
| CAMKK2   | HGNC:1470  | Human       | Validated | Q96RR4 | 34242660 | 2022/3/30 | FerrDb team |
| SOX2     | HGNC:11195 | Human, mice | Validated | P48431 | 34385181 | 2022/3/31 | FerrDb team |
| SRSF9    | HGNC:10791 | Human       | Validated | Q13242 | 33609745 | 2022/3/31 | FerrDb team |
| PROK2    | HGNC:18455 | Mice        | Validated | Q9HC23 | 34244497 | 2022/3/31 | FerrDb team |
| MIR4443  | HGNC:41830 | Human       | Validated | _NA_   | 33781830 | 2022/4/6  | FerrDb team |
| SIRT2    | HGNC:10886 | Mice        | Validated | Q8IXJ6 | 34102645 | 2022/4/6  | FerrDb team |
| MIR27A   | HGNC:31613 | Human       | Validated | _NA_   | 34722314 | 2022/4/6  | FerrDb team |
| MIR670   | HGNC:37304 | Human       | Validated | _NA_   | 34323631 | 2022/4/7  | FerrDb team |
| MEF2C    | HGNC:6996  | Human       | Validated | Q06413 | 33984142 | 2022/4/7  | FerrDb team |
| EZH2     | HGNC:3527  | Human       | Validated | Q15910 | 34614259 | 2022/4/7  | FerrDb team |
| PEDS1    | HGNC:16735 | Human       | Validated | A5PLL7 | 33731874 | 2022/4/7  | FerrDb team |
| ADAMTS13 | HGNC:1366  | Mice        | Validated | Q76LX8 | 34666603 | 2022/4/8  | FerrDb team |
| CDC25A   | HGNC:1725  | Human       | Validated | P30304 | 34743185 | 2022/4/8  | FerrDb team |
| PPARD    | HGNC:9235  | Mice        | Validated | Q03181 | 34649350 | 2022/4/11 | FerrDb team |
| ENO3     | HGNC:3354  | Mice        | Validated | P13929 | 33987359 | 2022/4/12 | FerrDb team |
| LCN2     | HGNC:6526  | Human       | Validated | P80188 | 34921145 | 2022/4/12 | FerrDb team |
| MARCHF5  | HGNC:26025 | Rat         | Validated | Q9NX47 | 34390730 | 2022/4/17 | FerrDb team |
| TRIB2    | HGNC:30809 | Human       | Validated | Q92519 | 34315867 | 2022/4/17 | FerrDb team |
| DHODH    | HGNC:2867  | Human       | Validated | Q02127 | 33981038 | 2022/4/18 | FerrDb team |
| MIR545   | HGNC:32531 | Human       | Validated | _NA_   | 34954694 | 2022/4/18 | FerrDb team |
| PDK4     | HGNC:8812  | Human       | Validated | Q16654 | 33626342 | 2022/4/18 | FerrDb team |

|          |            |             |           |        |          |           |             |
|----------|------------|-------------|-----------|--------|----------|-----------|-------------|
| MIR9-3HG | HGNC:27388 | Mice        | Validated | _NA_   | 34953631 | 2022/4/24 | FerrDb team |
| ADIPOQ   | HGNC:13633 | Mice        | Validated | Q15848 | 34859390 | 2022/4/25 | FerrDb team |
| PTPN18   | HGNC:9649  | Human       | Validated | Q99952 | 33642877 | 2022/5/5  | FerrDb team |
| ABCC5    | HGNC:56    | Human       | Validated | O15440 | 34768109 | 2022/5/11 | FerrDb team |
| CISD3    | HGNC:27578 | Human       | Validated | P0C7P0 | 34497268 | 2022/5/11 | FerrDb team |
| MS4A15   | HGNC:28573 | Mice        | Validated | Q8N5U1 | 34663908 | 2022/5/11 | FerrDb team |
| FURIN    | HGNC:8568  | Human, mice | Deduced   | P09958 | 33640301 | 2022/5/11 | FerrDb team |
| GALNT14  | HGNC:22946 | Human       | Validated | Q96FL9 | 34643088 | 2022/5/16 | FerrDb team |
| KLHDC3   | HGNC:20704 | Human       | Validated | Q9BQ90 | 34743205 | 2022/5/16 | FerrDb team |
