# Supplementary material for: Identification and Validation of a Novel Ferroptotic Prognostic Genes-Based Signature of Clear Cell Renal Cell Carcinoma
Source: MDPI journal article supplement (doi:10.3390/cancers14194690), 2022-09-27
Supplement: s1 [file s1]

**Table S5** List of 41 DEGs.

| Gene name |
|-----------|
| DPEP1     |
| NOX4      |
| TYRO3     |
| MIOX      |
| VDR       |
| MT1G      |
| CDO1      |
| GCH1      |
| GLS2      |
| GABARAPL1 |
| LCN2      |
| PROM2     |
| AQP3      |
| ACSF2     |
| GLRX5     |
| ALOX5     |
| CP        |
| SCD       |
| TIMP1     |
| SLC39A14  |
| PPP1R13L  |
| TGFB1     |
| CAV1      |
| EZH2      |
| CA9       |
| IFNG      |
| CDCA3     |
| KIF20A    |
| IDO1      |
| HILPDA    |
| EGFR      |
| PLIN2     |
| CDKN2A    |
| SLC7A11   |
| GJA1      |
| SLC16A1   |
| CYGB      |
| CYBB      |
| RRM2      |
| NUPR1     |
| P4HB      |
