# Supplementary material for: Identification and Validation of a Novel Ferroptotic Prognostic Genes-Based Signature of Clear Cell Renal Cell Carcinoma
Source: MDPI journal article supplement (doi:10.3390/cancers14194690), 2022-09-27
Supplement: s1 [file s1]

**Table S1** Primer sequences of genes

| Gene           |   | Sequence(5'-3')        |
|----------------|---|------------------------|
| $\beta$ -actin | F | CGTGCGTGACATTAAGGAGAAG |
|                | R | GGAAGGAAGGCTGGAAGAGTG  |
| DPEP1          | F | CCCAAAGGGTGACAAGC      |
|                | R | CCTGCGGGCACTCTATC      |
| NOX4           | F | GCACAGTACAGGCACAAAGG   |
|                | R | ATTTAGATACCCACCCTCCC   |
| MT1G           | F | GCTGCACTTCTCCGATGC     |
|                | R | TGCCGCTGGTGTCTCCT      |
| GLS2           | F | GAAATTCGGAACAAGACTGTG  |
|                | R | AACTTCGATGTGTCCTTCAG   |
| GLRX5          | F | GGGACCCTTGGAACACC      |
|                | R | CCTGCGGGCACTCTATC      |
| TIMP1          | F | TGTGGGACCTGTGGAAGTA    |
|                | R | TGTTGTTGCTGTGGCTGAT    |
| CA9            | F | GGAGCCCTCTTCTTCTGATTTA |
|                | R | GCTGCTTCTGGTGCCTGTC    |
| CDCA3          | F | TCCGTGCAATACCAAGAGTA   |
|                | R | AGCCAAGAGCGTCCCA       |
| CYBB           | F | TGAGAATGGATGCGAAGG     |
|                | R | CTAAGATAGCGGTTGATGGG   |
